# Supplementary material for: Titration of 124 antibodies using CITE-Seq on human PBMCs
Source: PubMed Central journal article supplement (PMC9718773; doi:10.1038/s41598-022-24371-7), 2022-12-02

**CD10**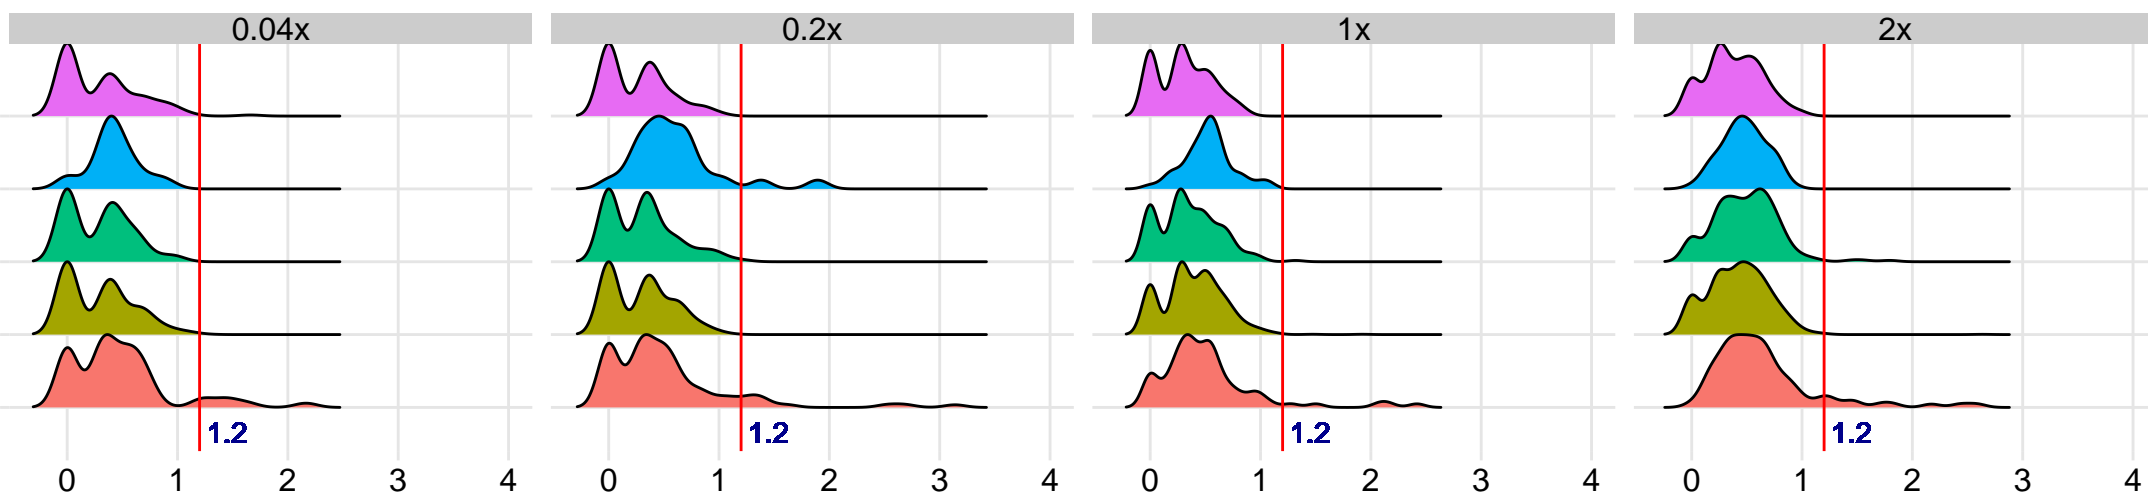**CD101**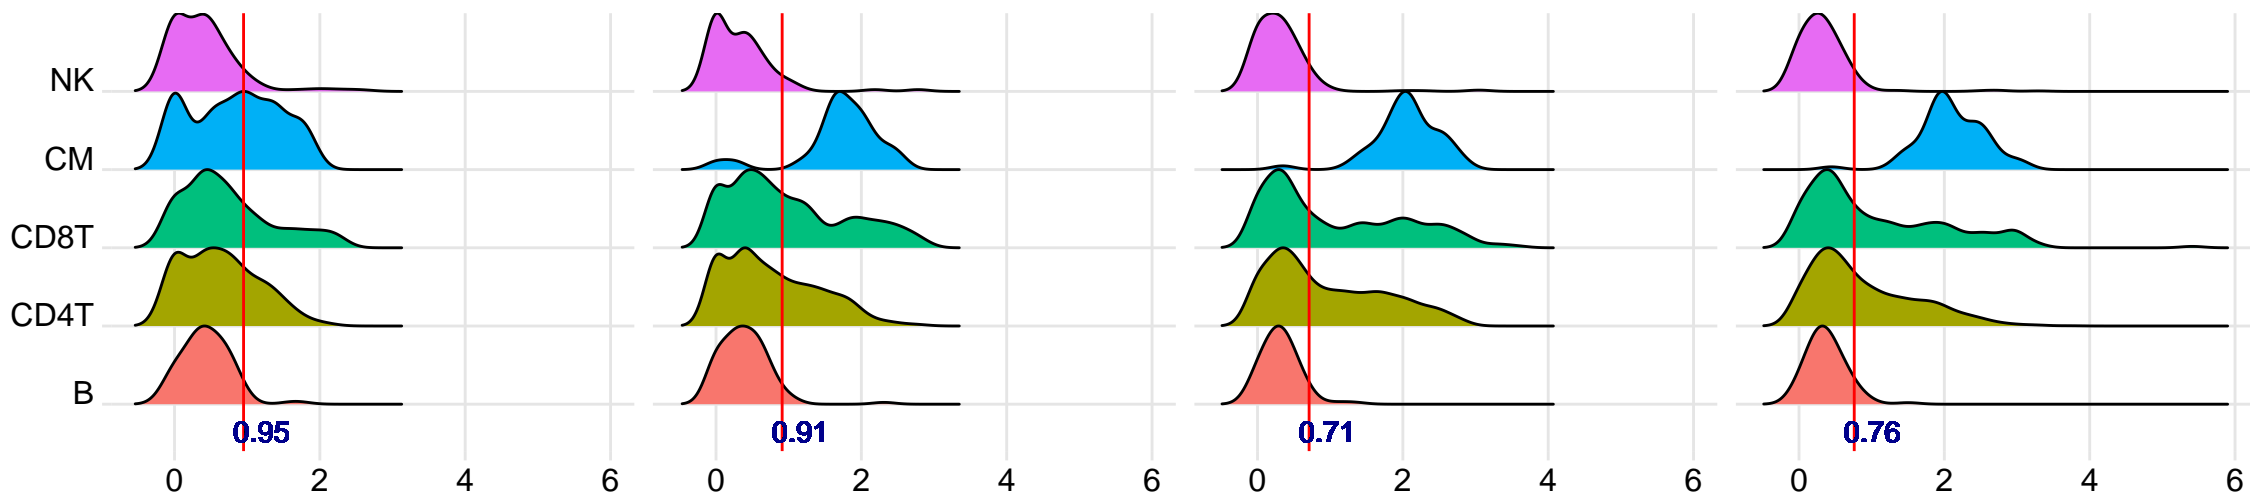**CD107a**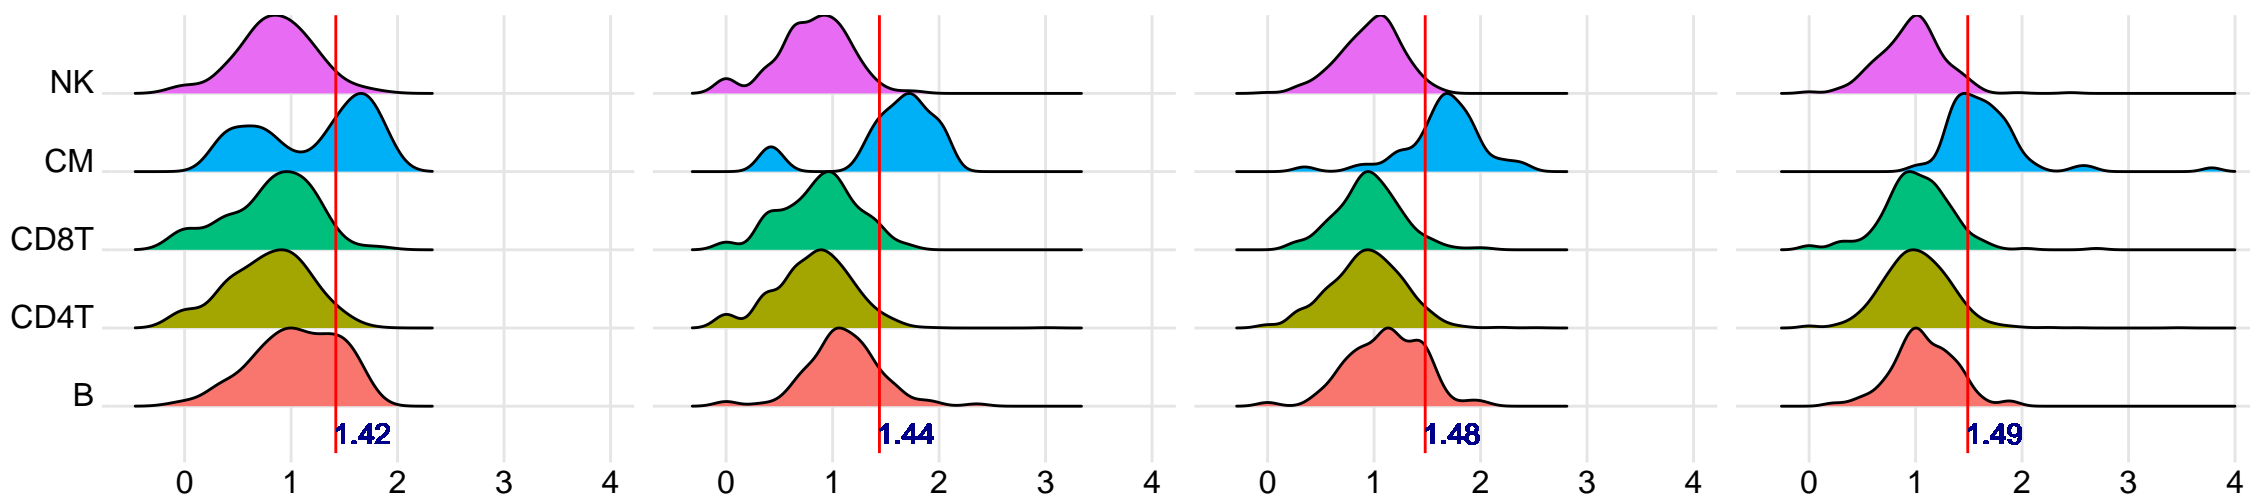**CD11a**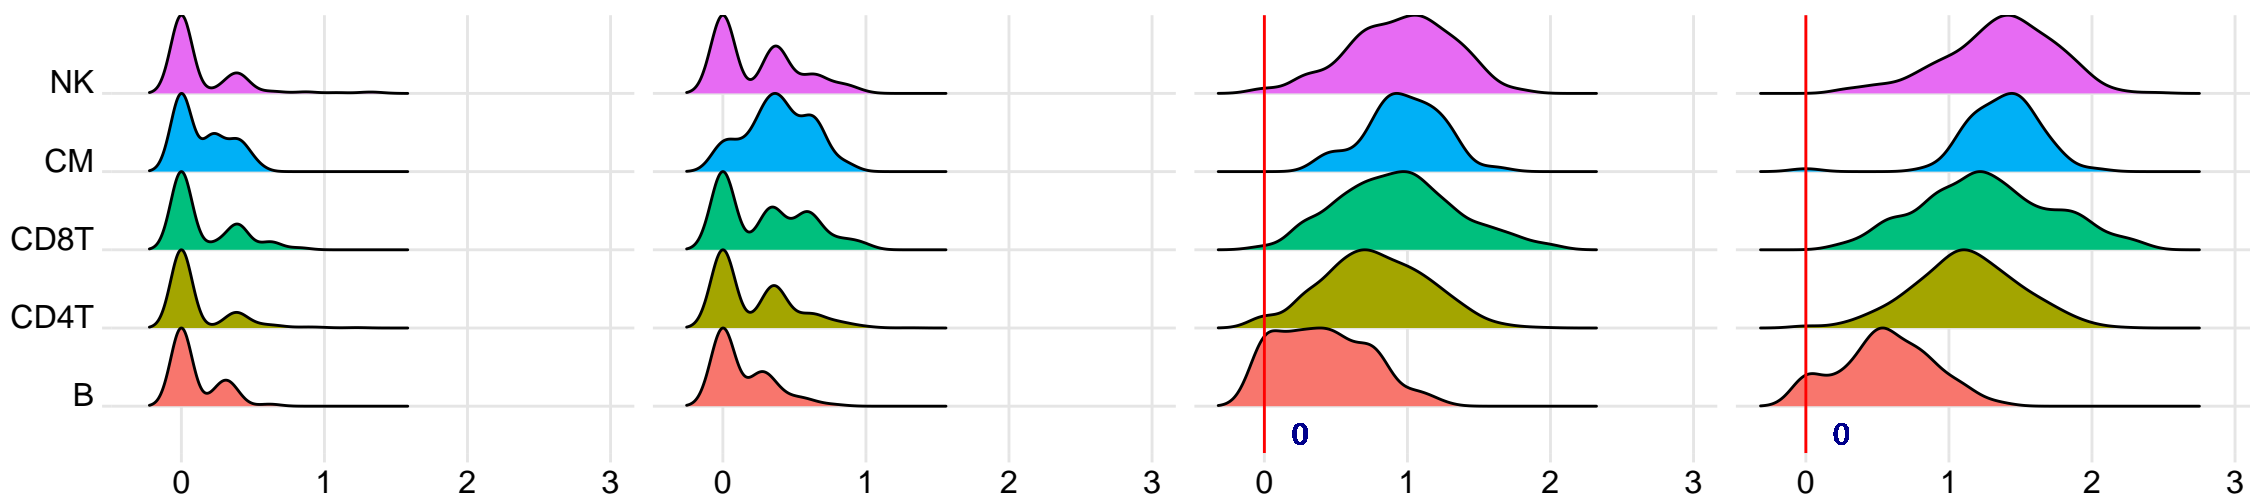**CD11b**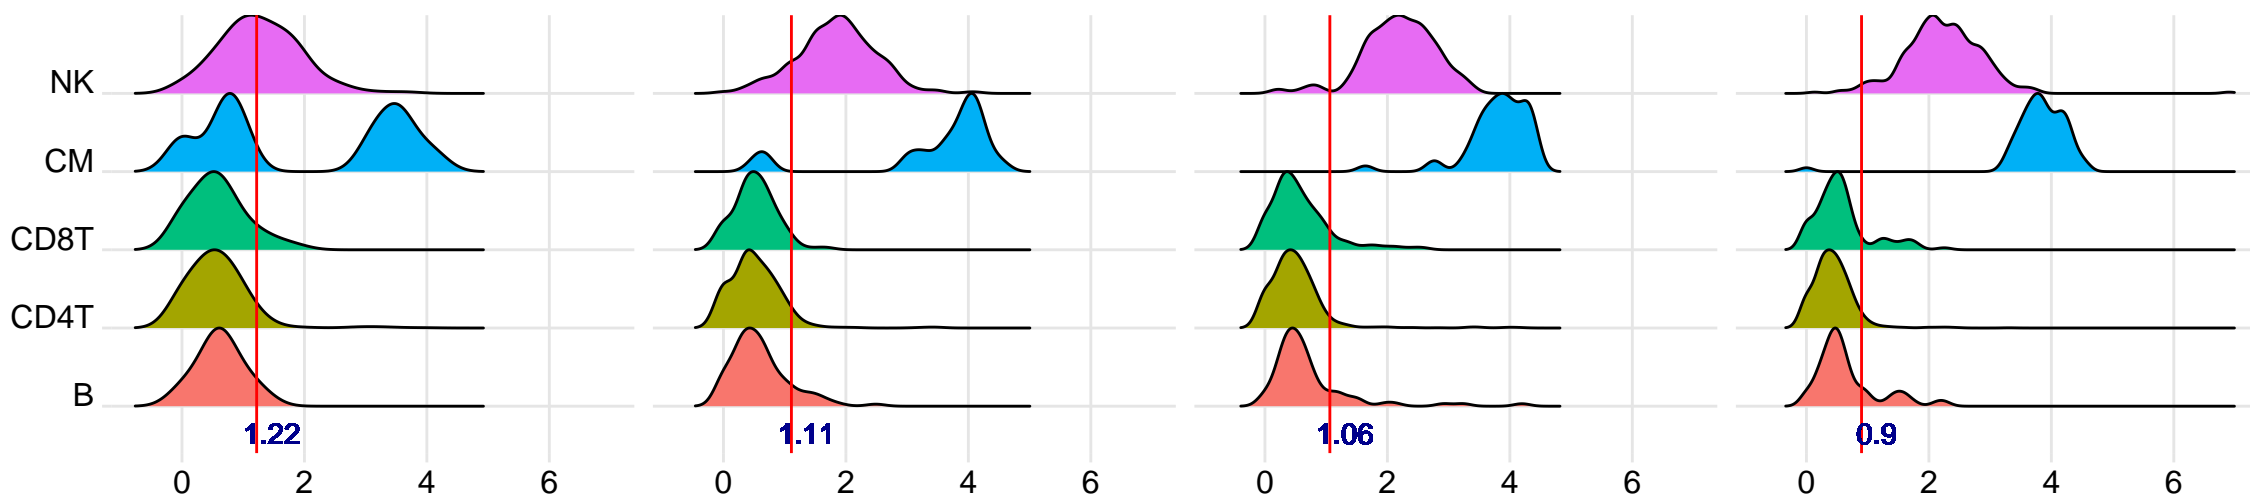

**CD11c**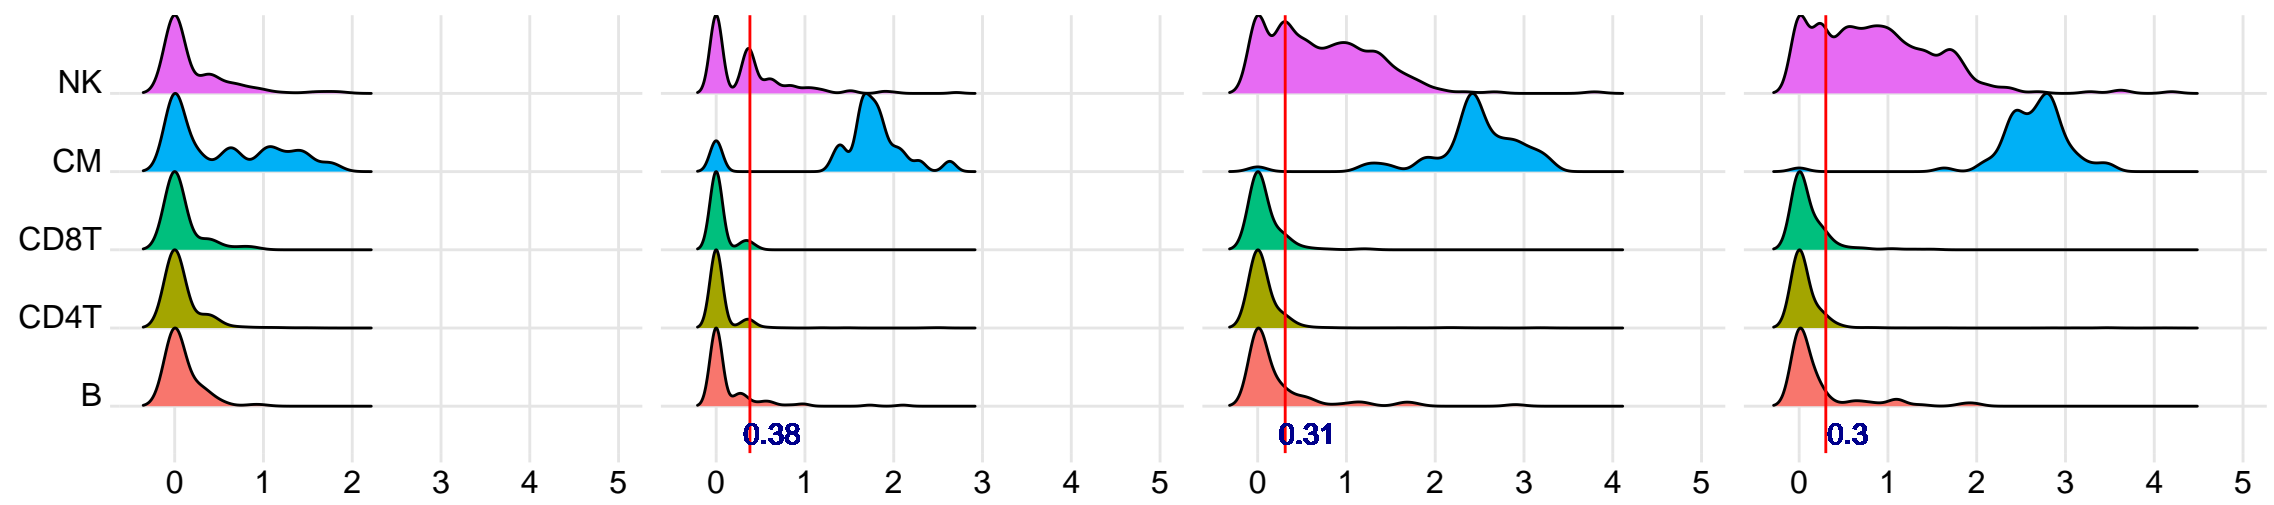**CD122**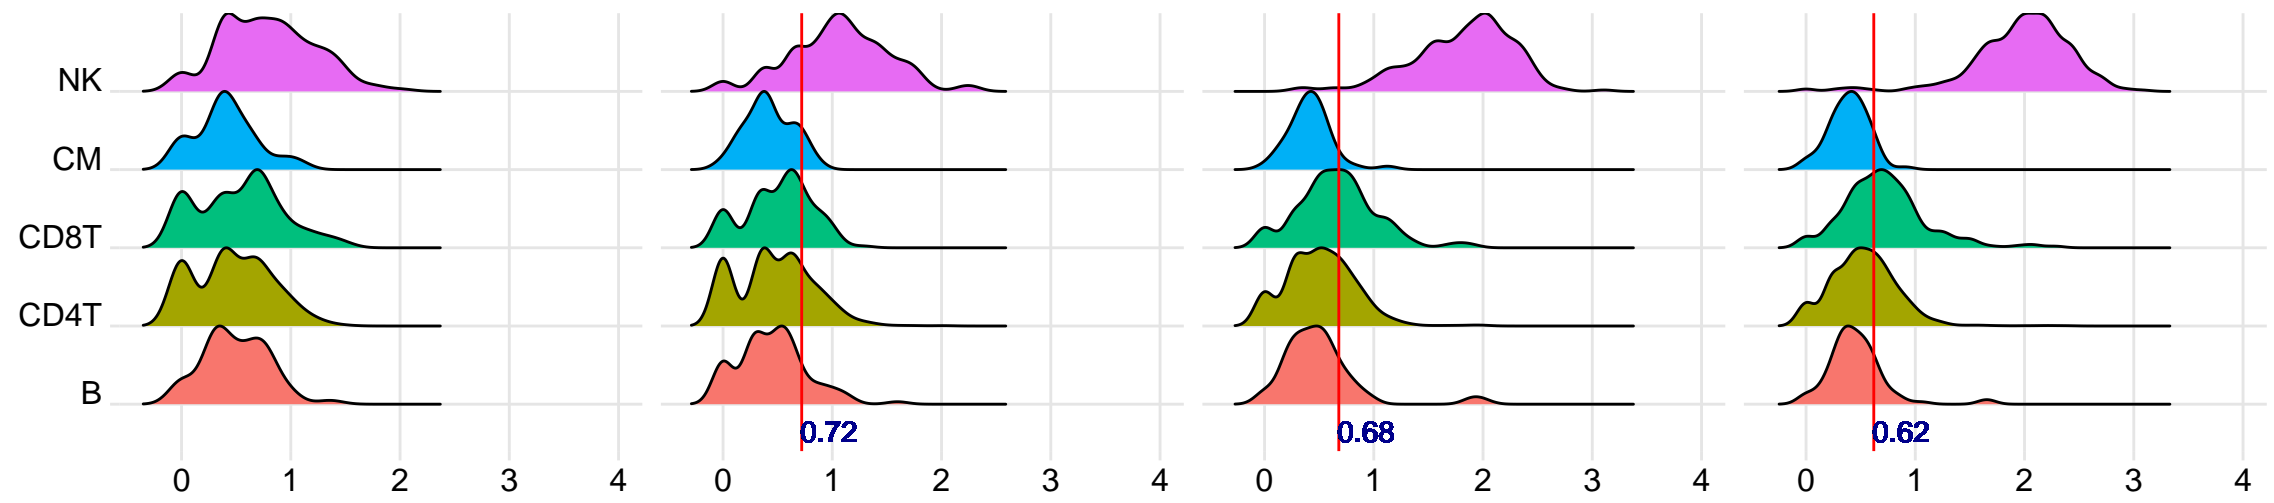**CD123**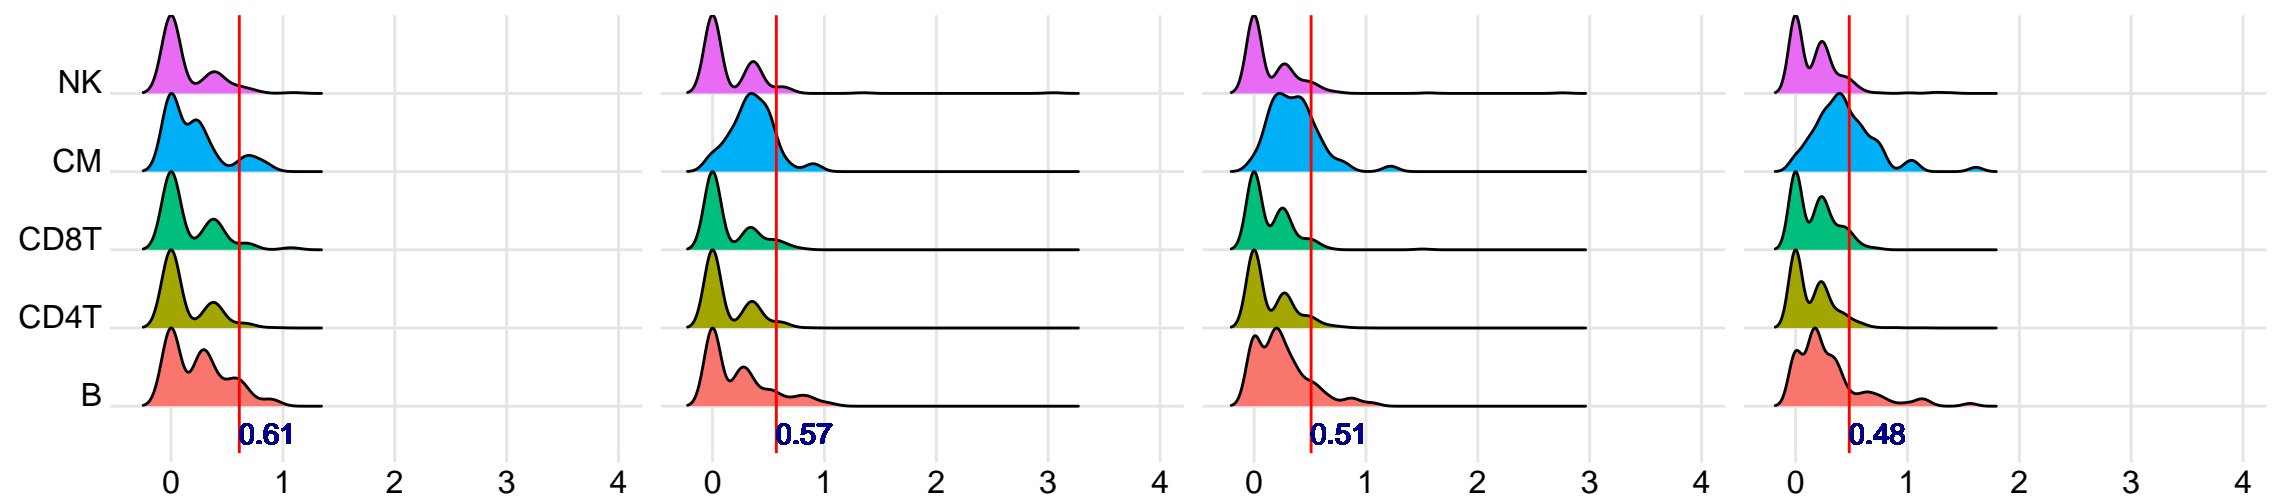**CD127**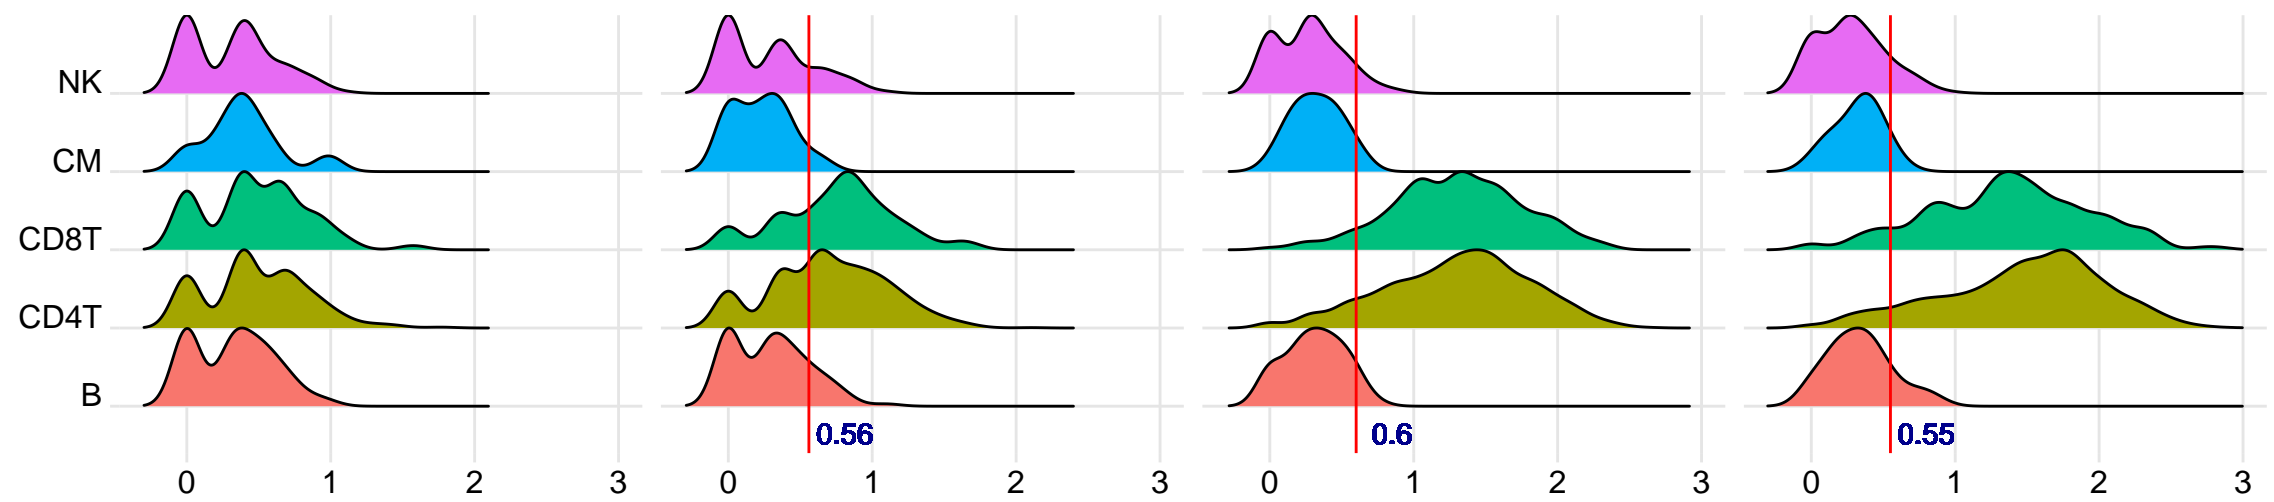**CD137**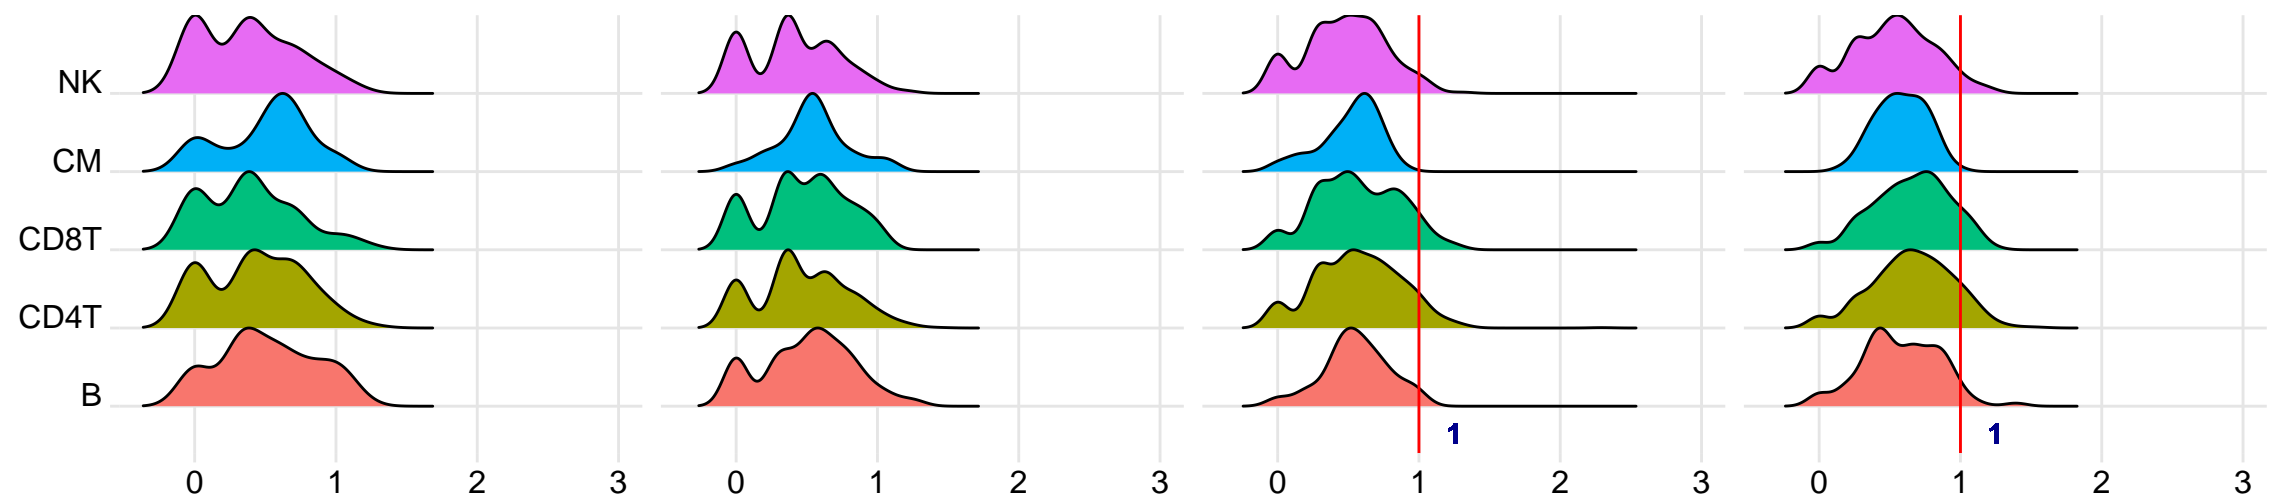

**CD14**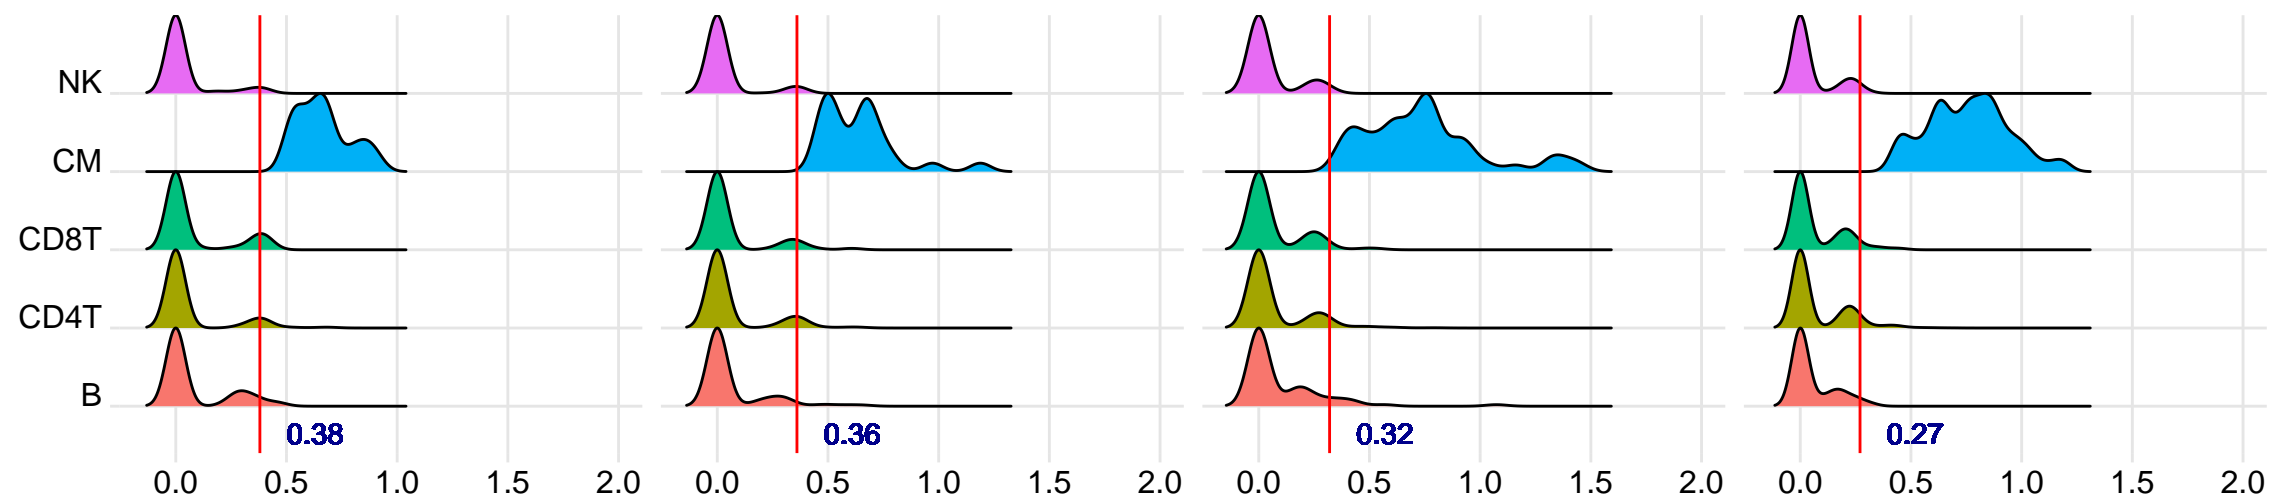**CD141**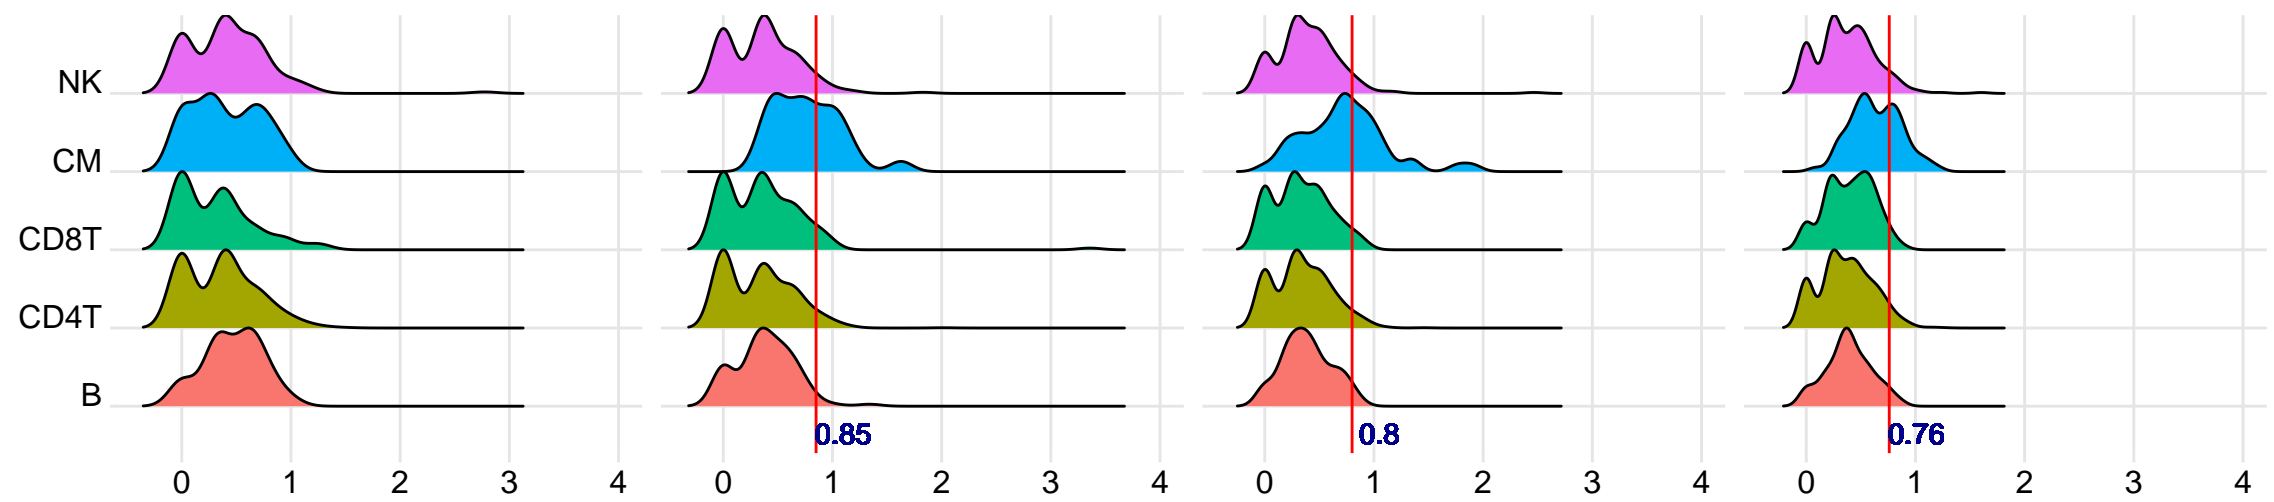**CD15**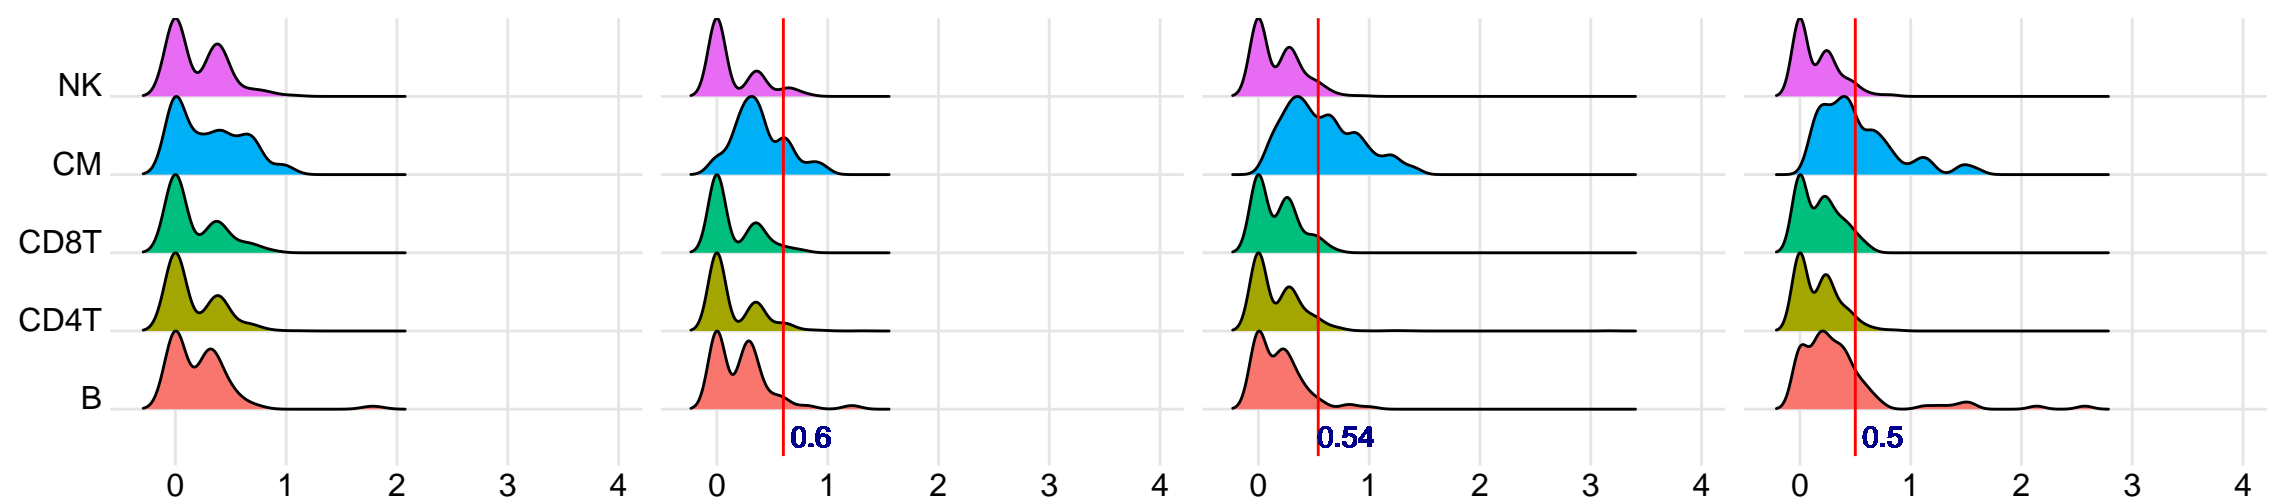**CD150**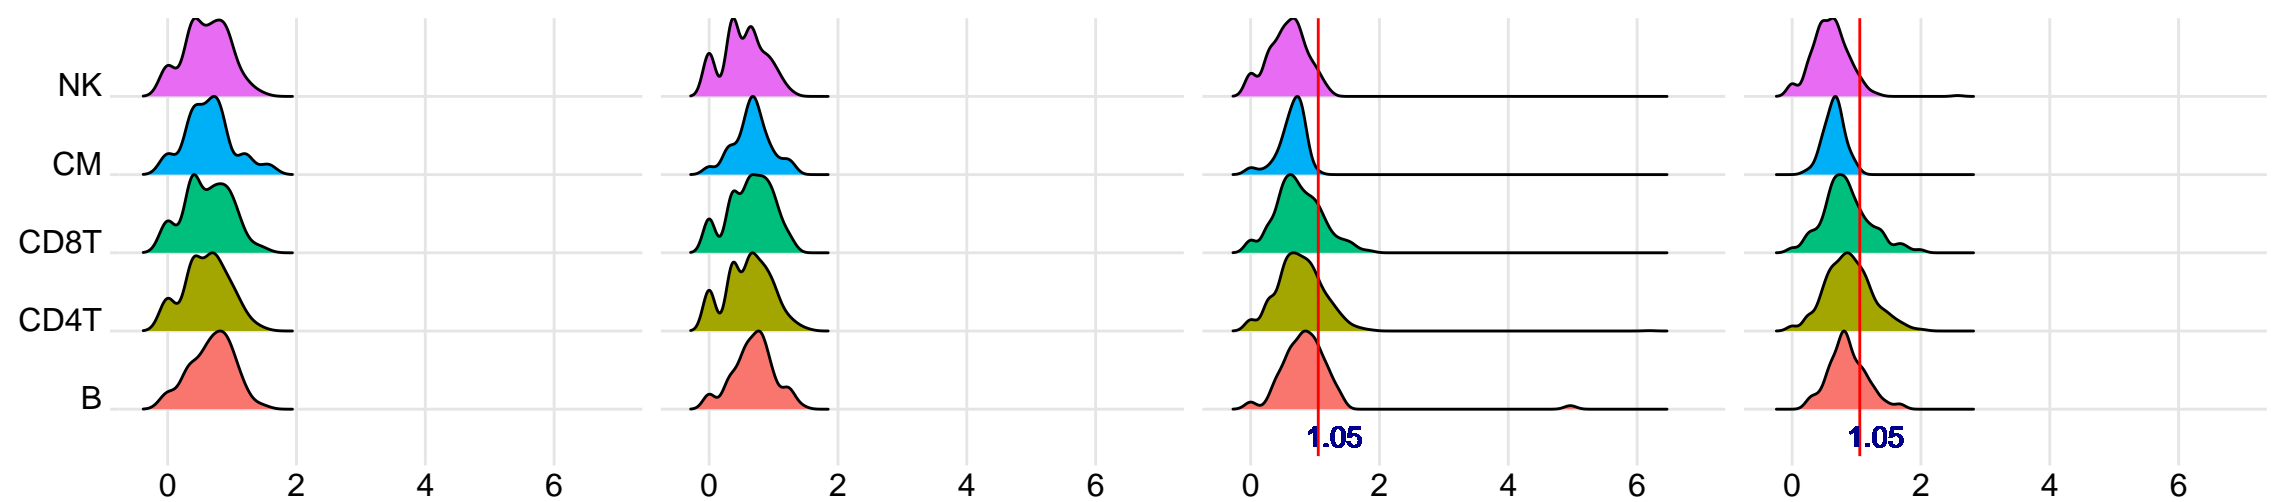**CD154**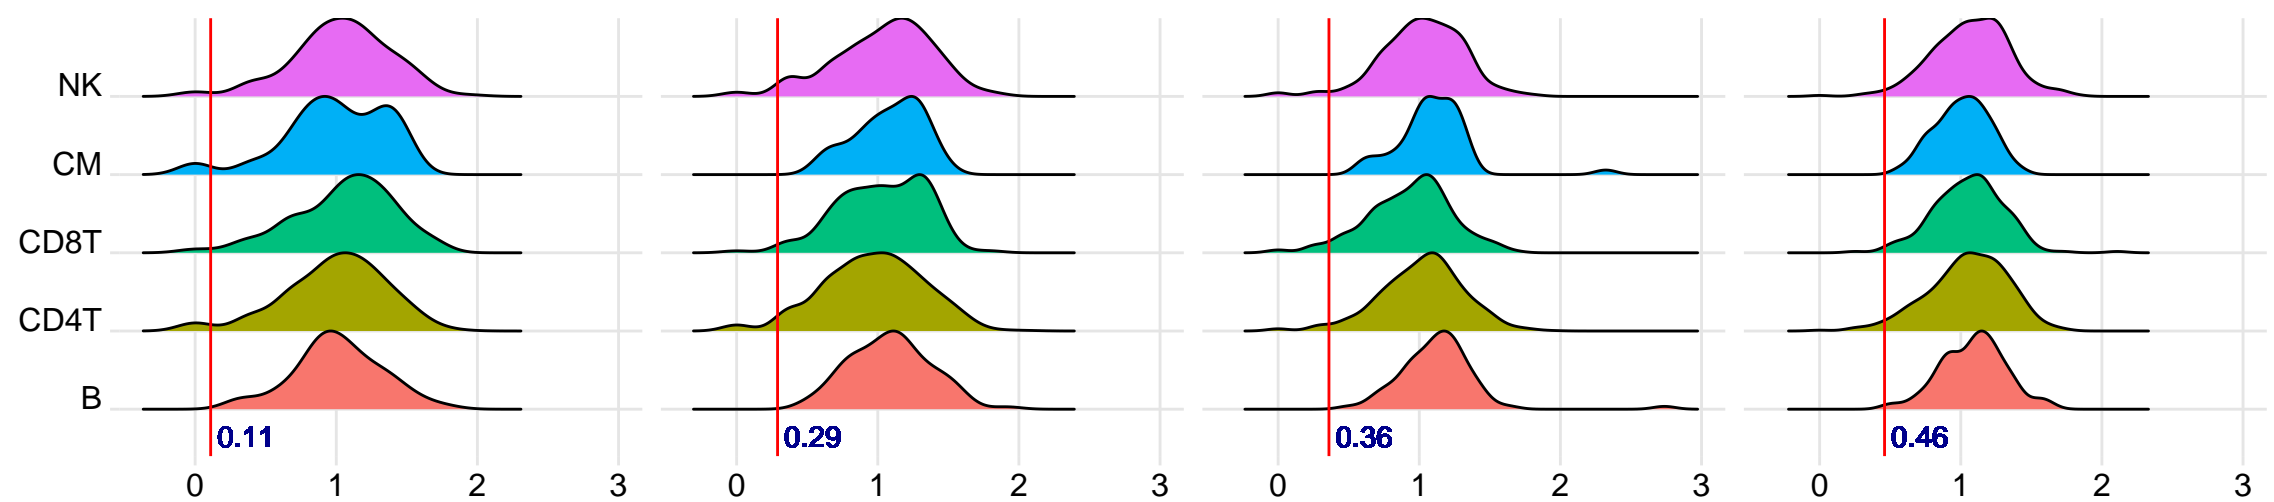

**CD155**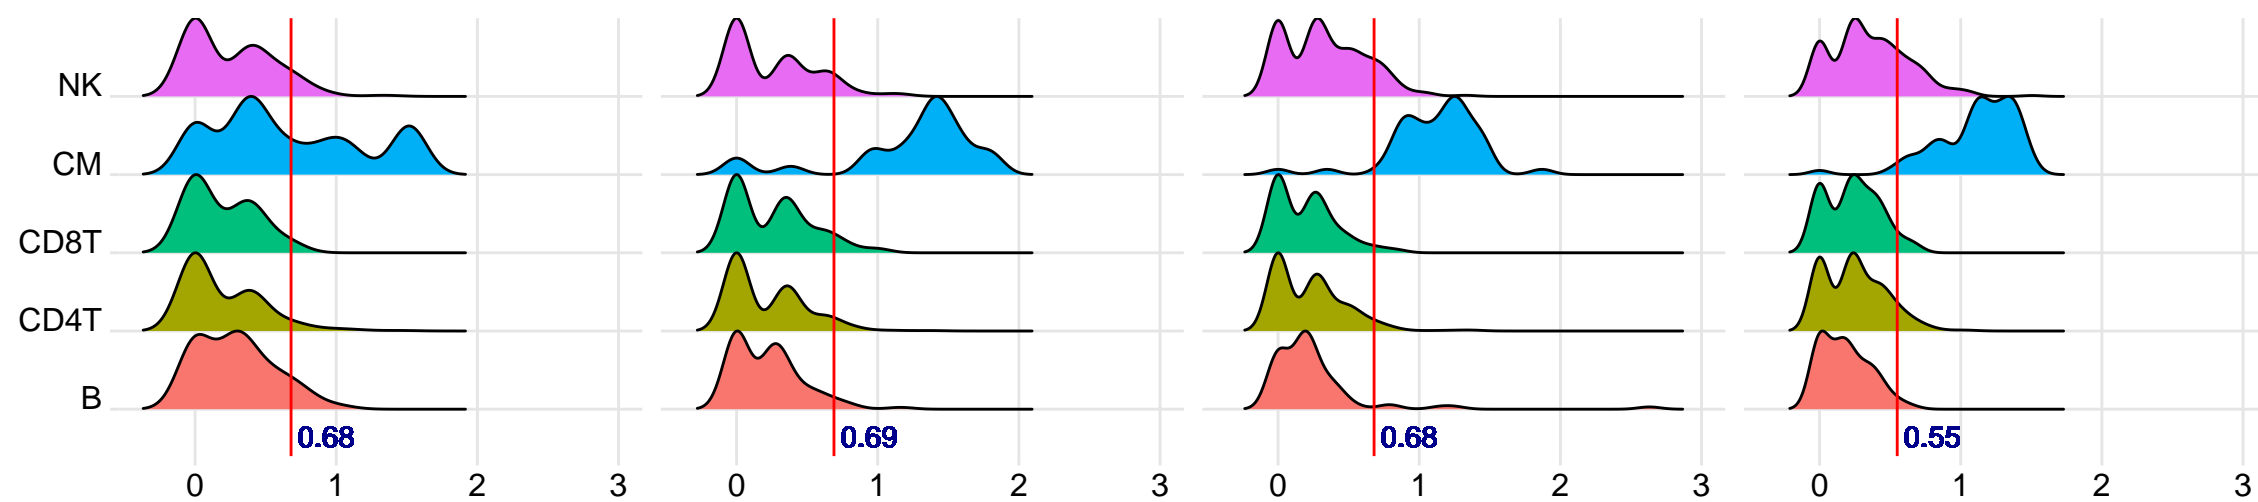**CD158**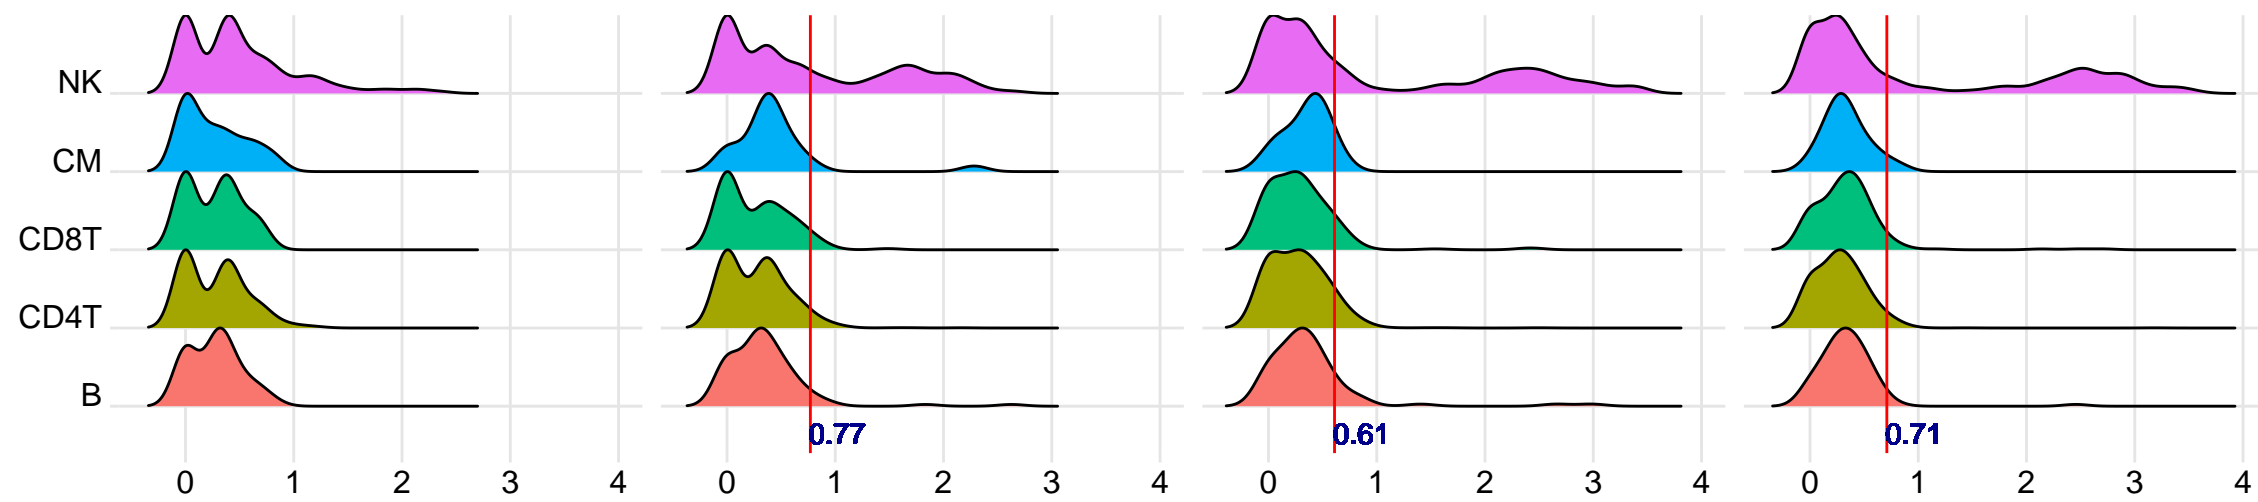**CD158b**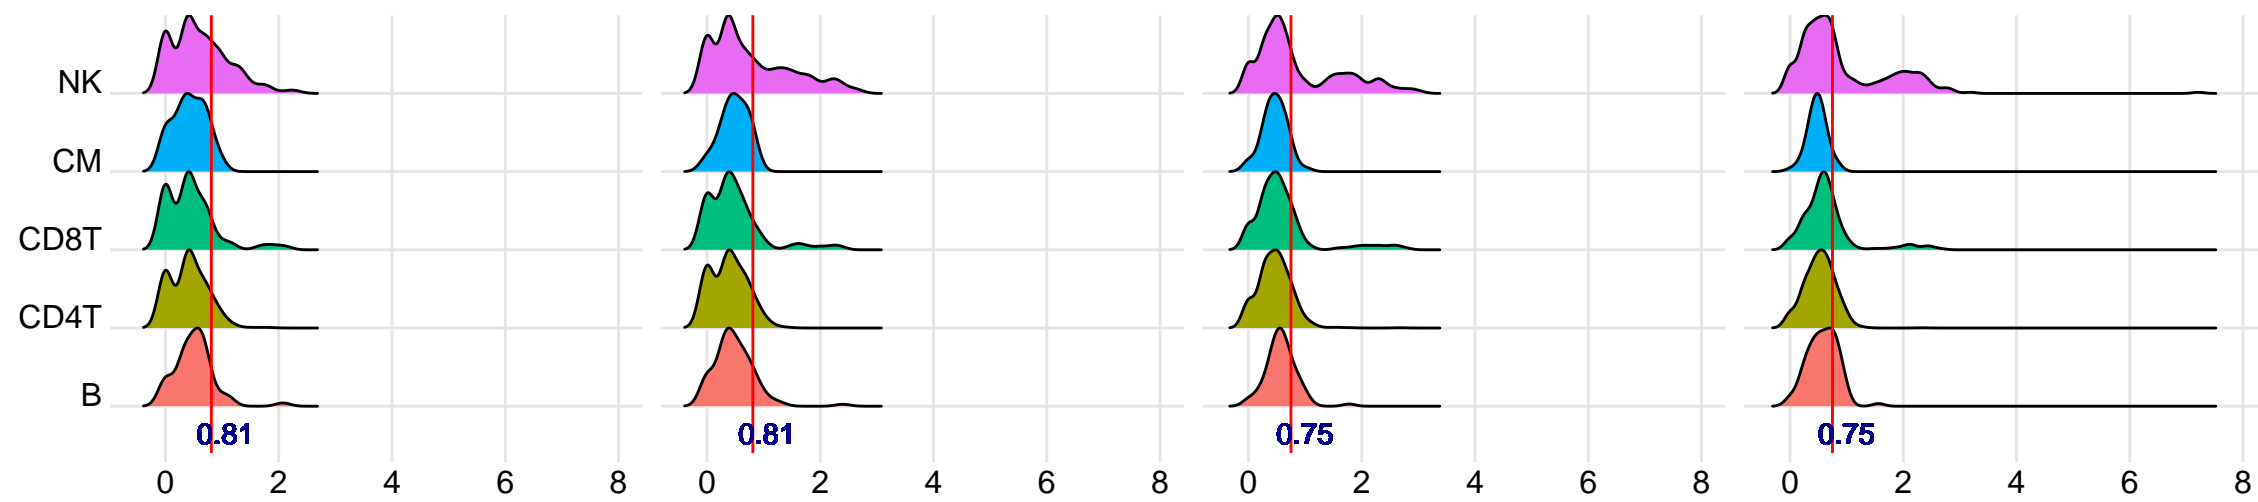**CD158e1**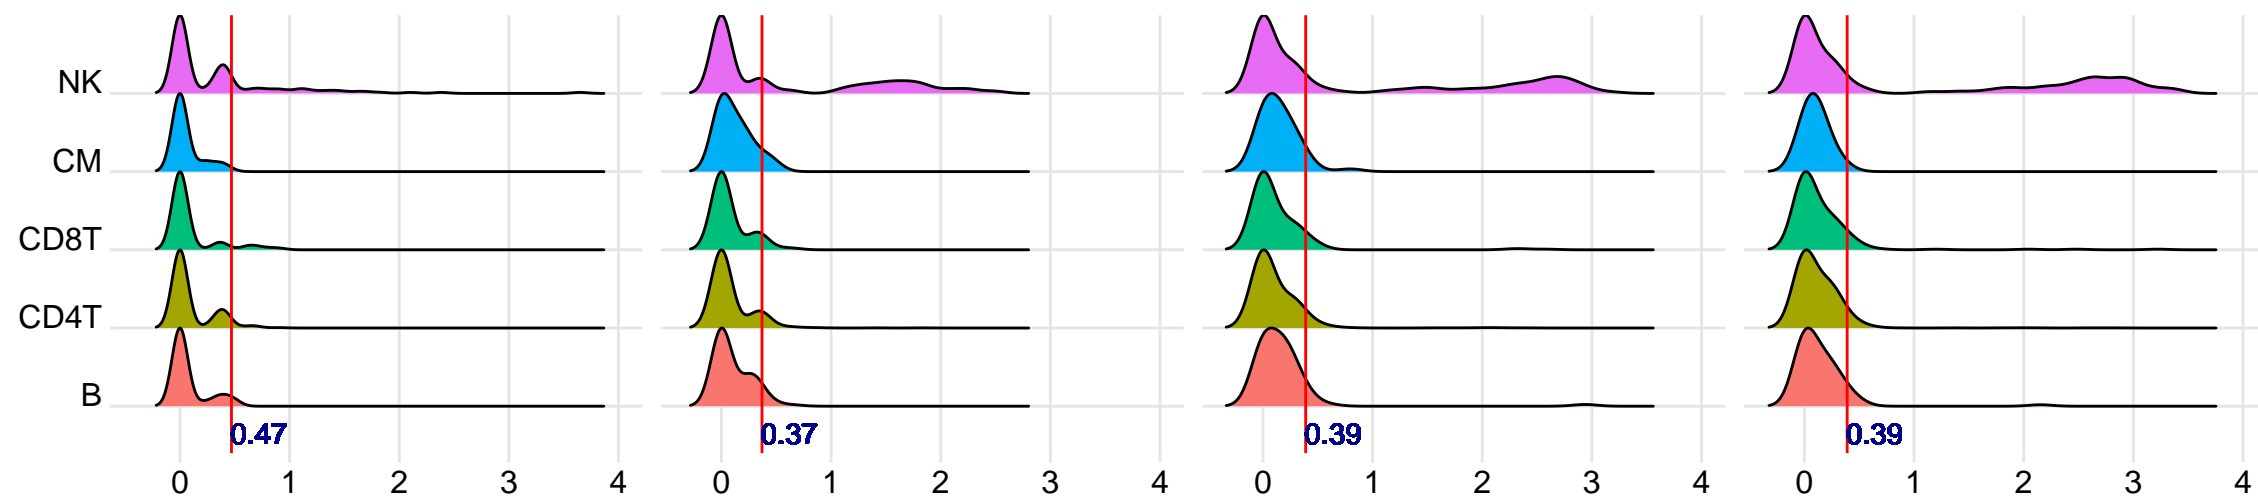**CD158f**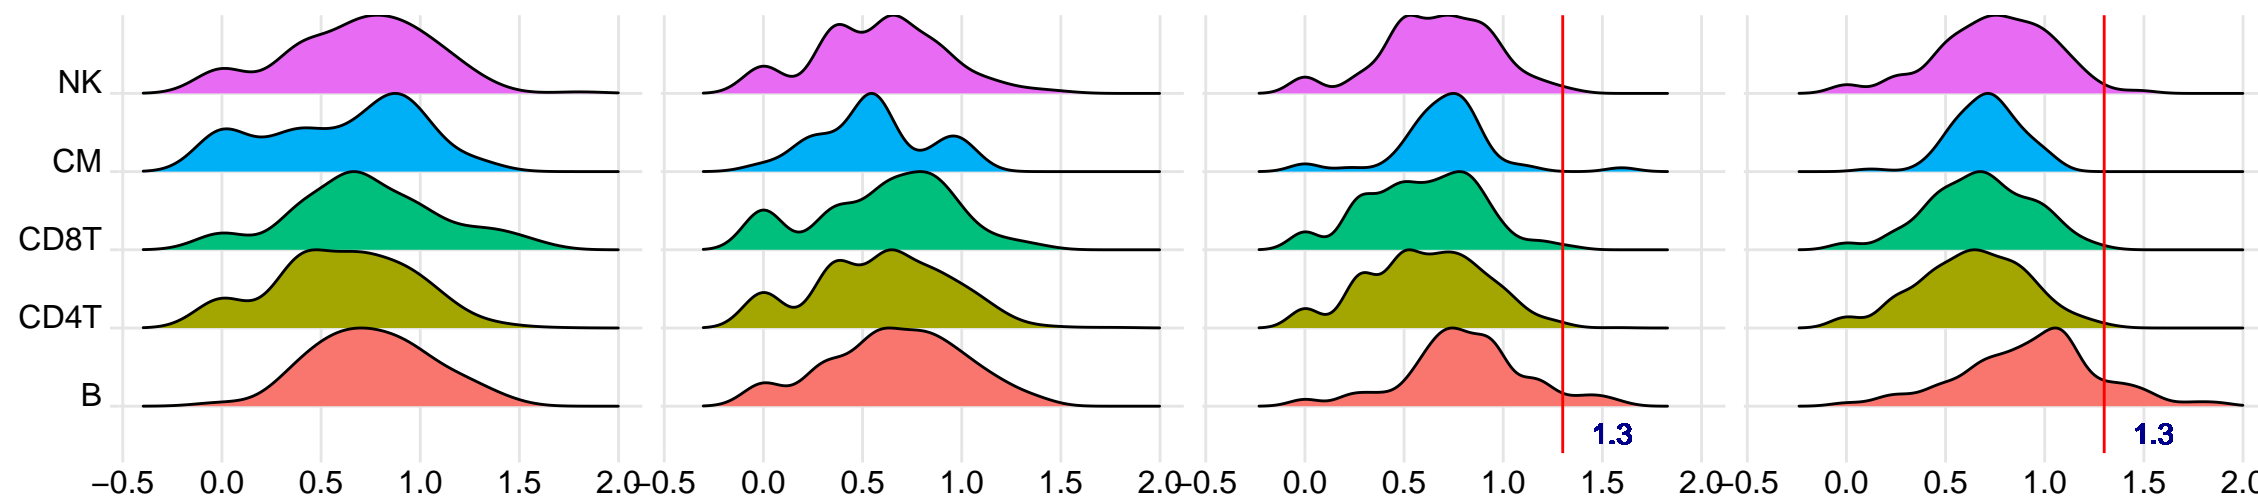



**CD16**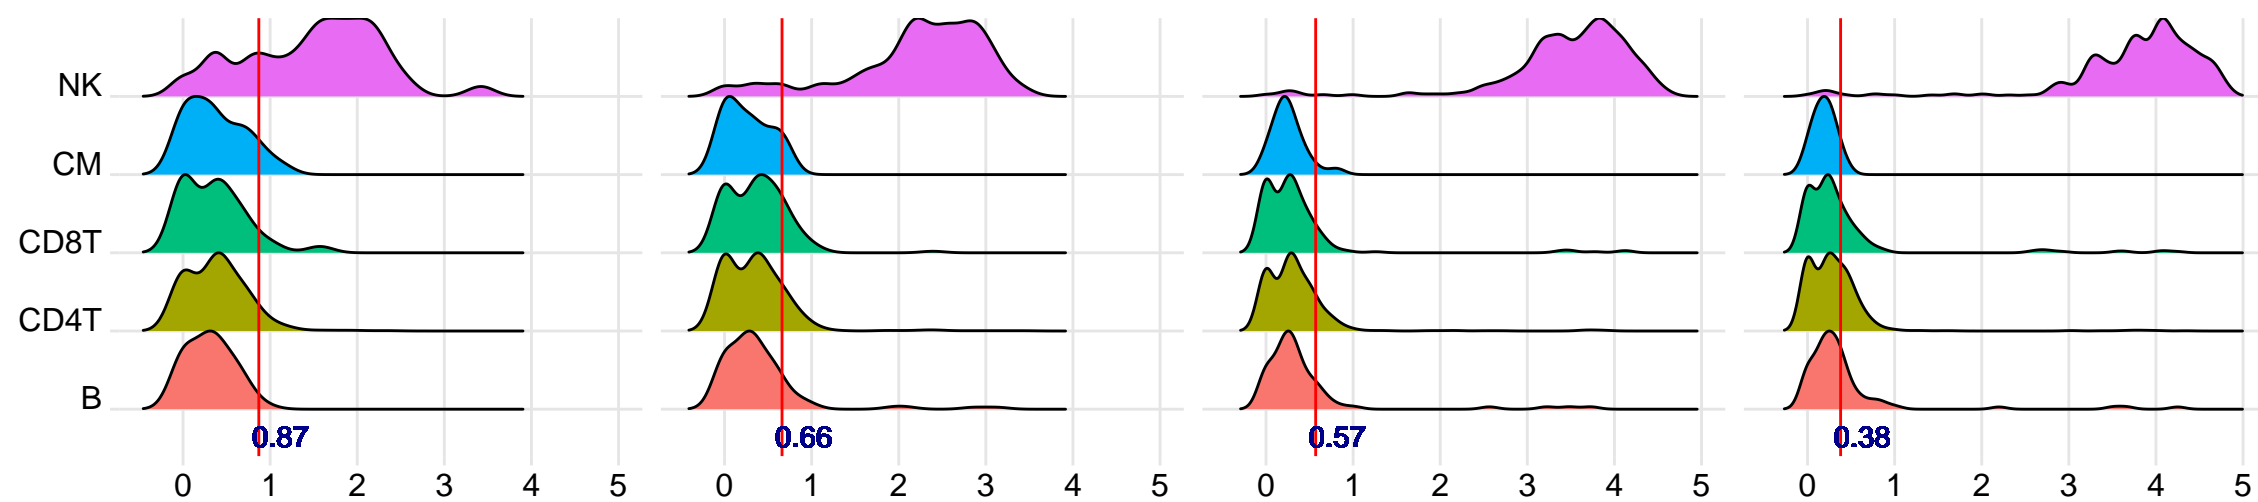**CD161**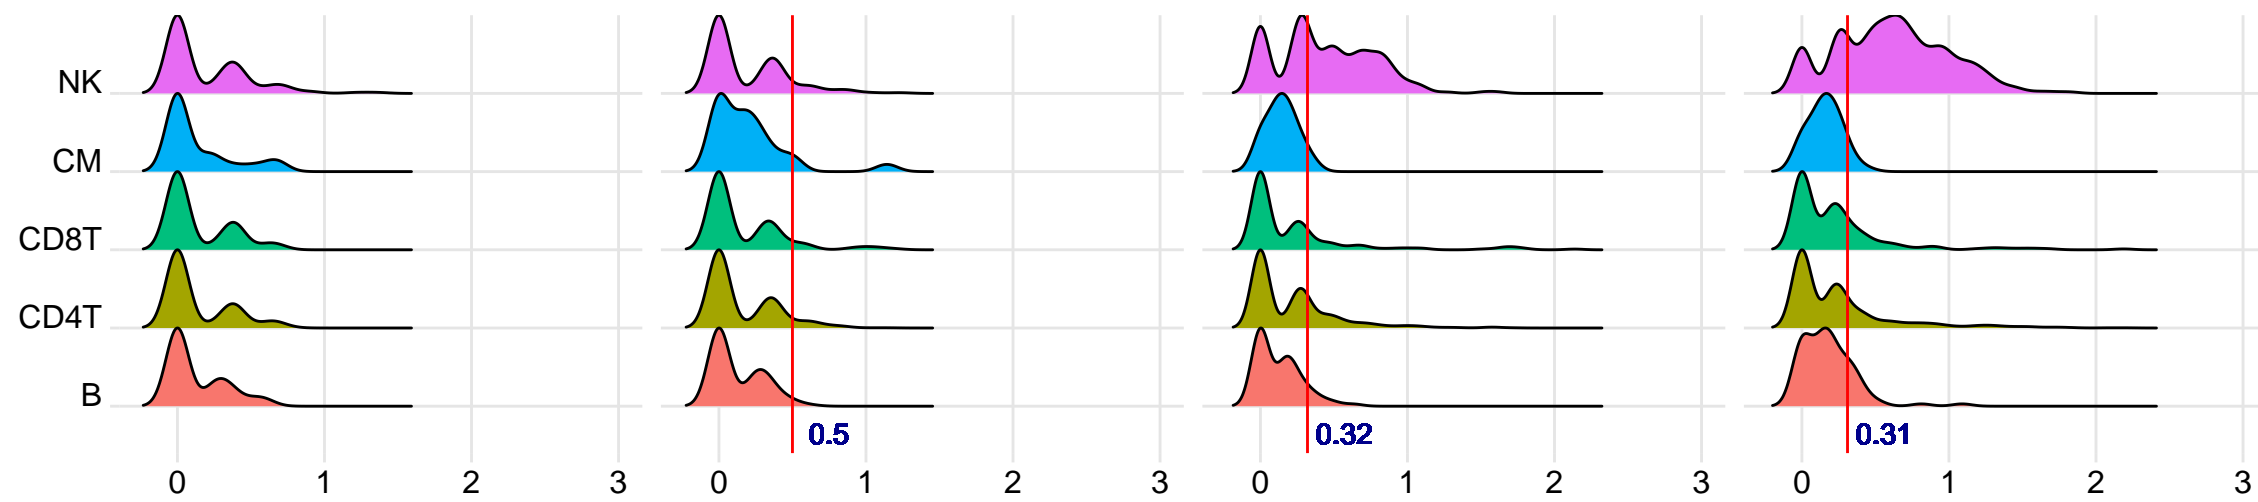**CD163**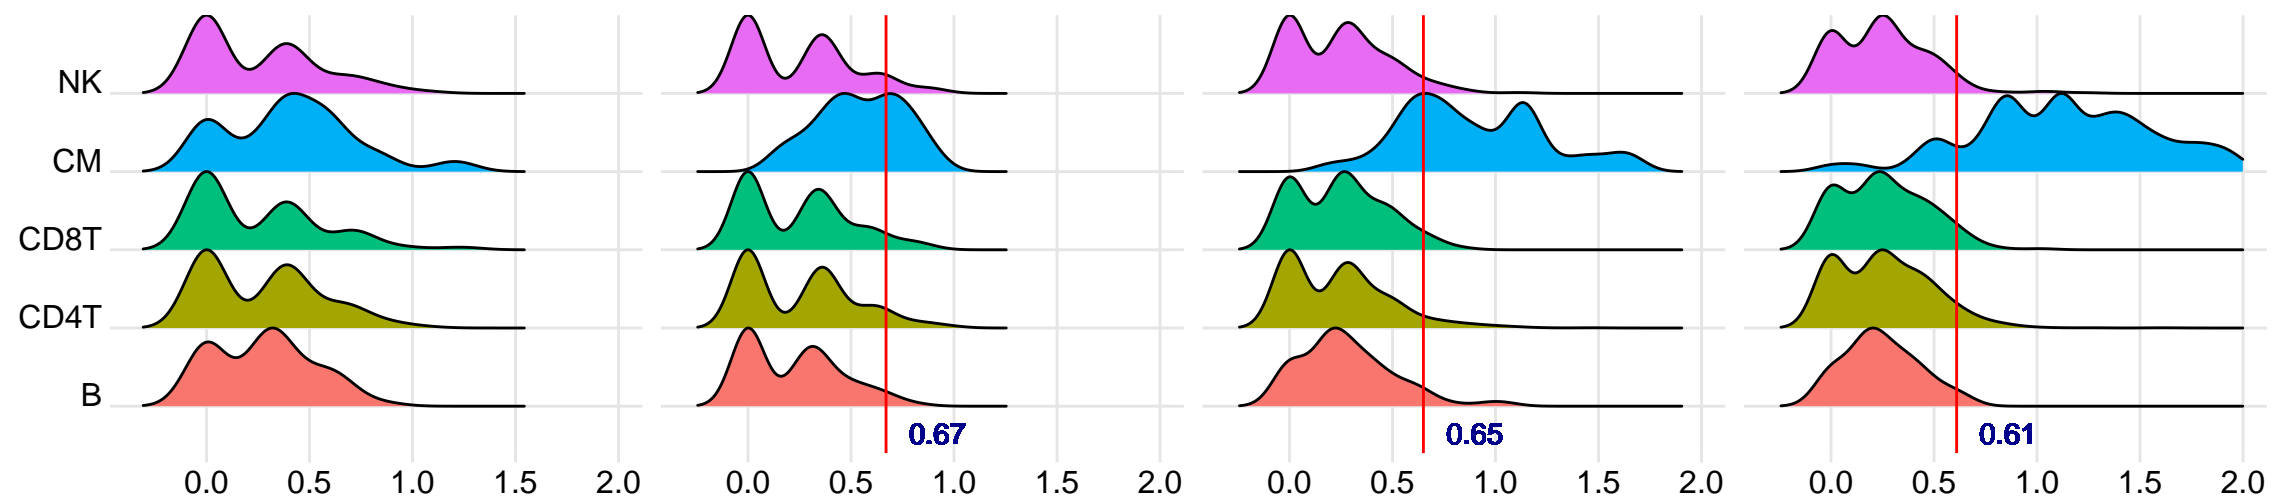**CD18**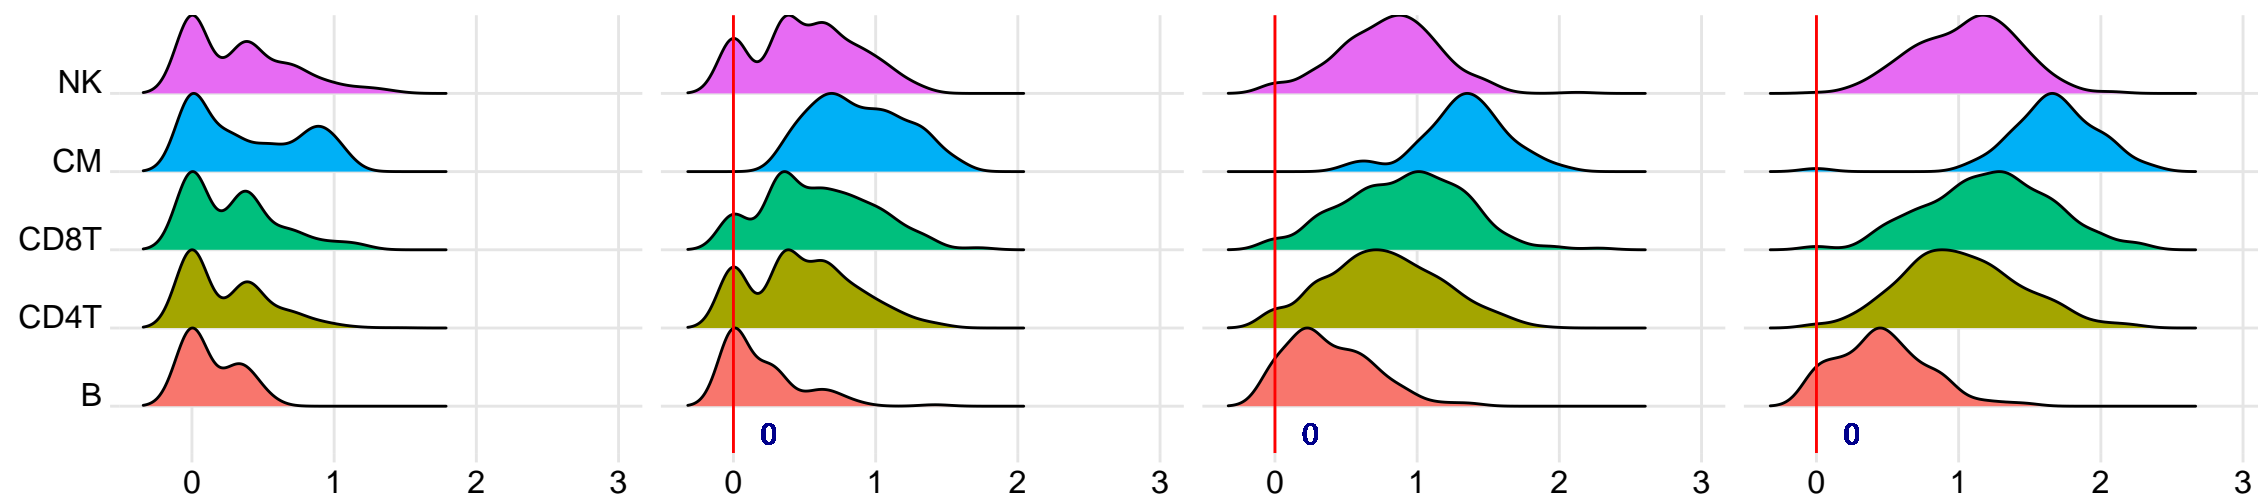**CD183**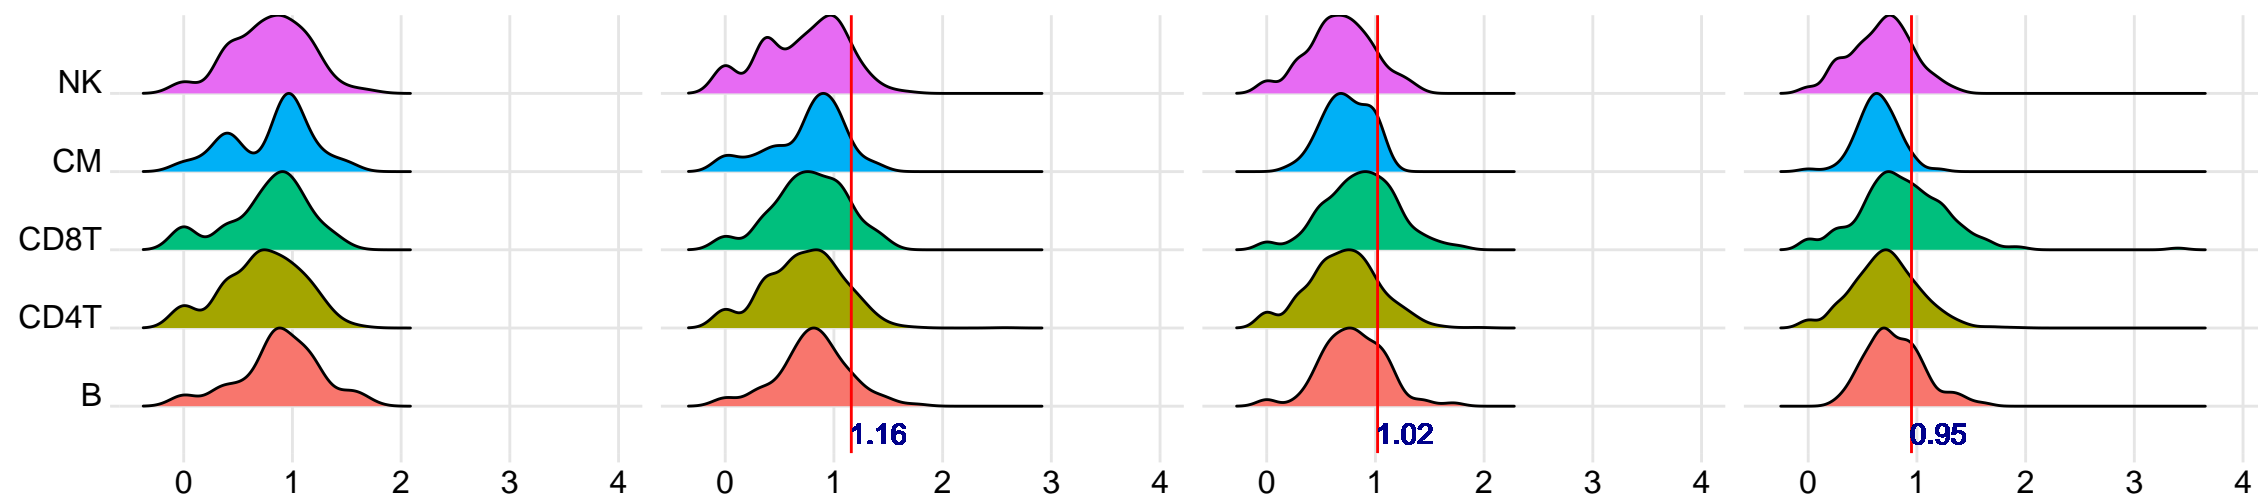

**CD185**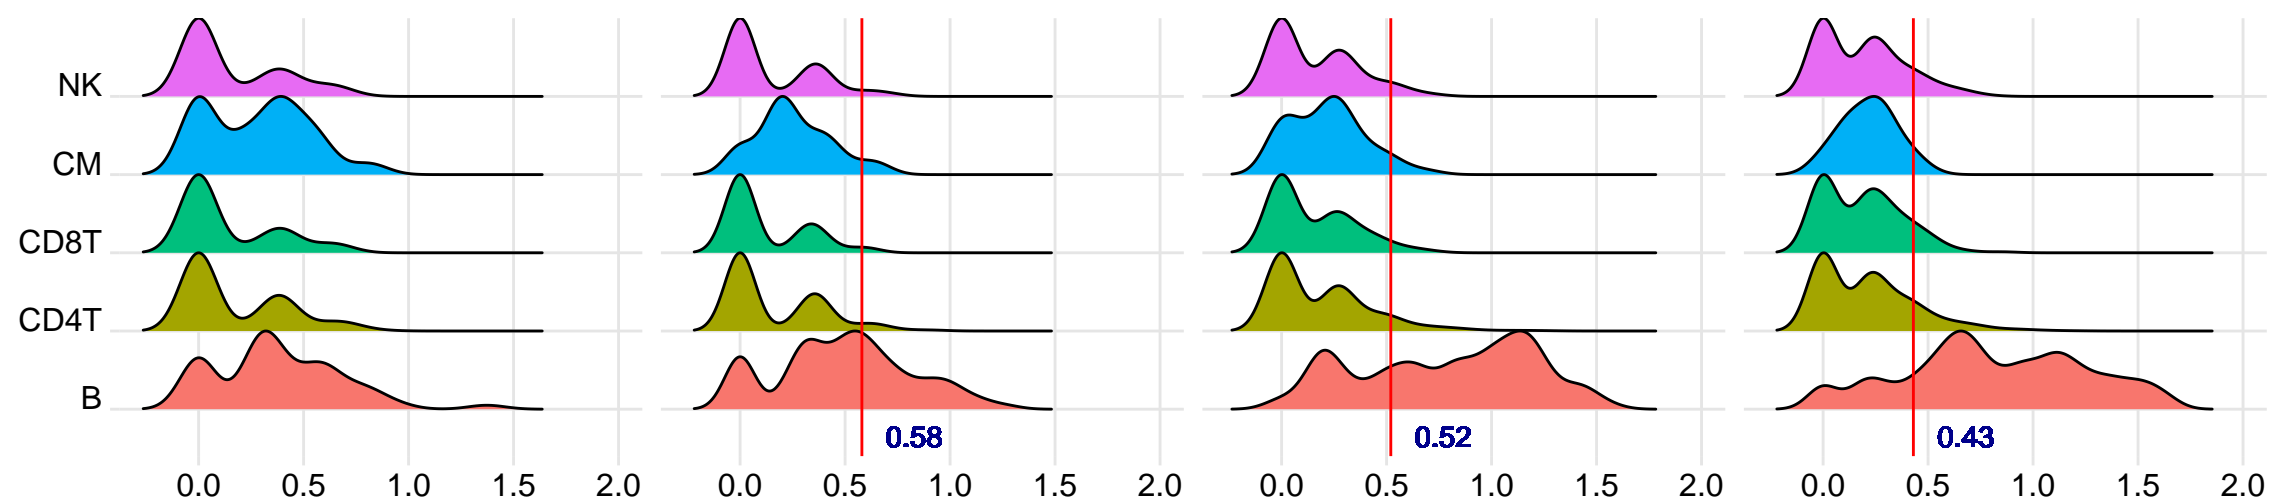**CD19**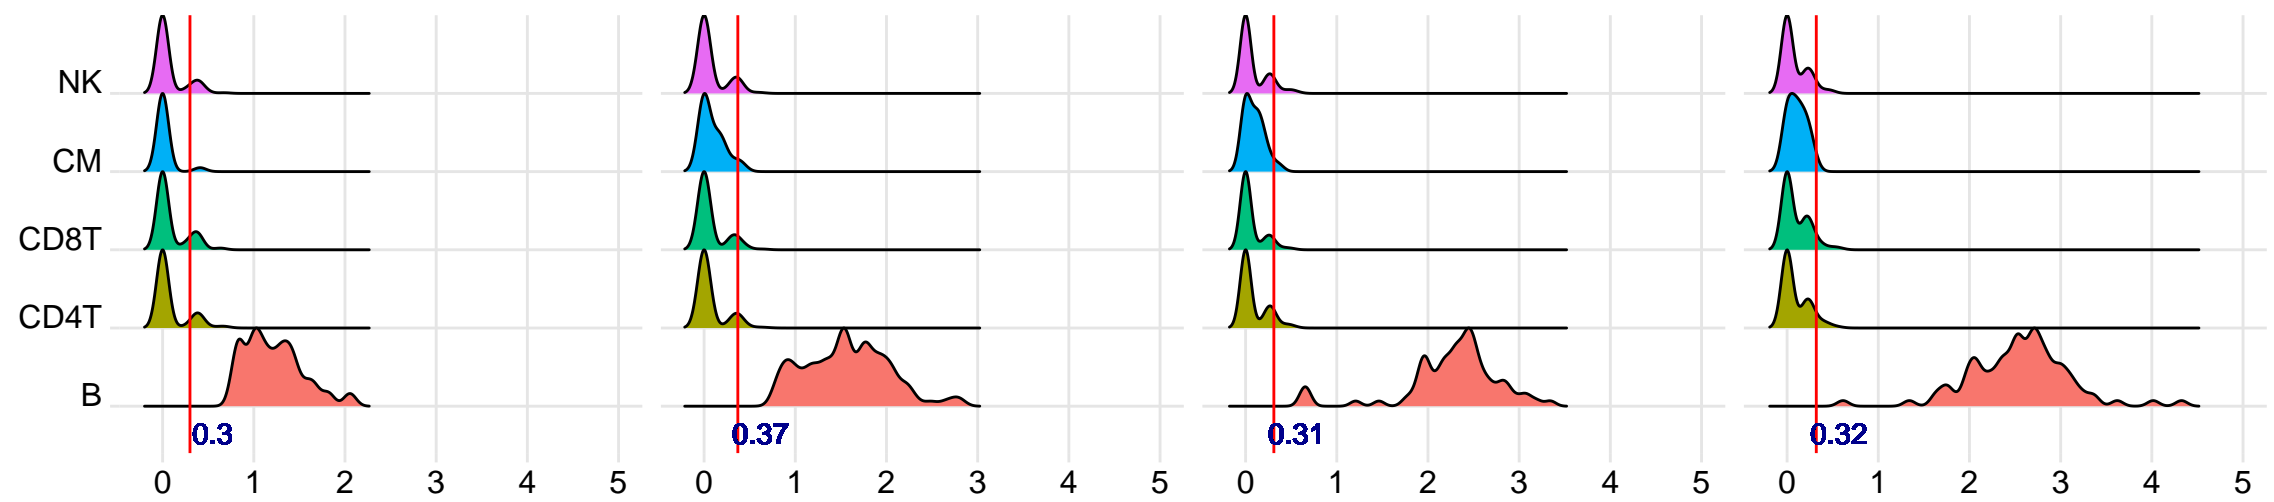**CD194**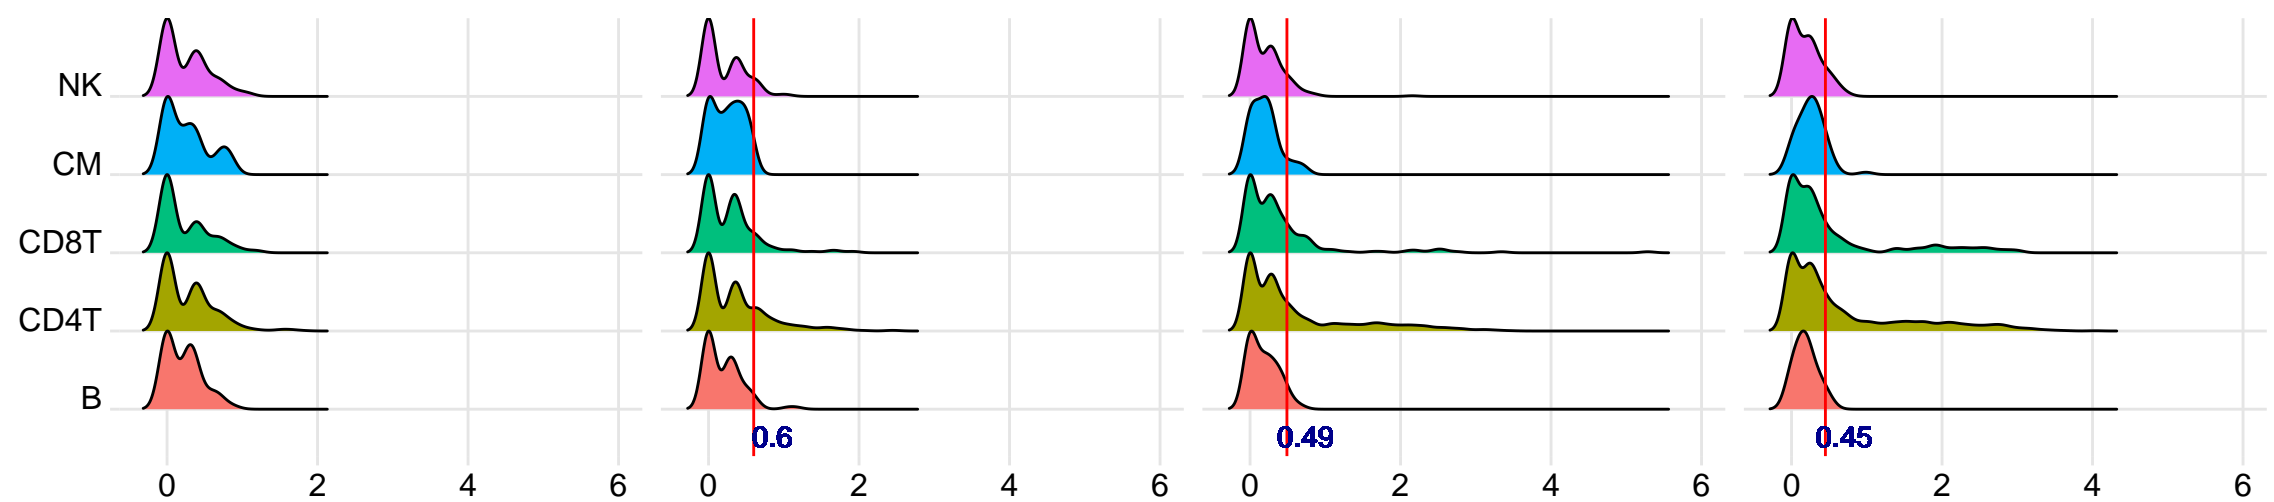**CD195**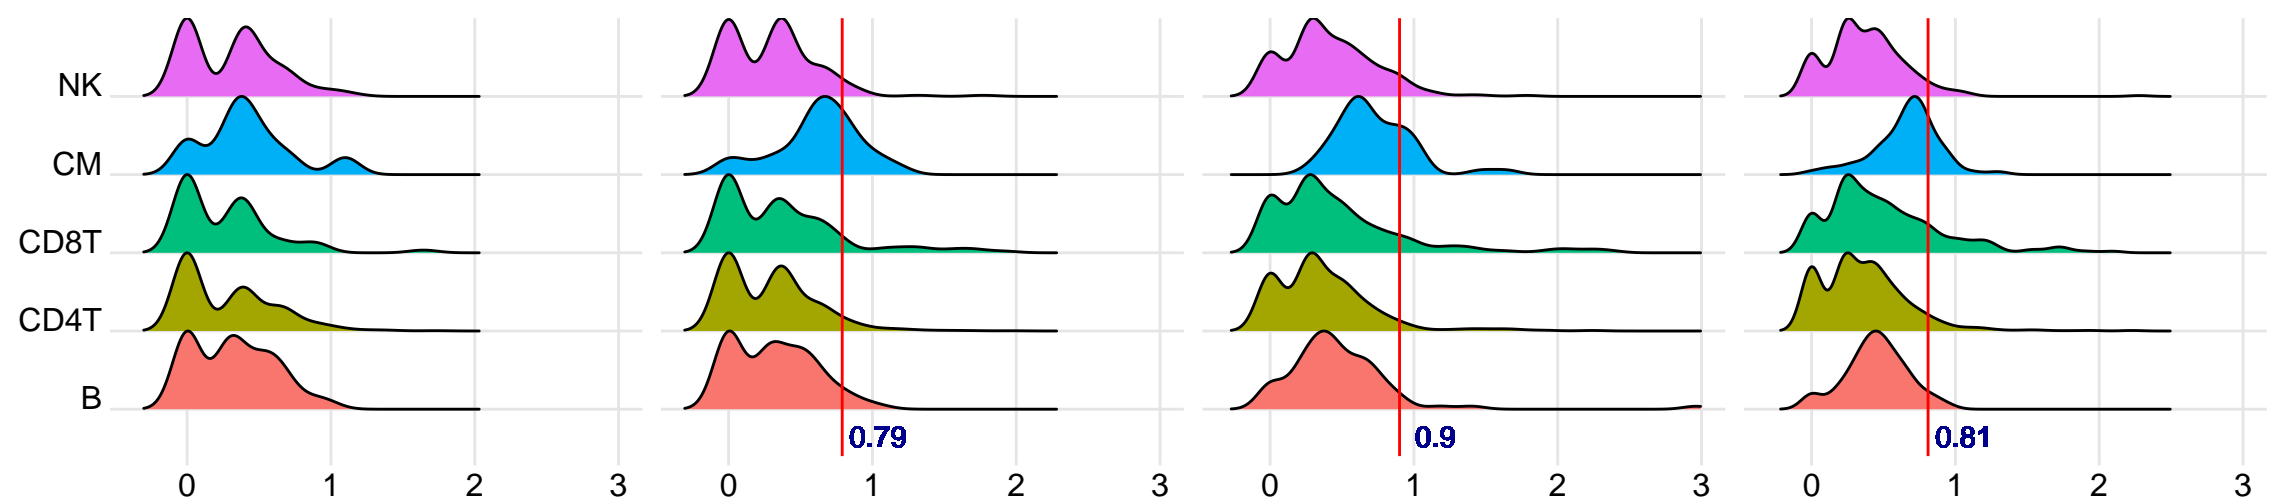**CD196**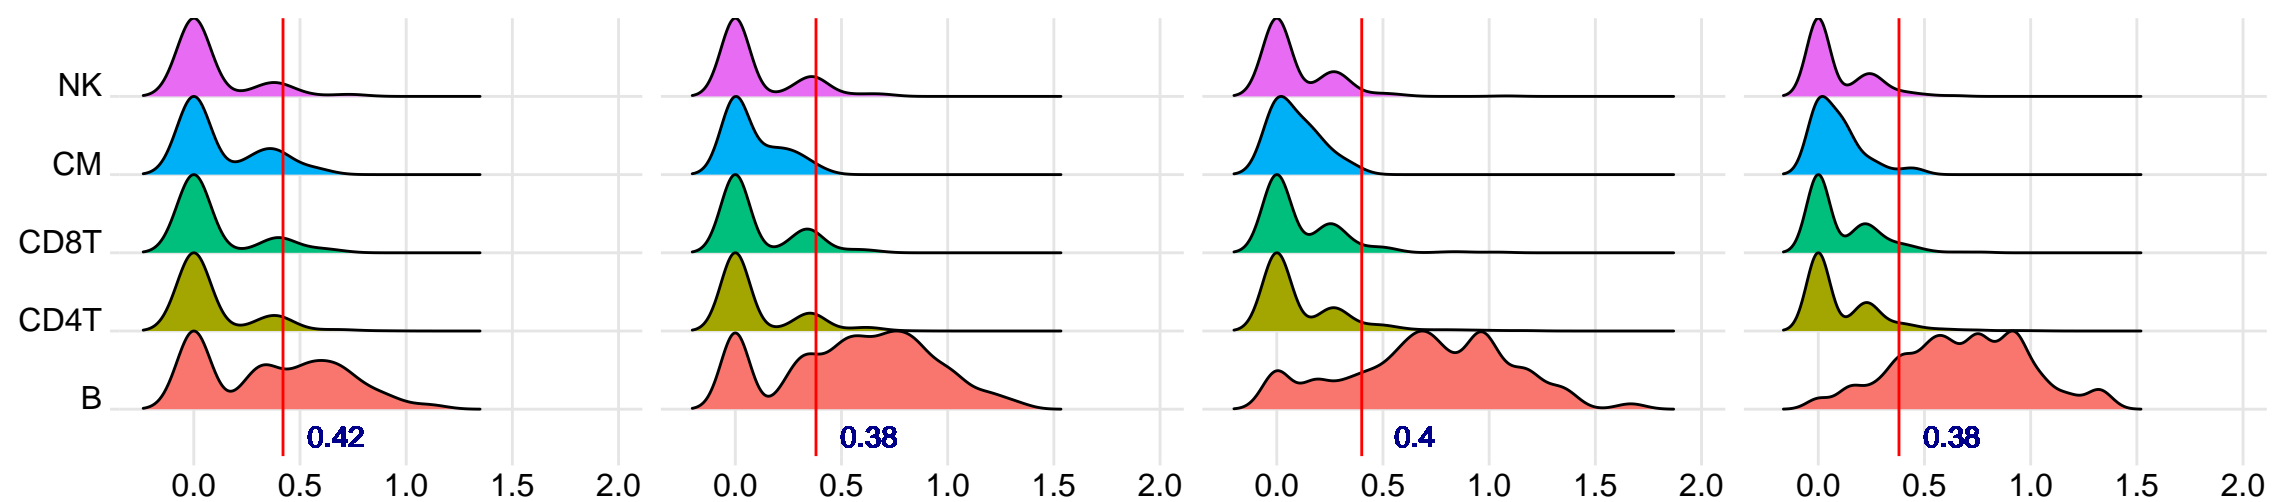

**CD197**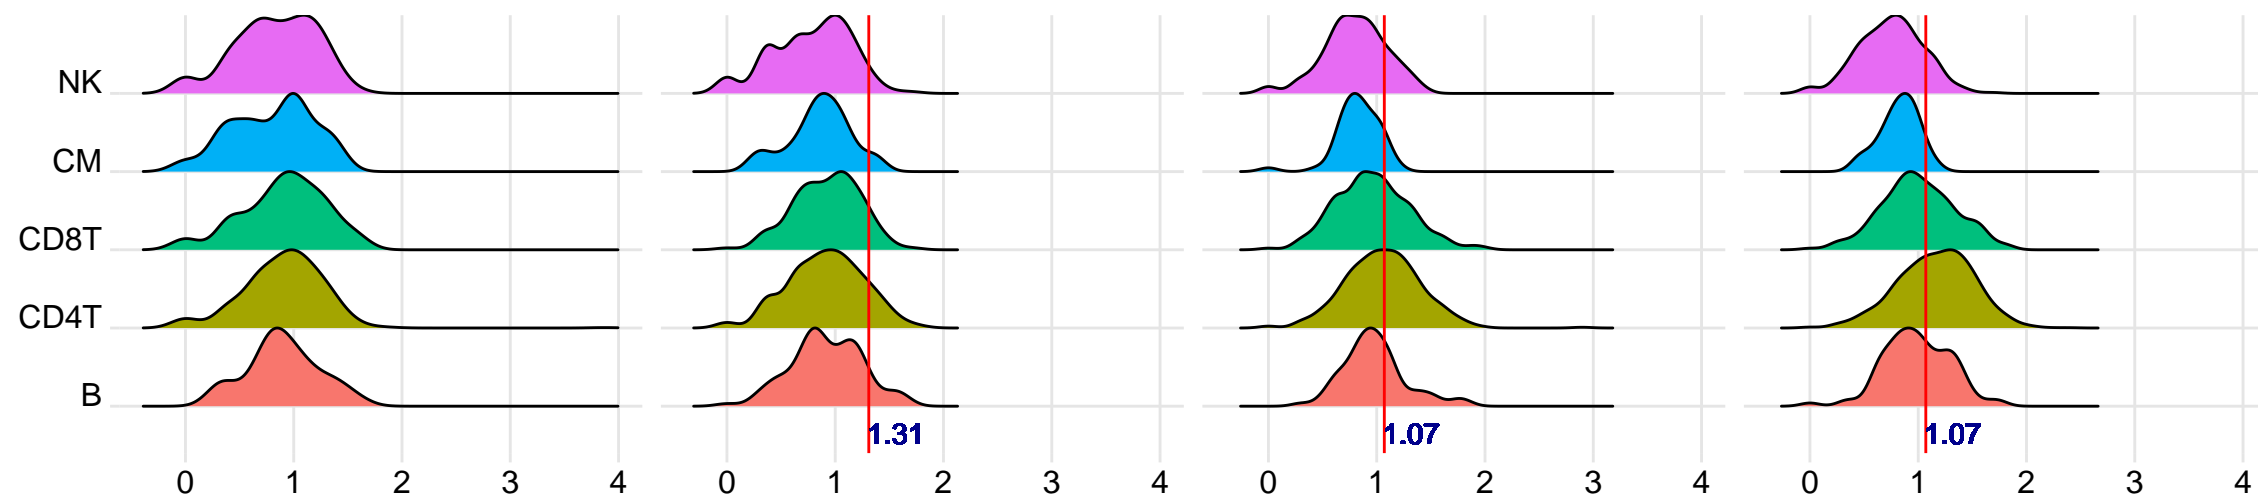**CD1c**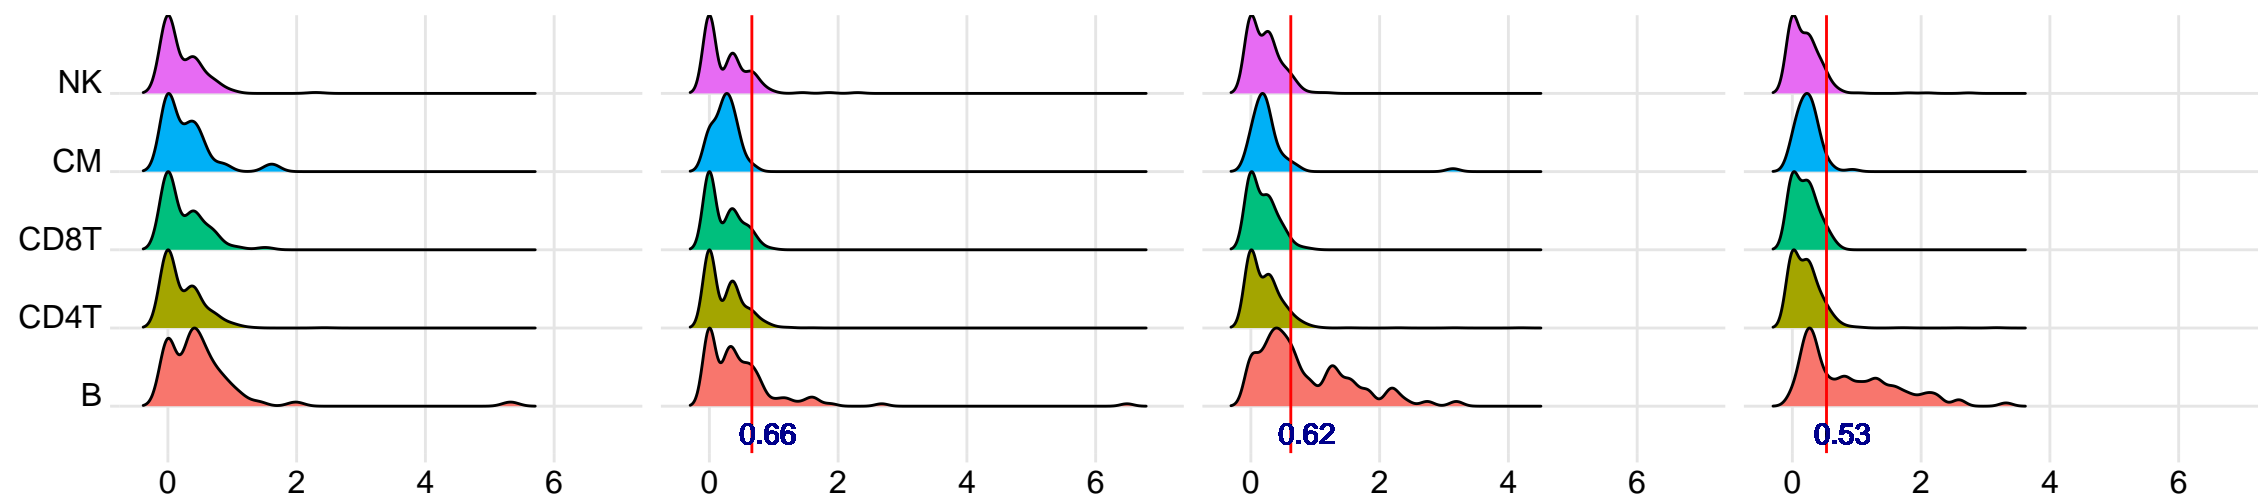**CD1d**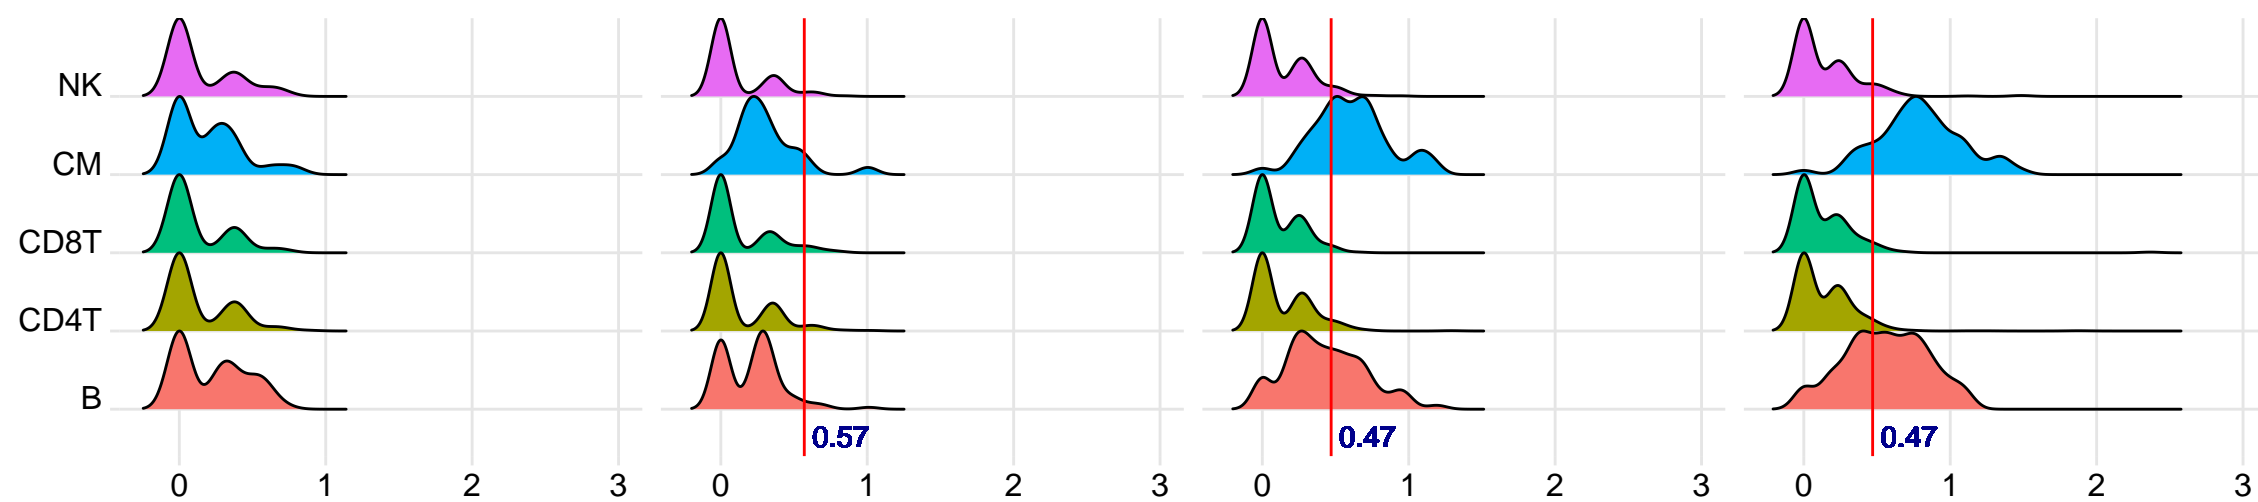**CD2**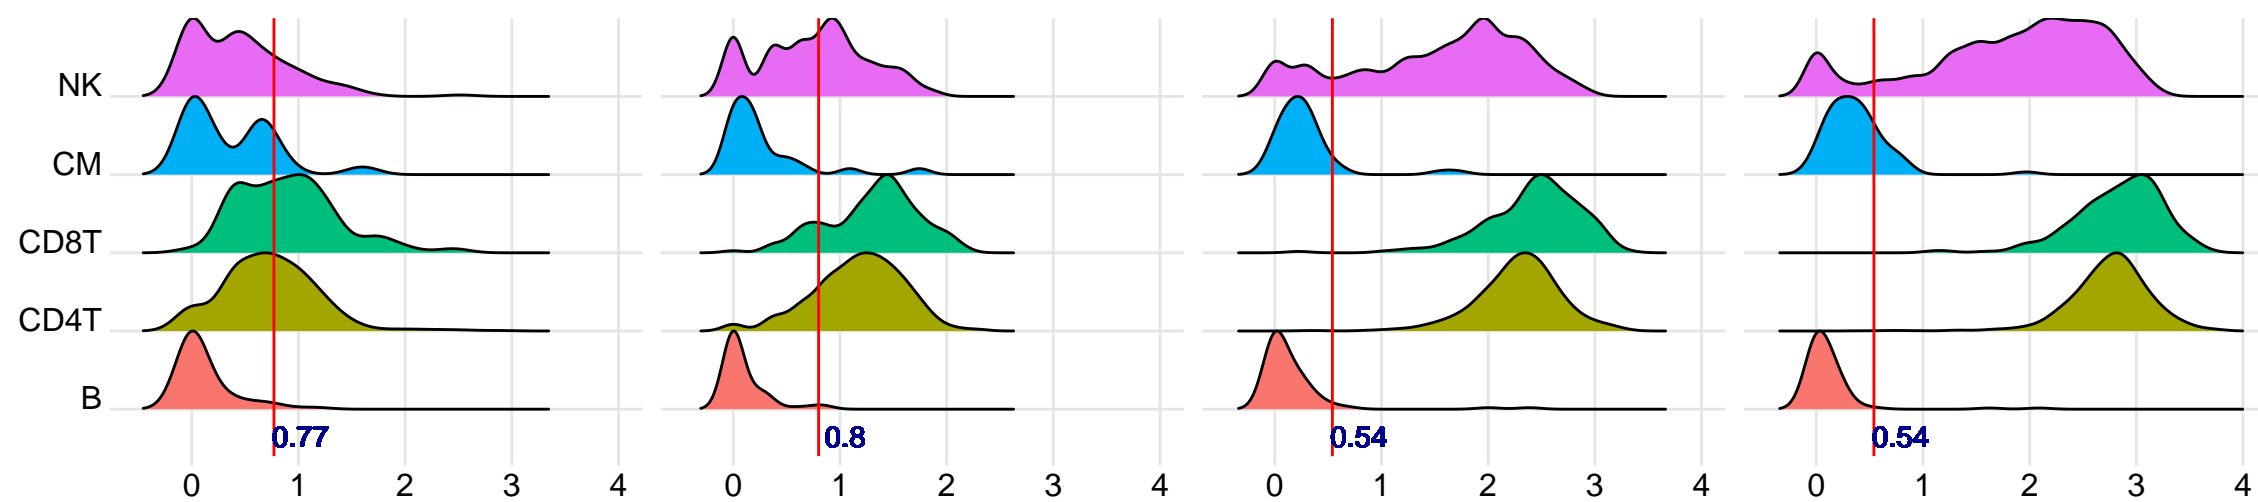**CD20**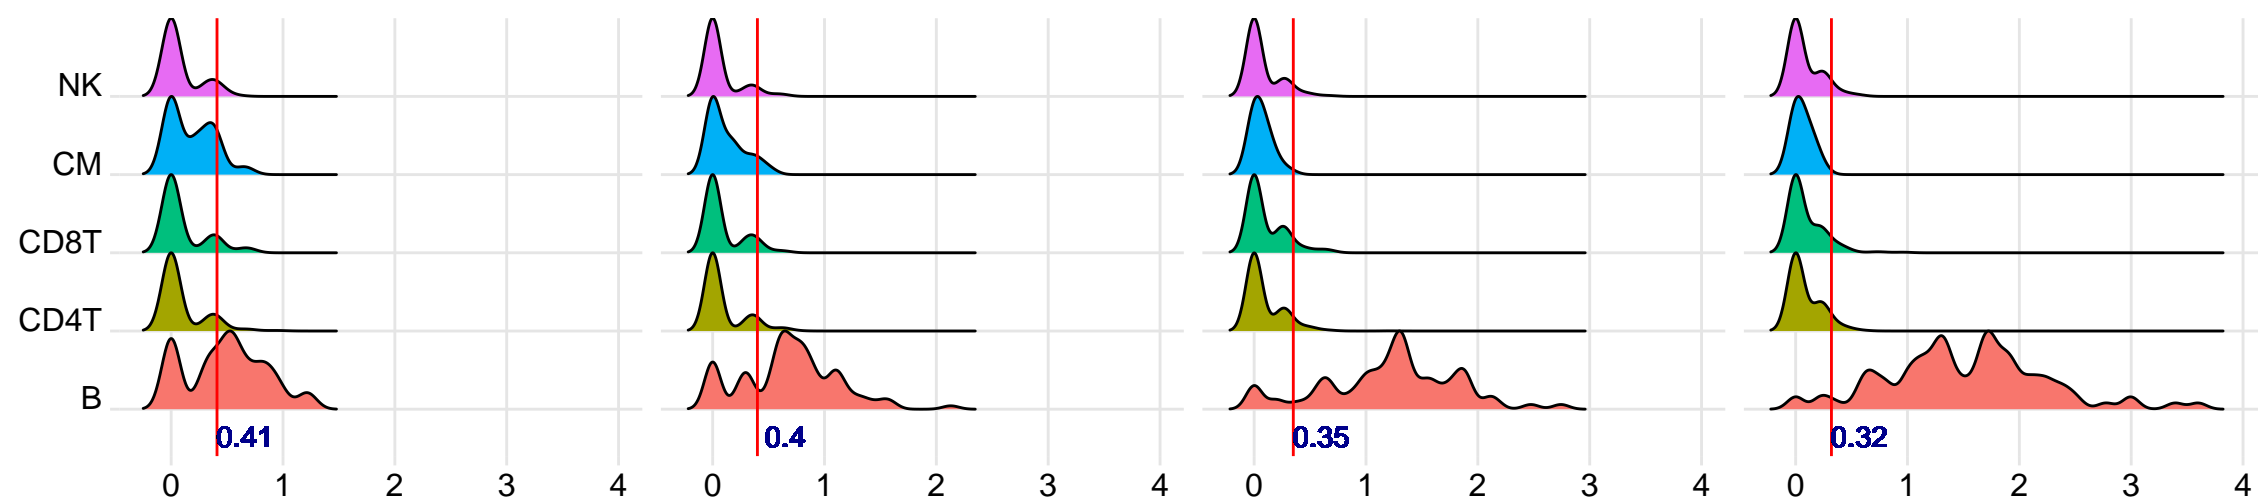

**CD21**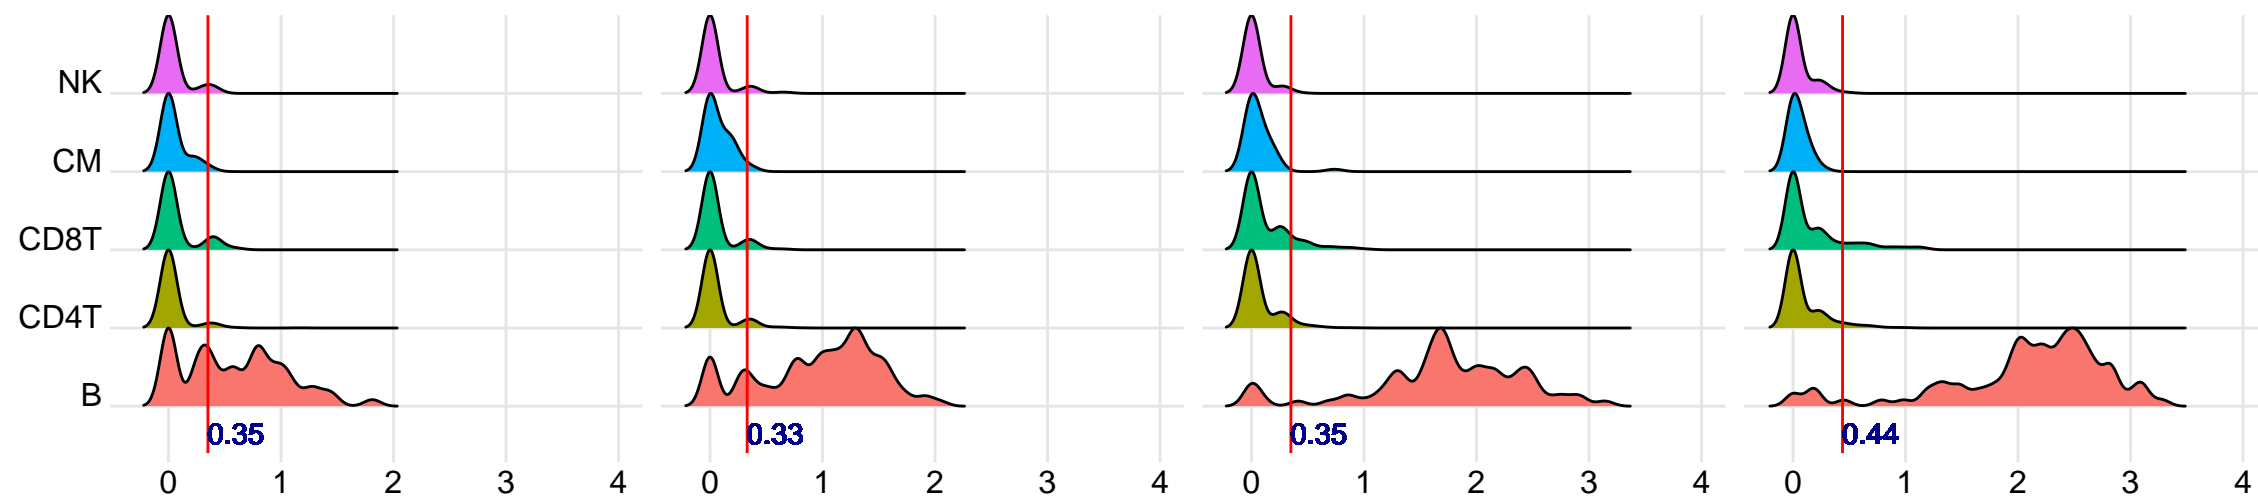**CD22**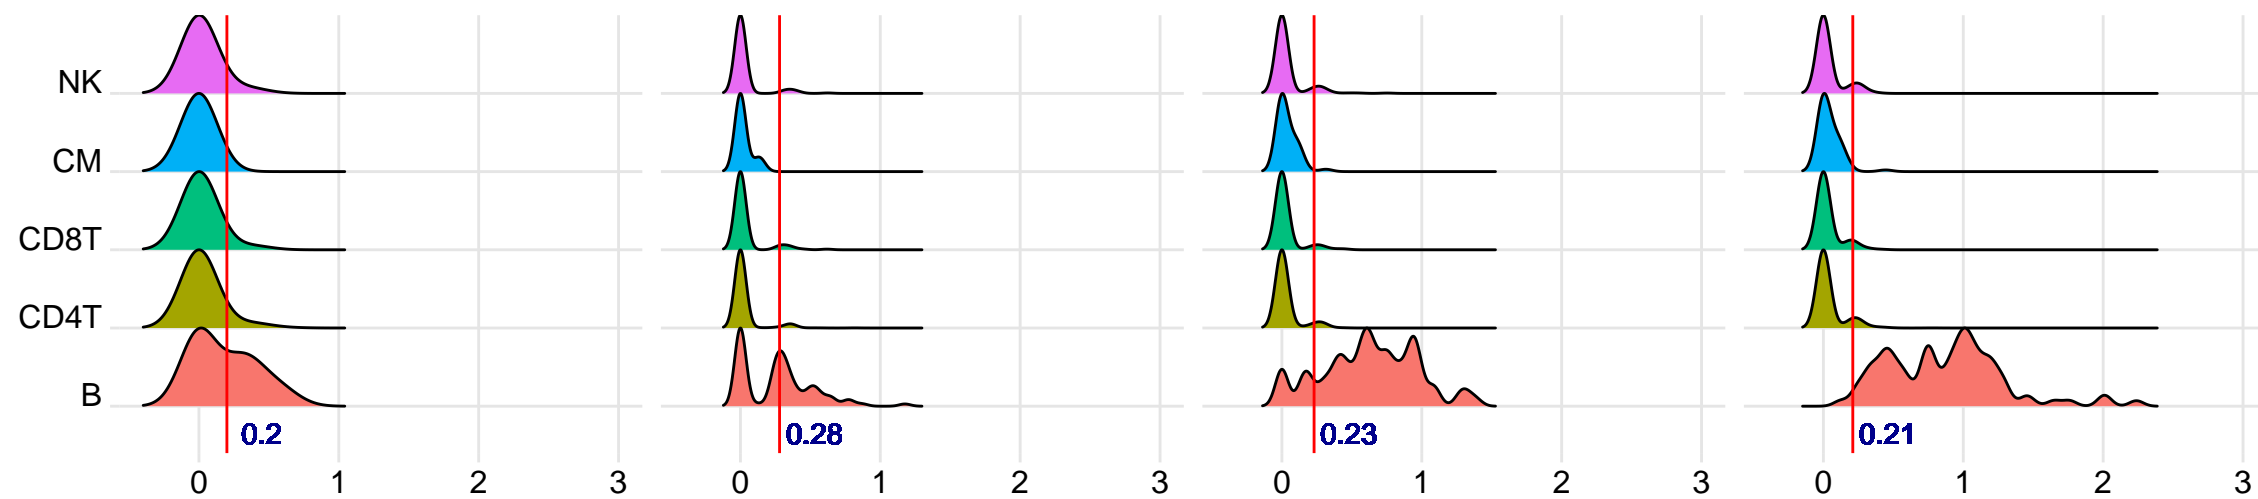**CD223**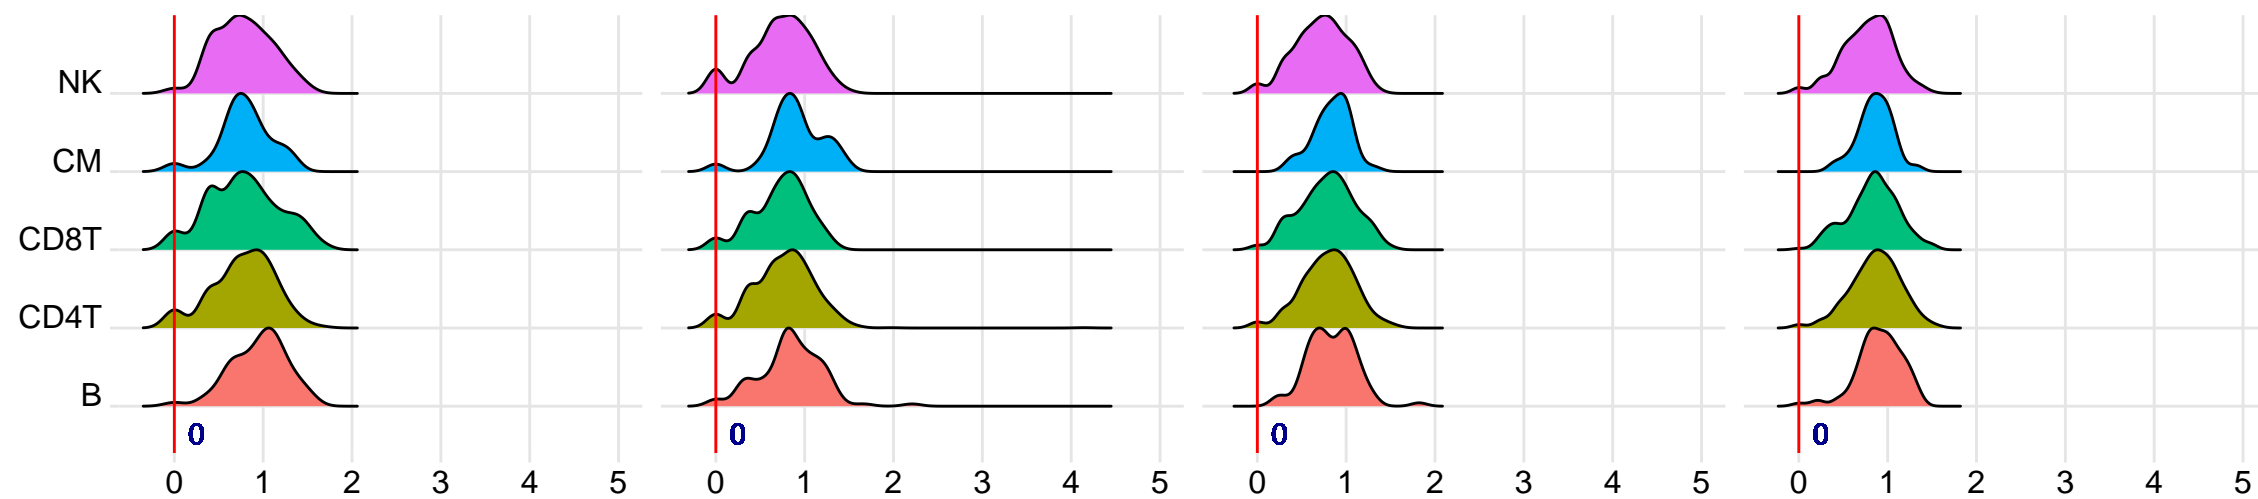**CD224**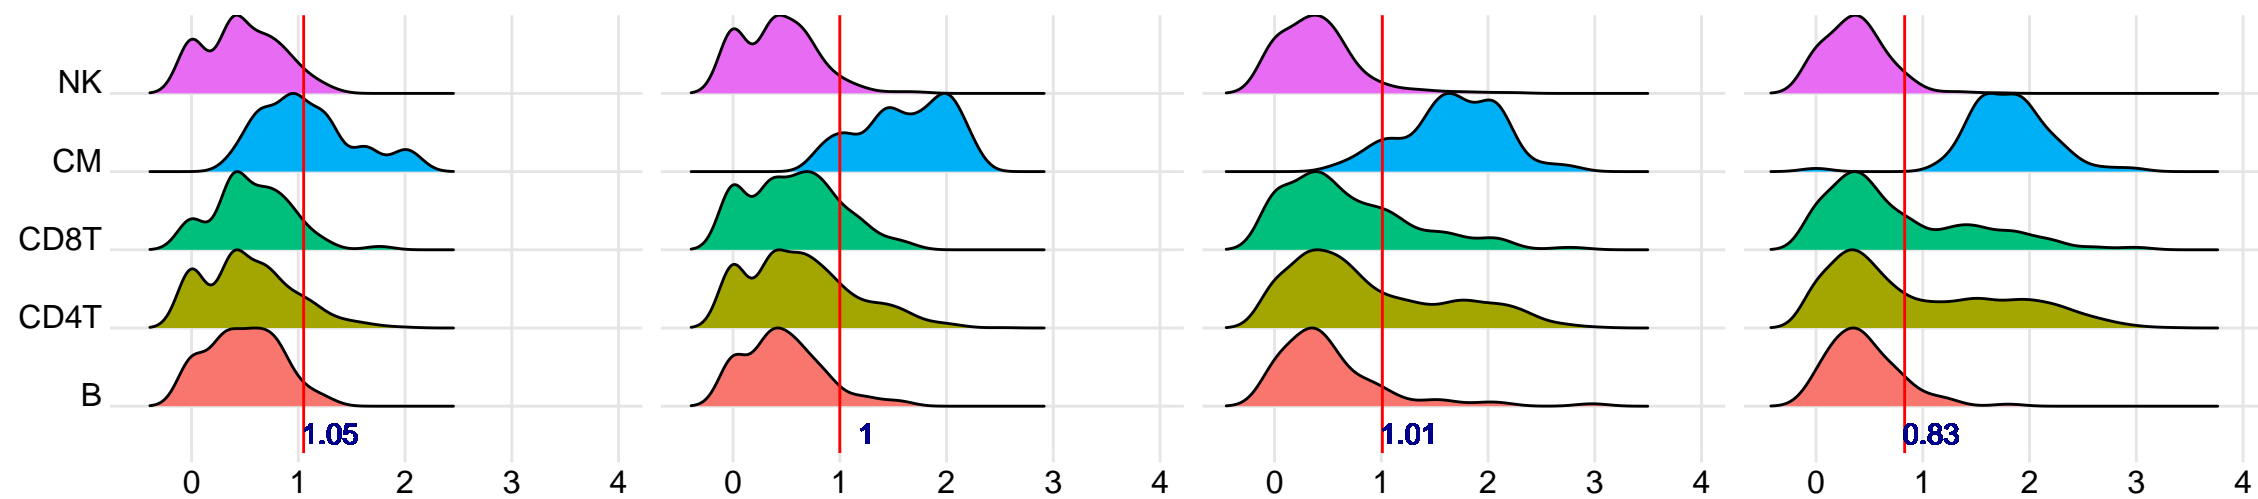**CD226**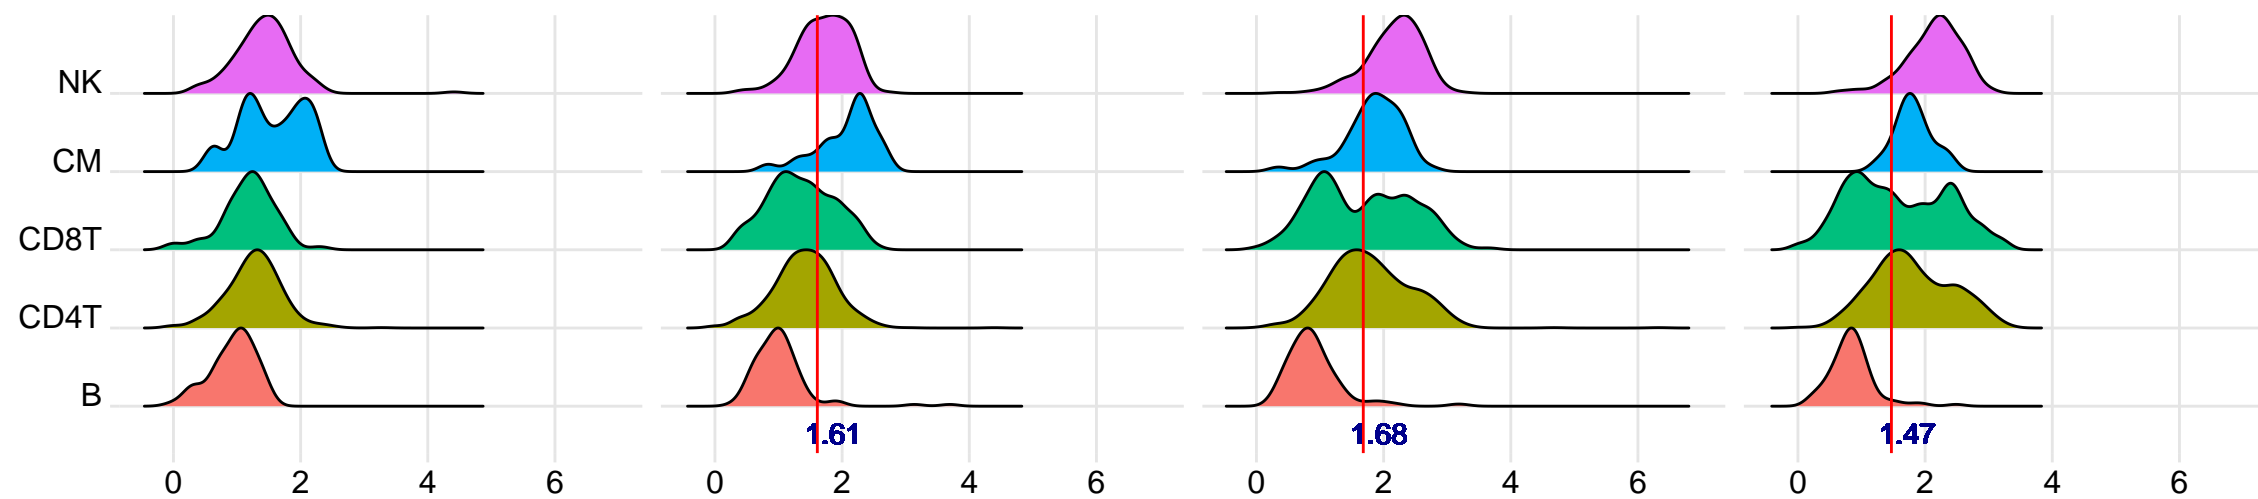

**CD23**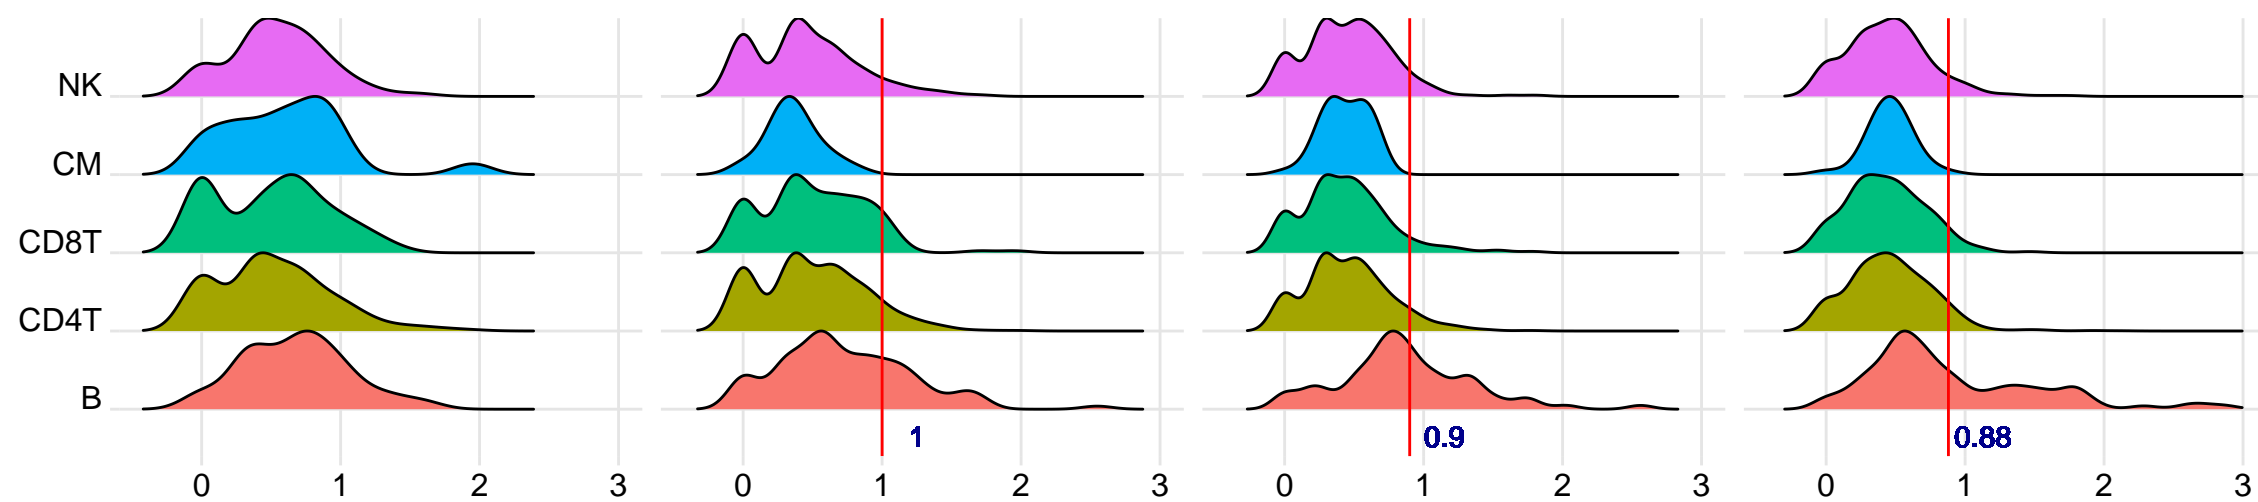**CD24**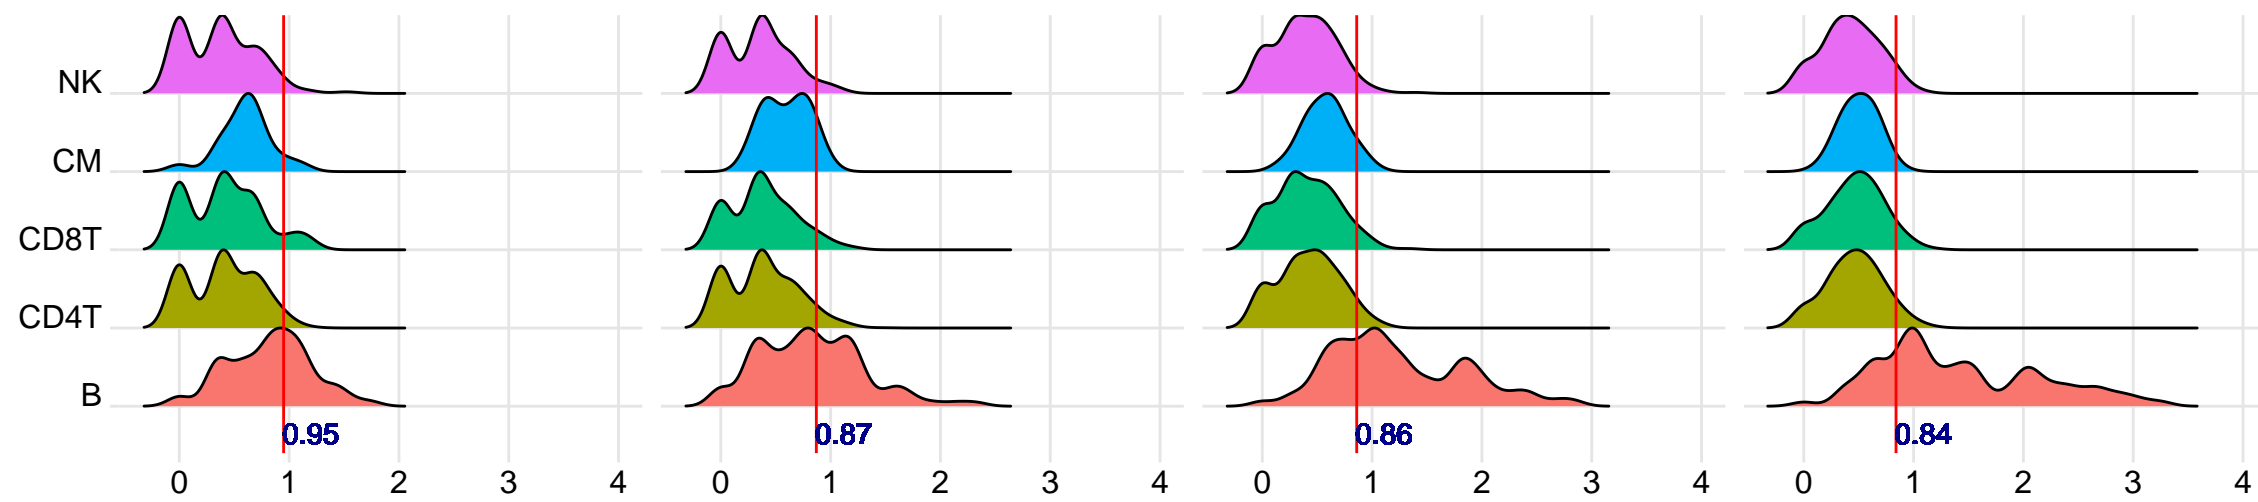**CD244**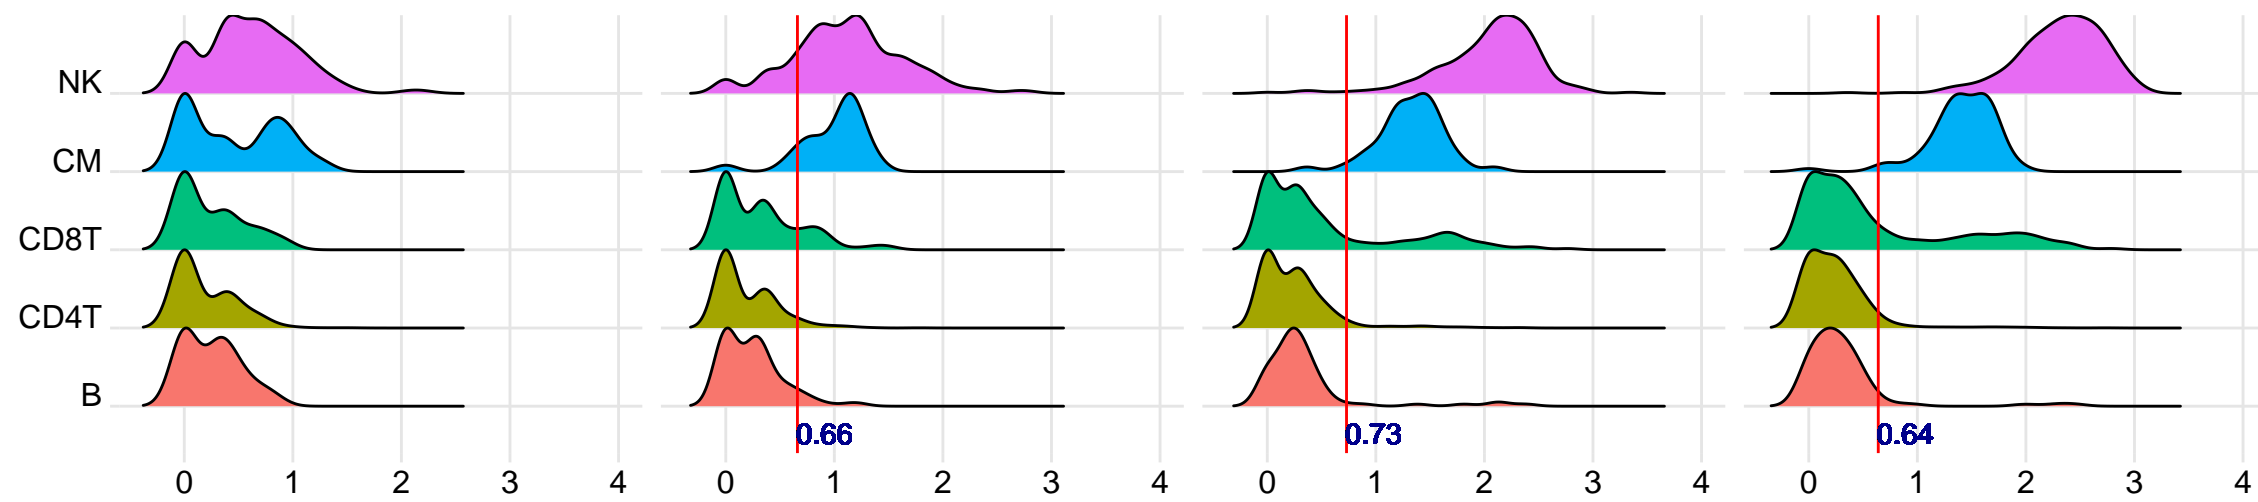**CD25**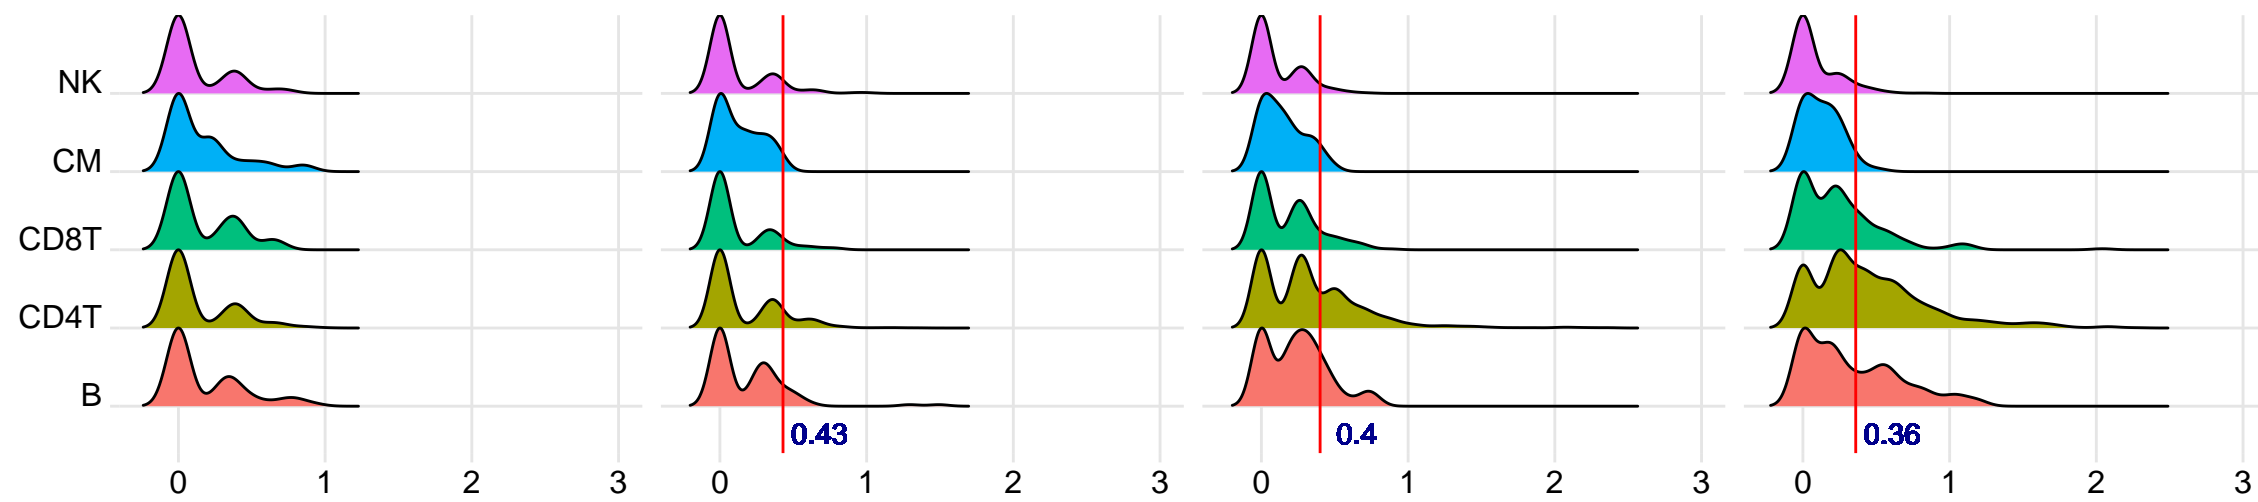**CD254**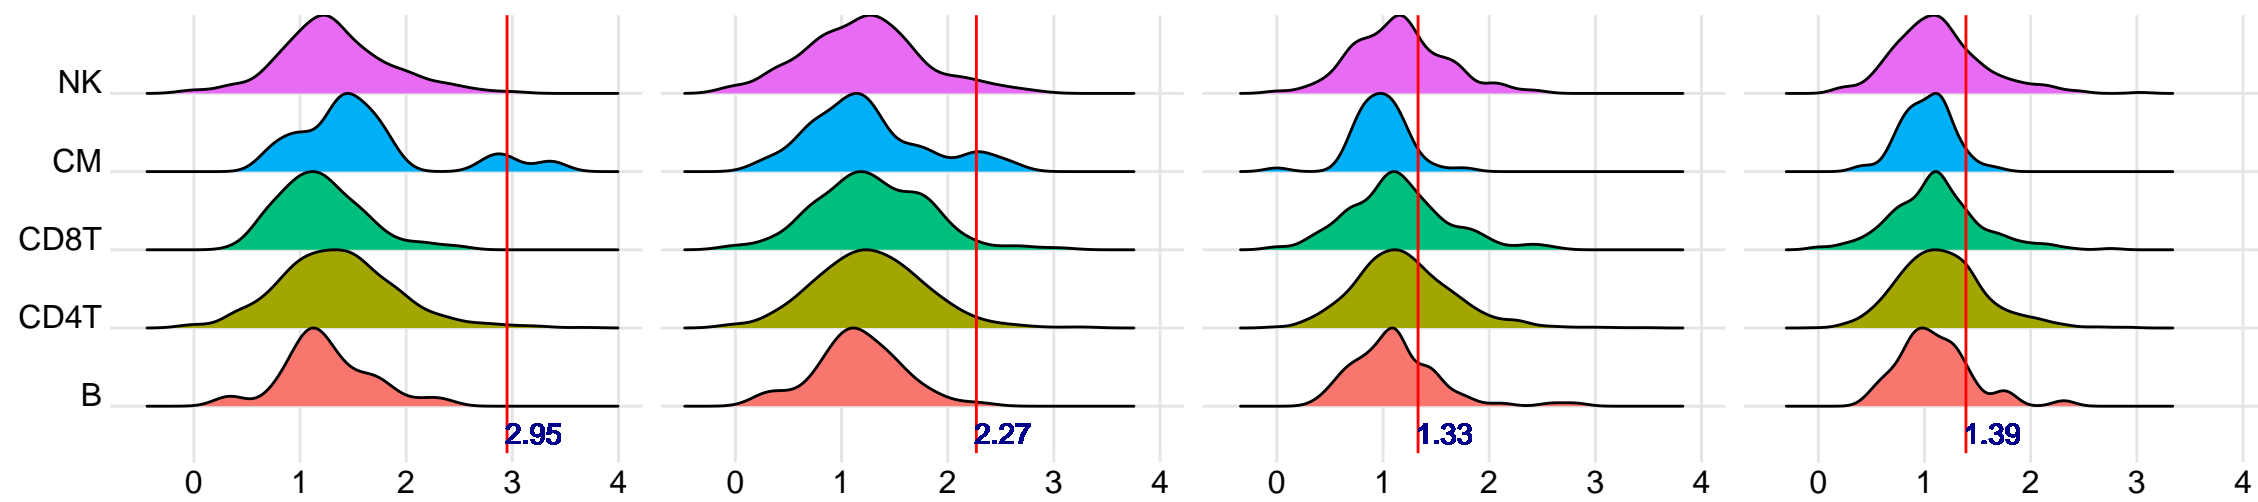

**CD26**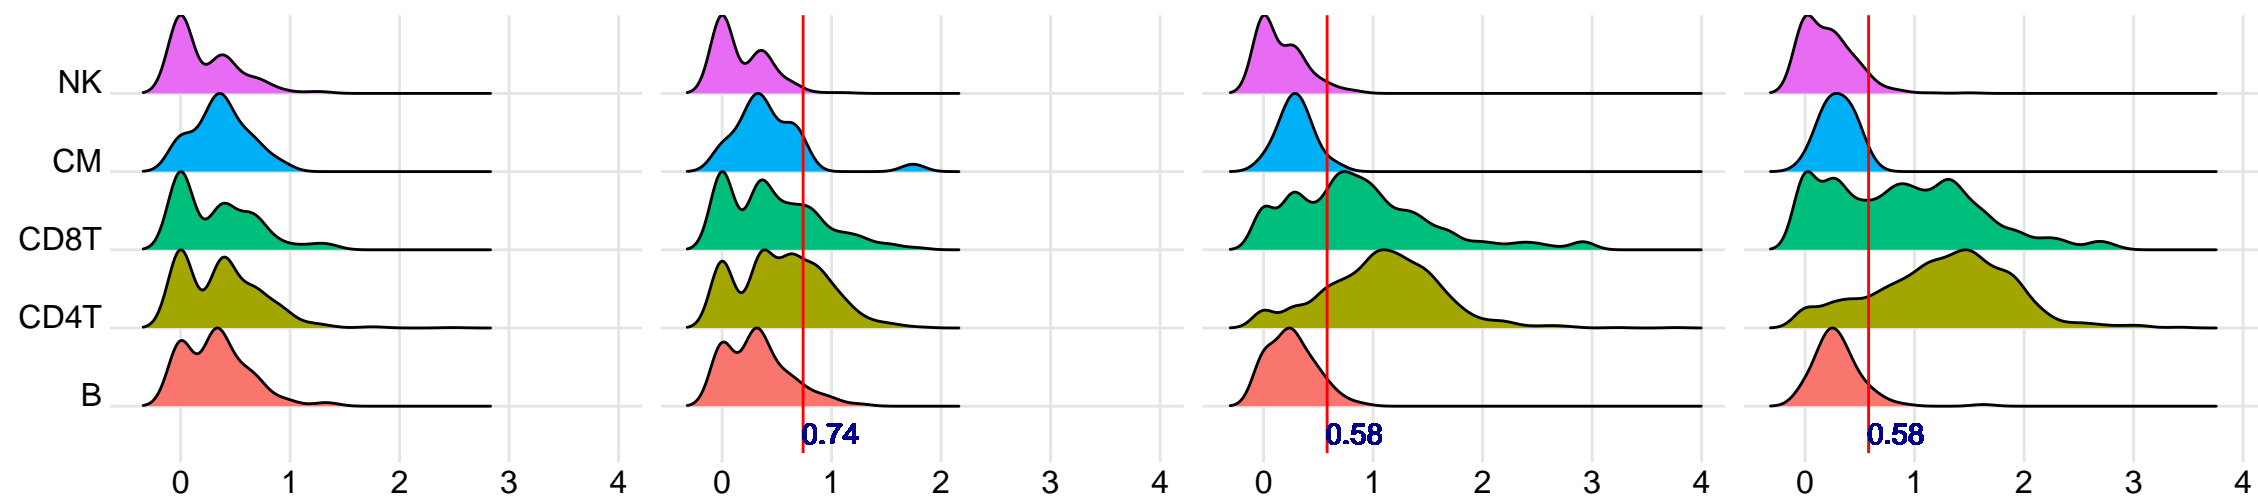**CD267**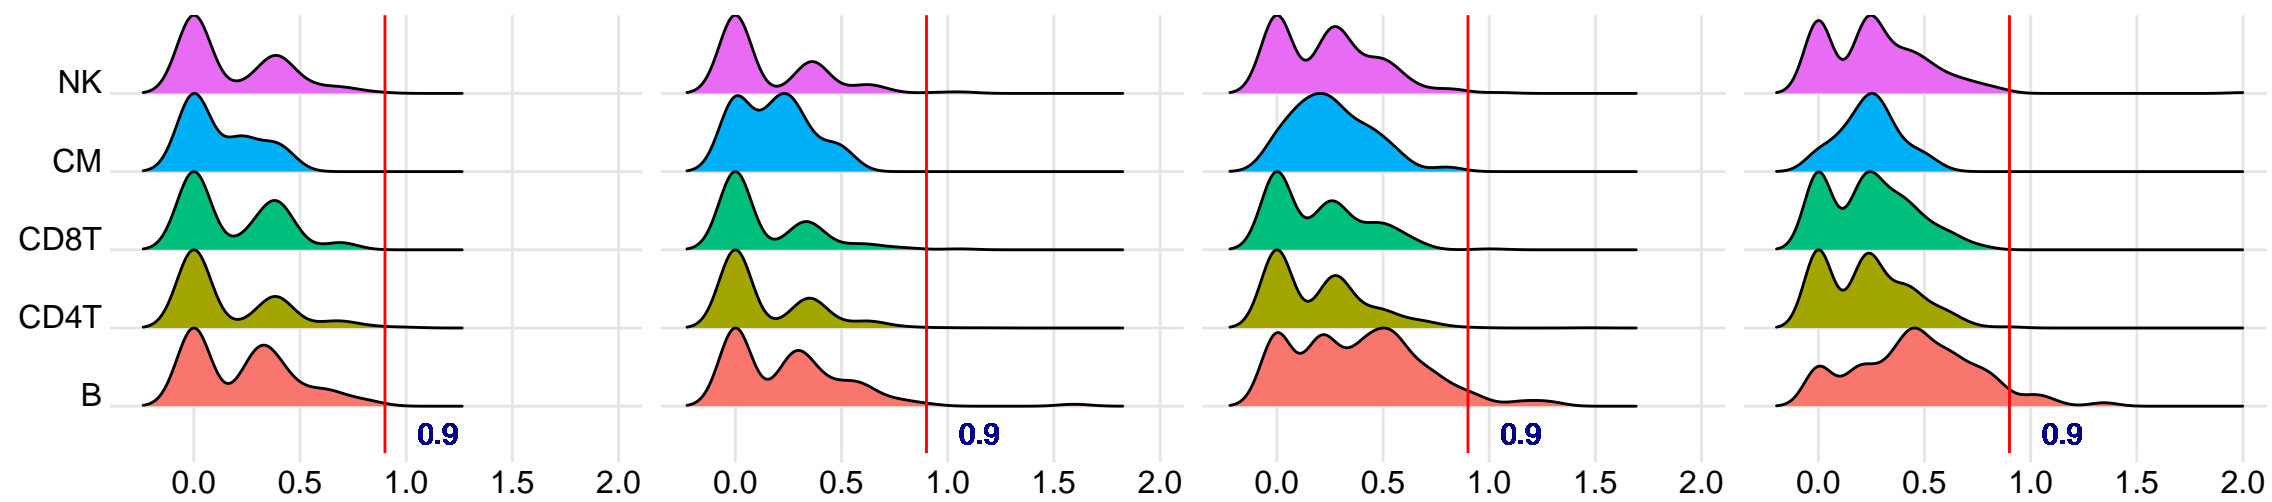**CD268**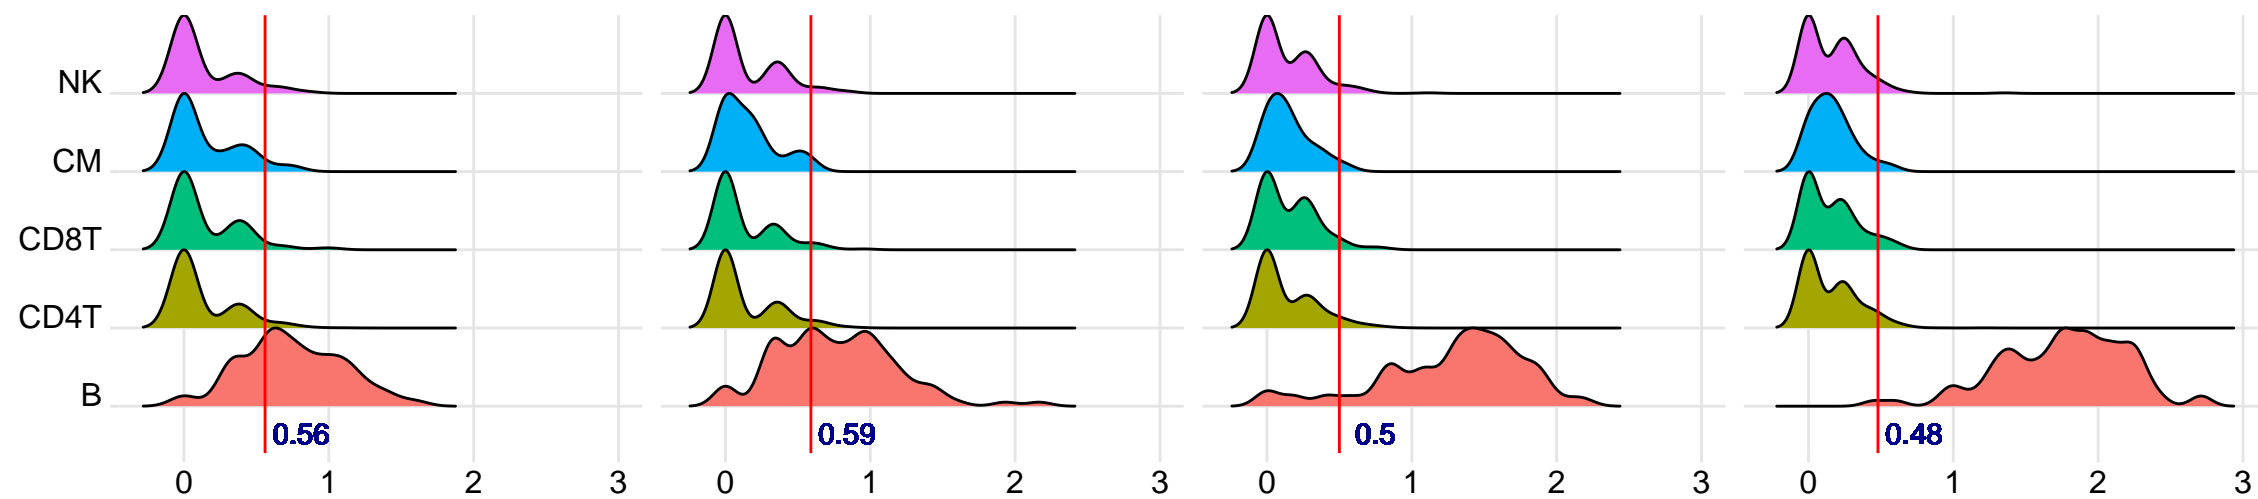**CD27**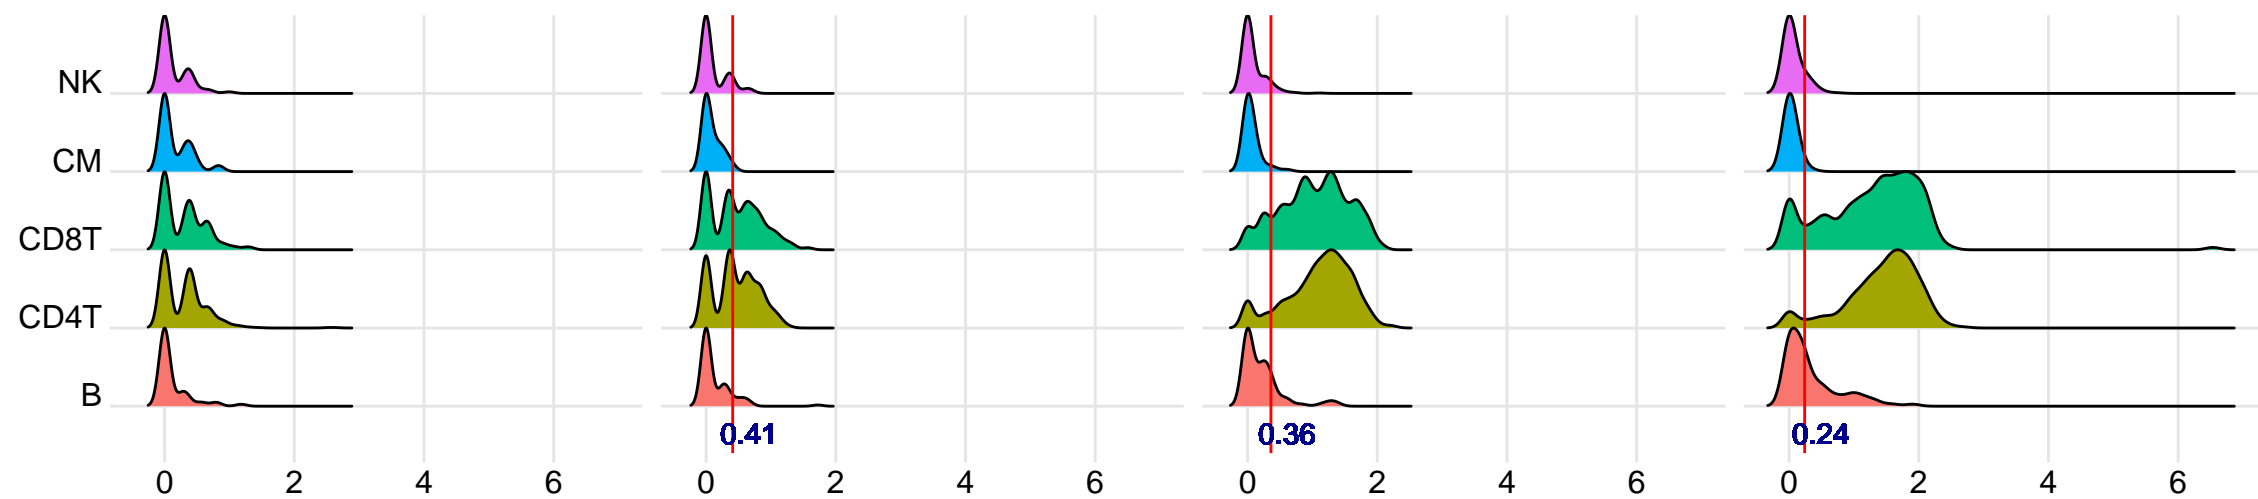**CD272**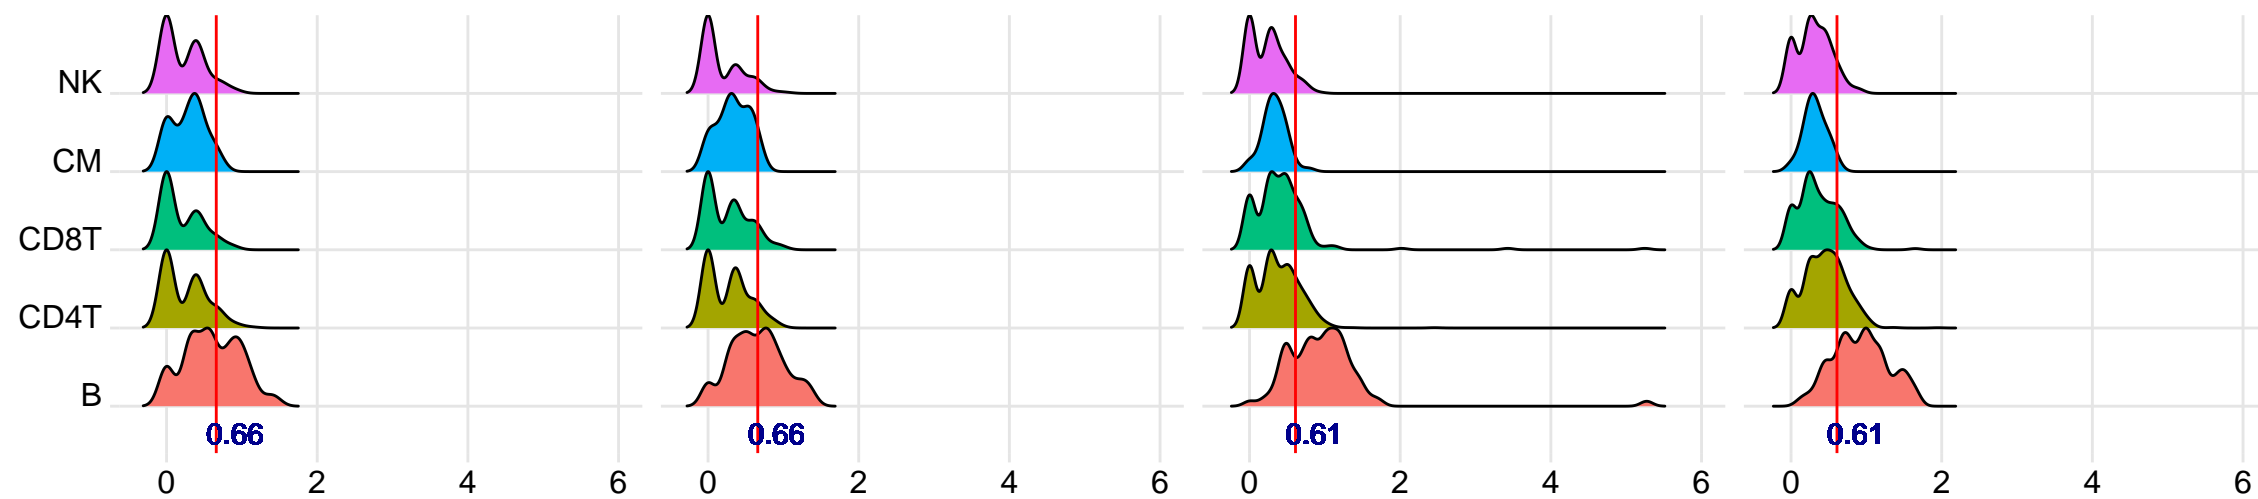

**CD278**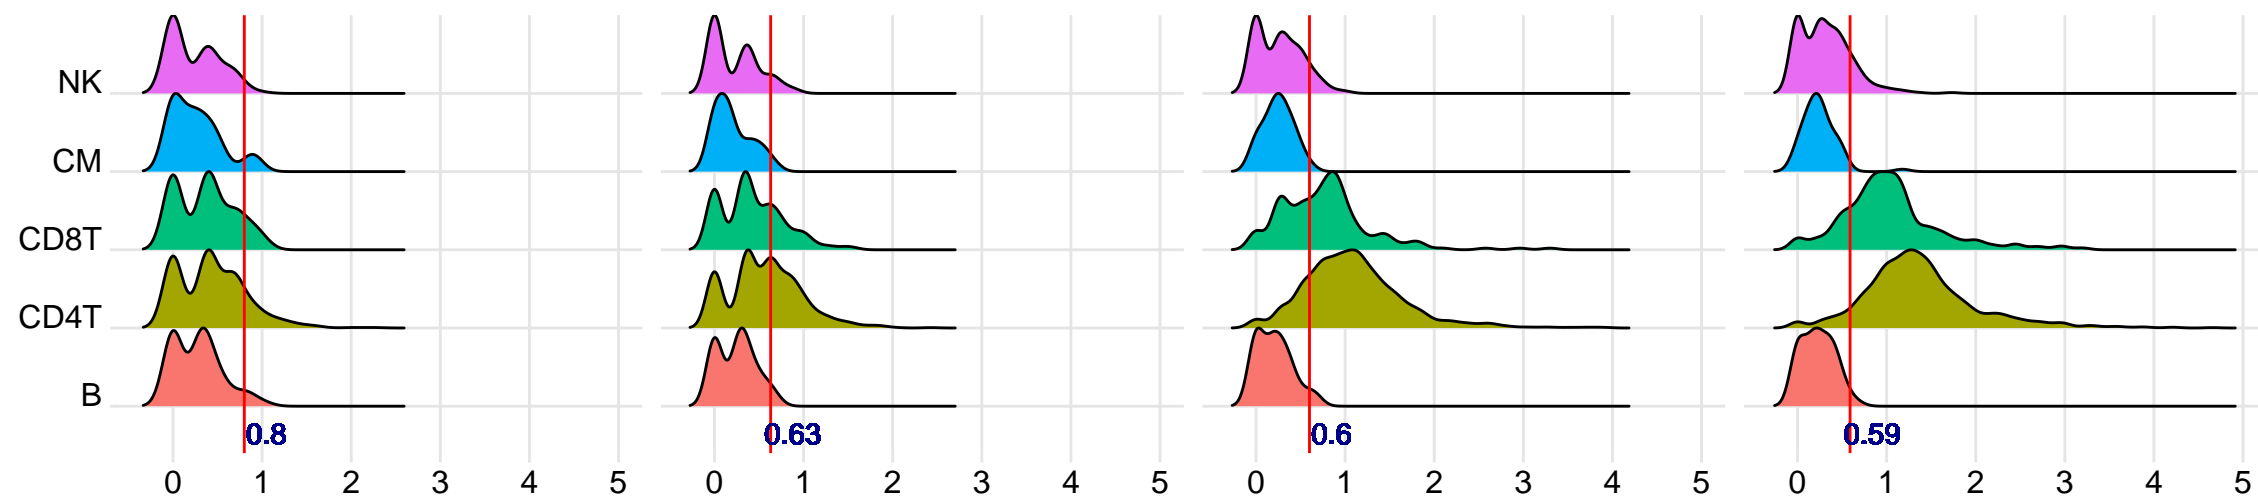**CD279**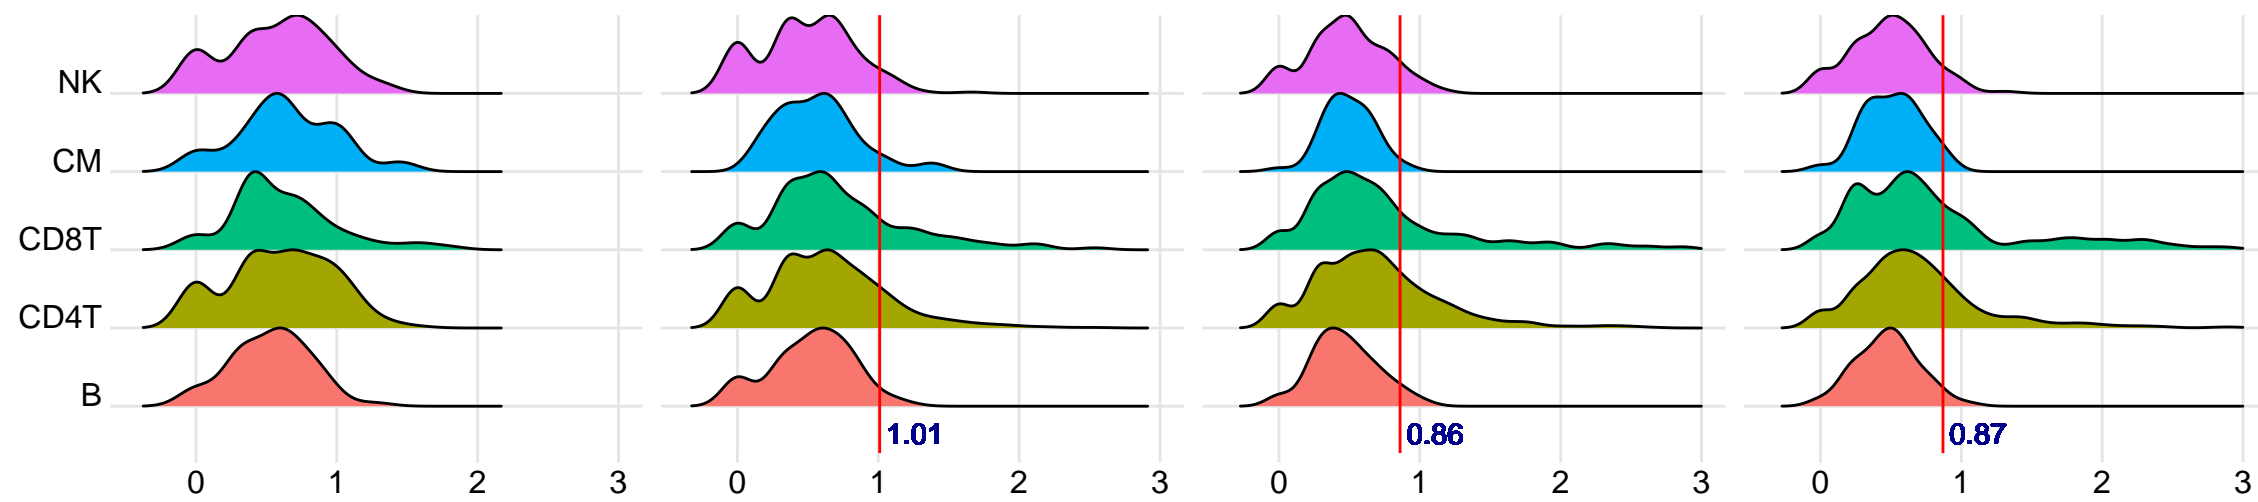**CD28**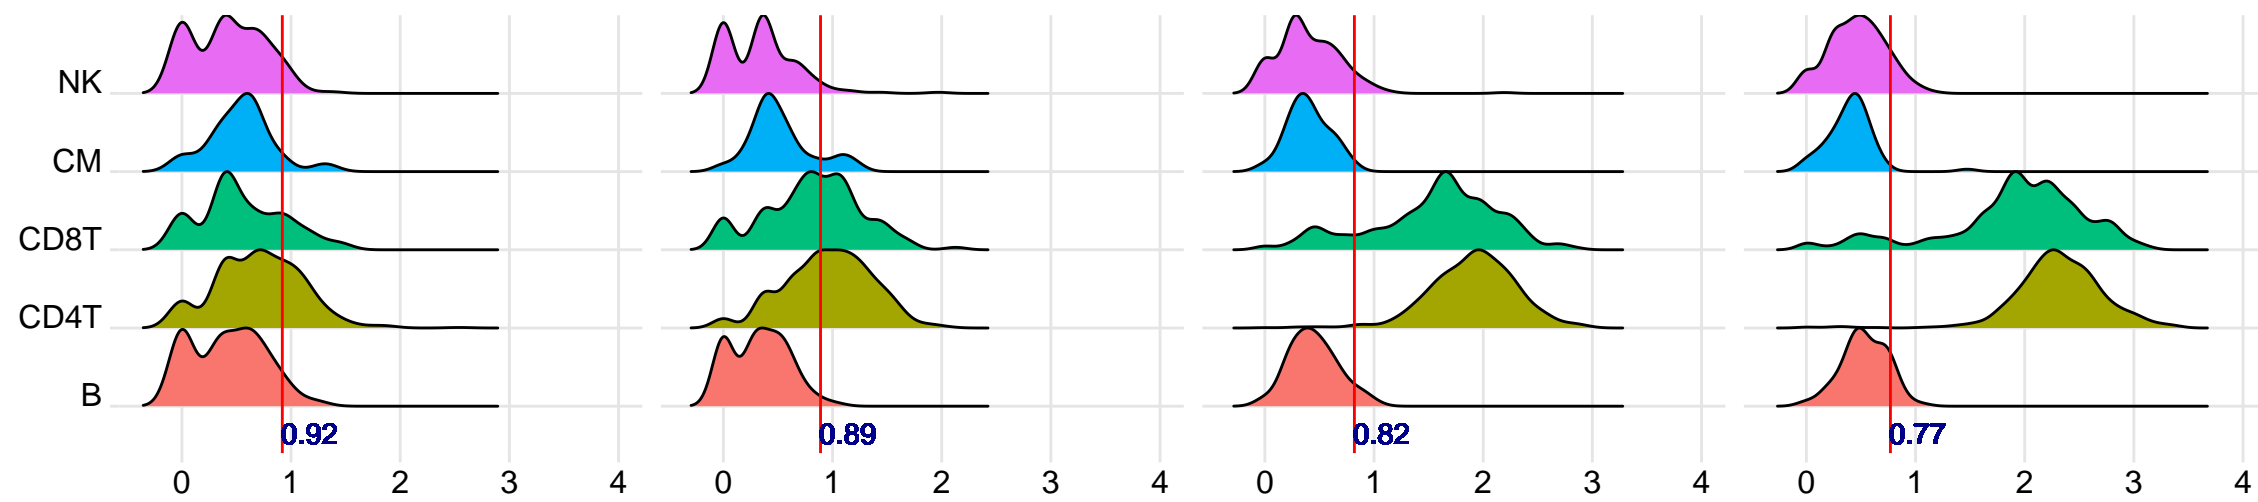**CD29**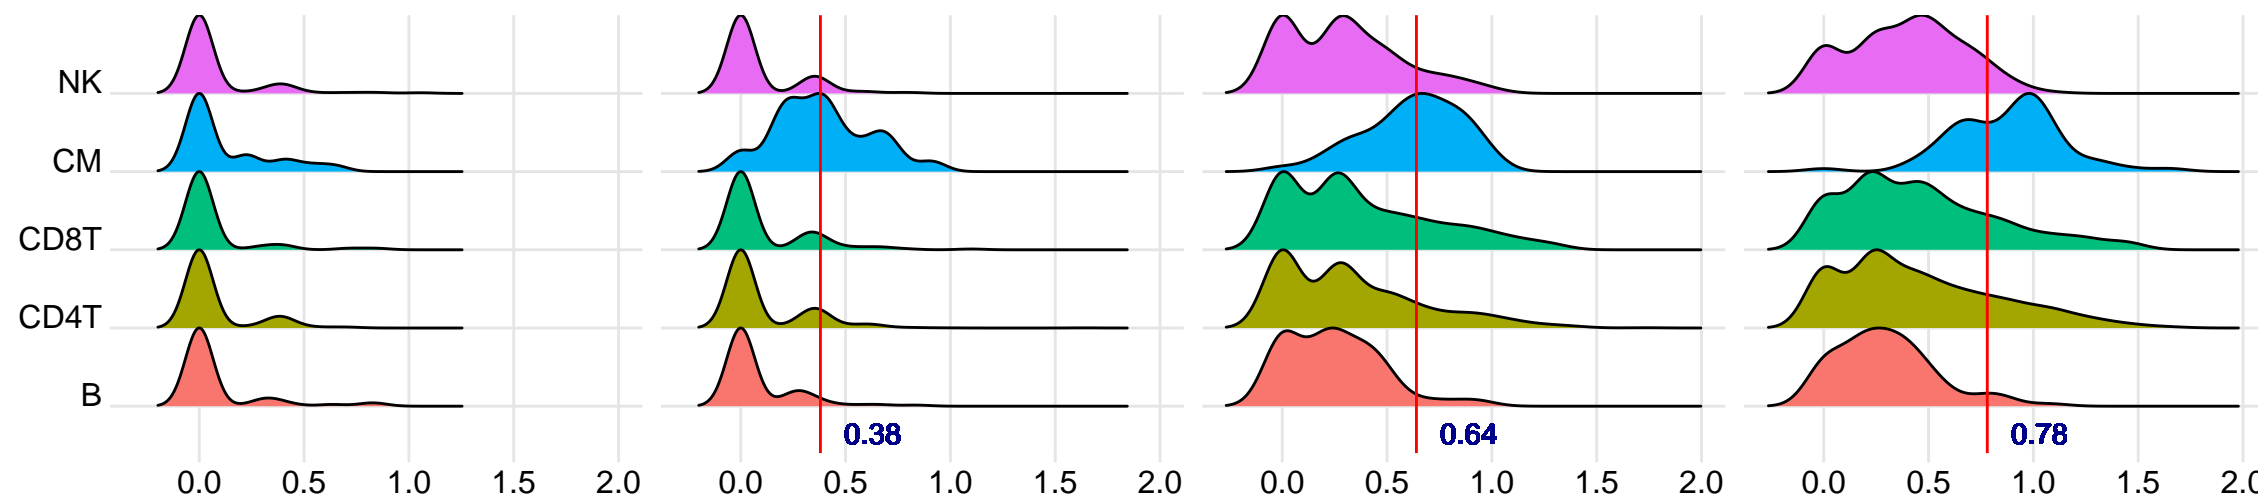**CD3**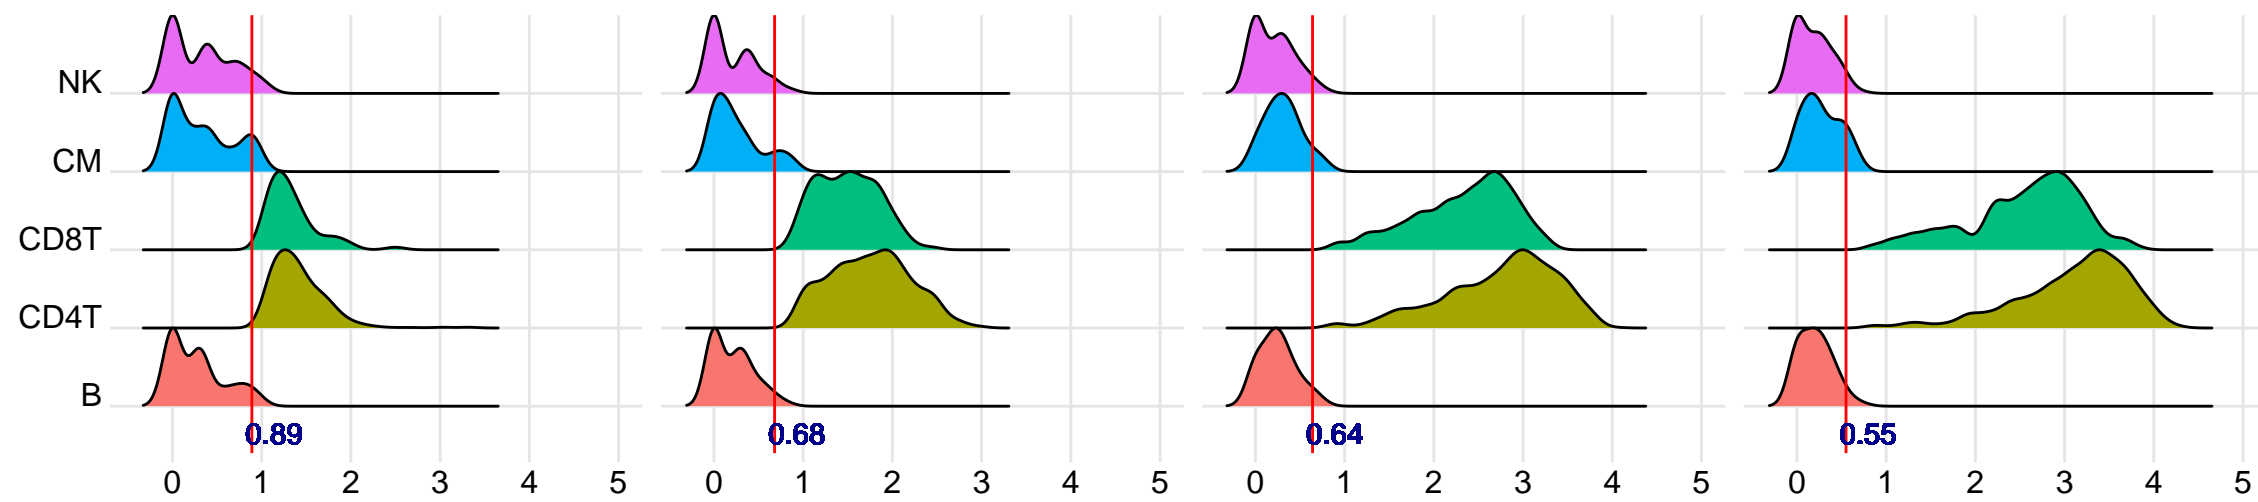



**CD30**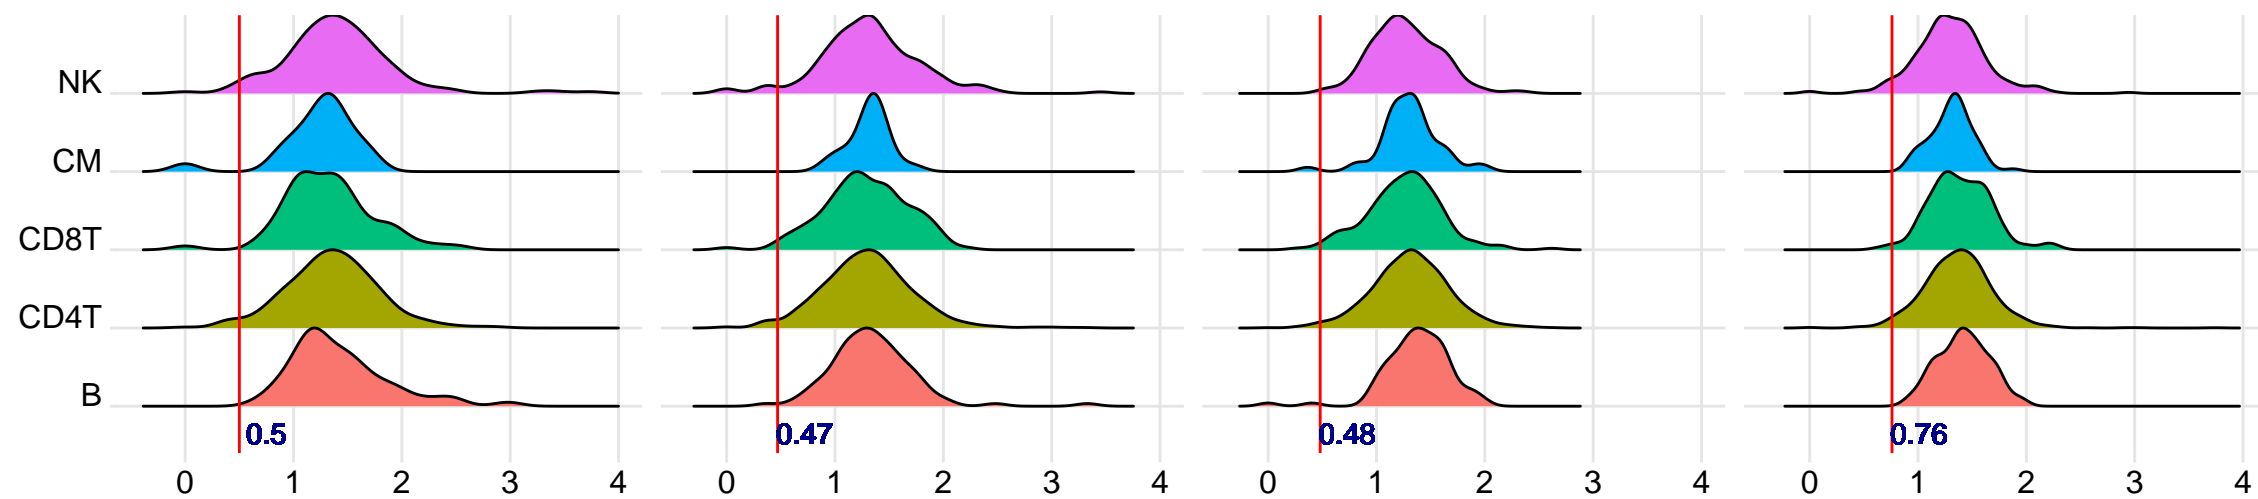**CD305**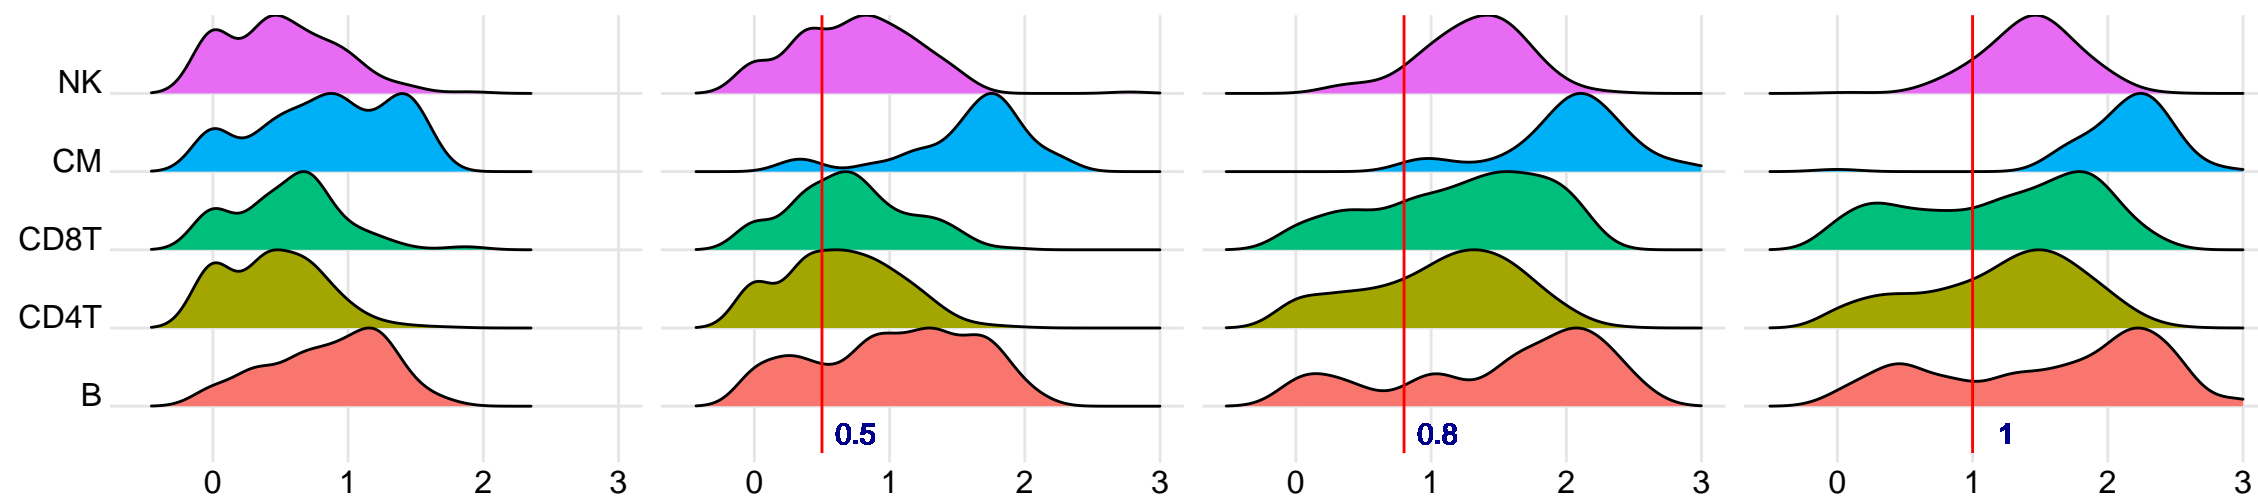**CD307d**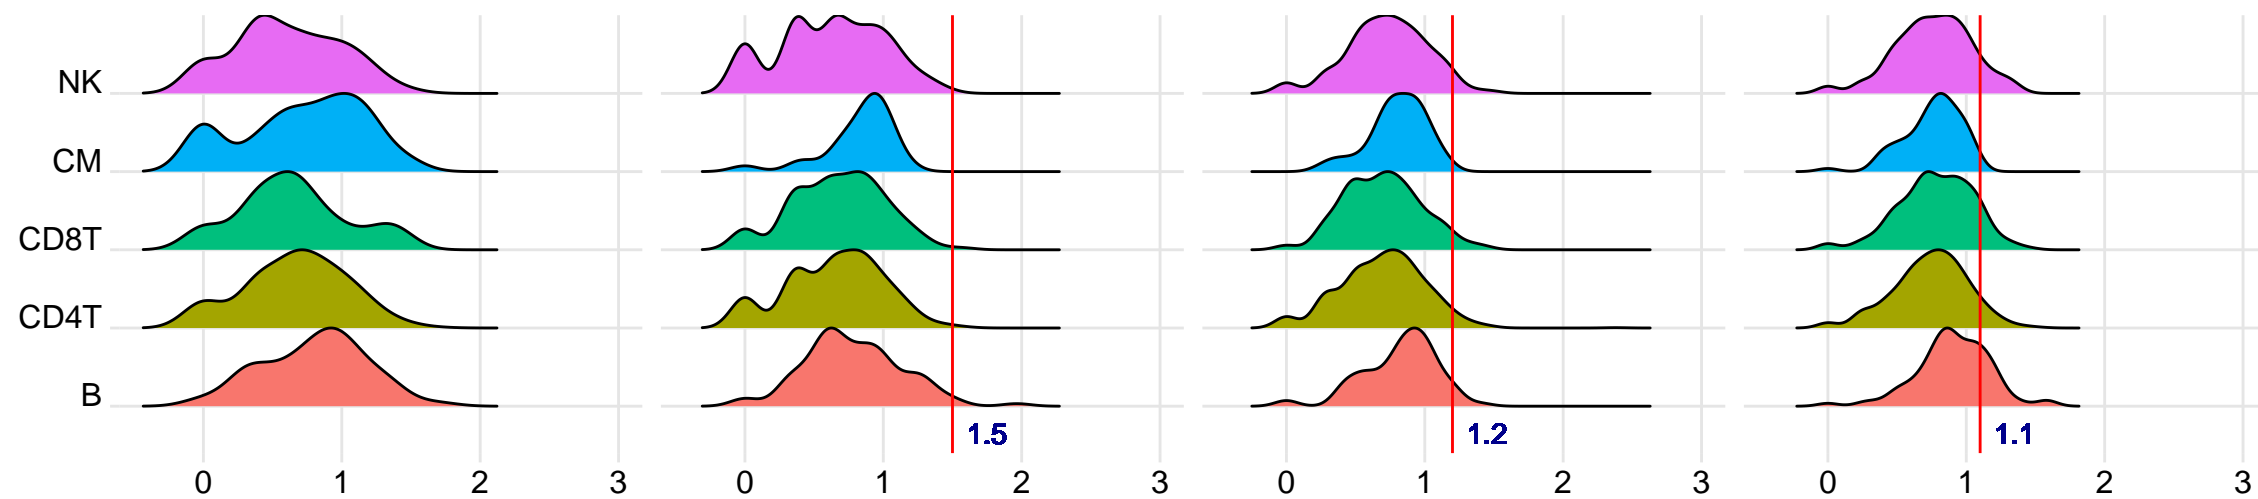**CD31**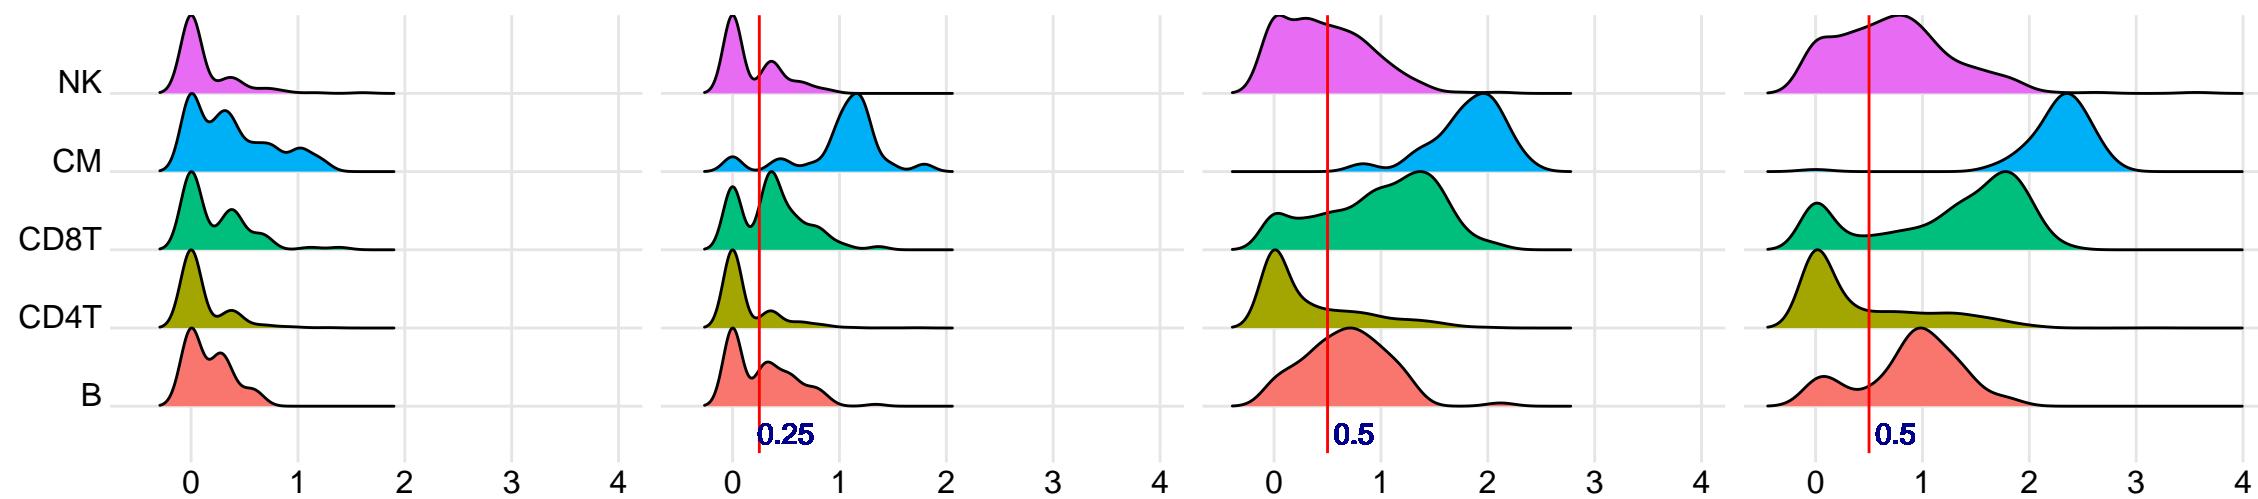**CD314**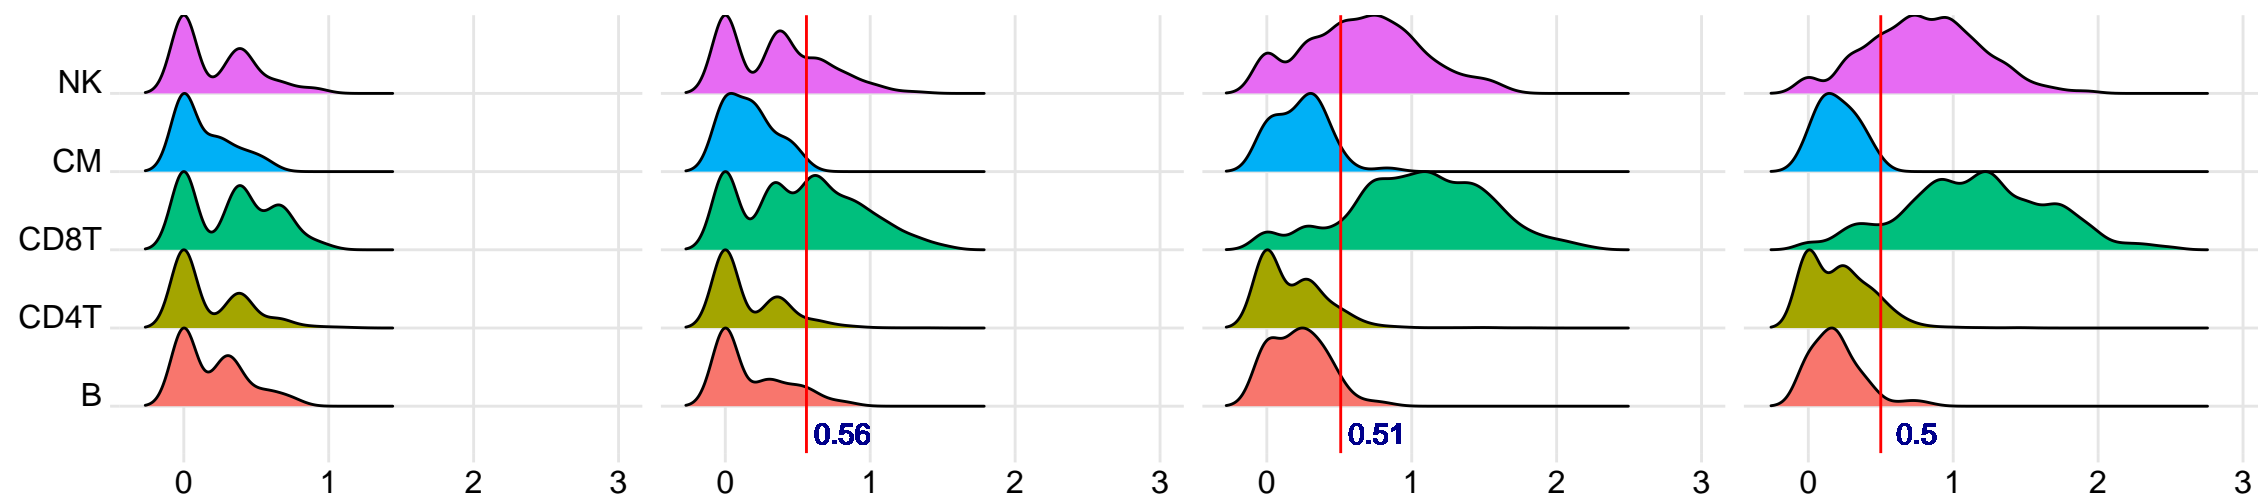

**CD319**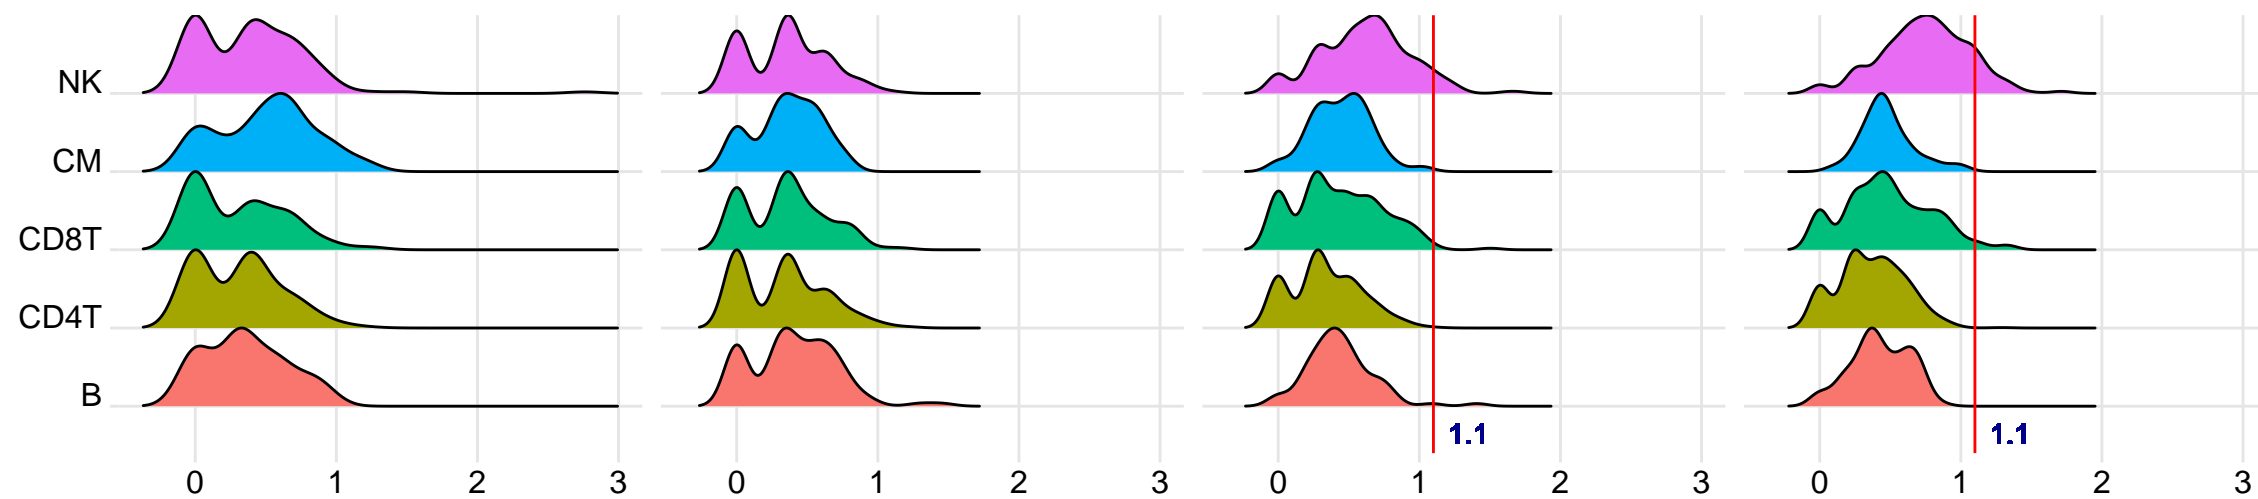**CD32**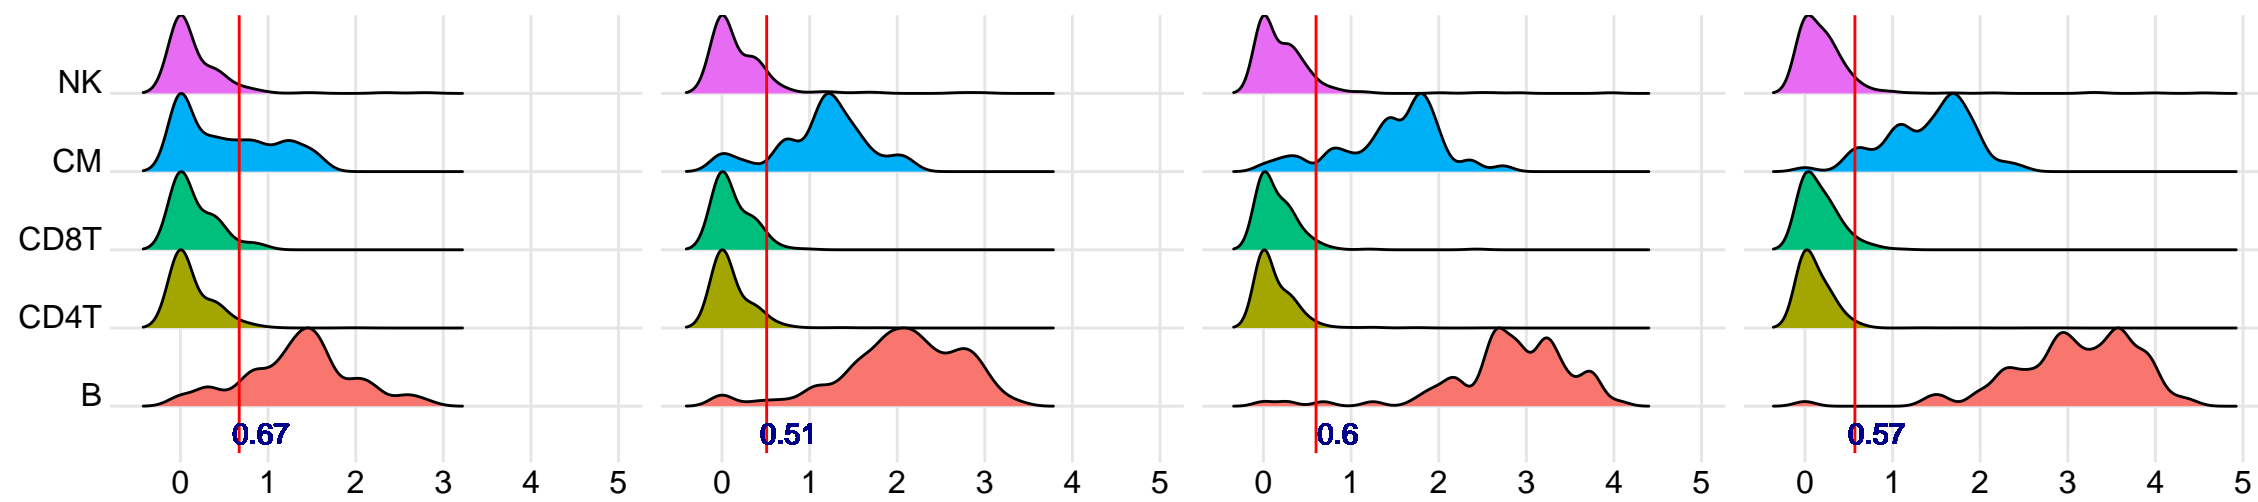**CD328**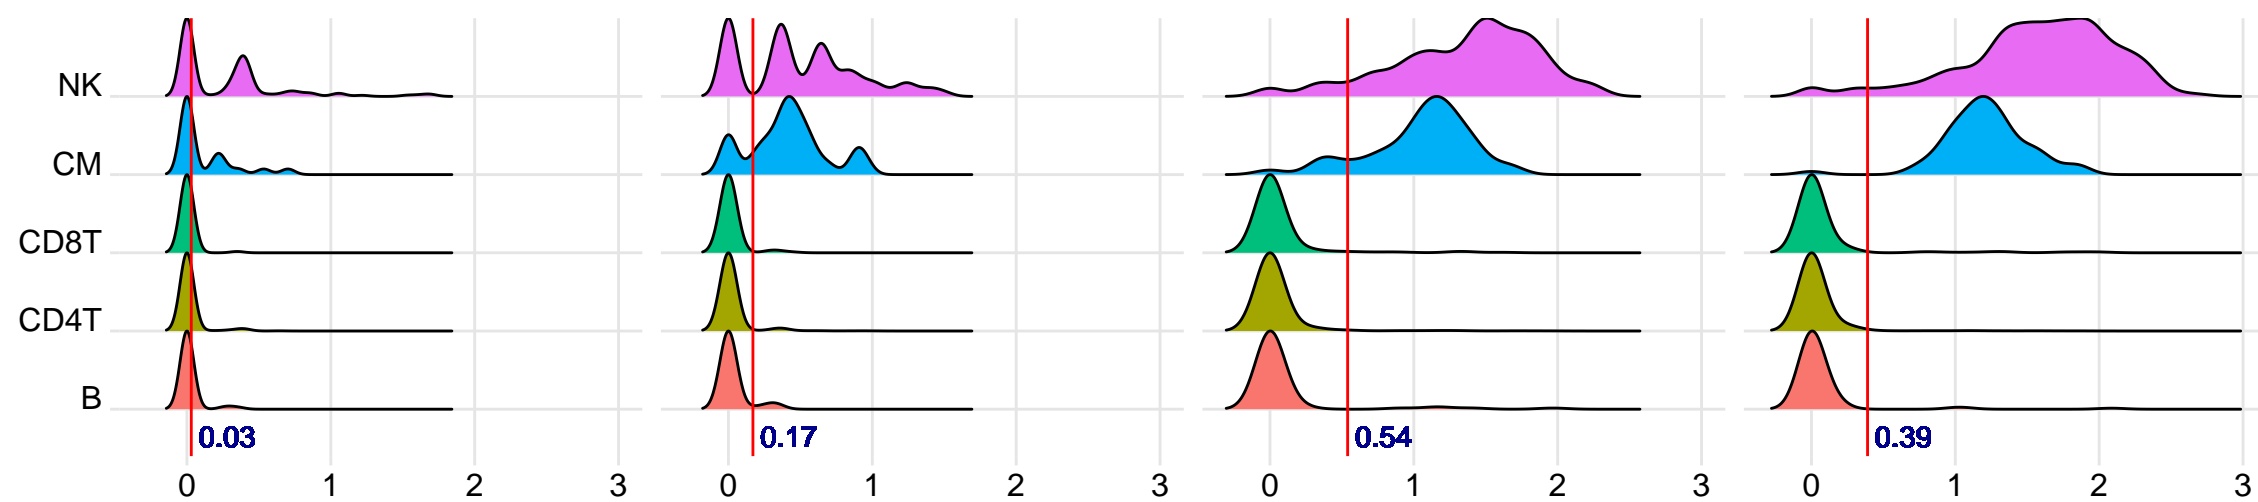**CD33**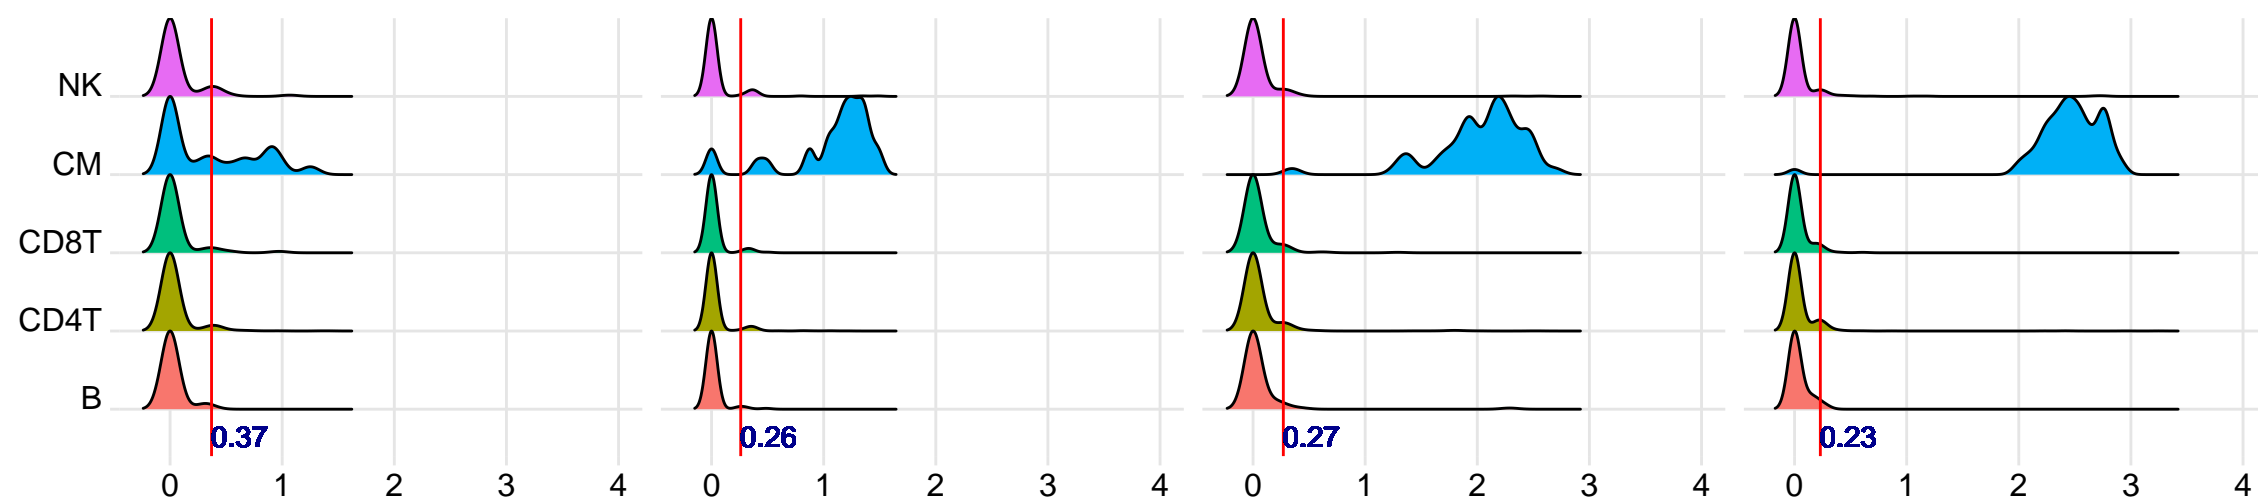**CD335**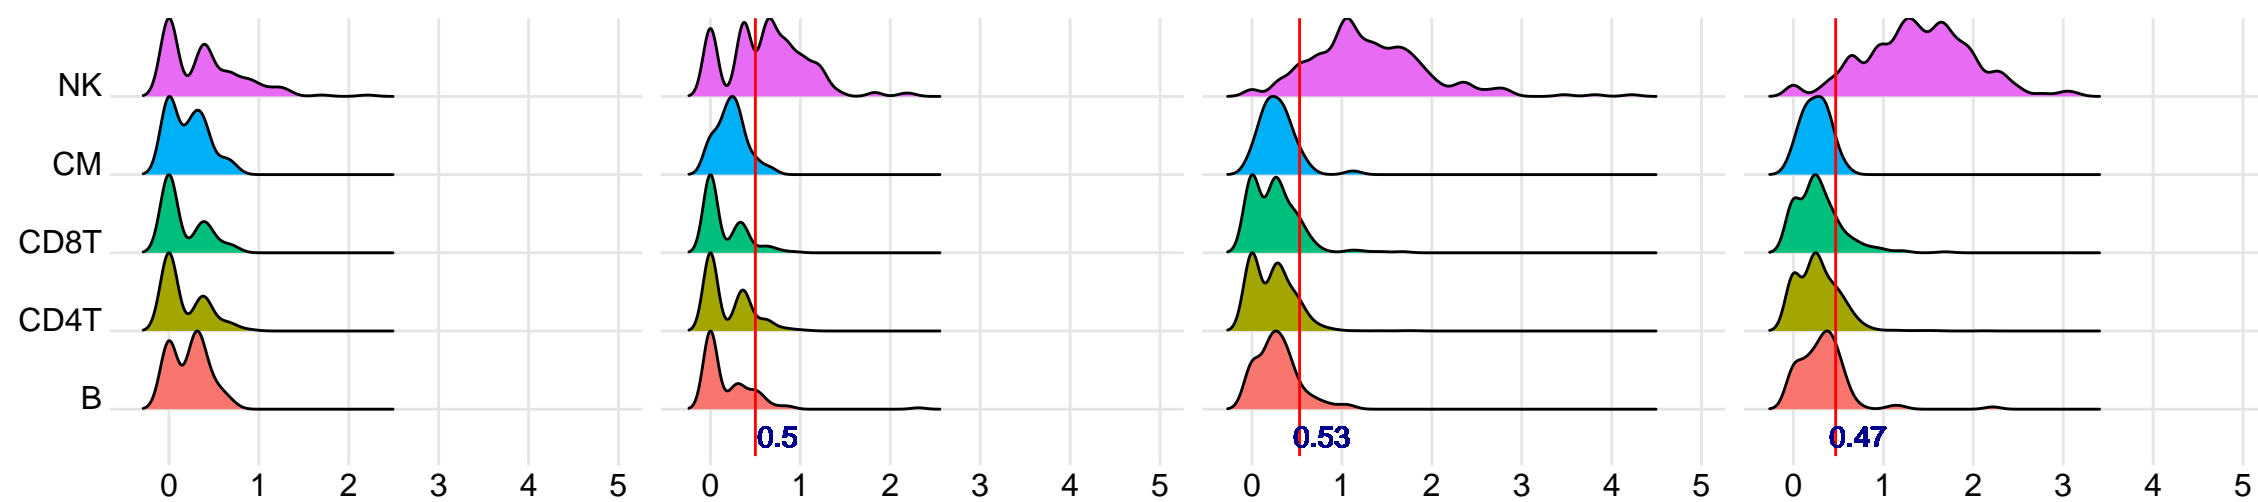

**CD337**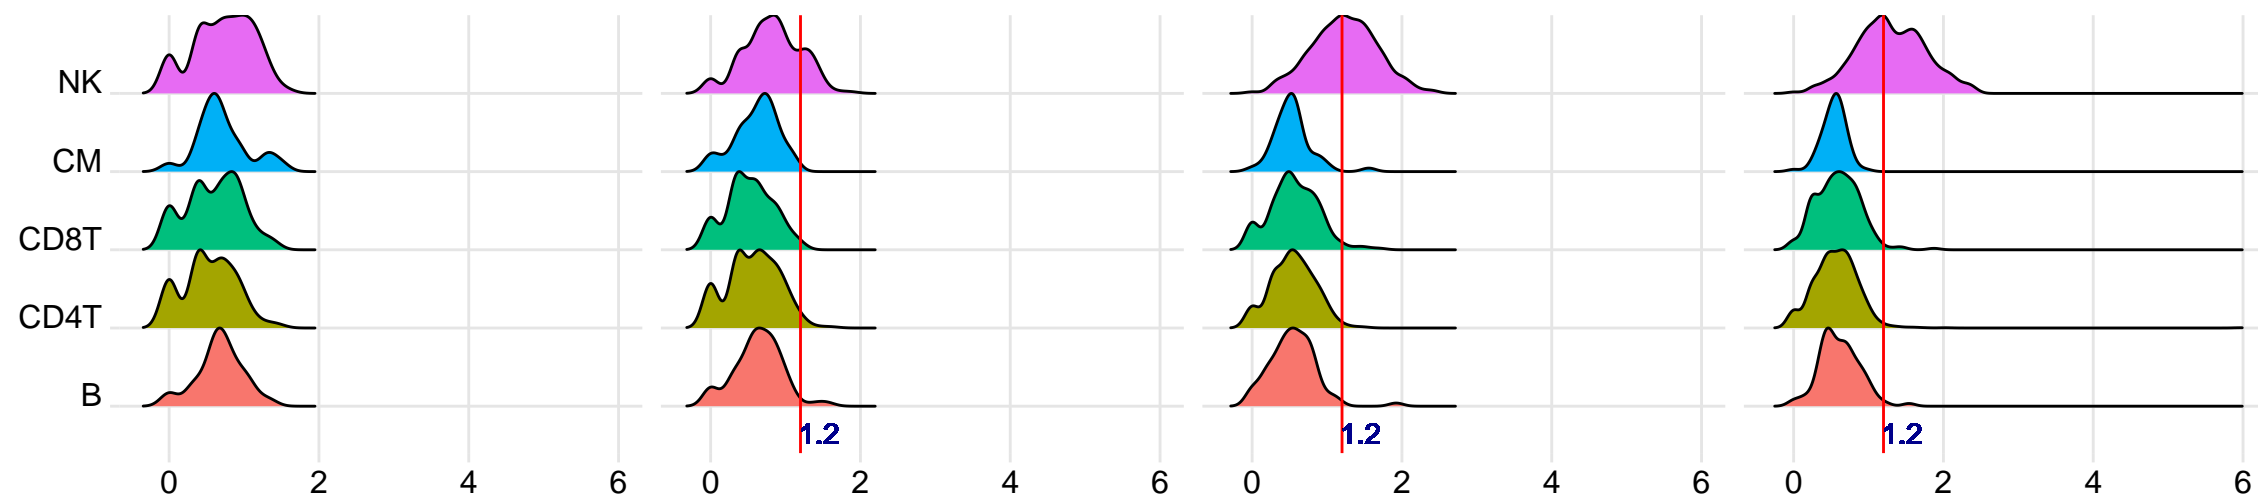**CD35**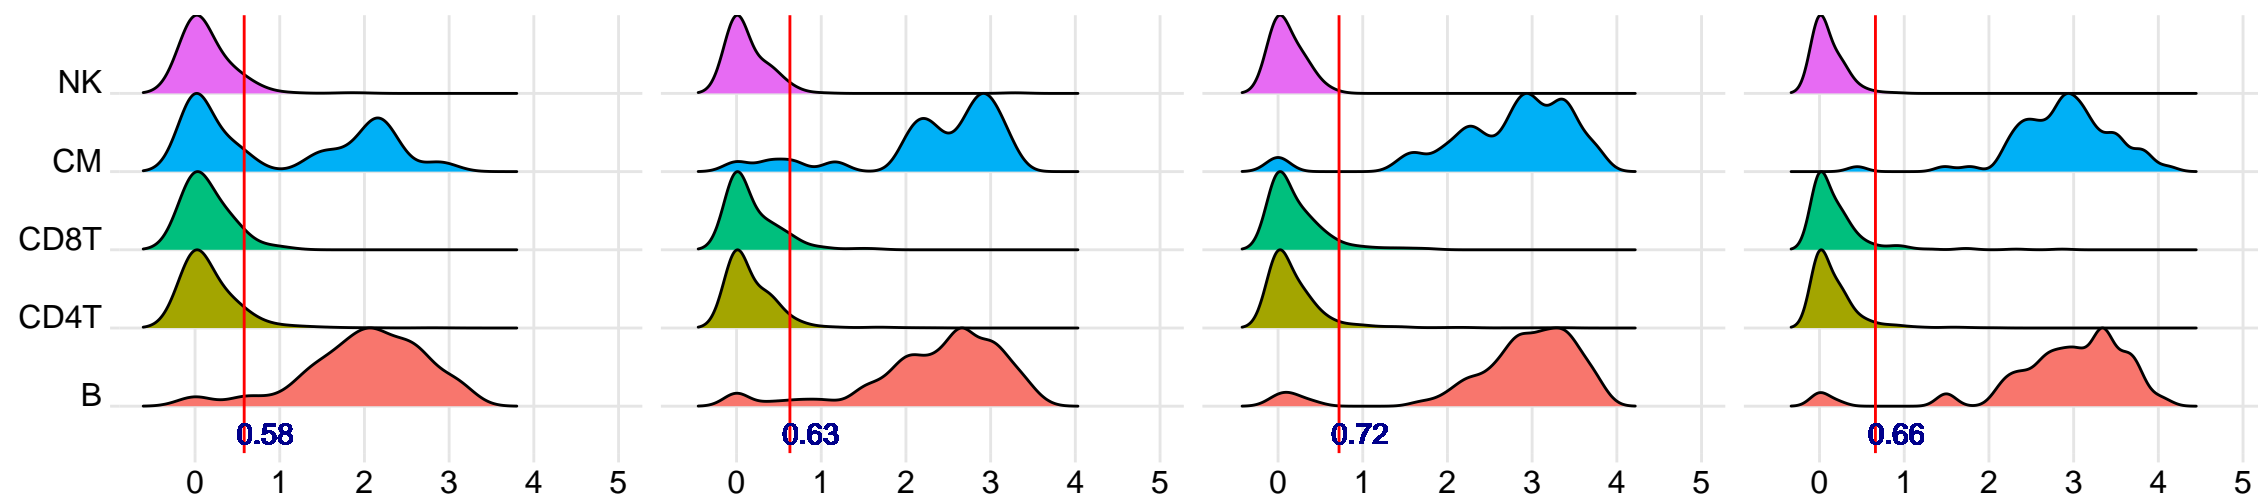**CD36**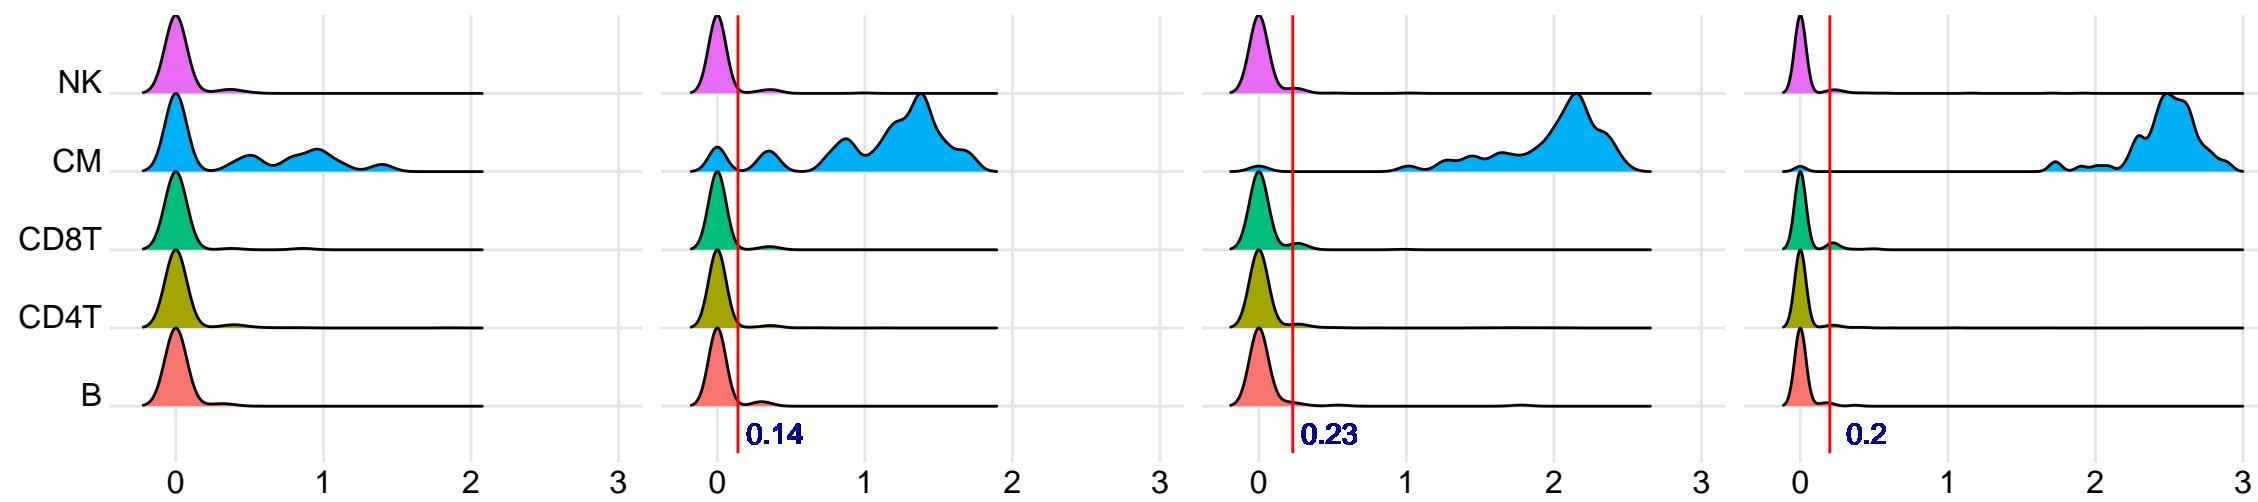**CD360**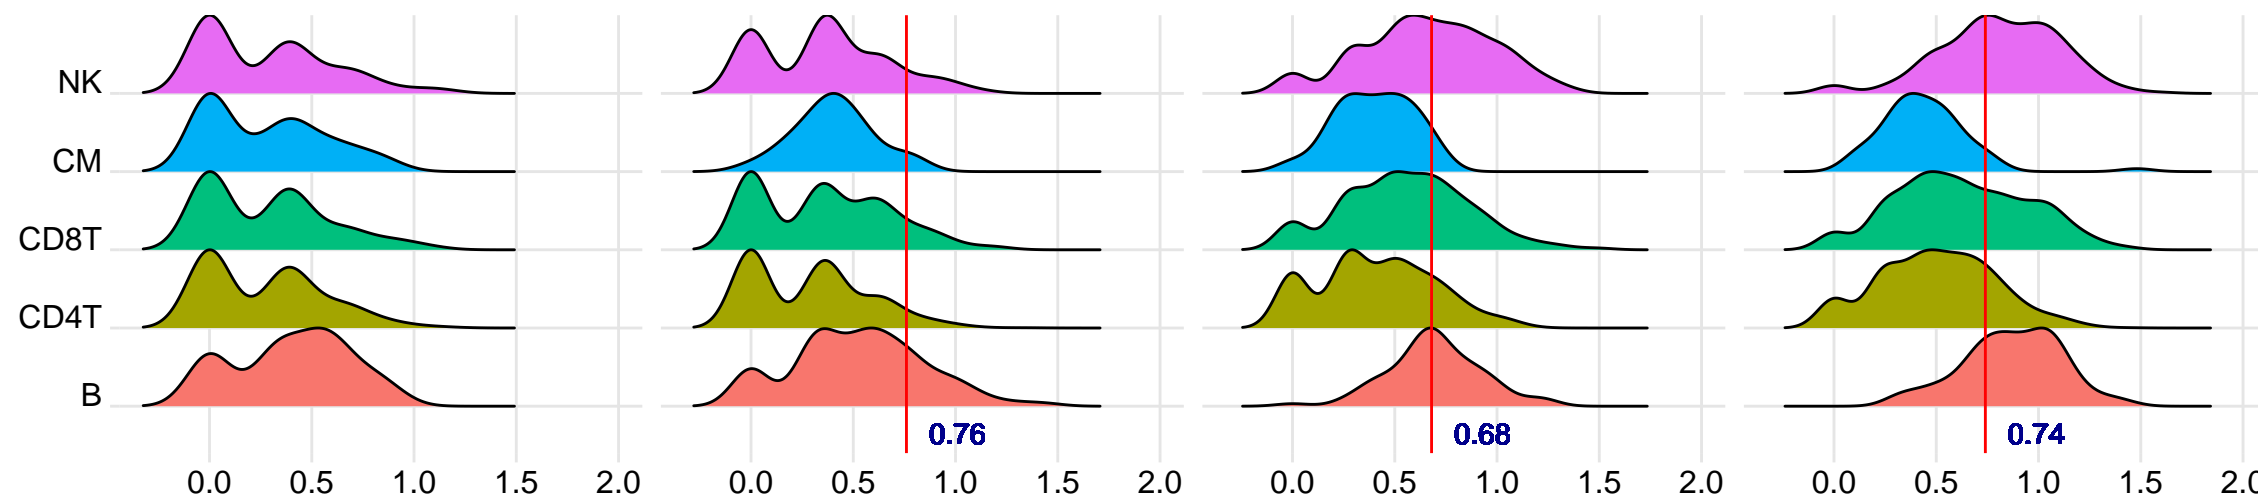**CD366**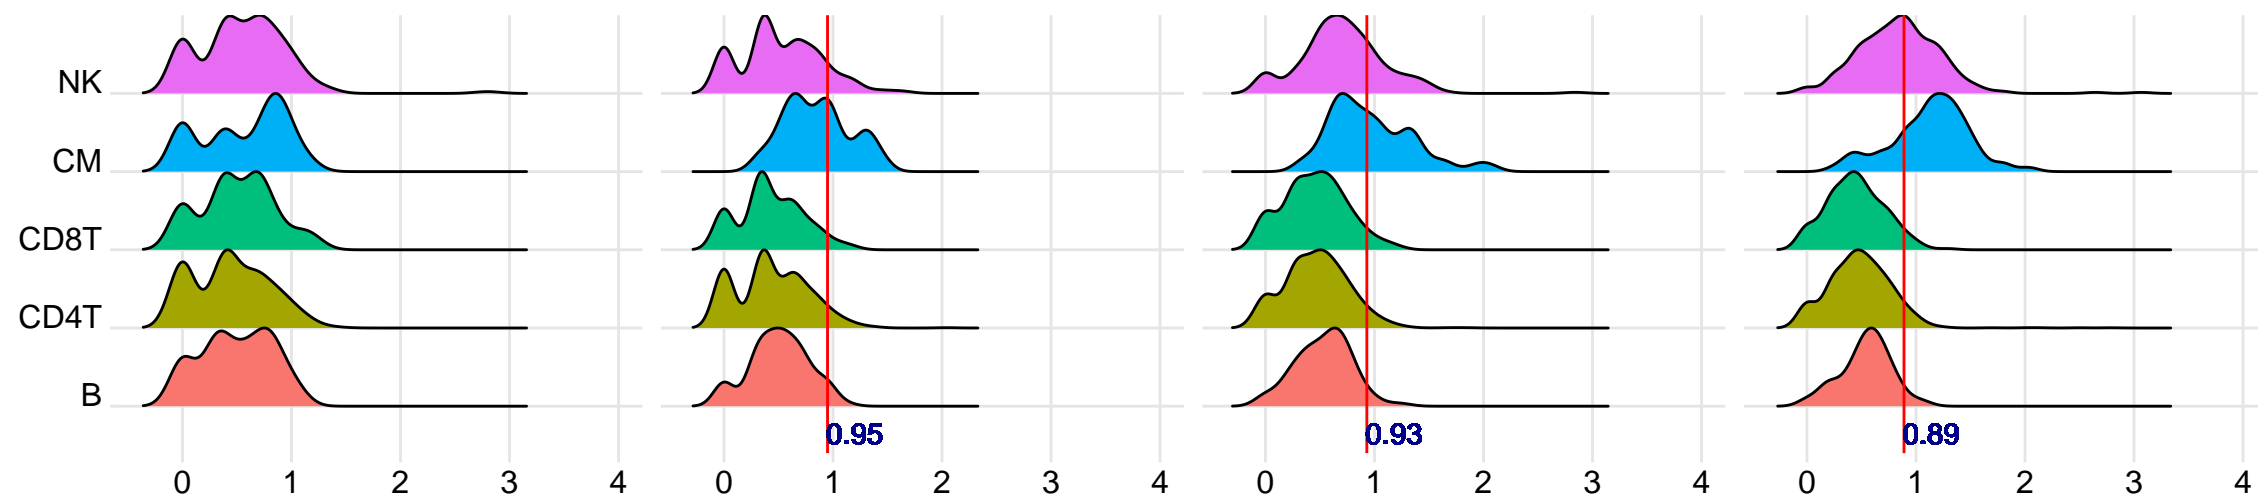

**CD38**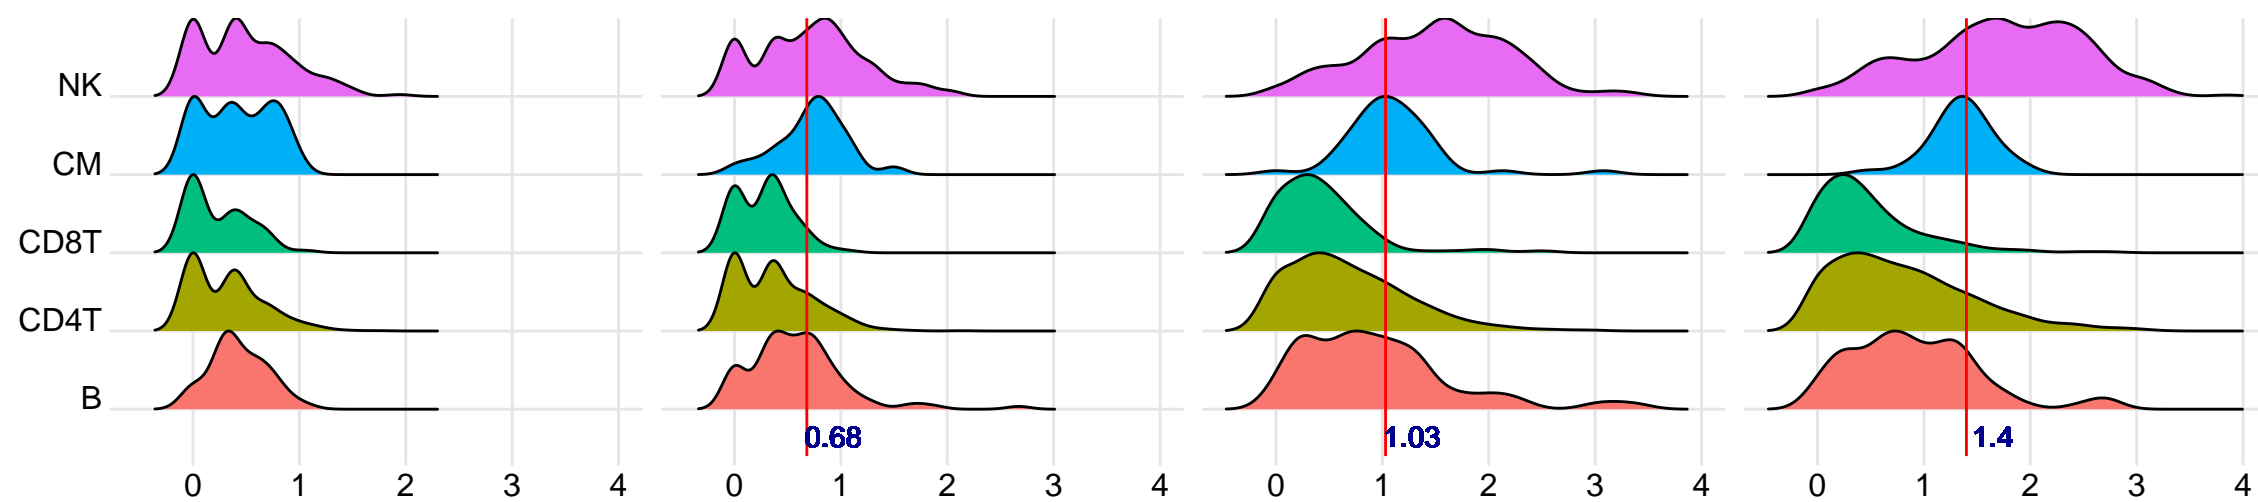**CD39**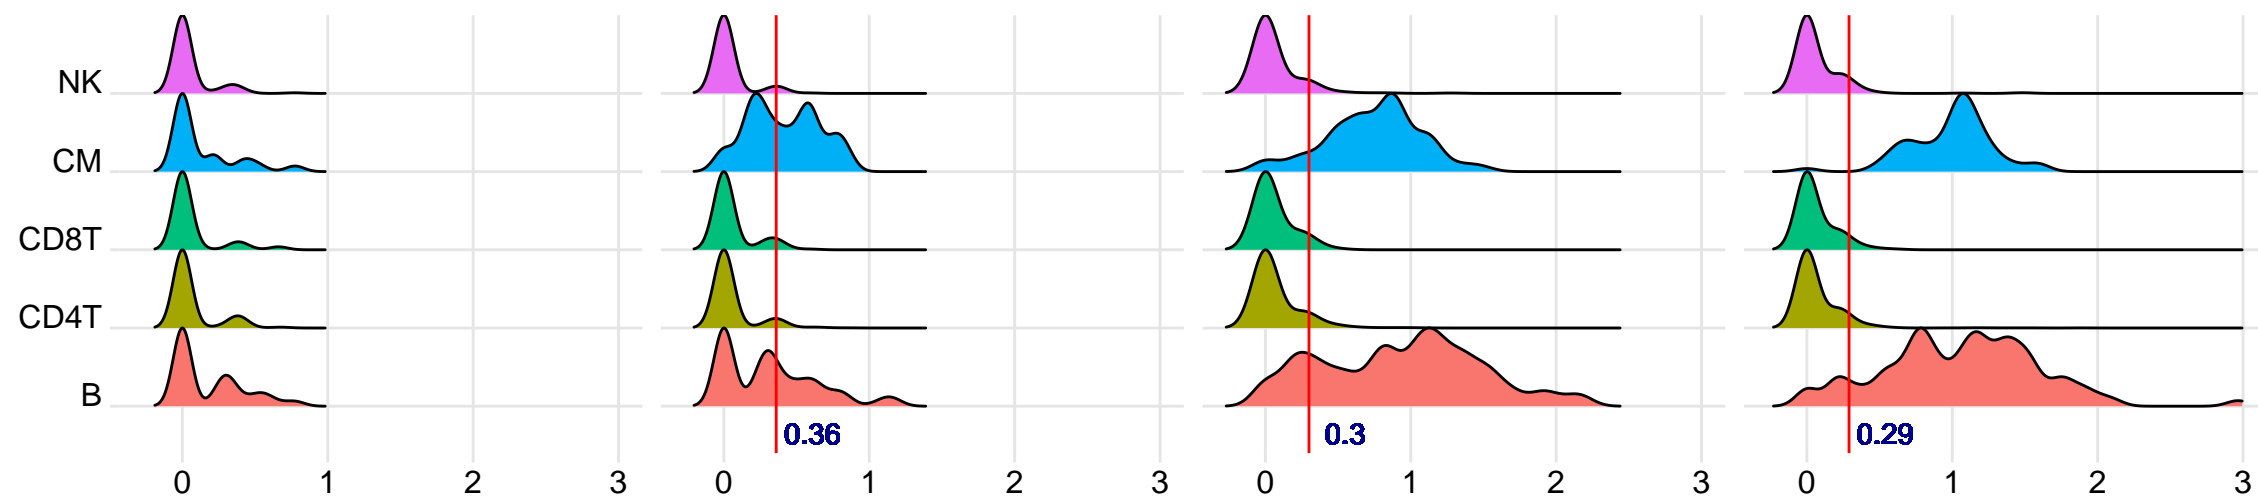**CD4**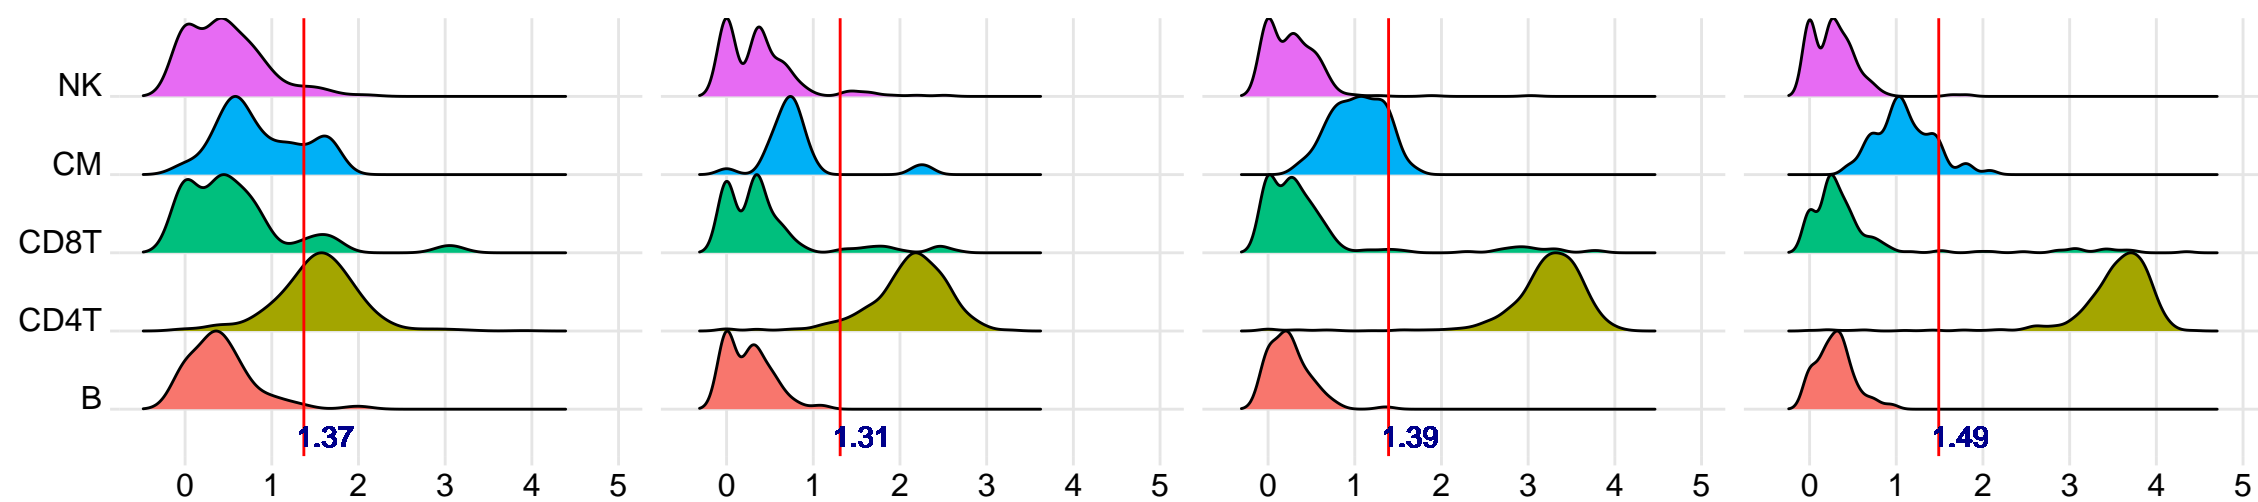**CD40**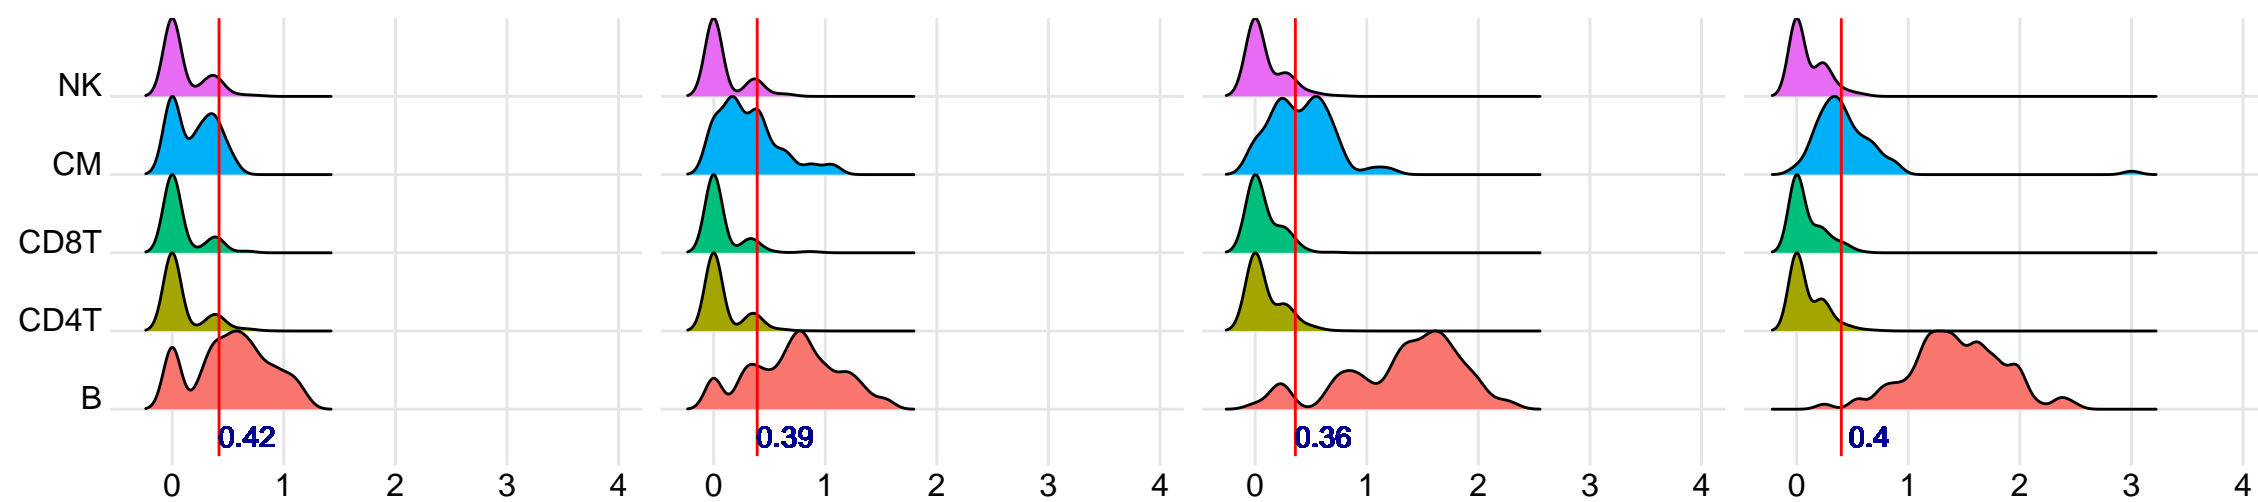**CD41**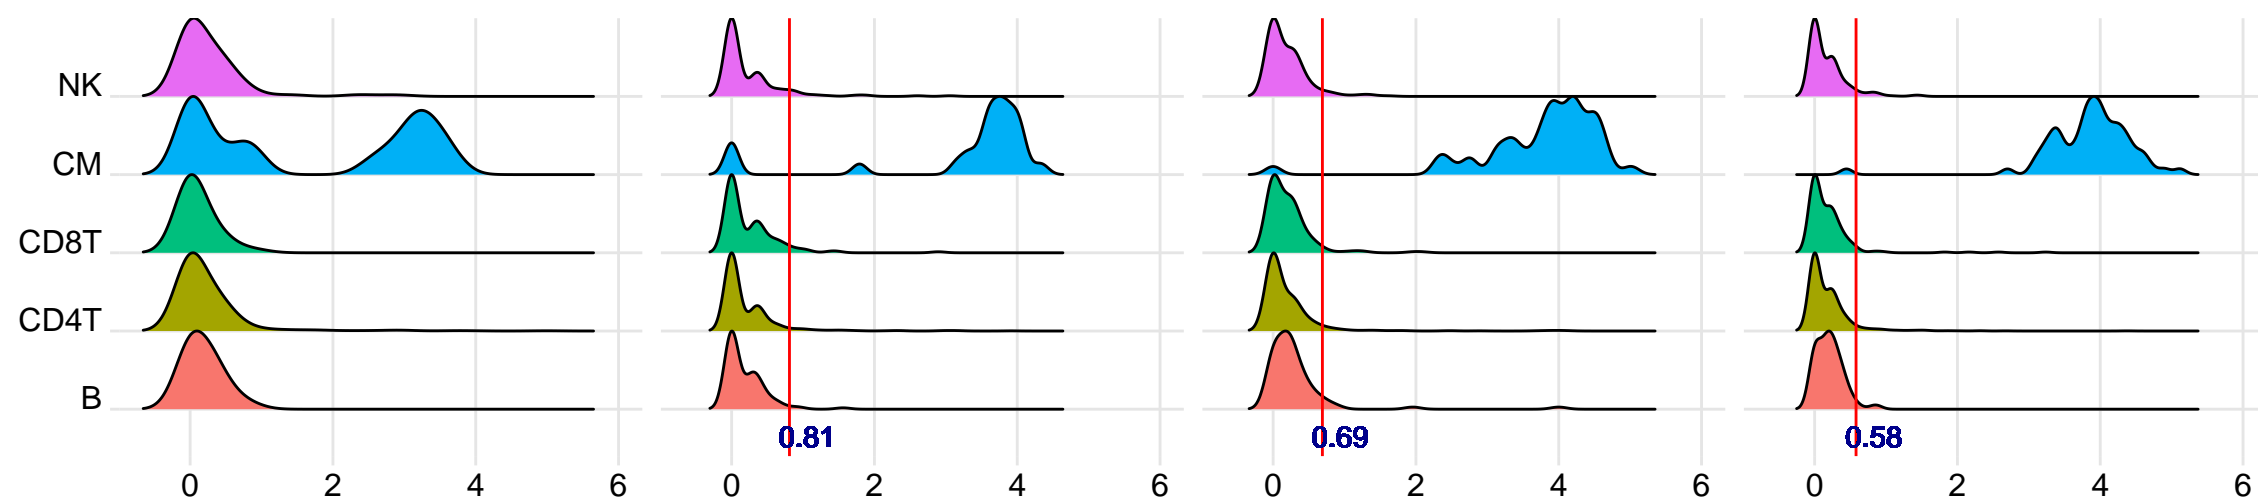

**CD44**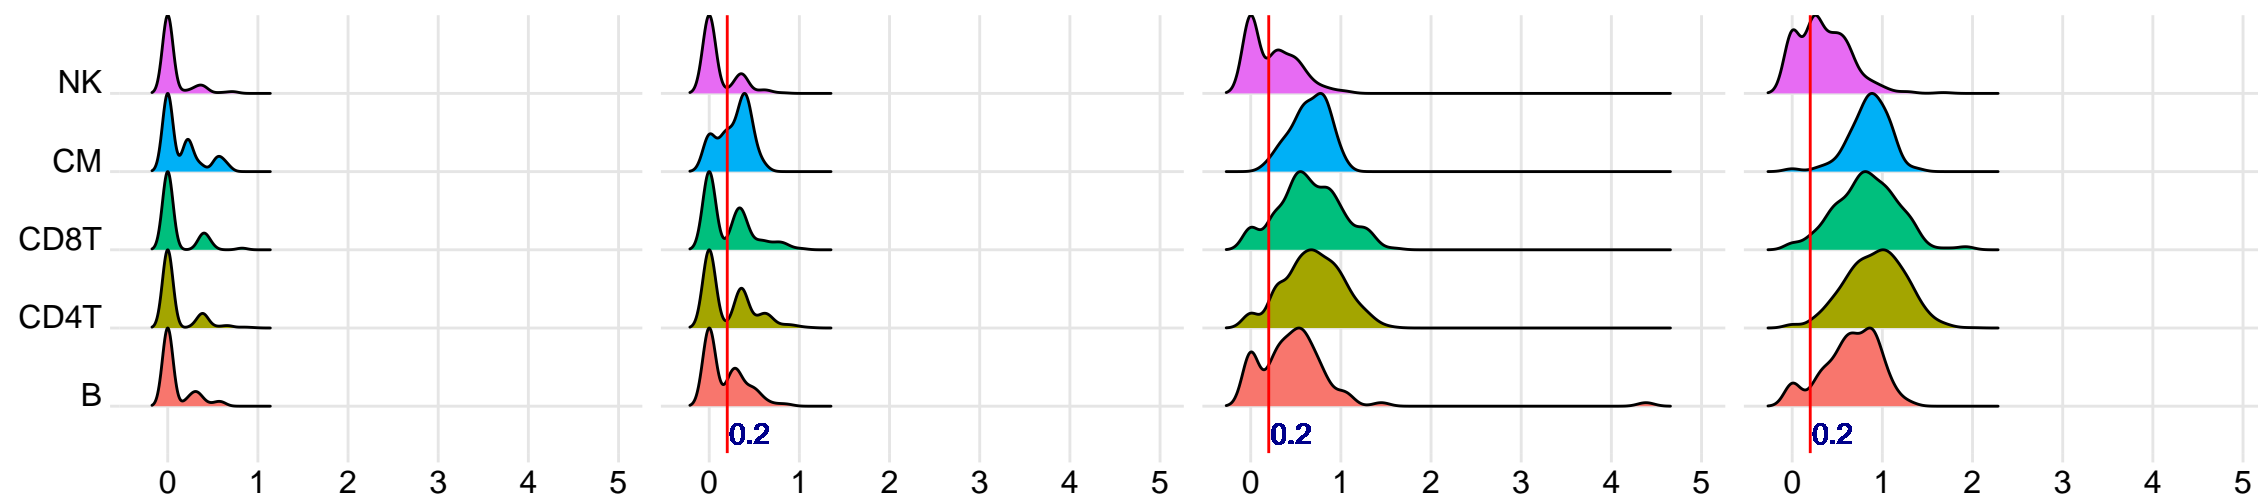**CD45**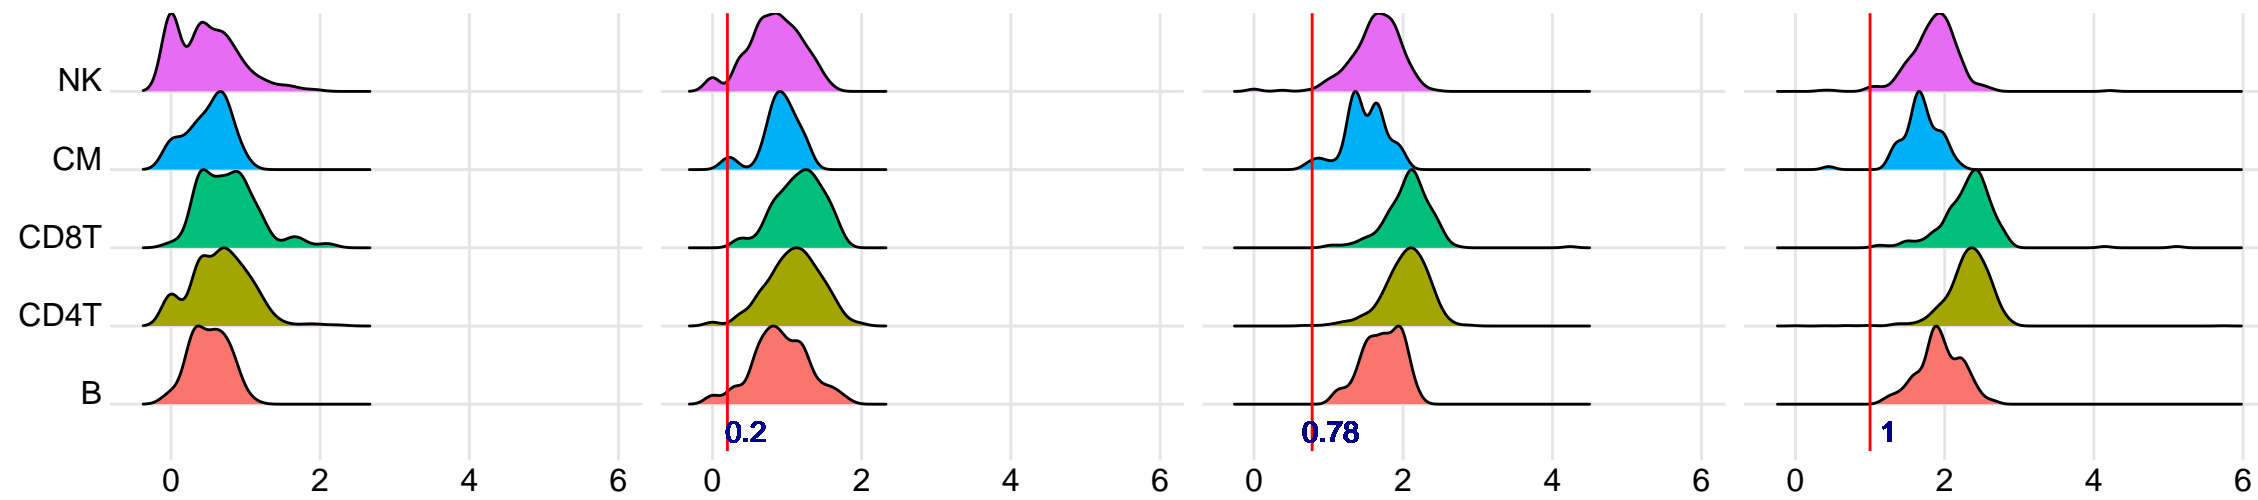**CD45RA**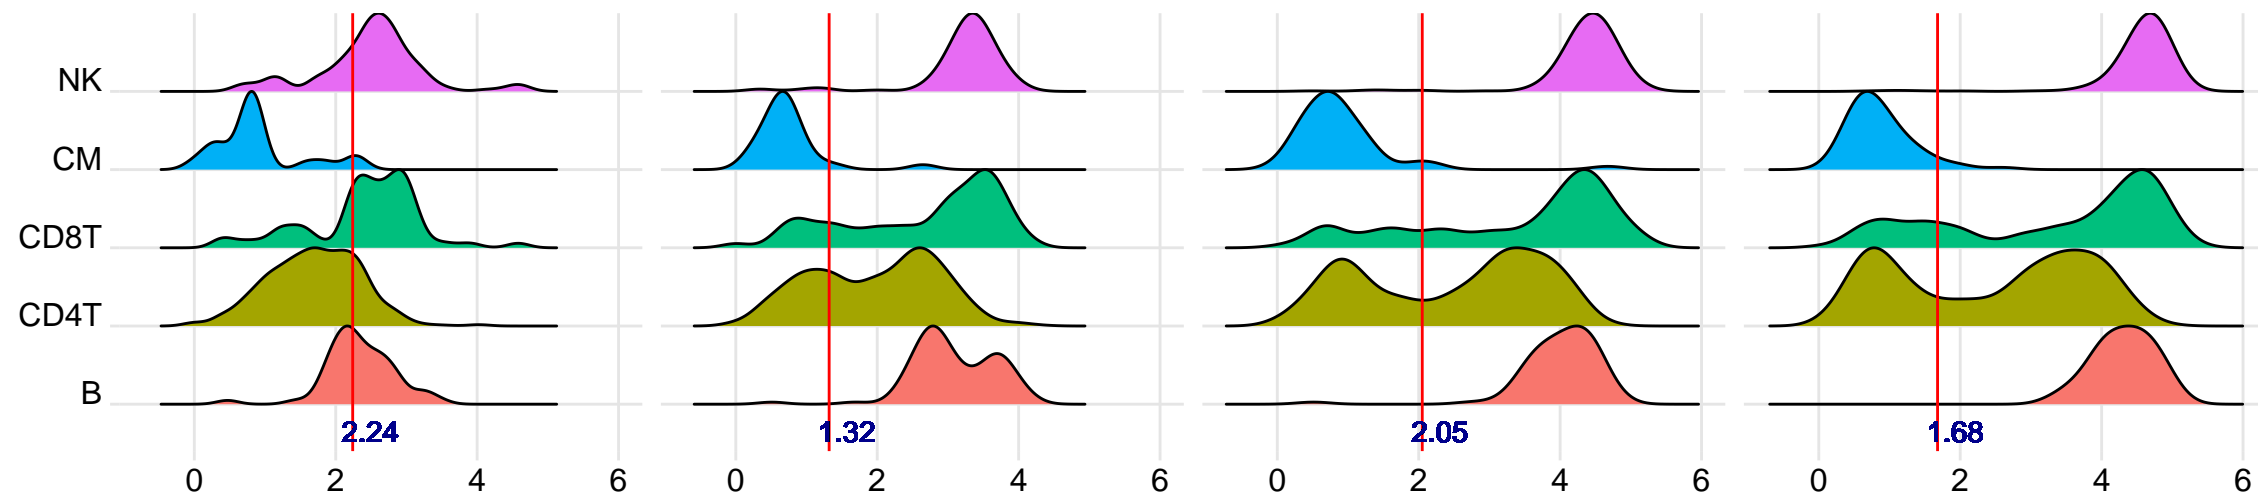**CD45RO**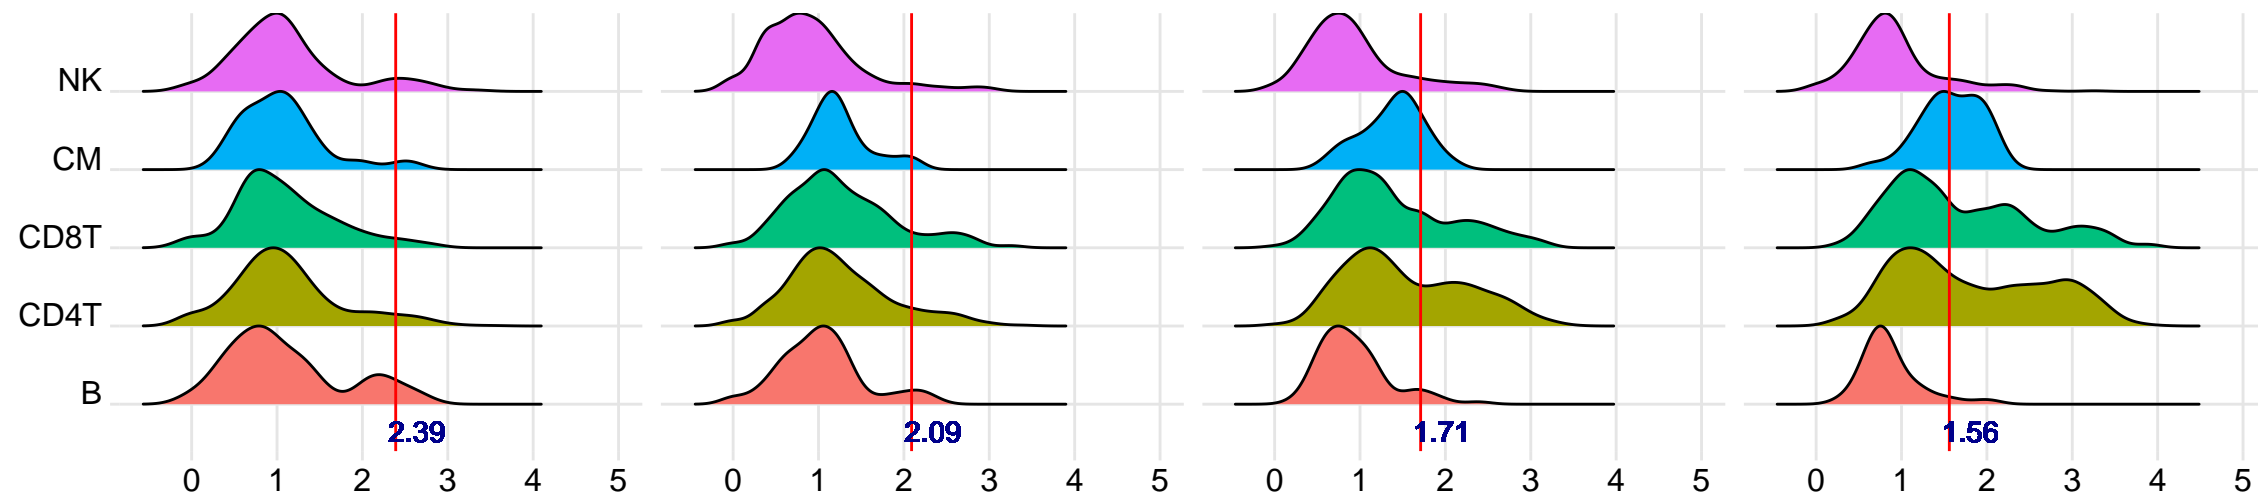**CD47**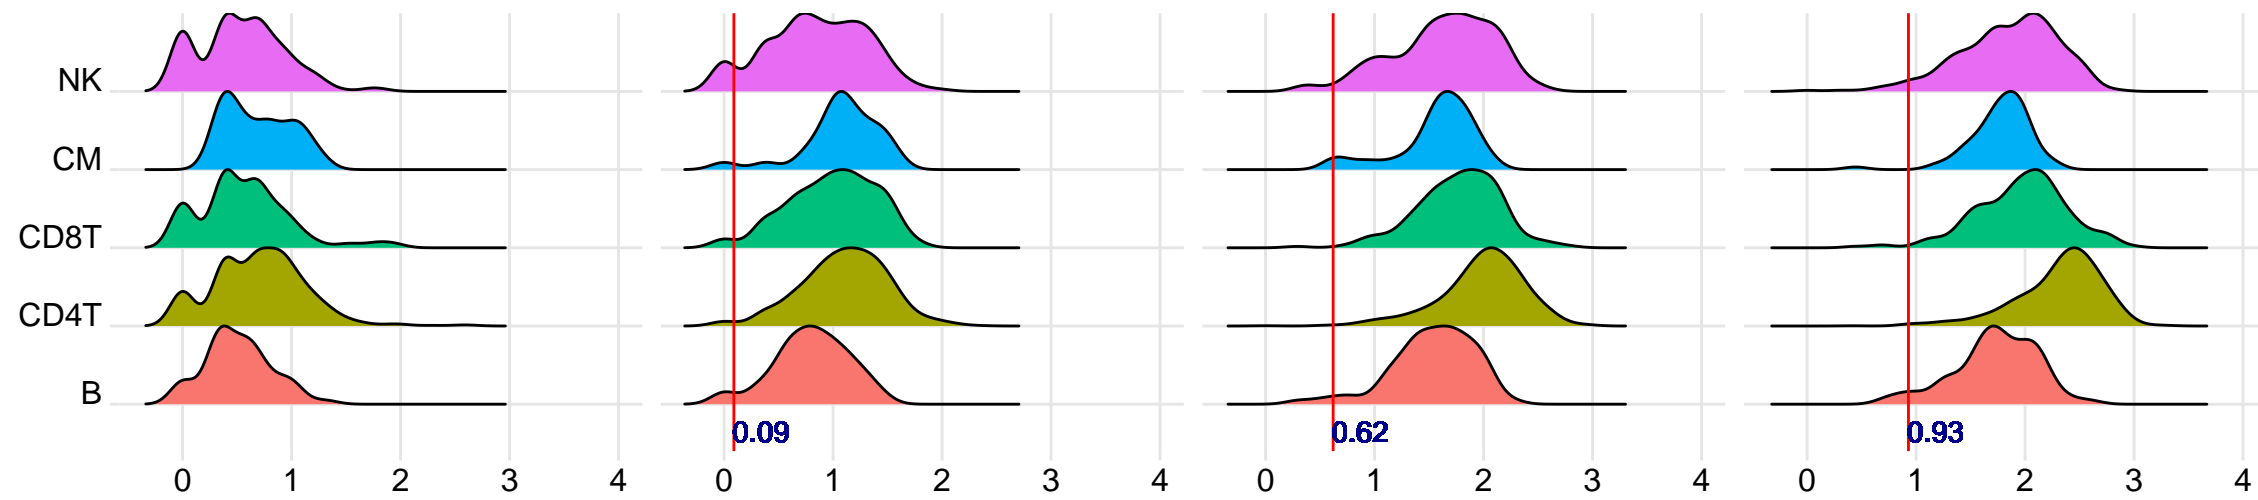

**CD49b**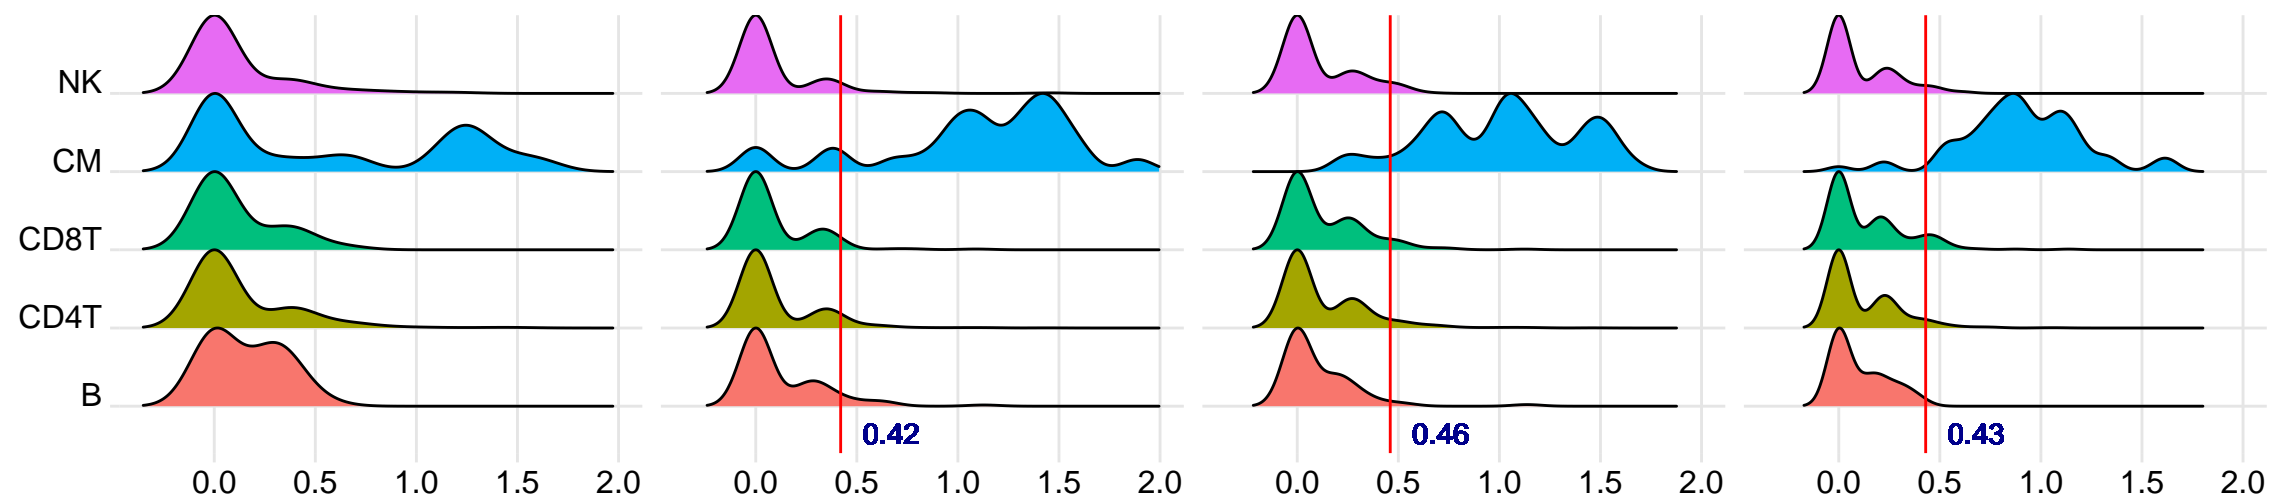**CD49d**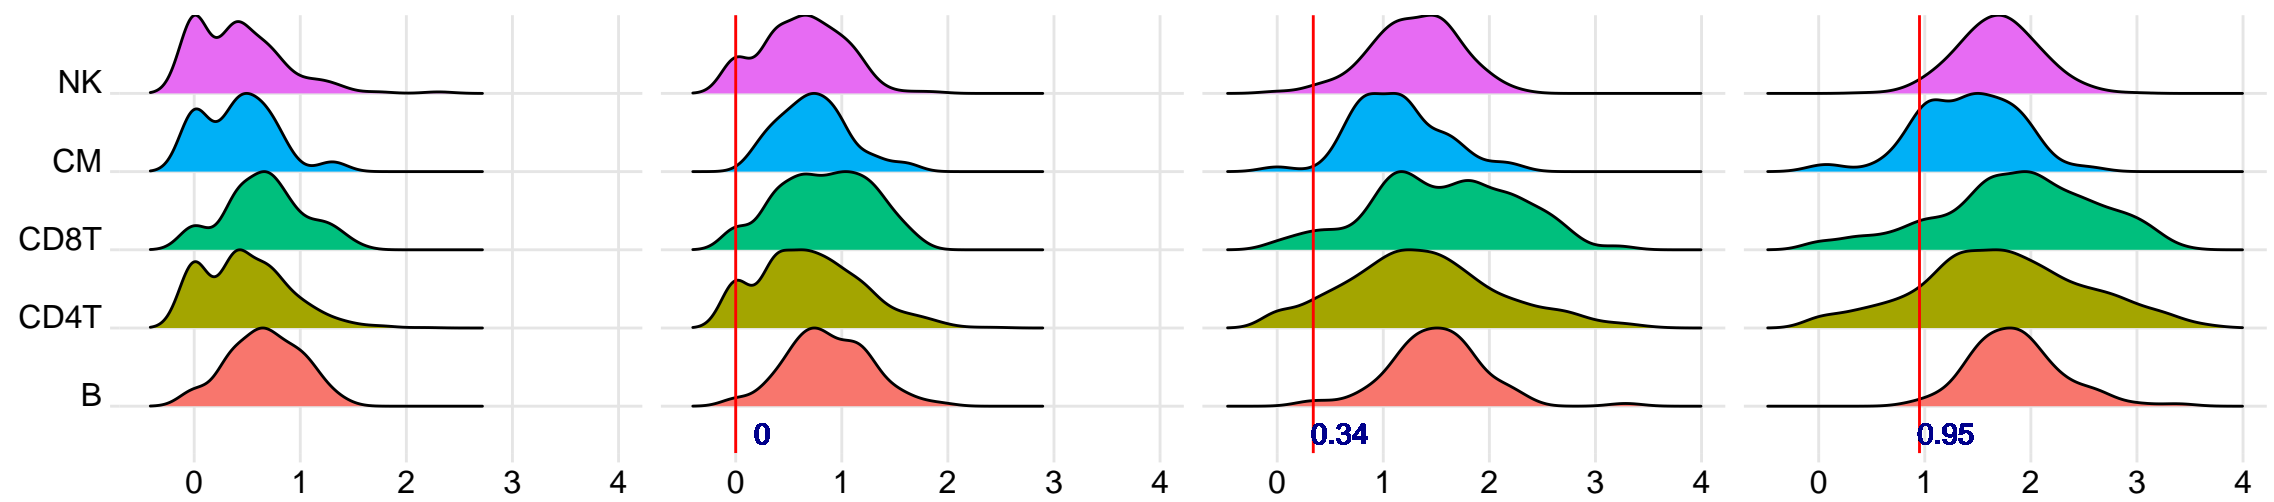**CD49f**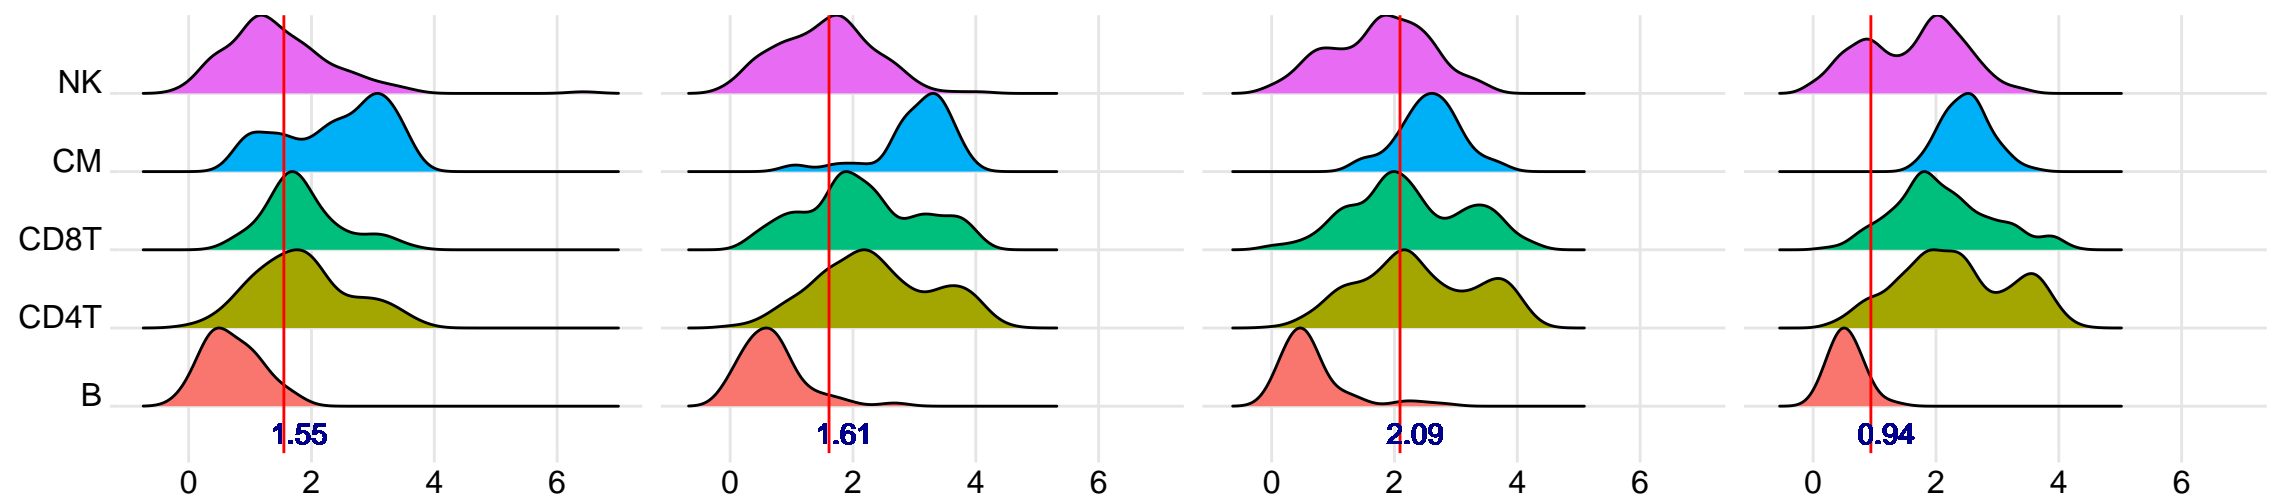**CD5**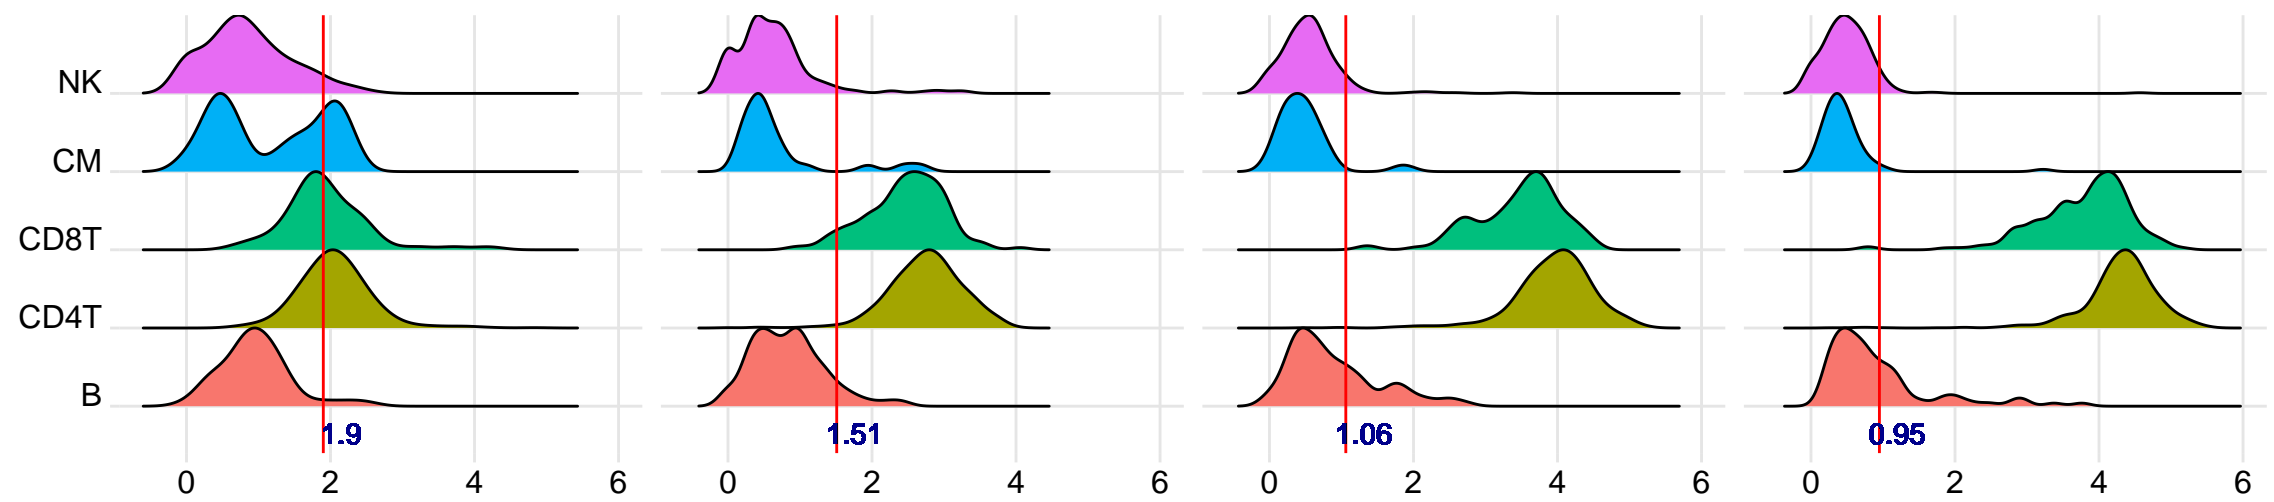**CD52**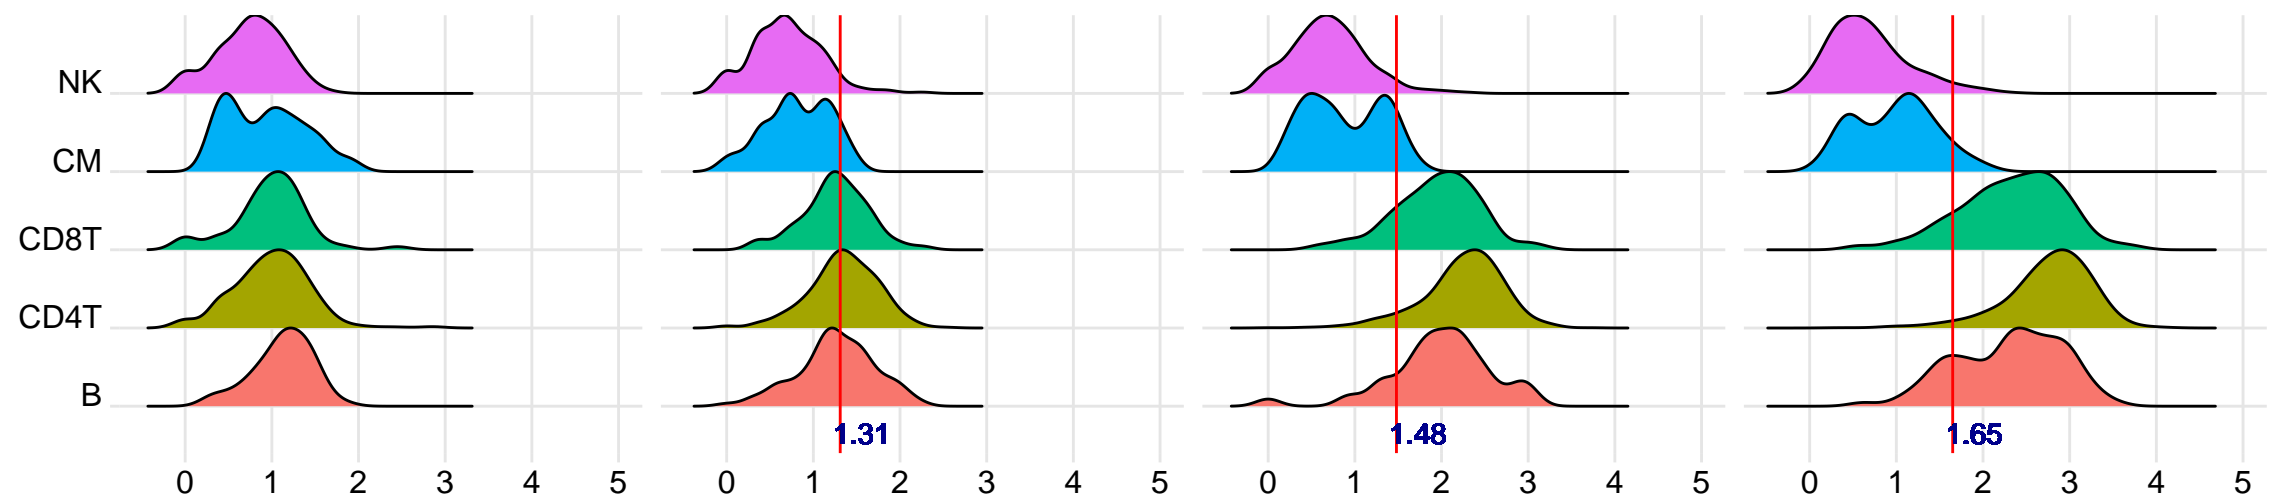

**CD54**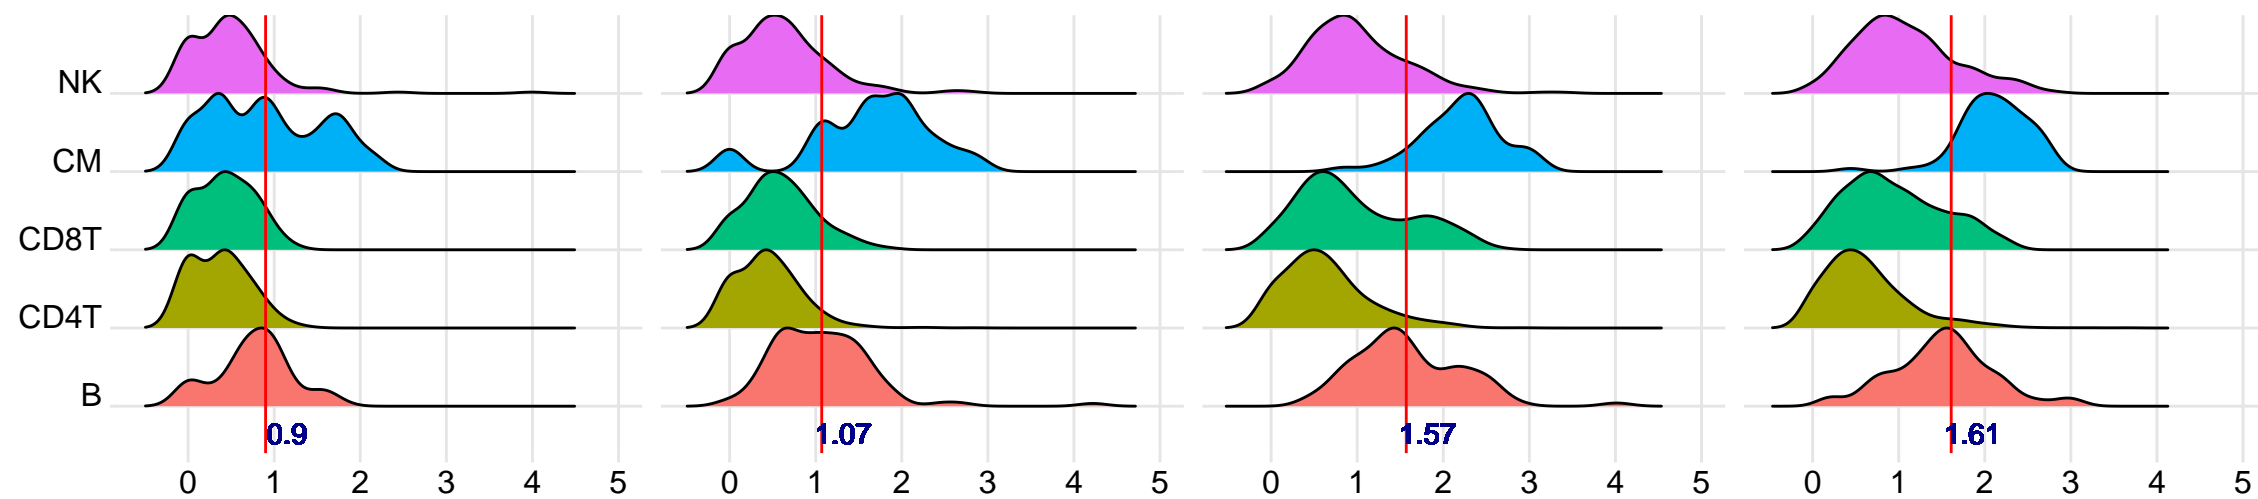**CD56**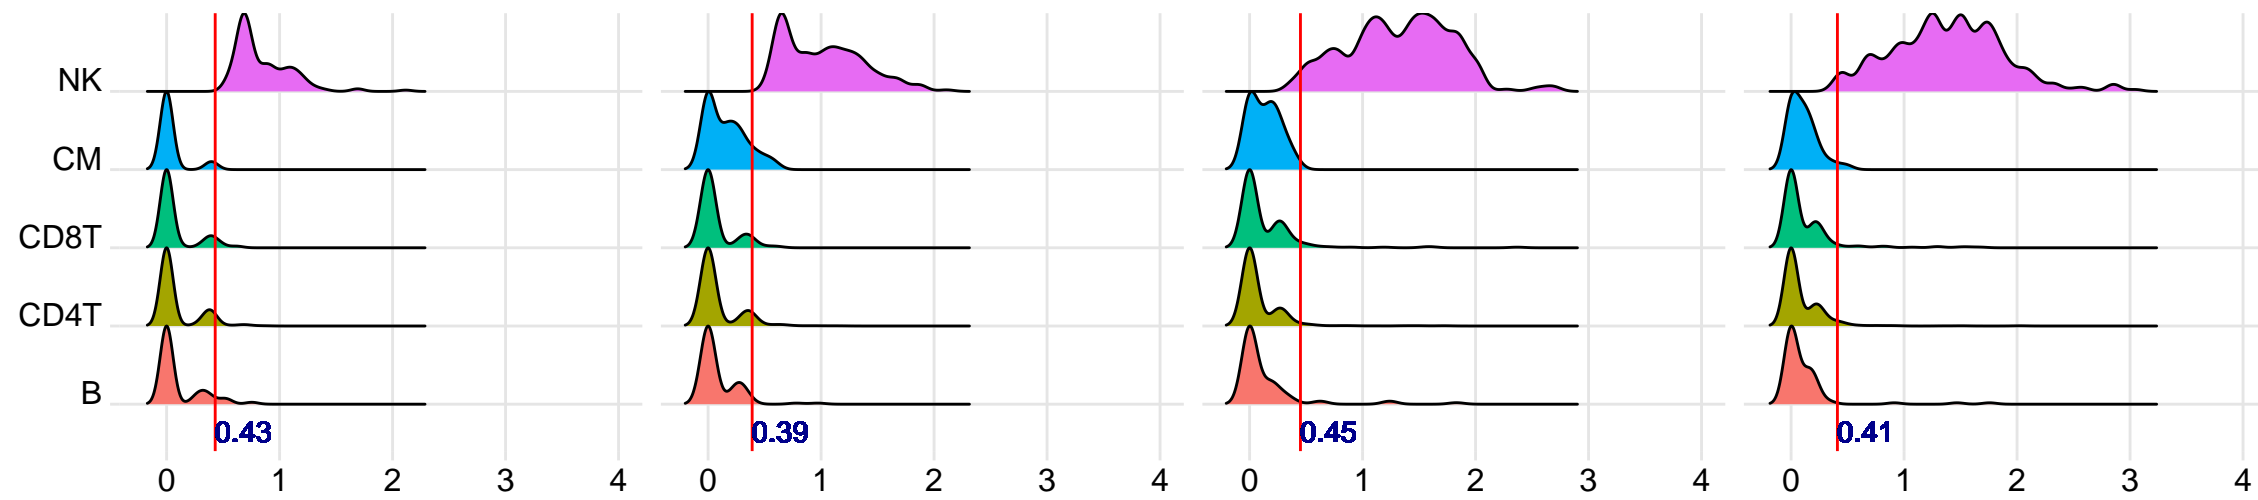**CD57.Recombinant**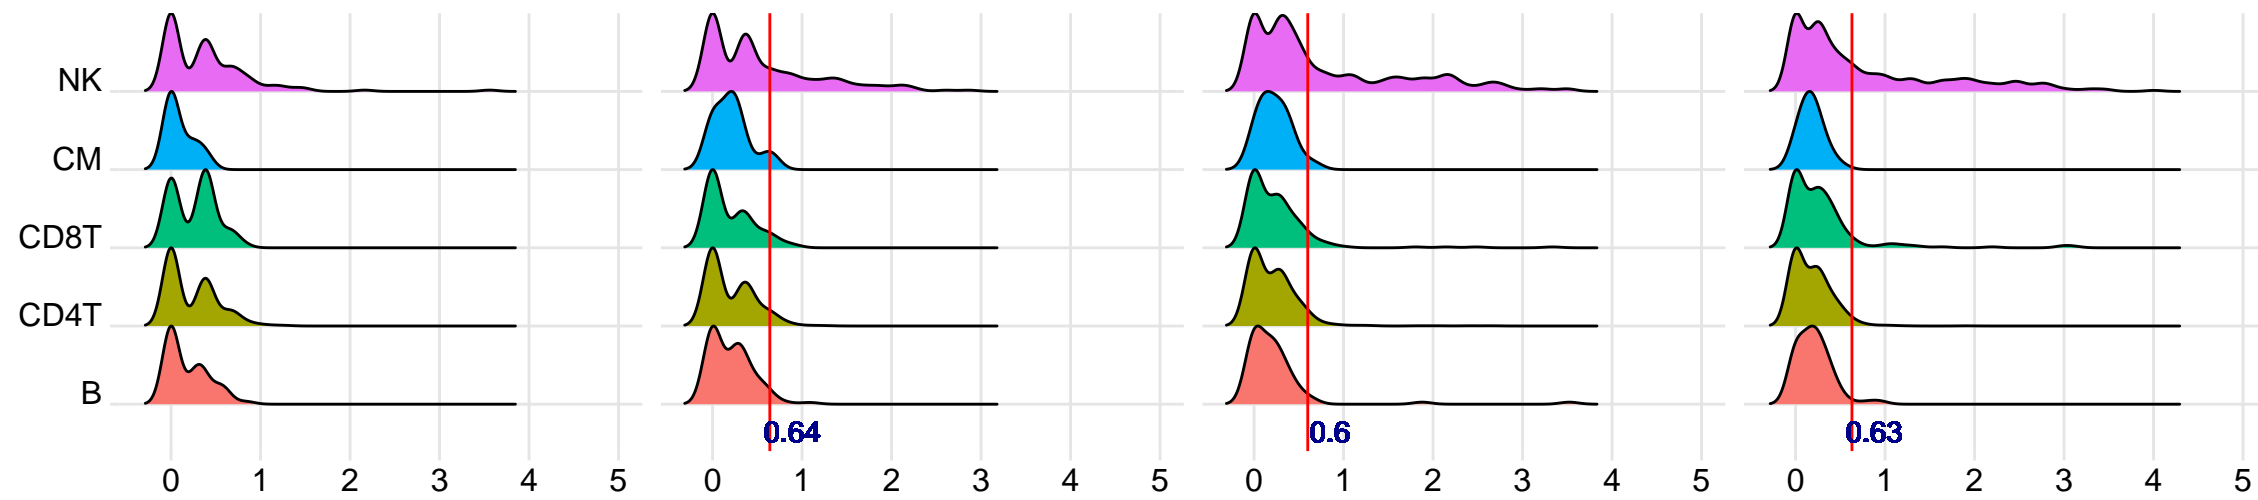**CD58**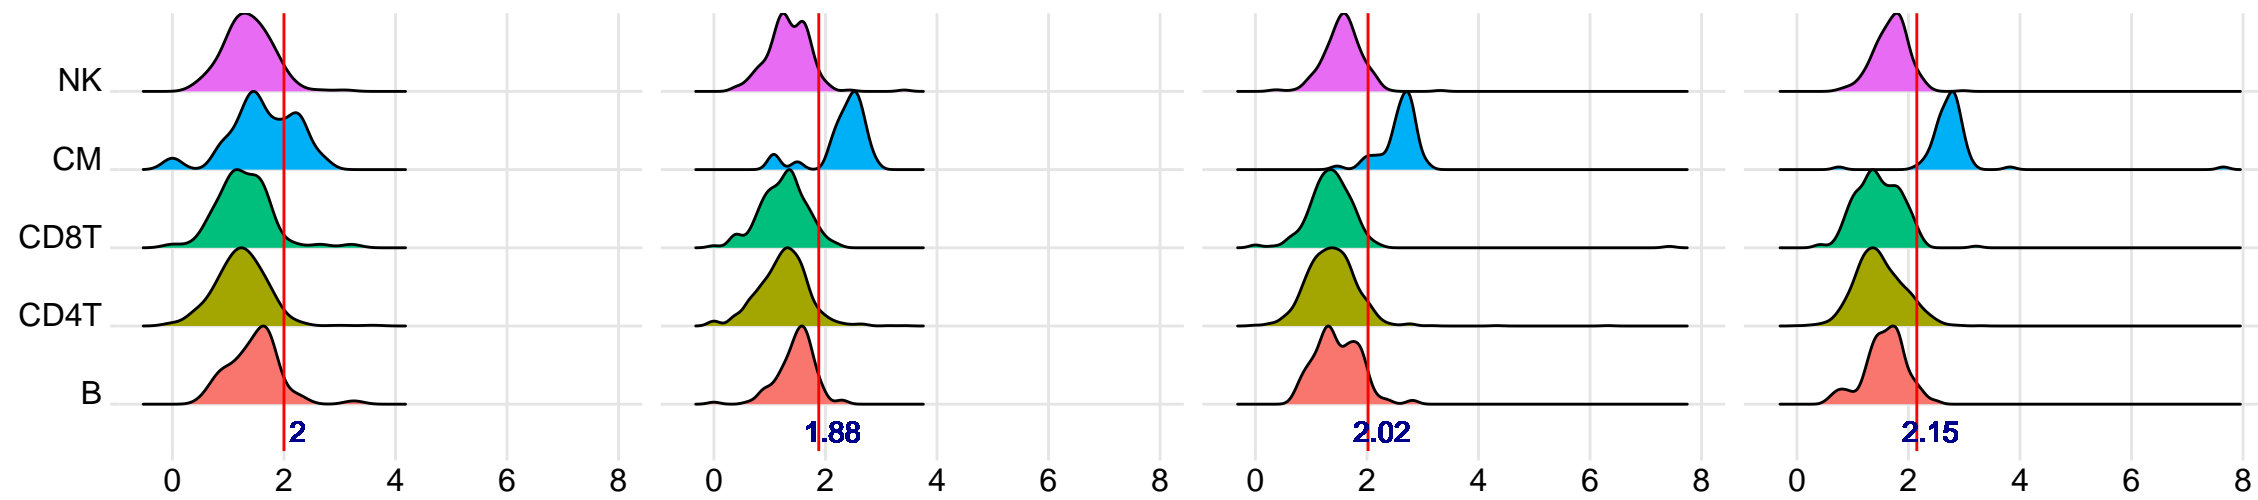**CD62L**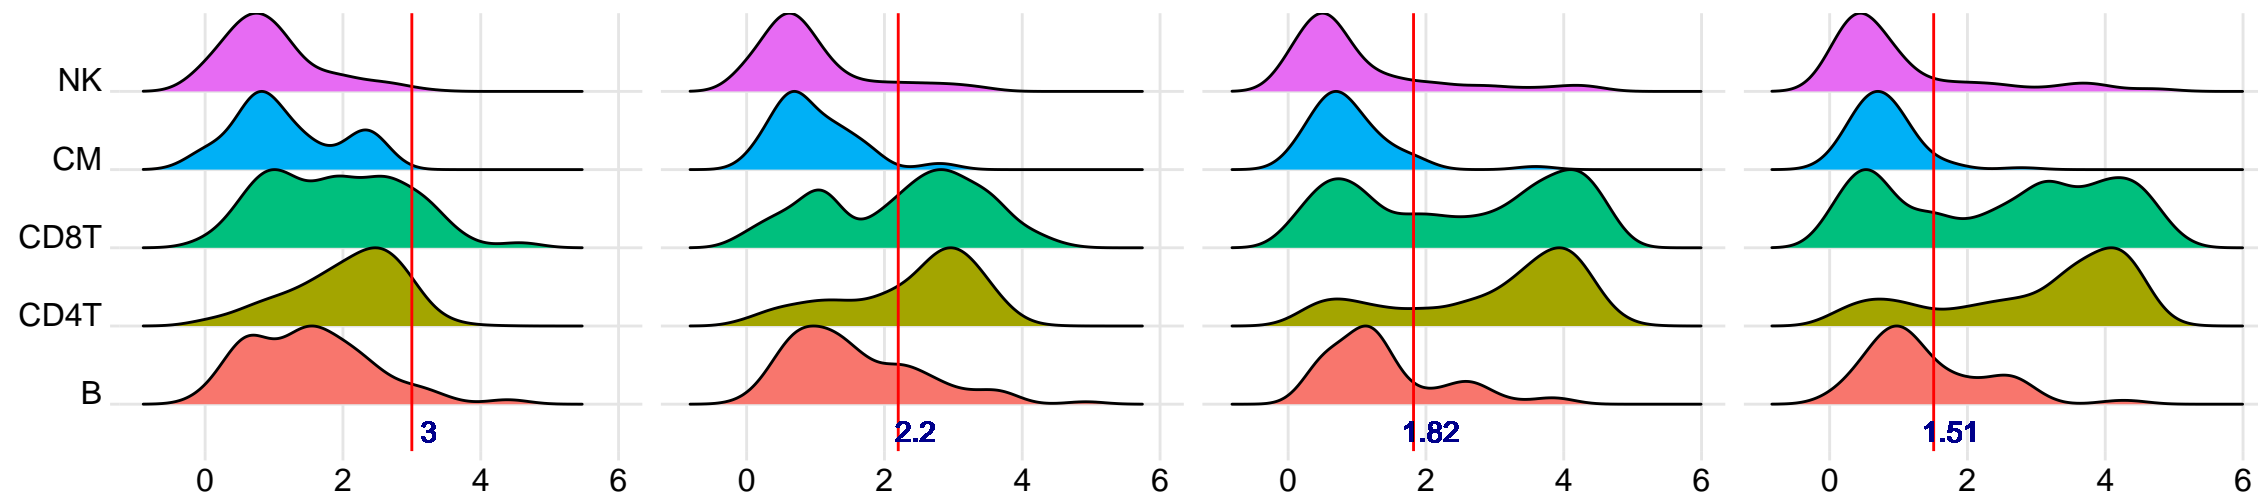



**CD62P**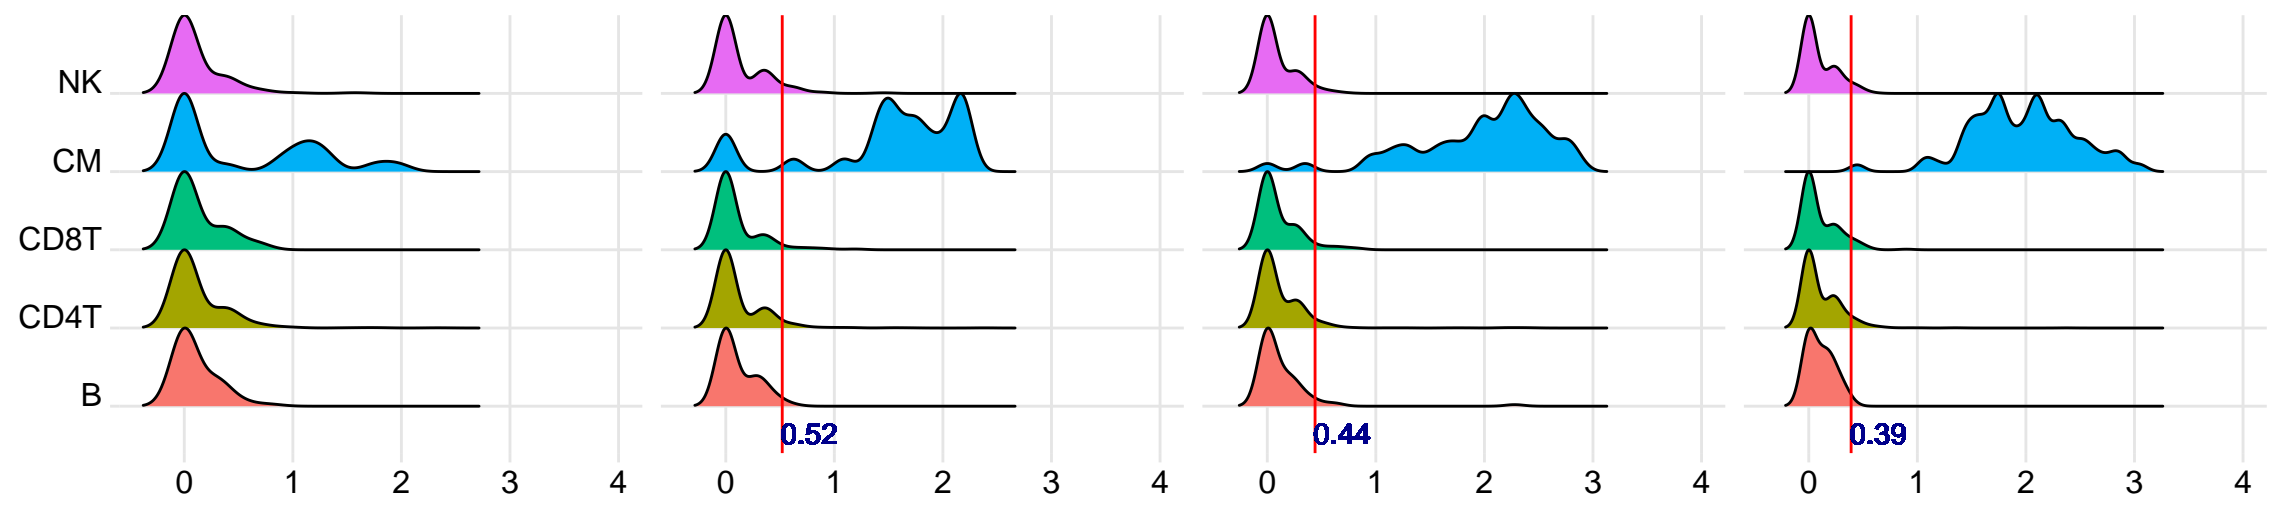**CD64**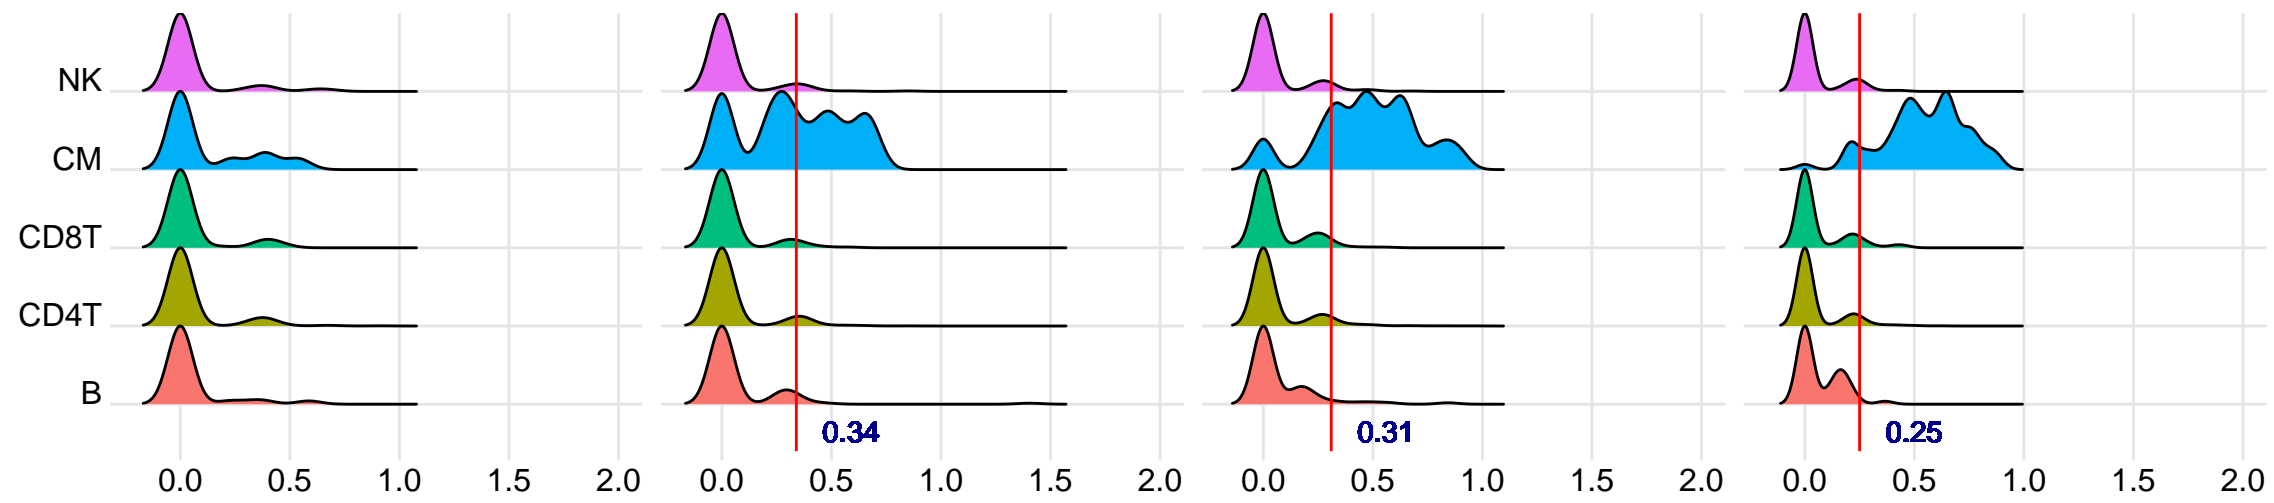**CD66a.c.e**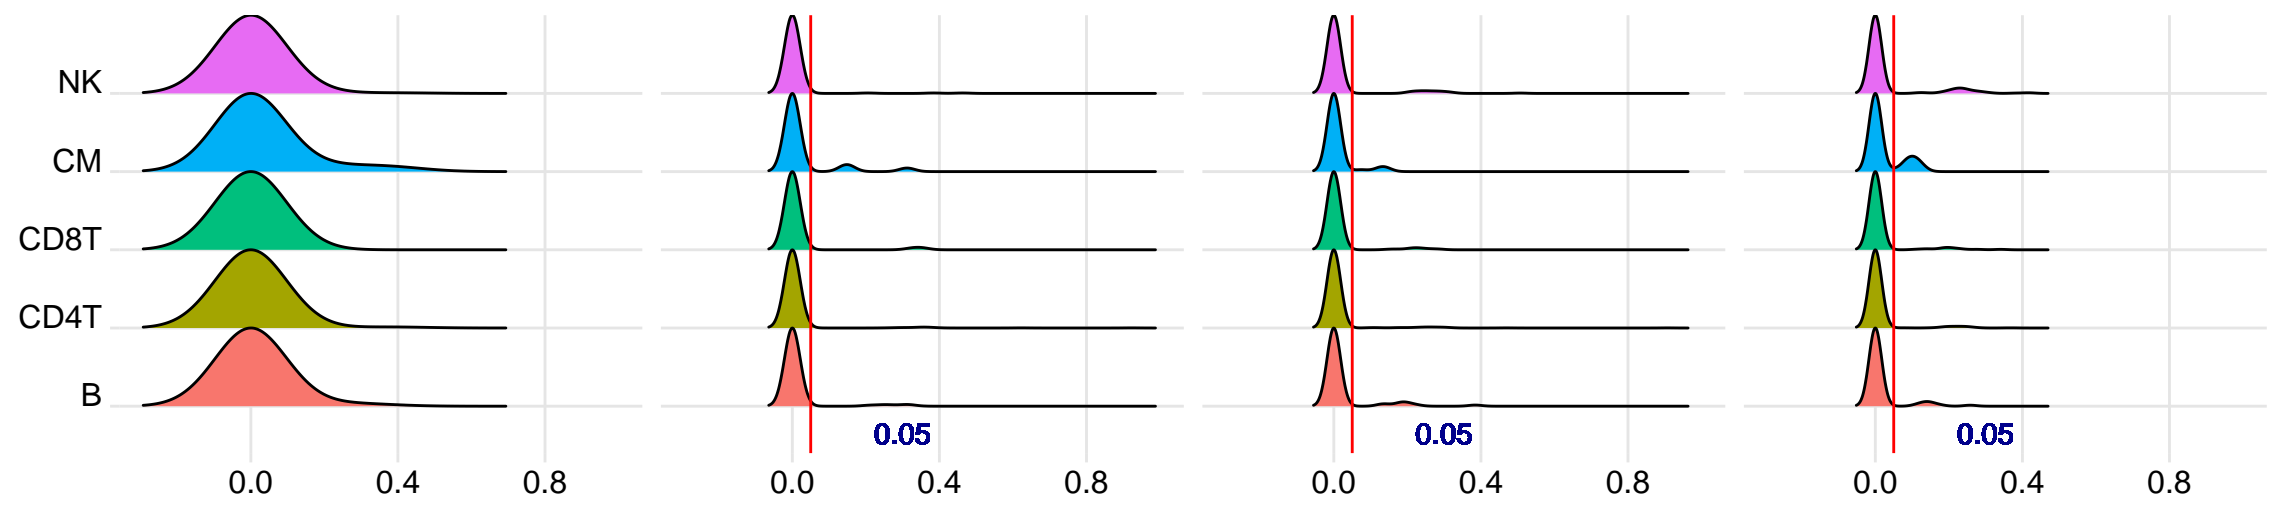**CD66b**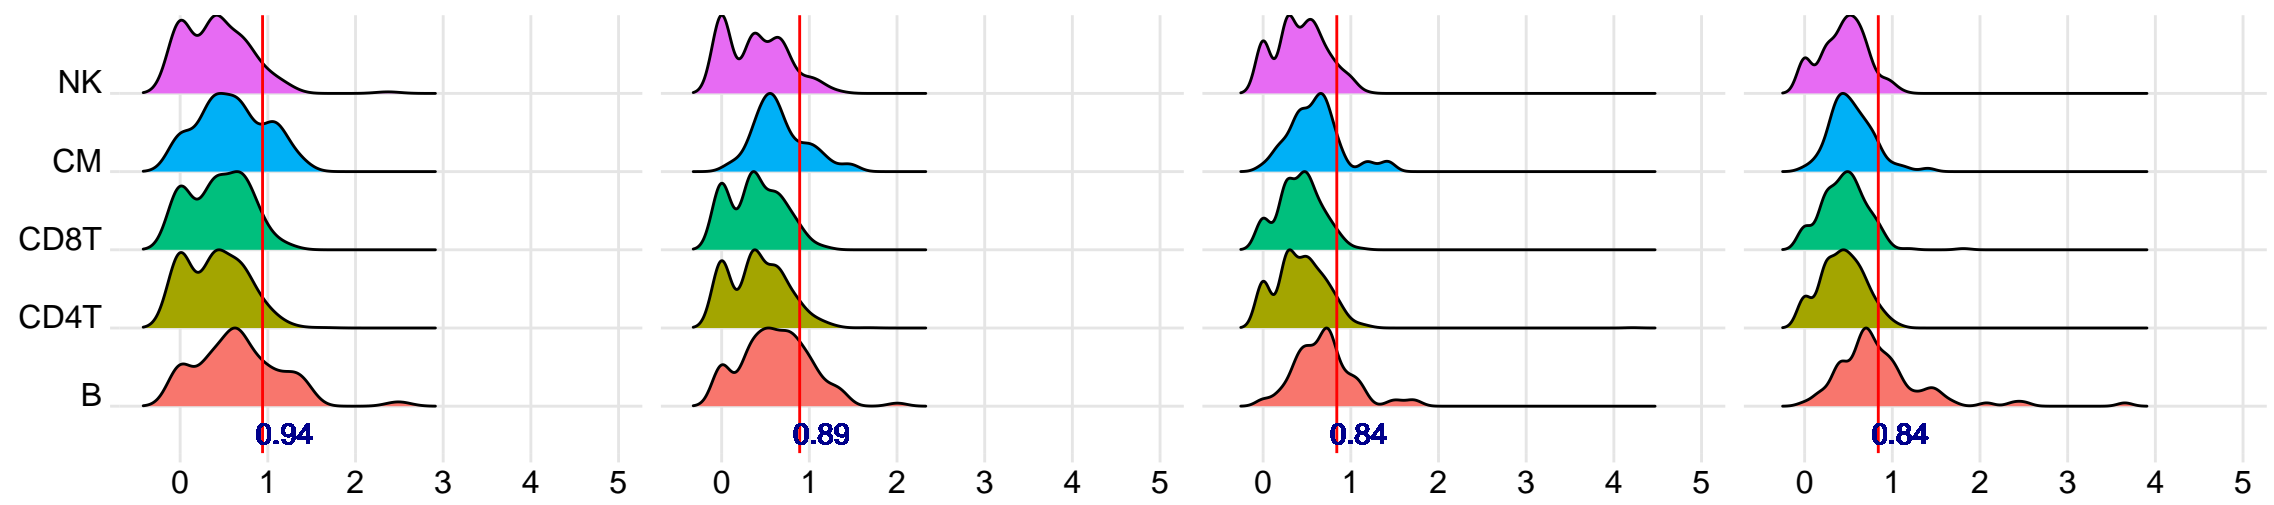**CD69**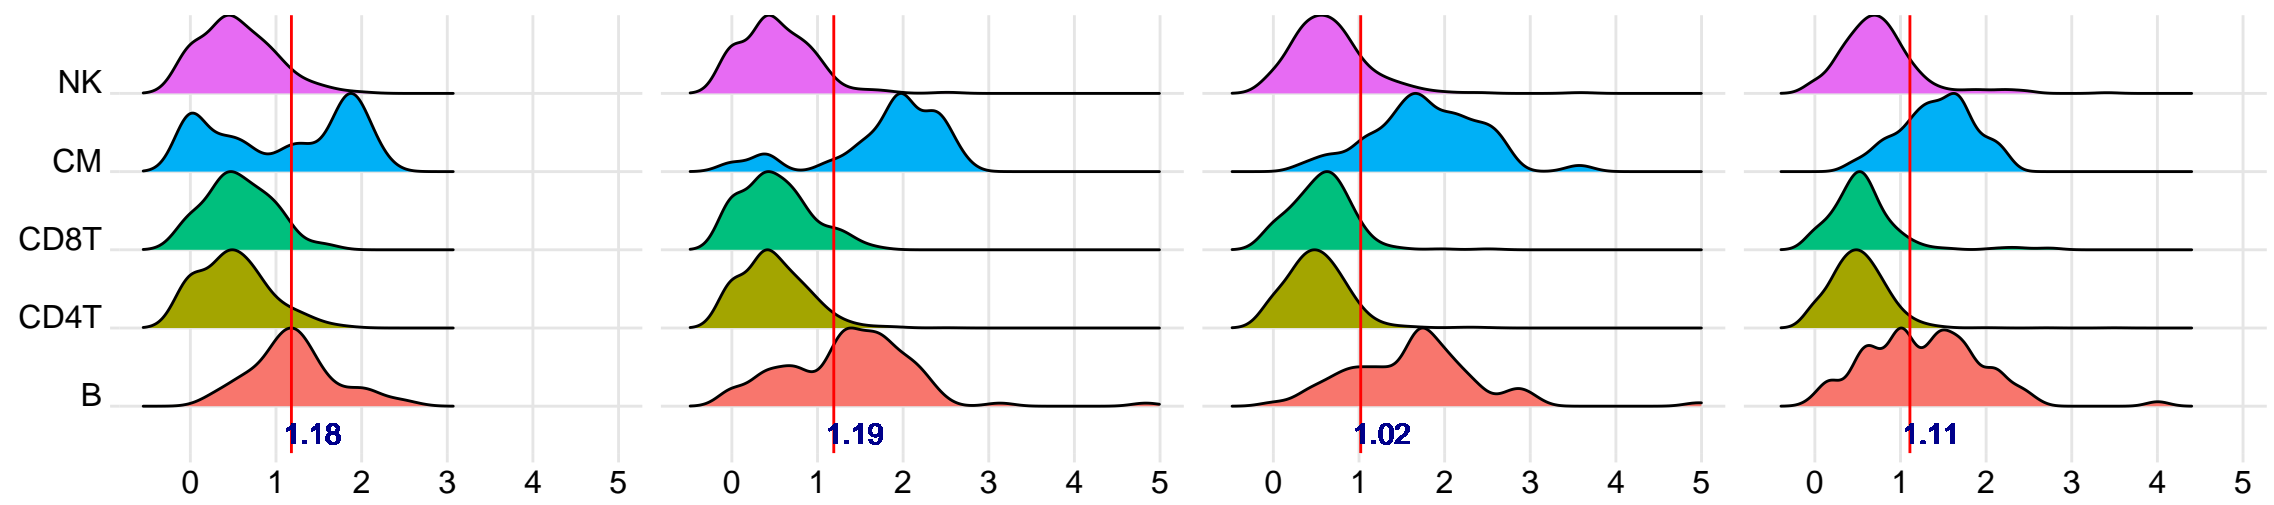

**CD7**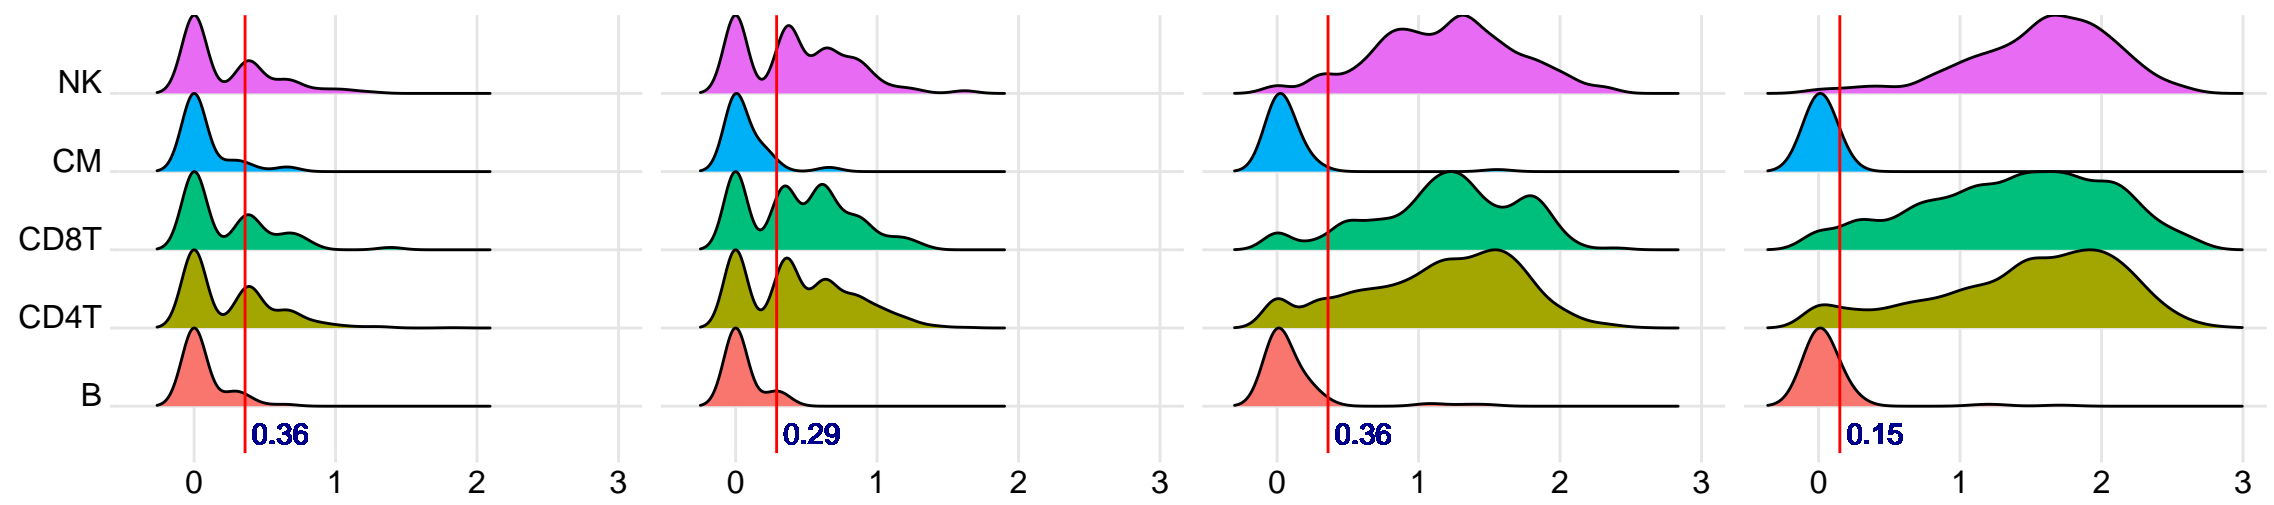**CD70**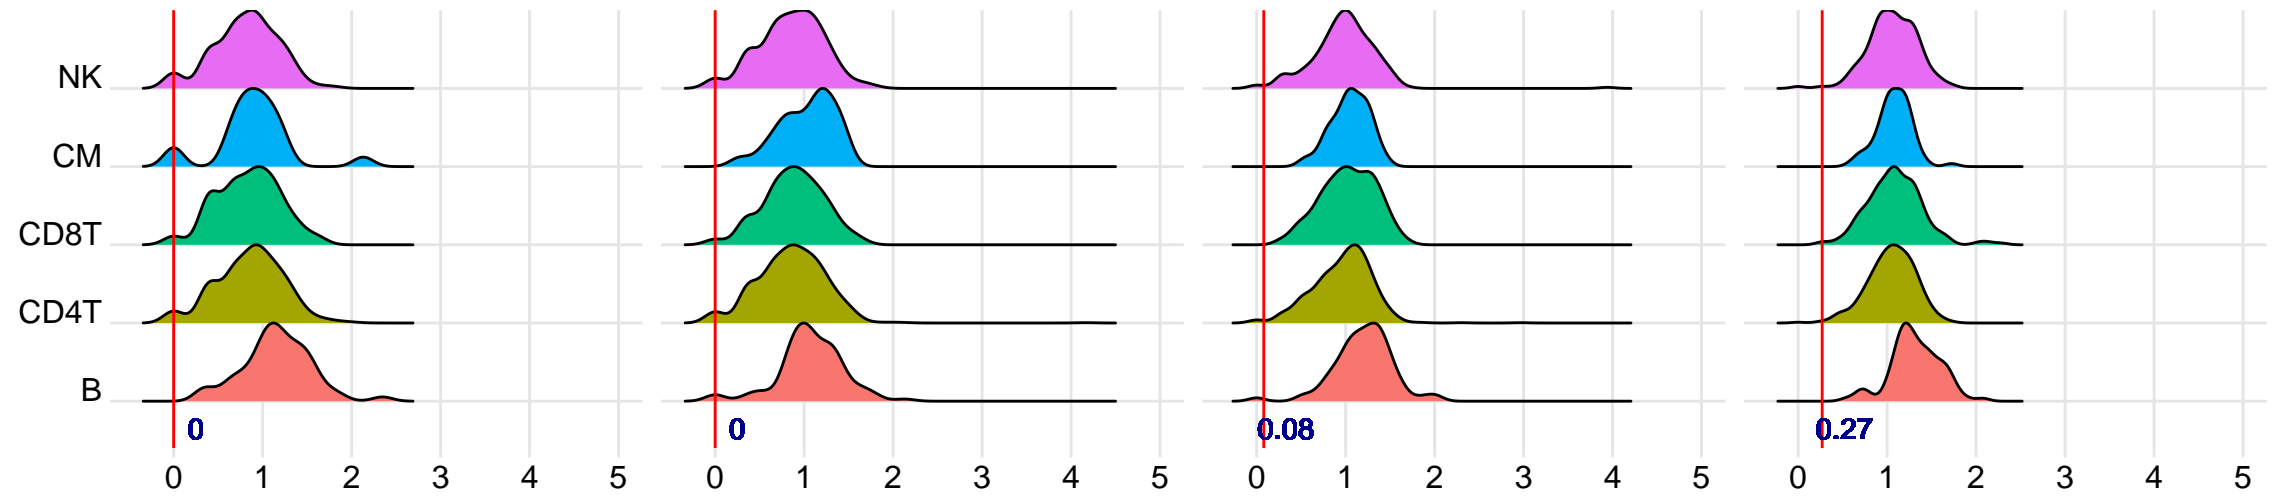**CD73**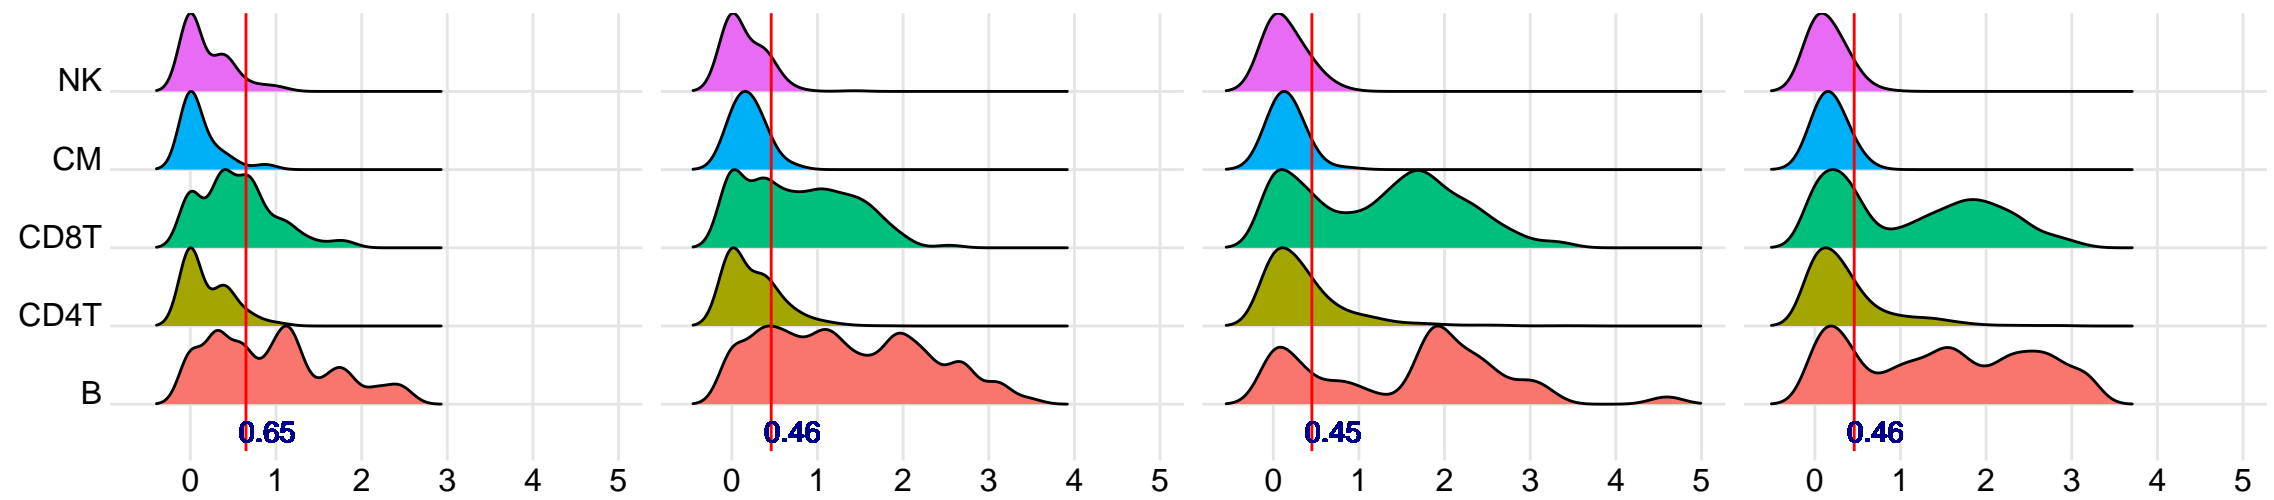**CD79b**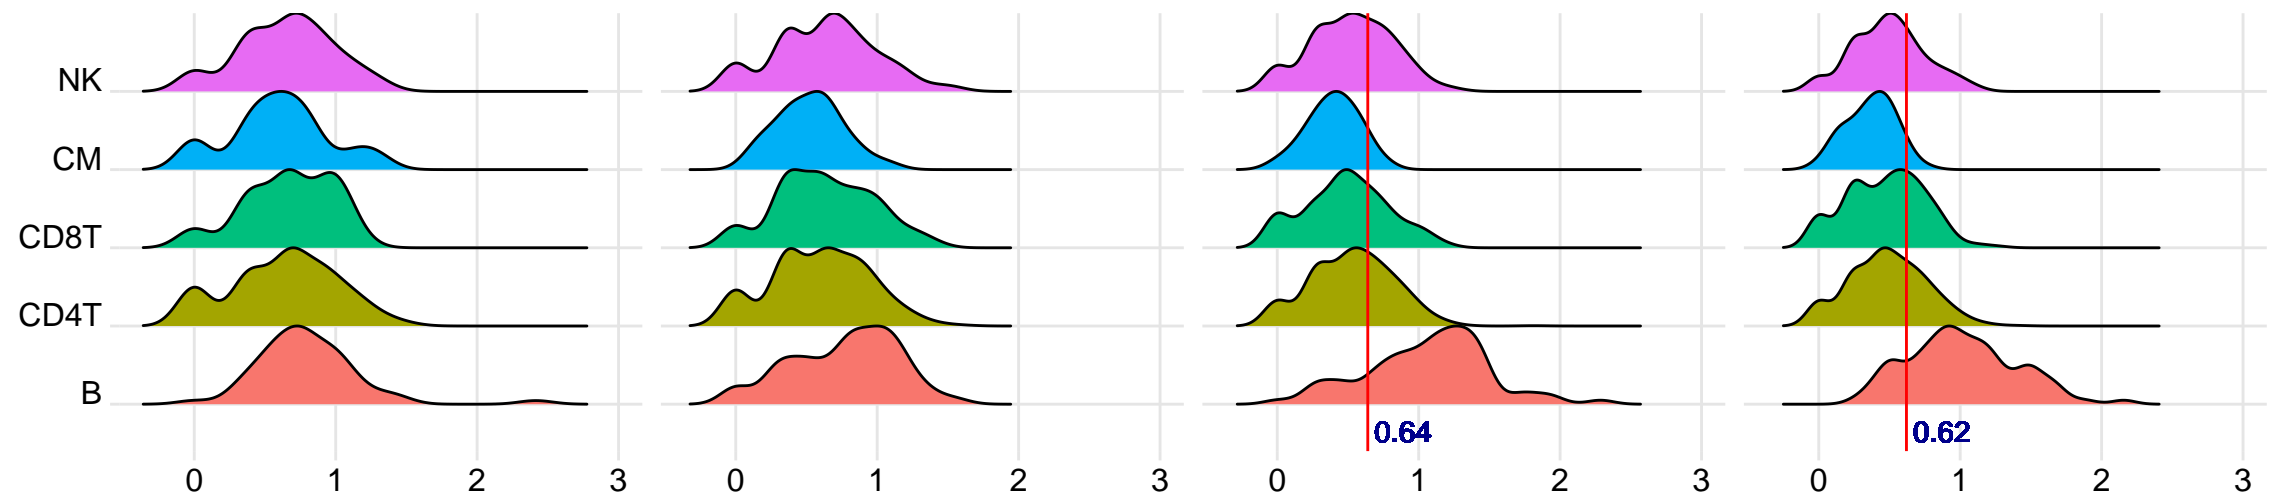**CD8**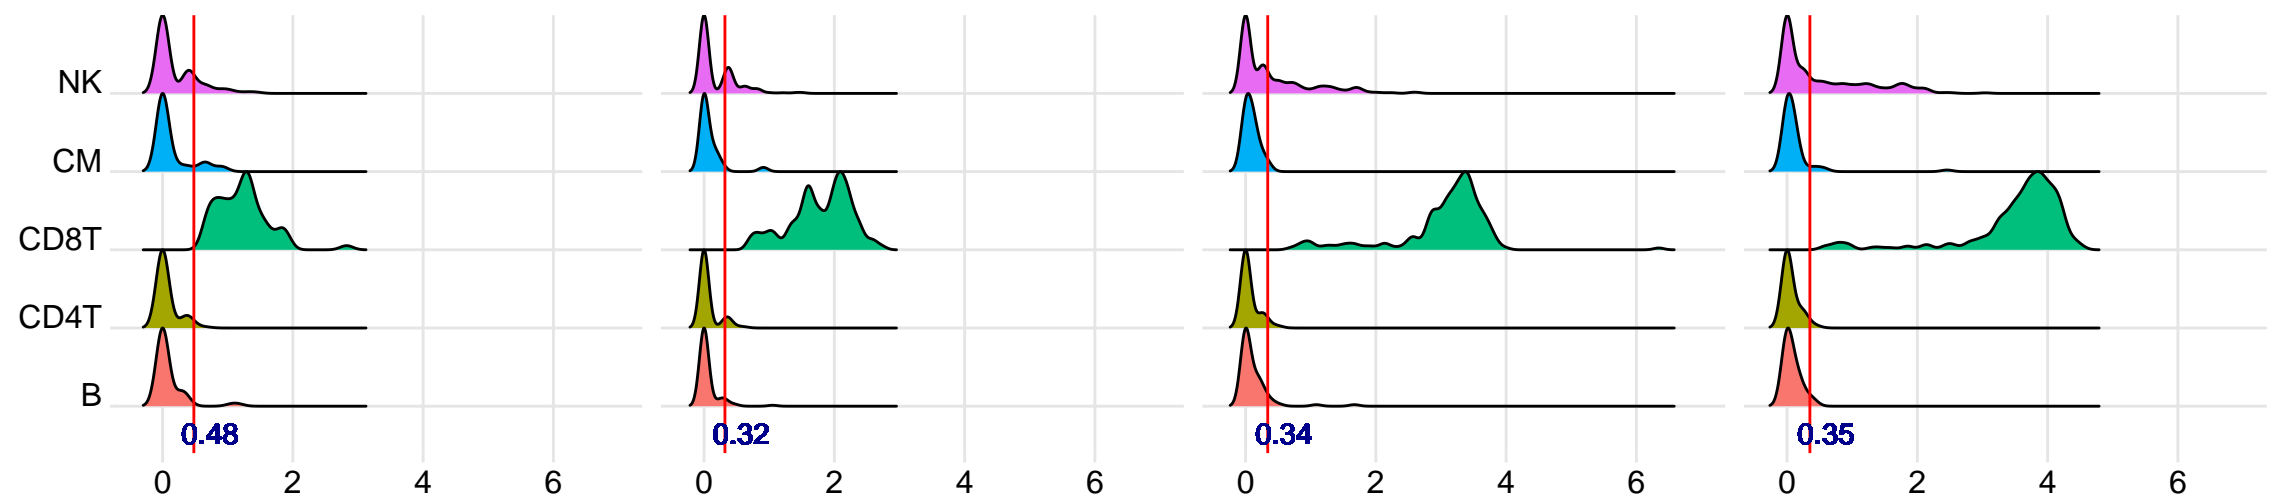

**CD81**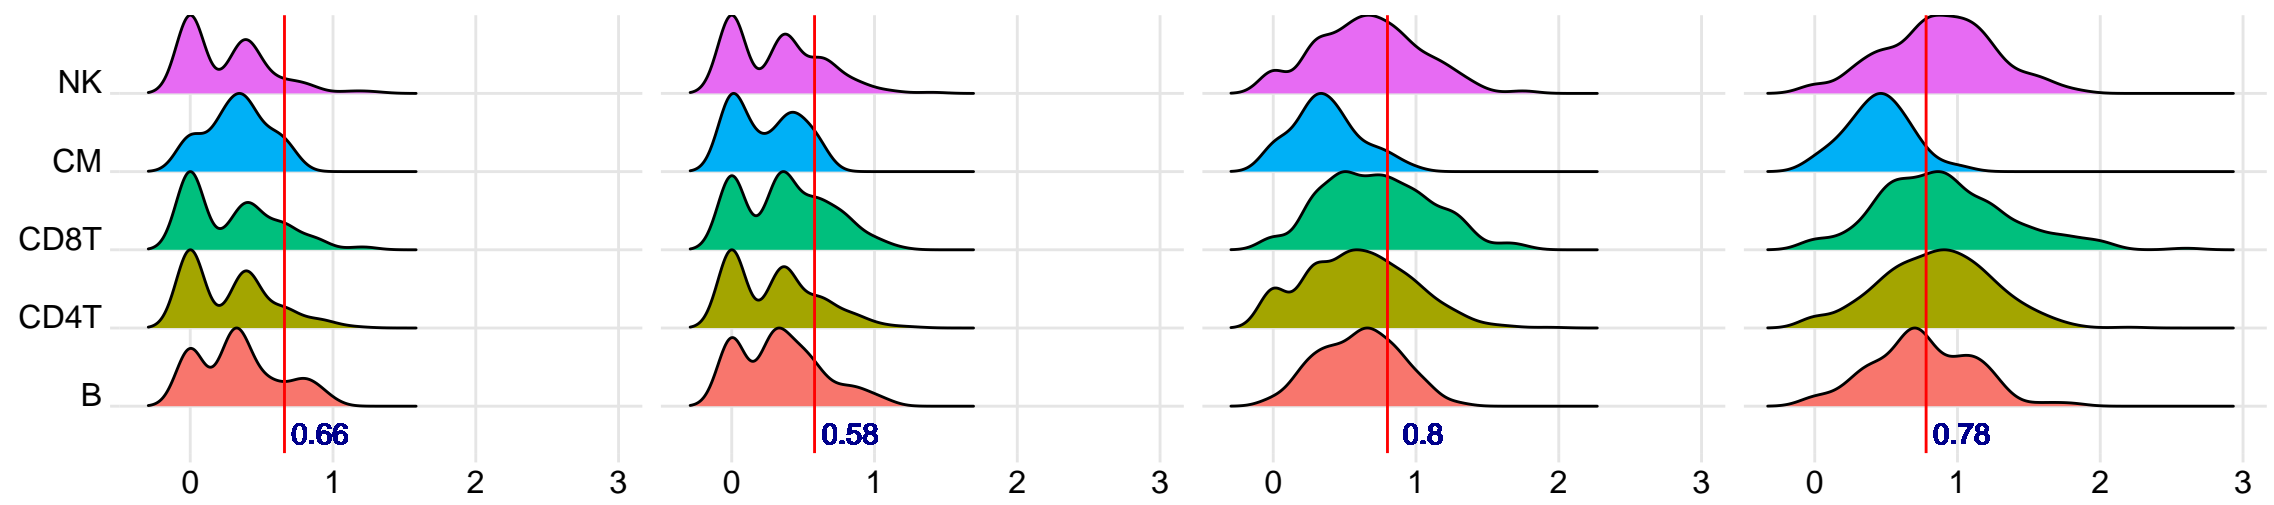**CD82**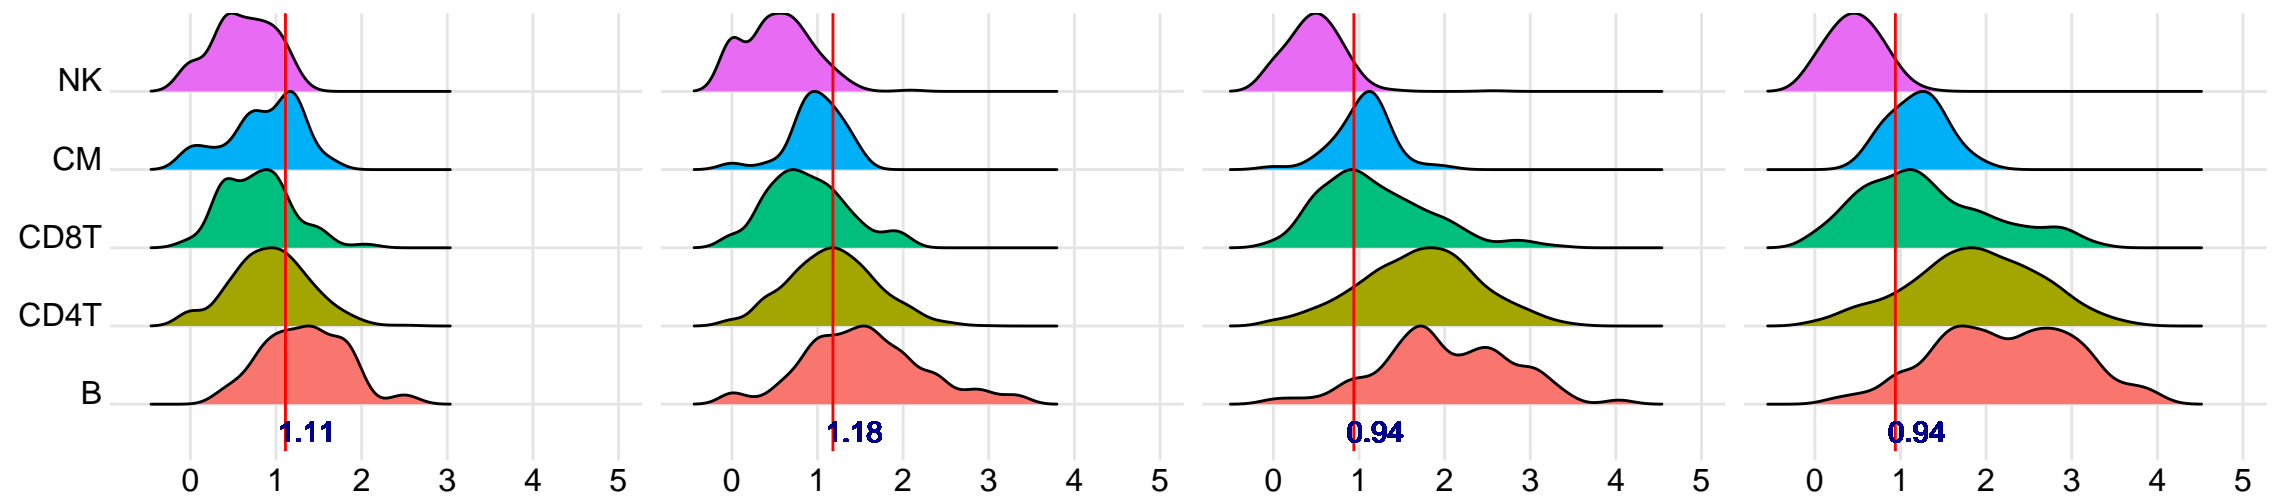**CD85j**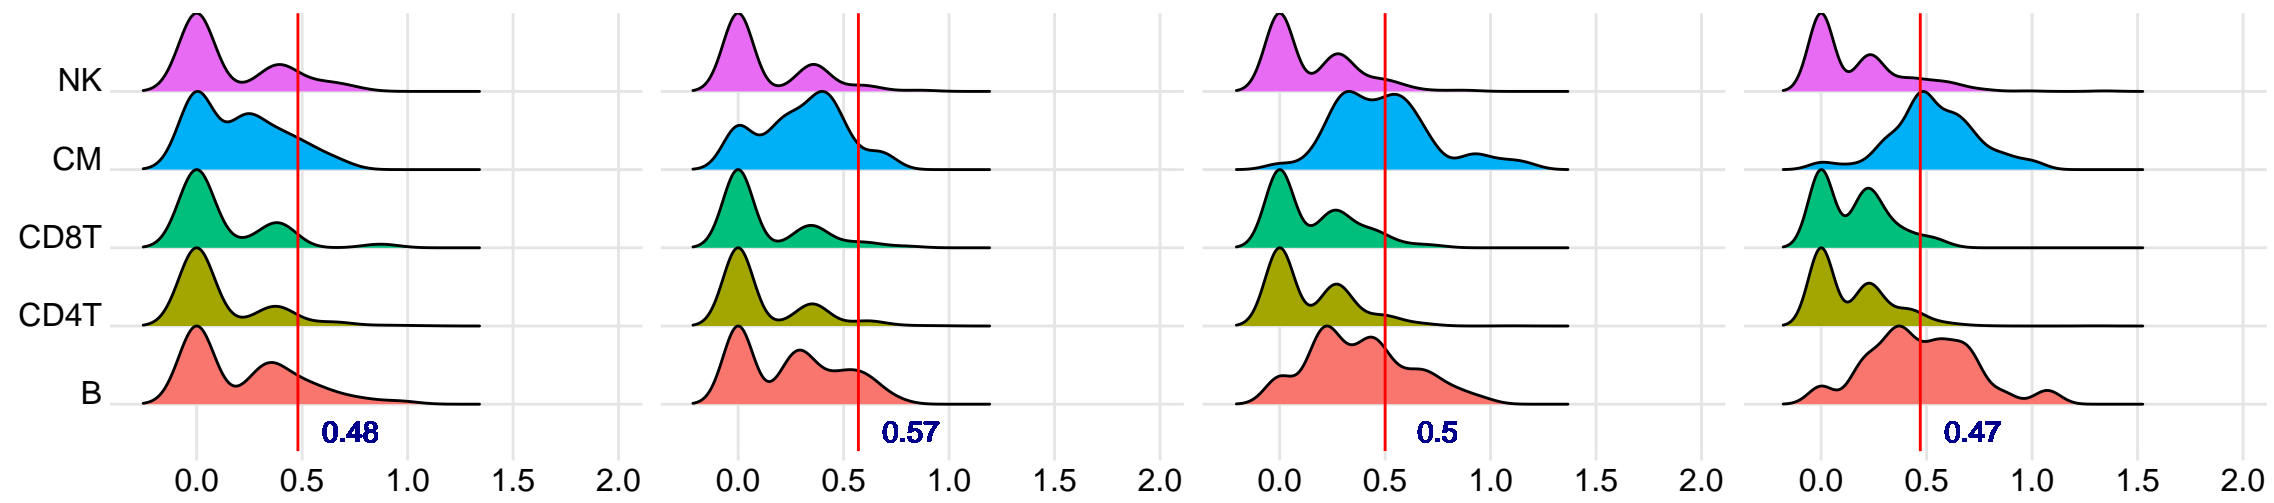**CD86**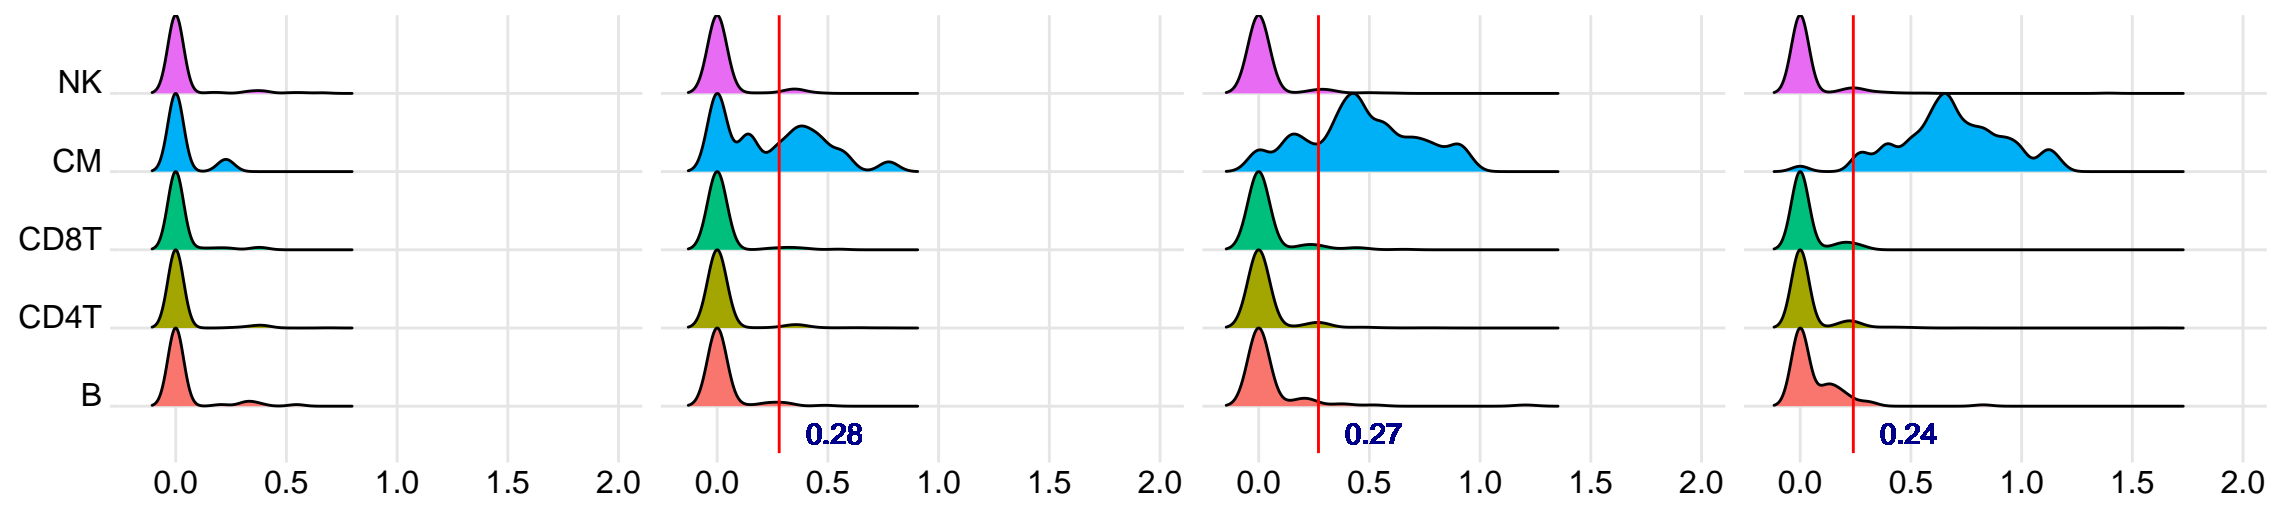**CD88**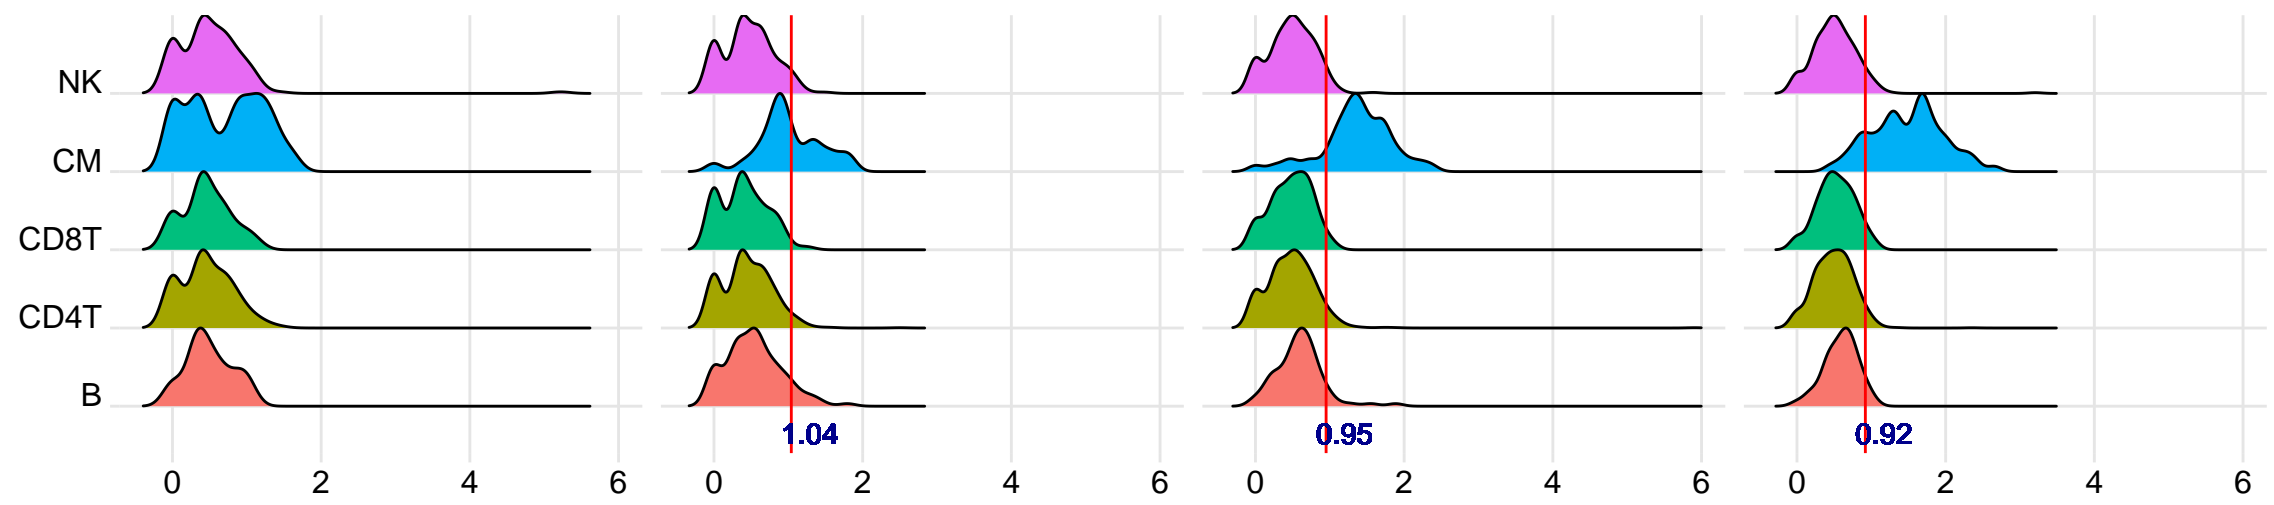

**CD94**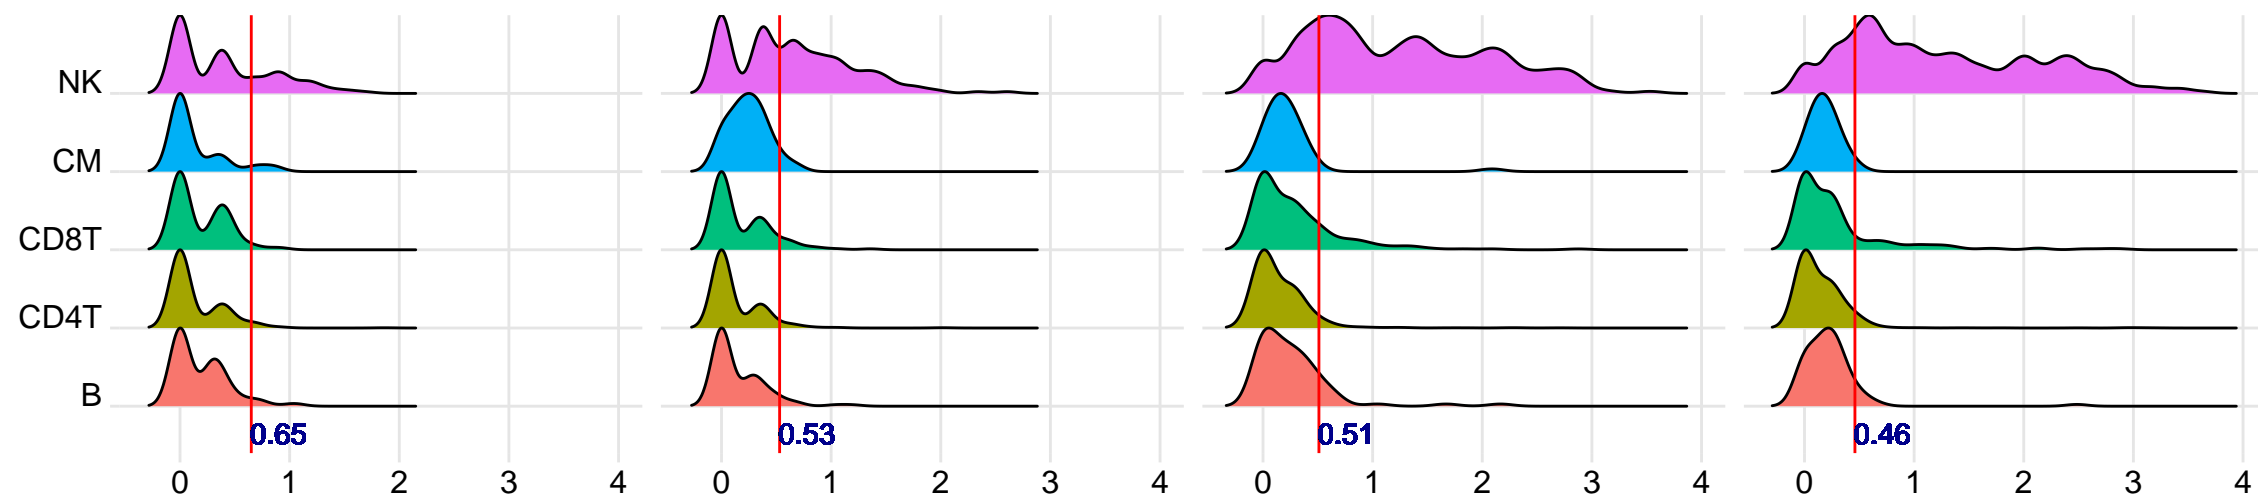**CD95**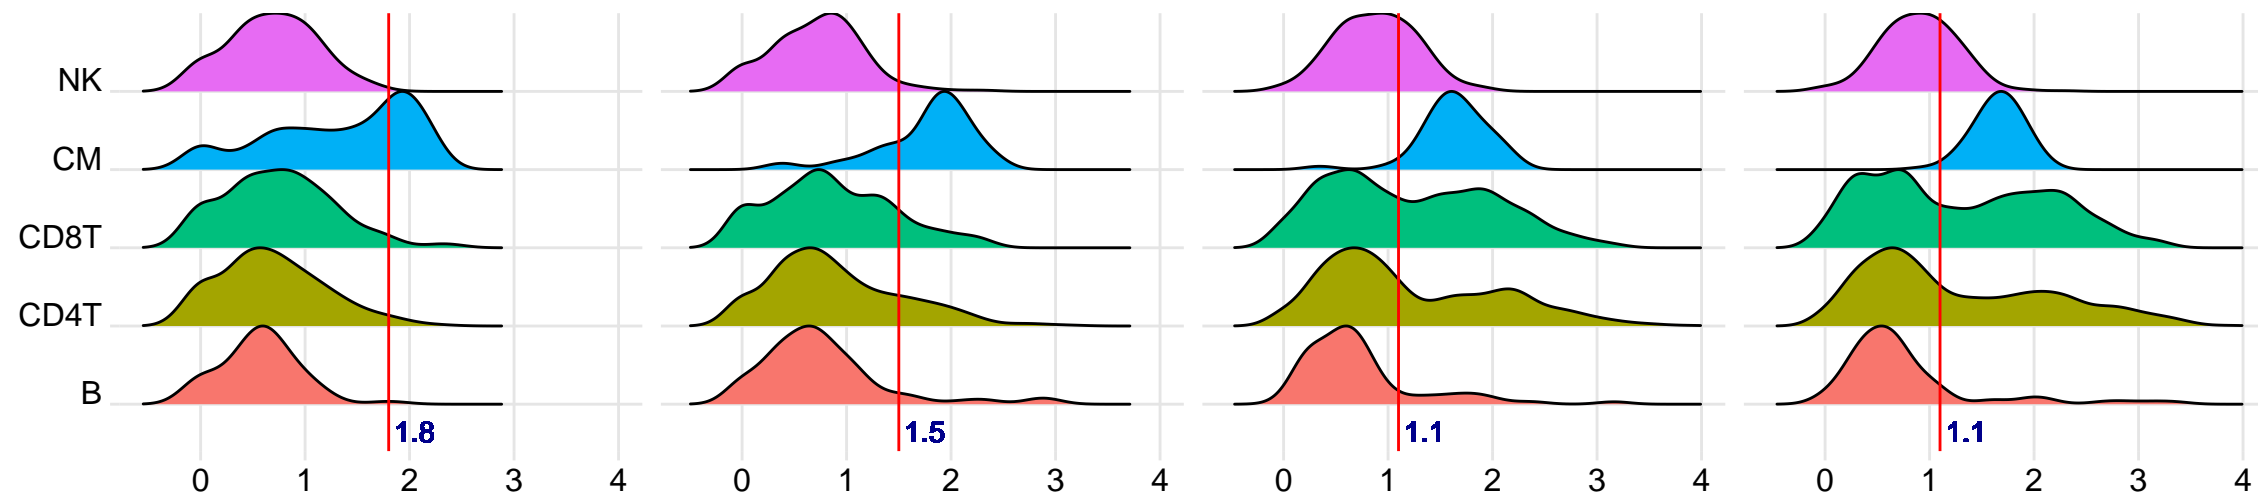**CD96**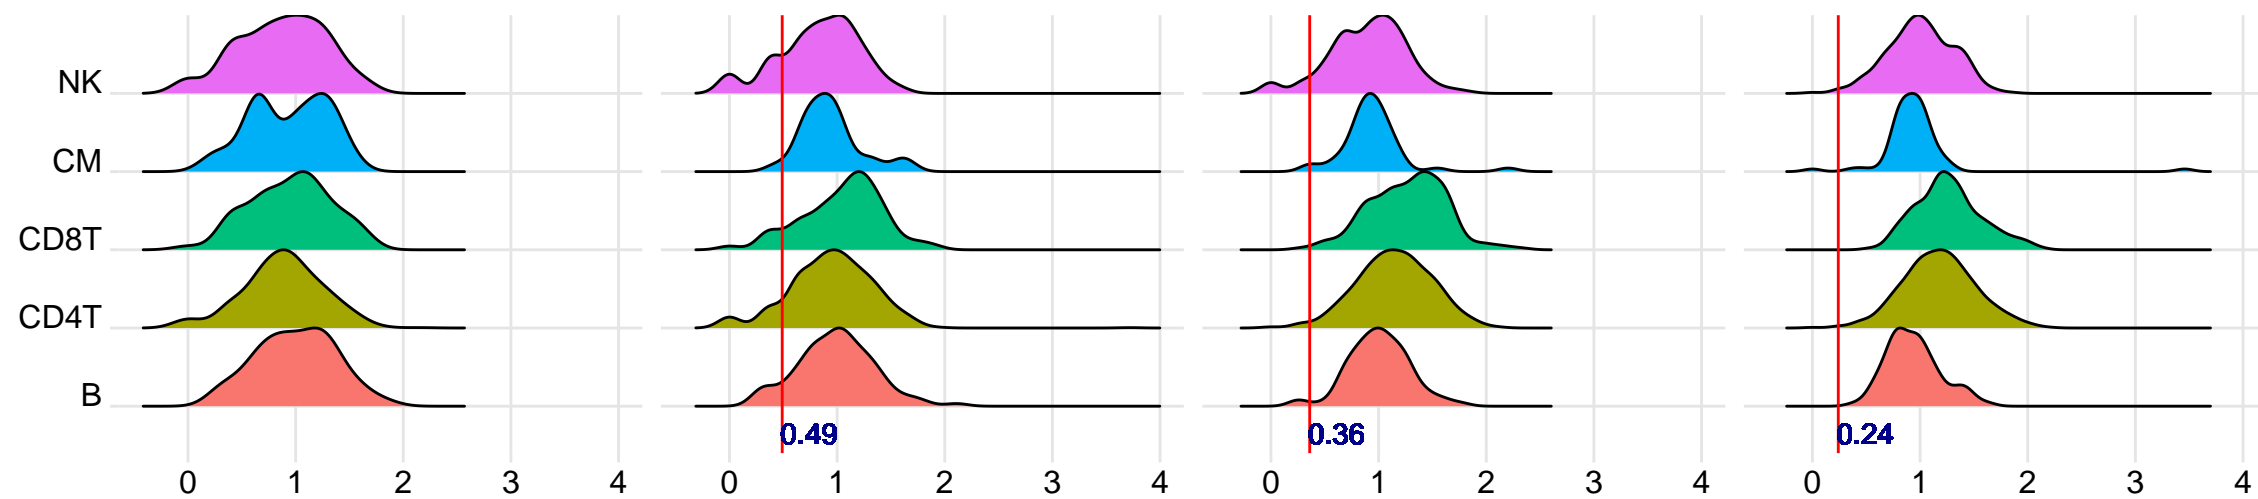**CD98**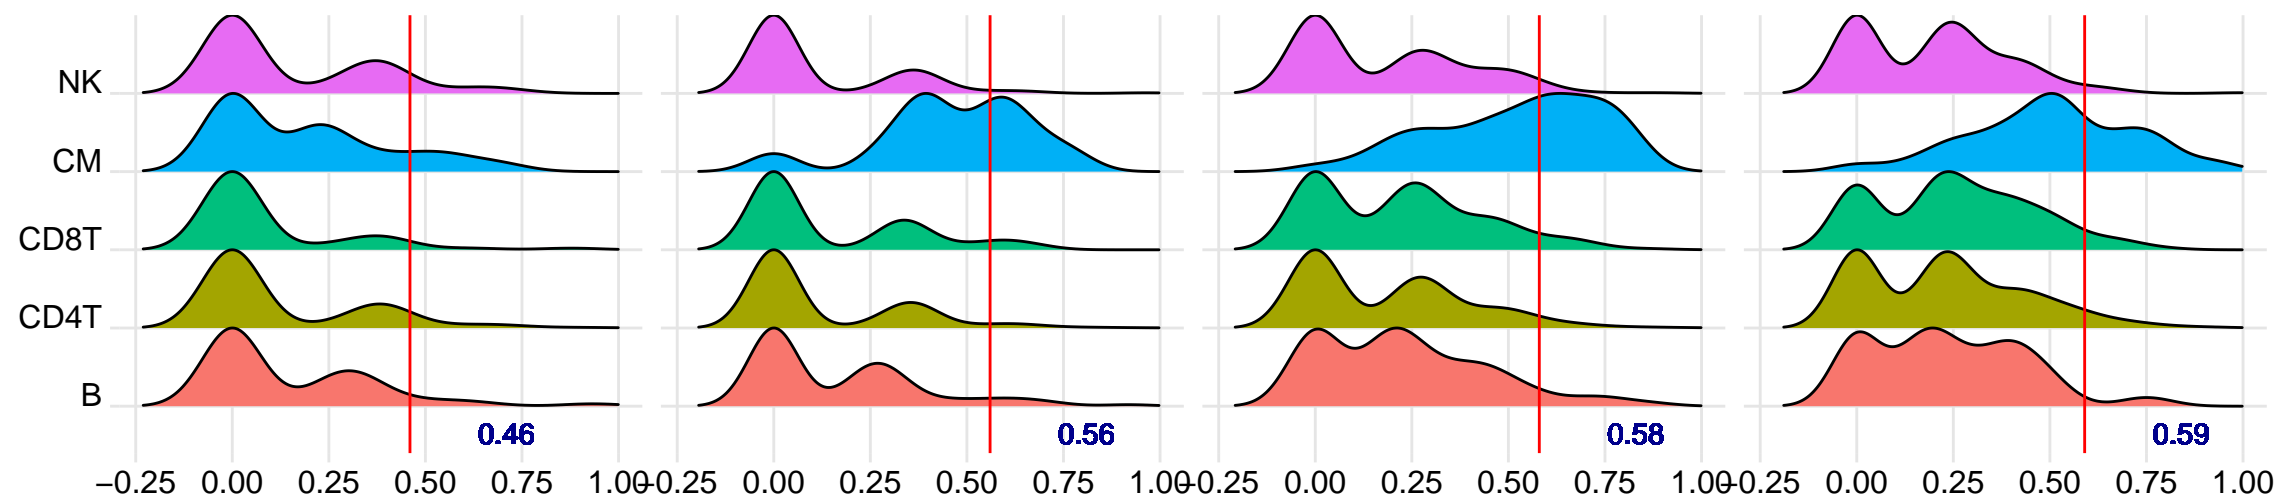**CD99**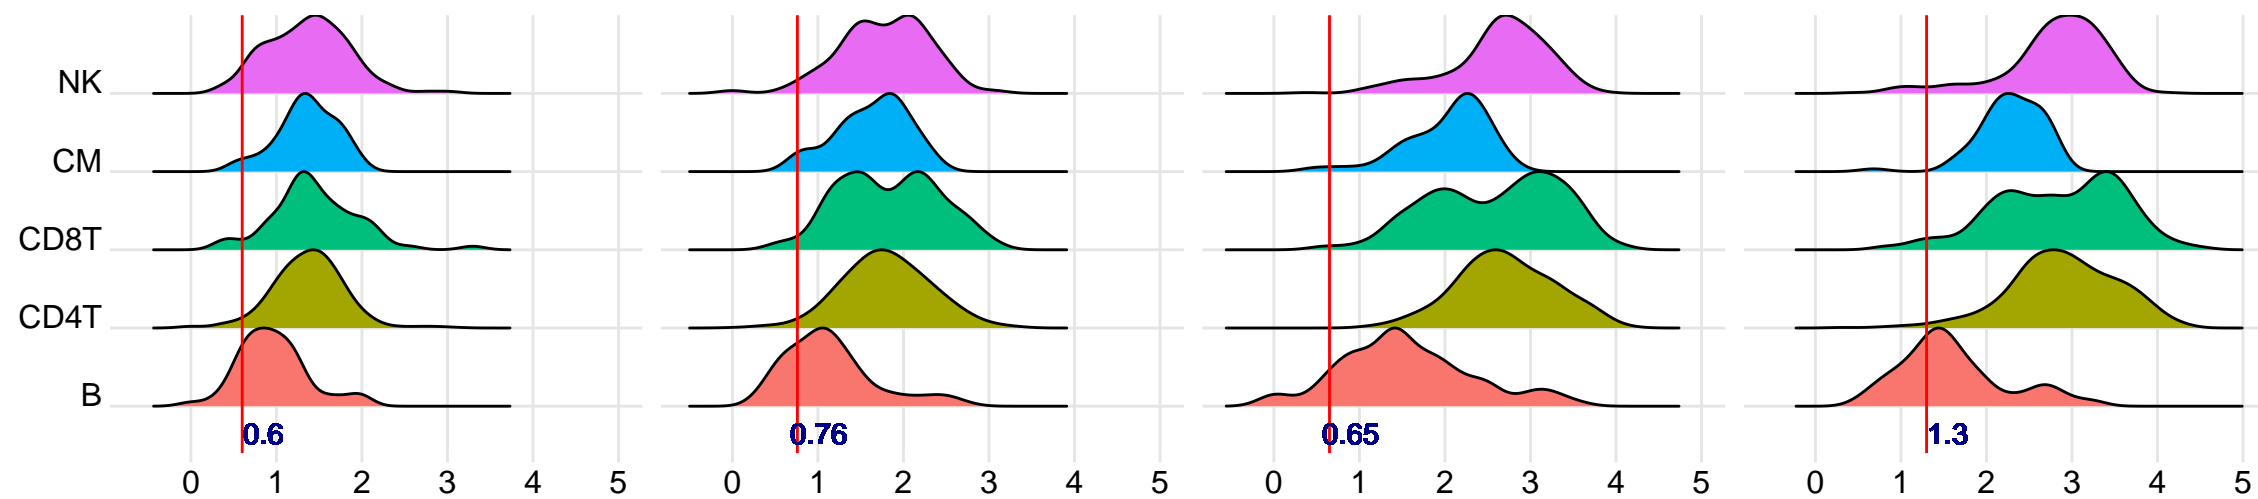

### CLEC12A

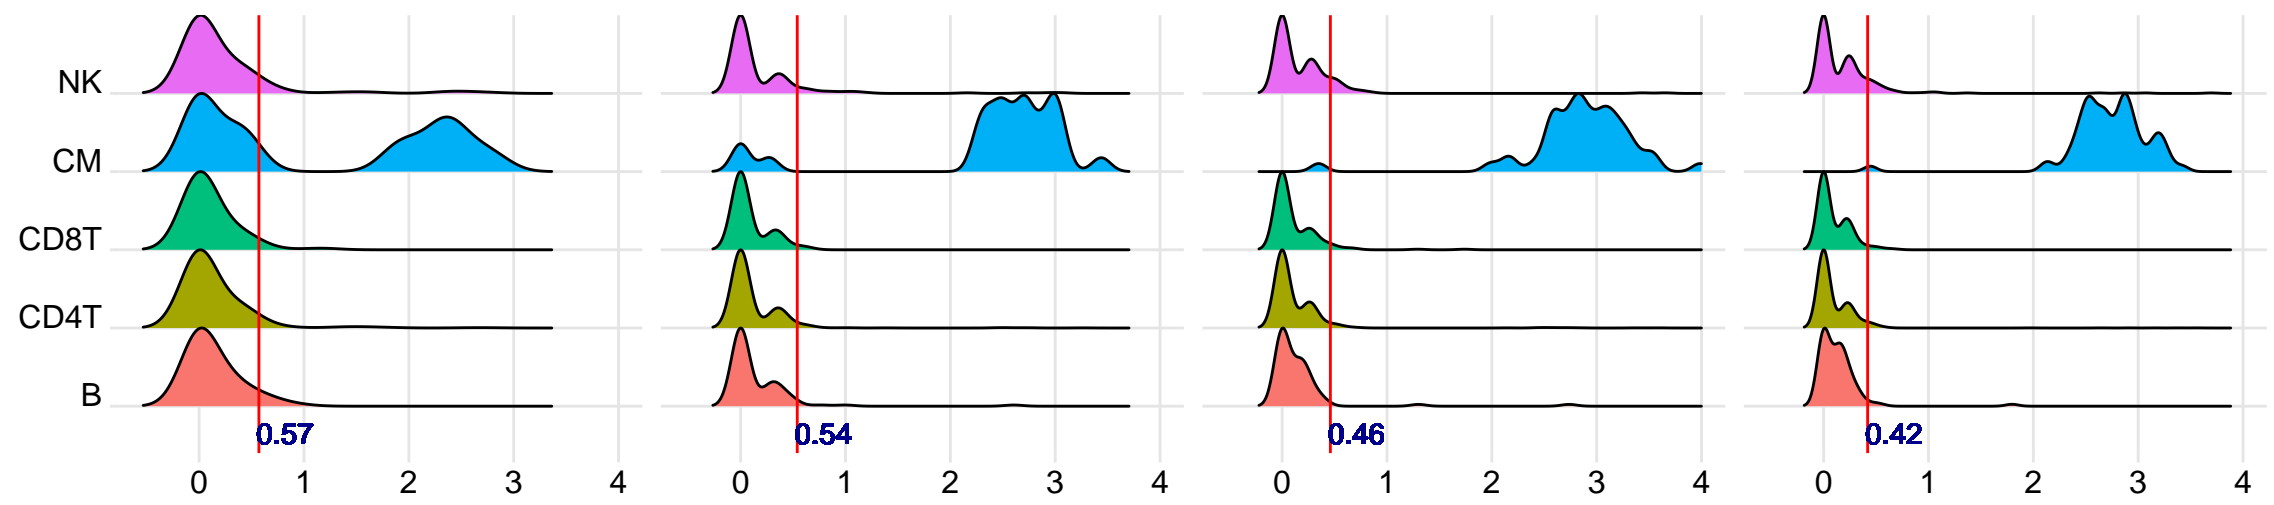

### CX3CR1

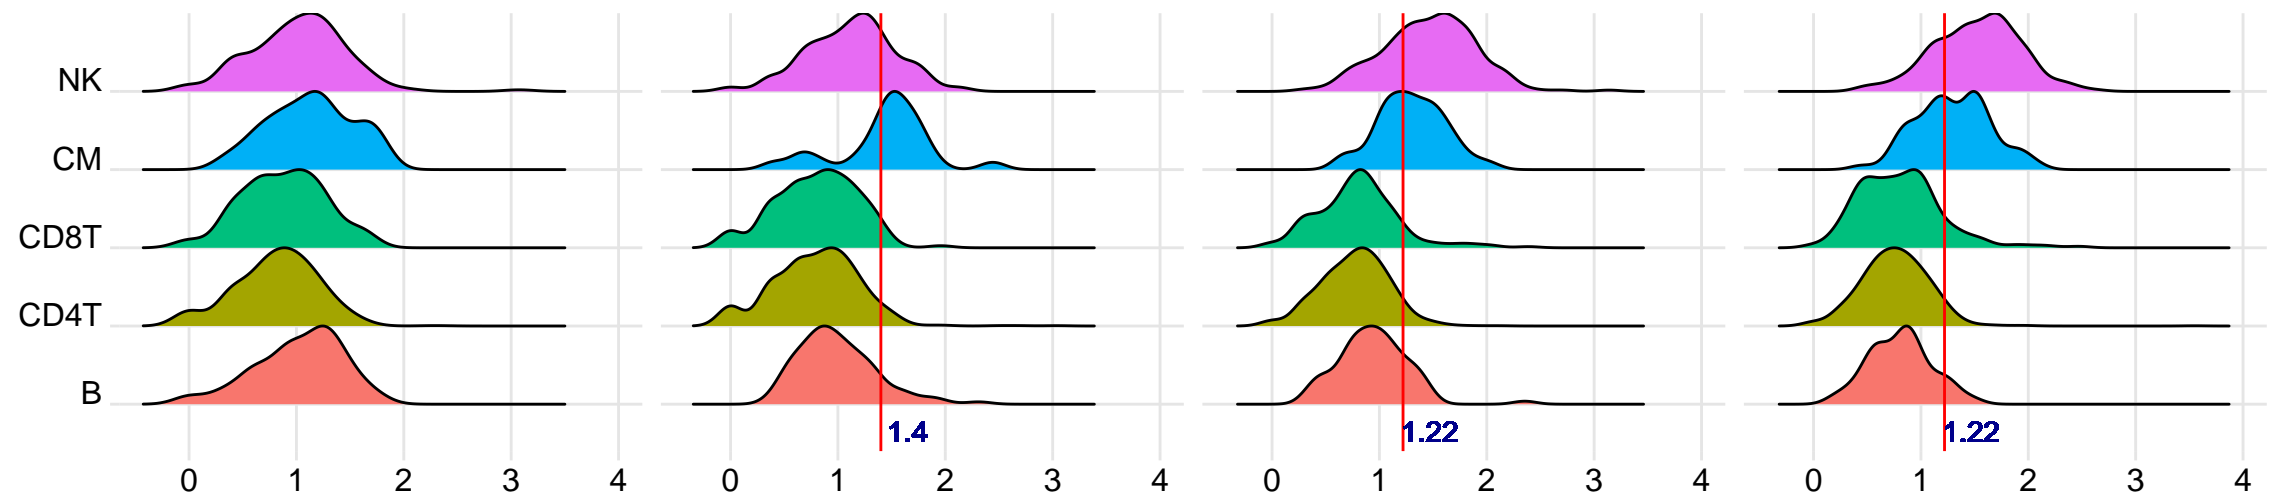

### GARP

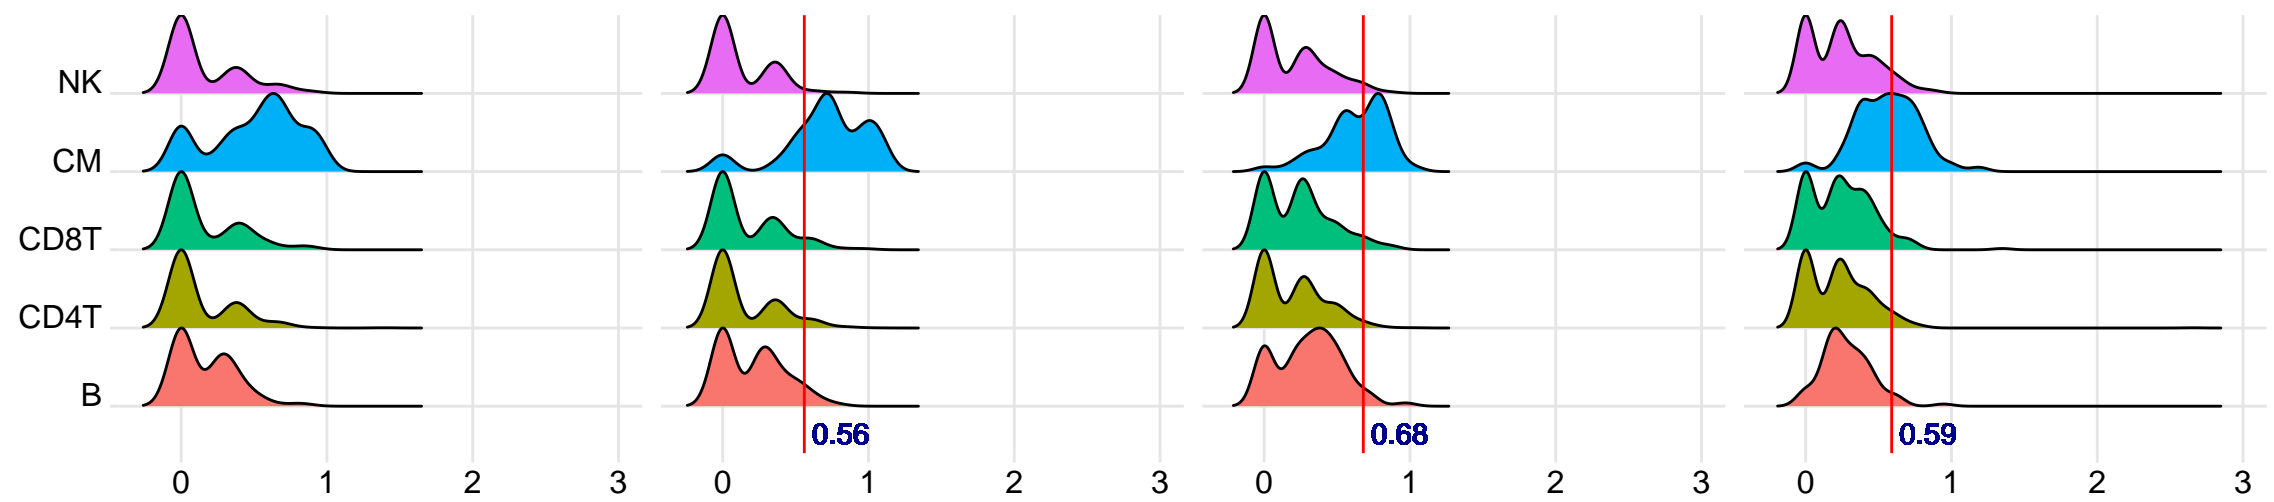

### HLA.DR

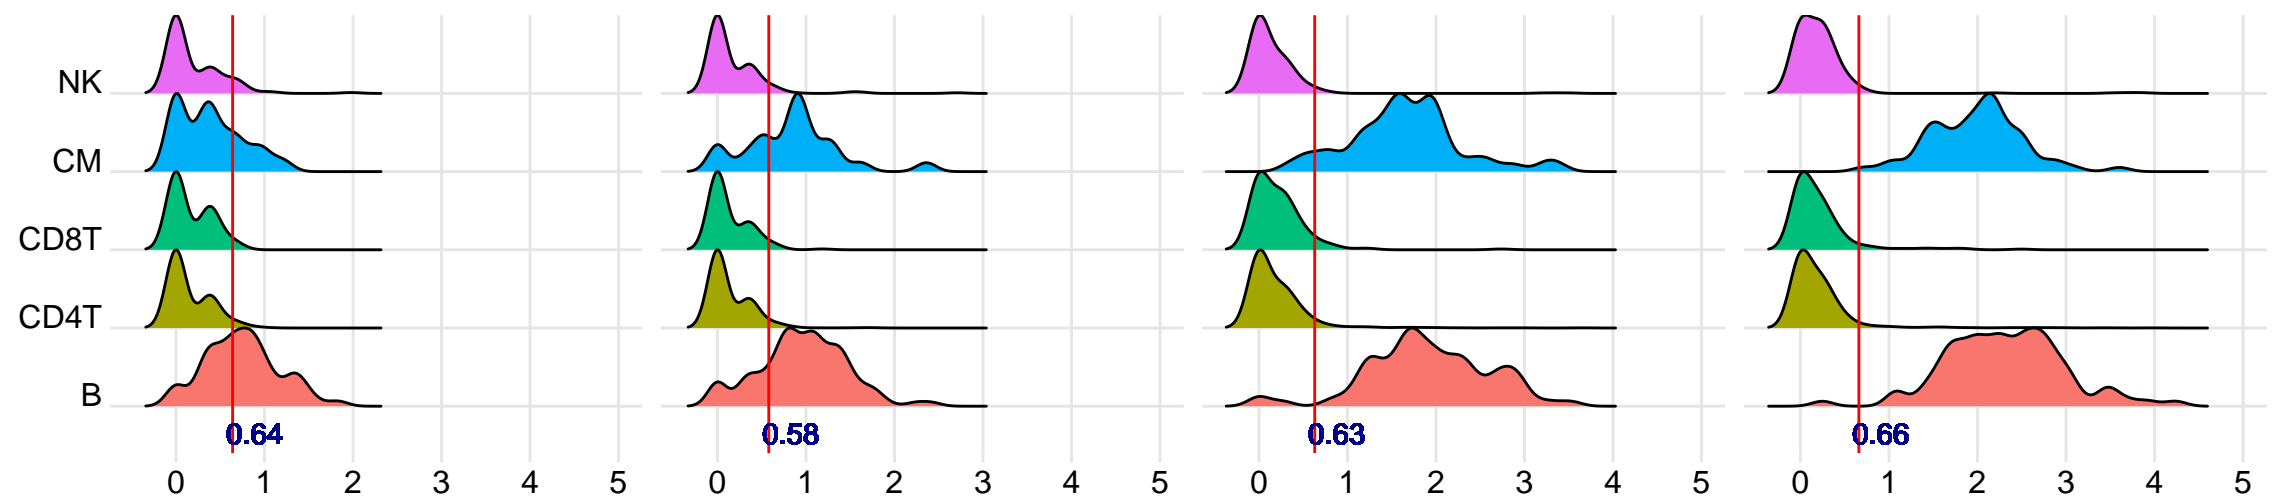

### Ig.light.chain.kappa

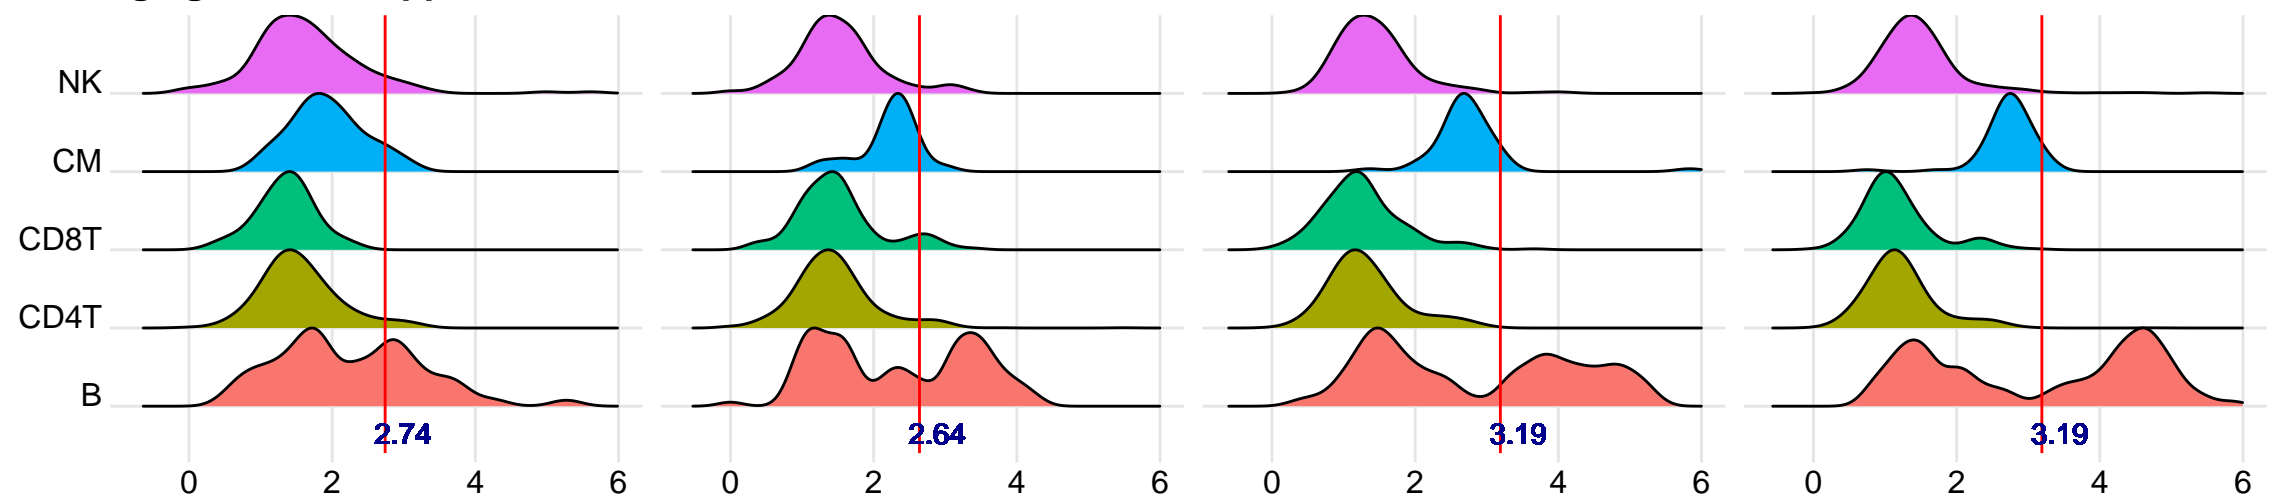

### Ig.light.chain.lambda

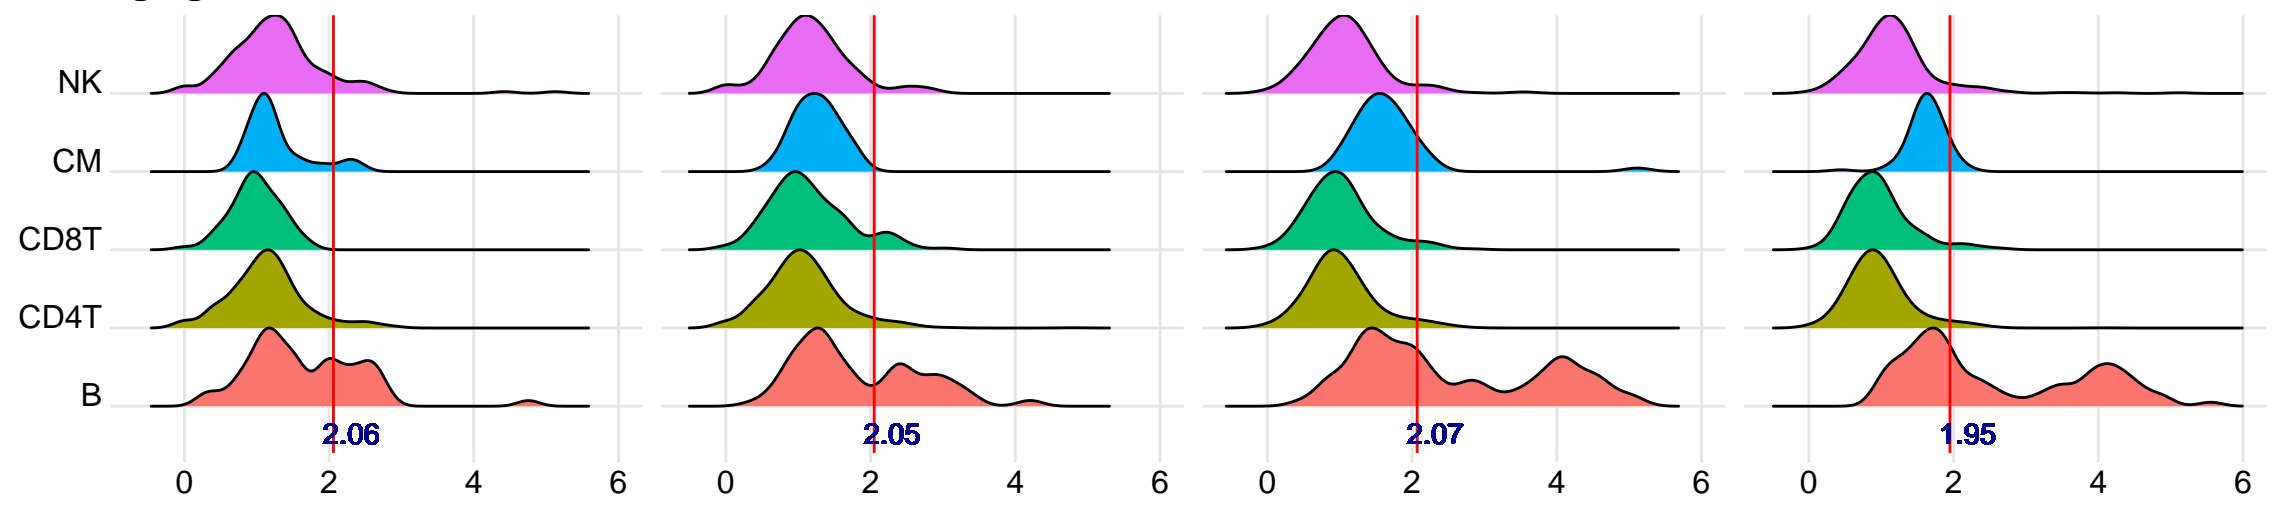

### IgA

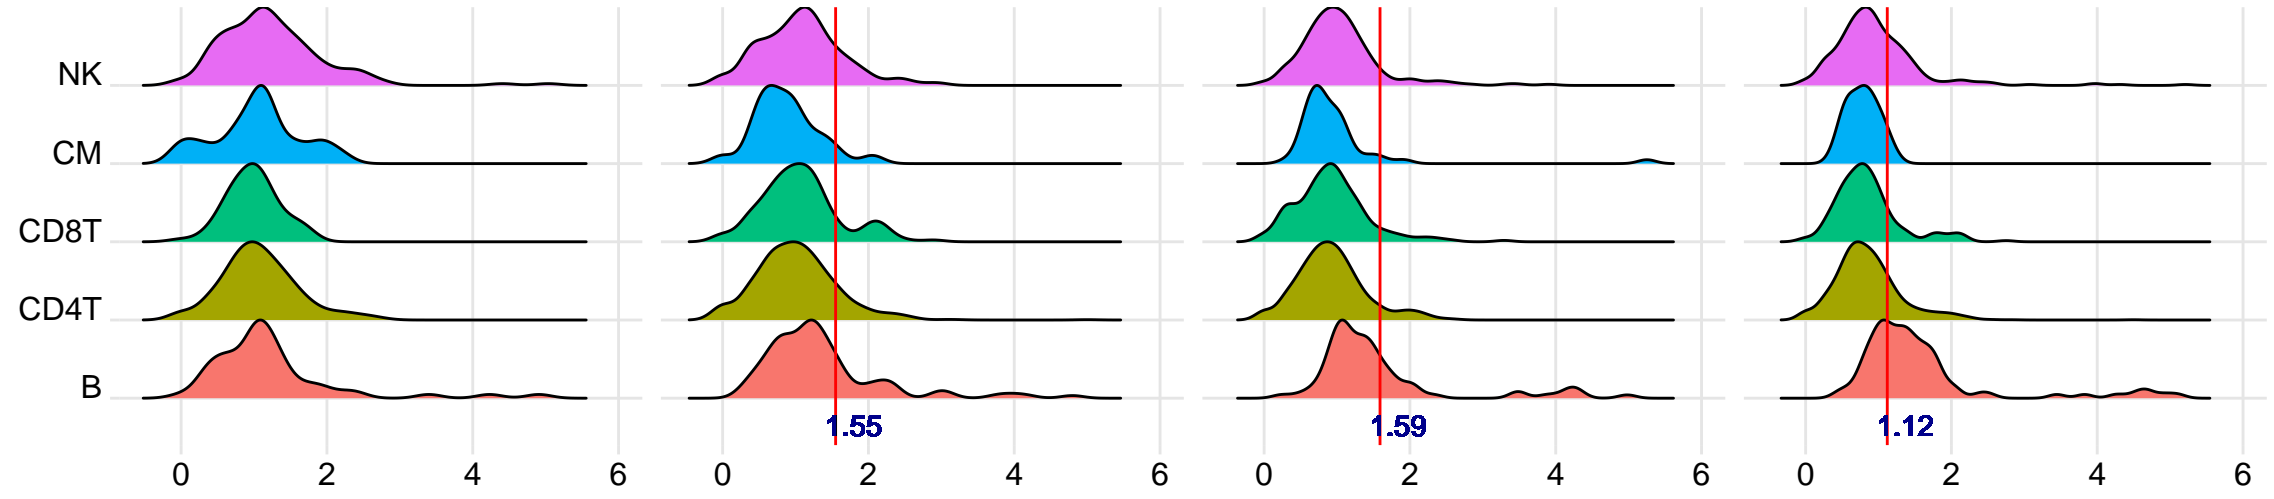

### IgD

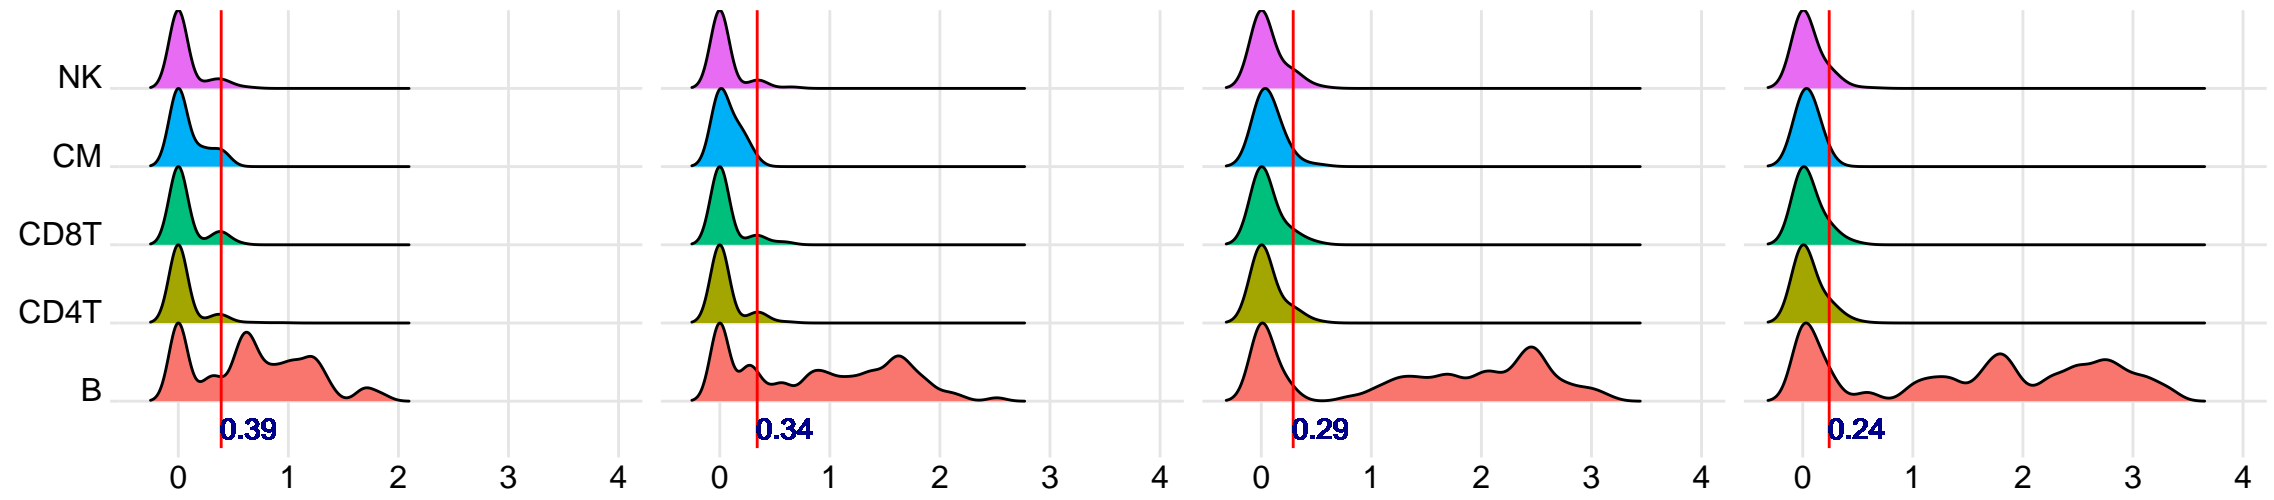

### IgG.Fc

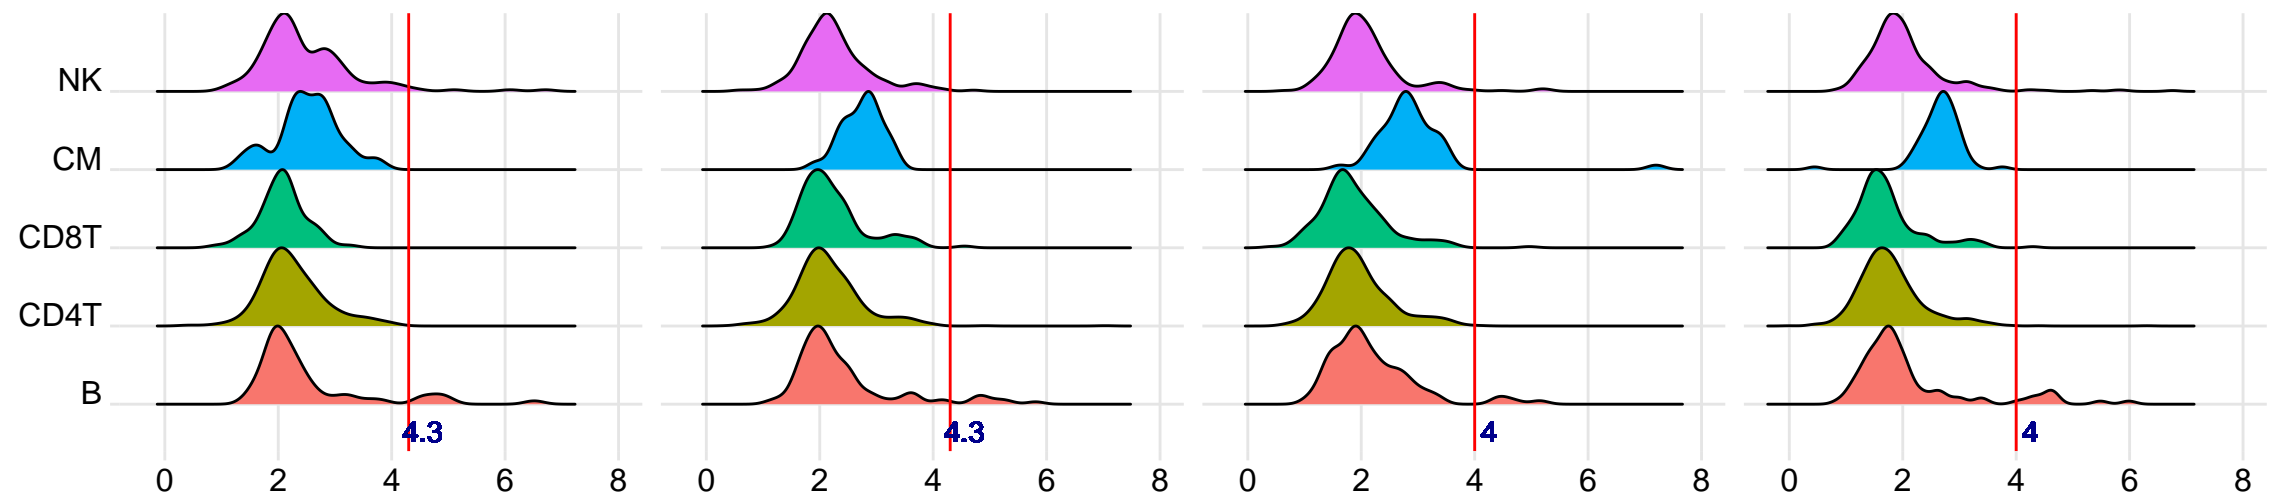

### IgM

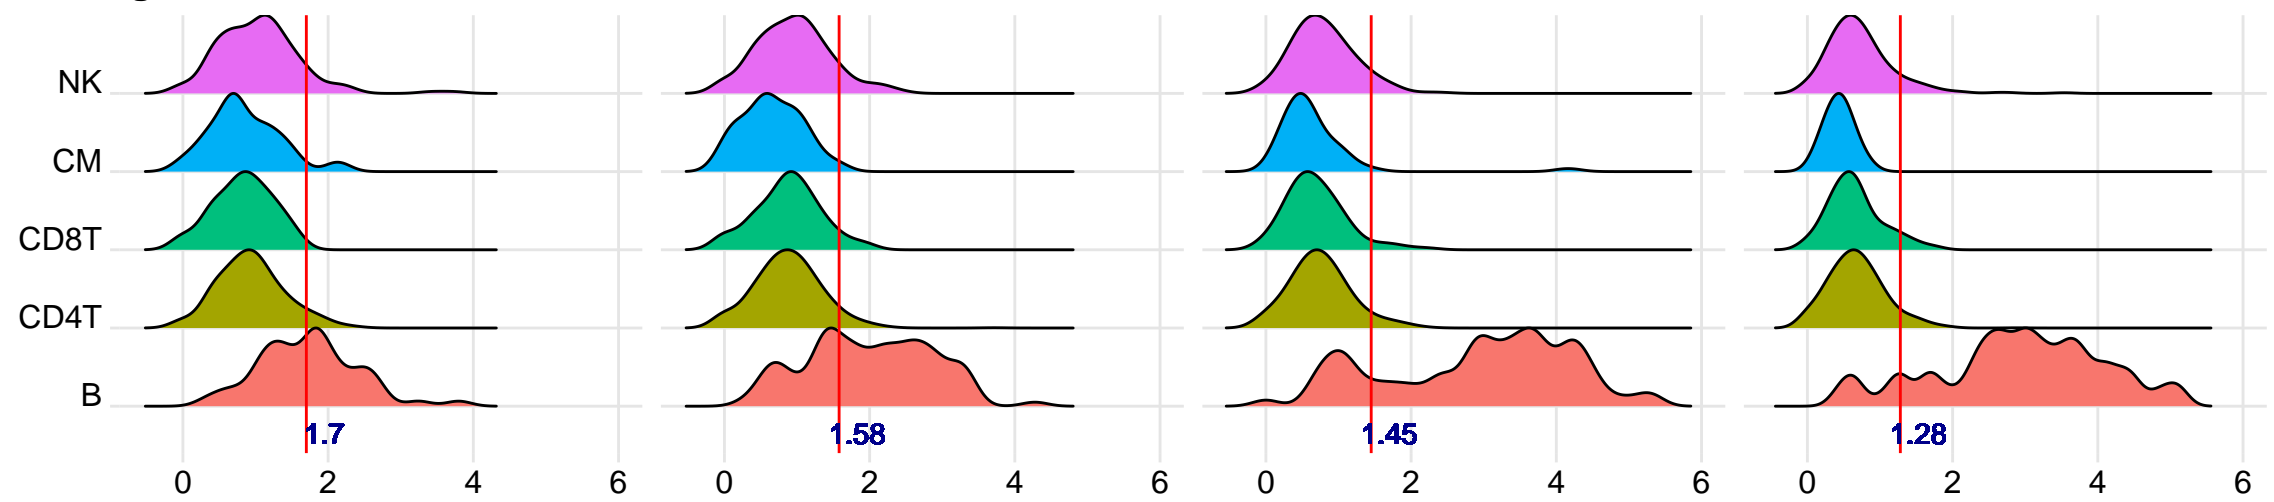

### integrin.B7

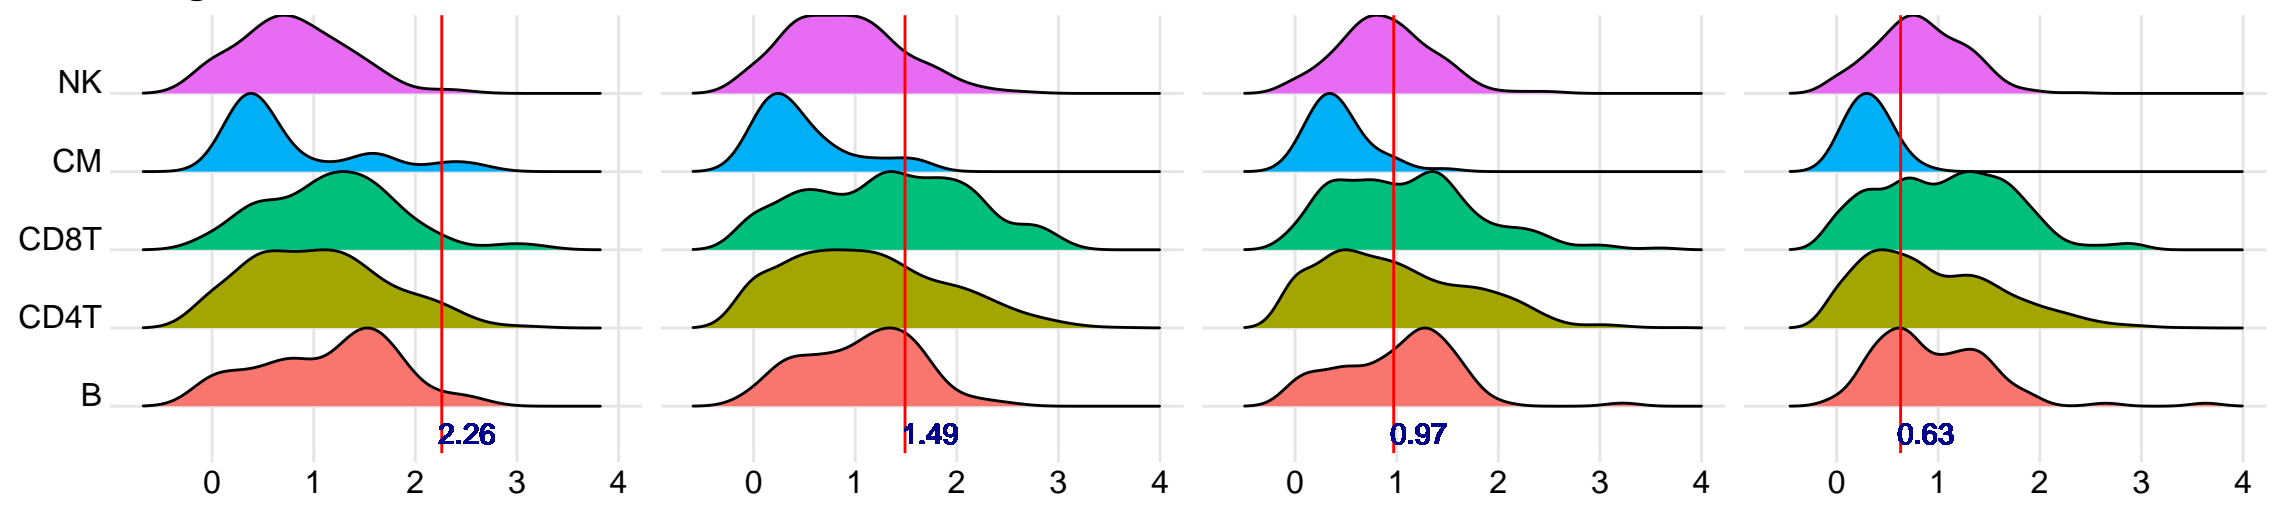

### KLRG1

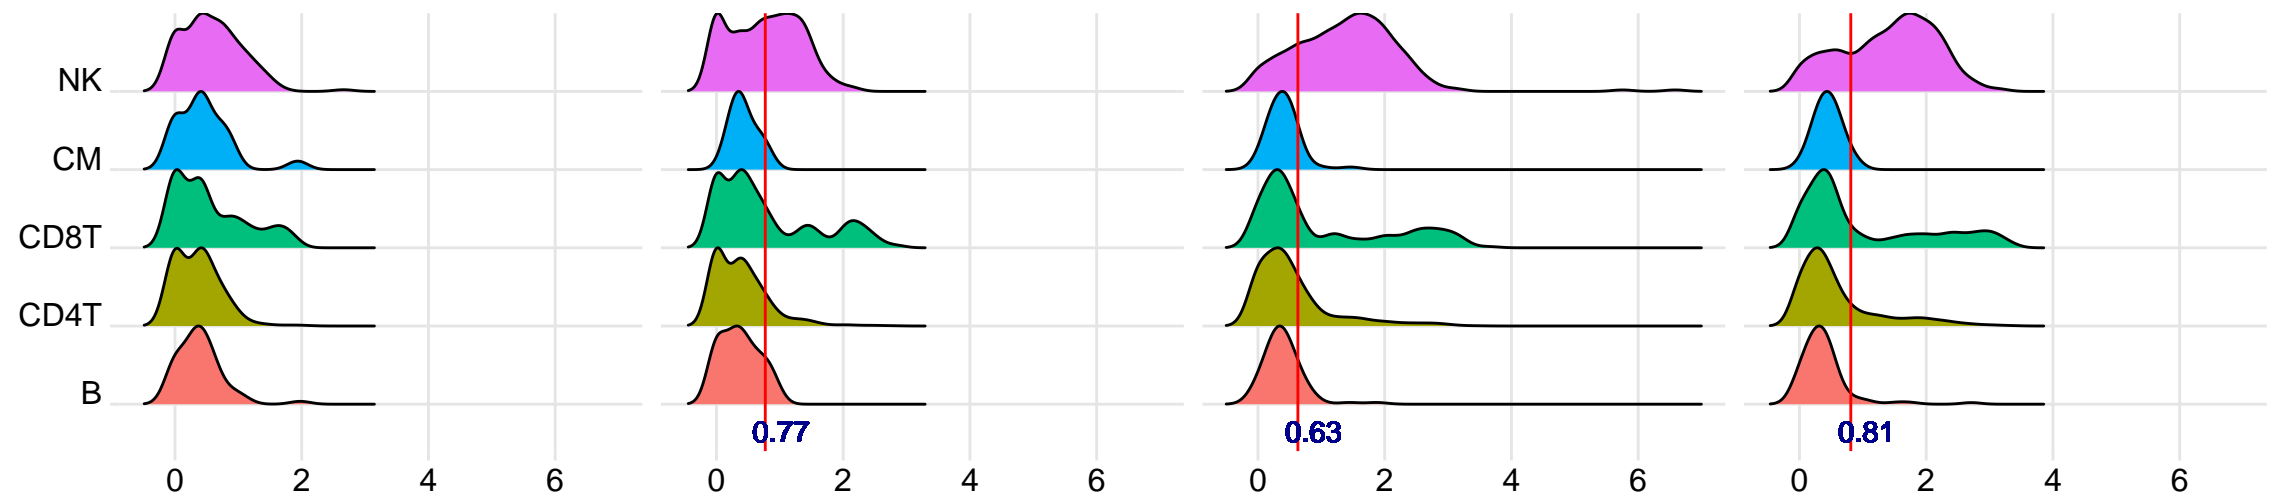

### TCRab

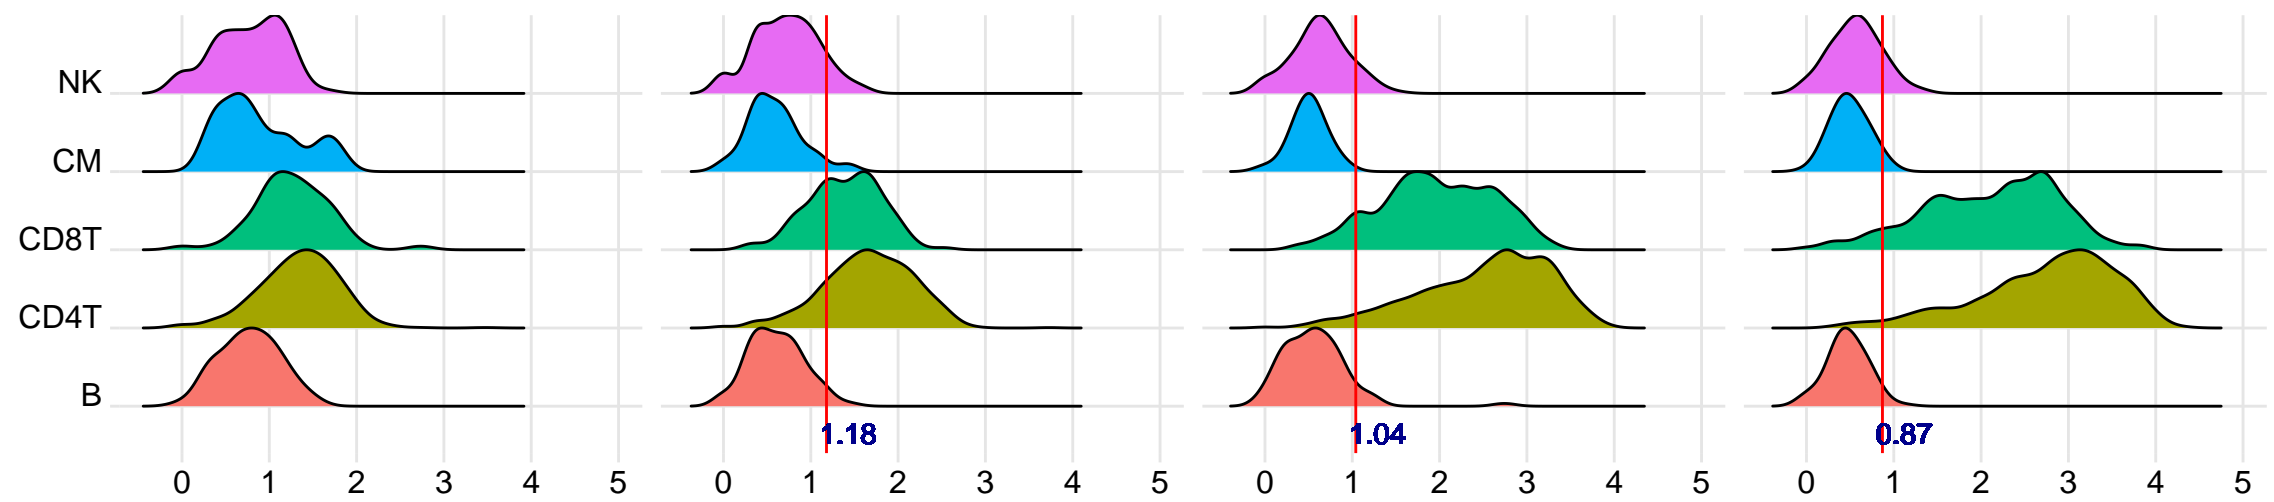

### TIGIT

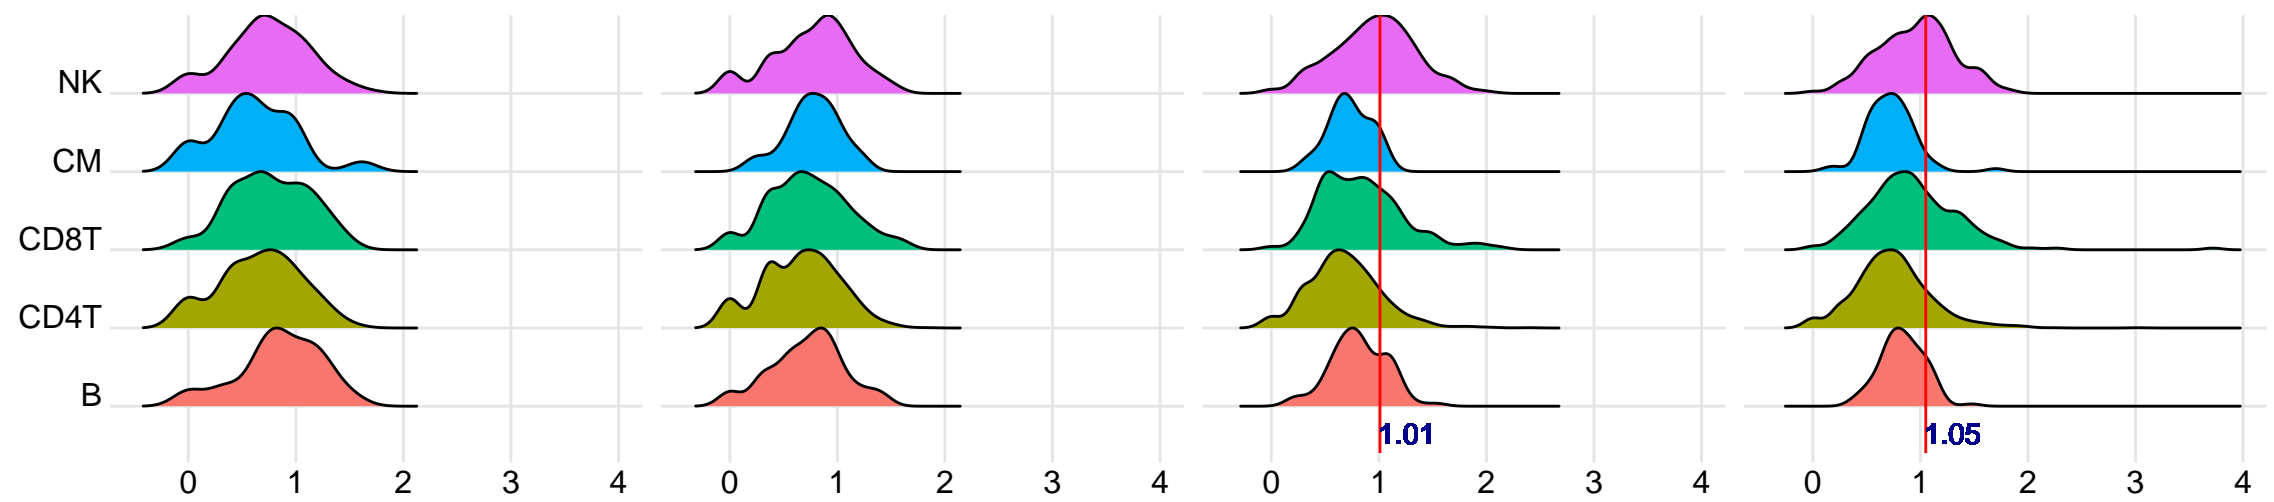

Supplement: 41598_2022_24371_MOESM2_ESM.pdf [file 41598_2022_24371_MOESM2_ESM.pdf]
