# Supplementary material for: Titration of 124 antibodies using CITE-Seq on human PBMCs
Source: PubMed Central journal article supplement (PMC9718773; doi:10.1038/s41598-022-24371-7), 2022-12-02

**XCR1**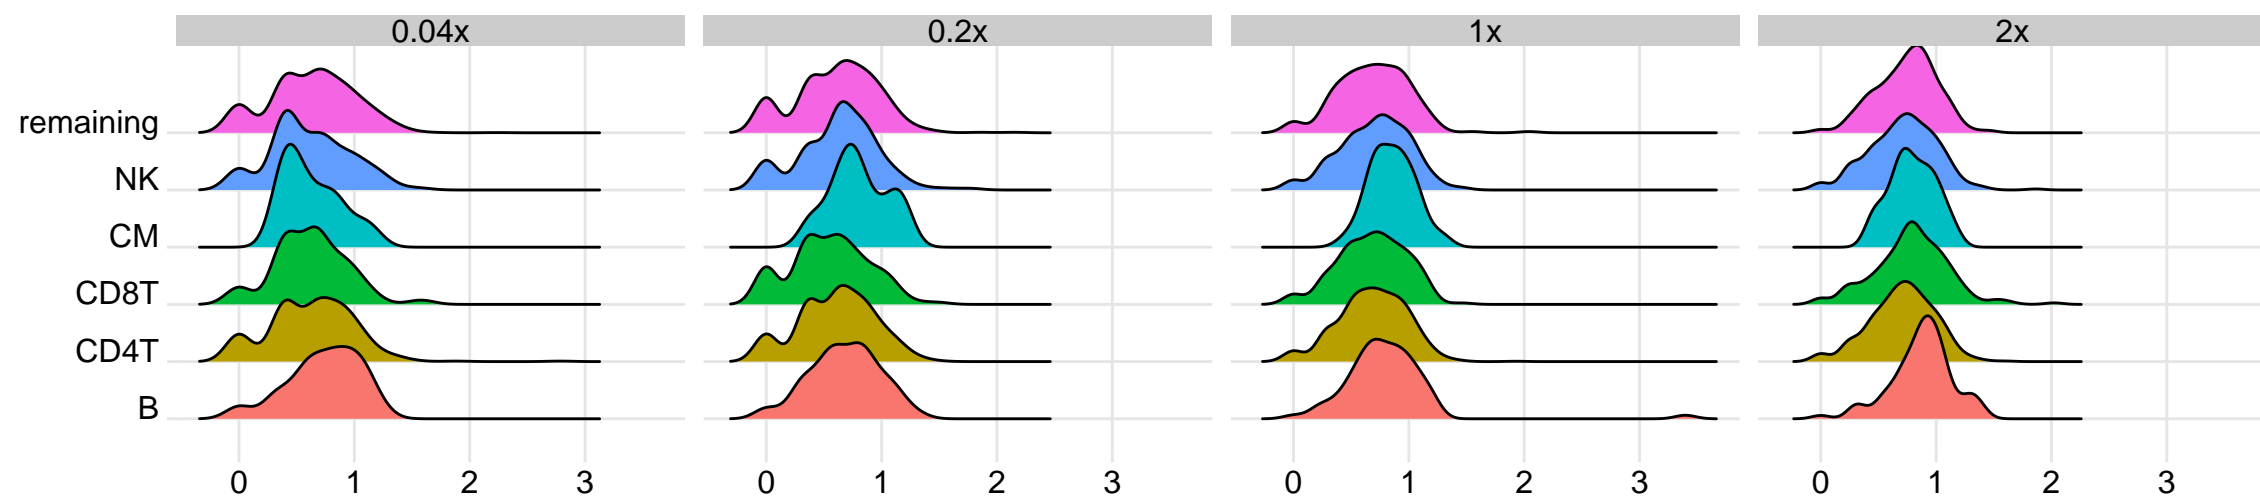**B7.H4**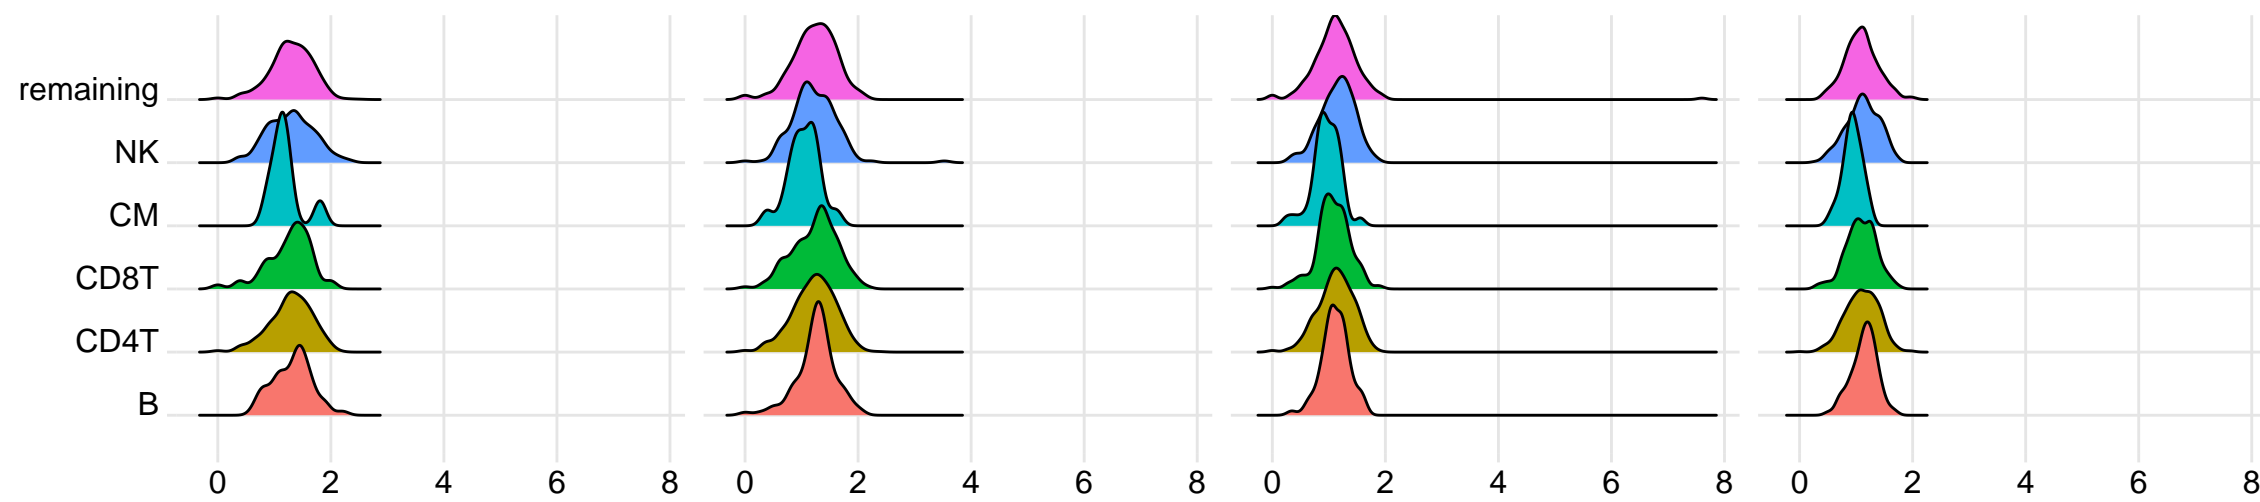**anti.c.Met**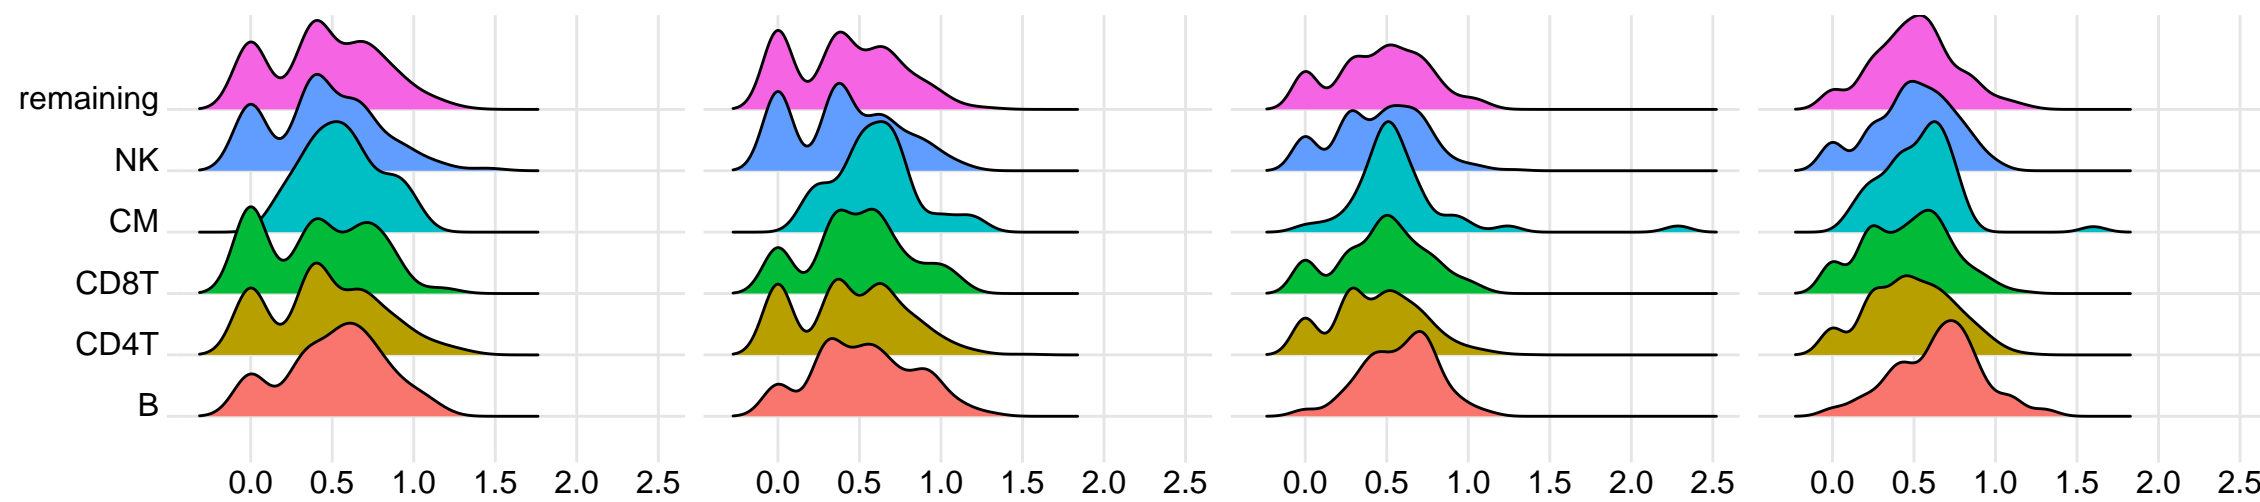**CD103**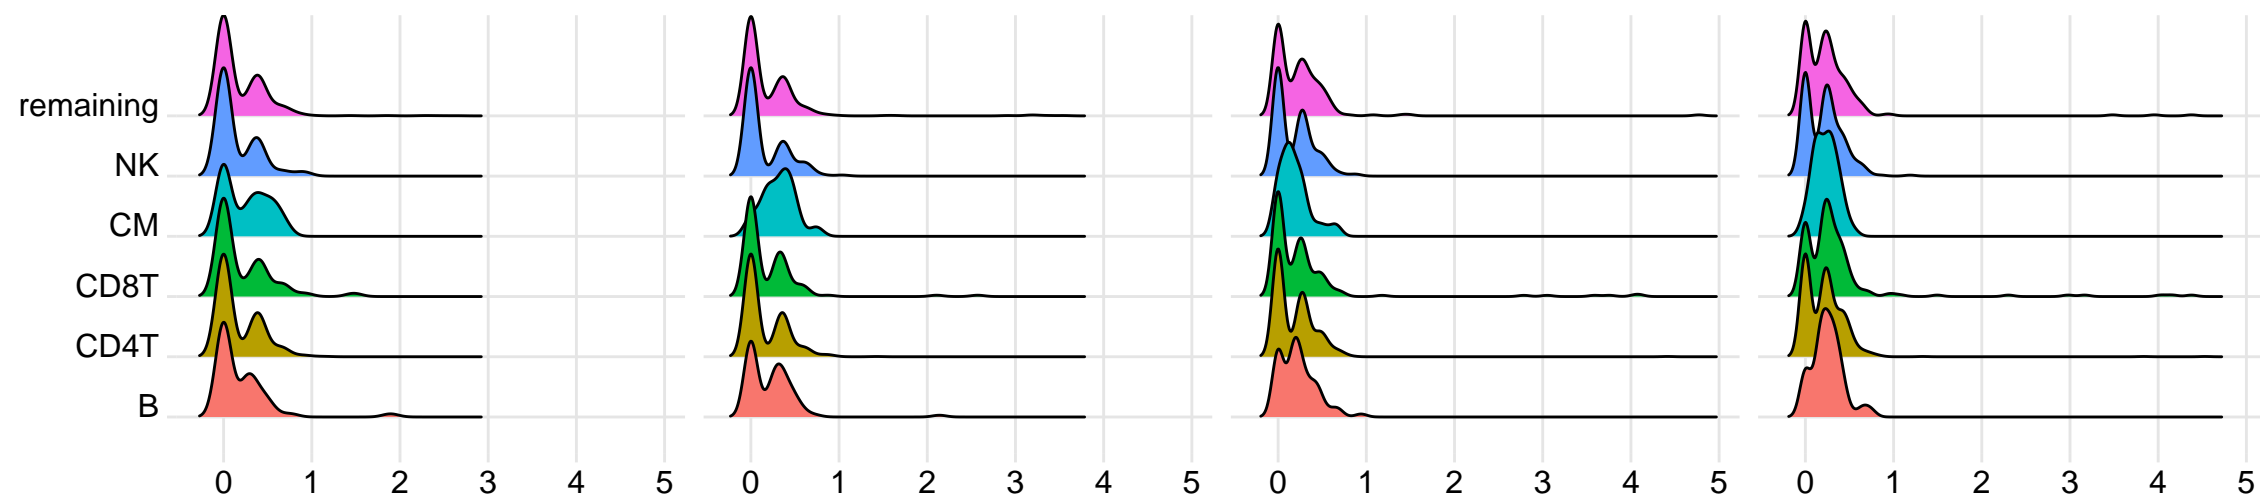**CD106**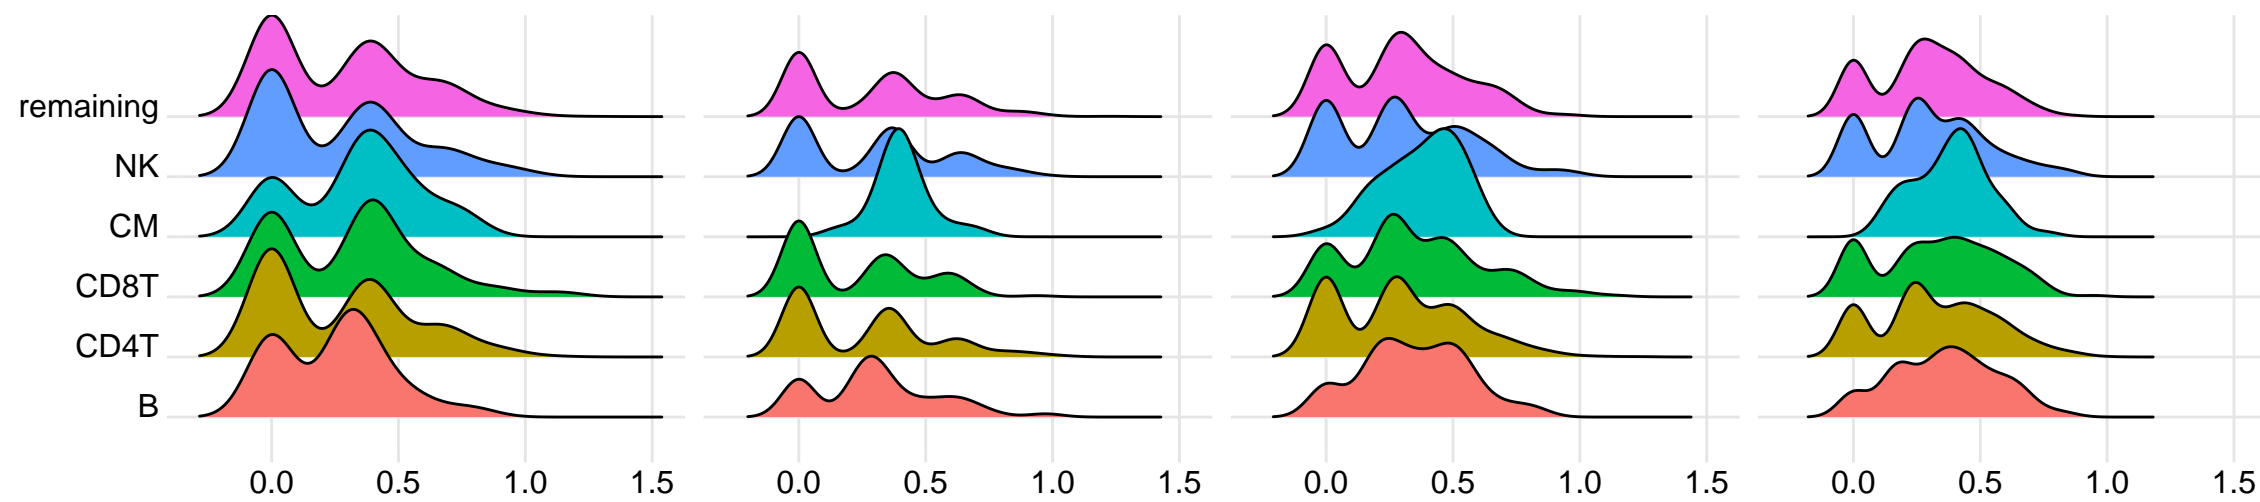

**CD112**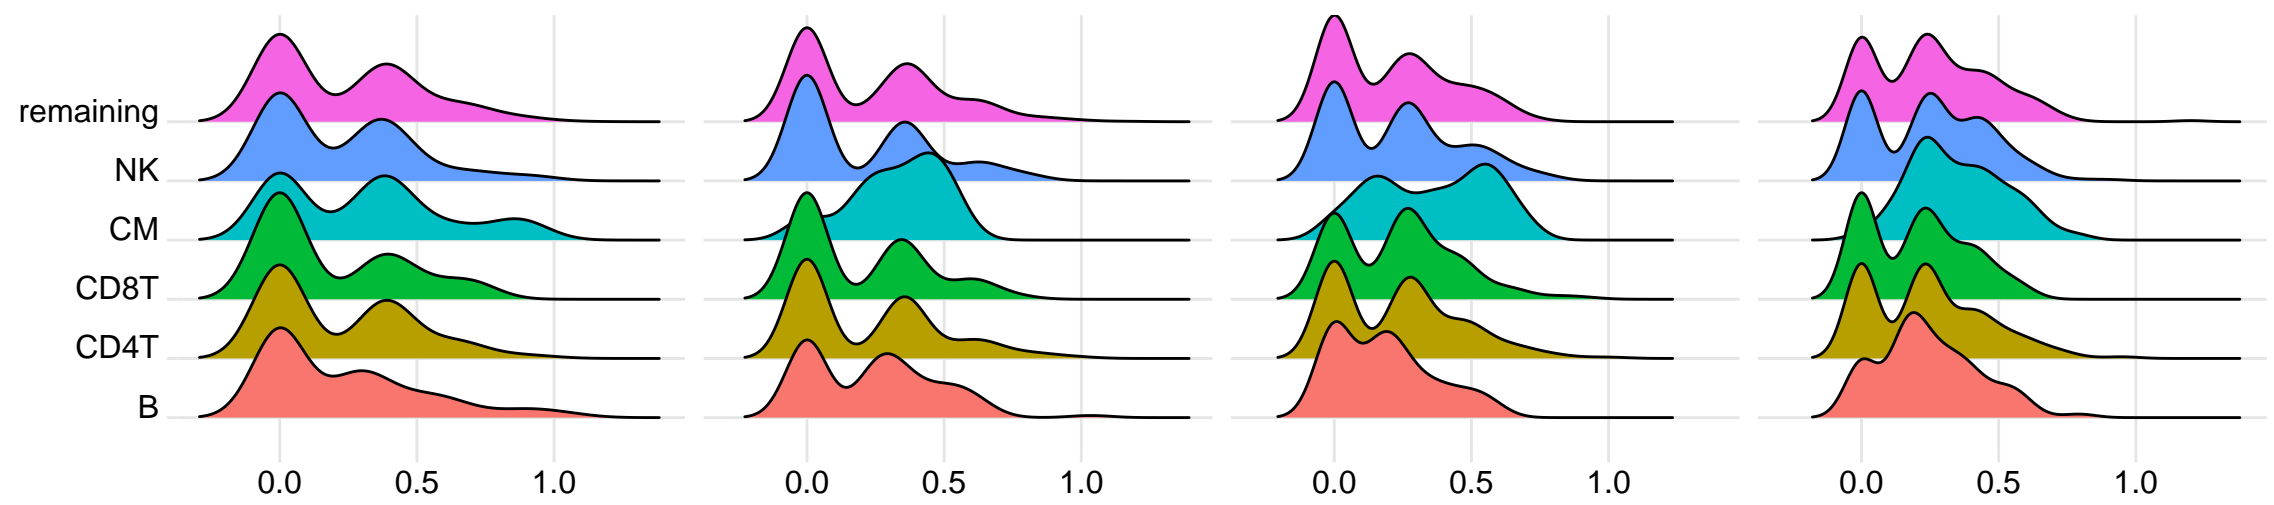**CD117**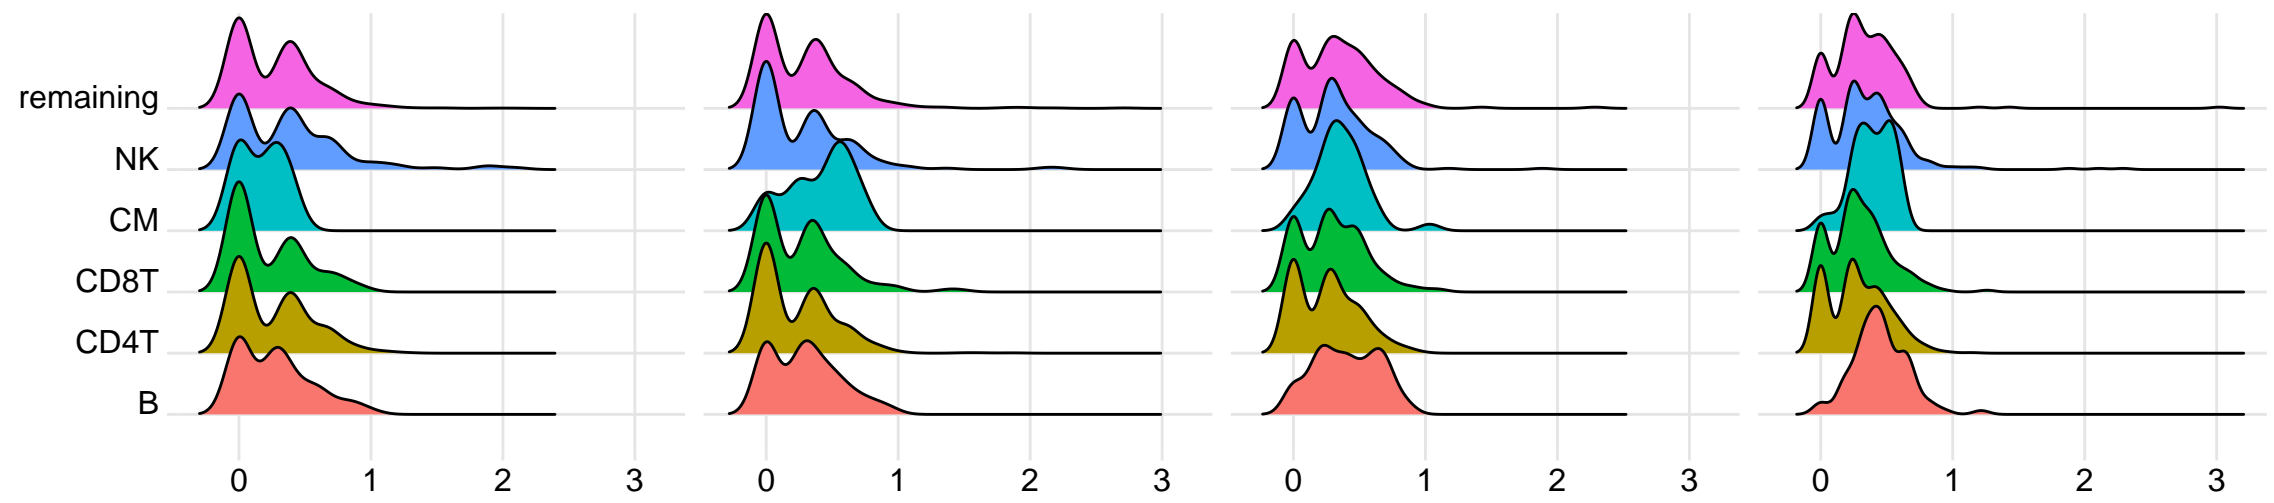**CD124**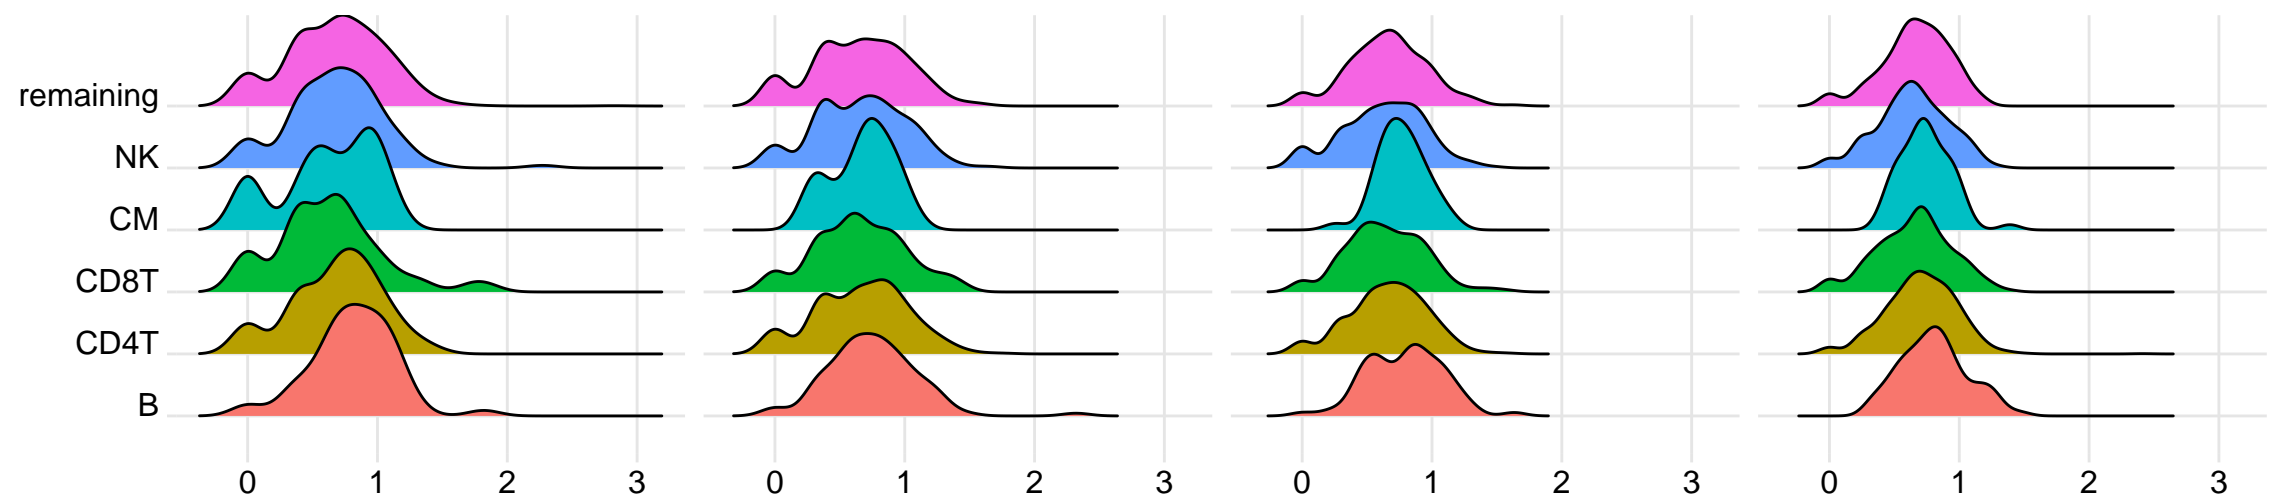**CD133**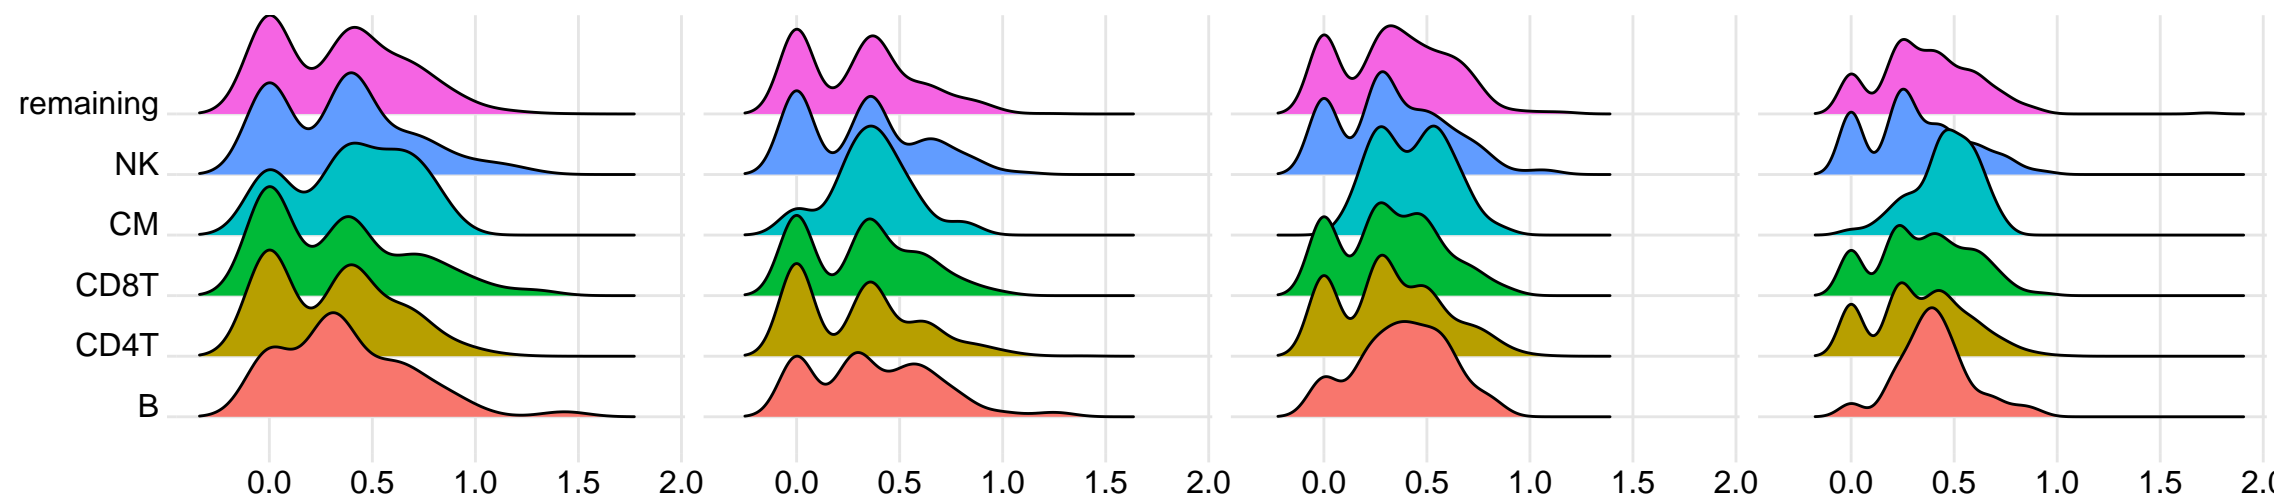**CD137L**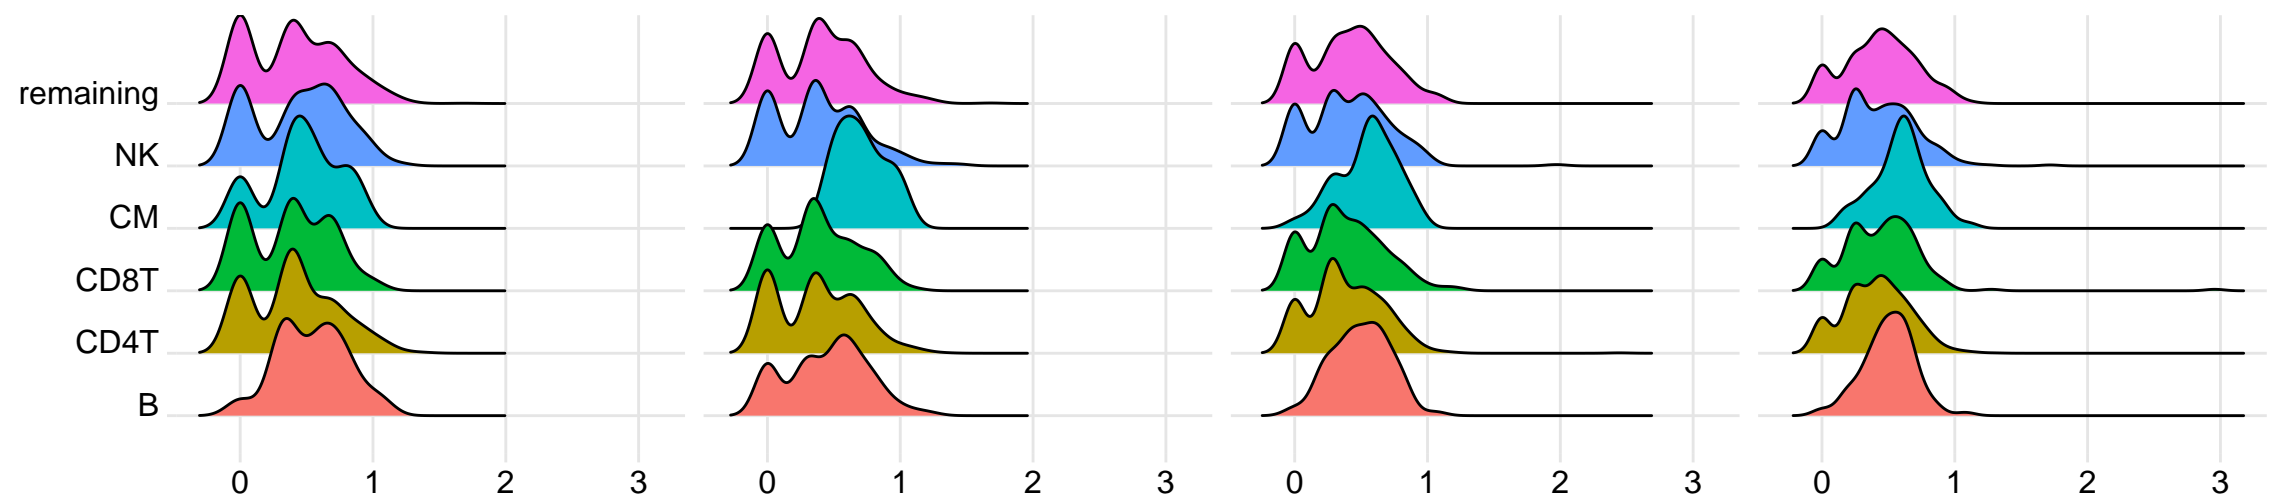

**CD138**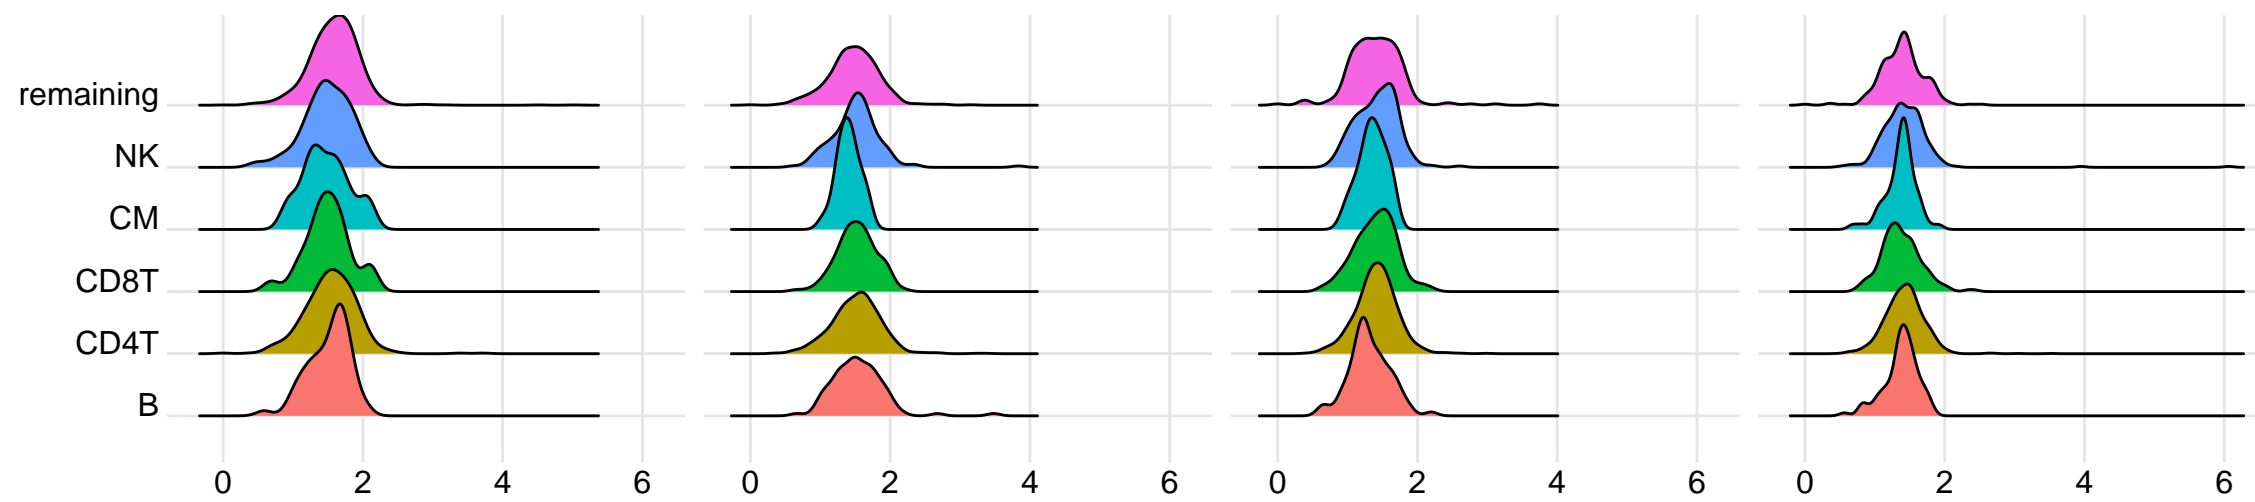**CD144**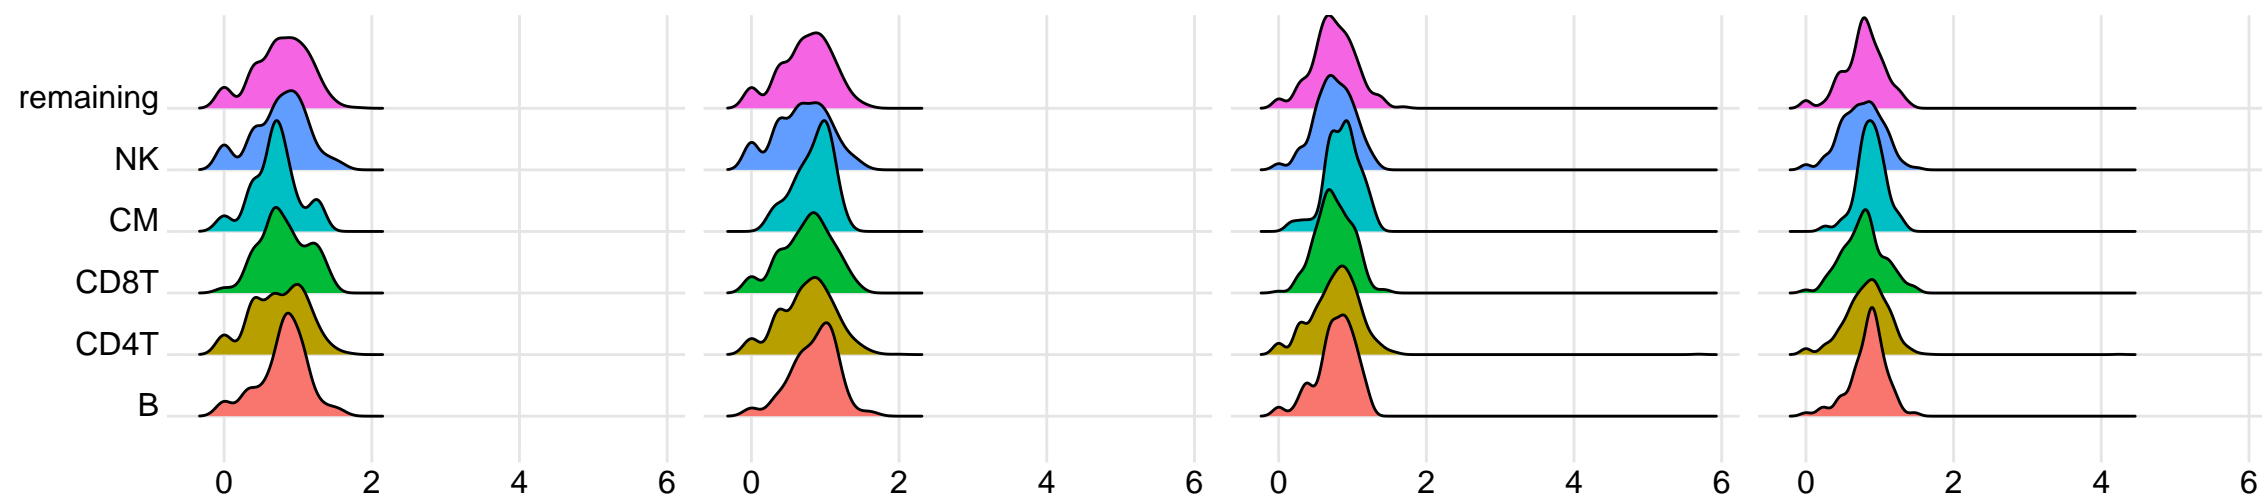**CD146**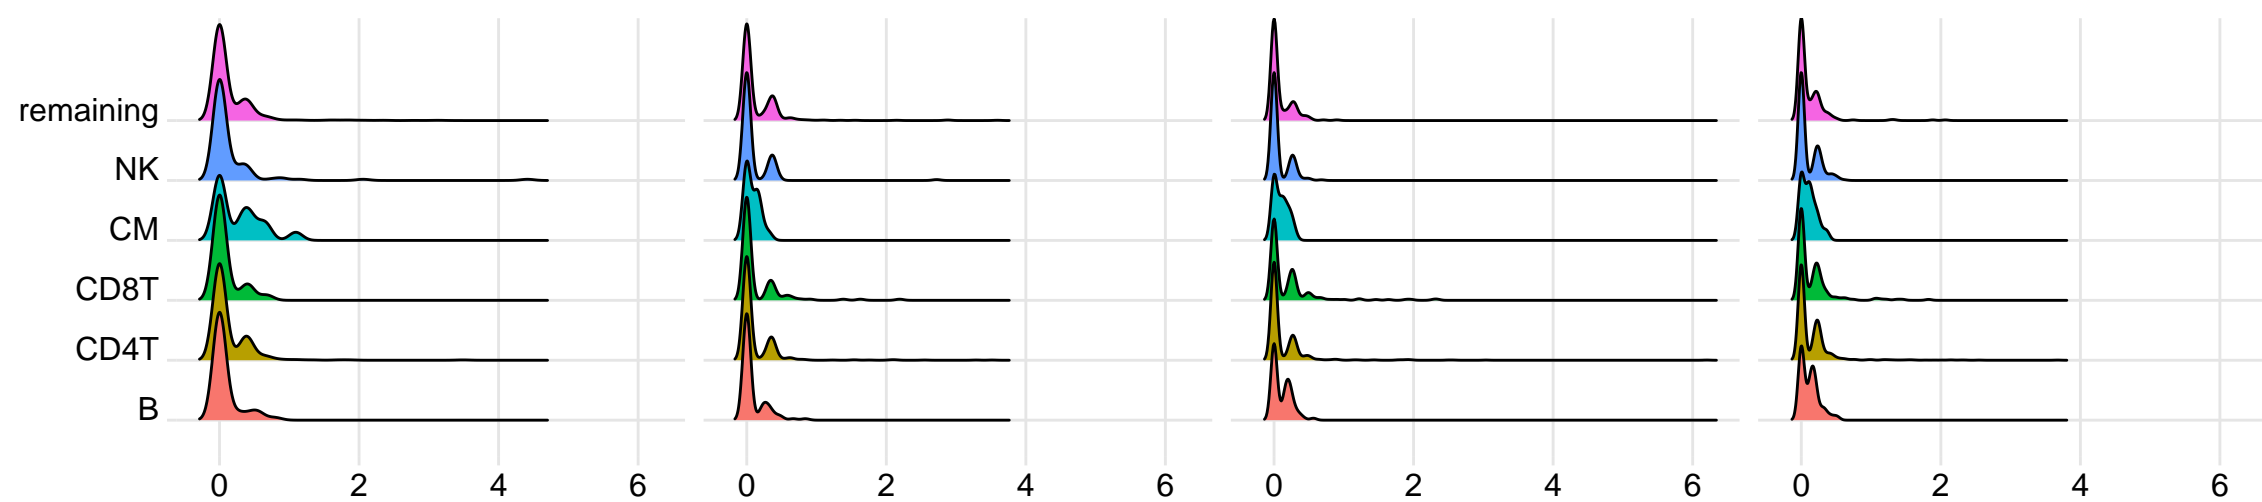**CD152**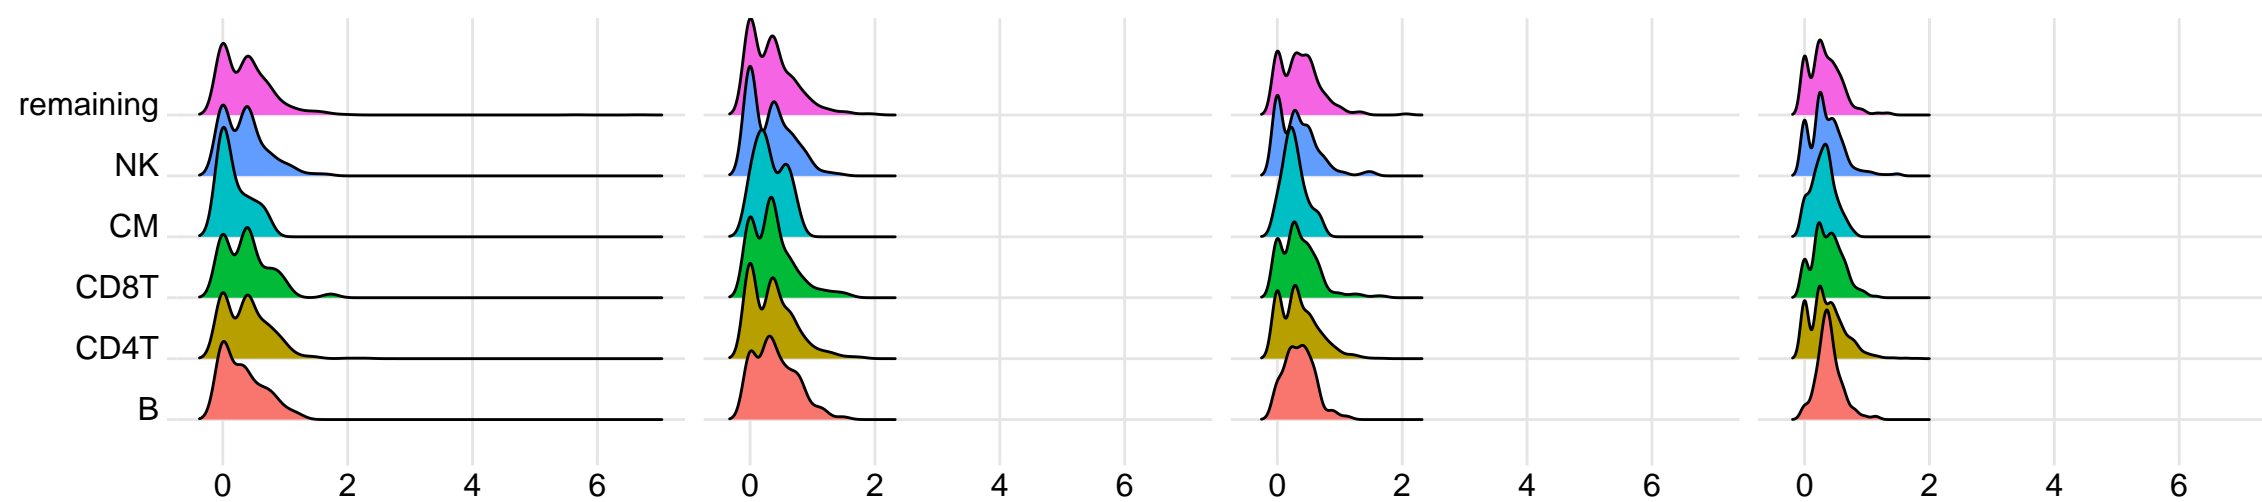**CD169**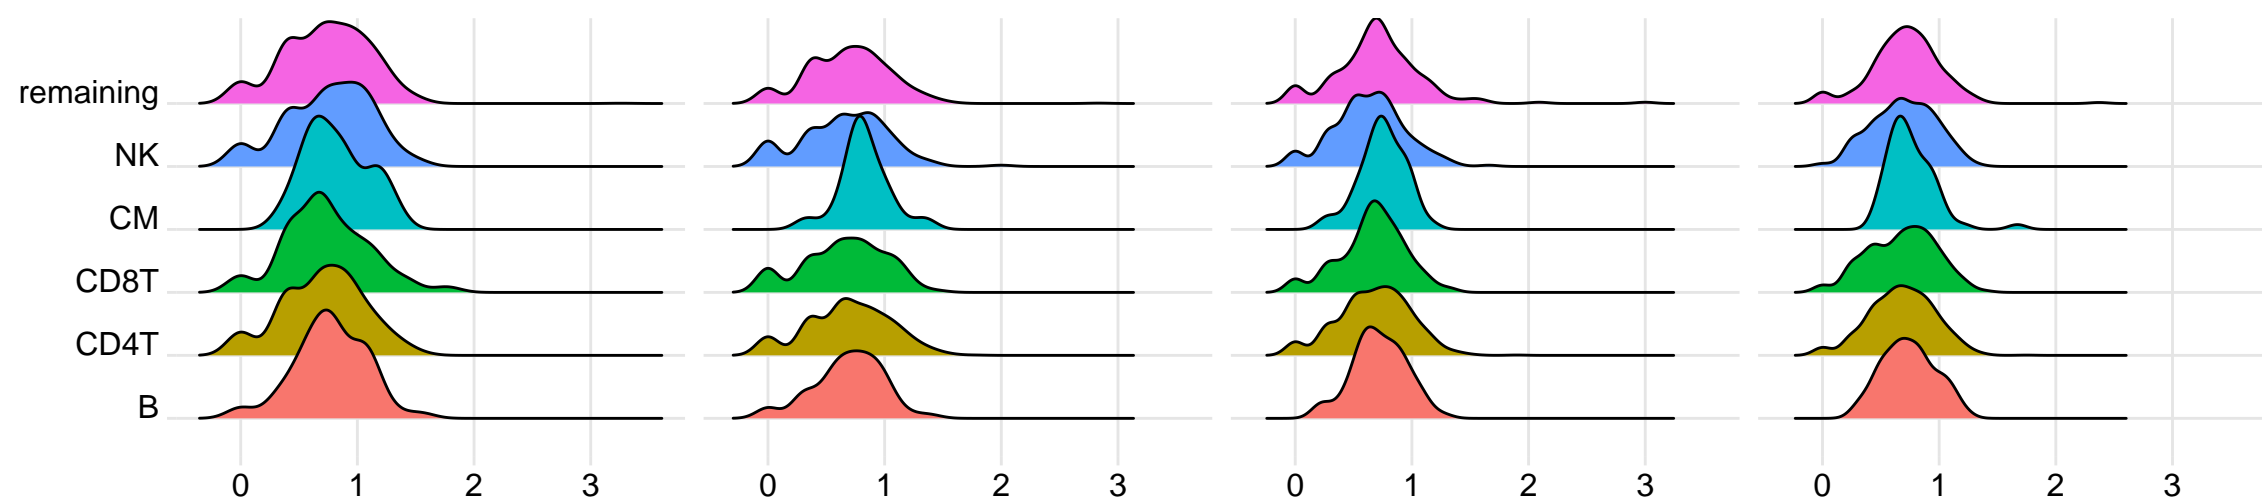

**CD178**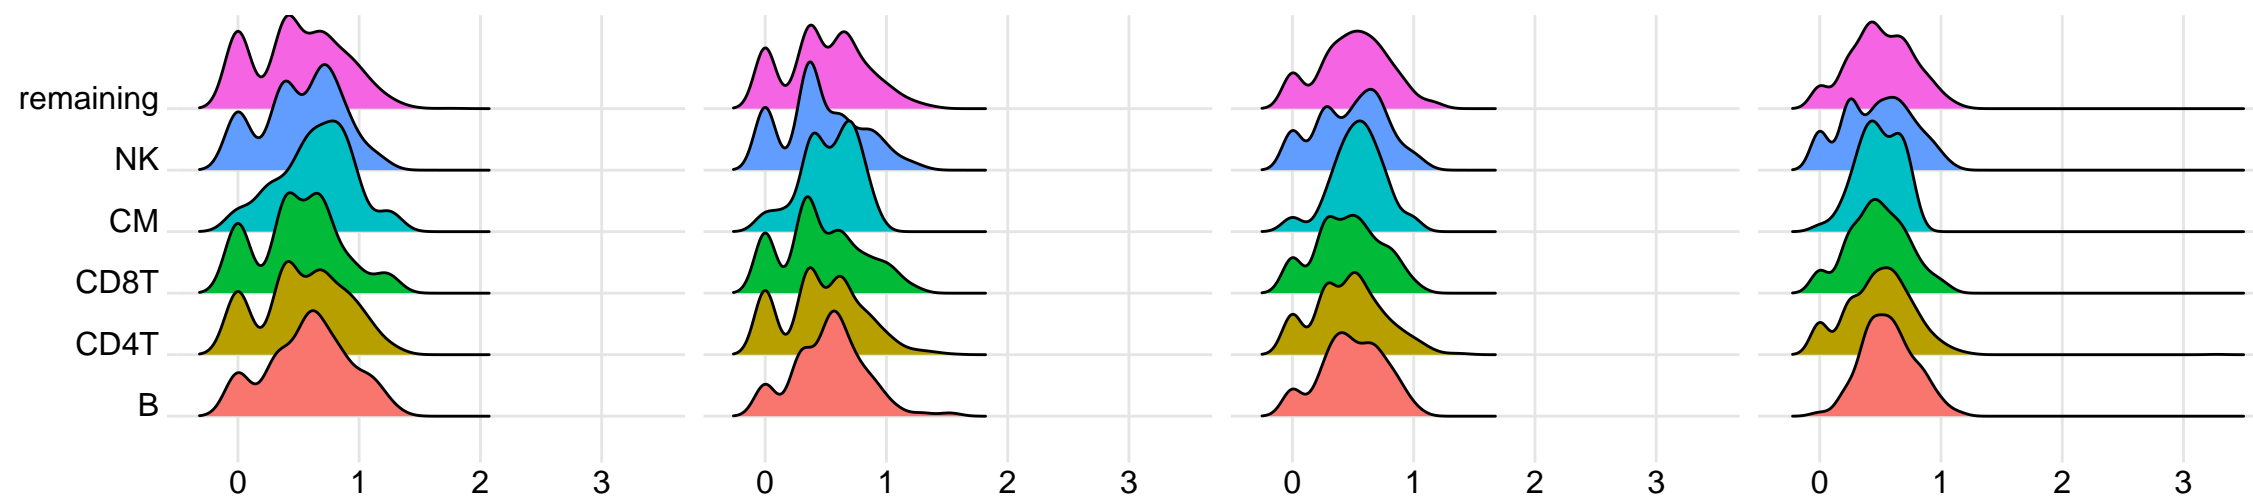**CD184**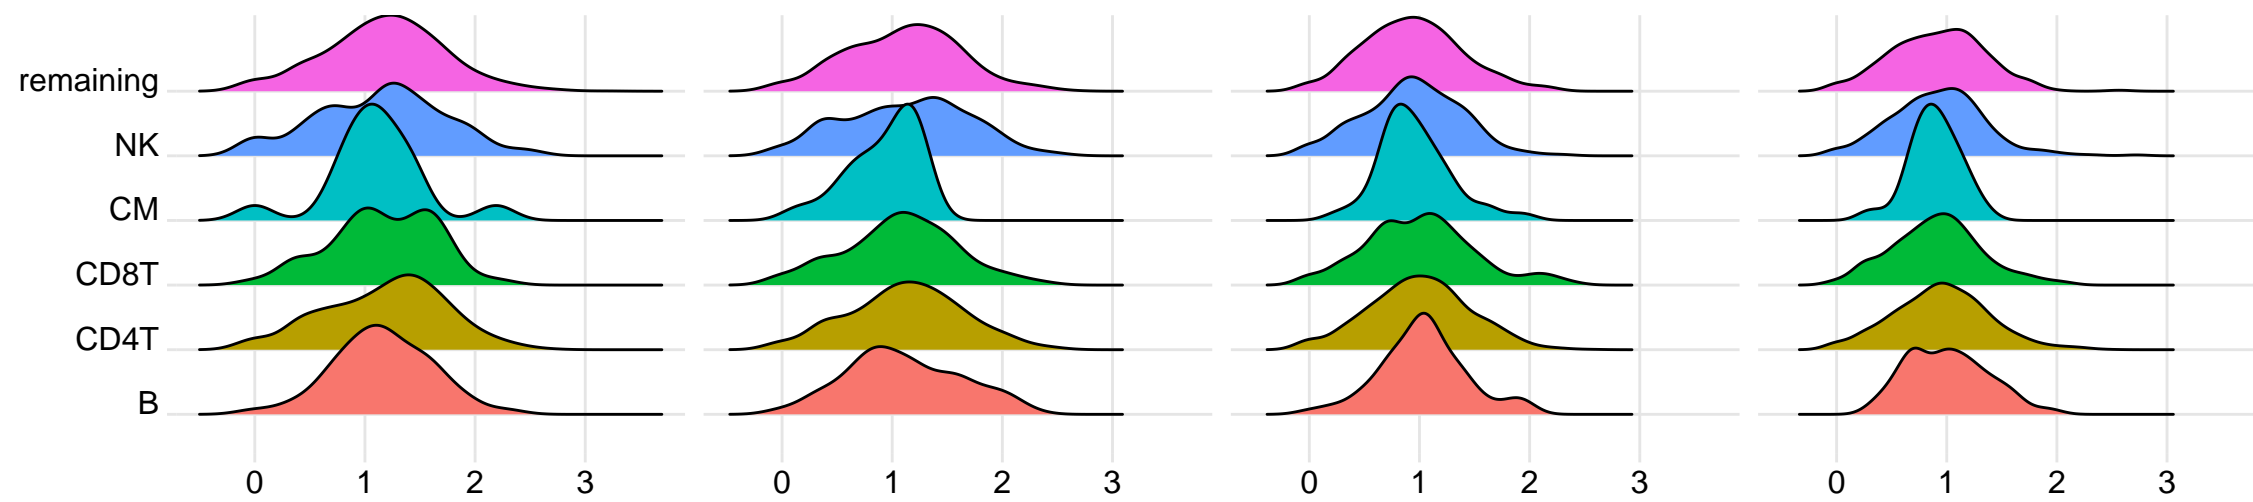**CD193**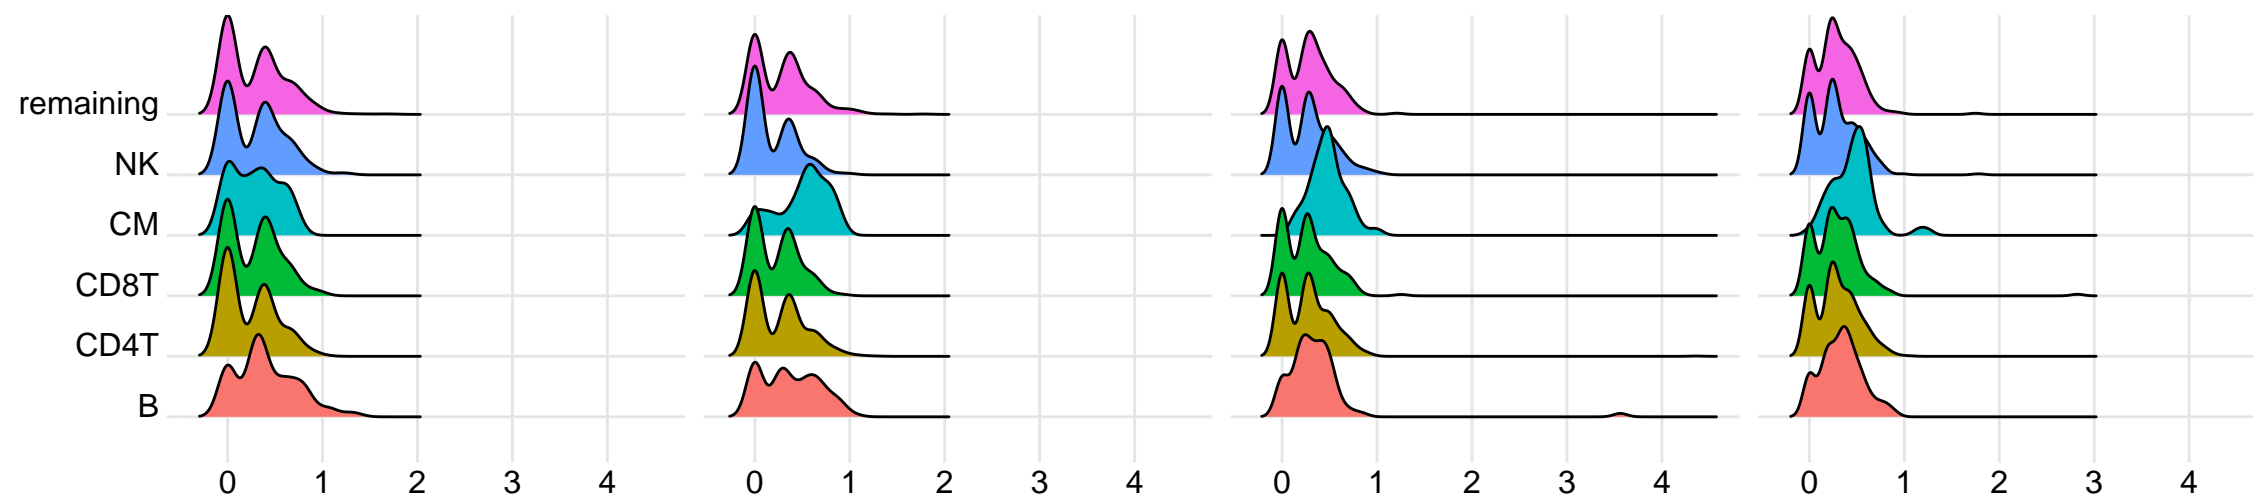**CD1a**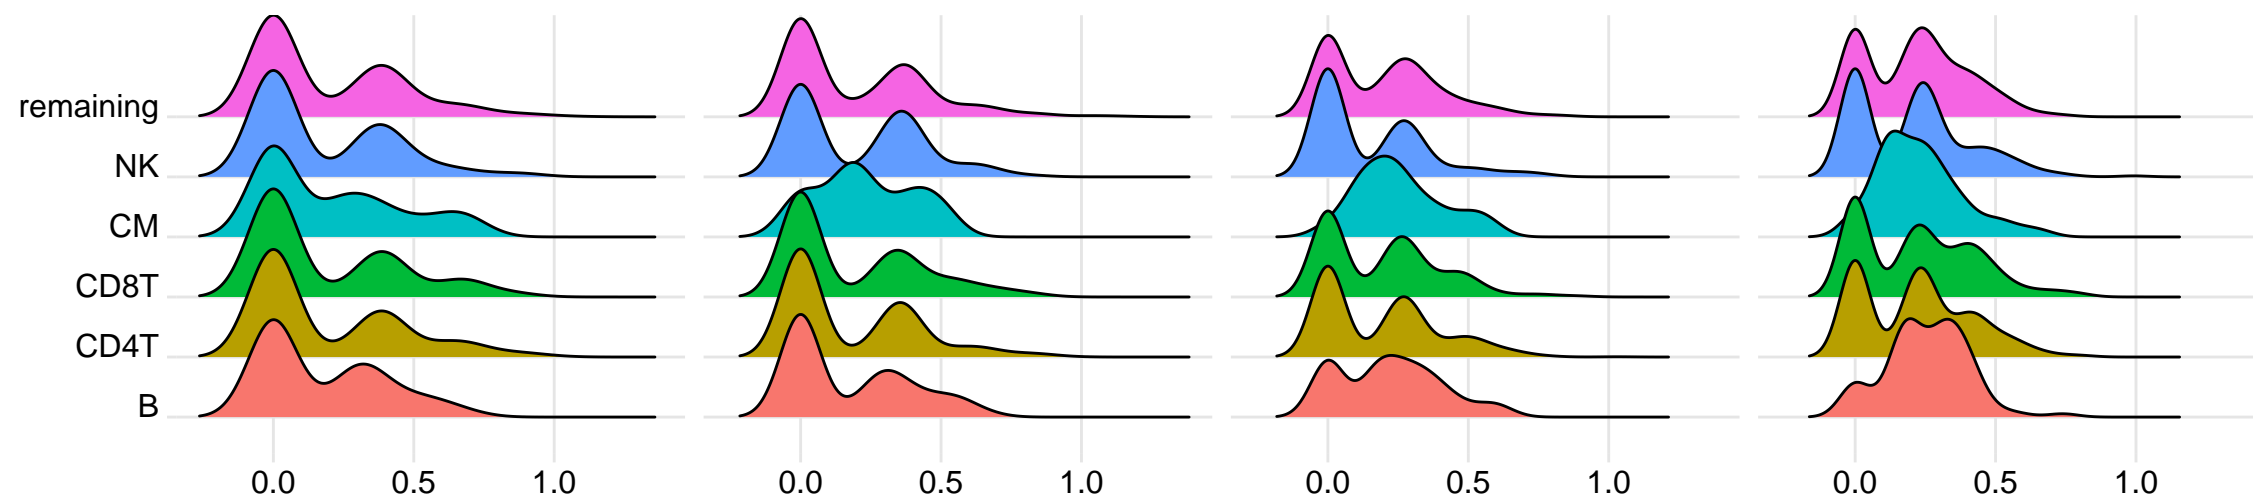**CD204**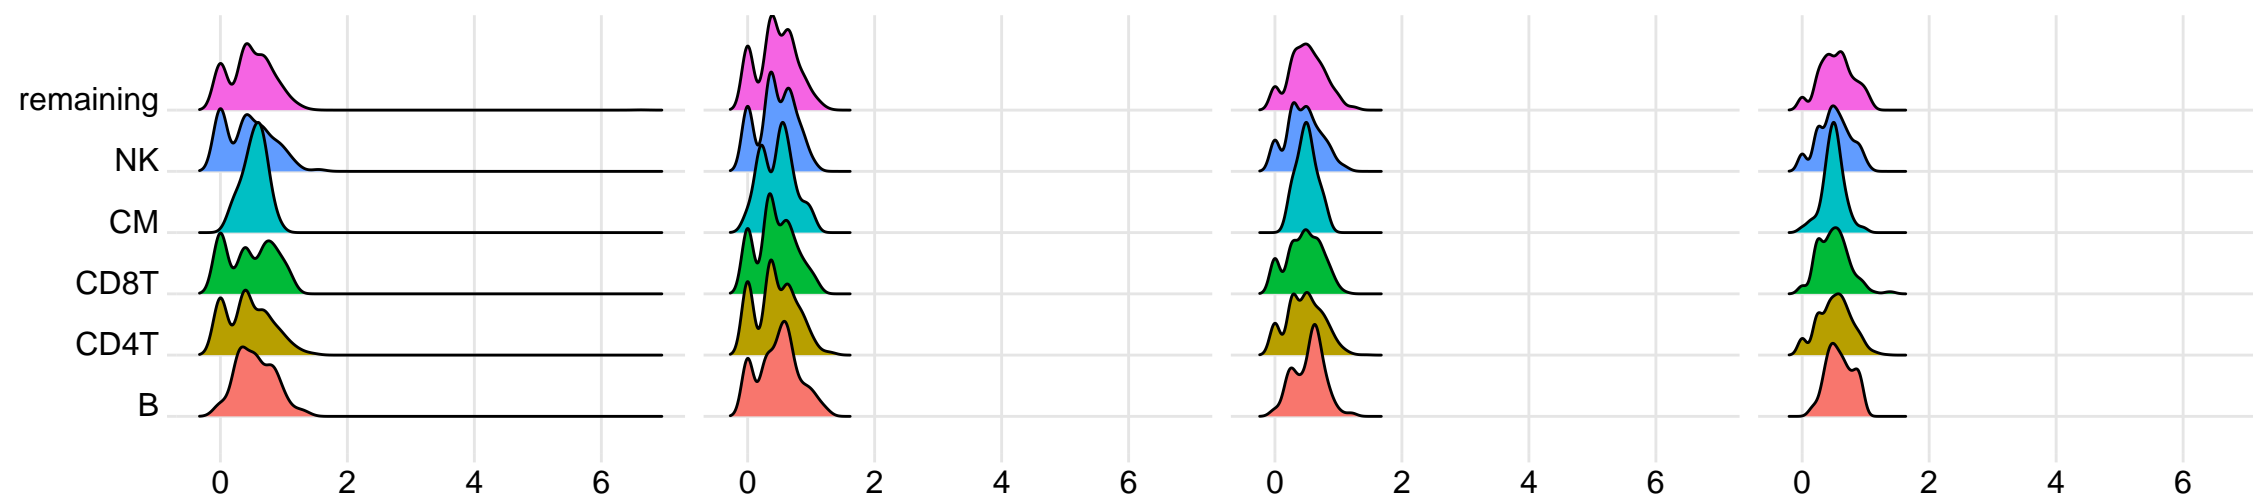

**CD206**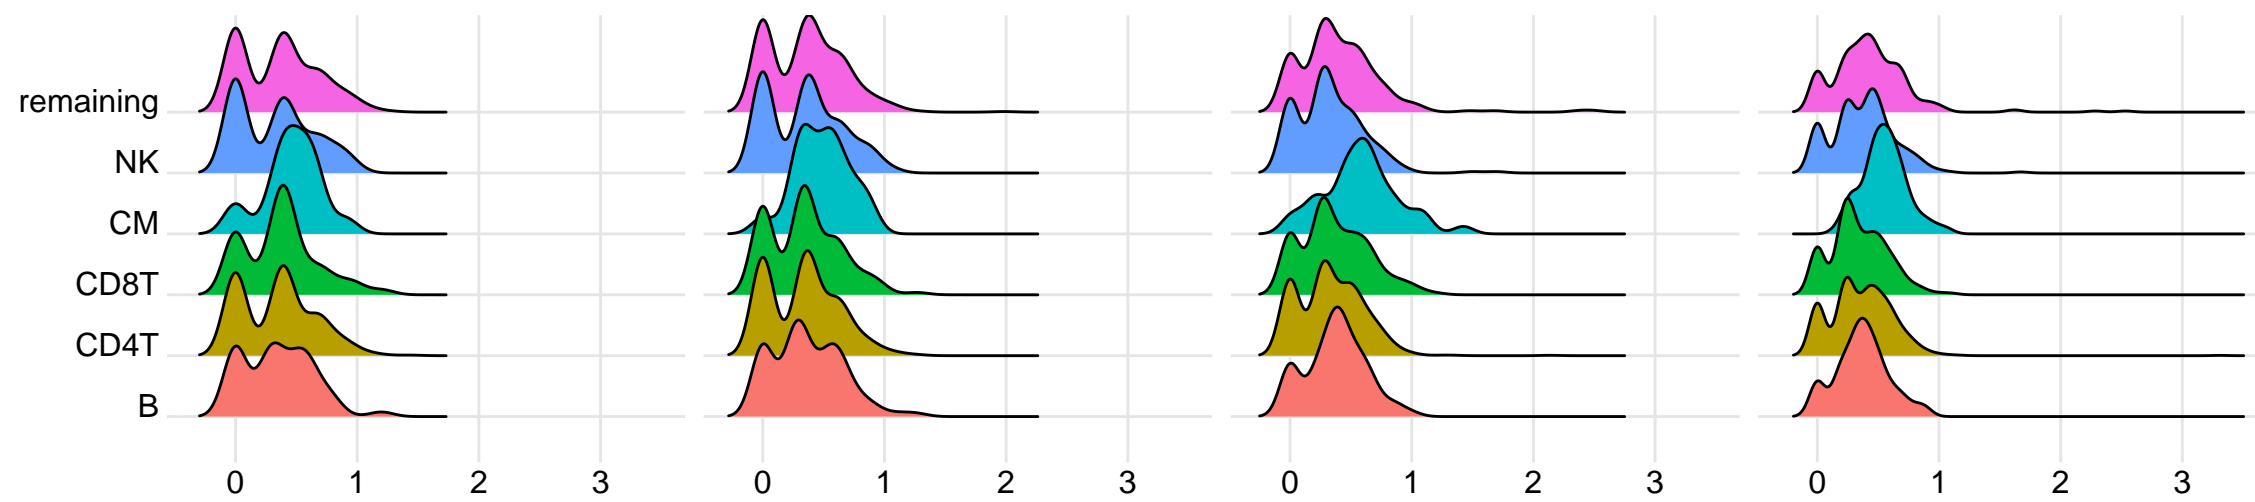**CD207**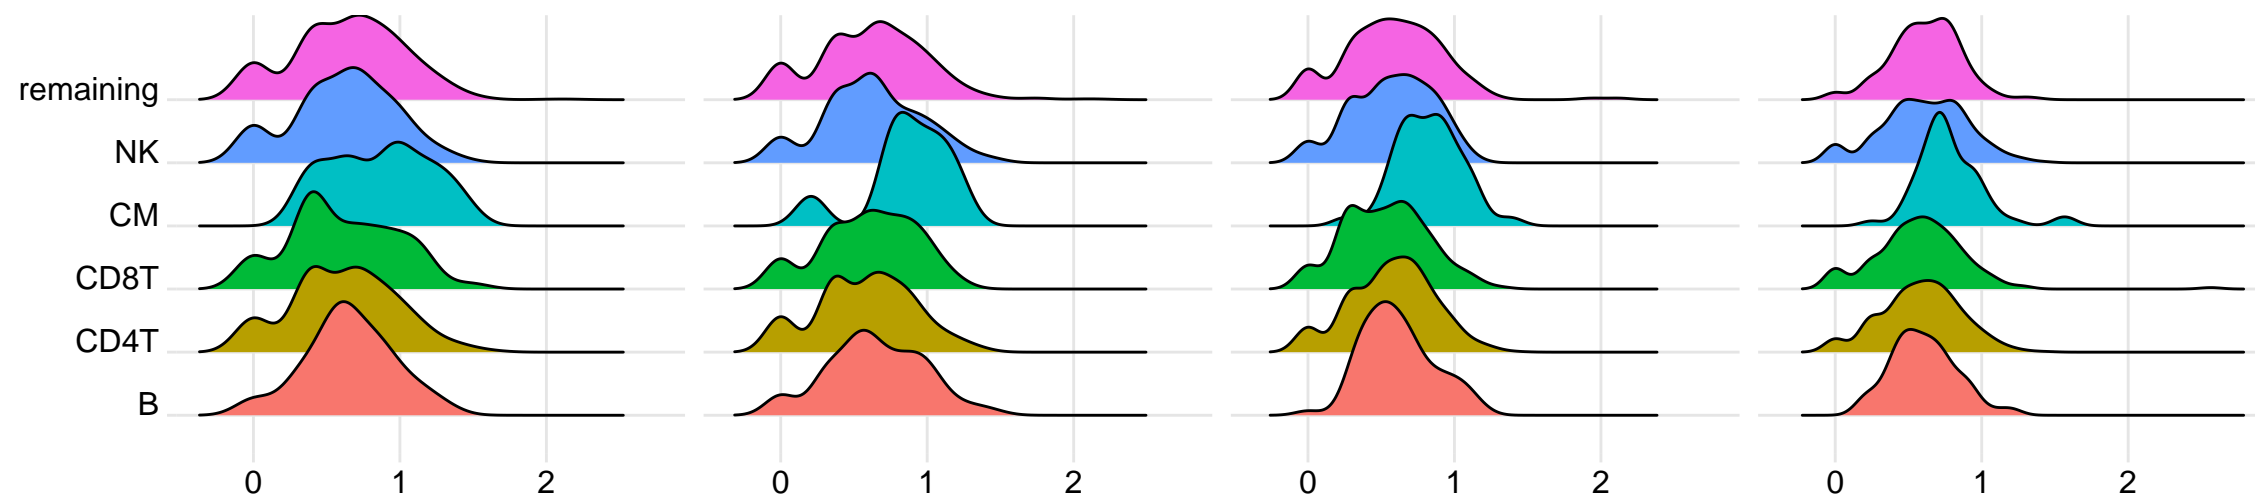**CD209**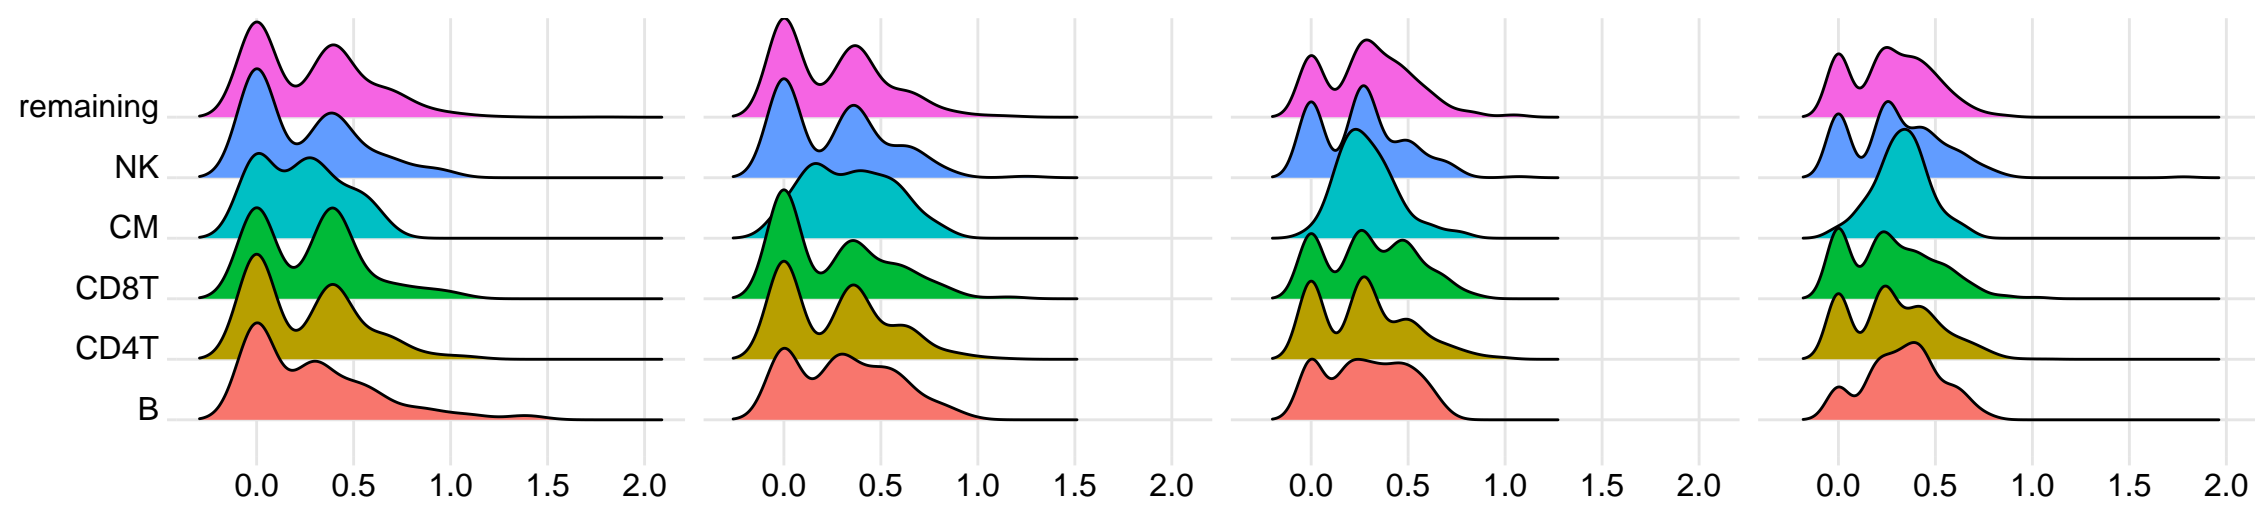**CD235ab**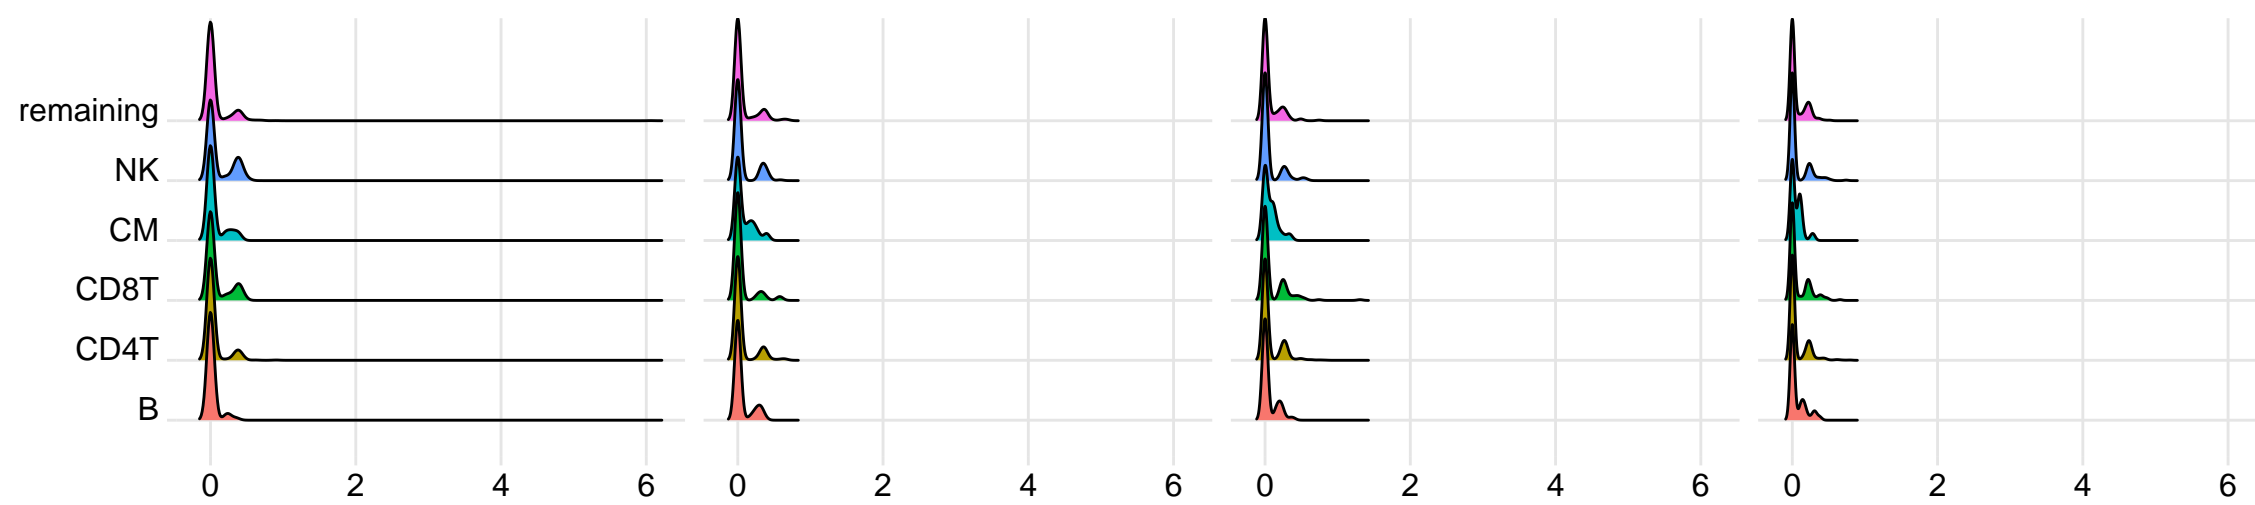**CD252**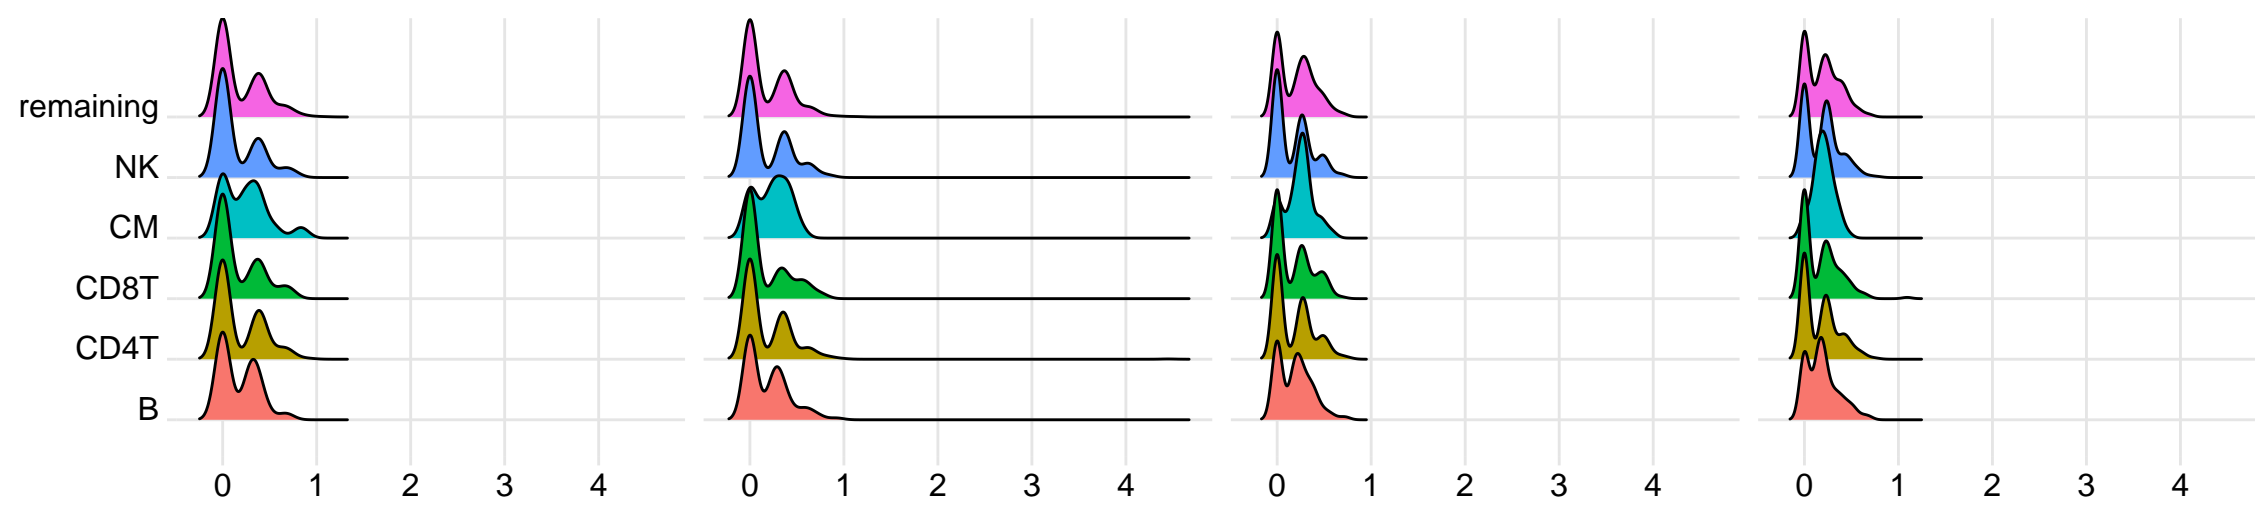

**CD257**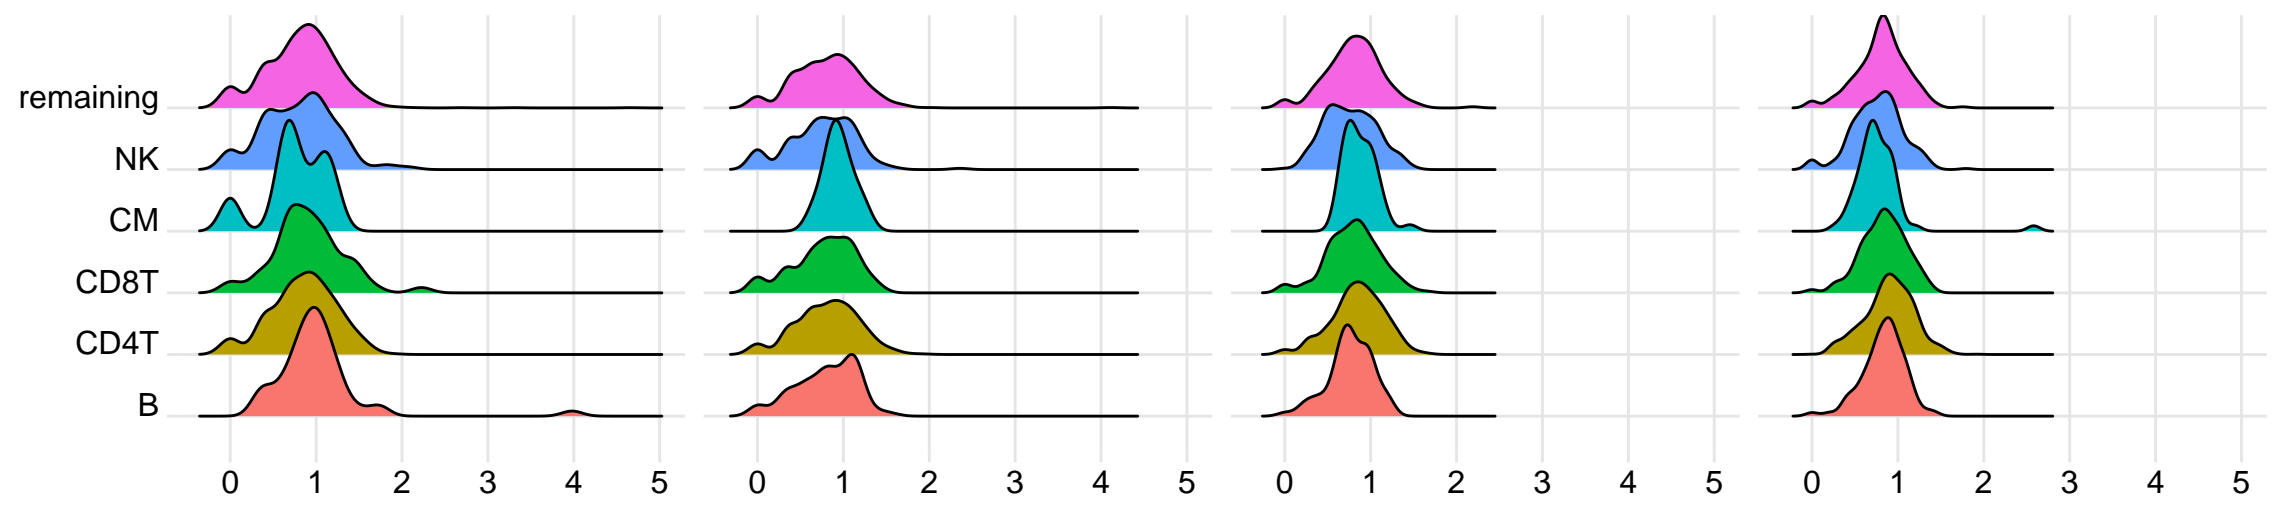**CD258**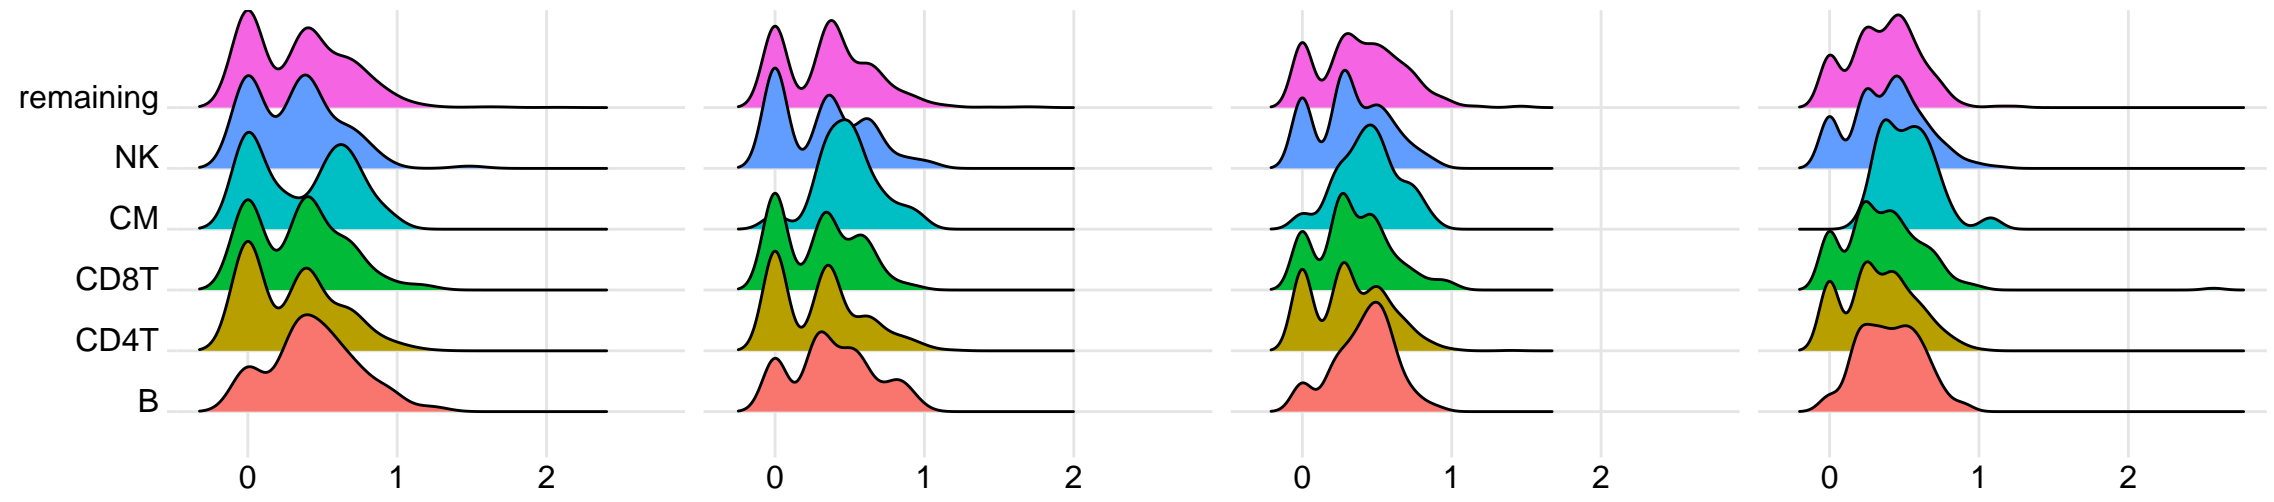**CD269**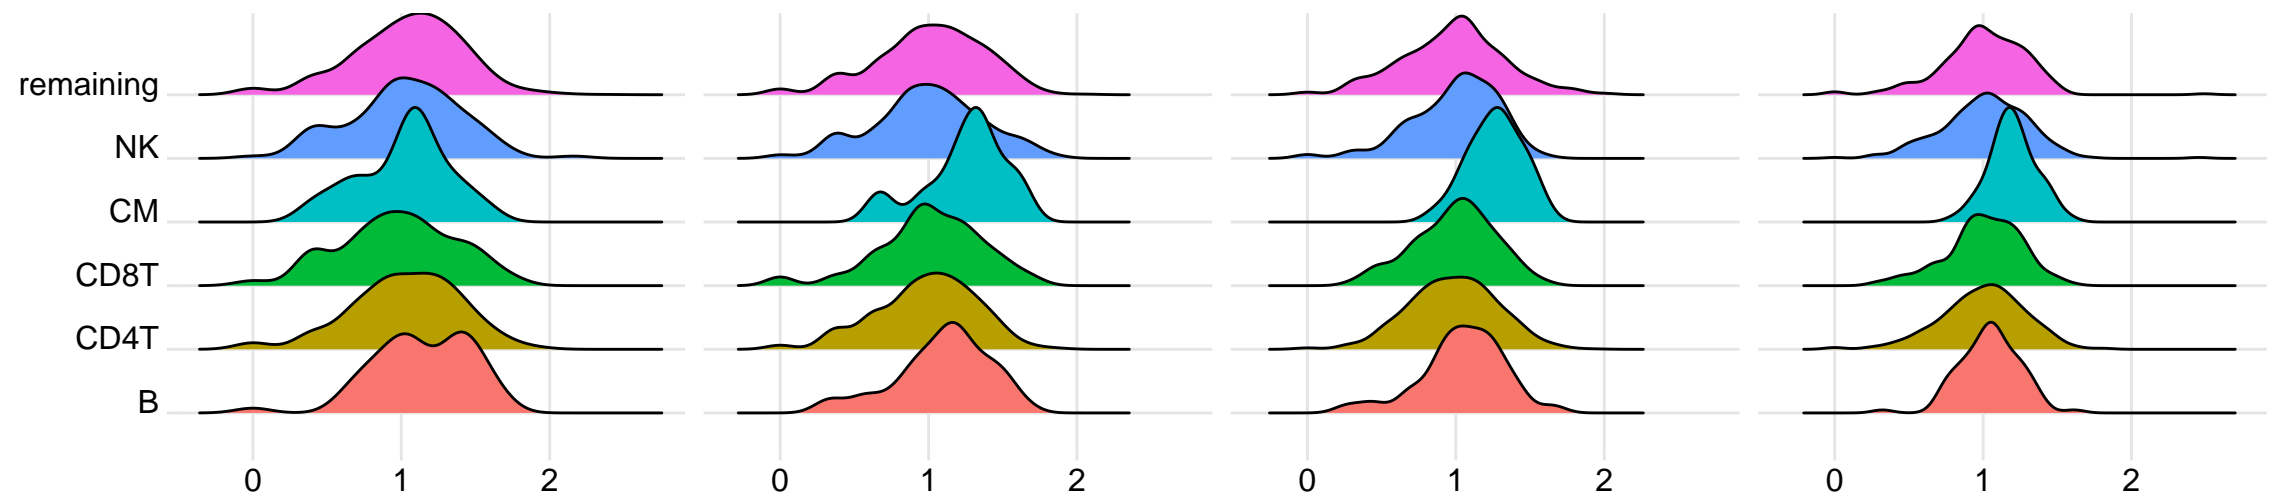**CD273**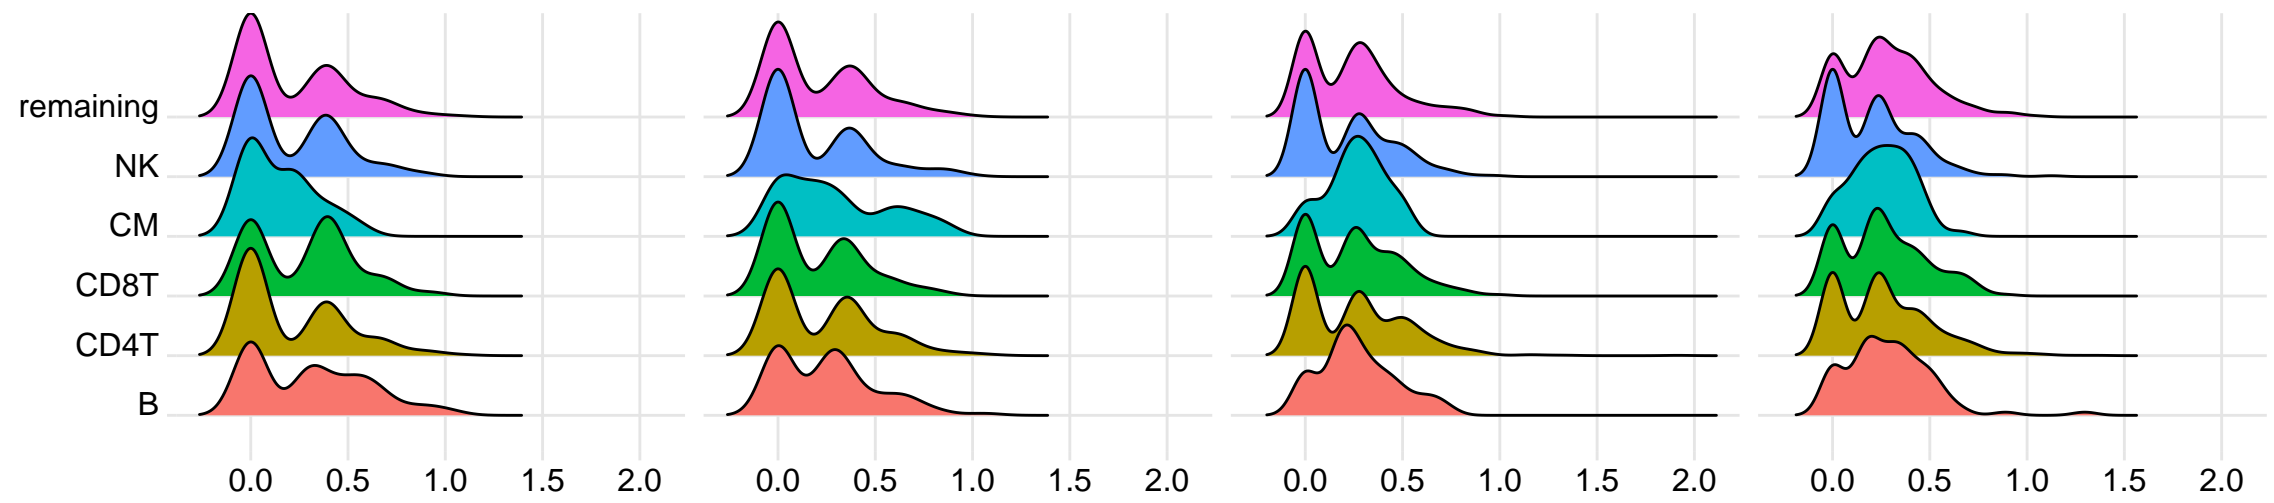**CD274**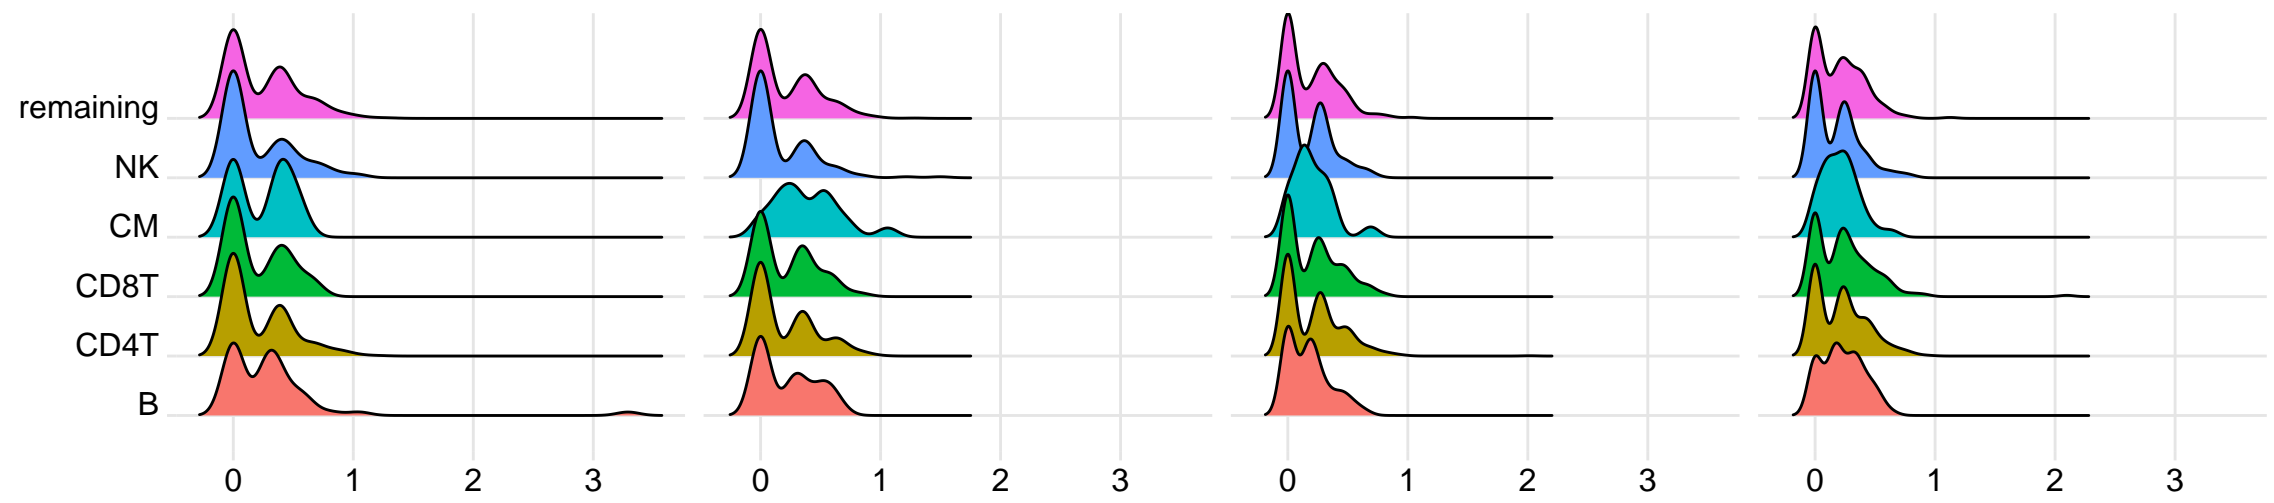



**CD275**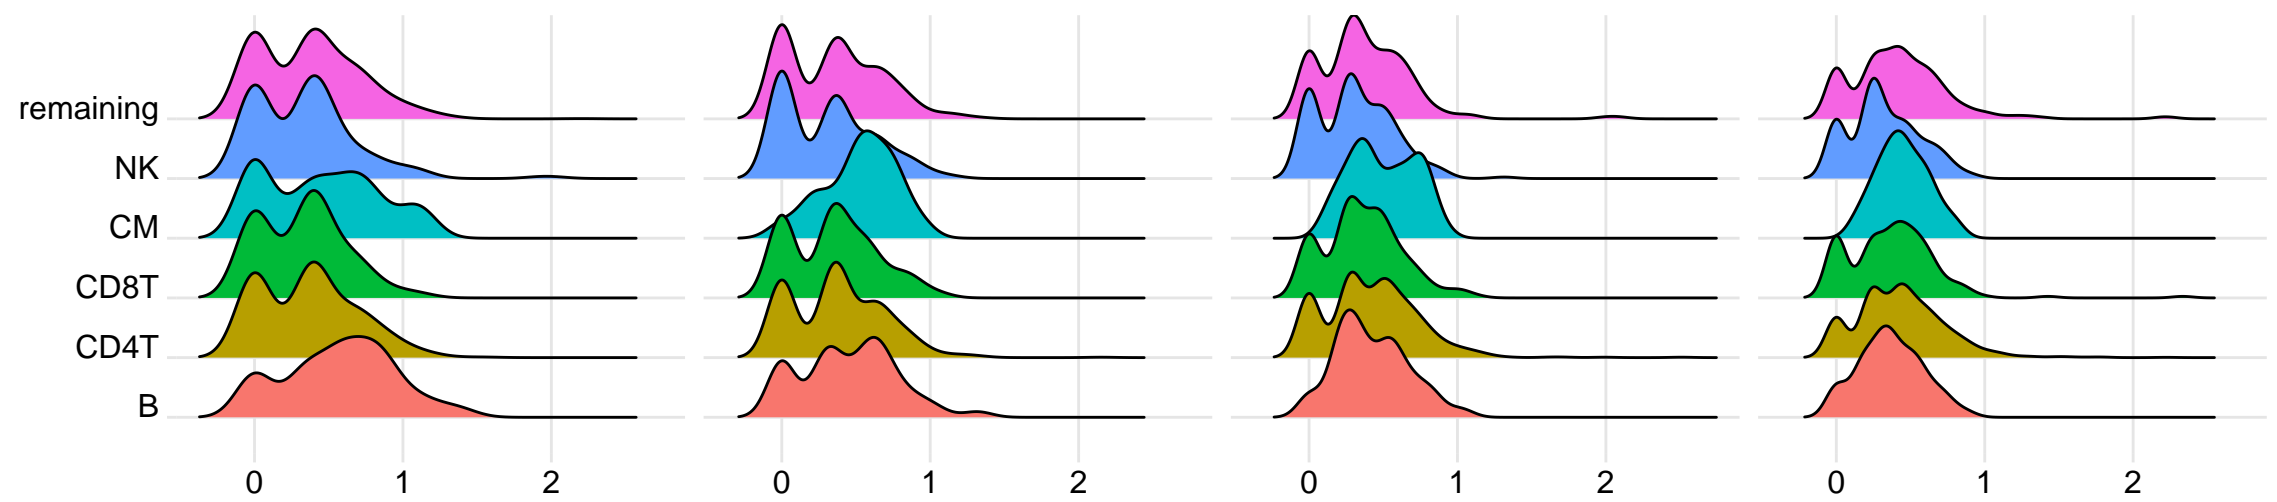**CD294**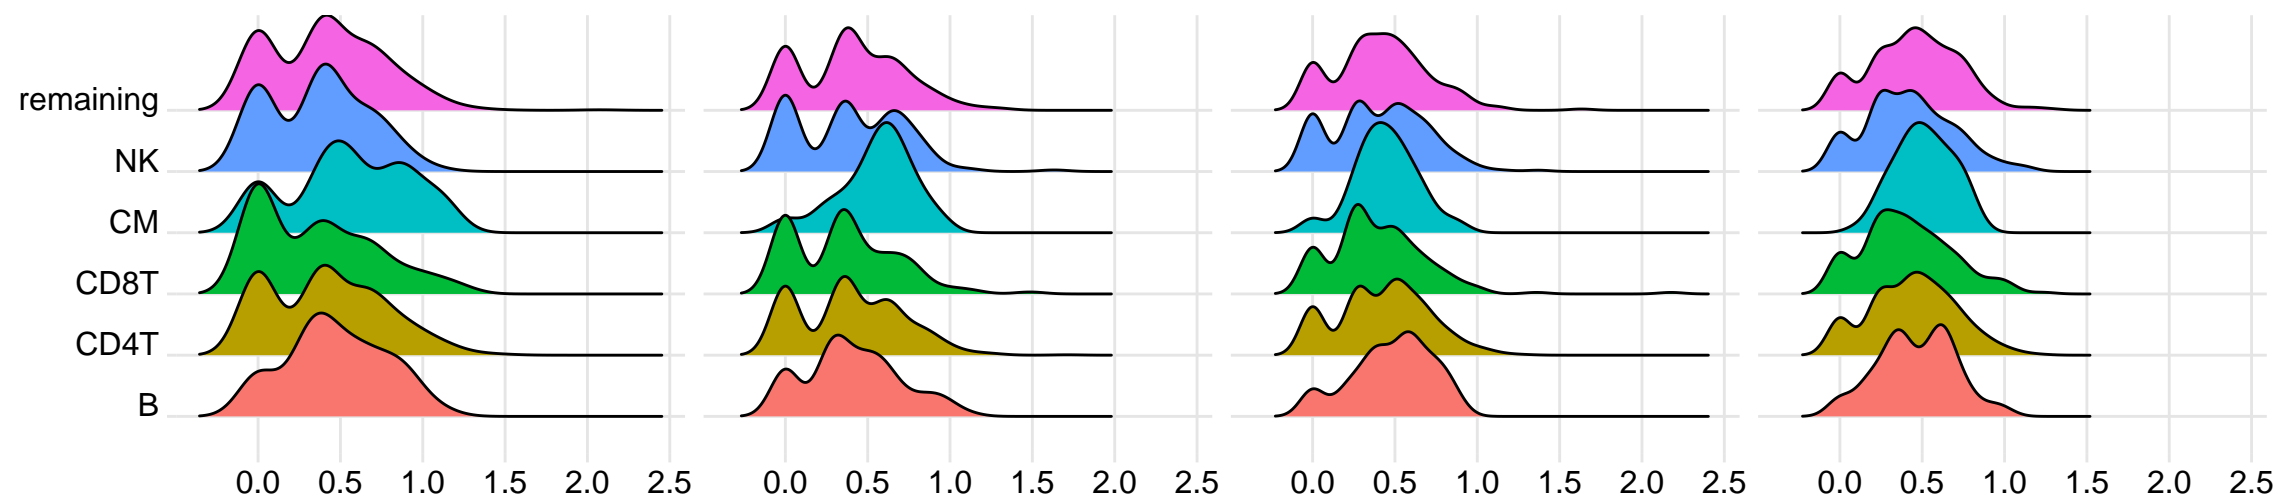**CD303**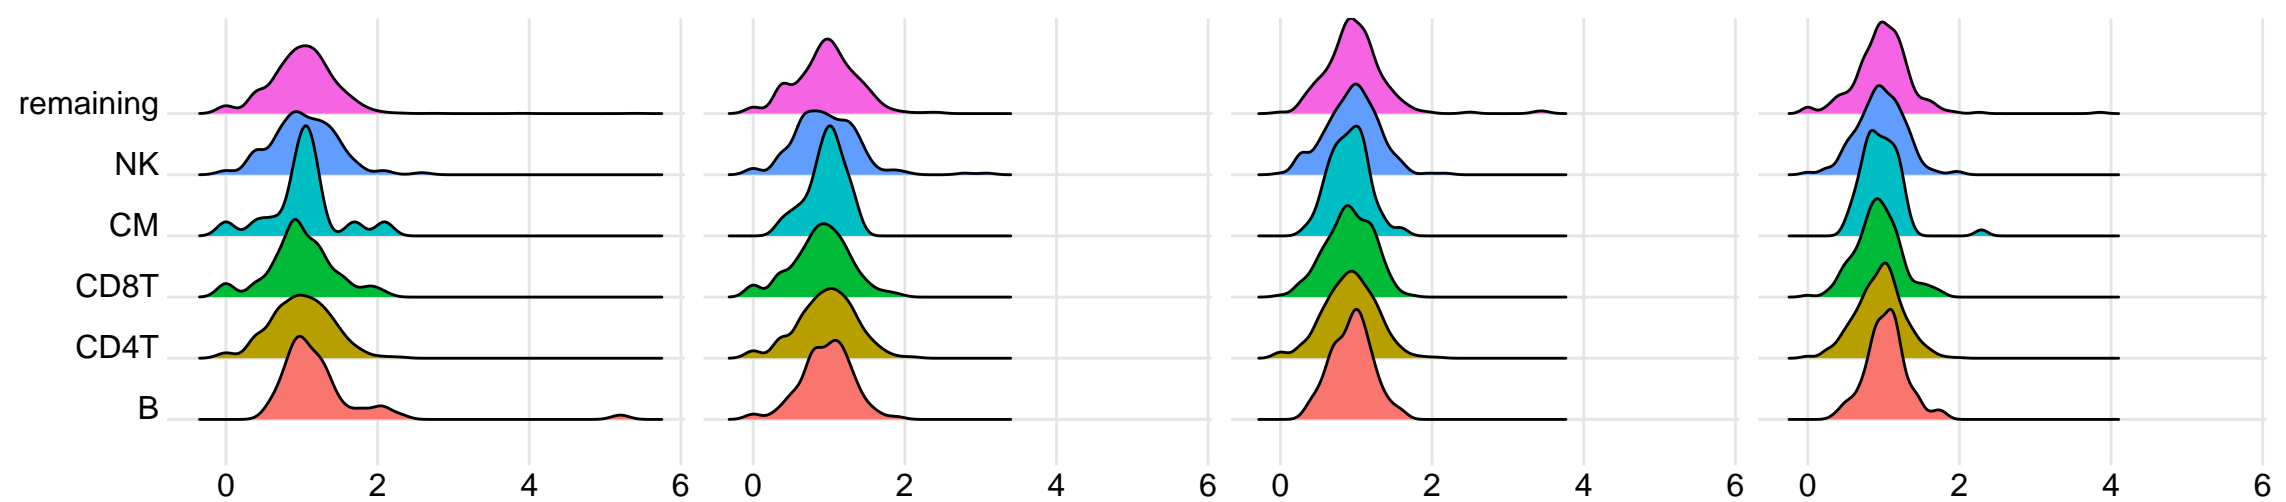**CD304**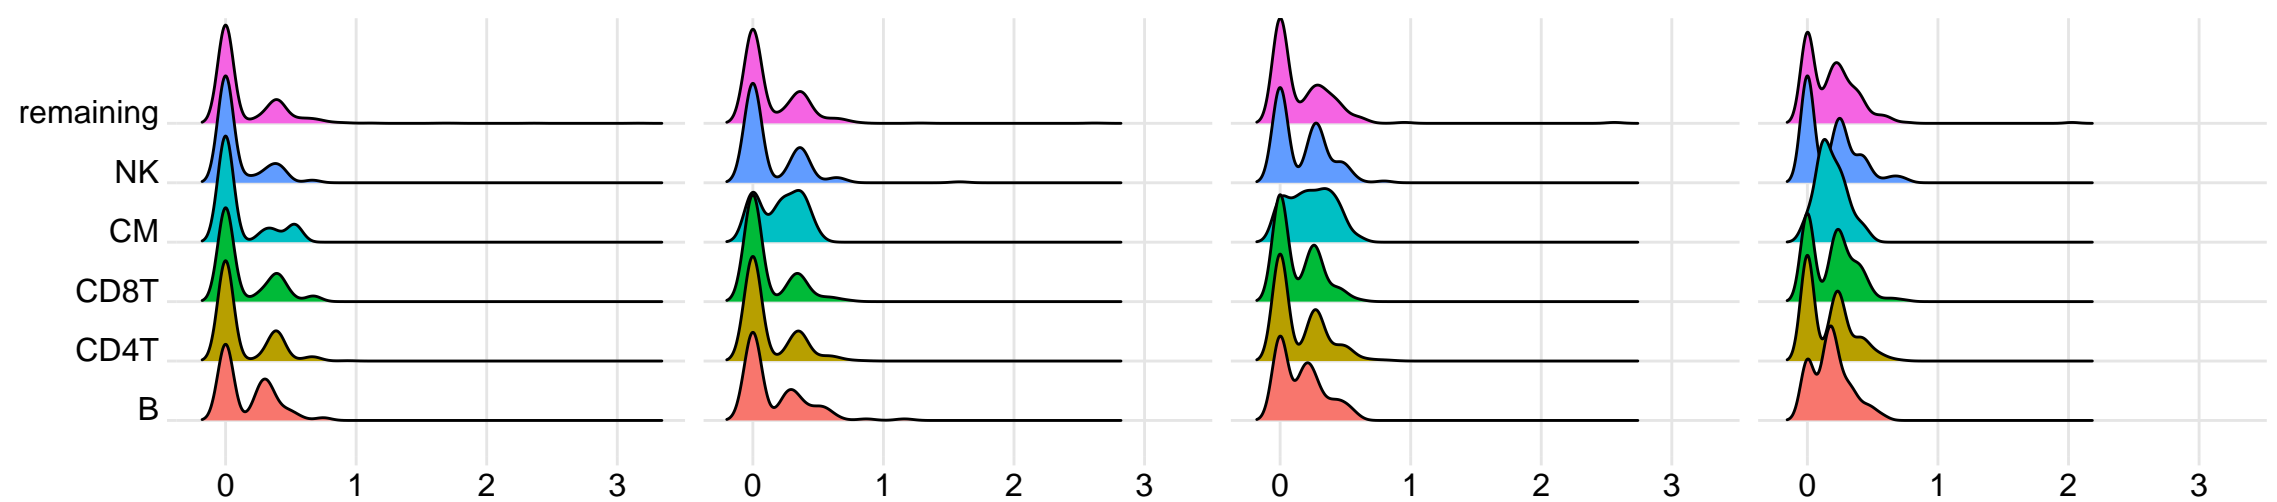**CD307e**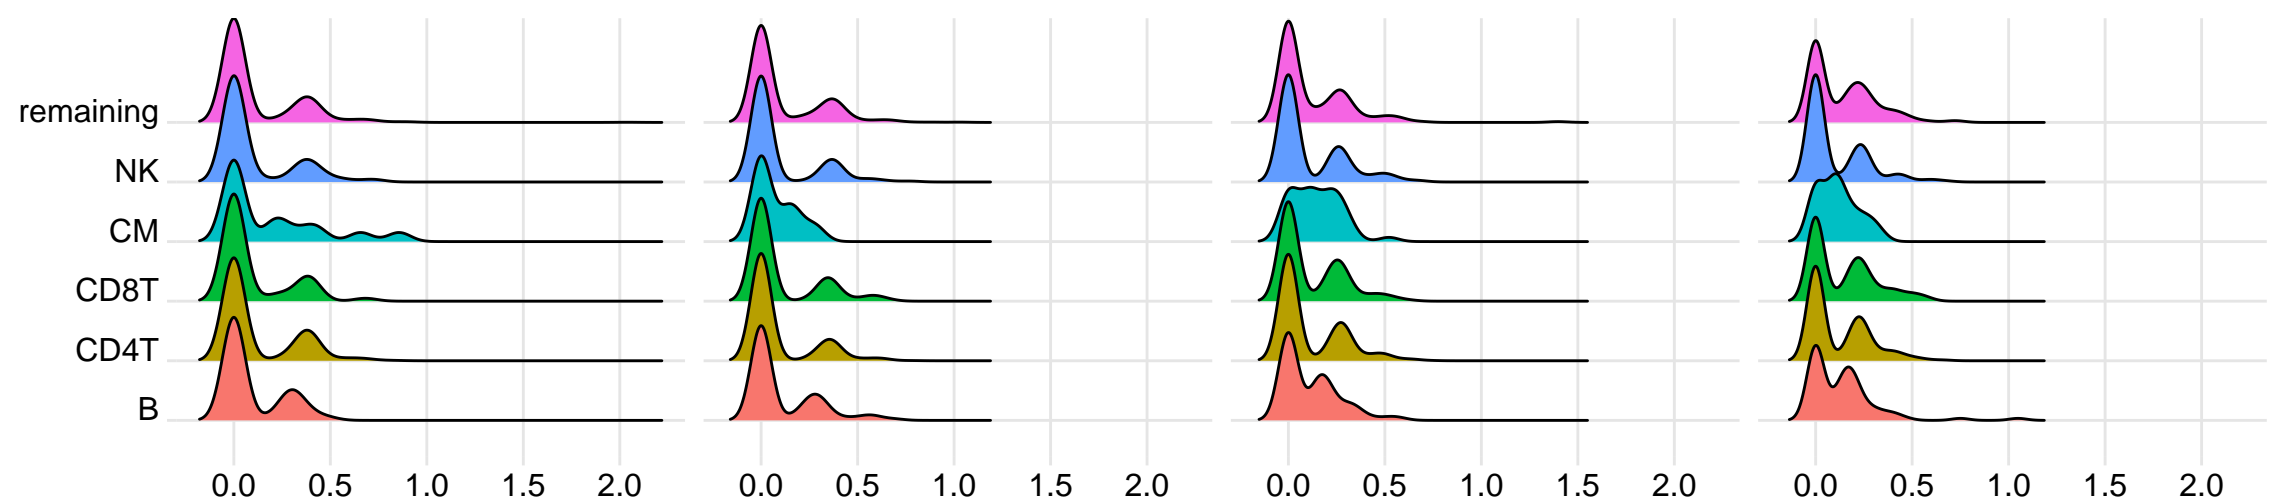

**CD309**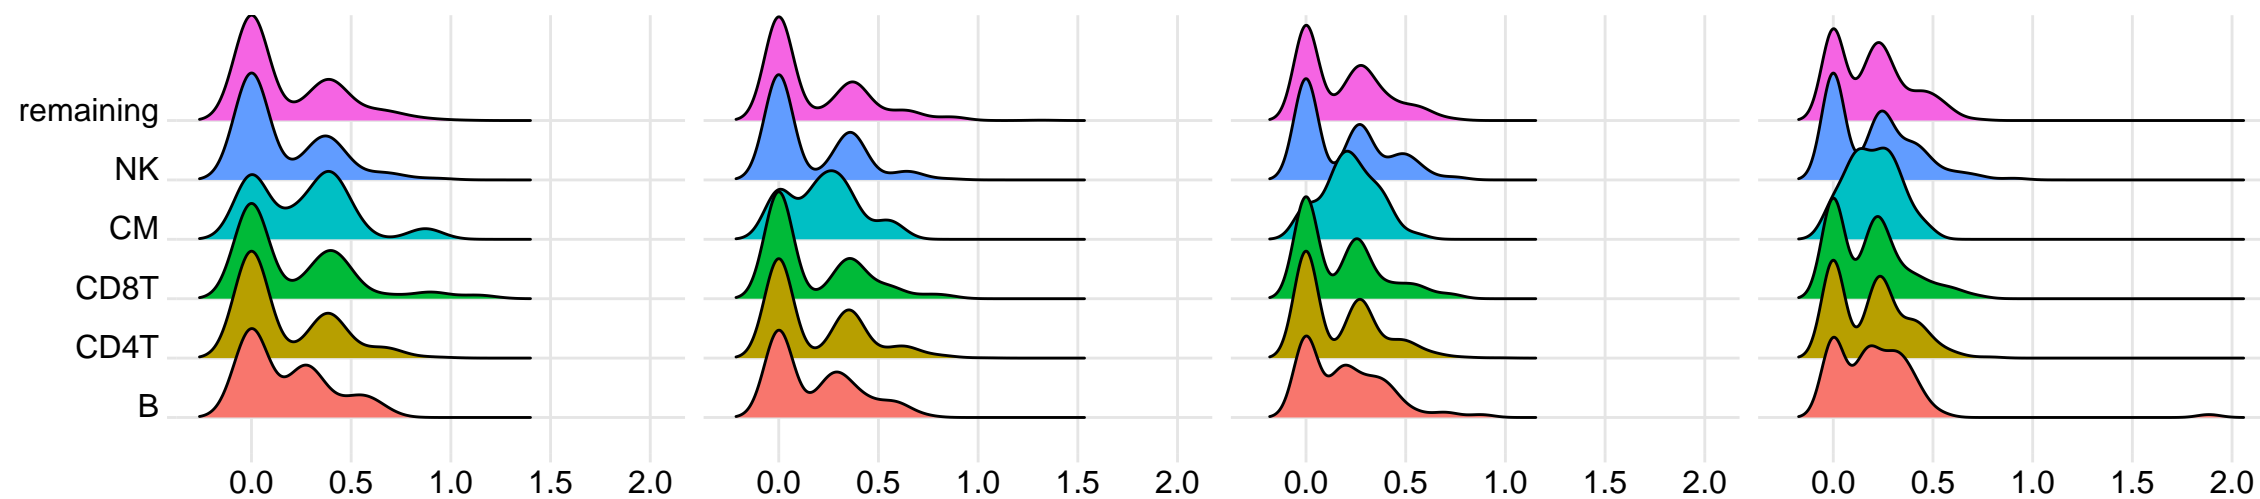**CD324**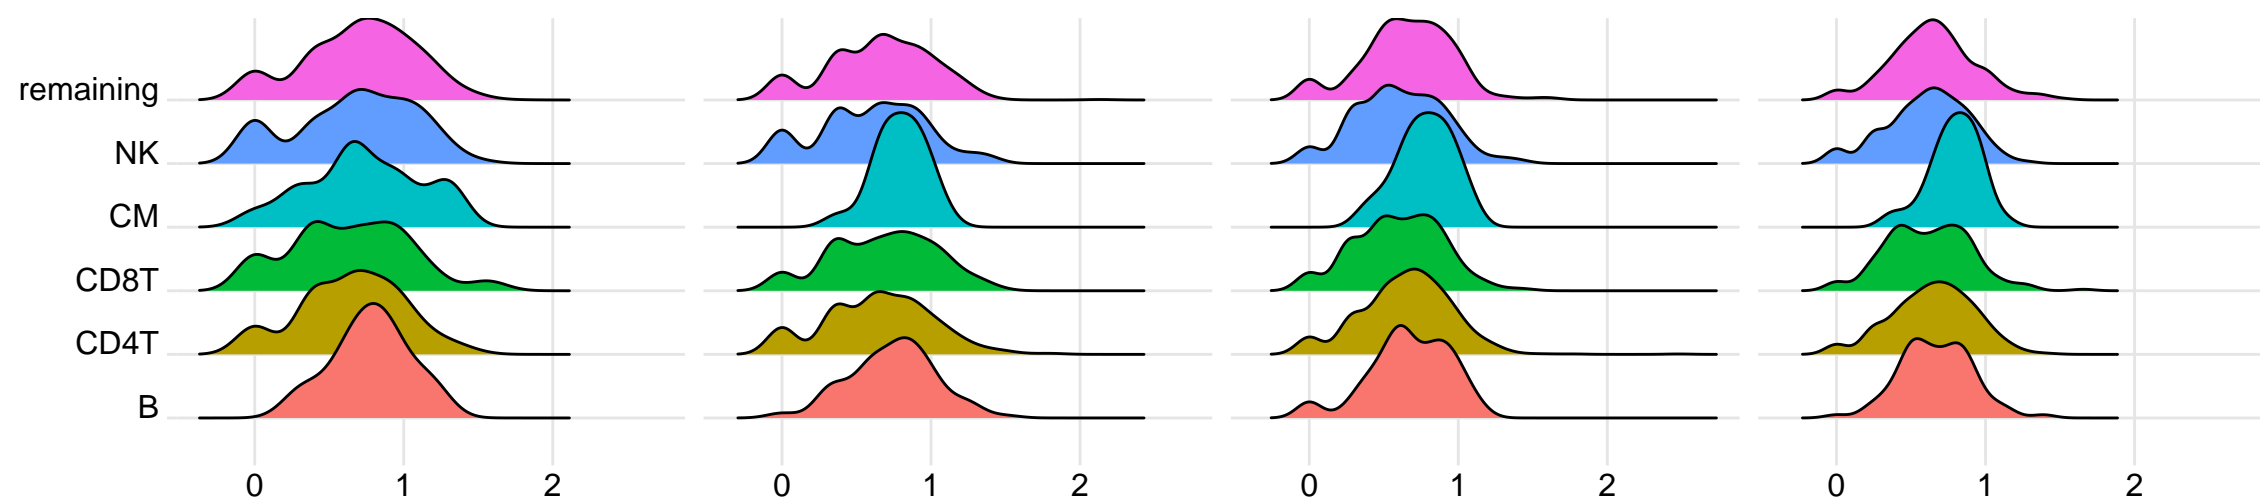**CD326**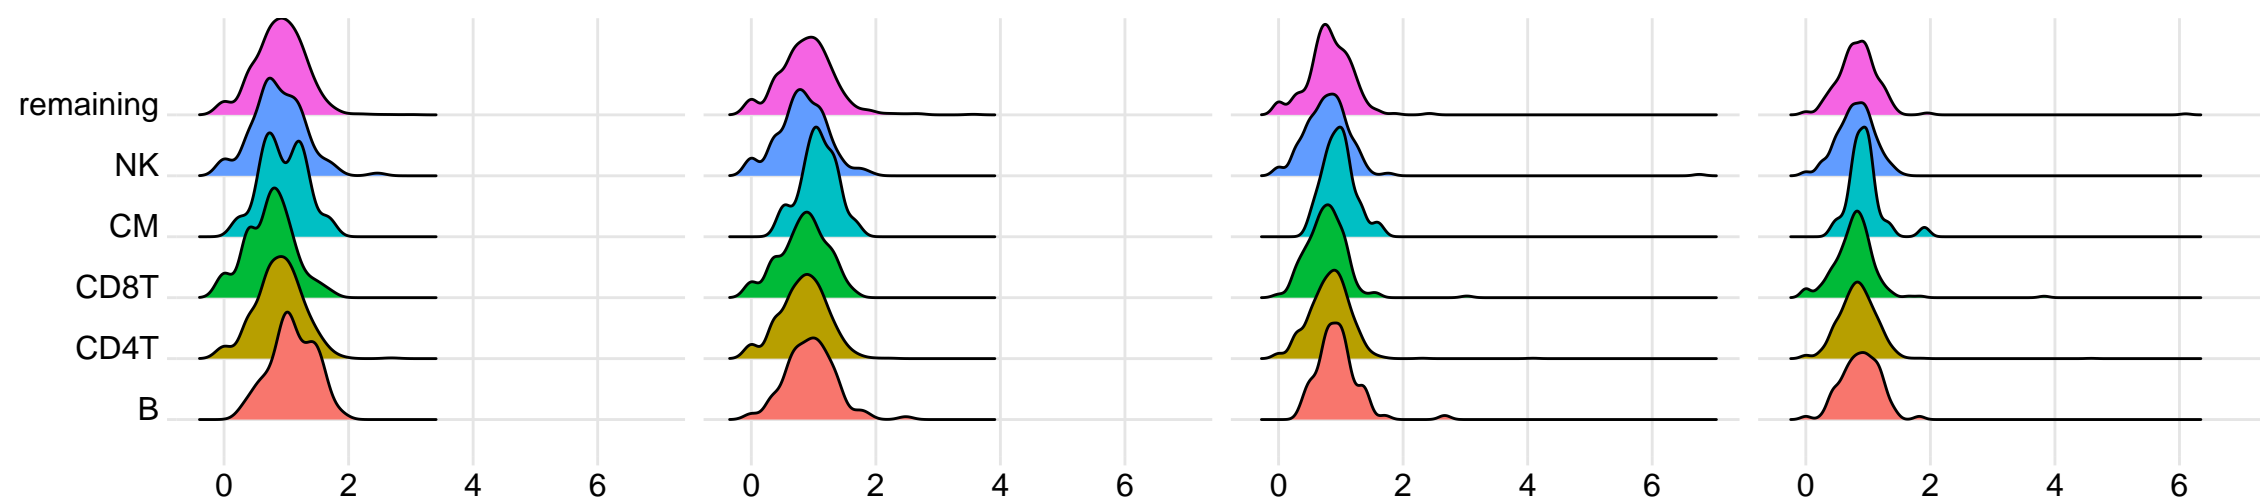**CD336**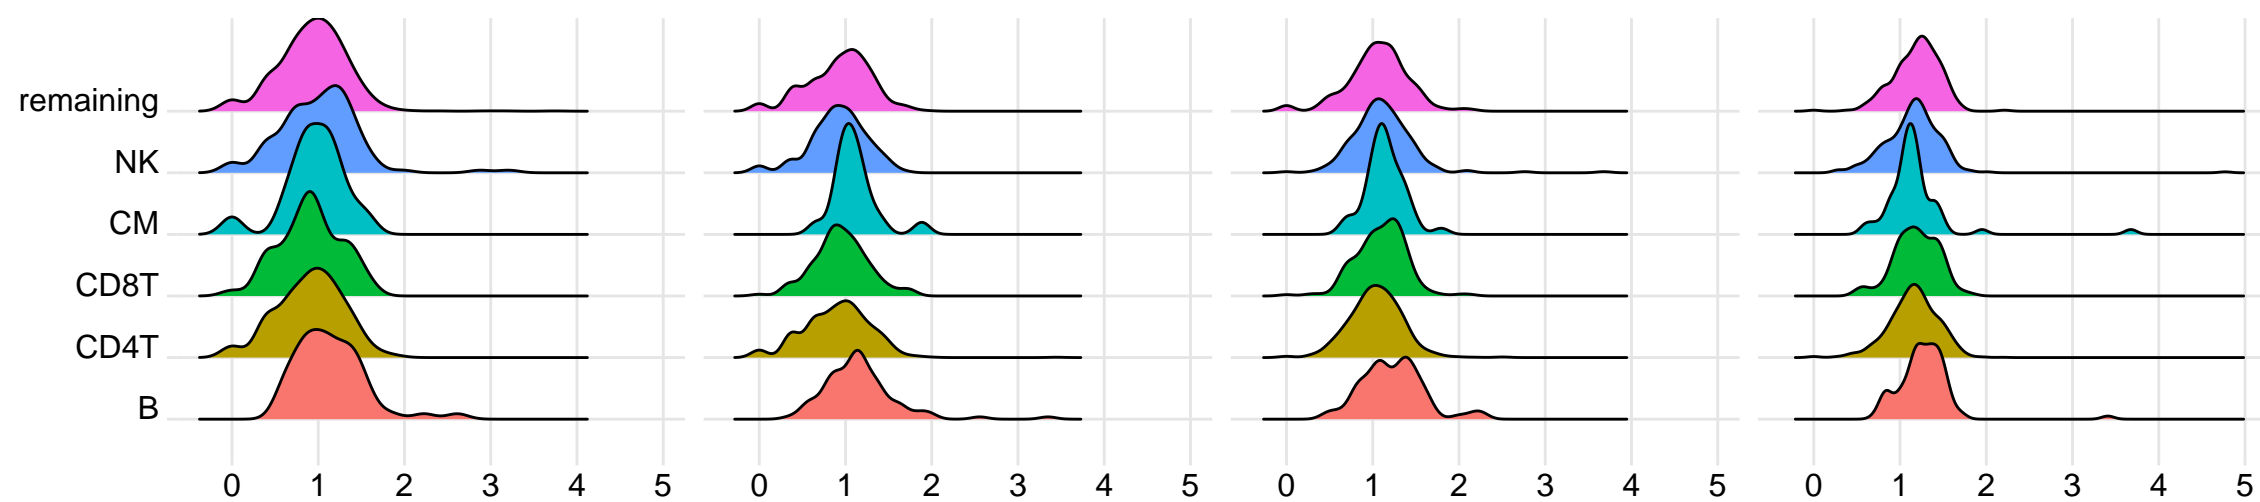**CD34**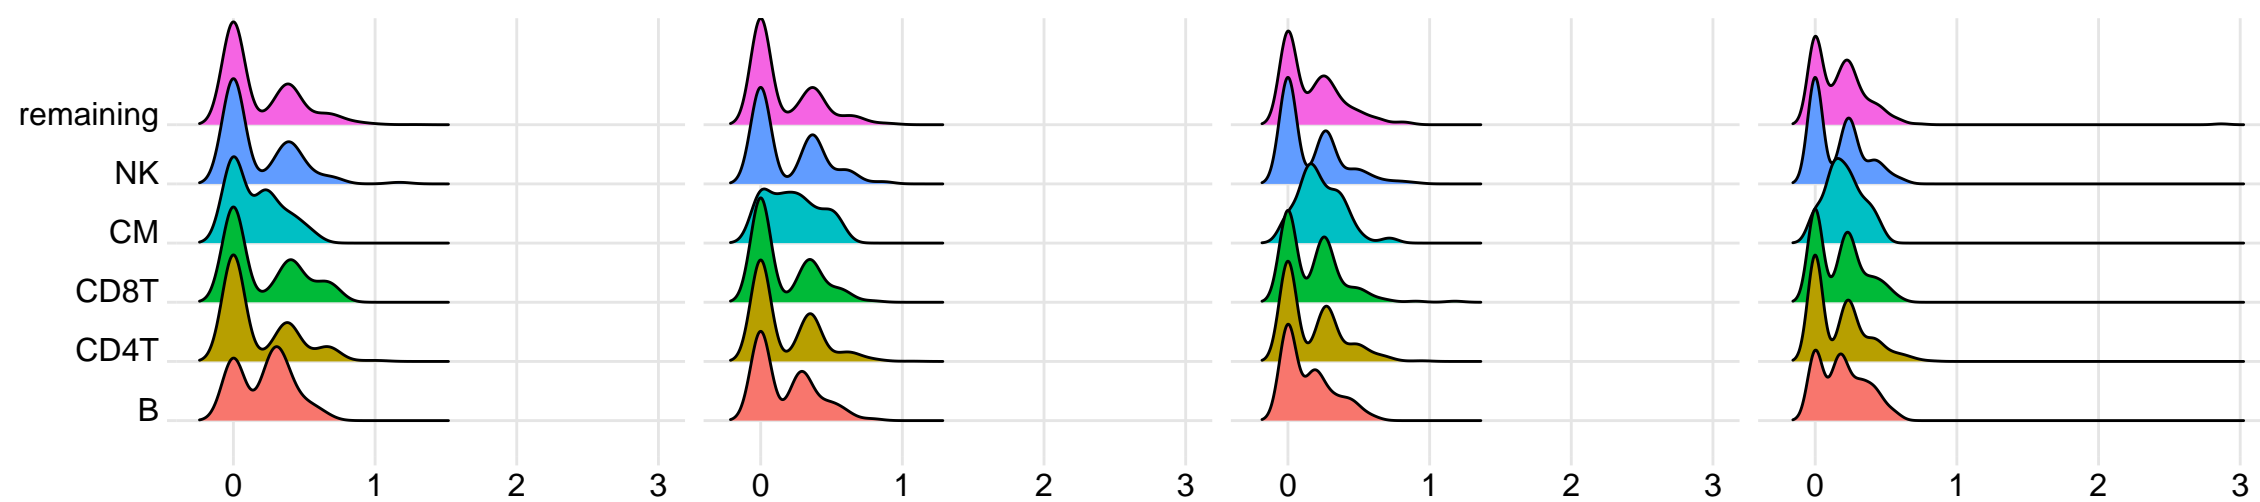



**CD357**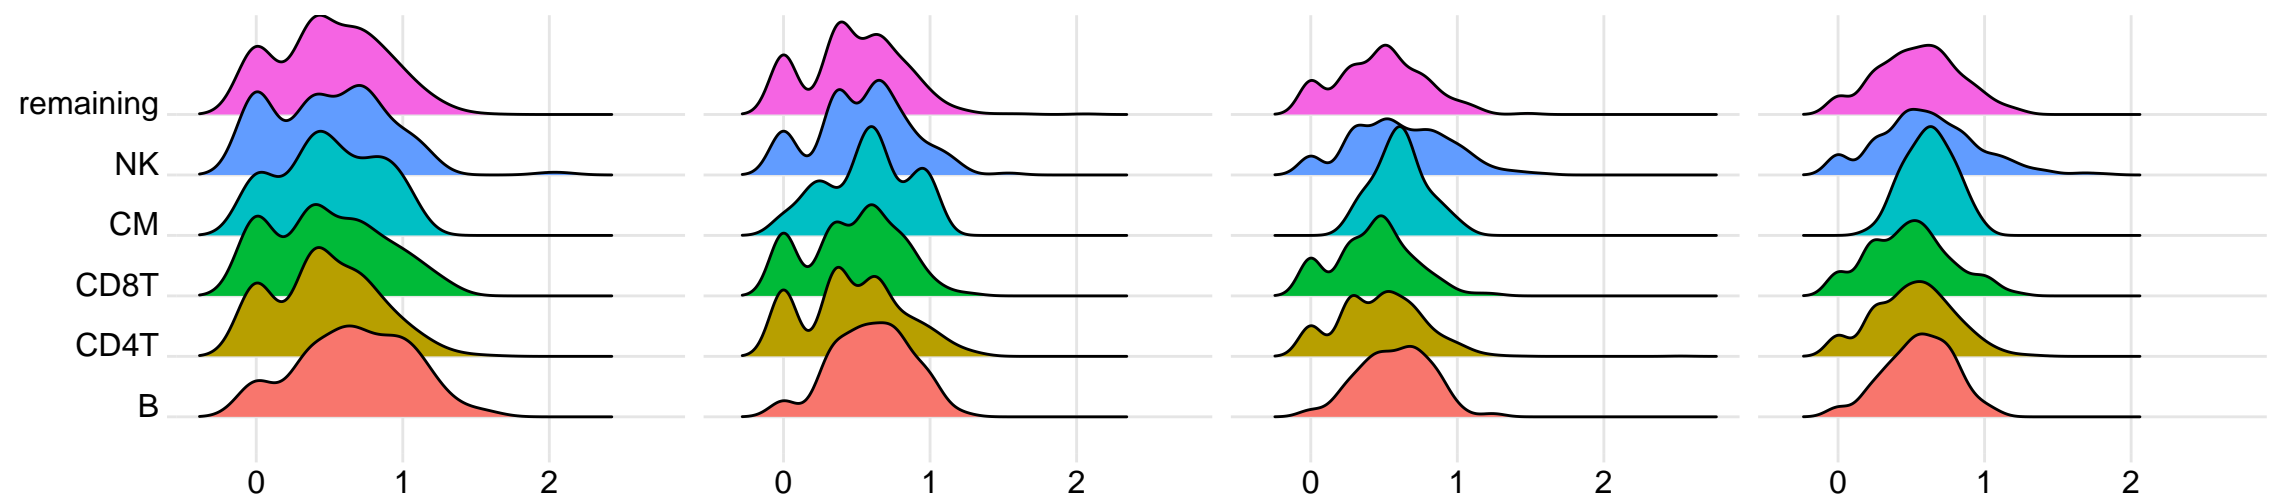**CD370**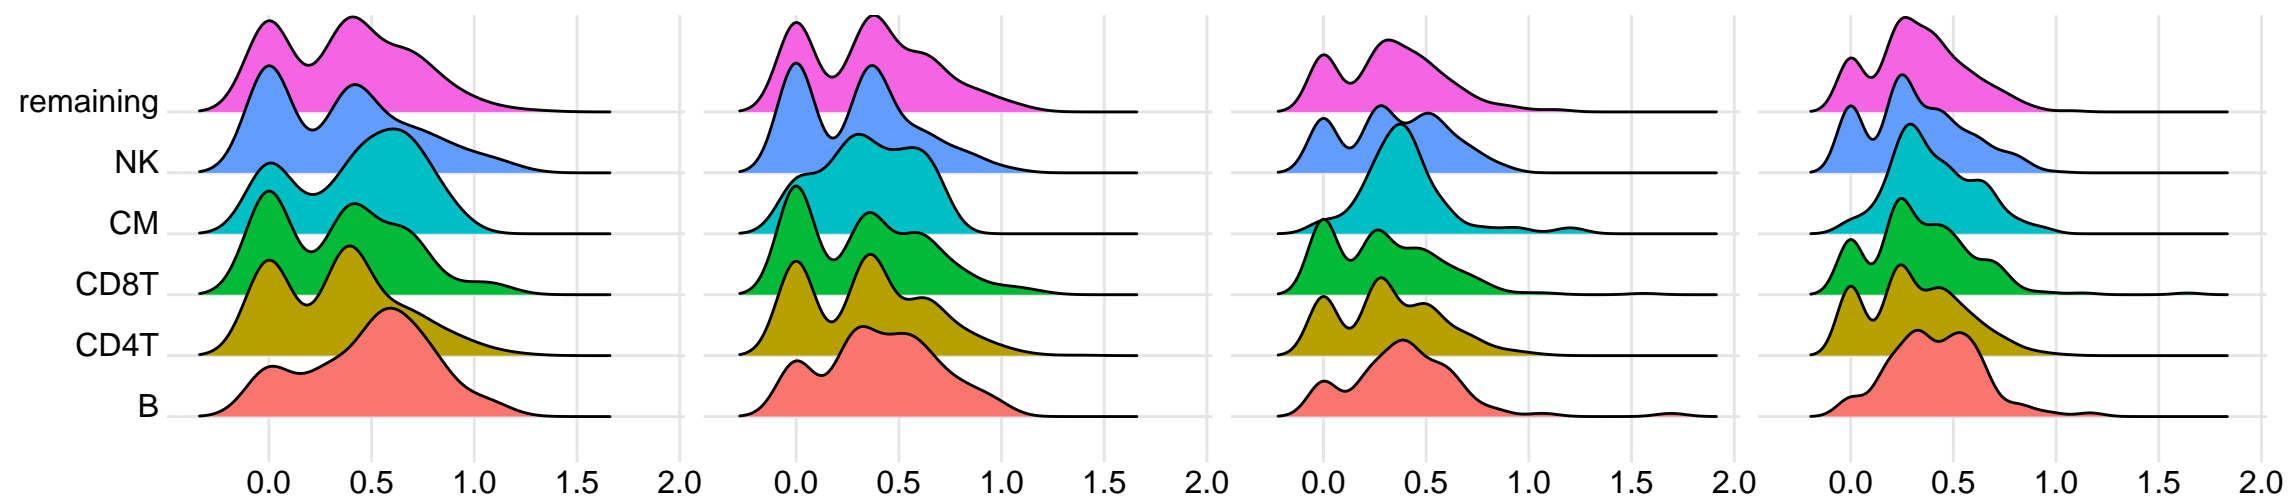**CD71**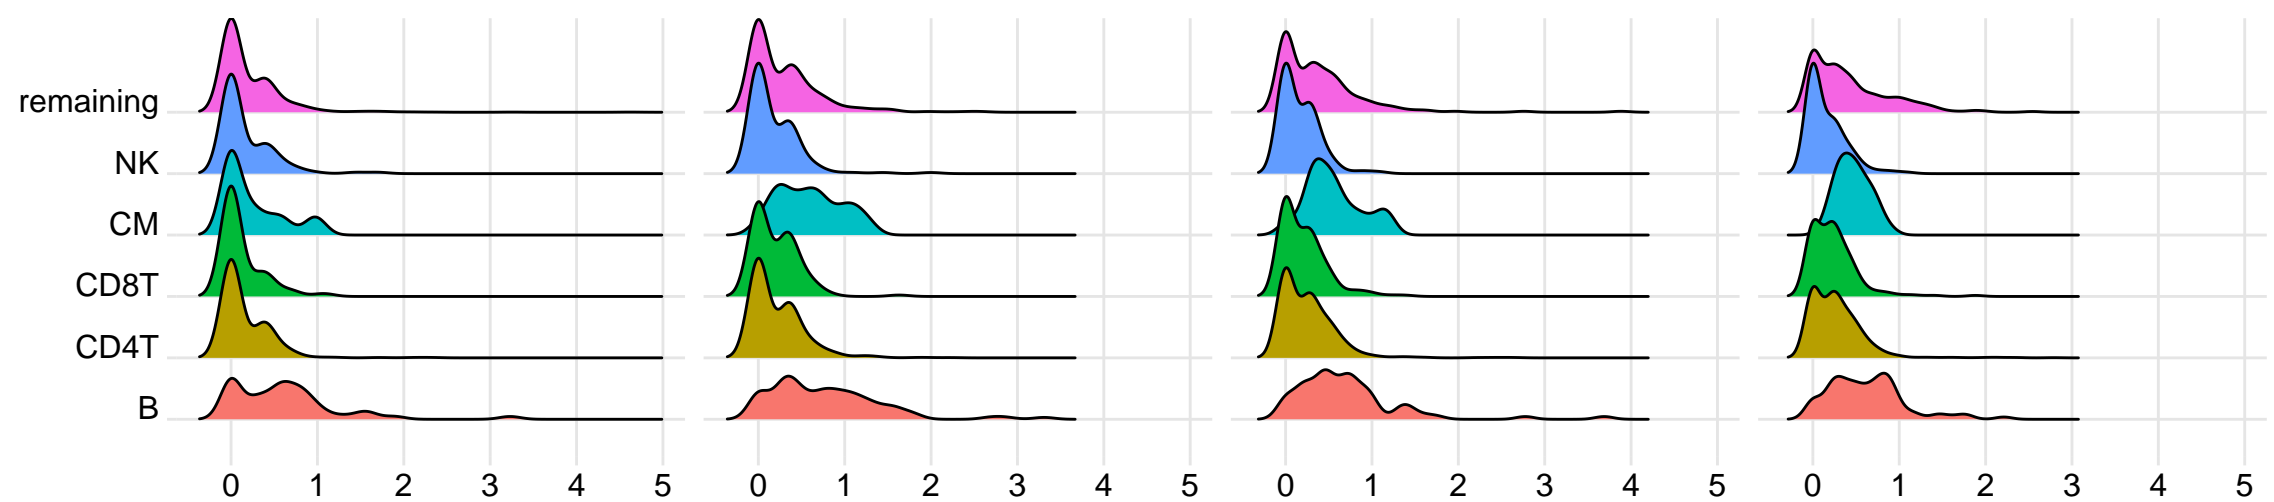**CD80**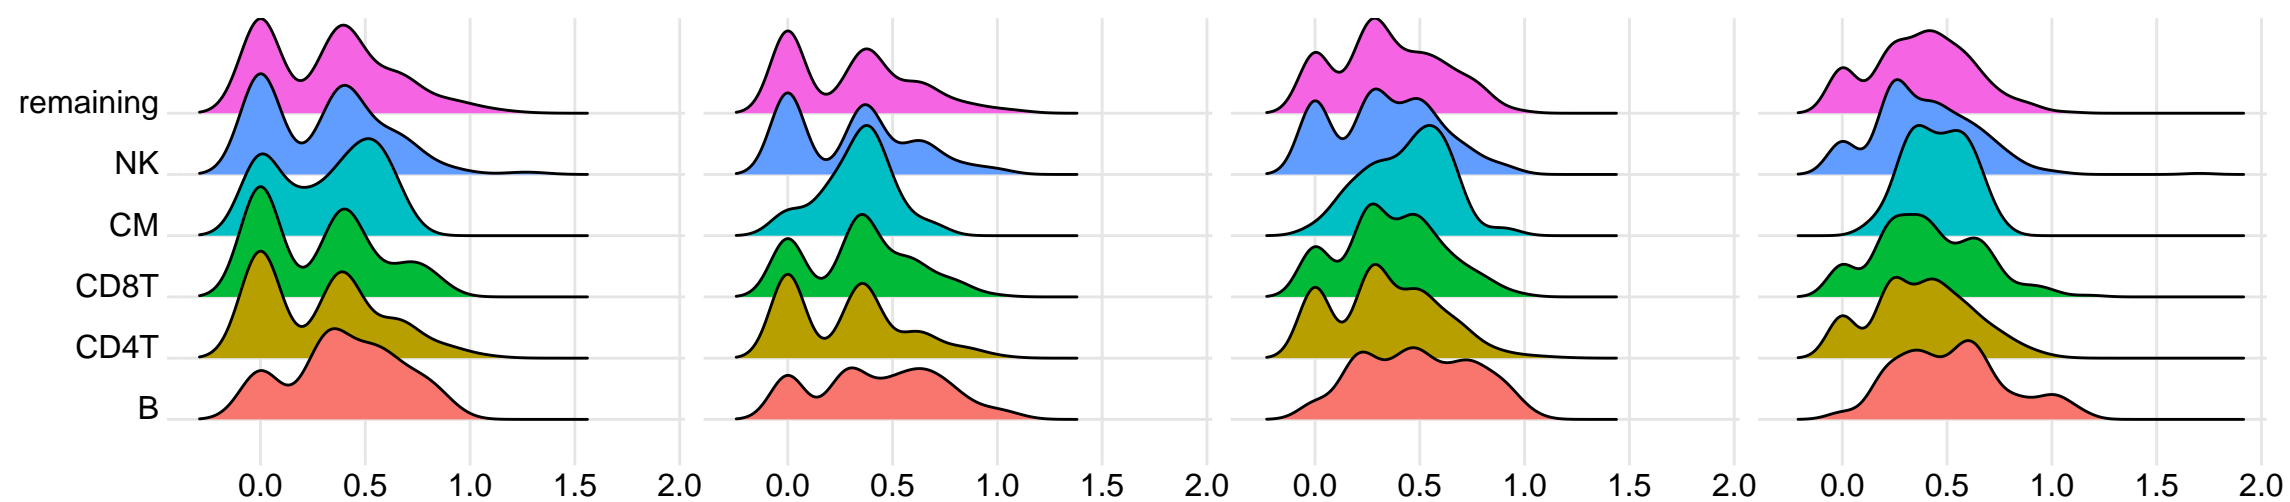**CD83**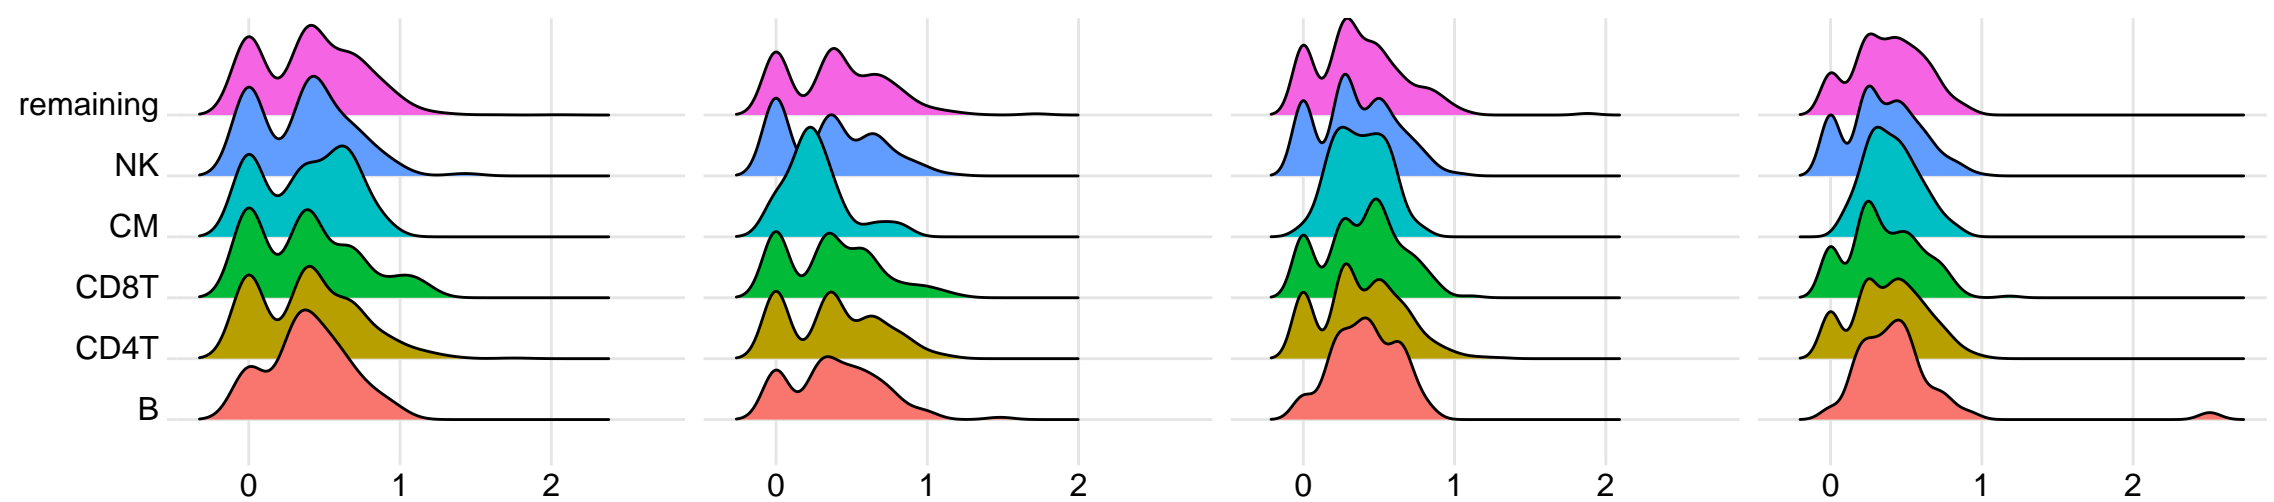

**CD90**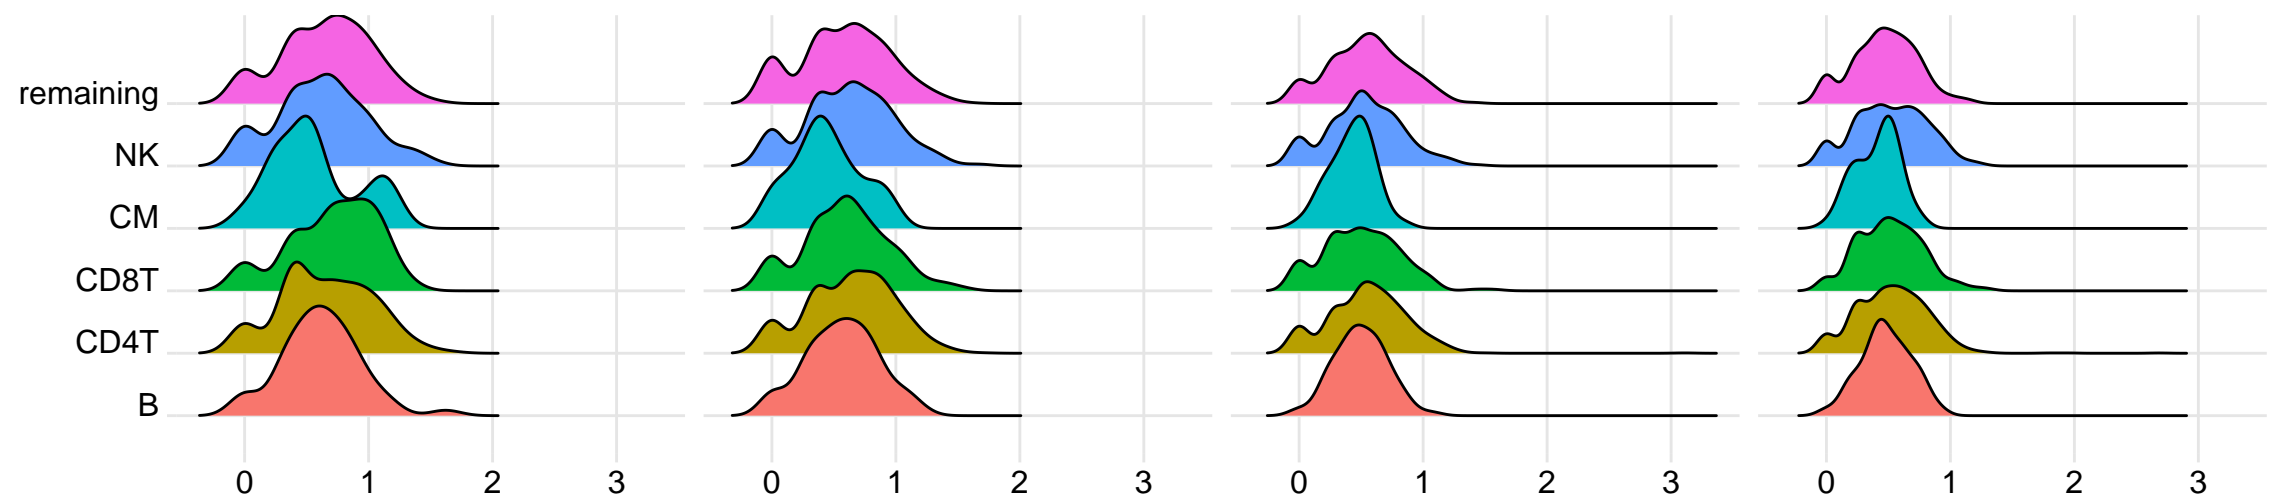**DR3**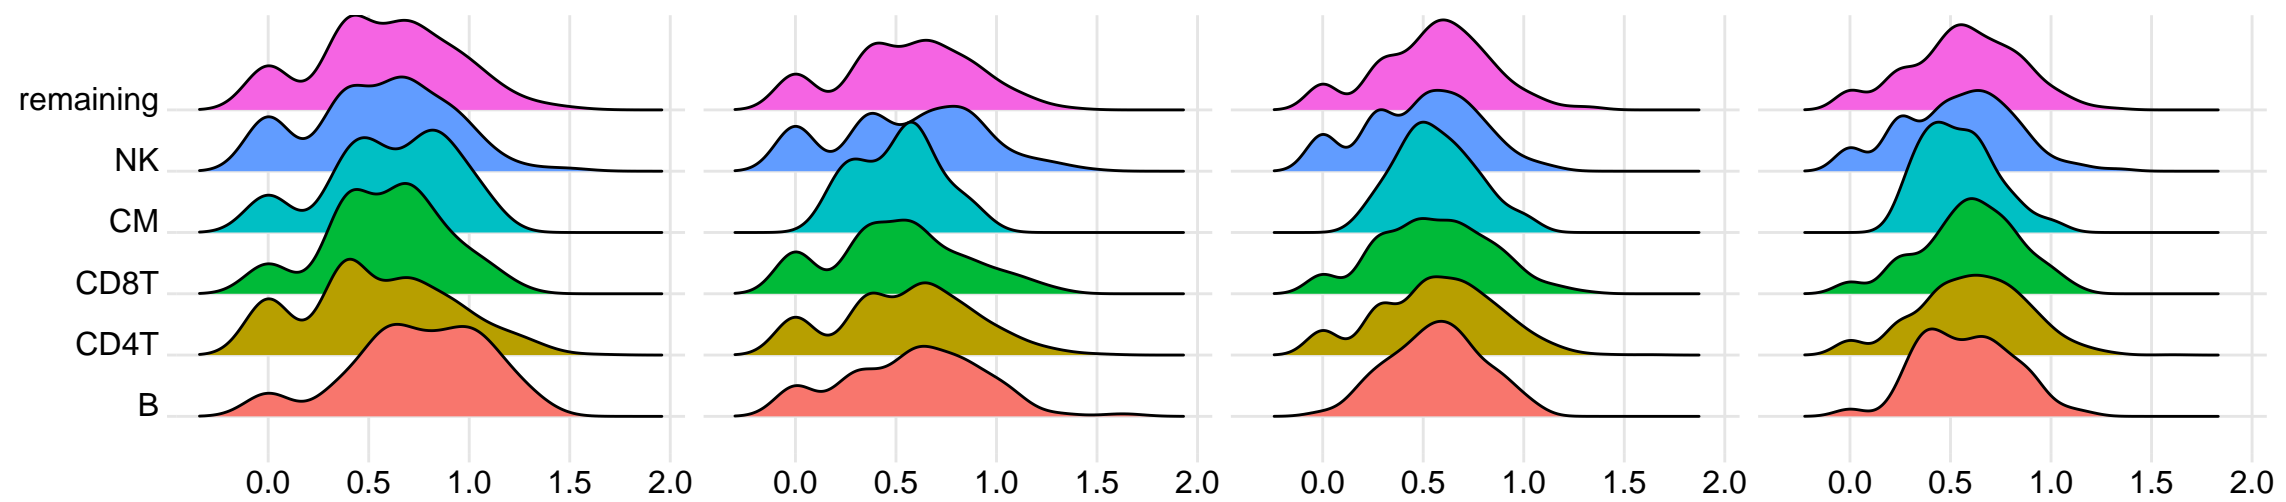**FceR1a**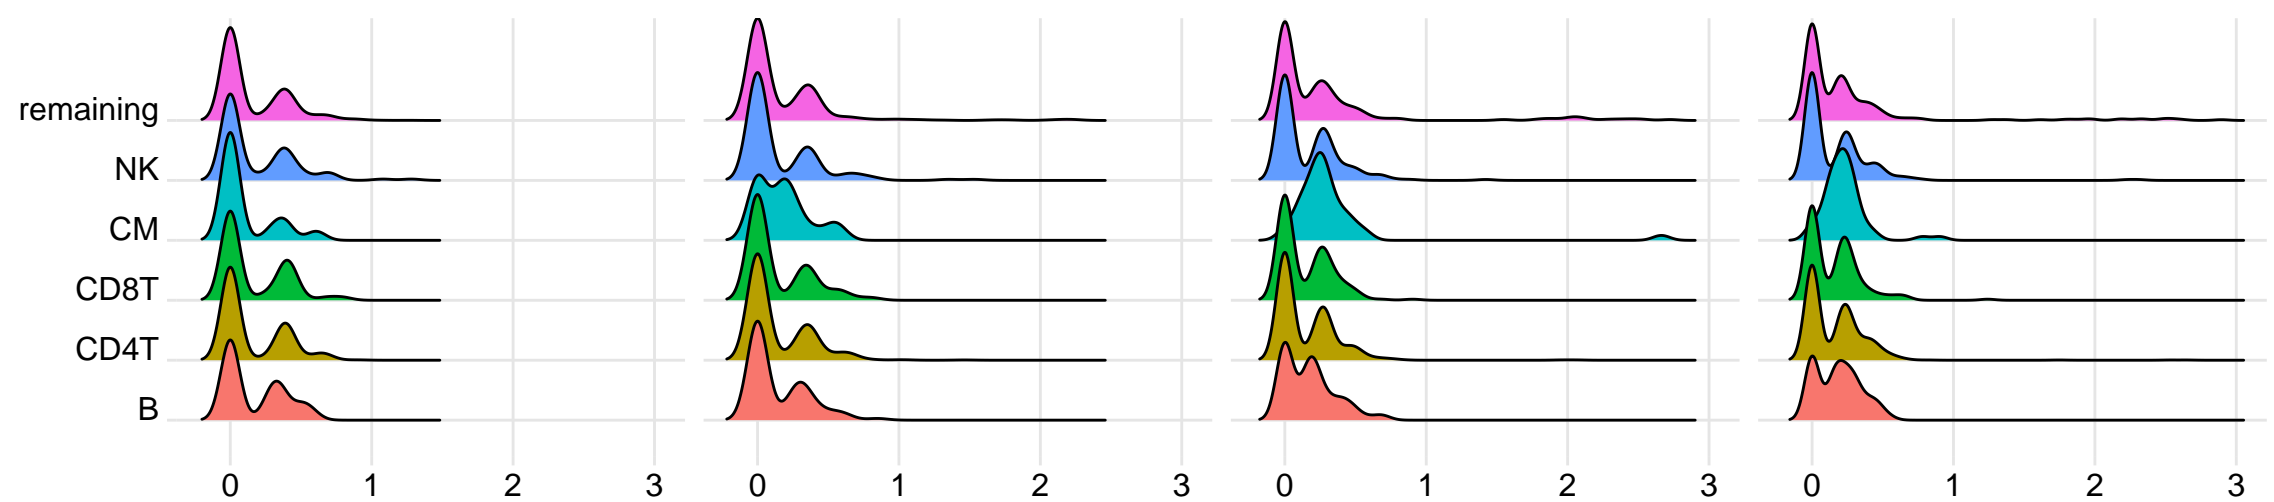**HLA.A.B.C**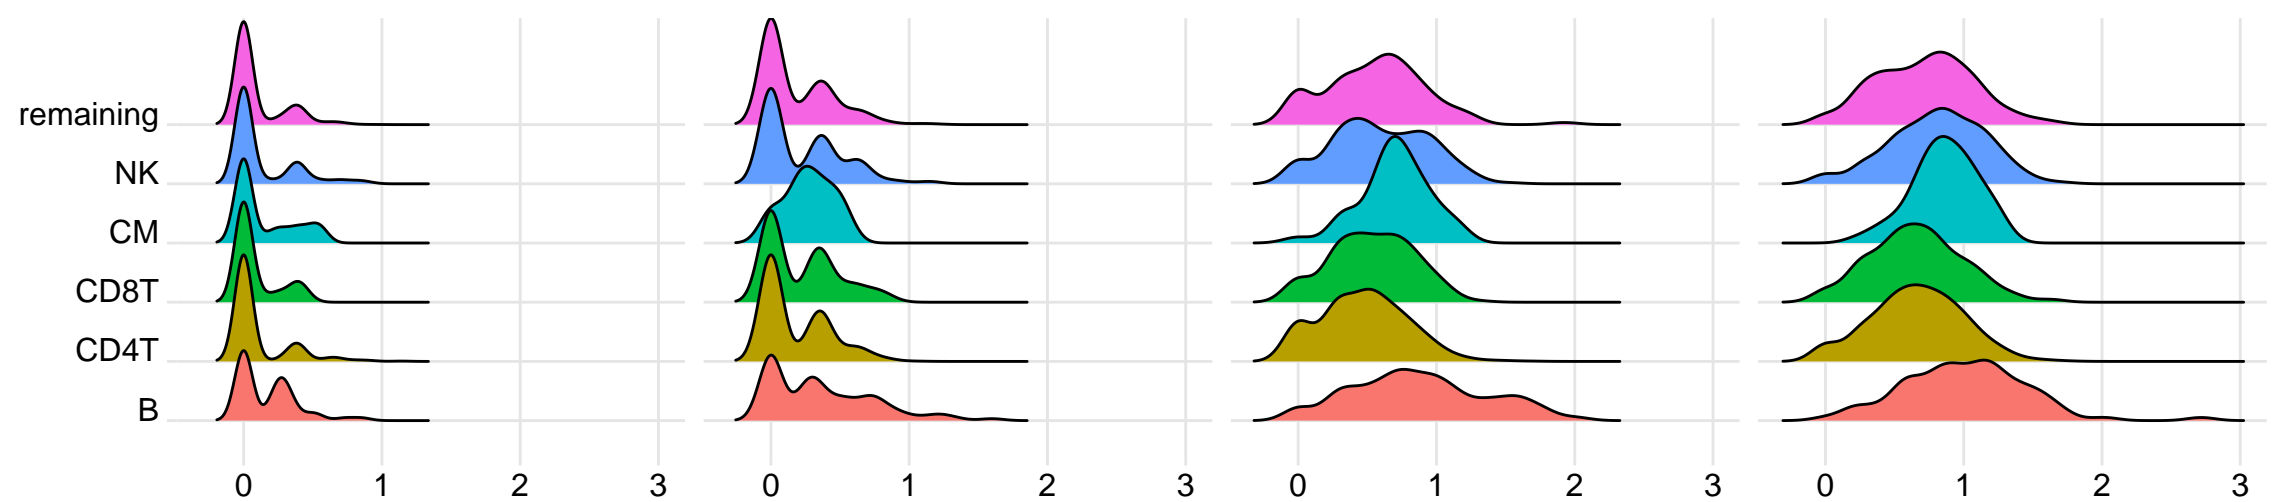**HLA.A2**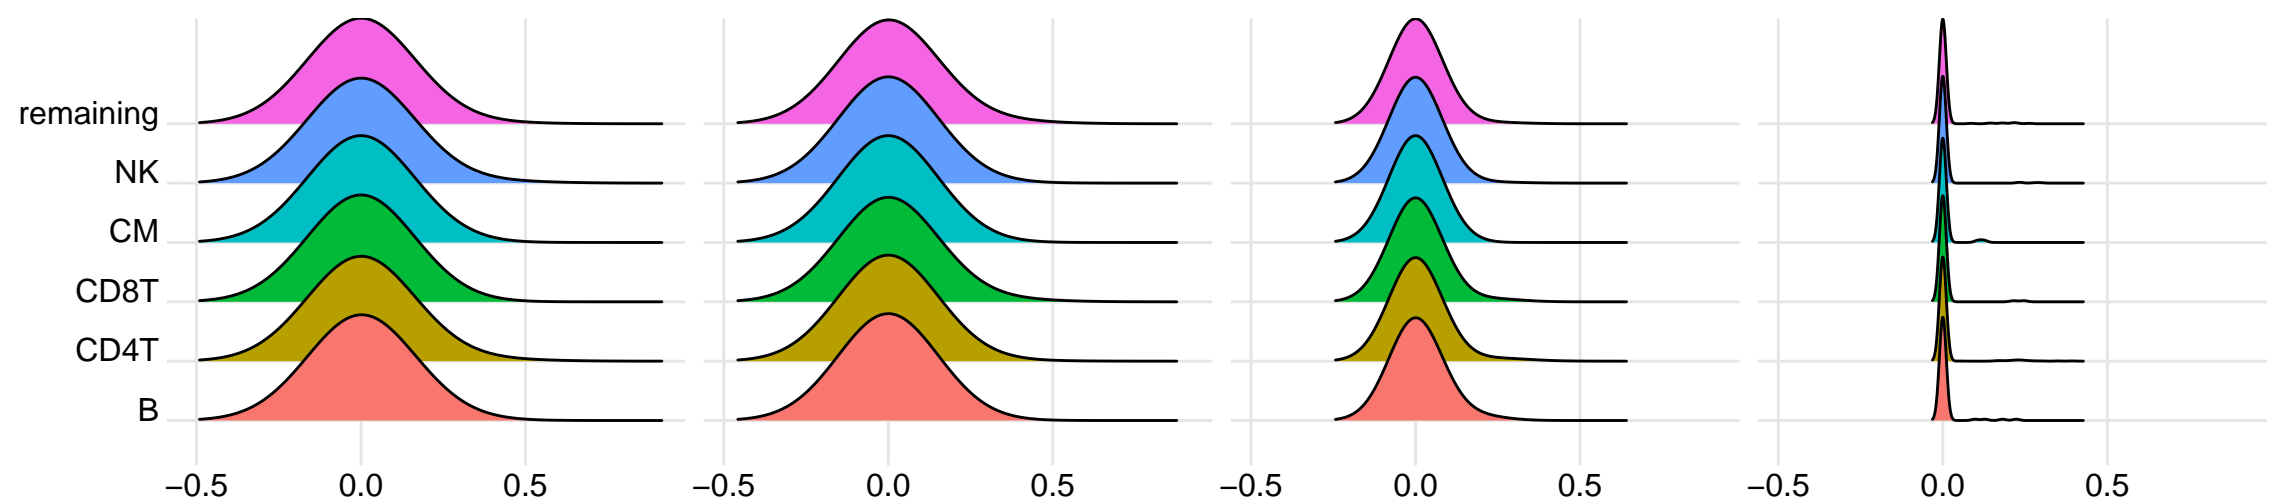

### HLA.F.1

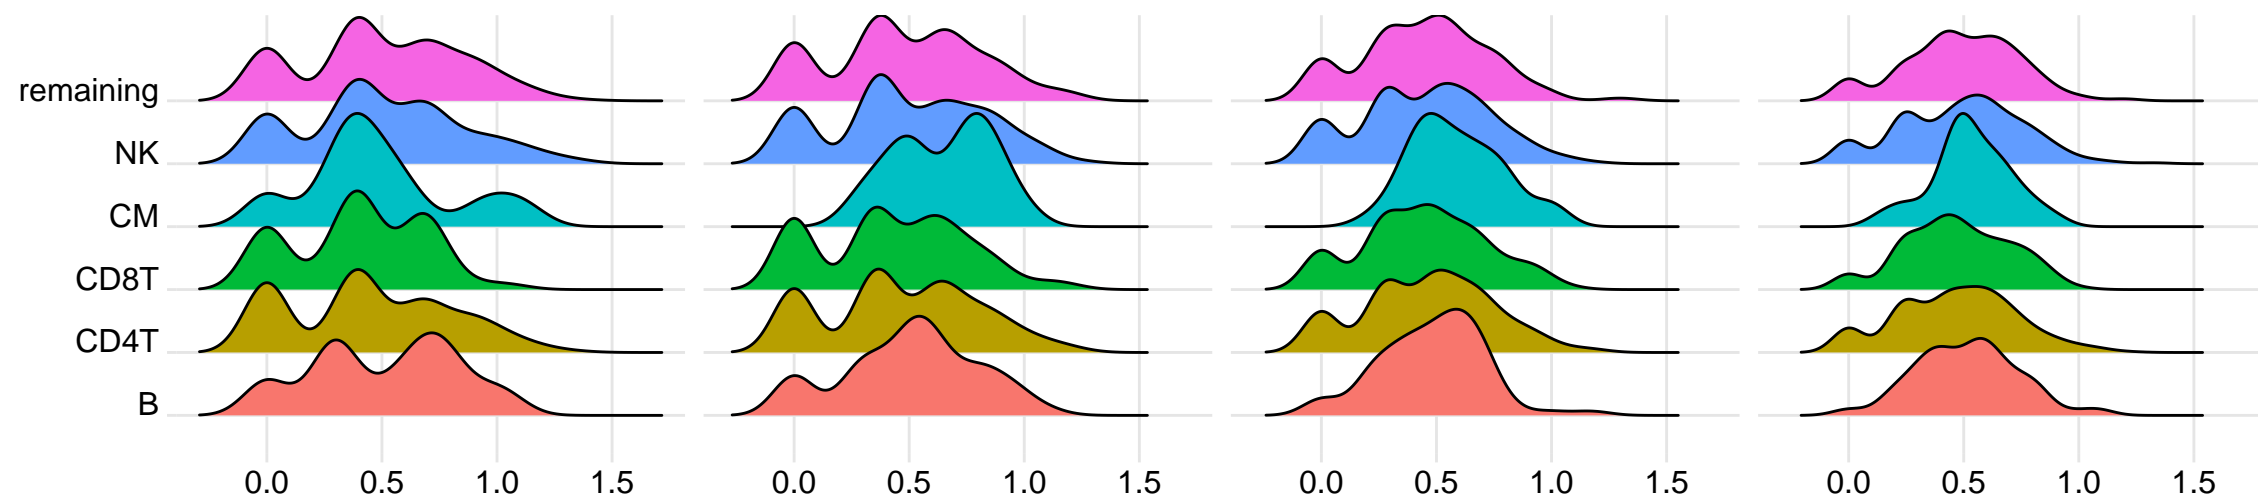

### LOX

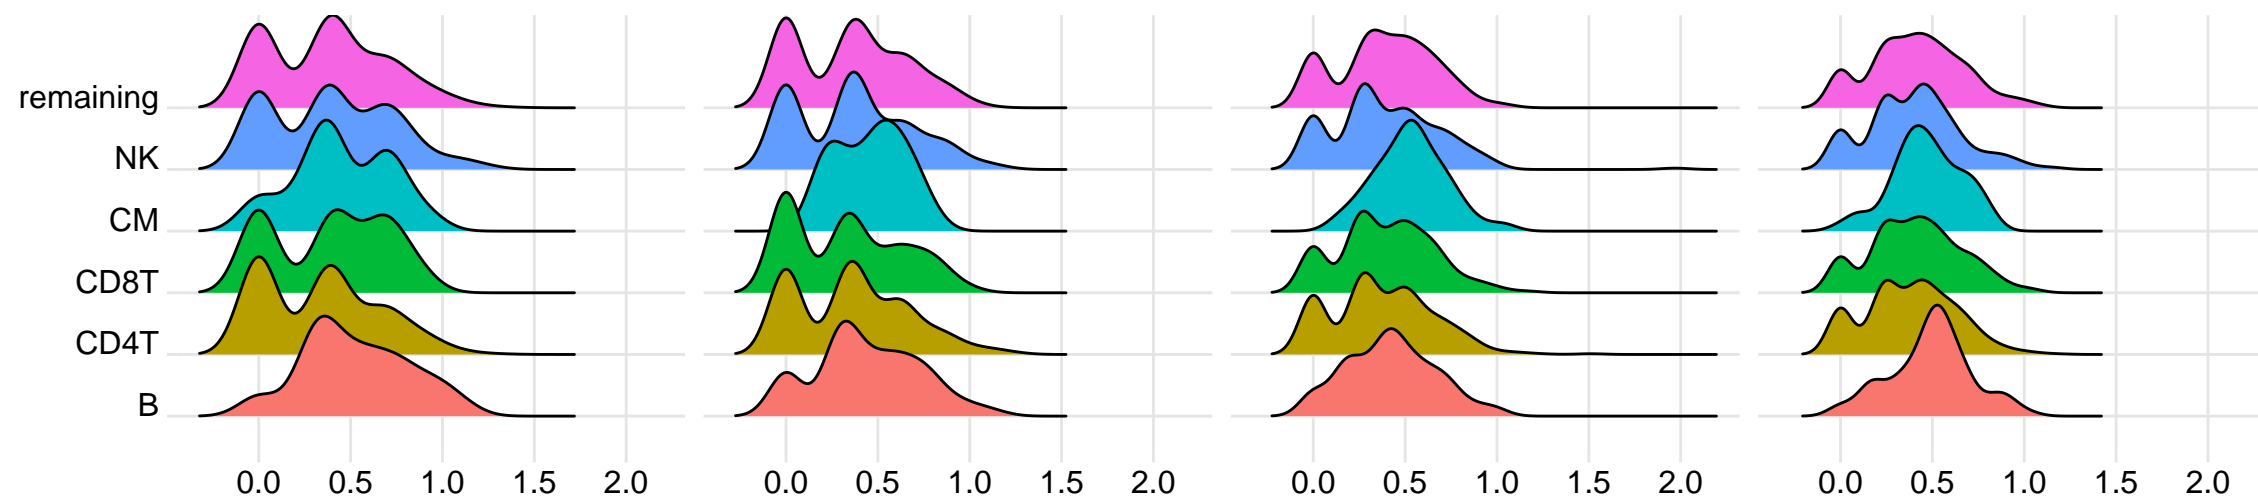

### Mac.2

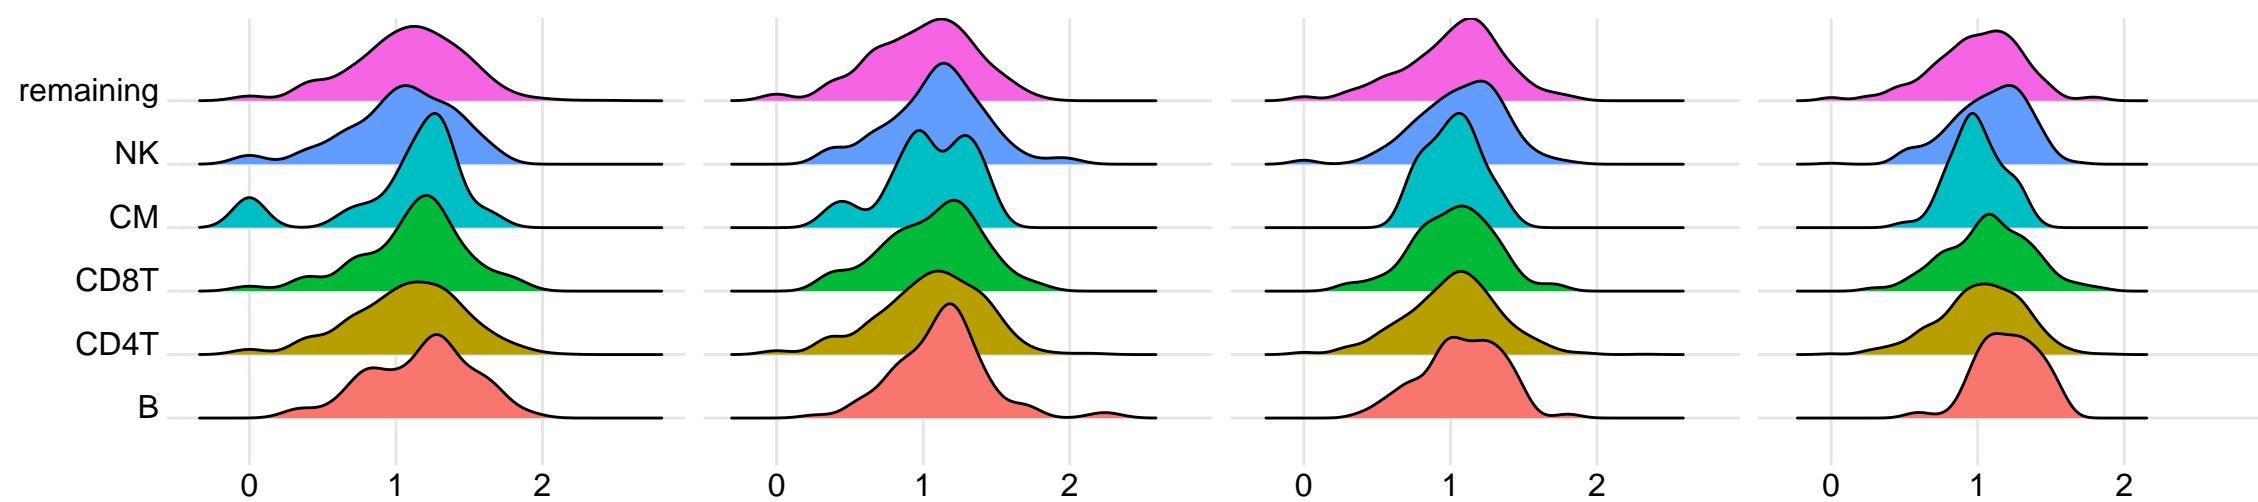

### NLRP2.1

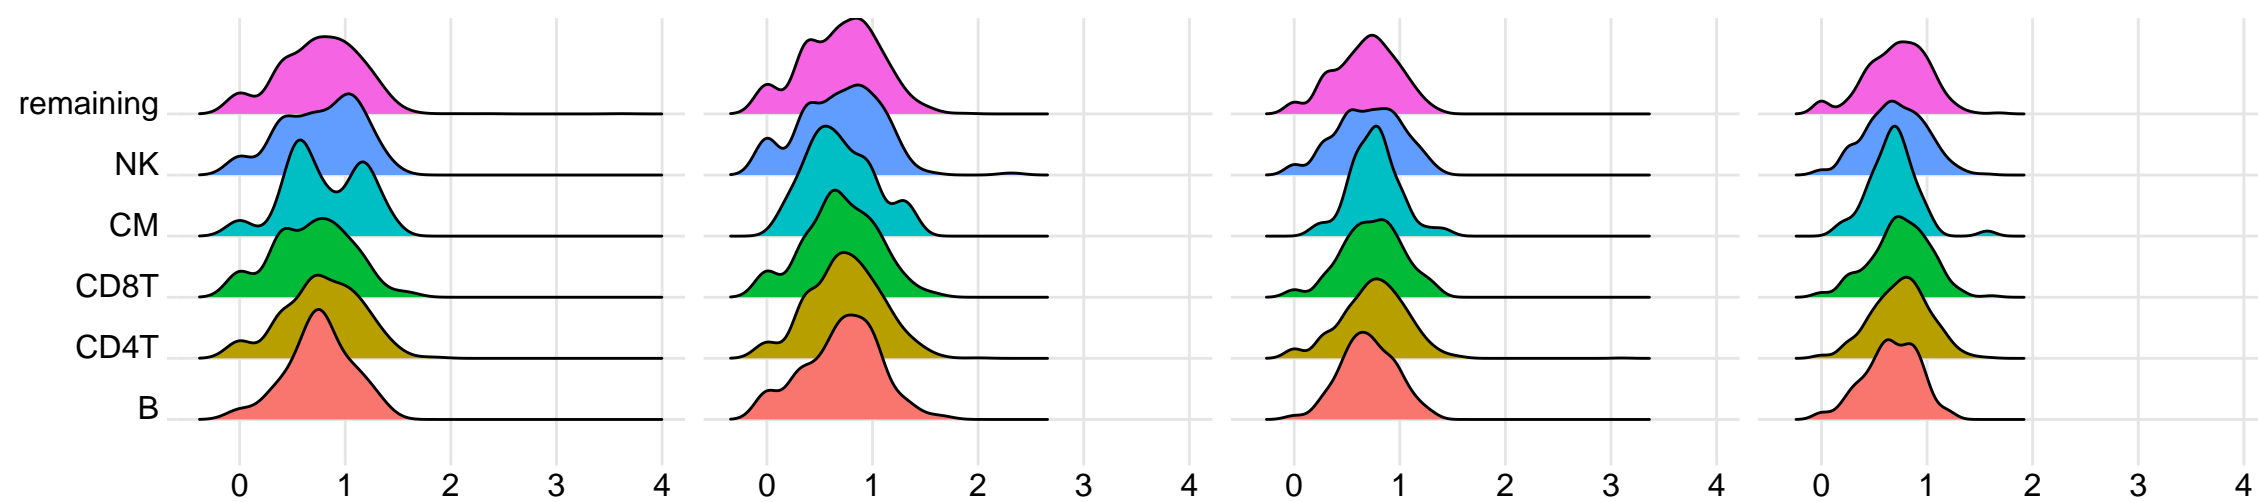

### Podocalyxin

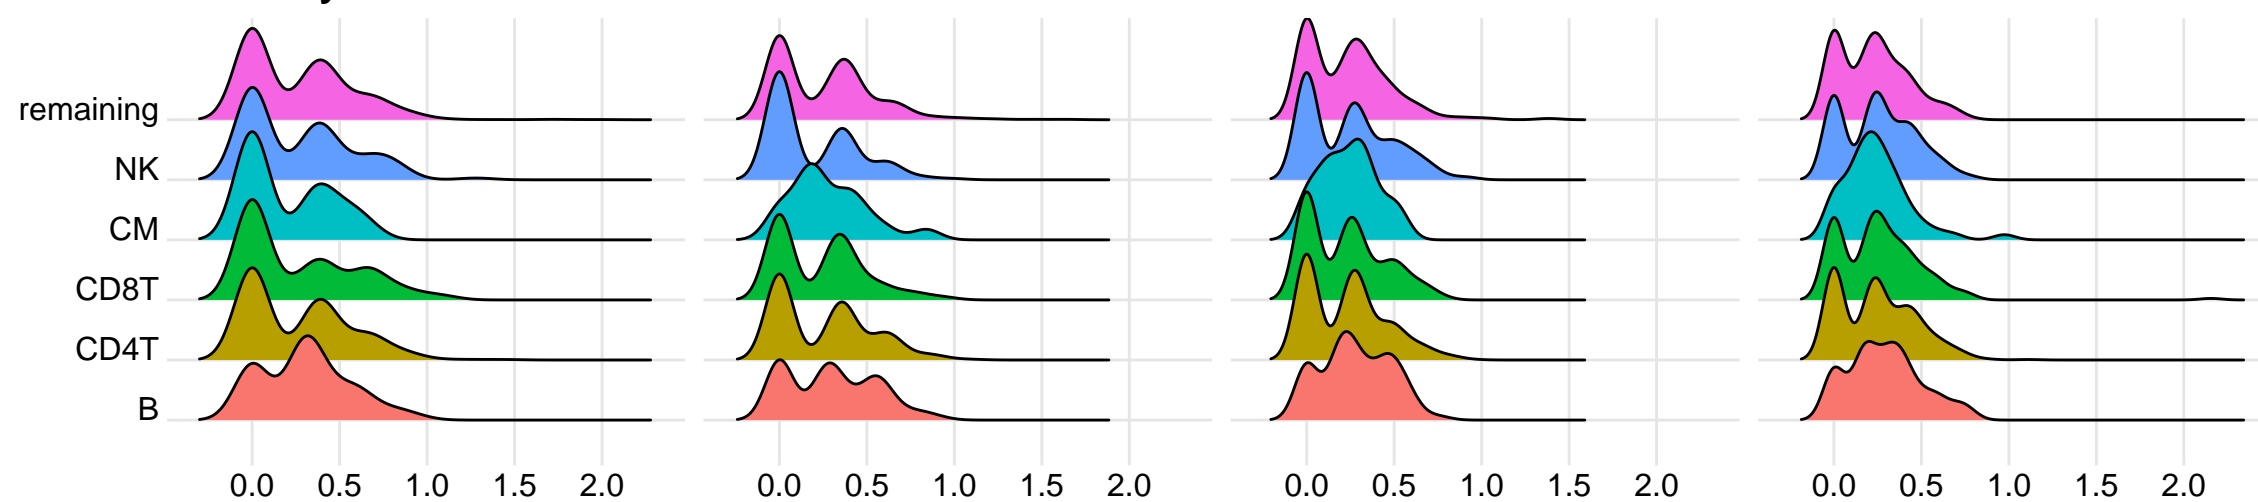

### Podoplanin

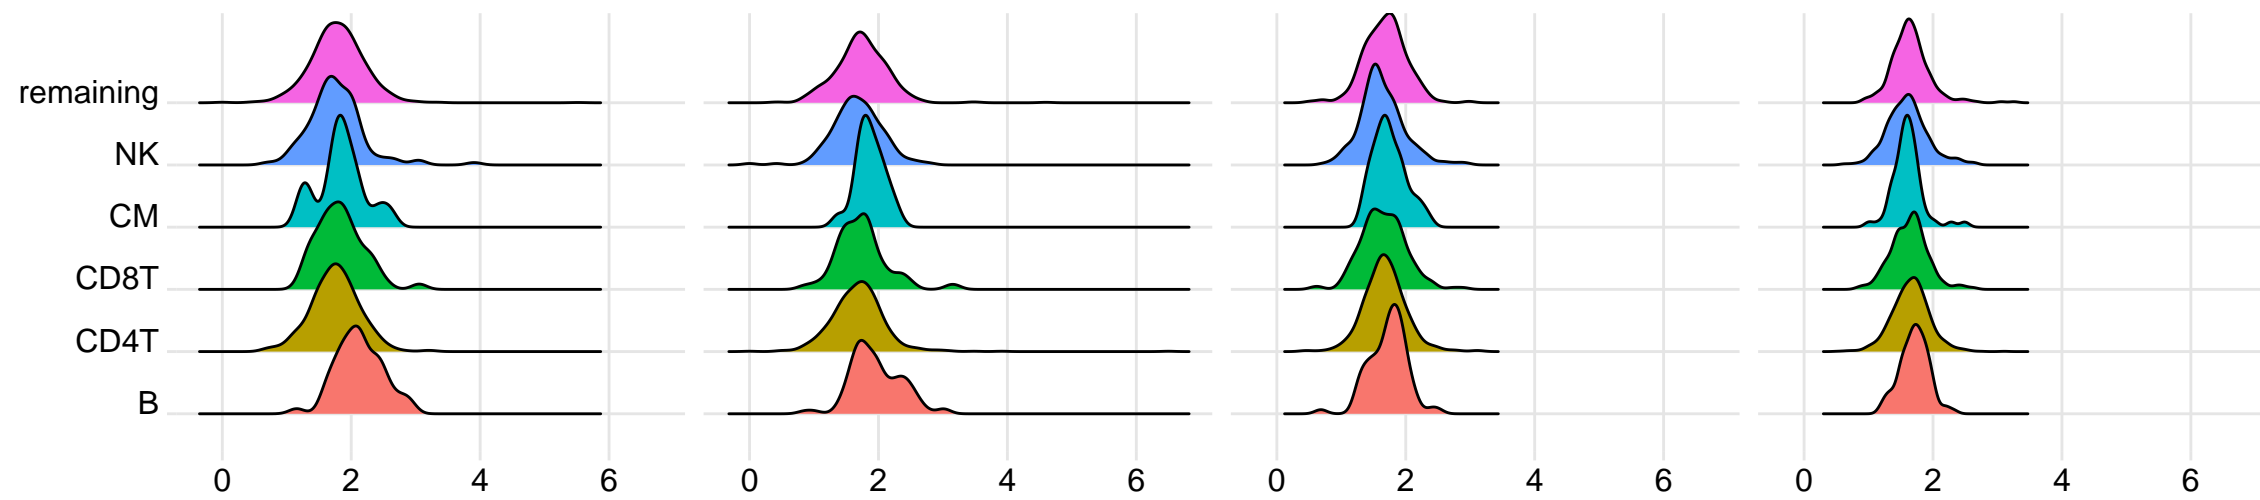

### TCR.Va24.Ja18

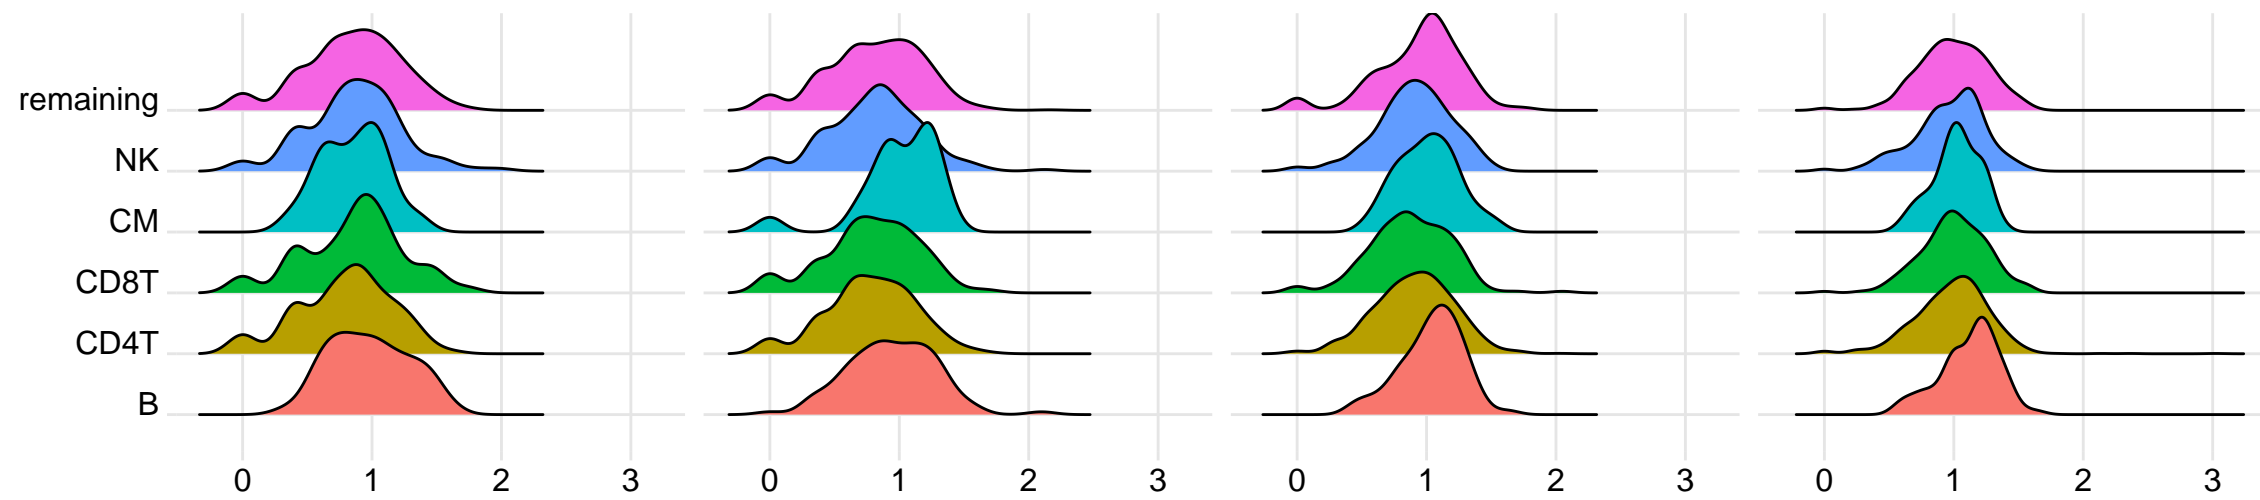

### TCR.Va7.2

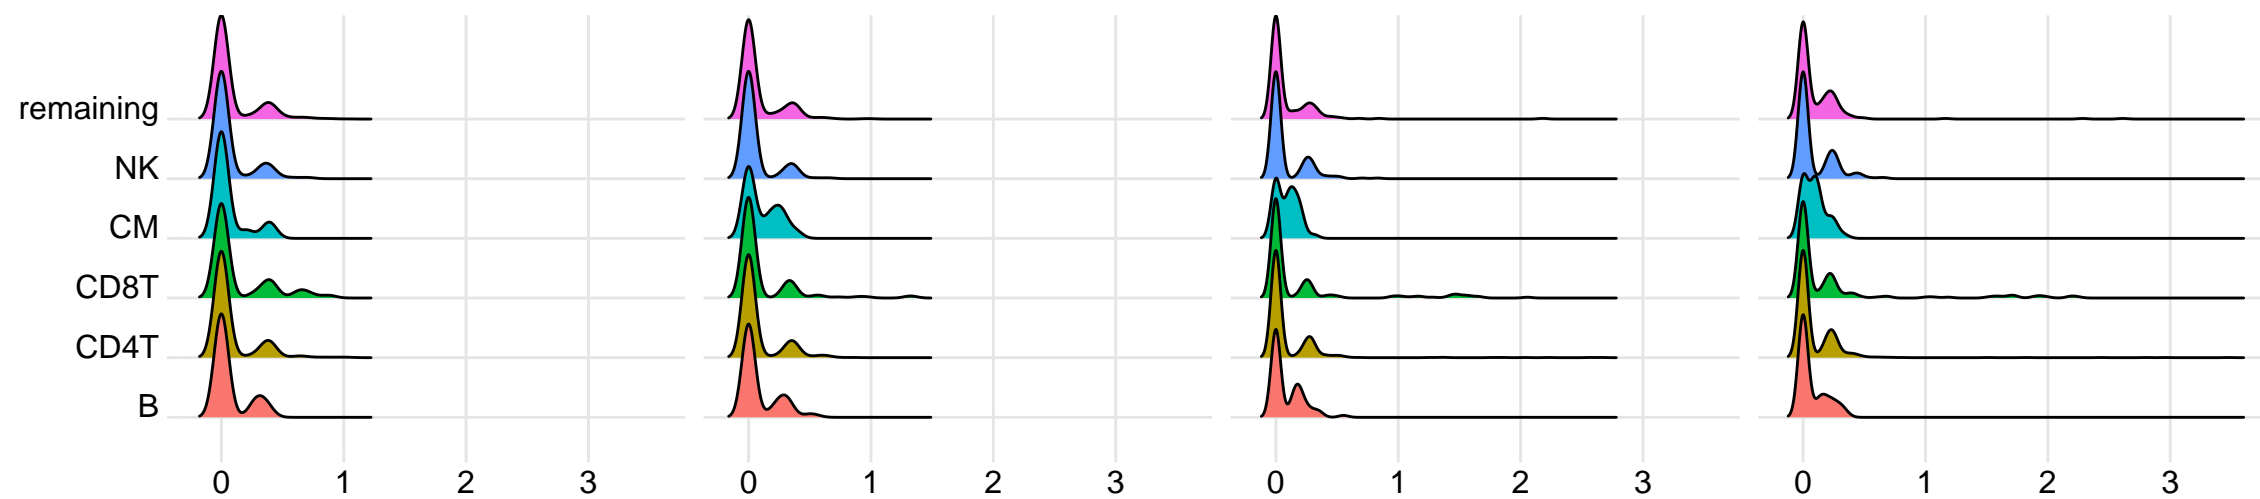

### TCR.Vb13.1

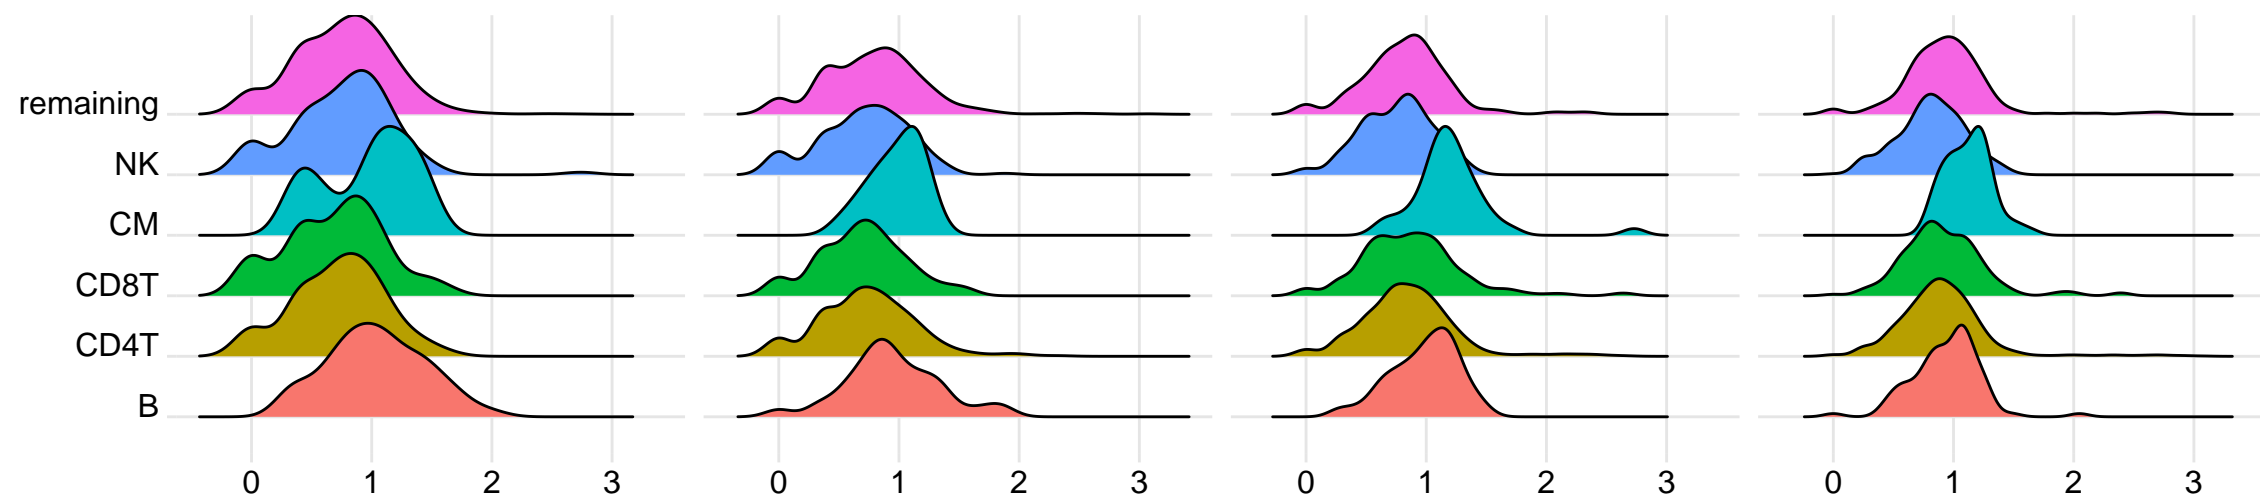

### TCR.Vd2

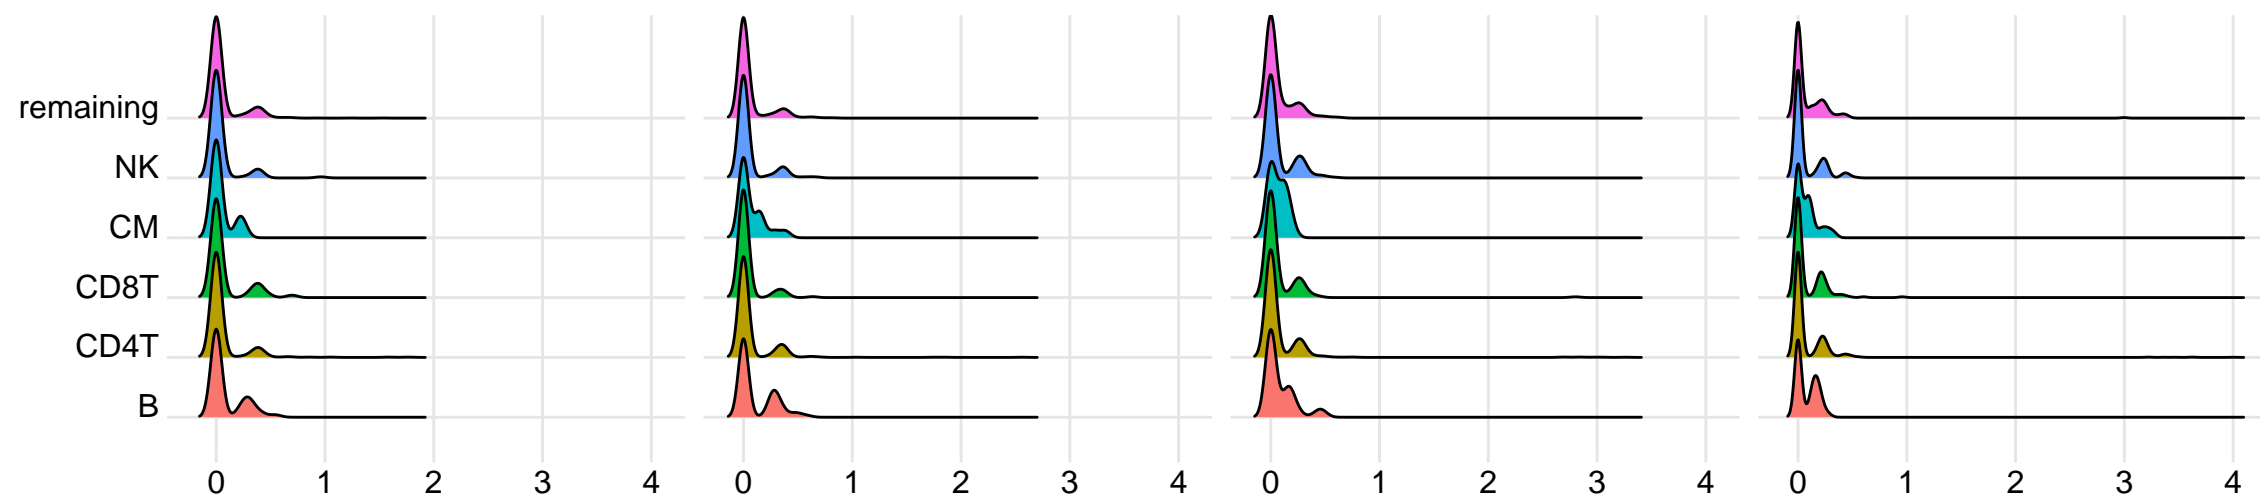

### TCR.Vg9

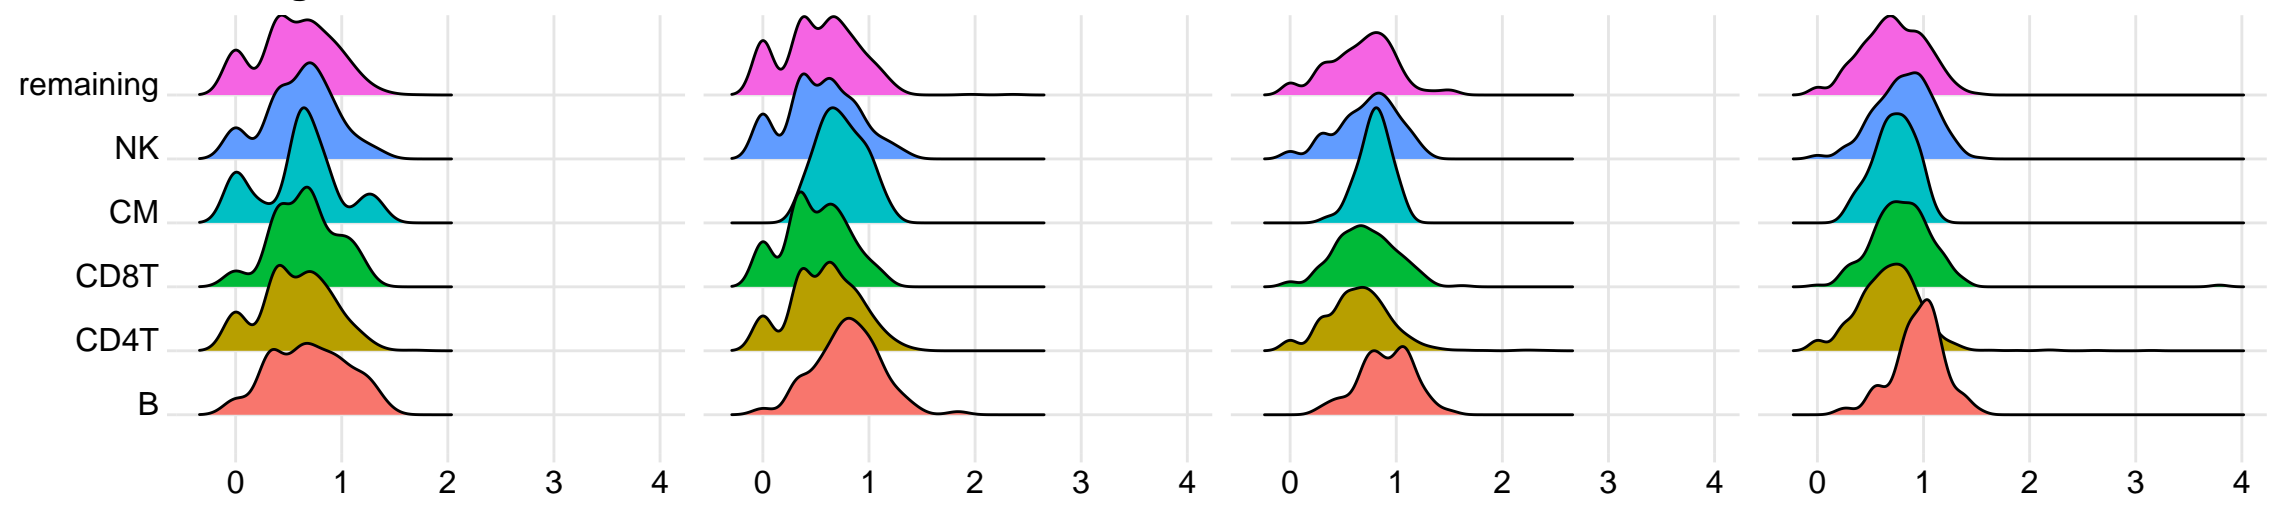

### TCRgd

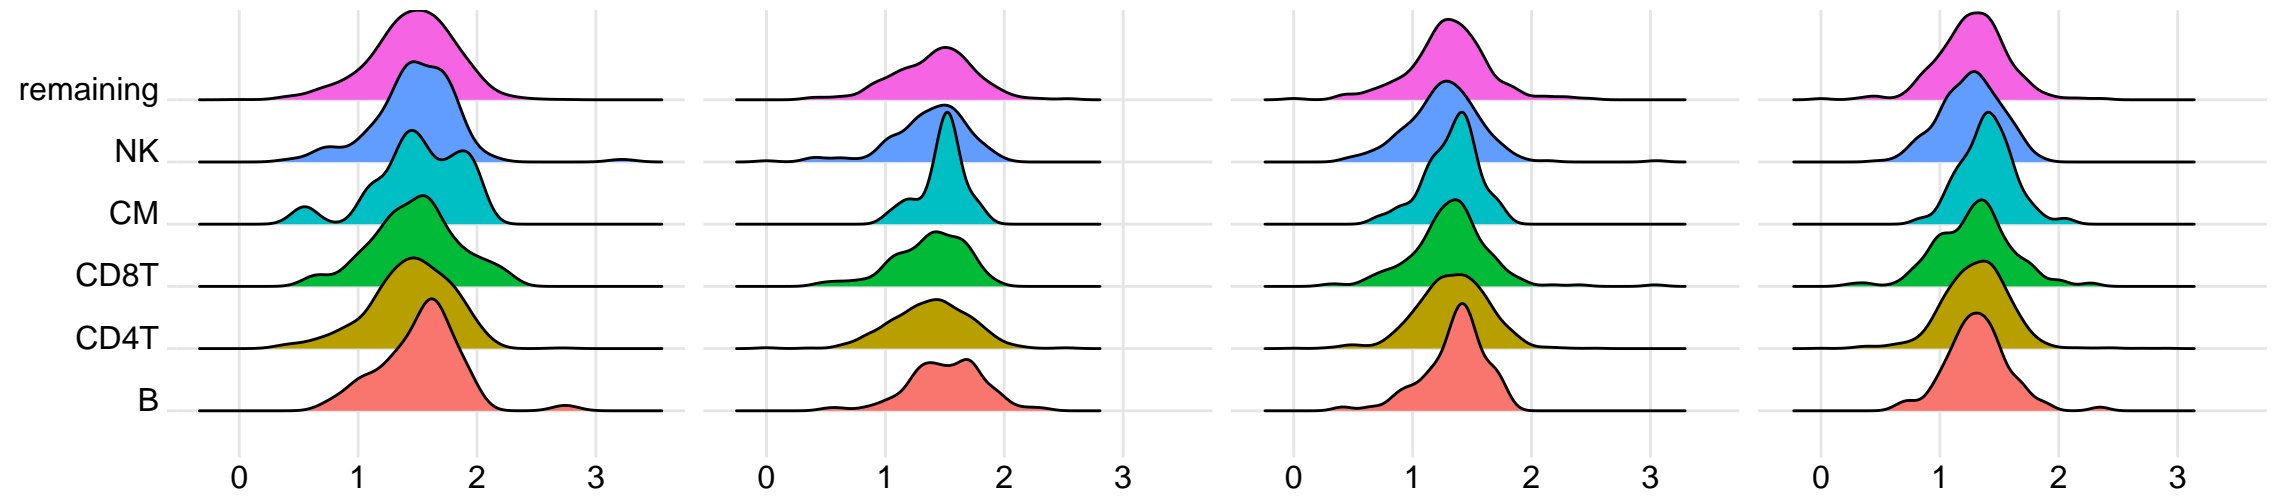

### Thr181

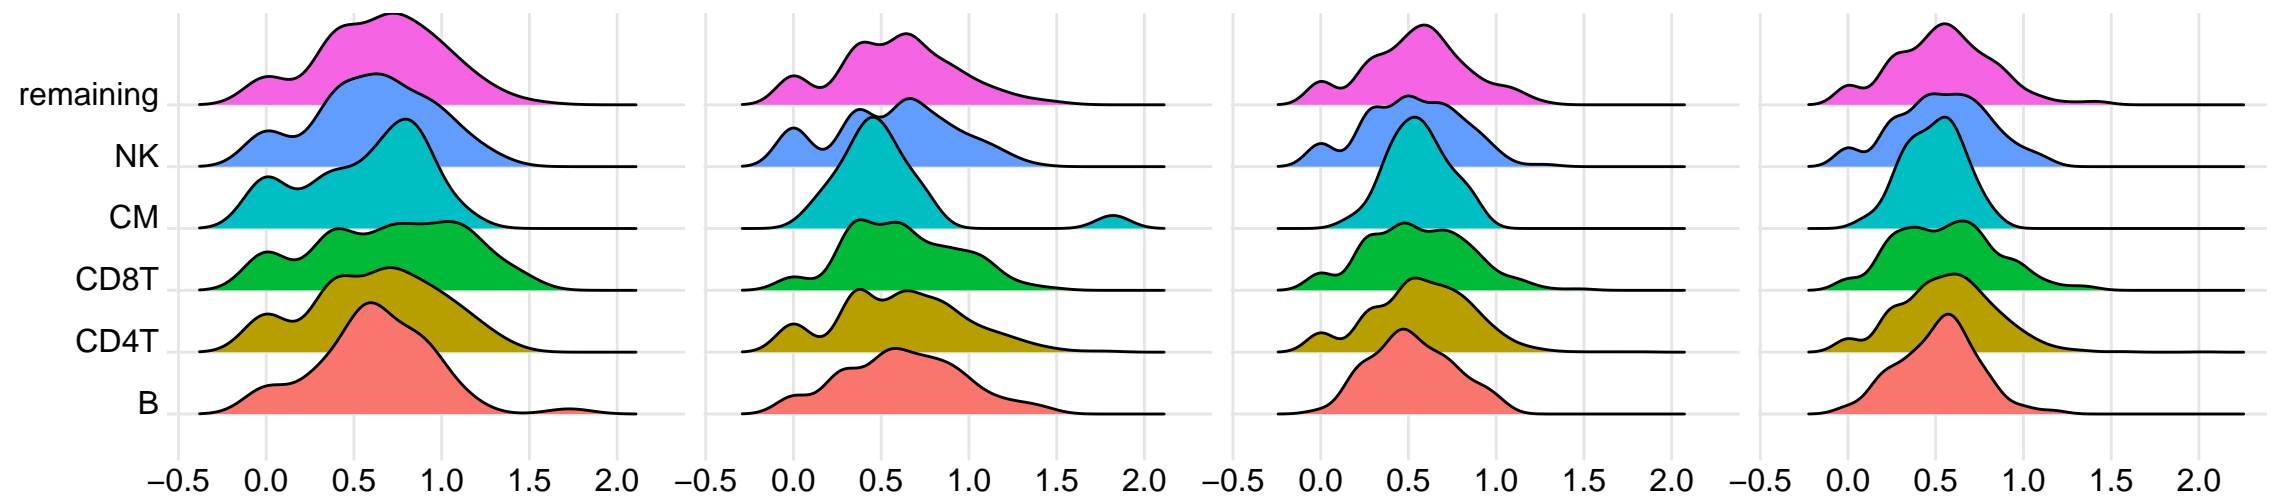

### TSLPR

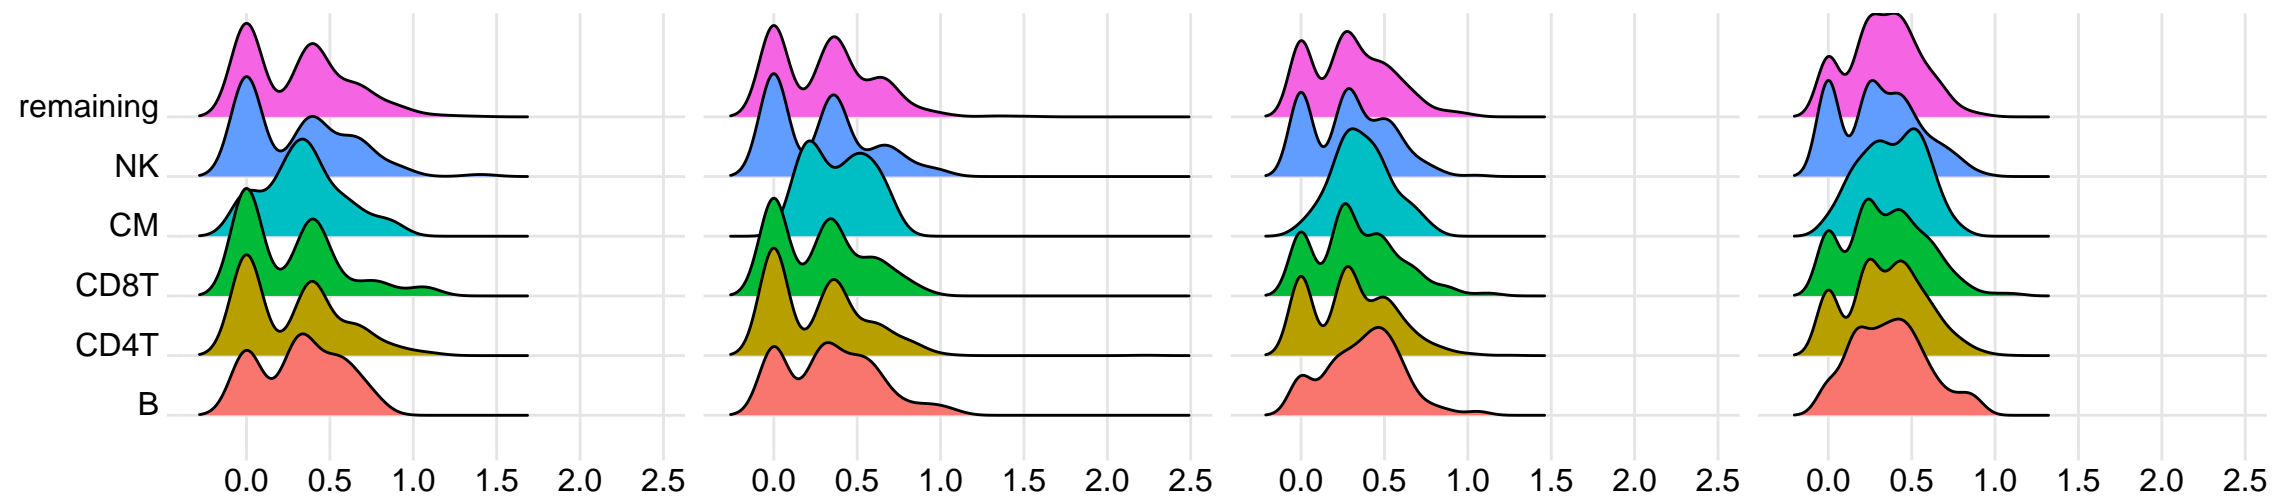

Supplement: 41598_2022_24371_MOESM3_ESM.pdf [file 41598_2022_24371_MOESM3_ESM.pdf]
