# Supplementary material for: Titration of 124 antibodies using CITE-Seq on human PBMCs
Source: PubMed Central journal article supplement (PMC9718773; doi:10.1038/s41598-022-24371-7), 2022-12-02

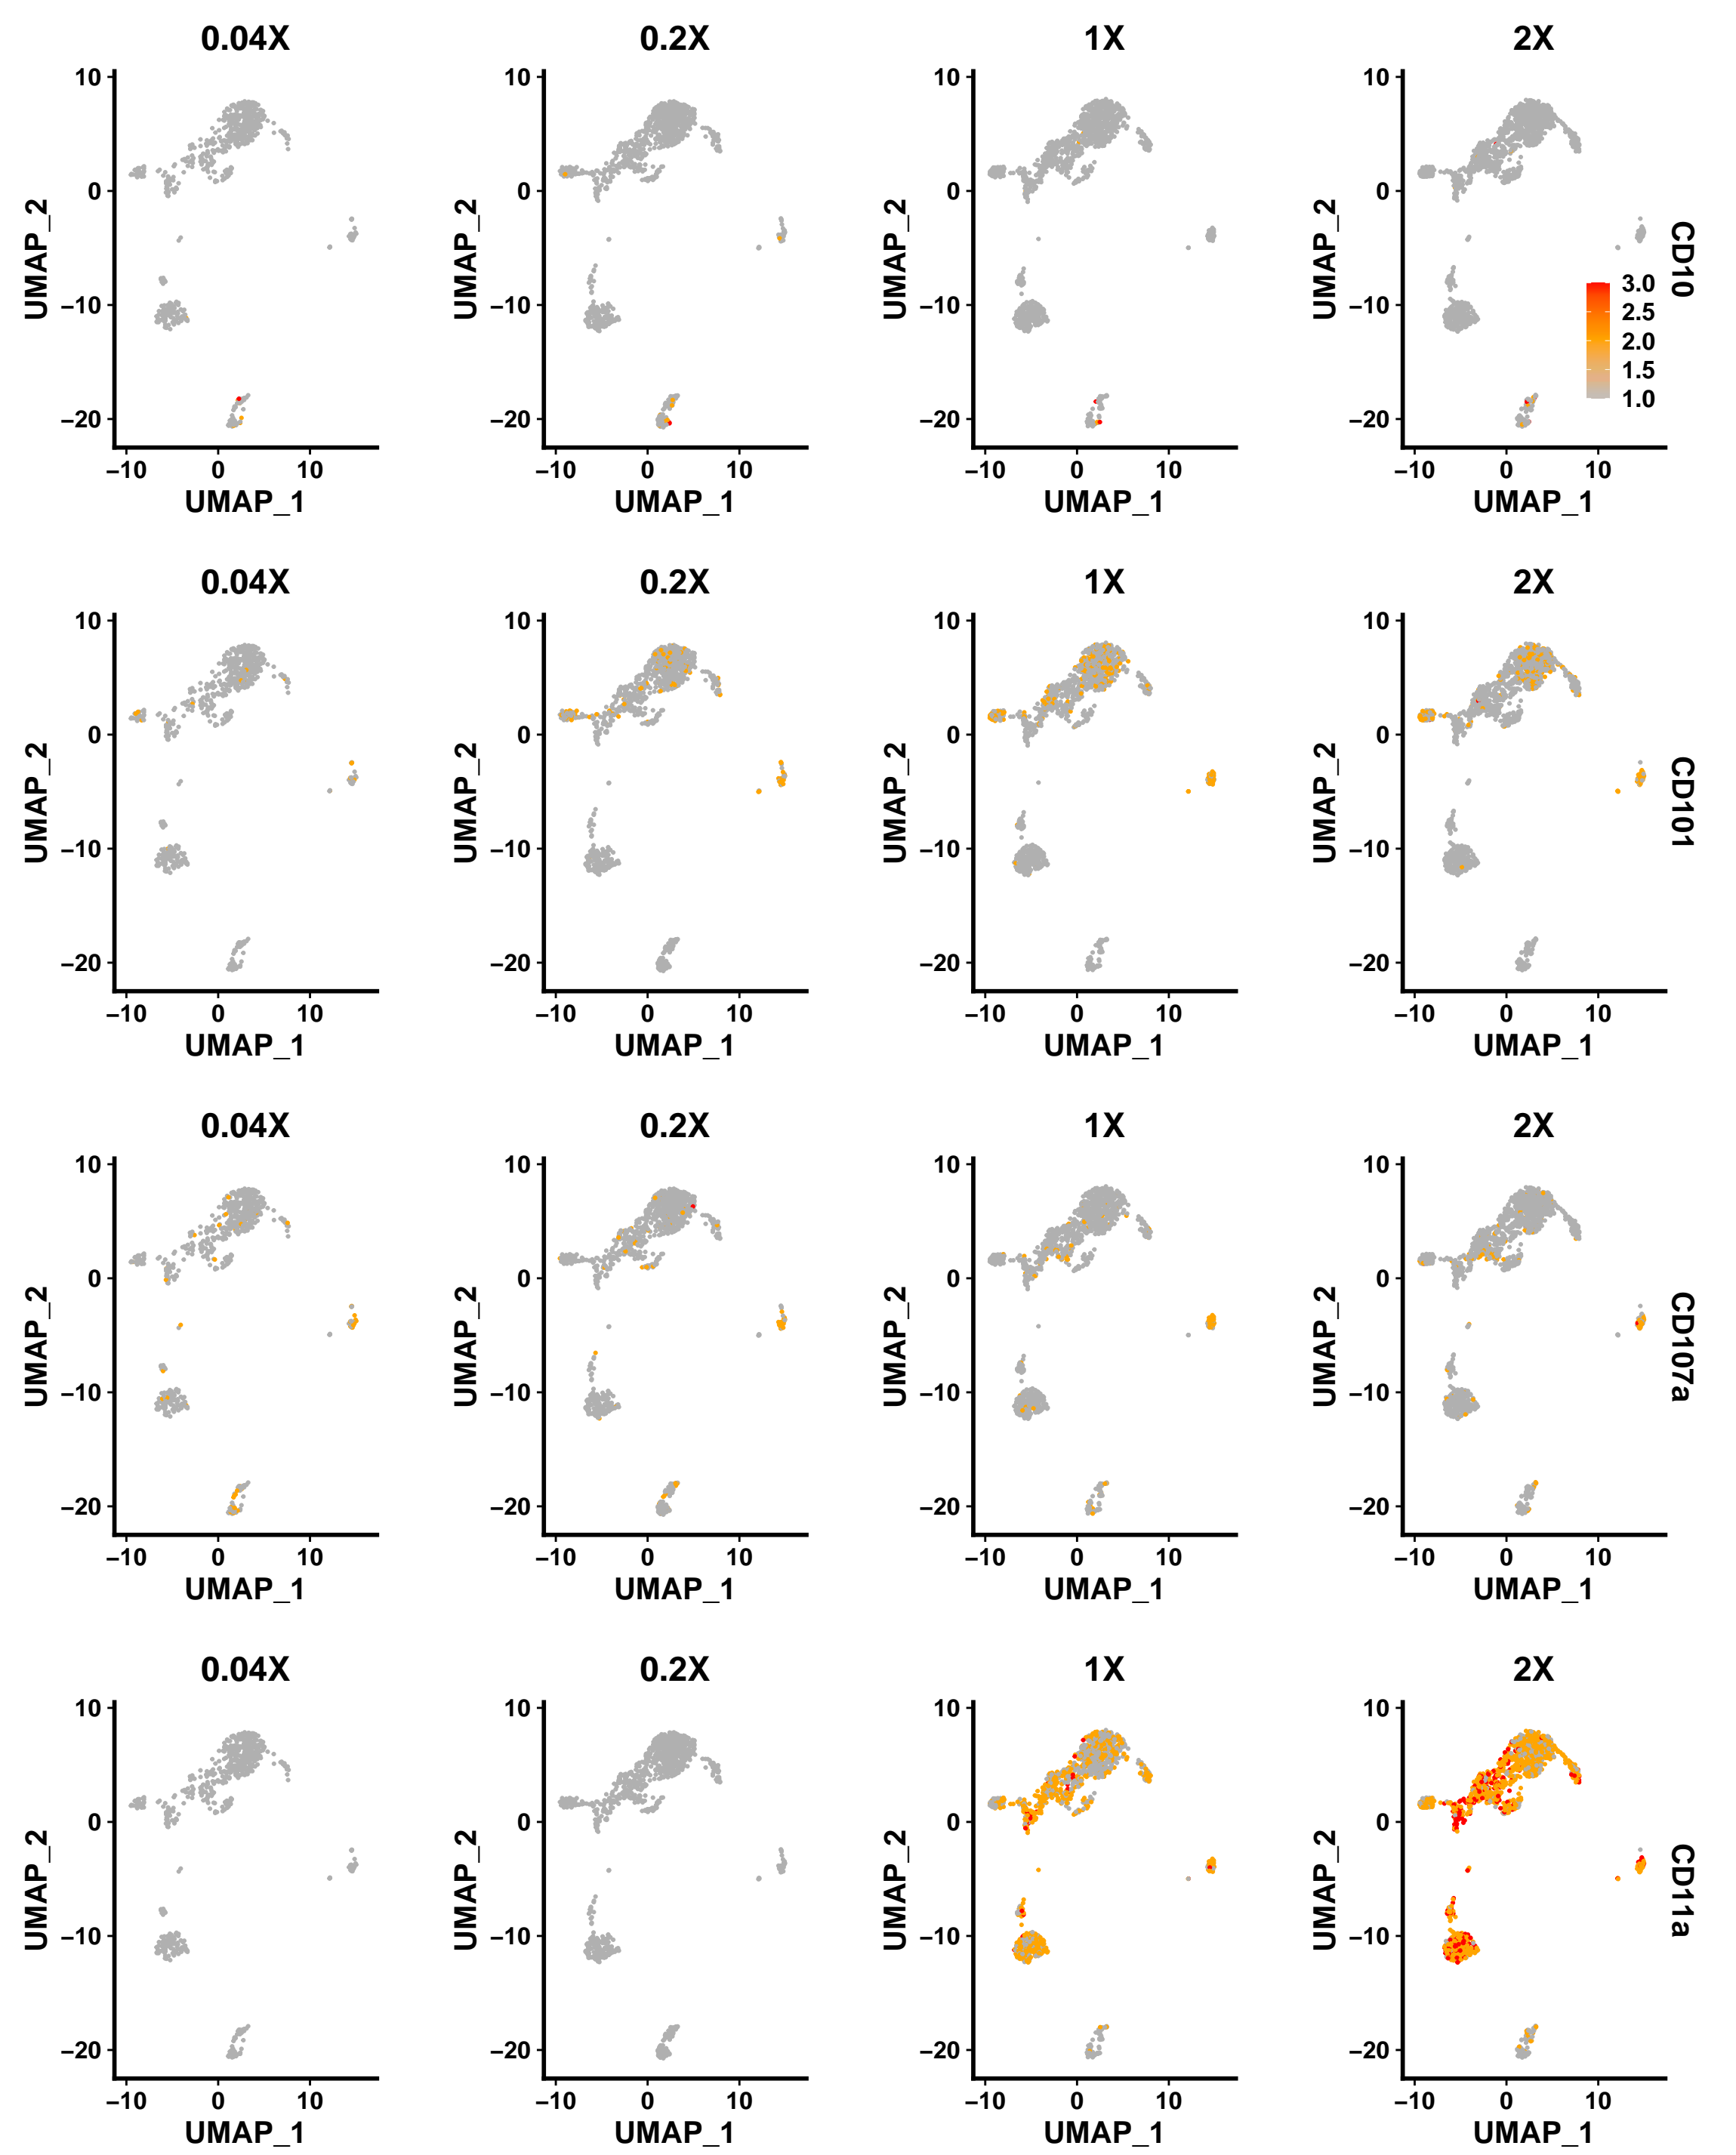

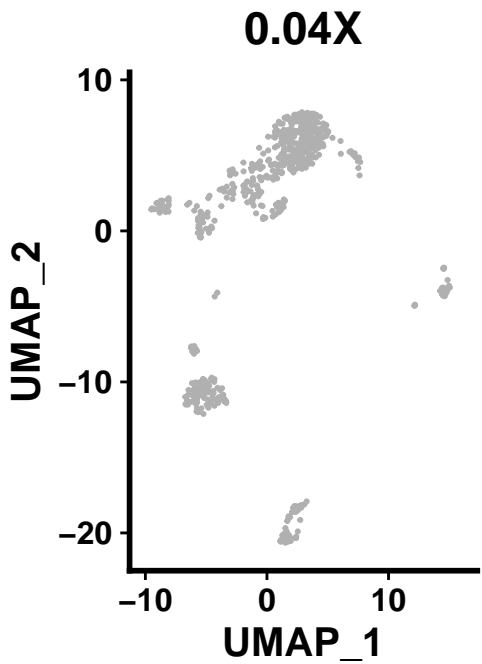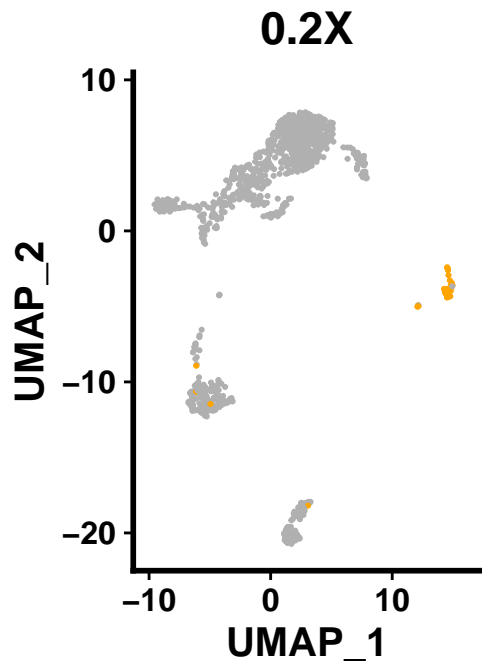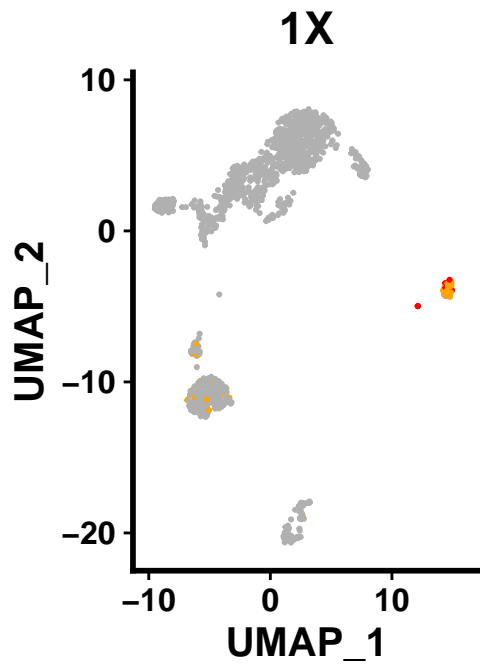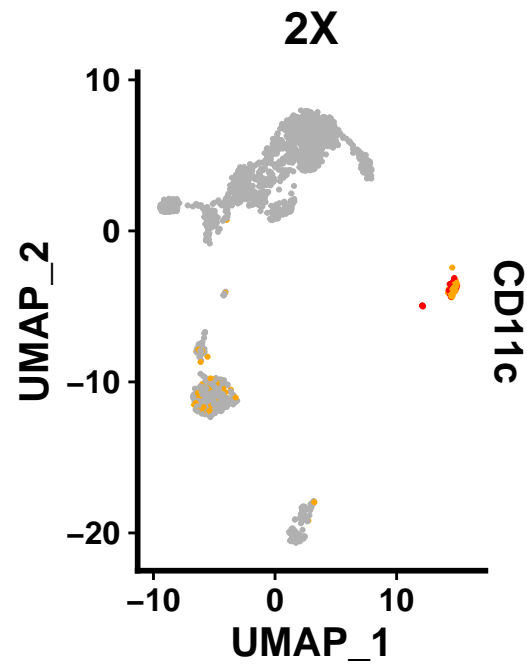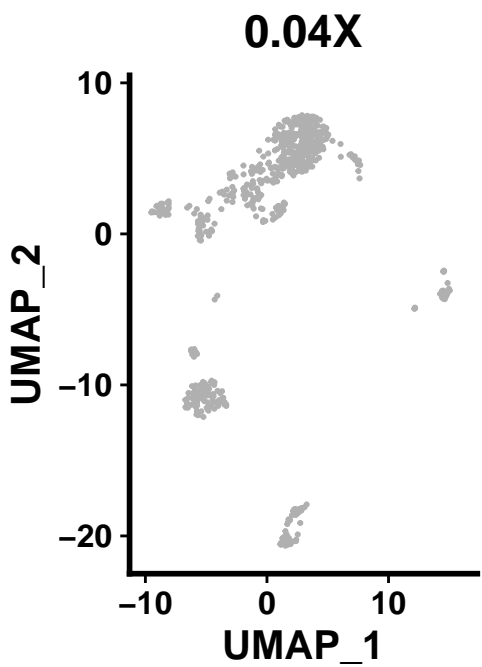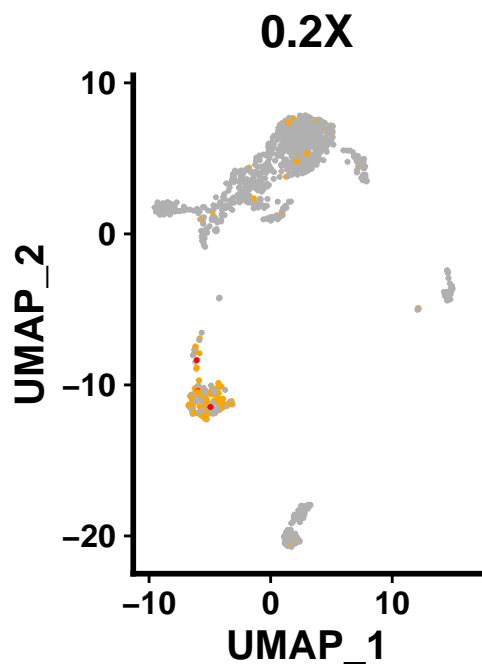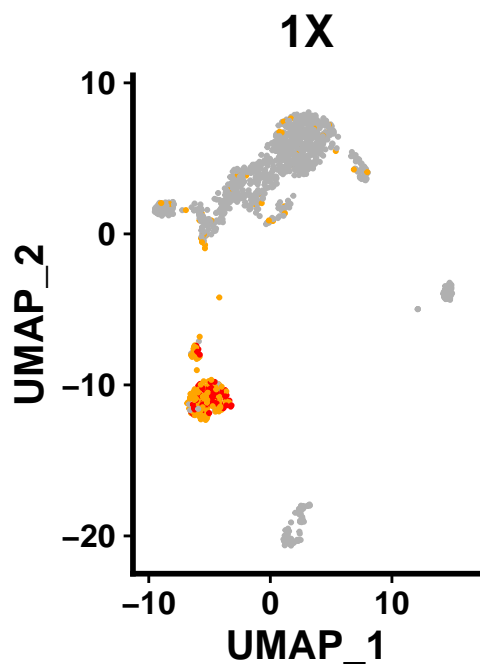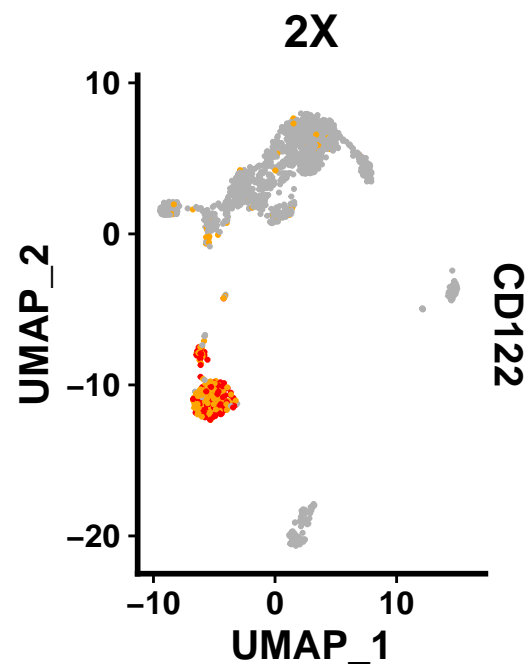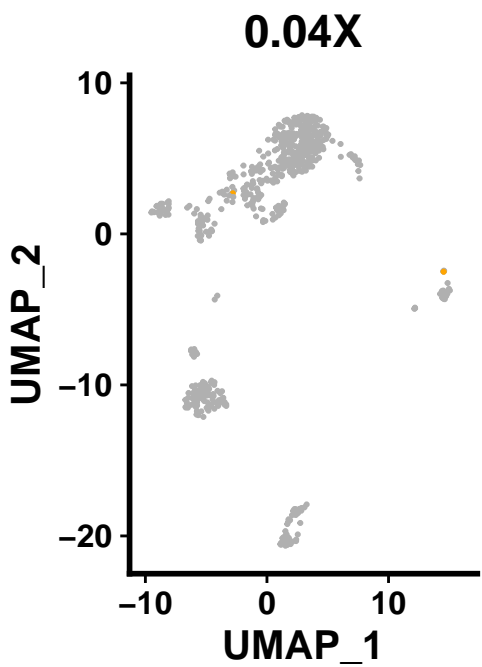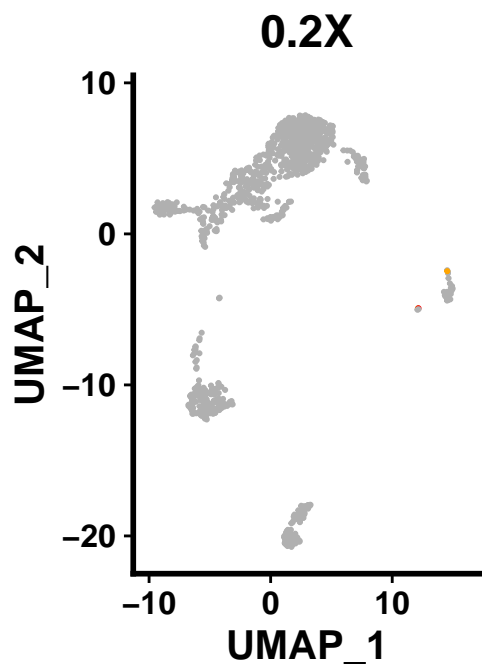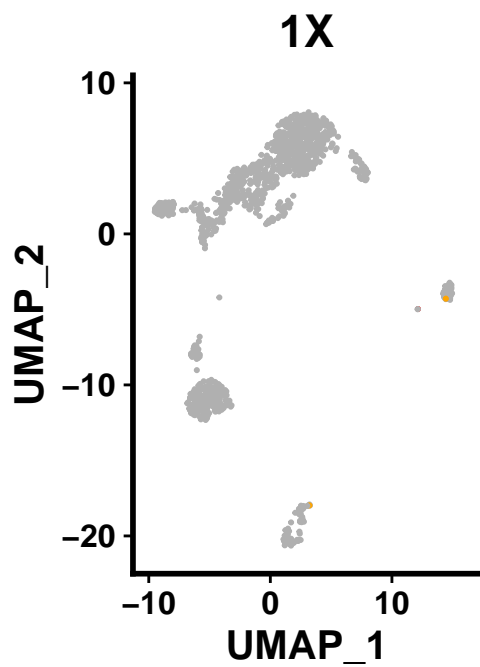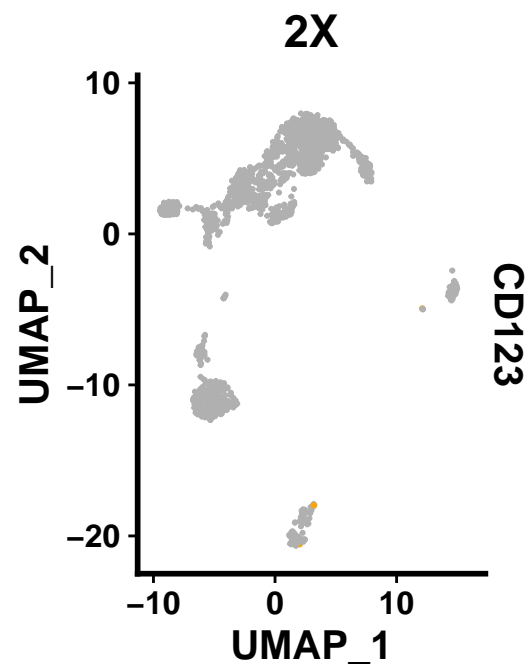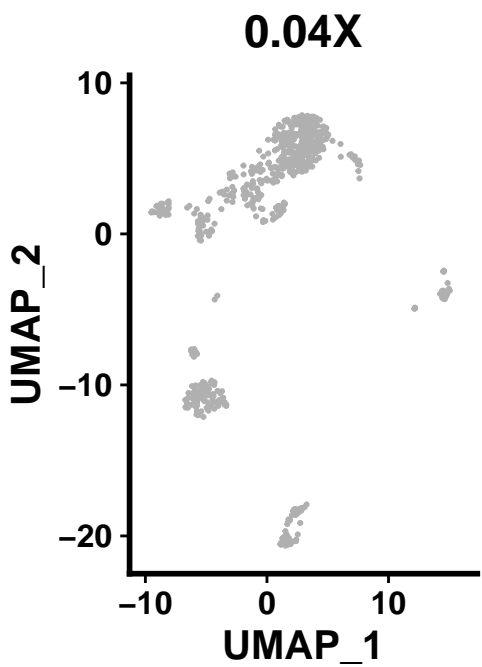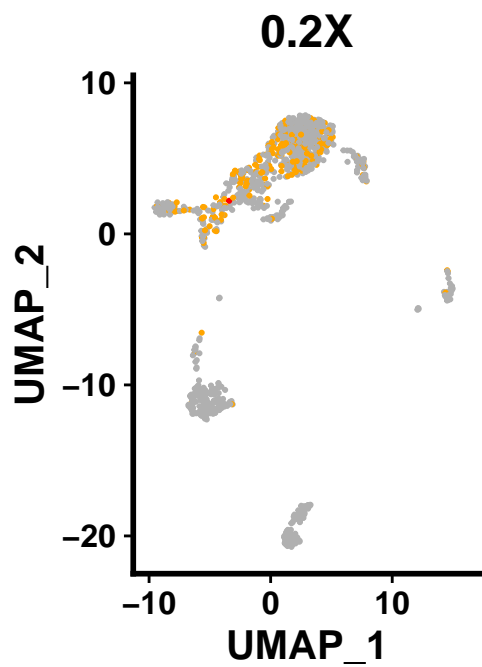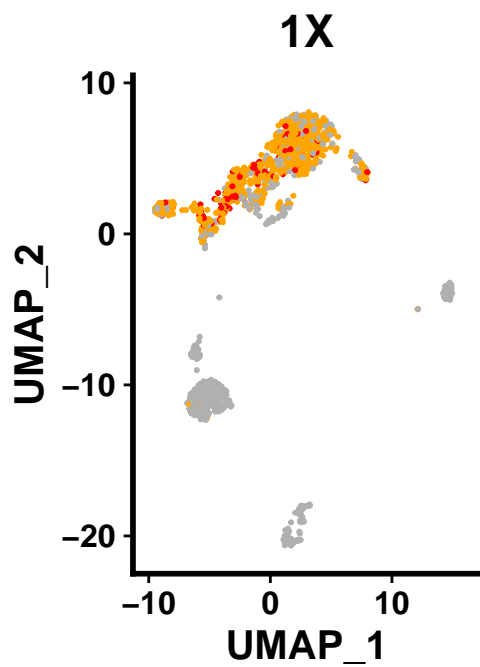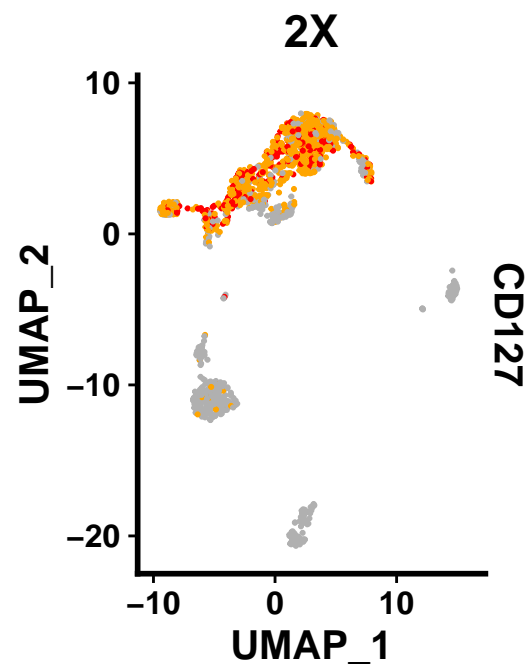

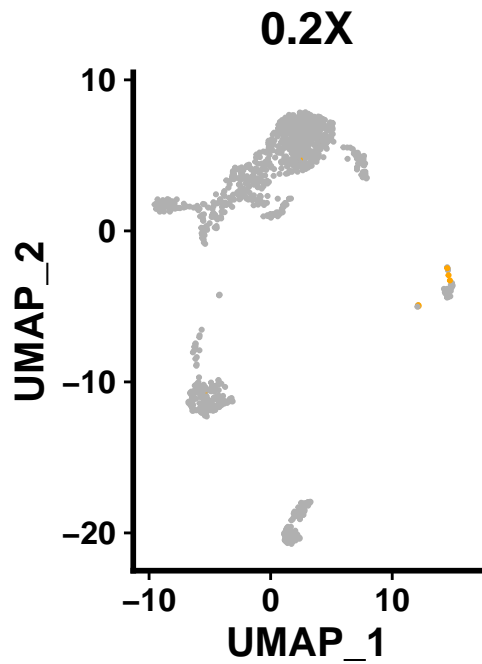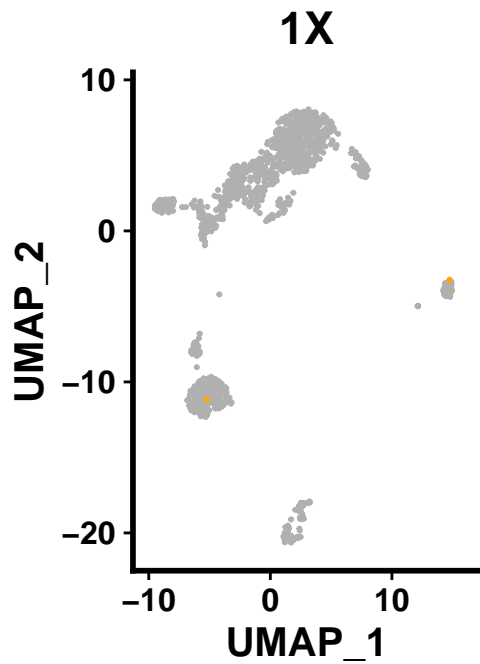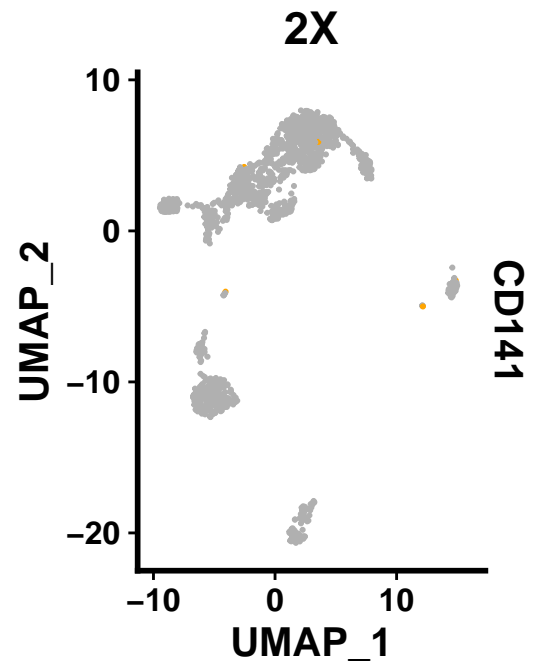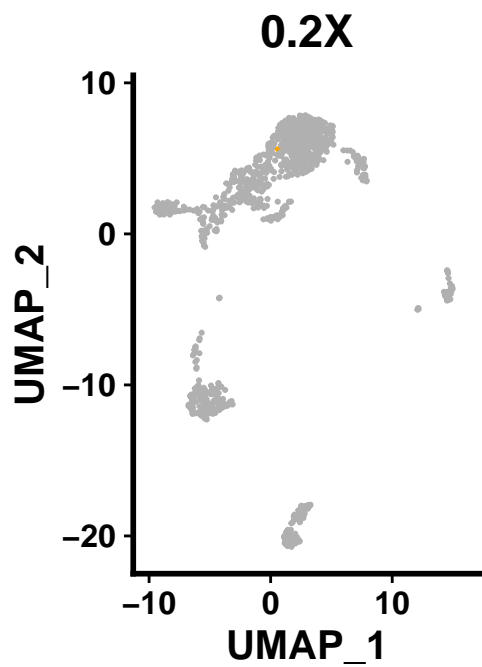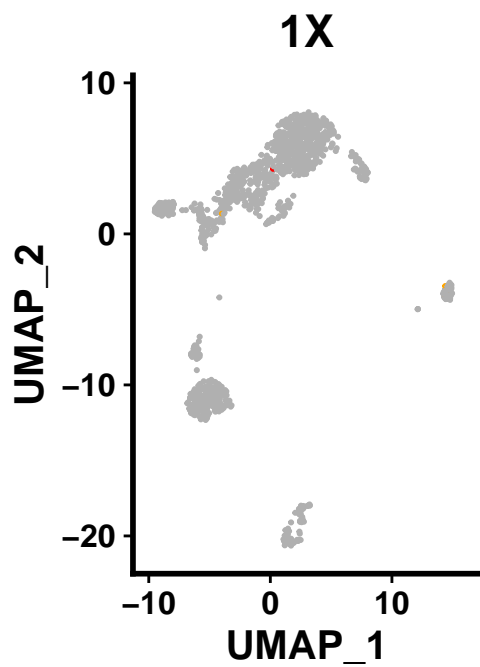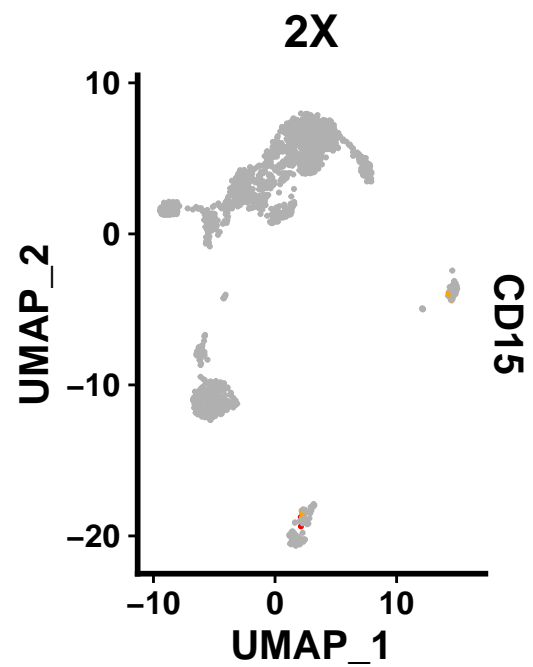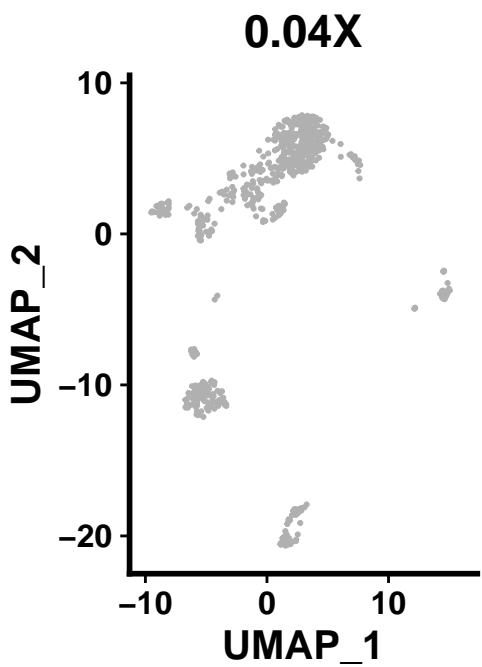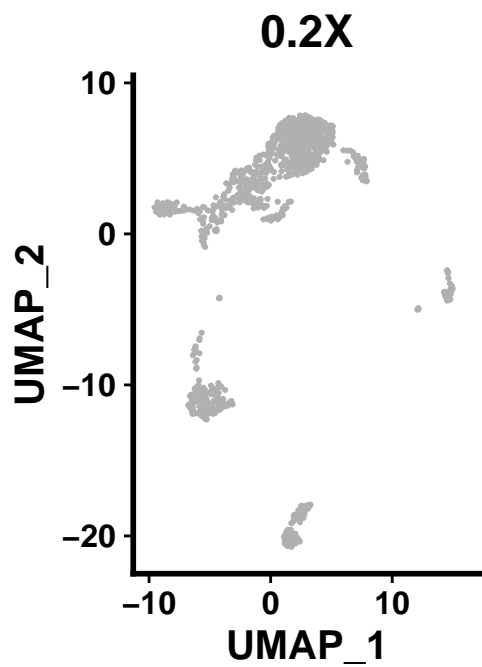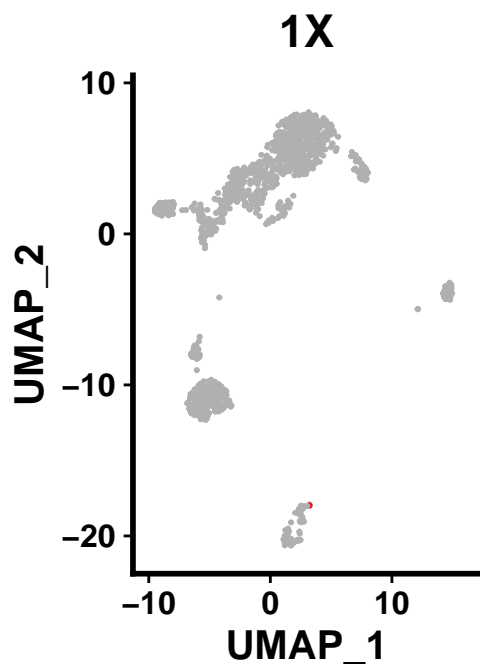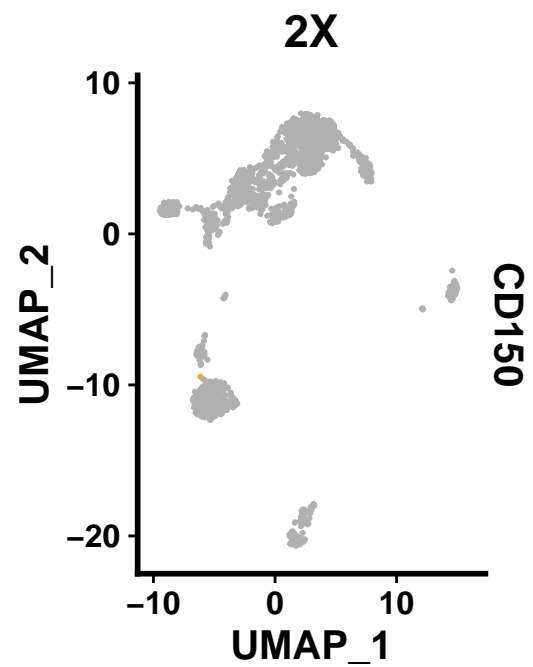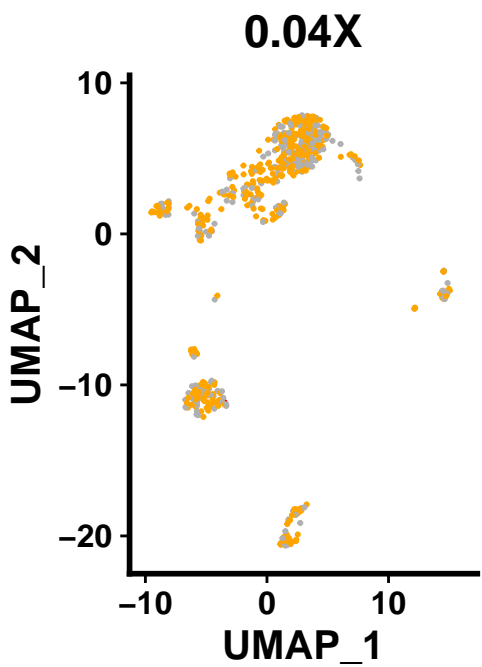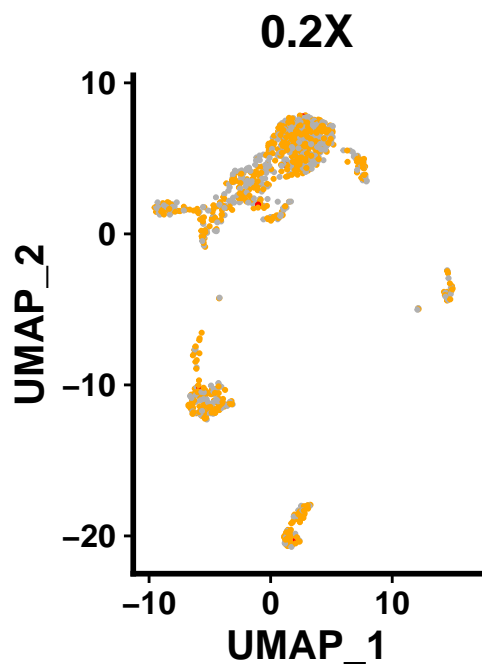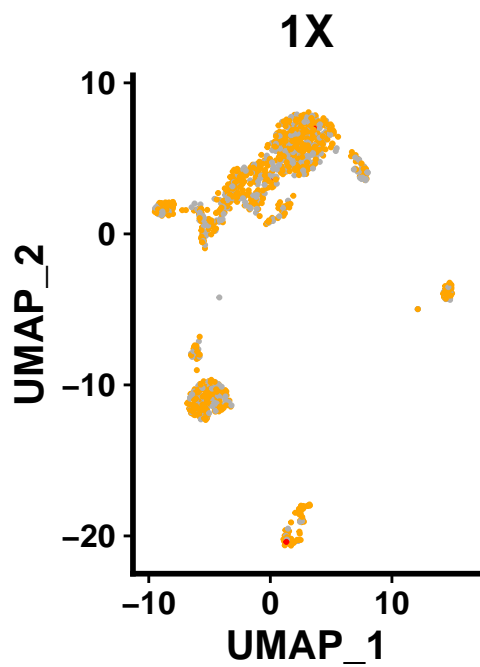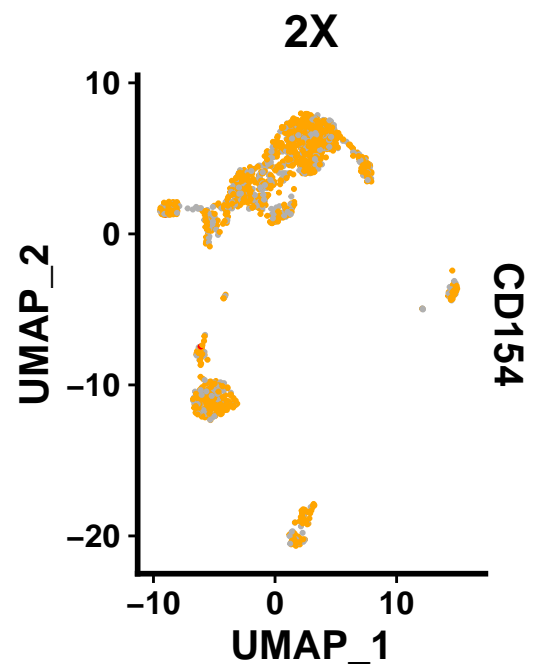

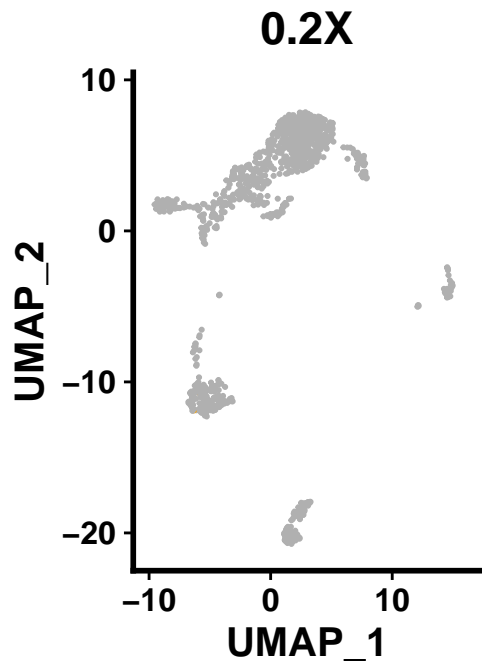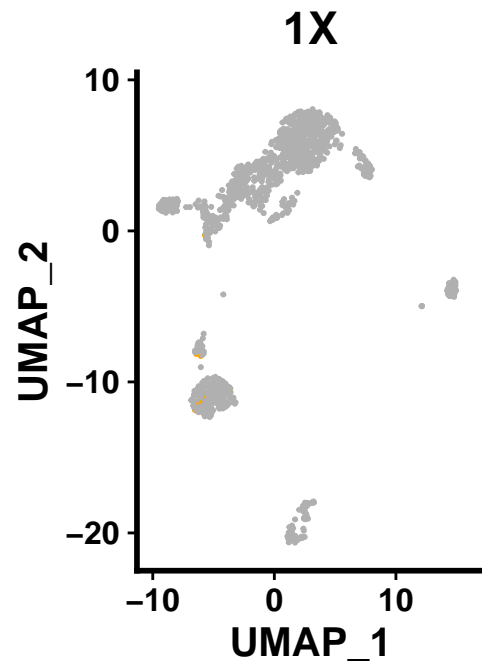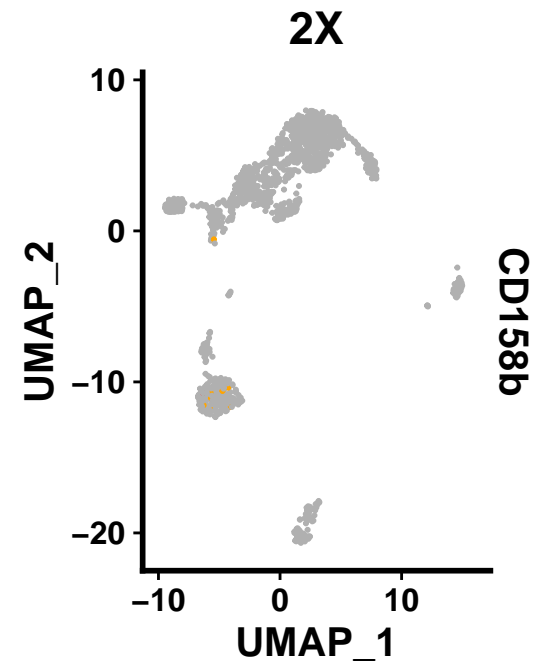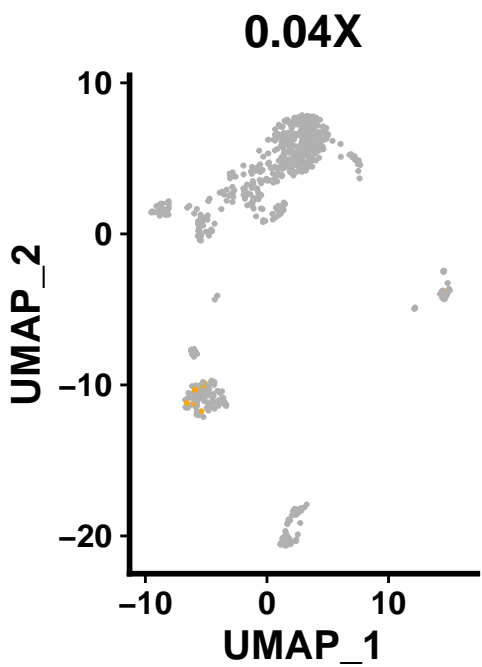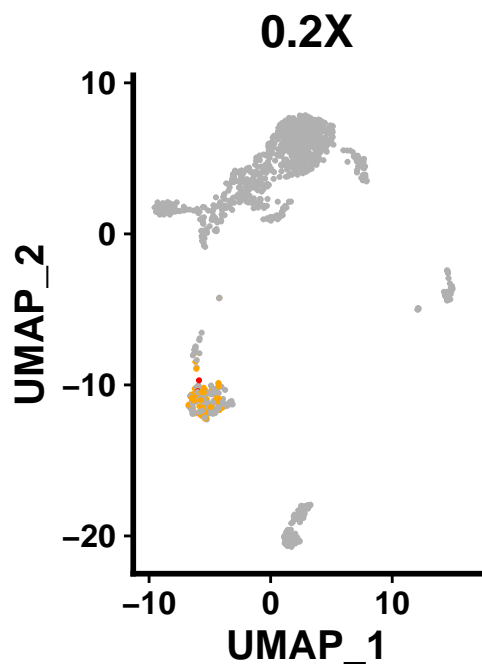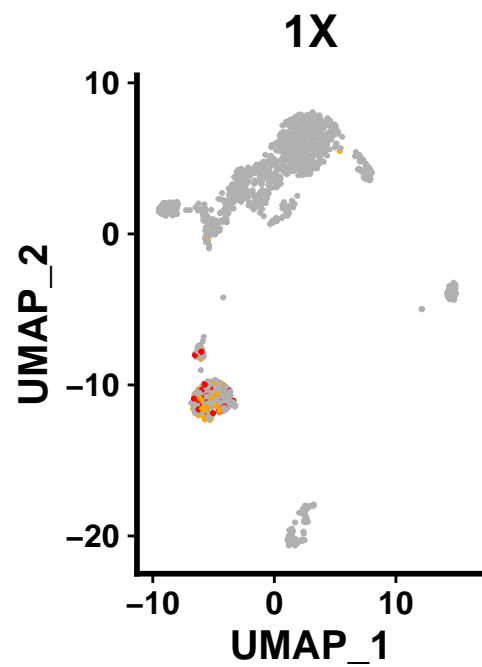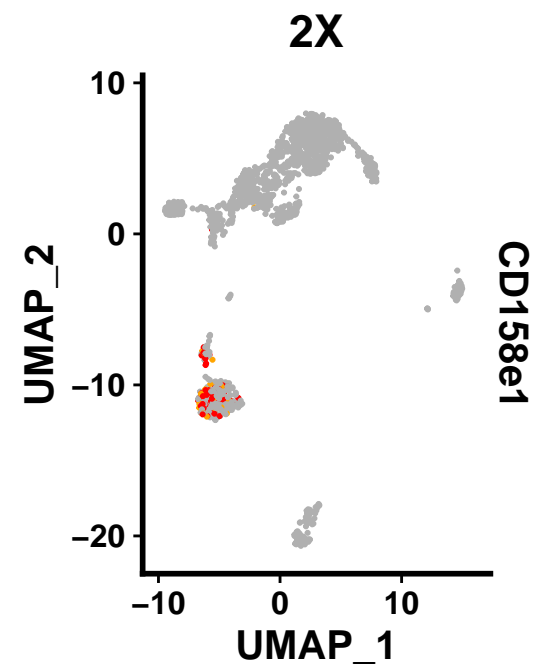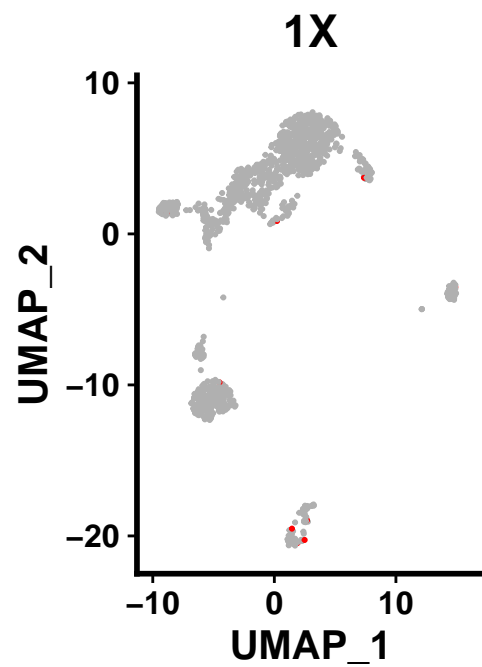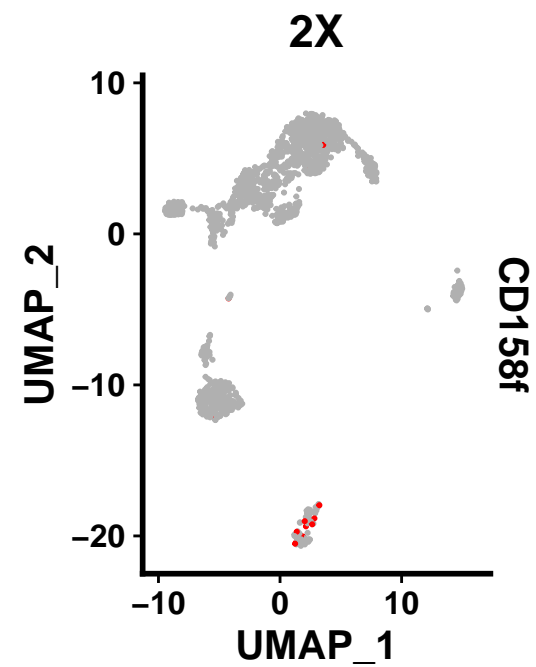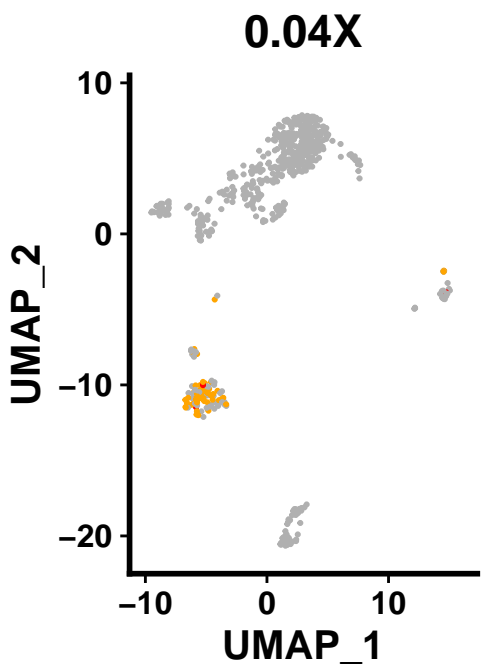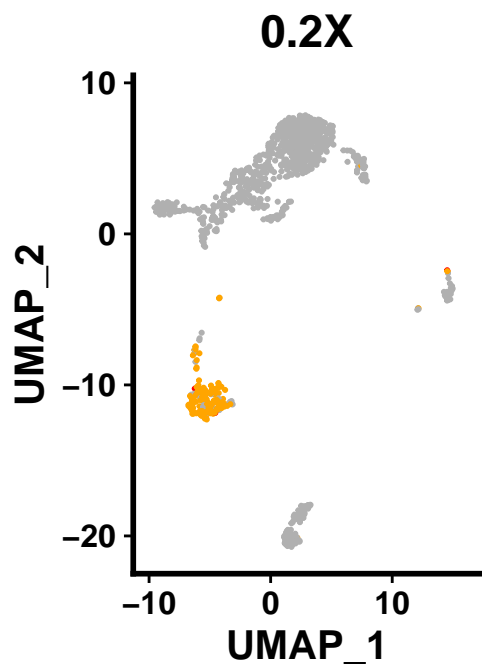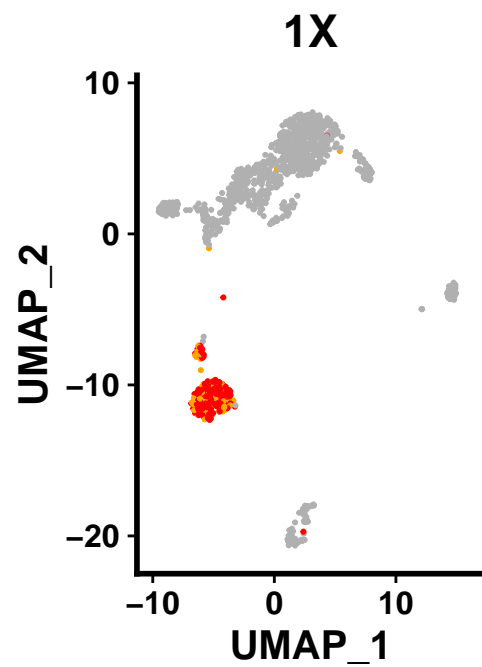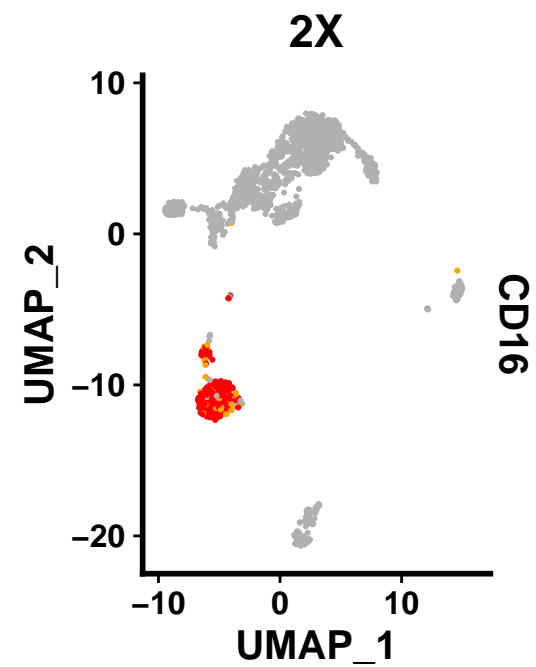

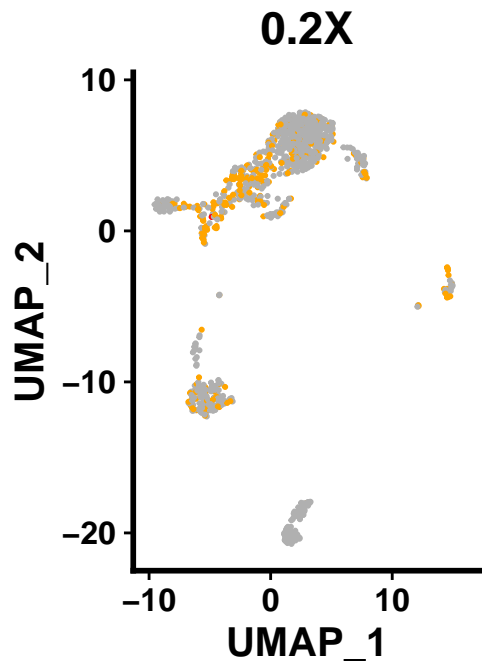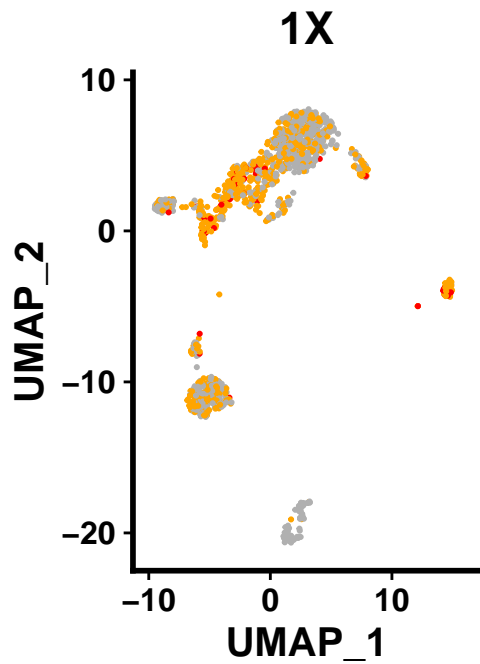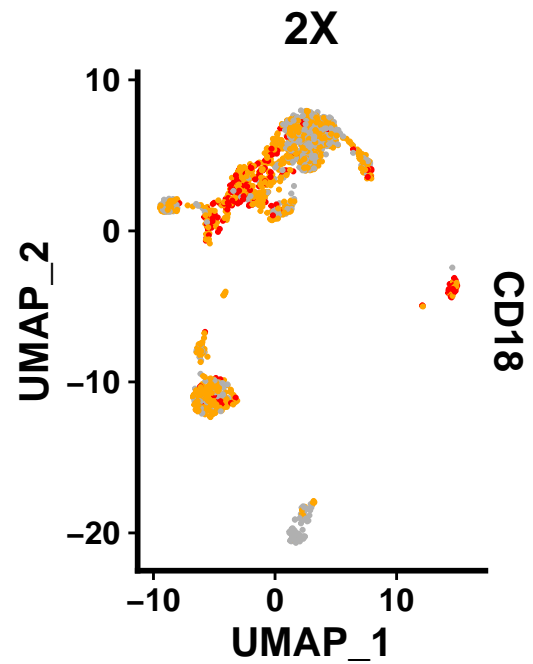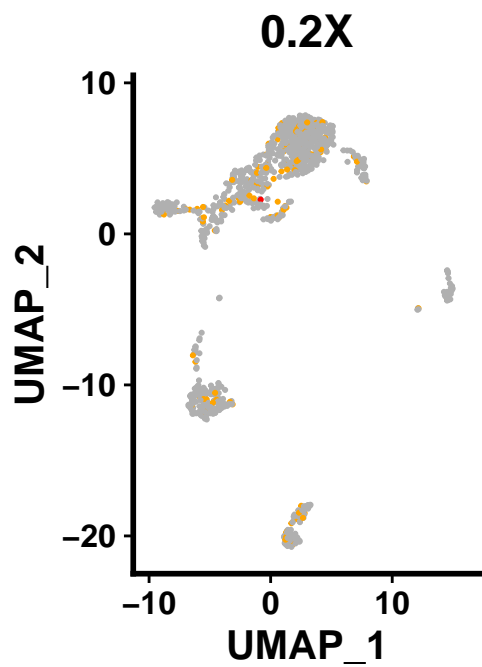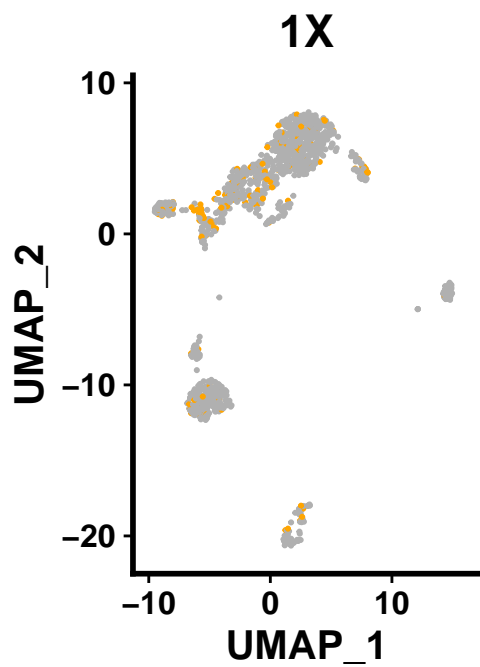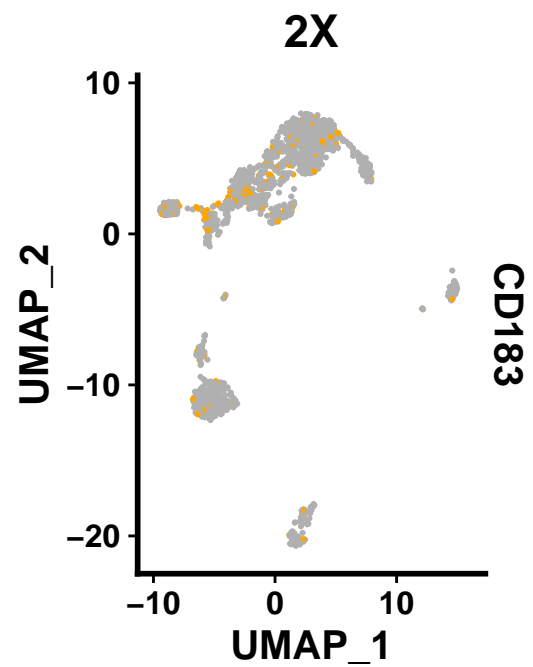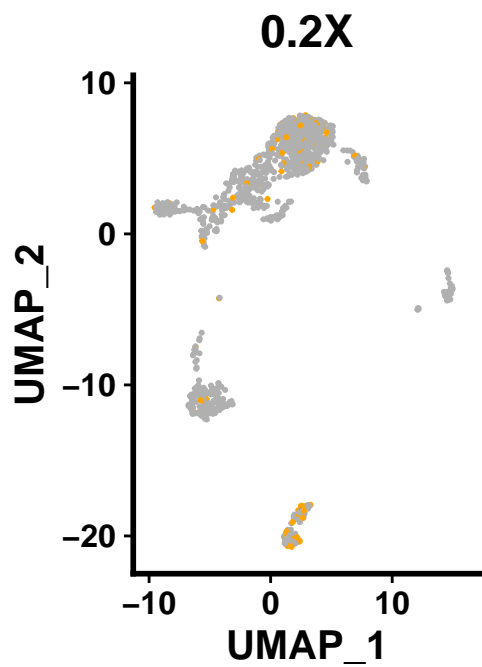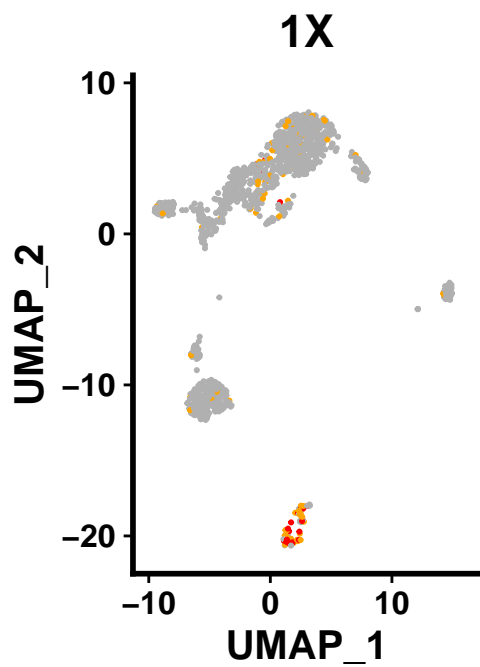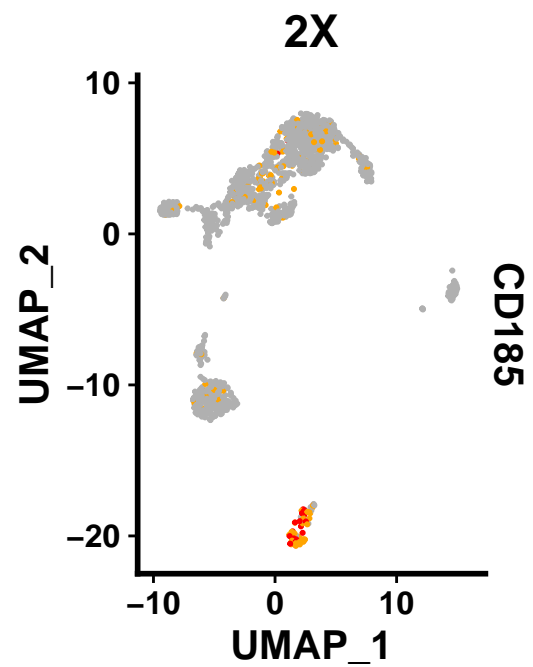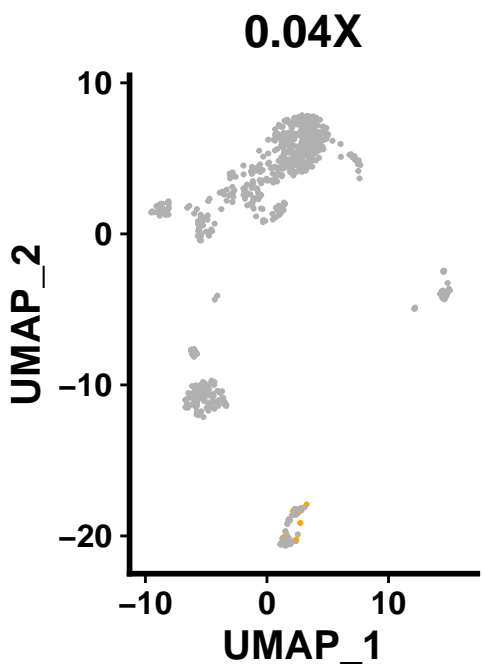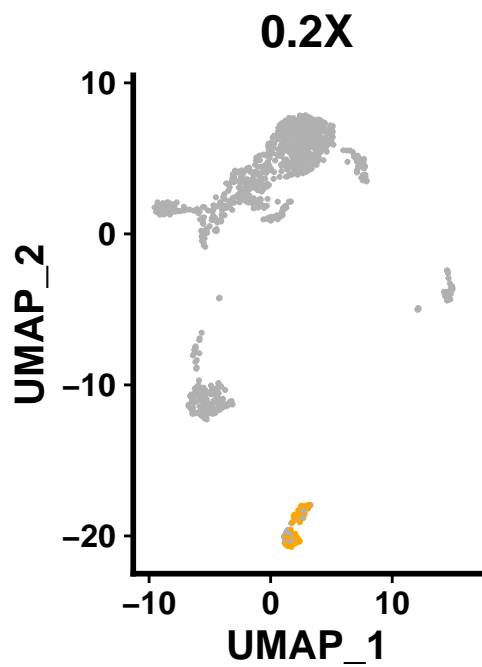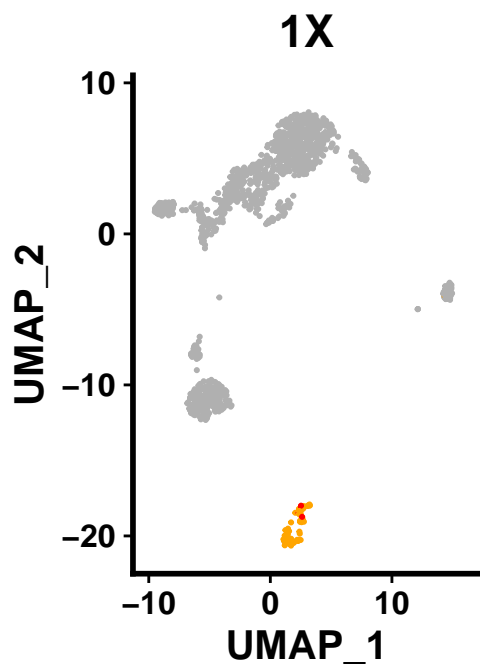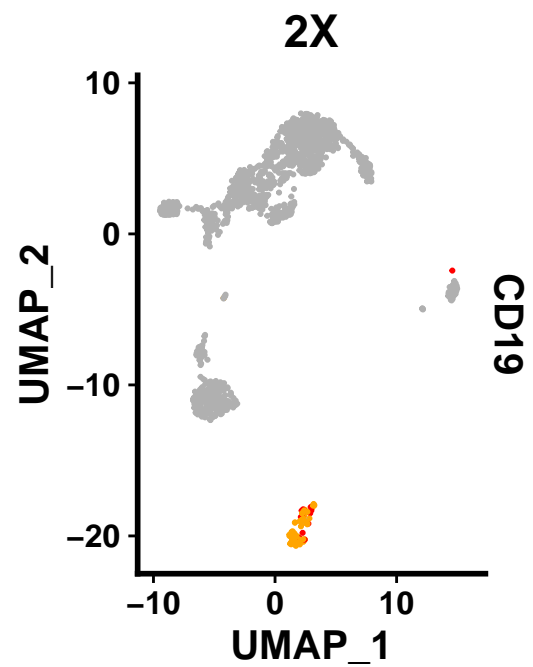

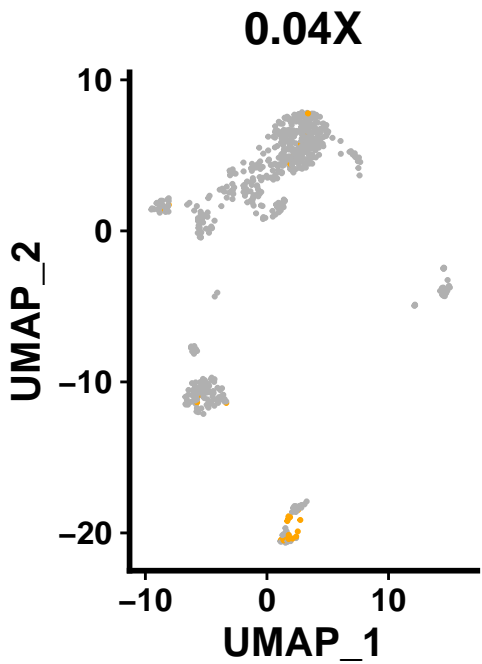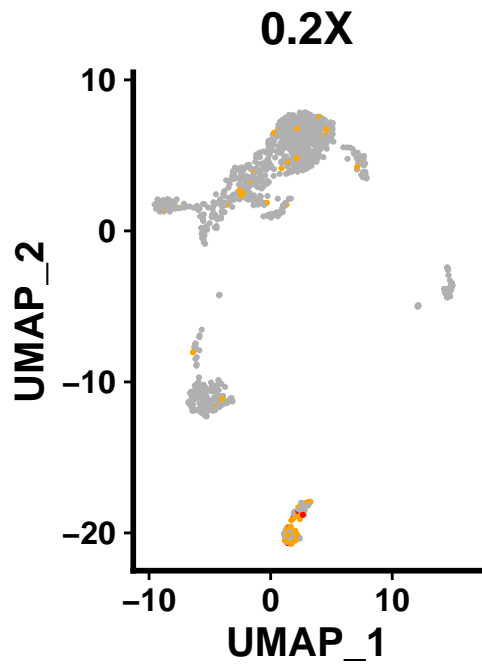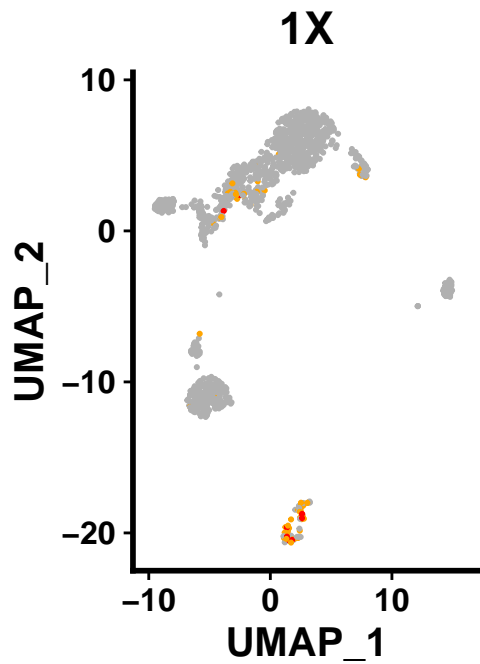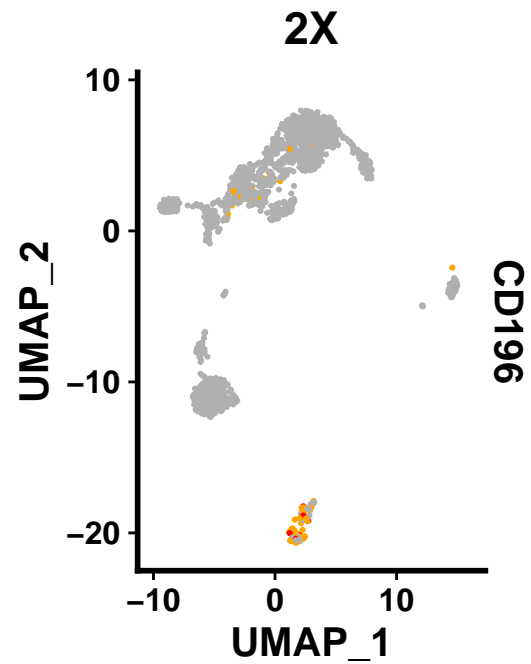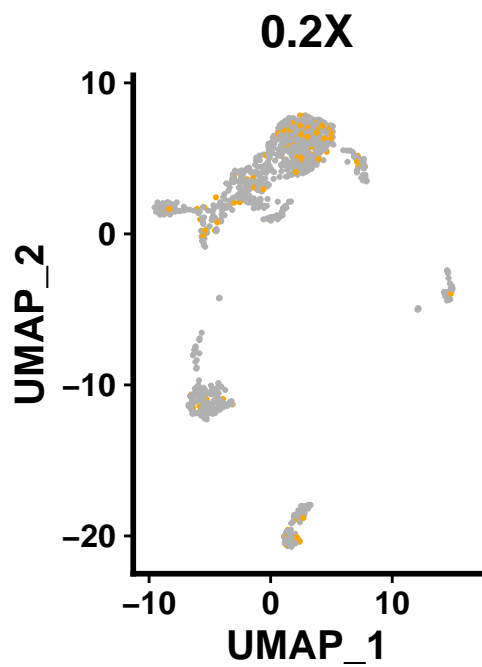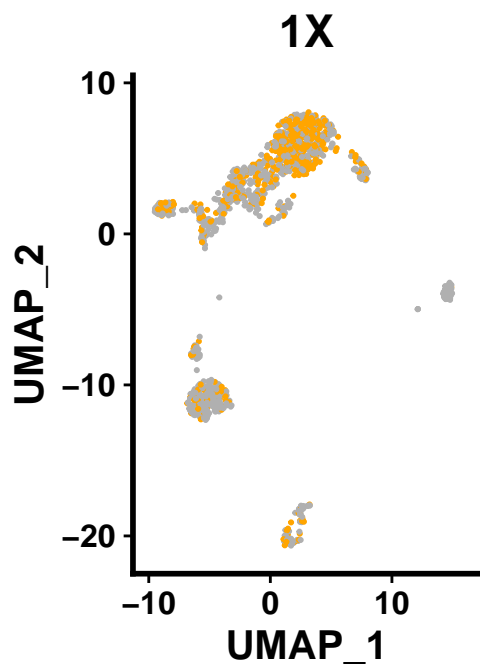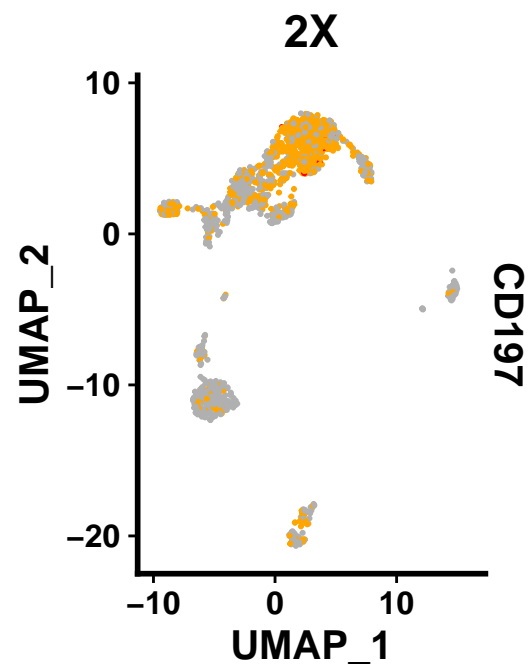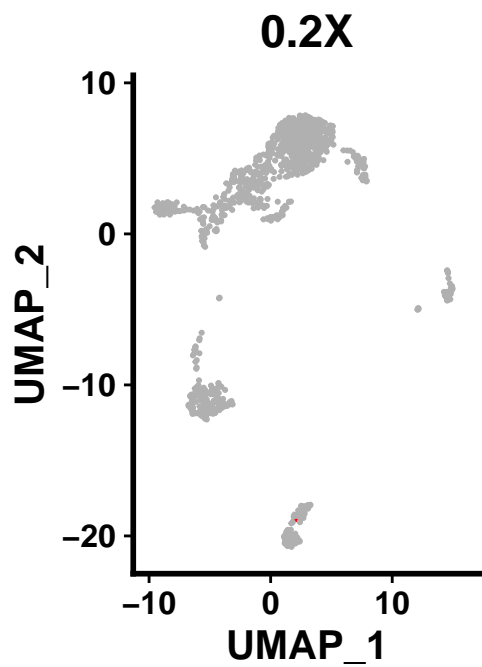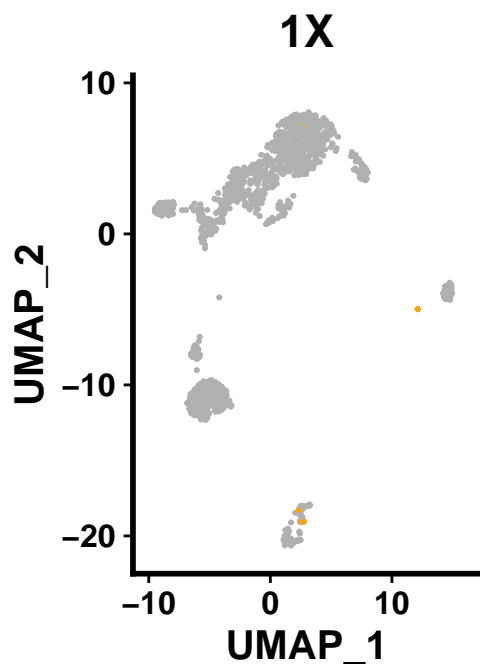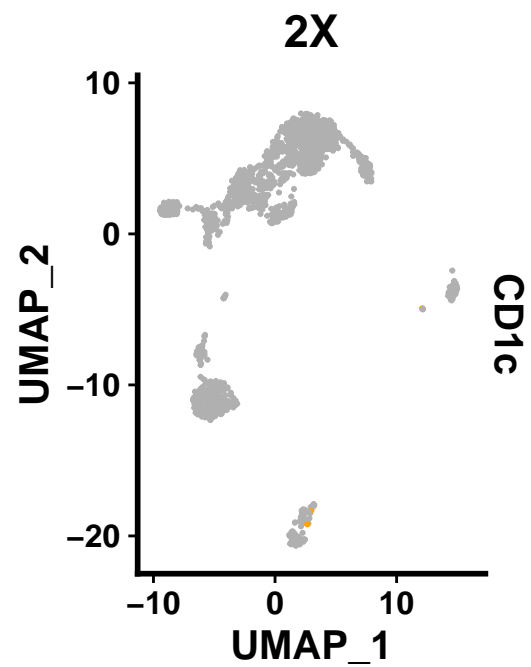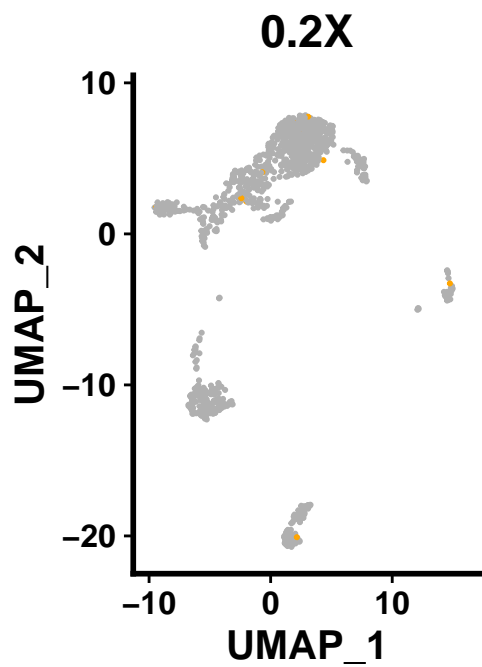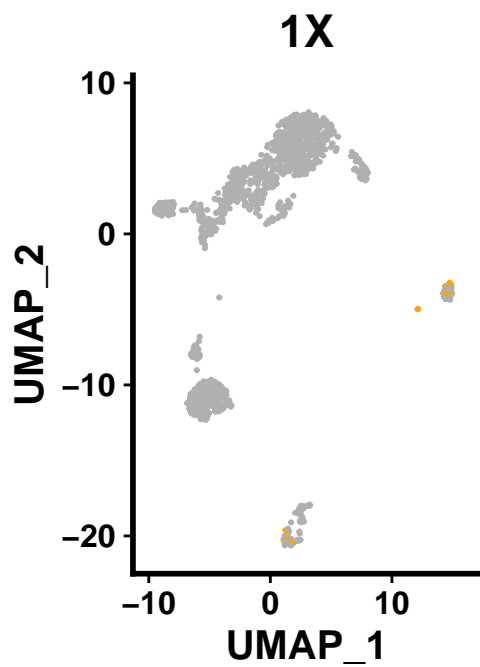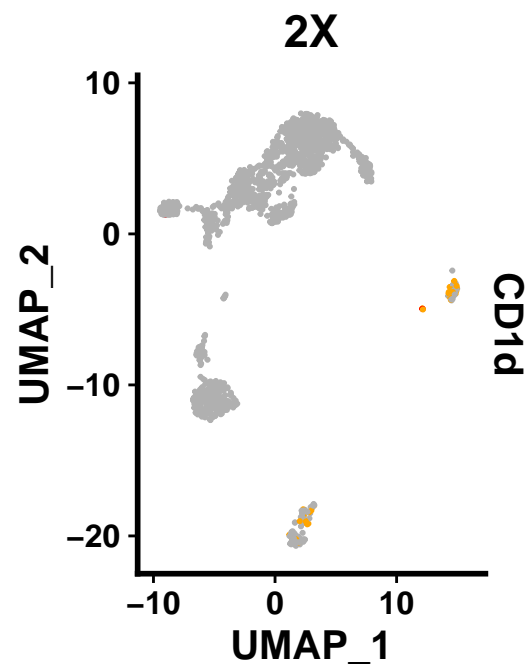

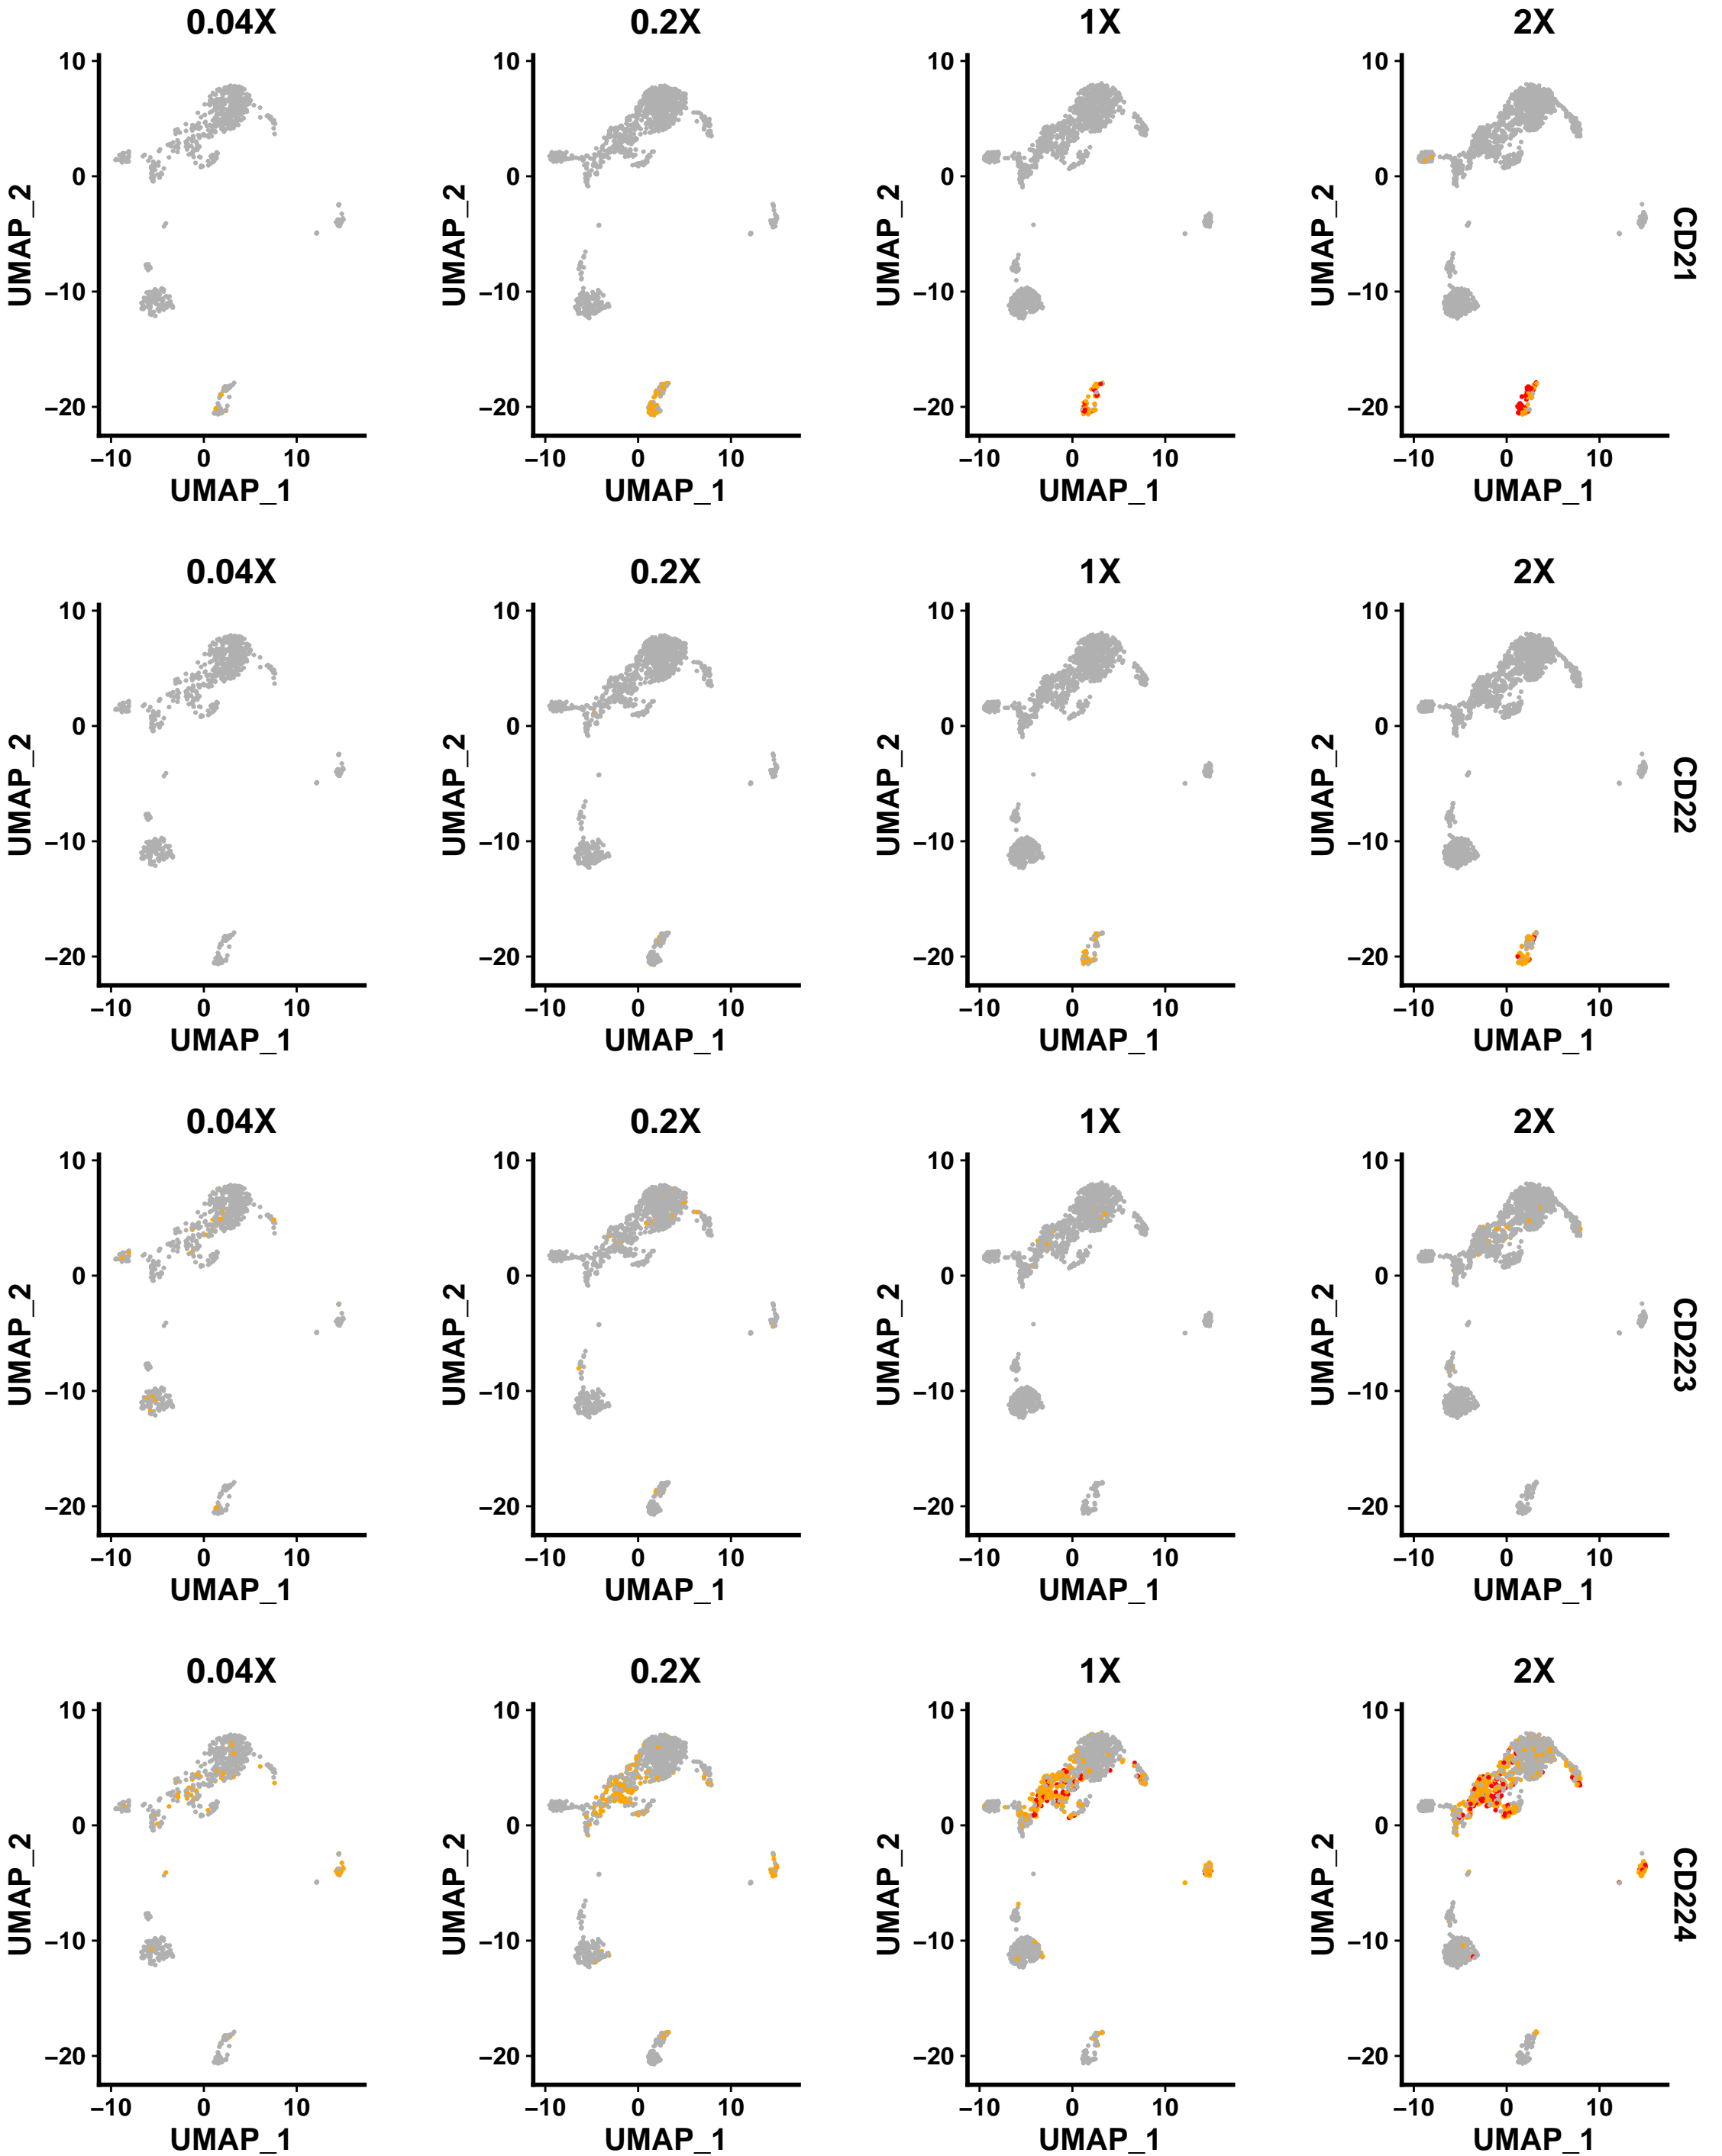

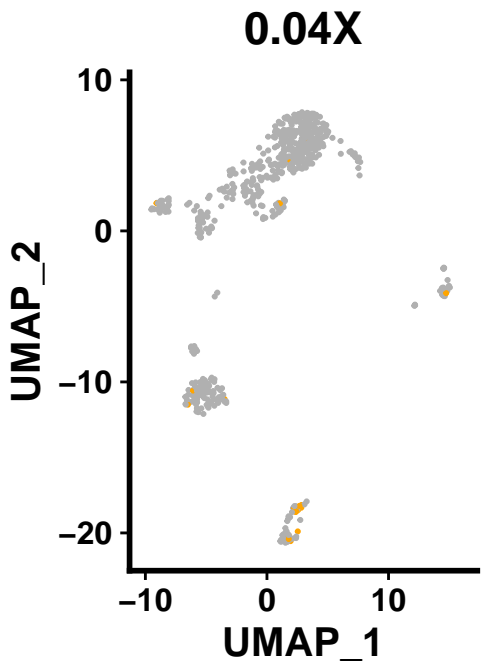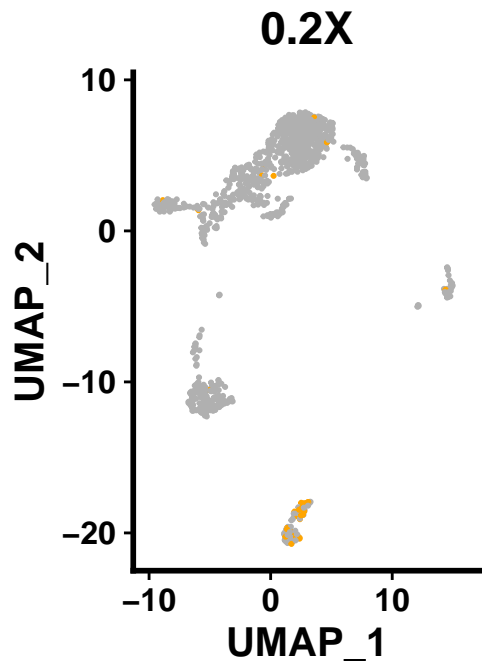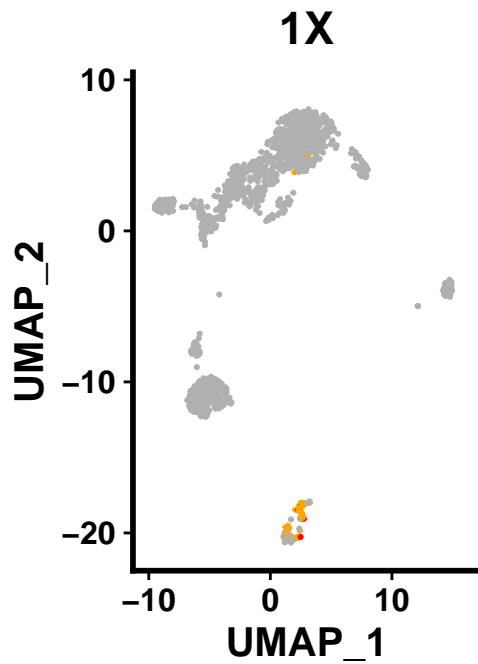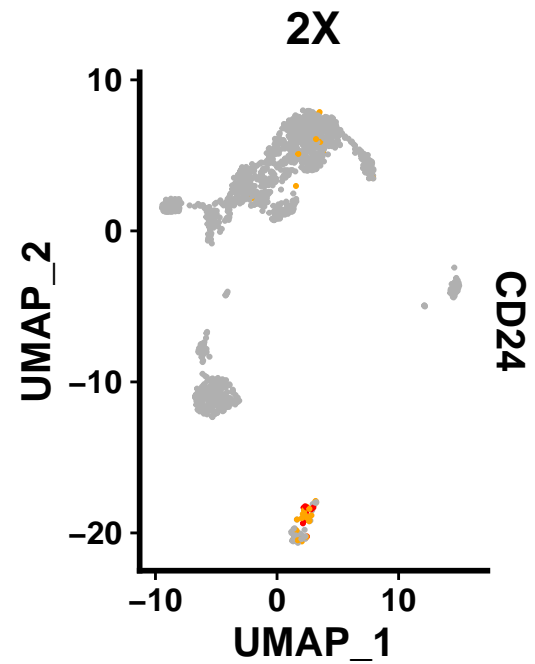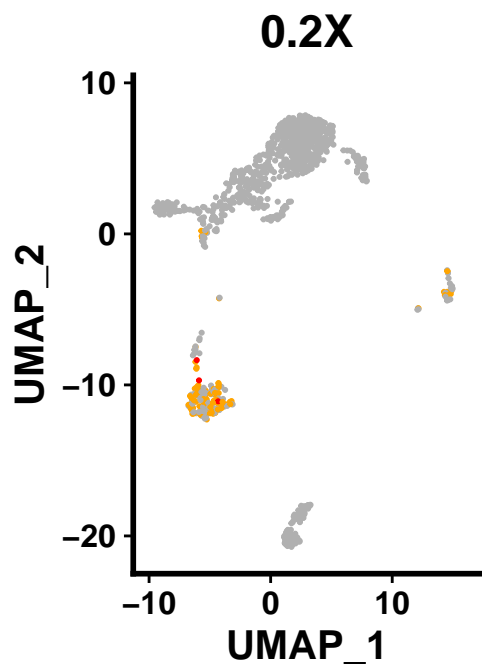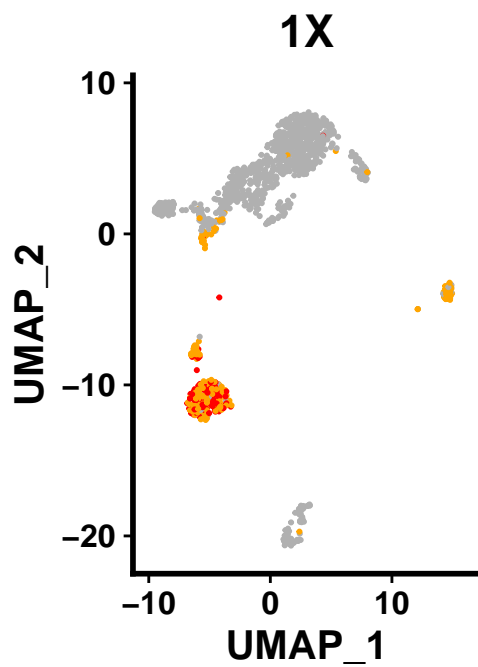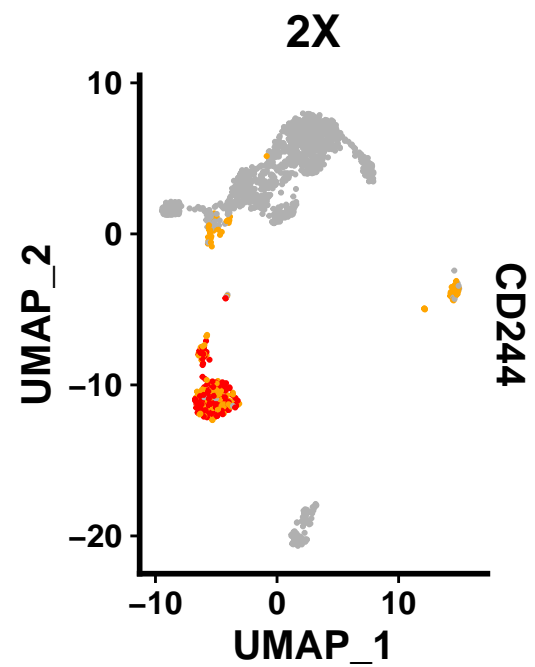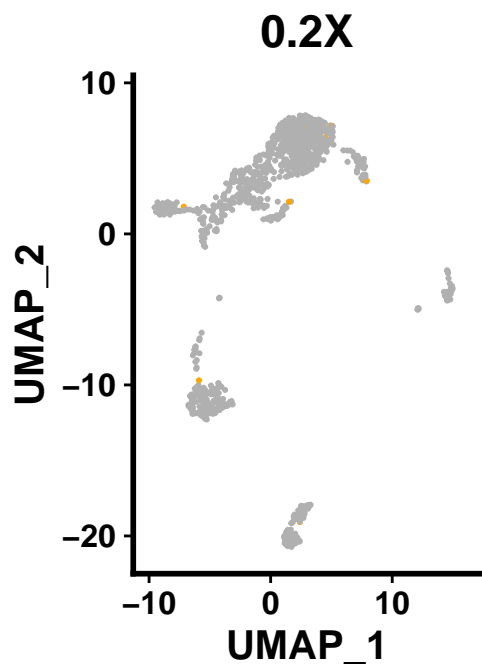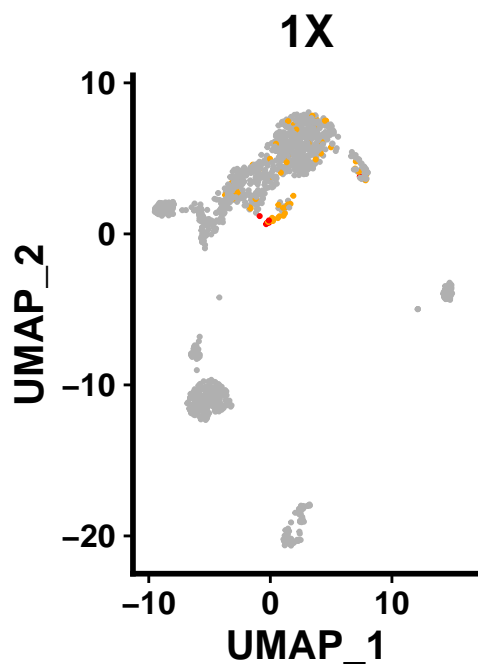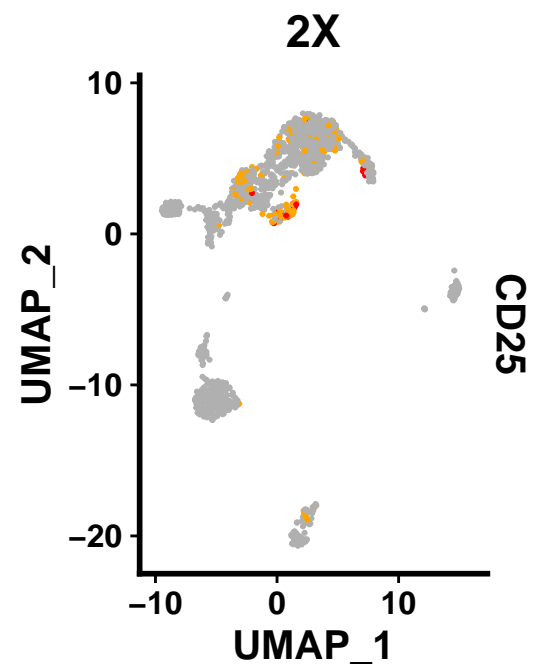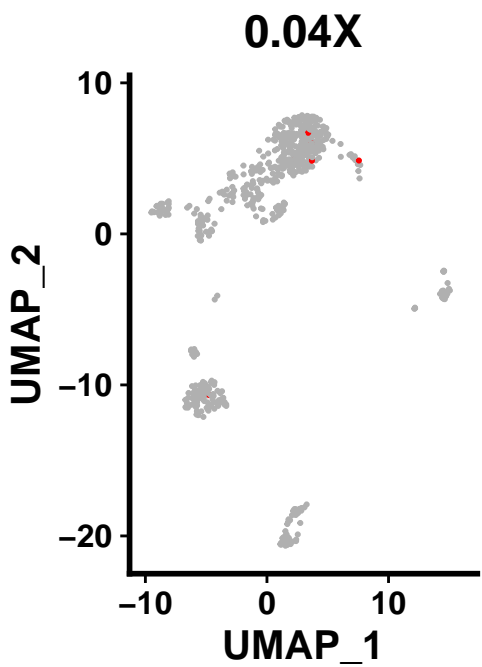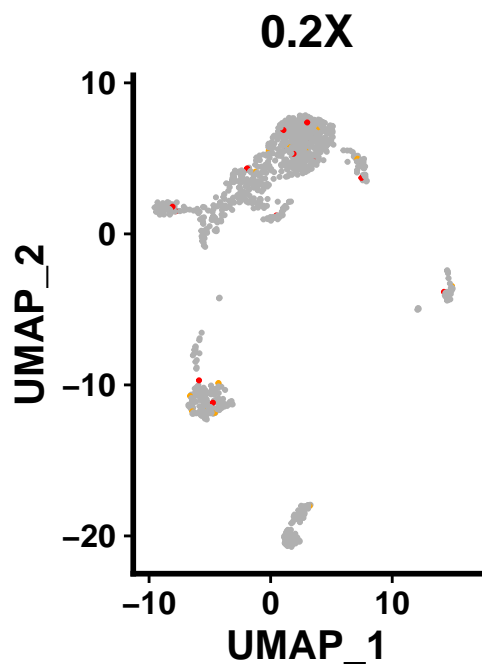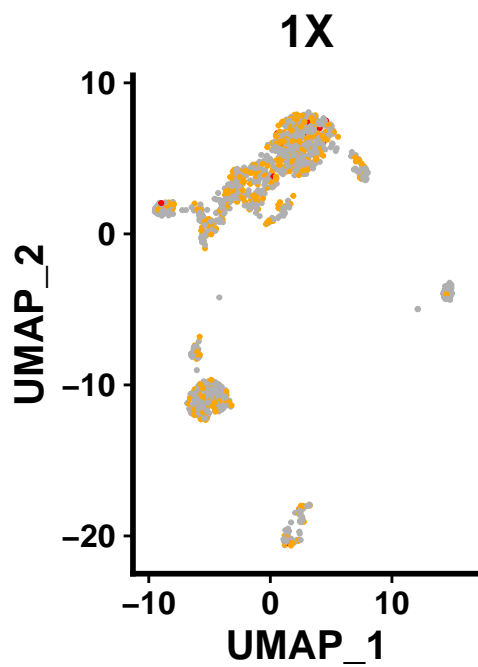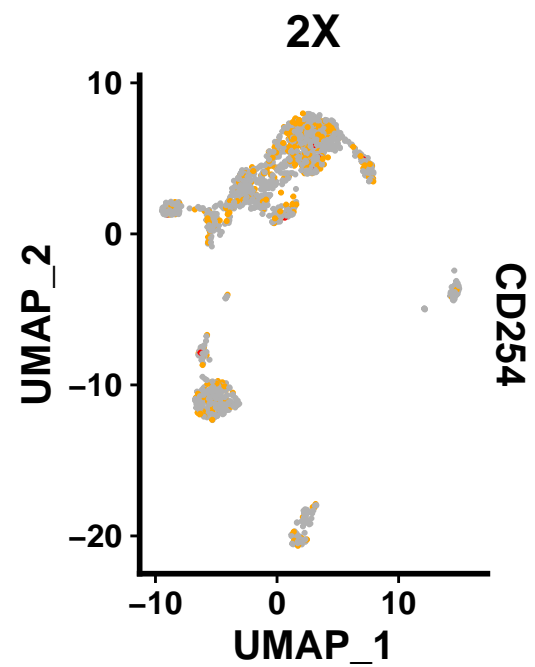



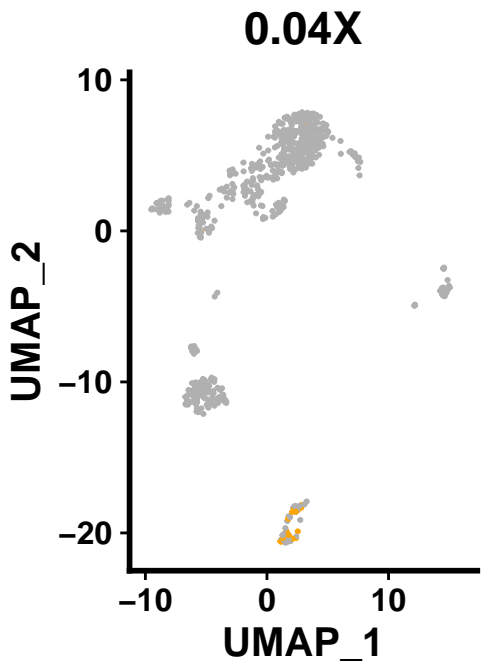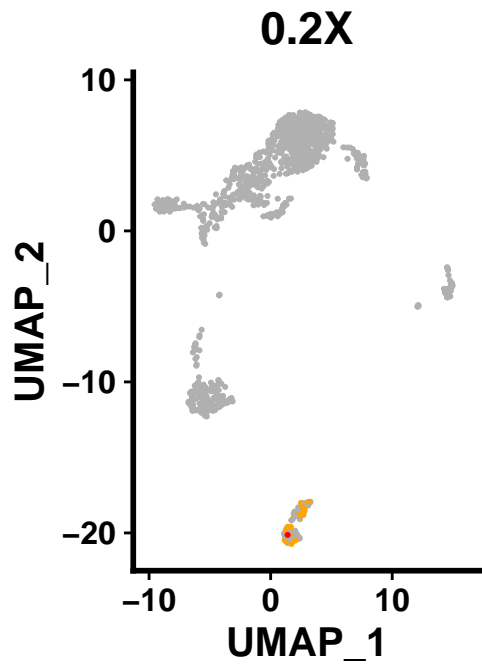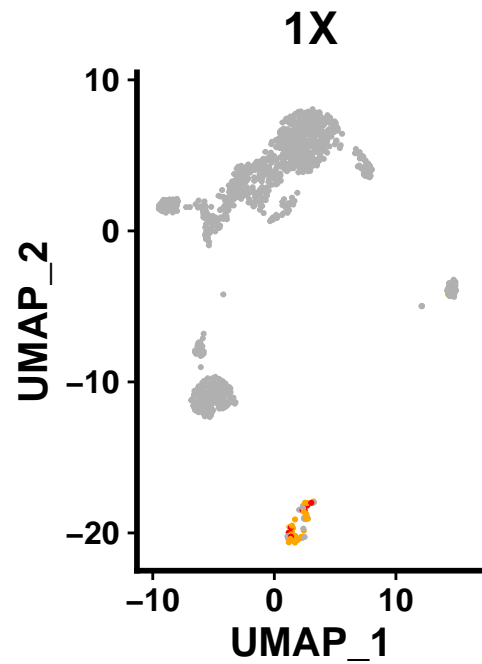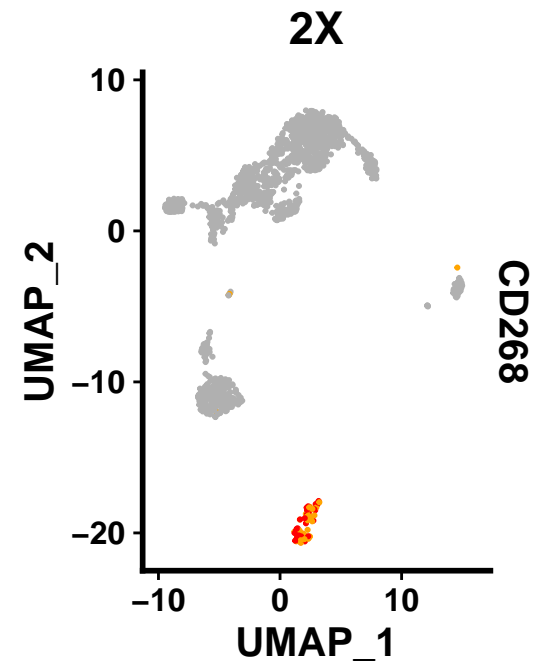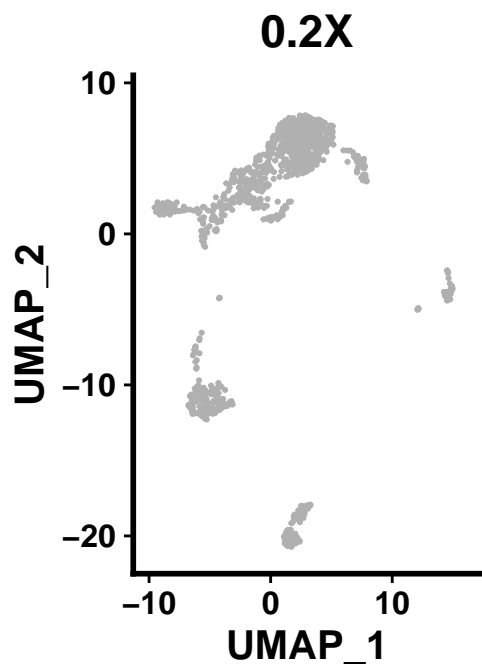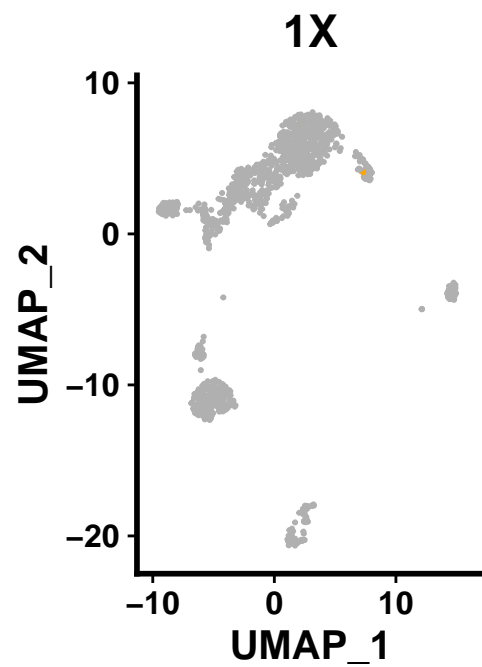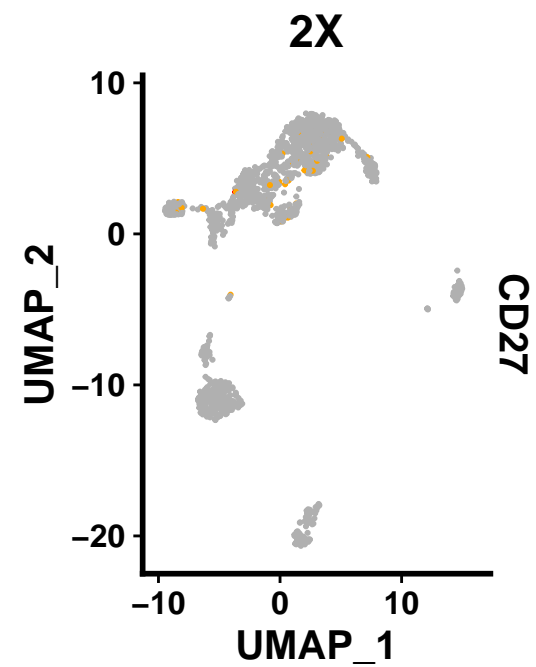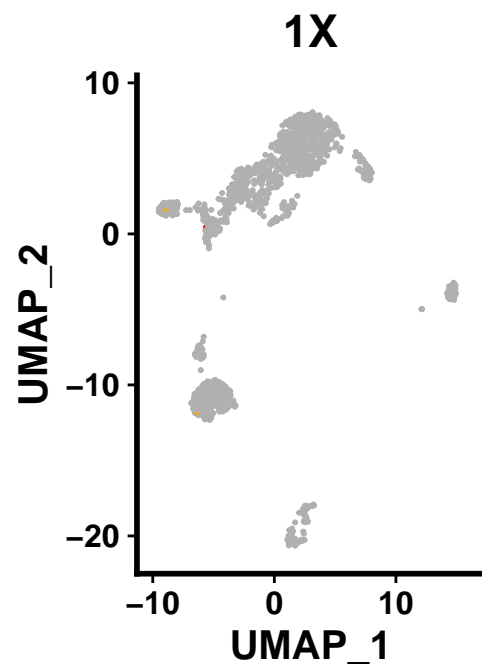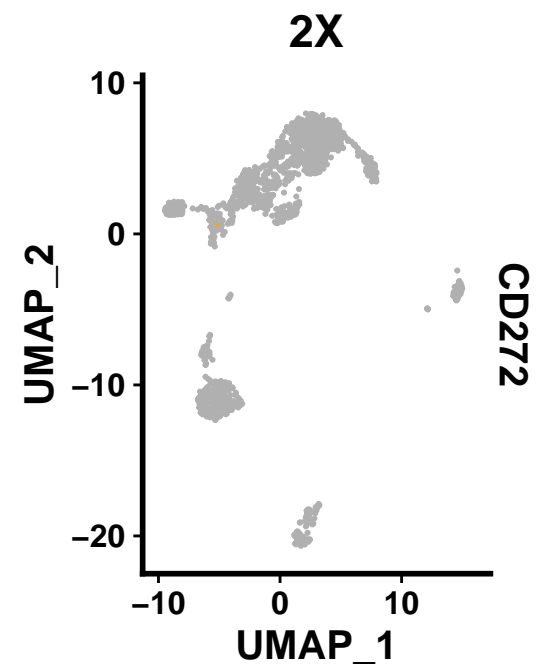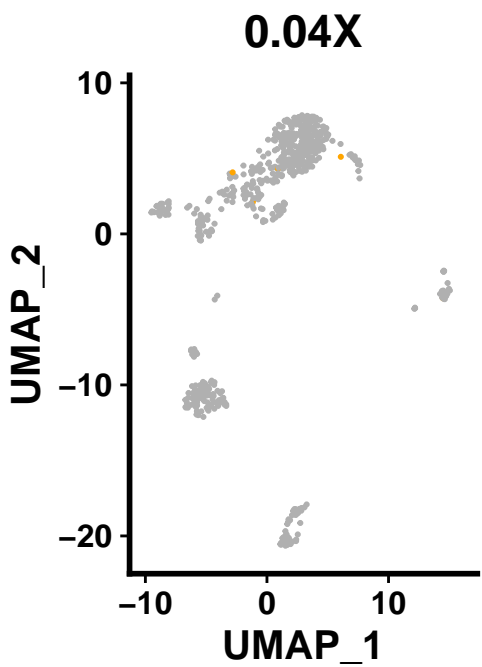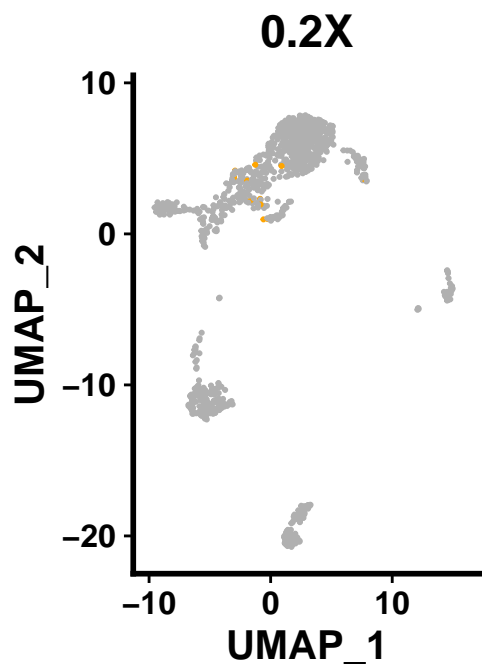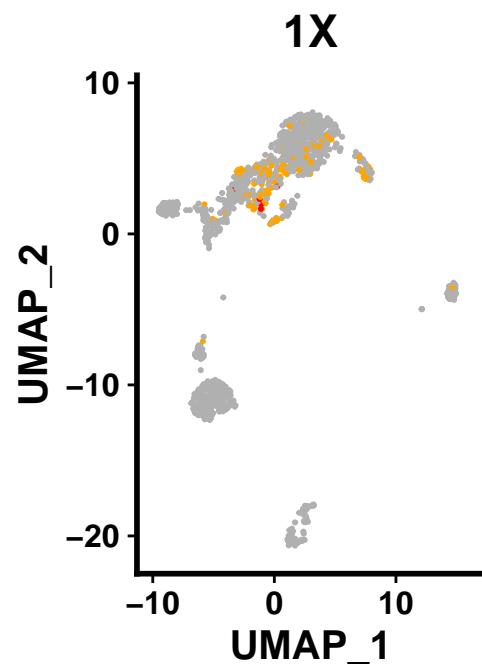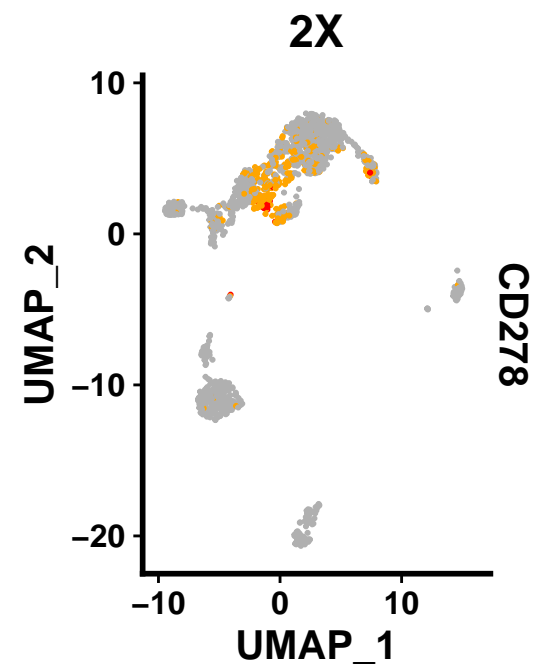

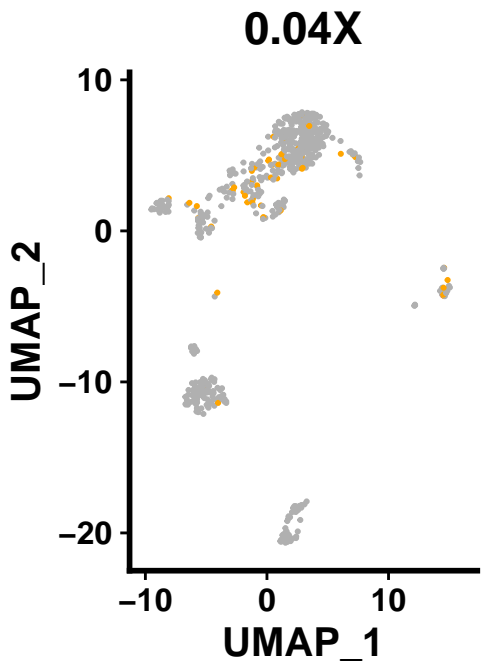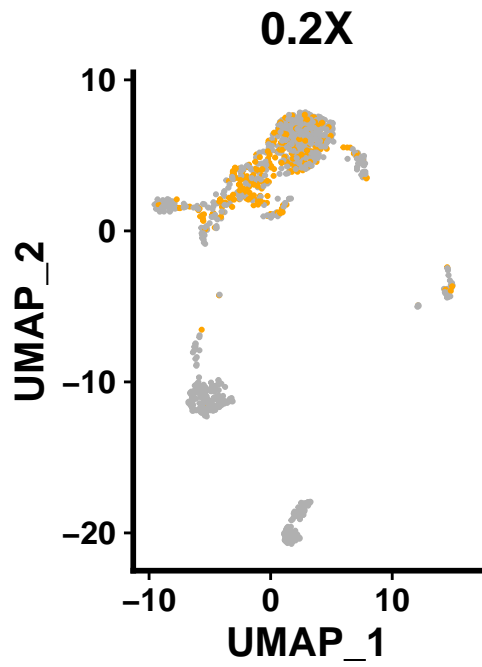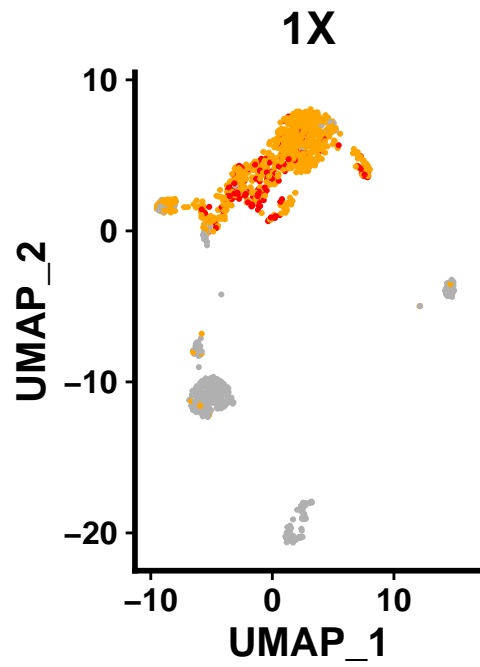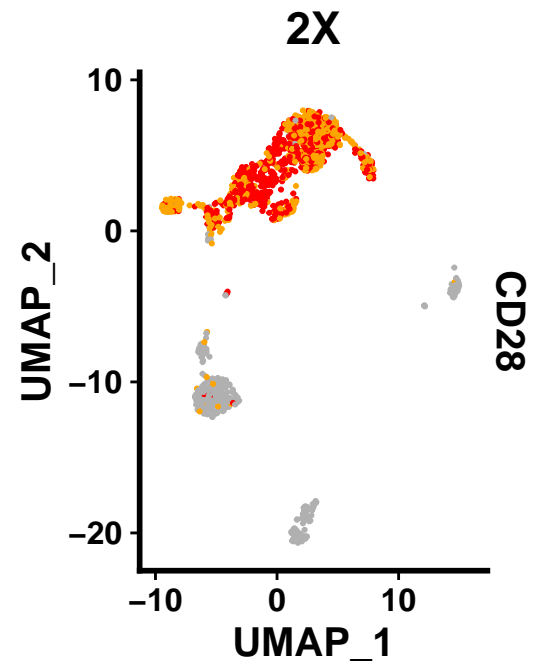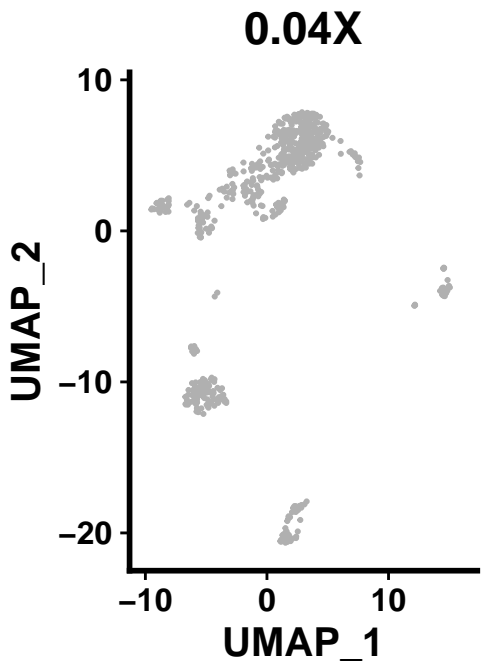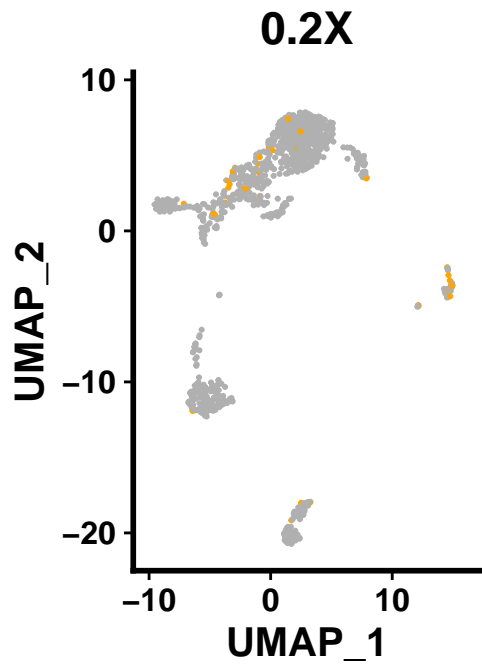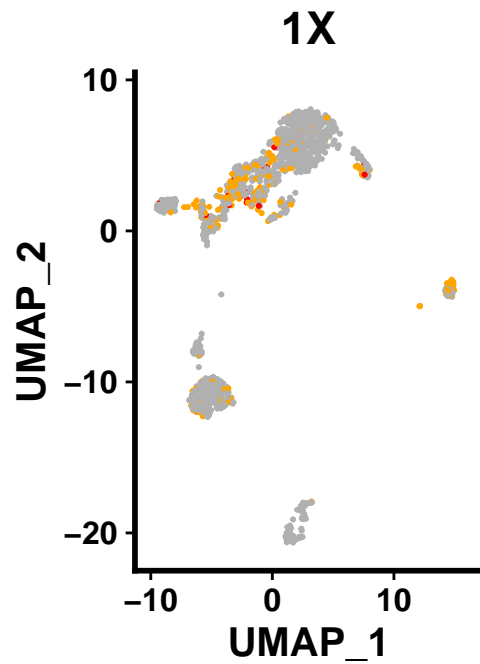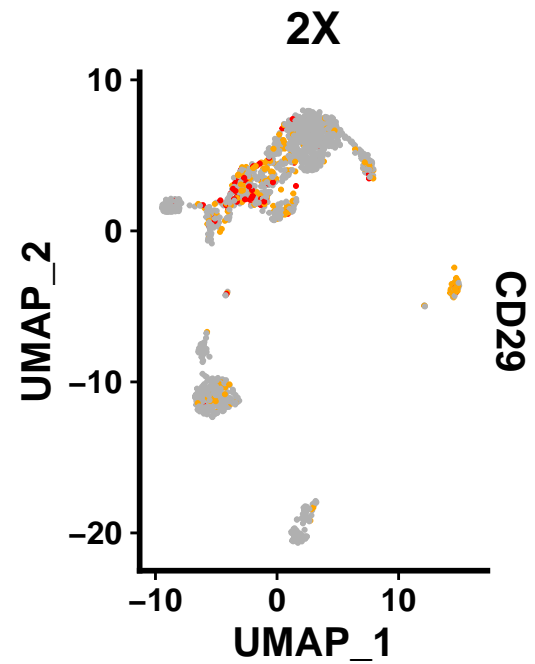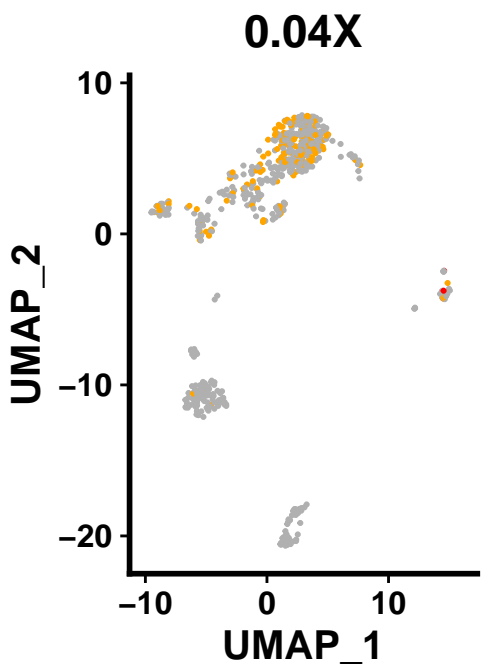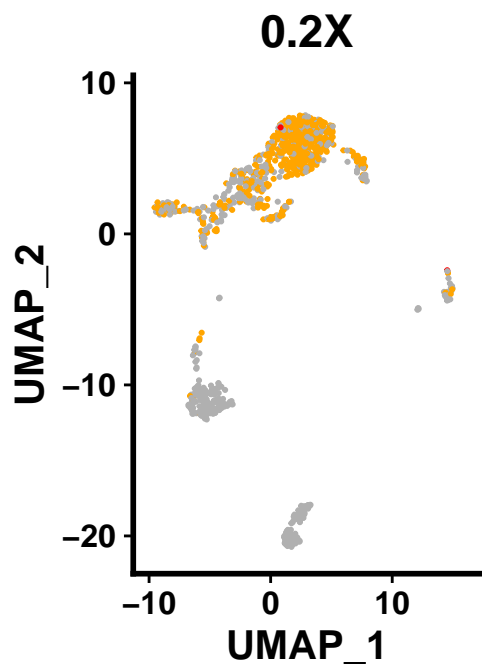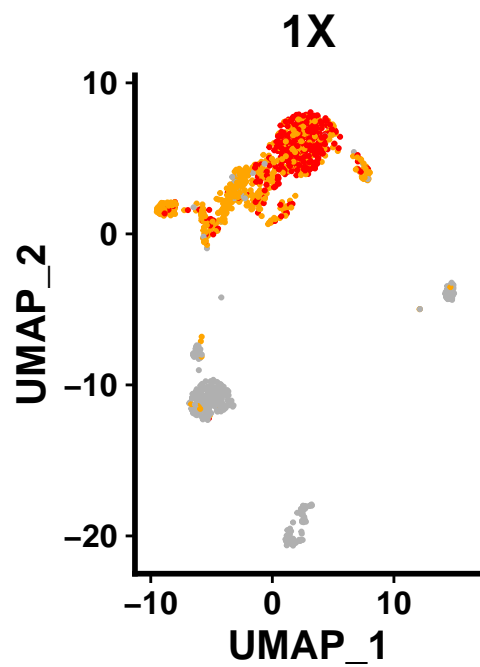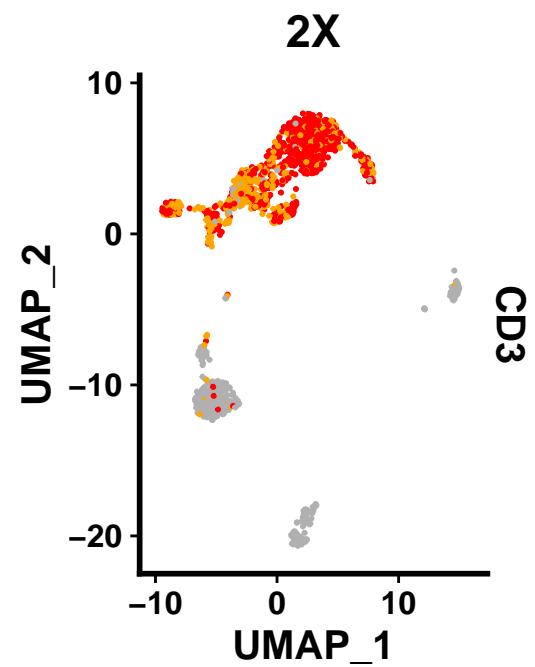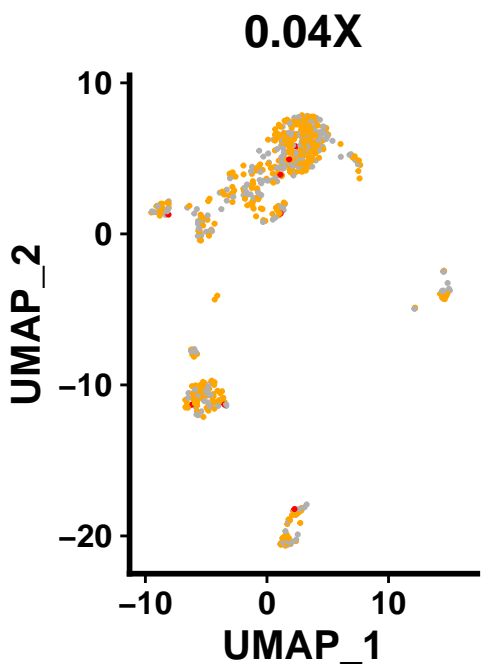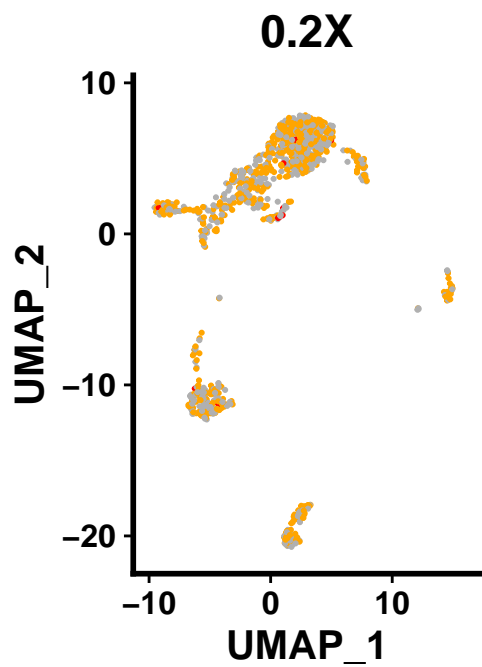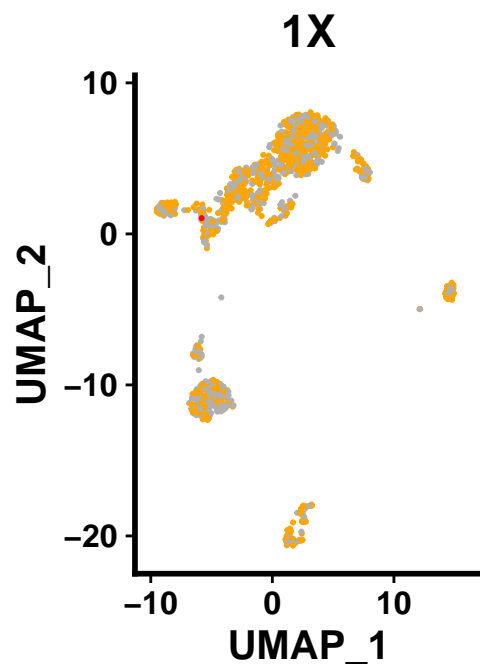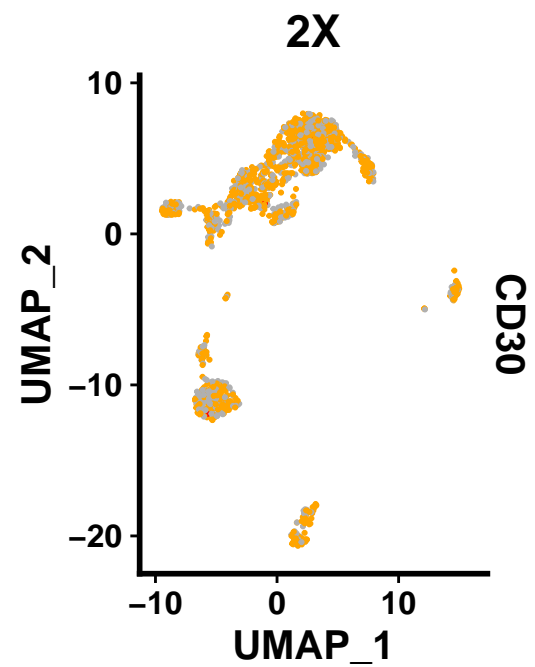

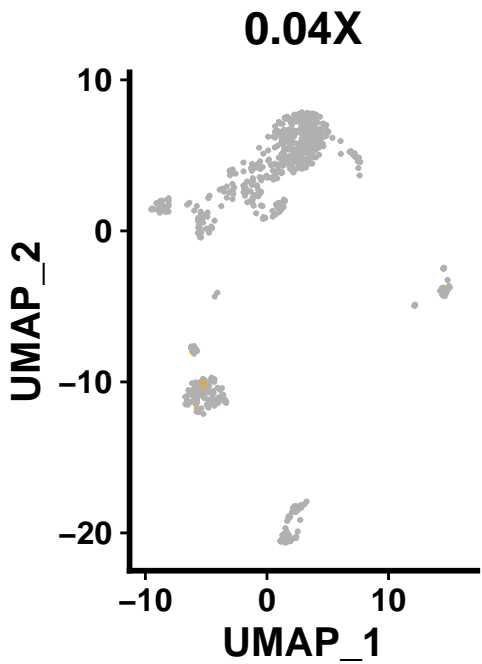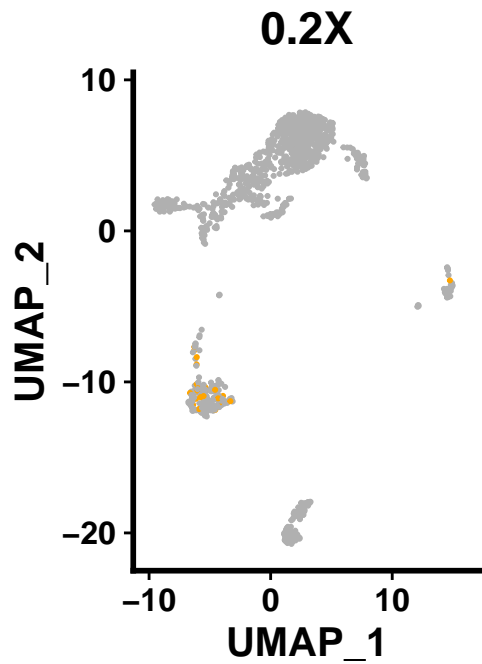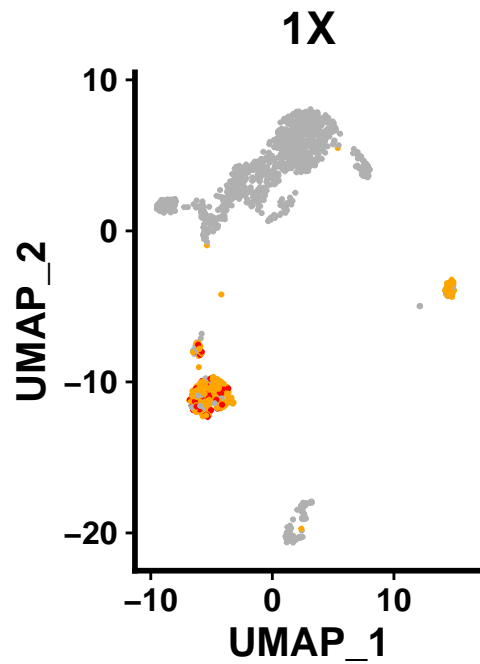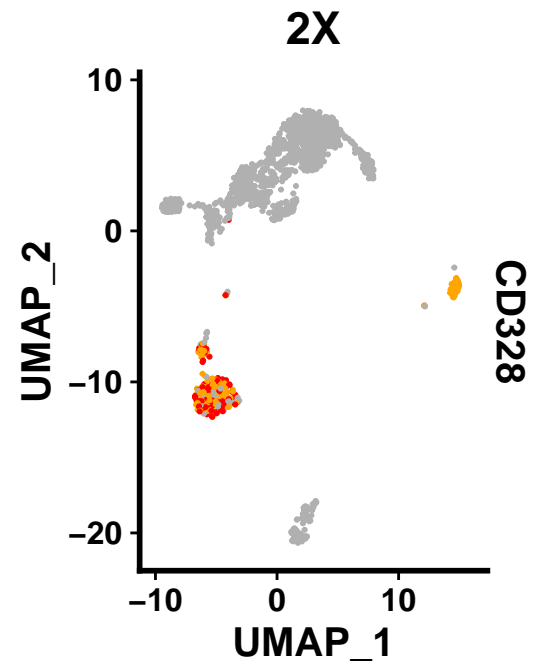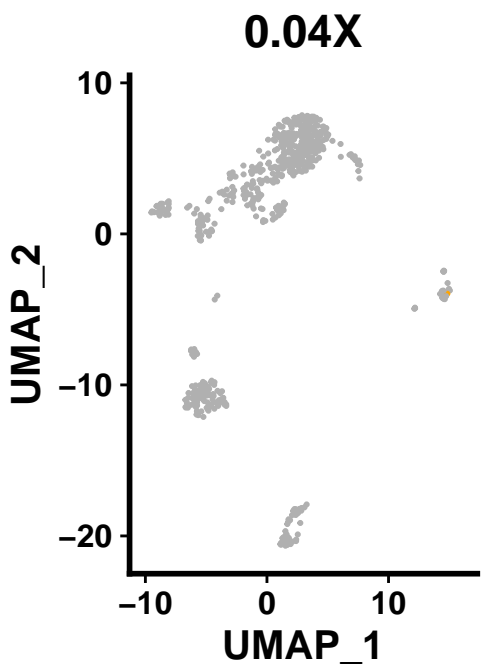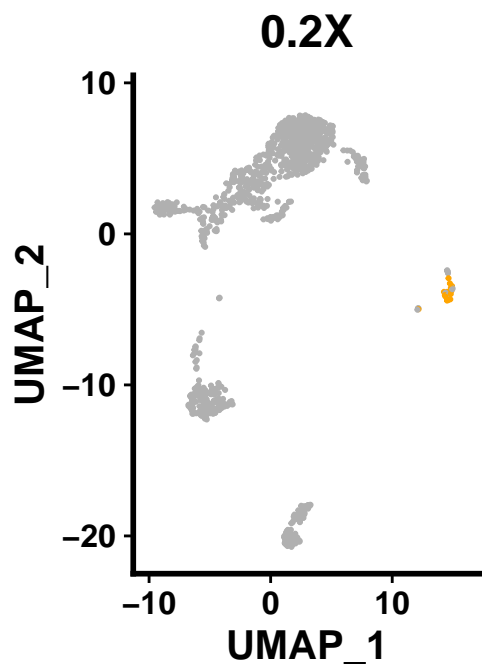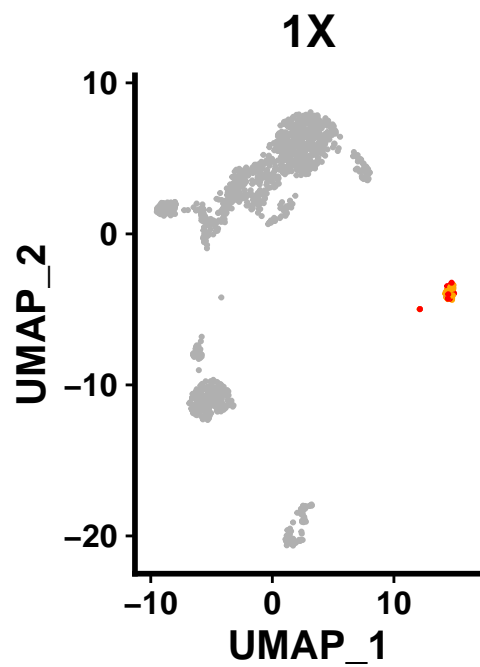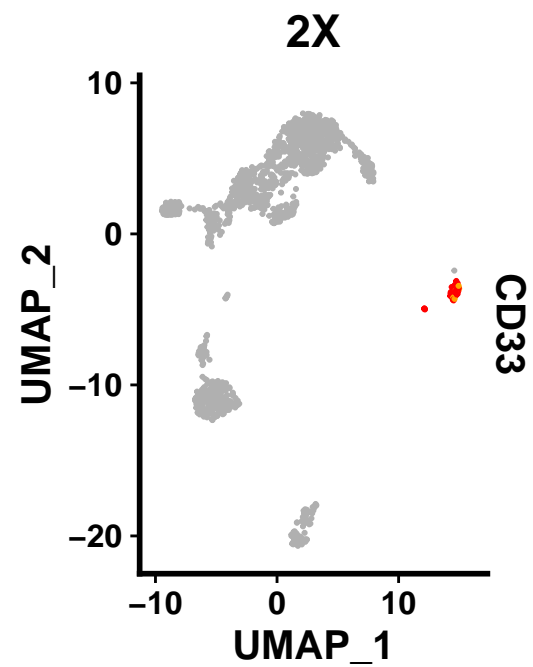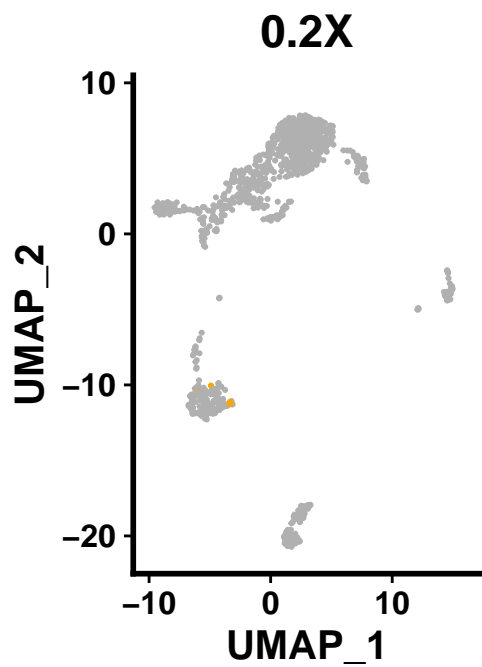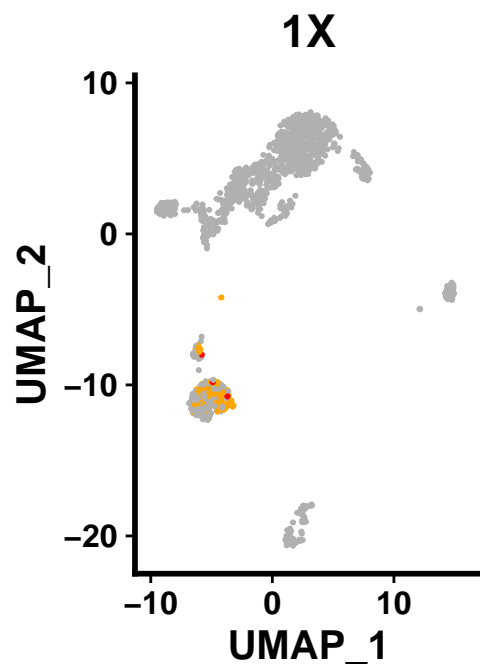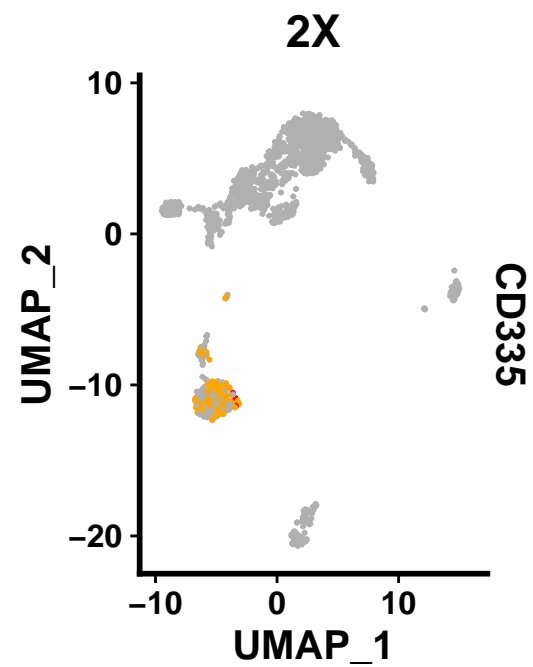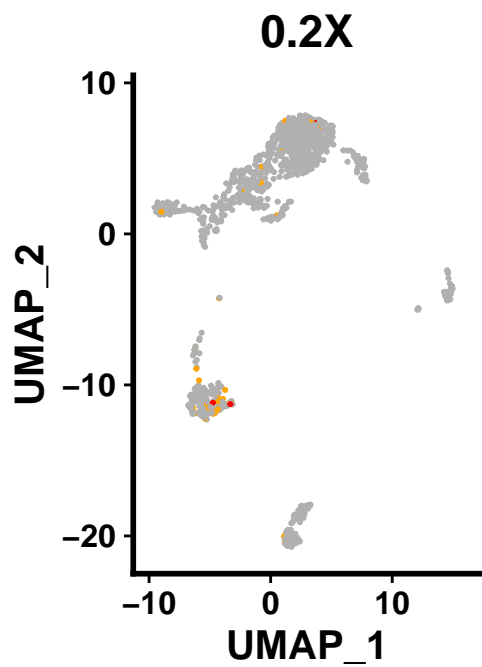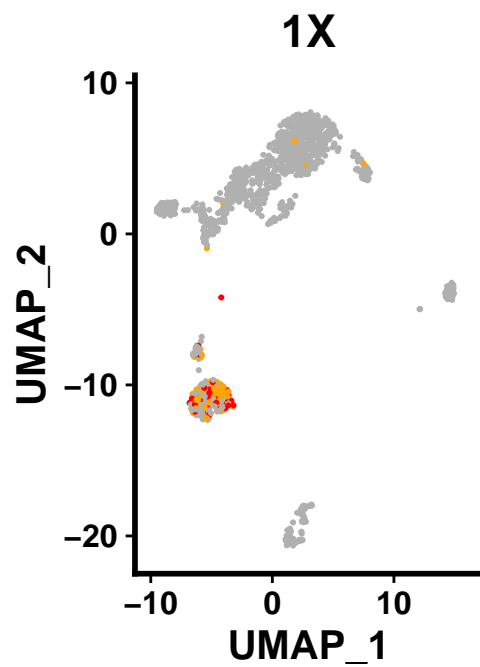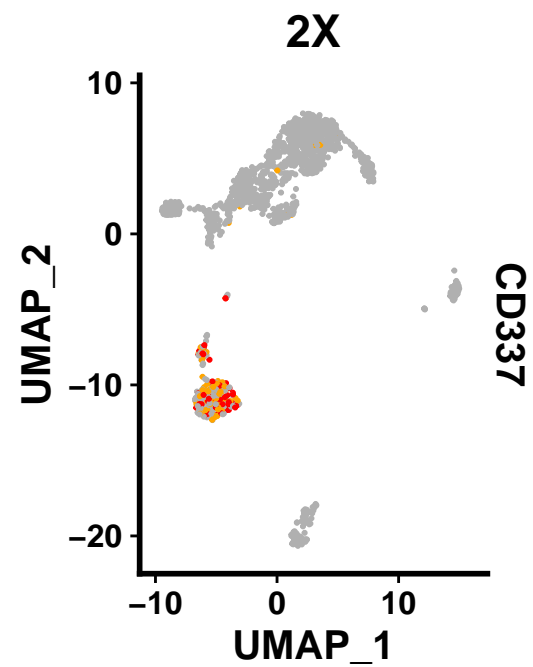

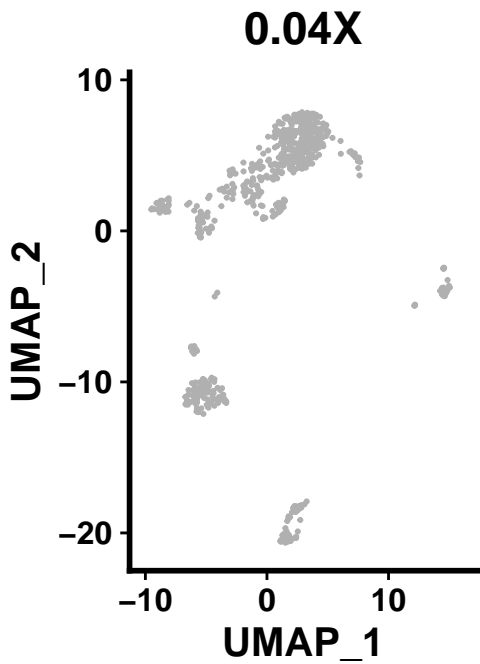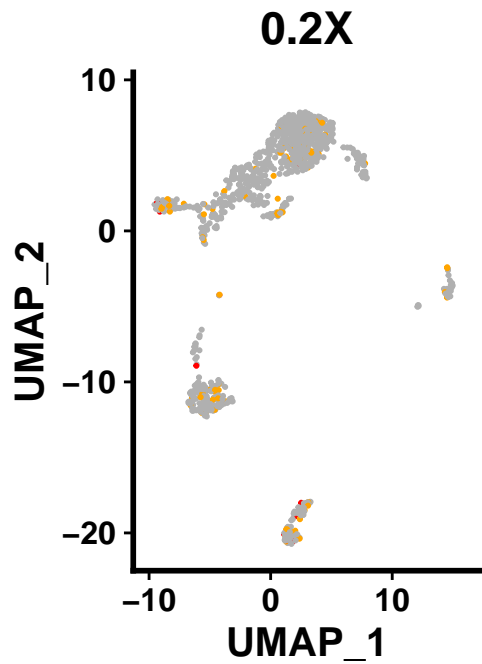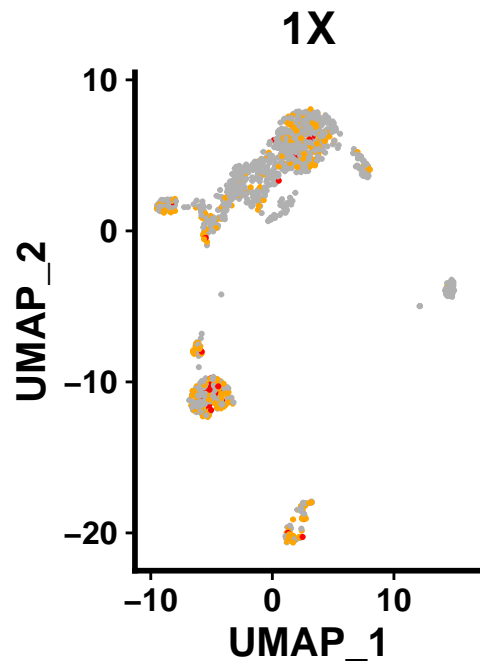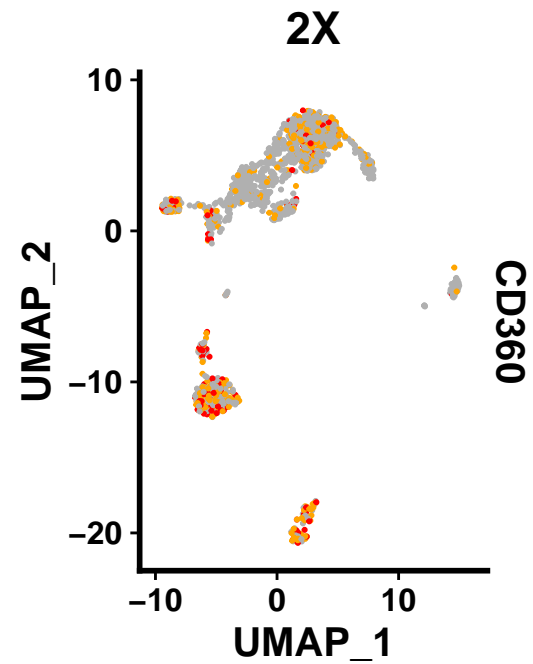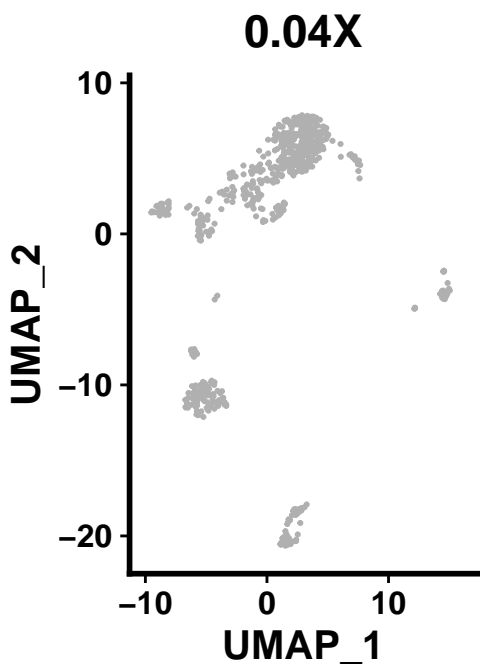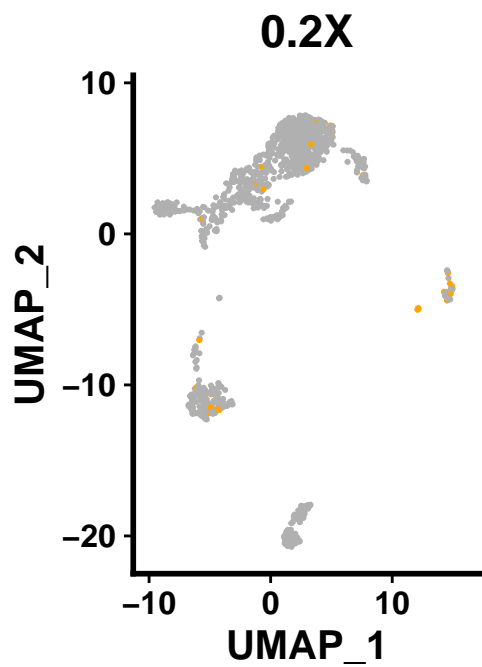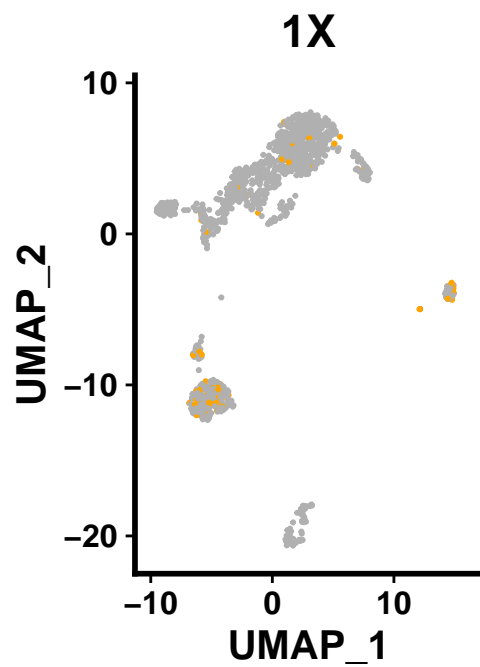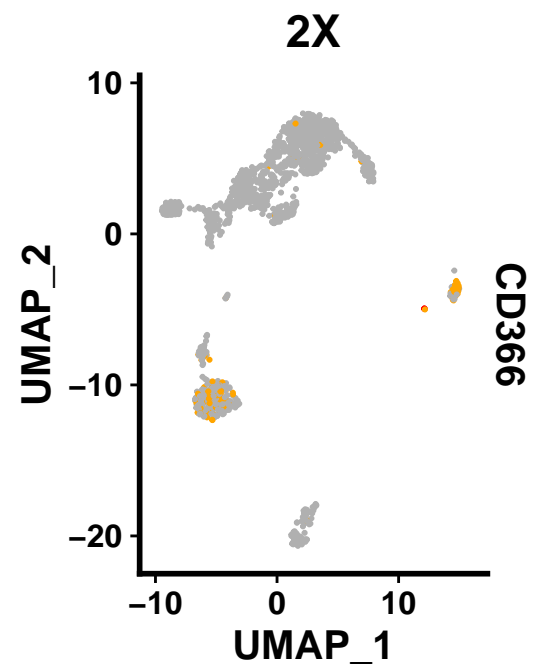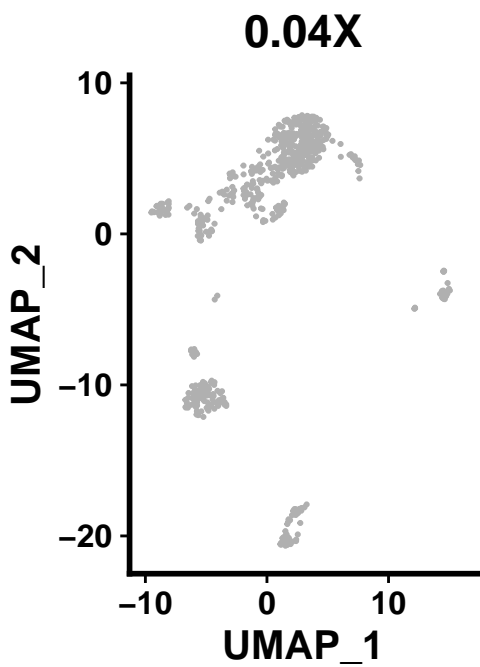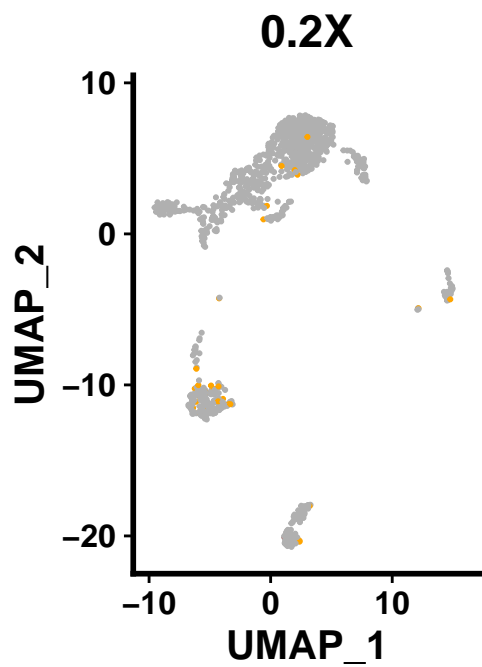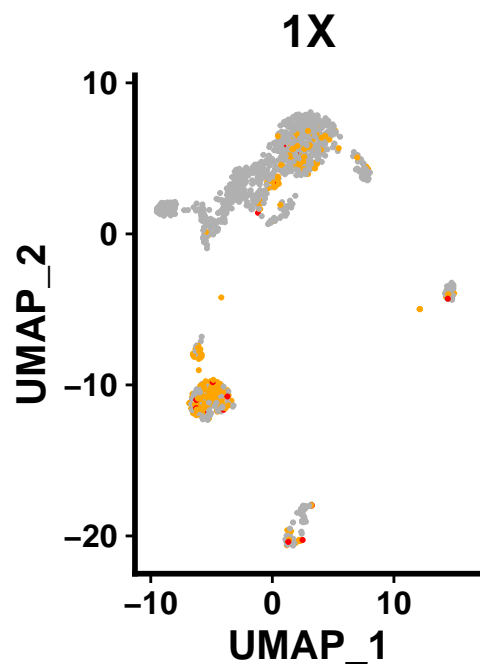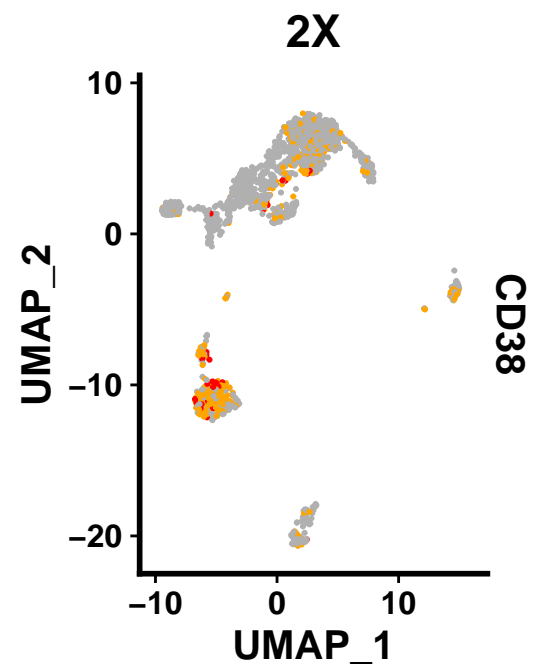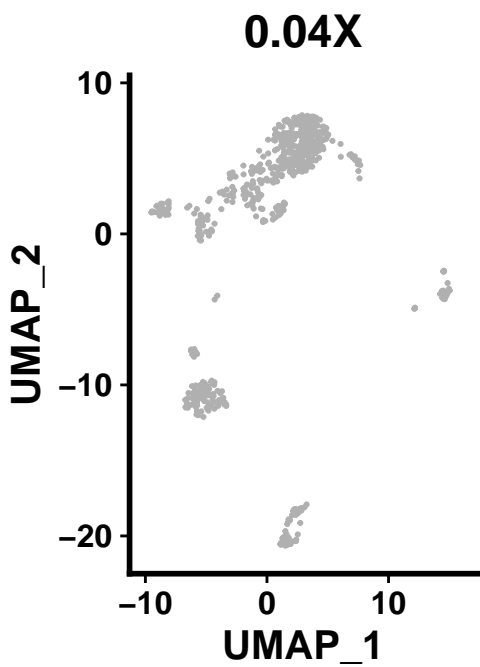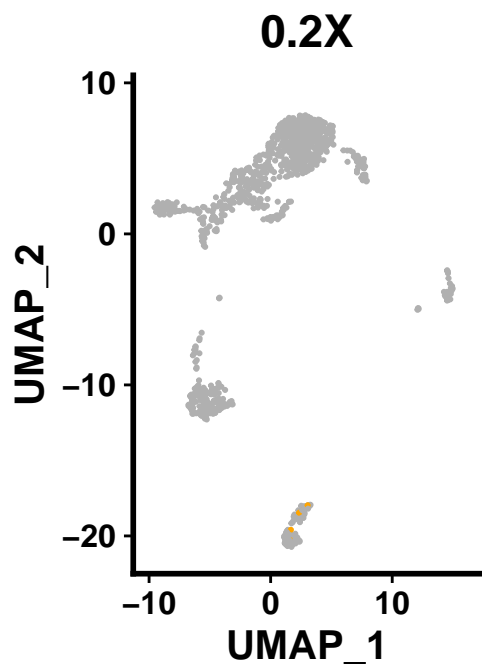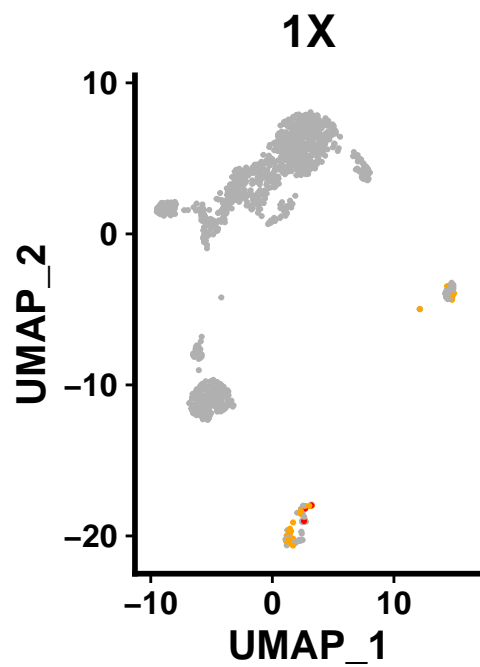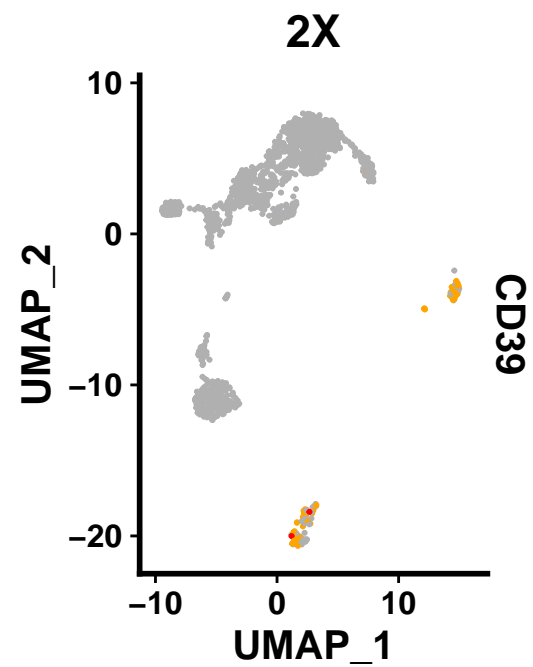

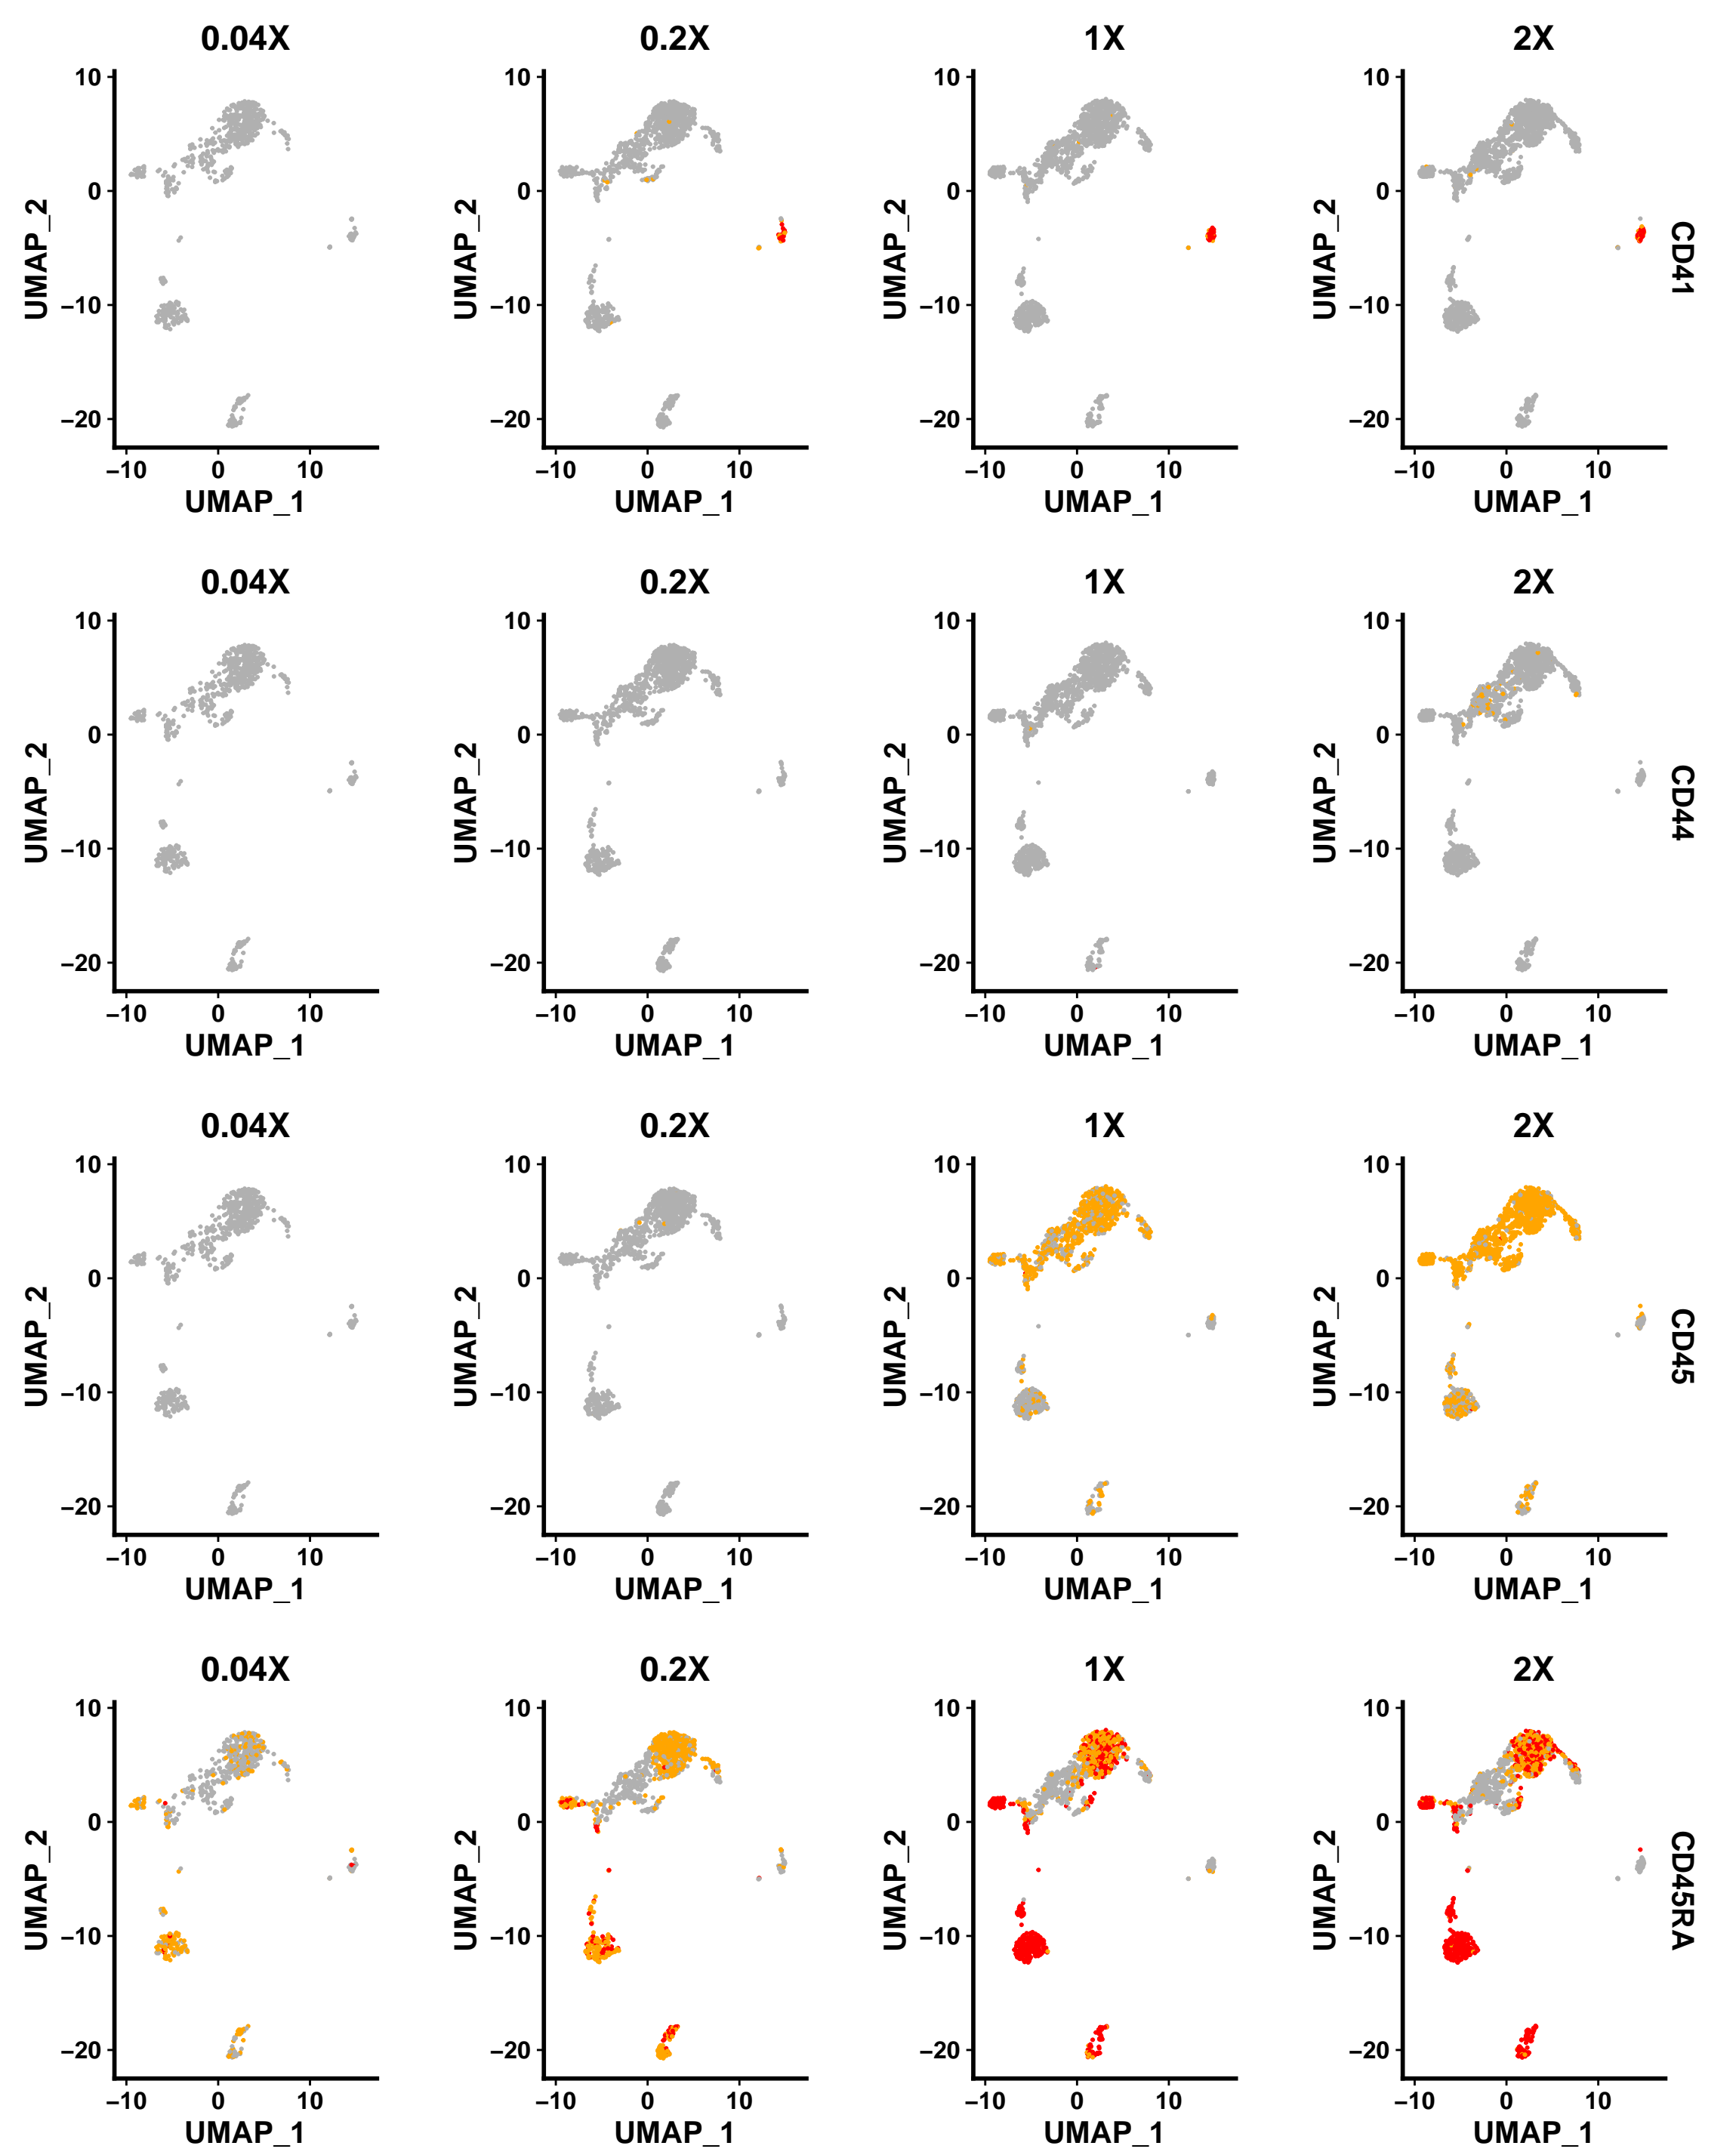

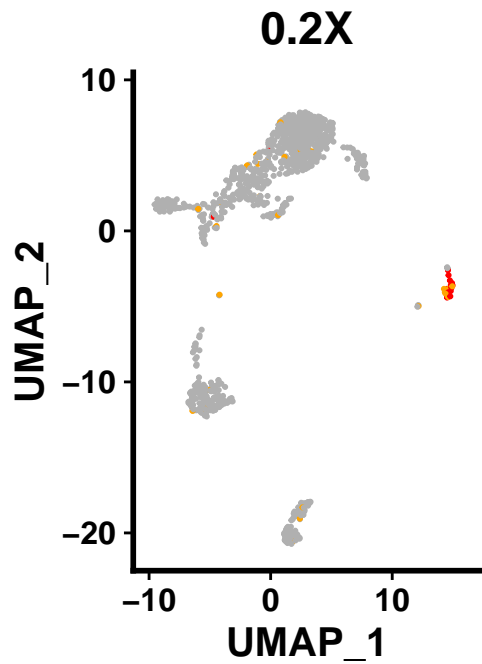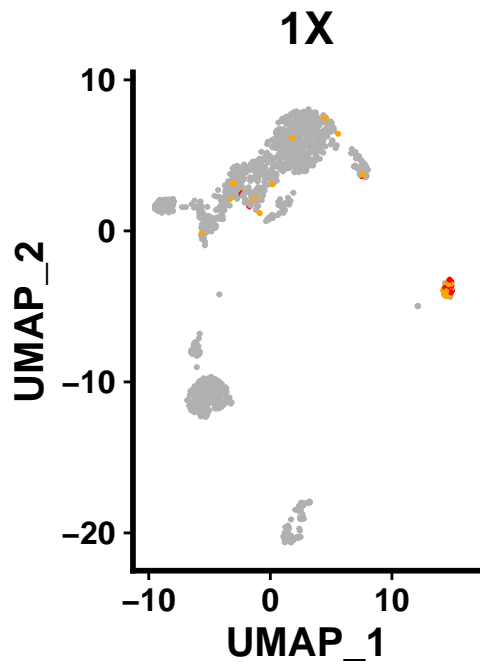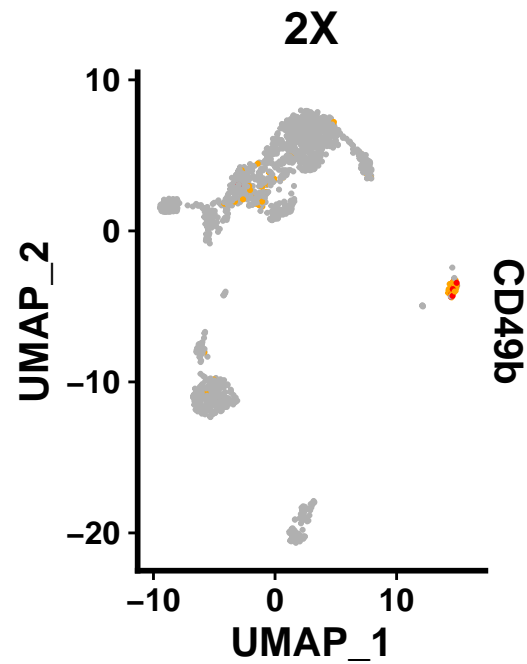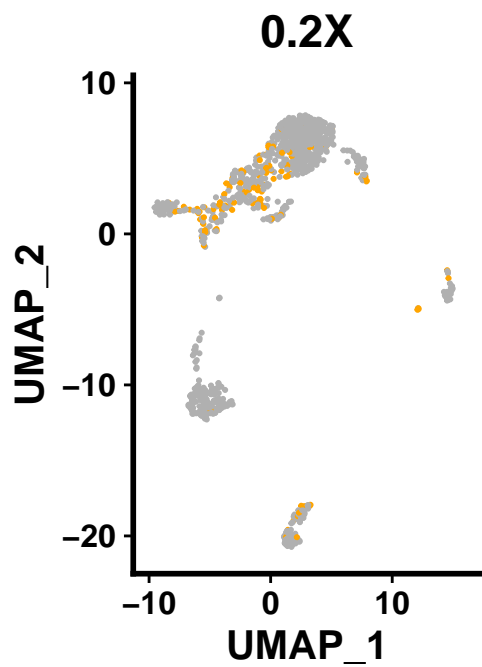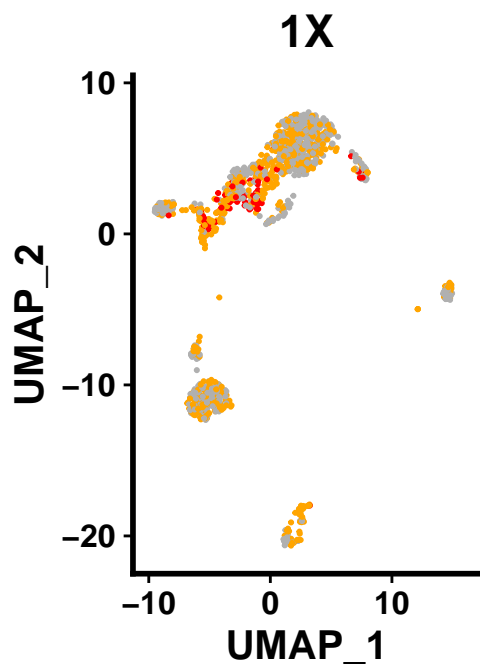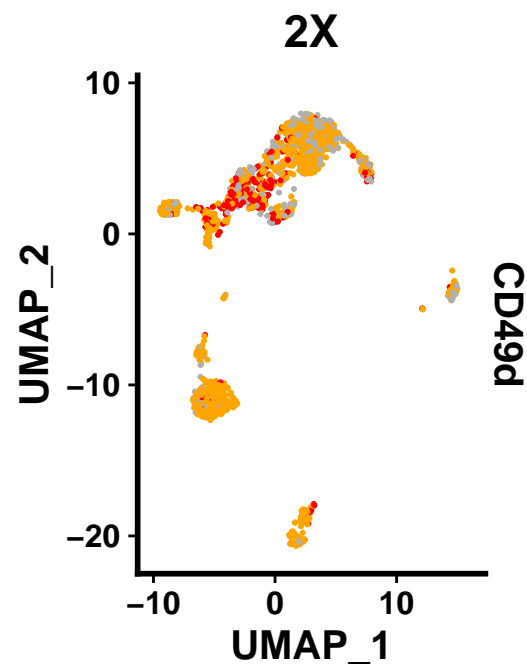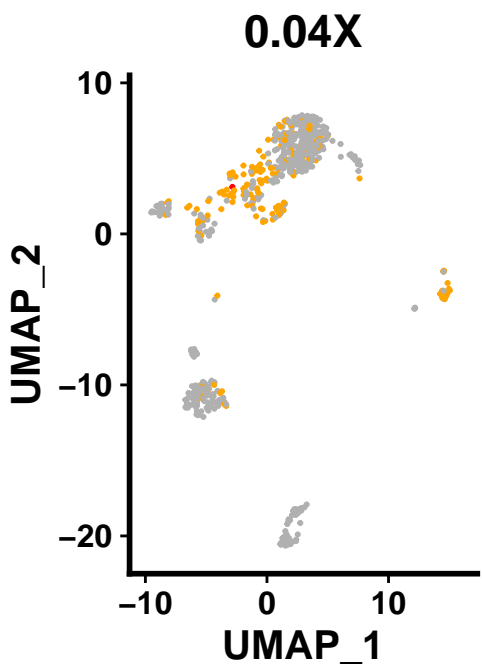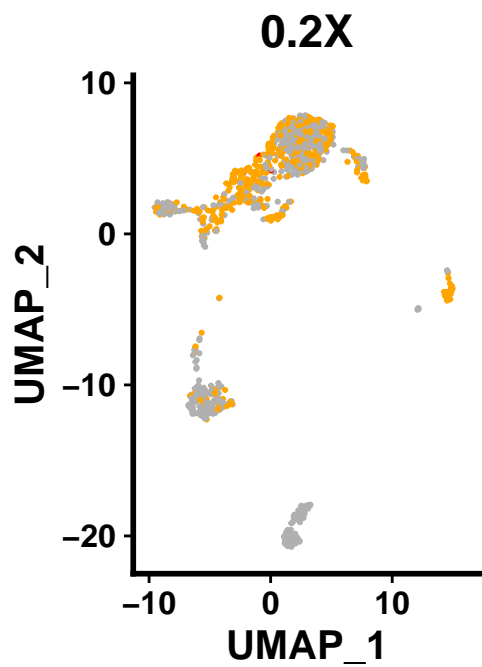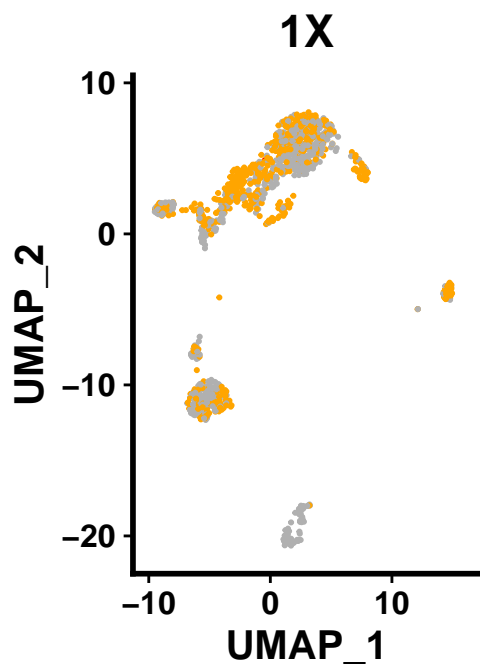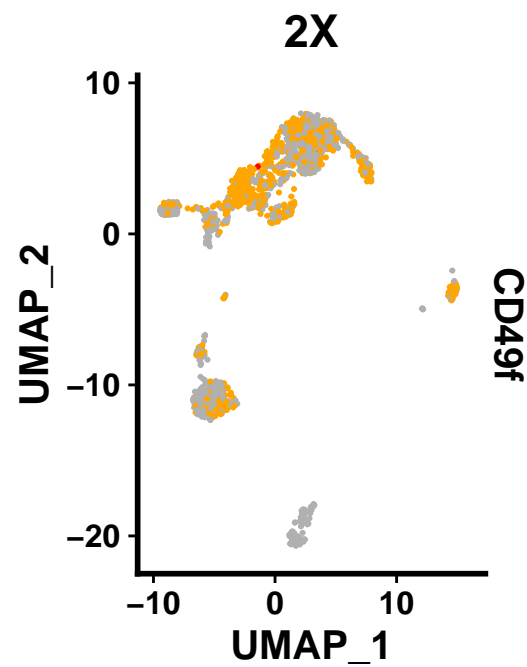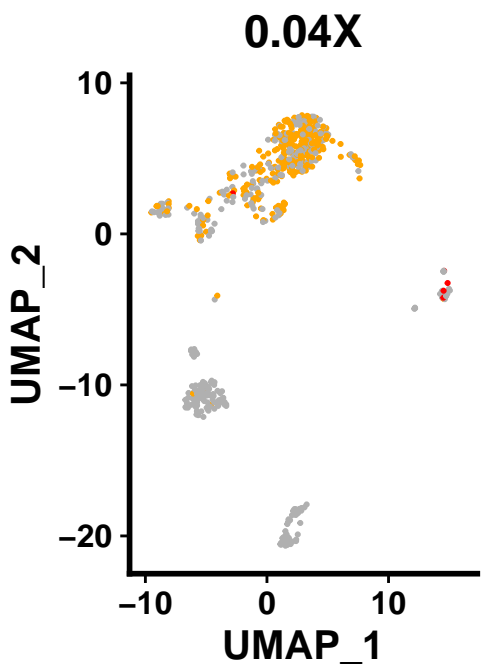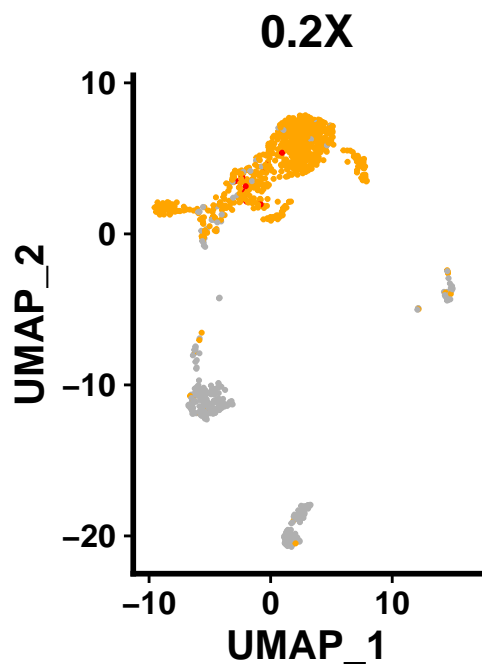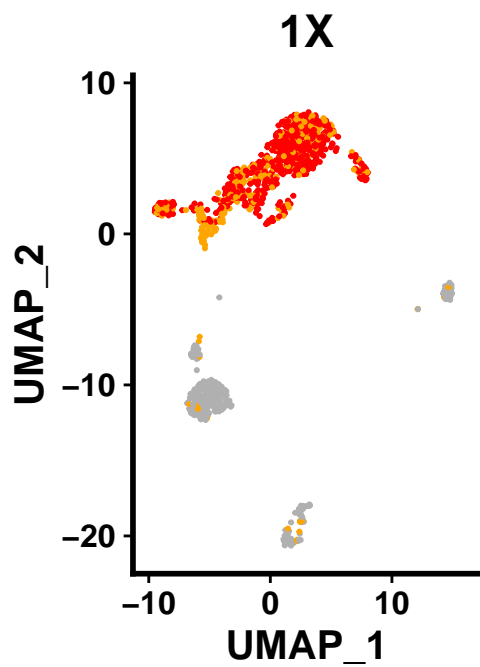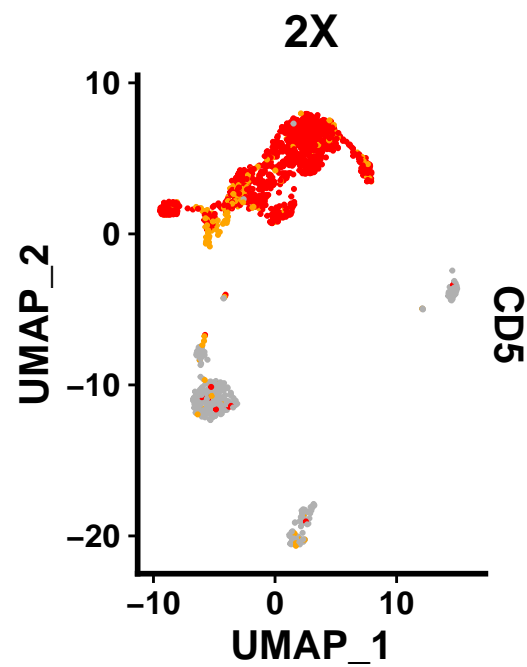

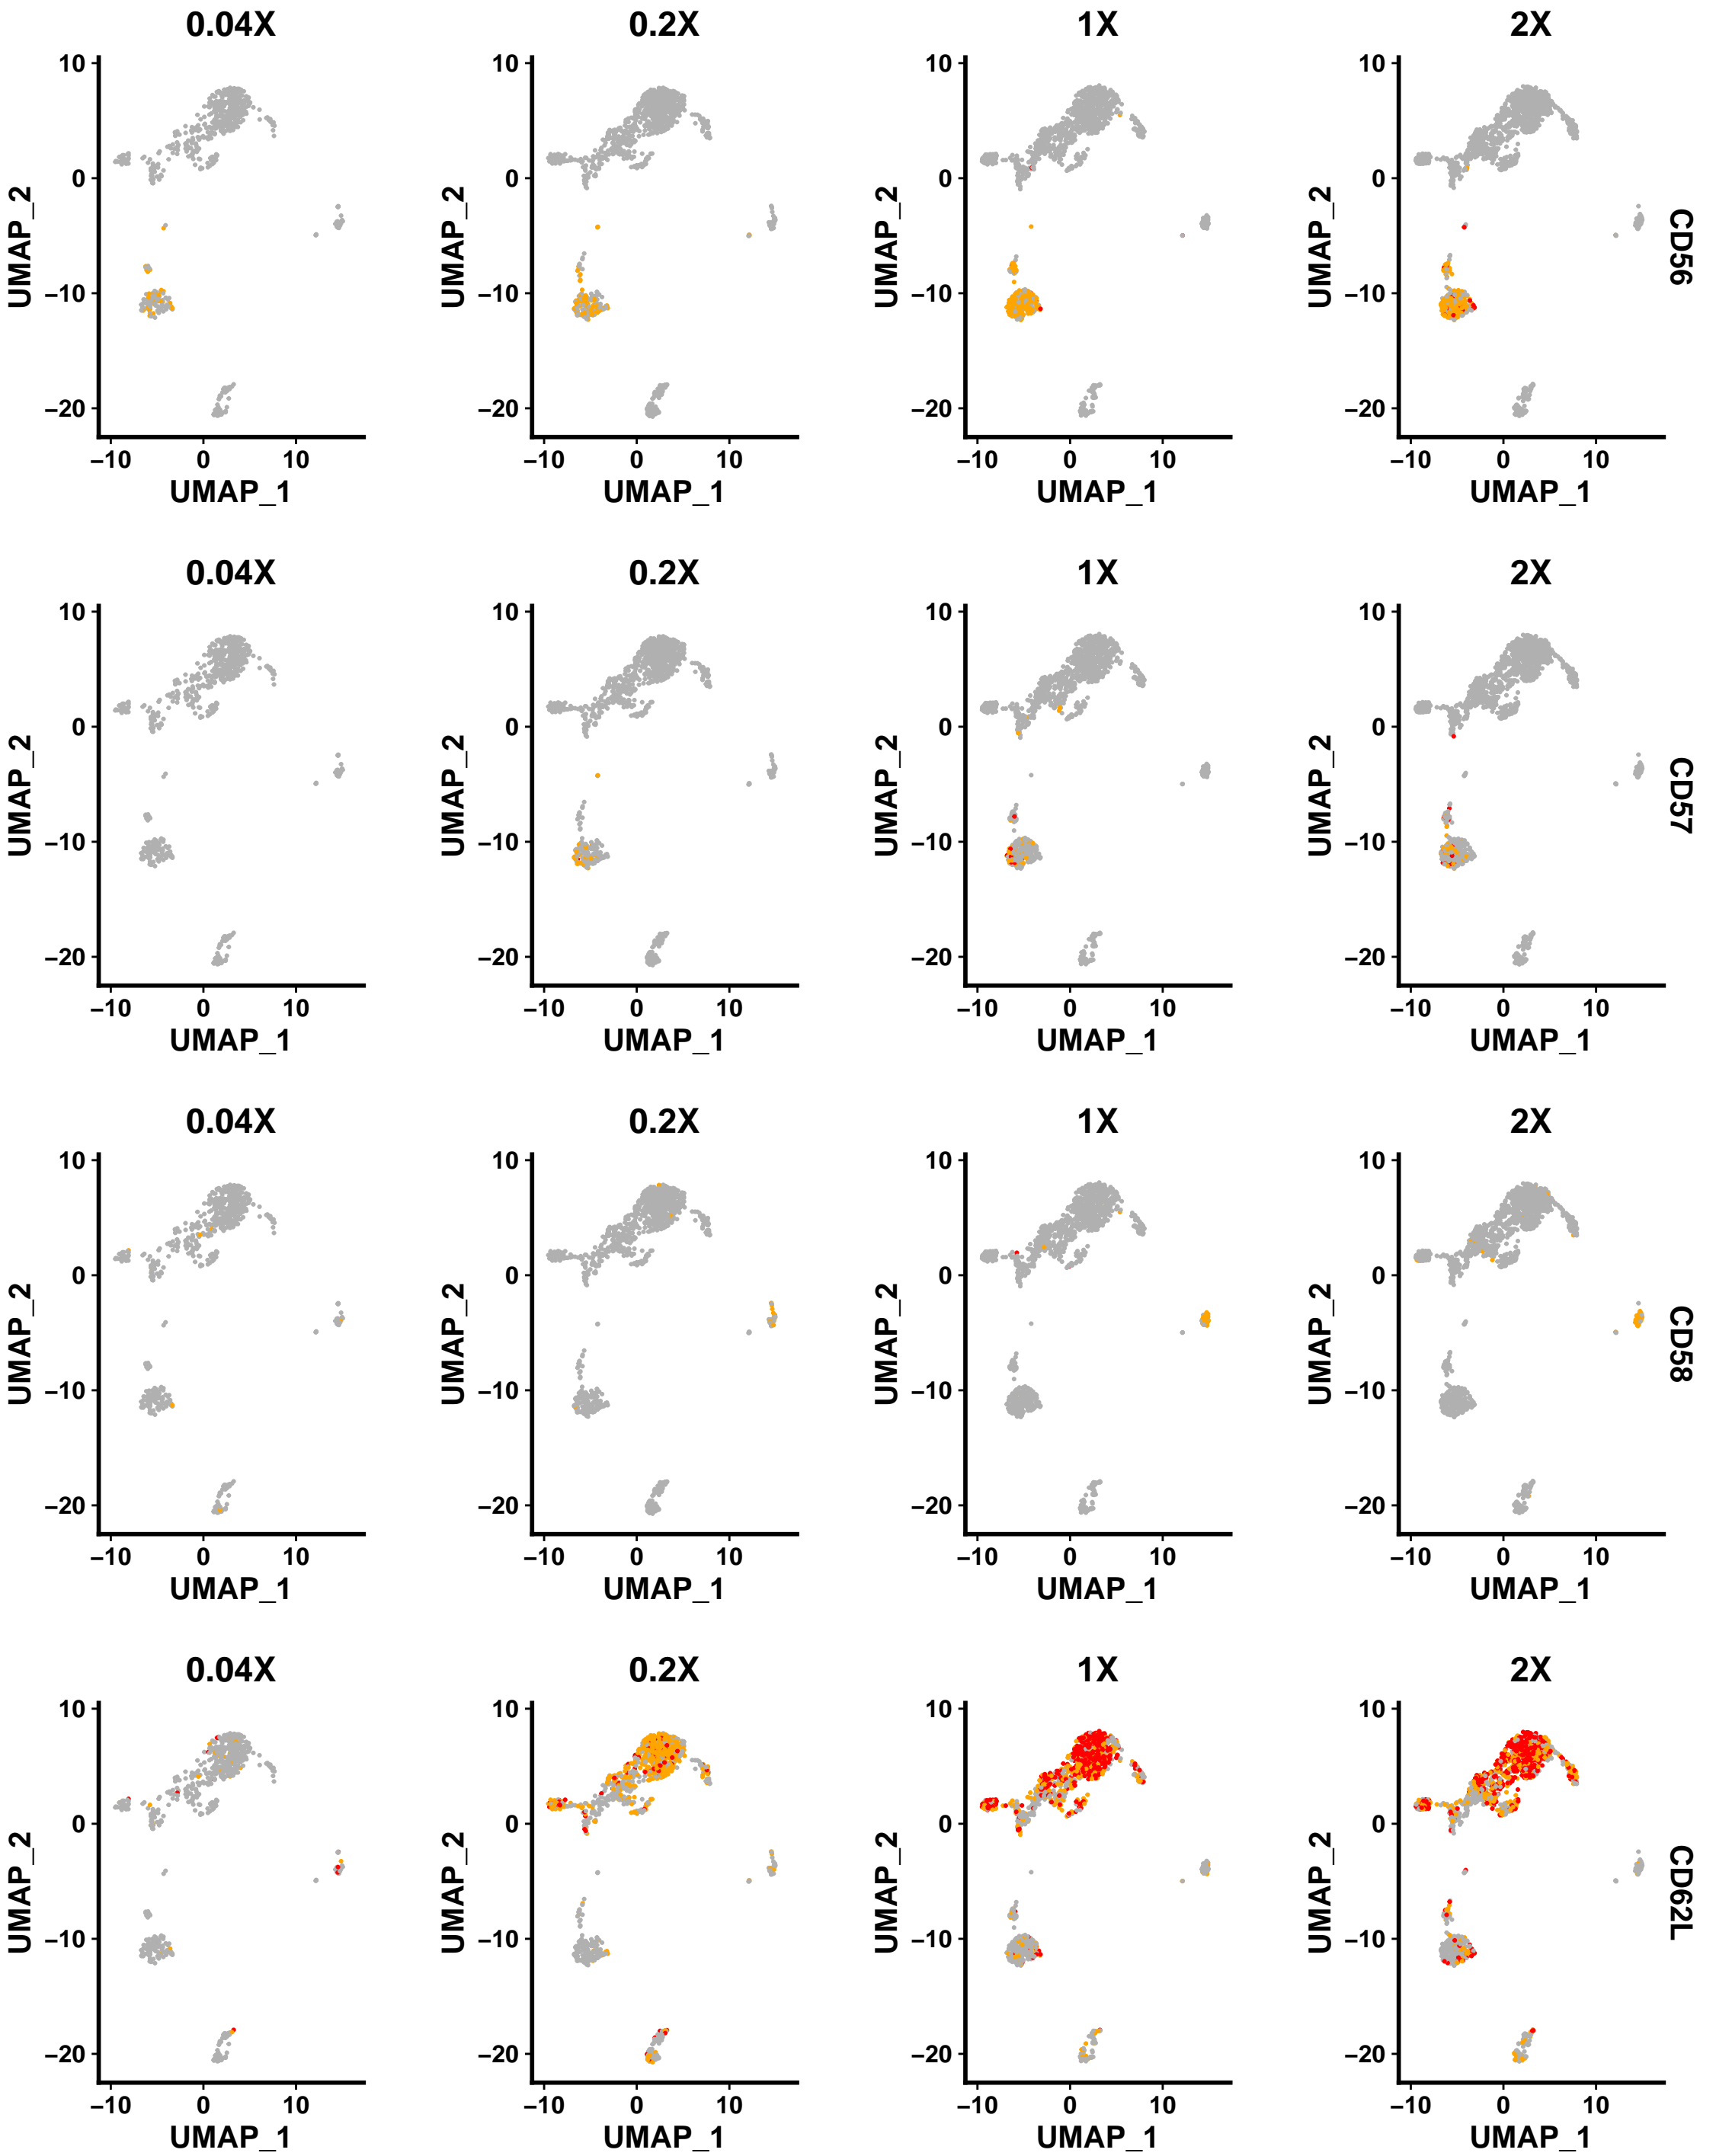

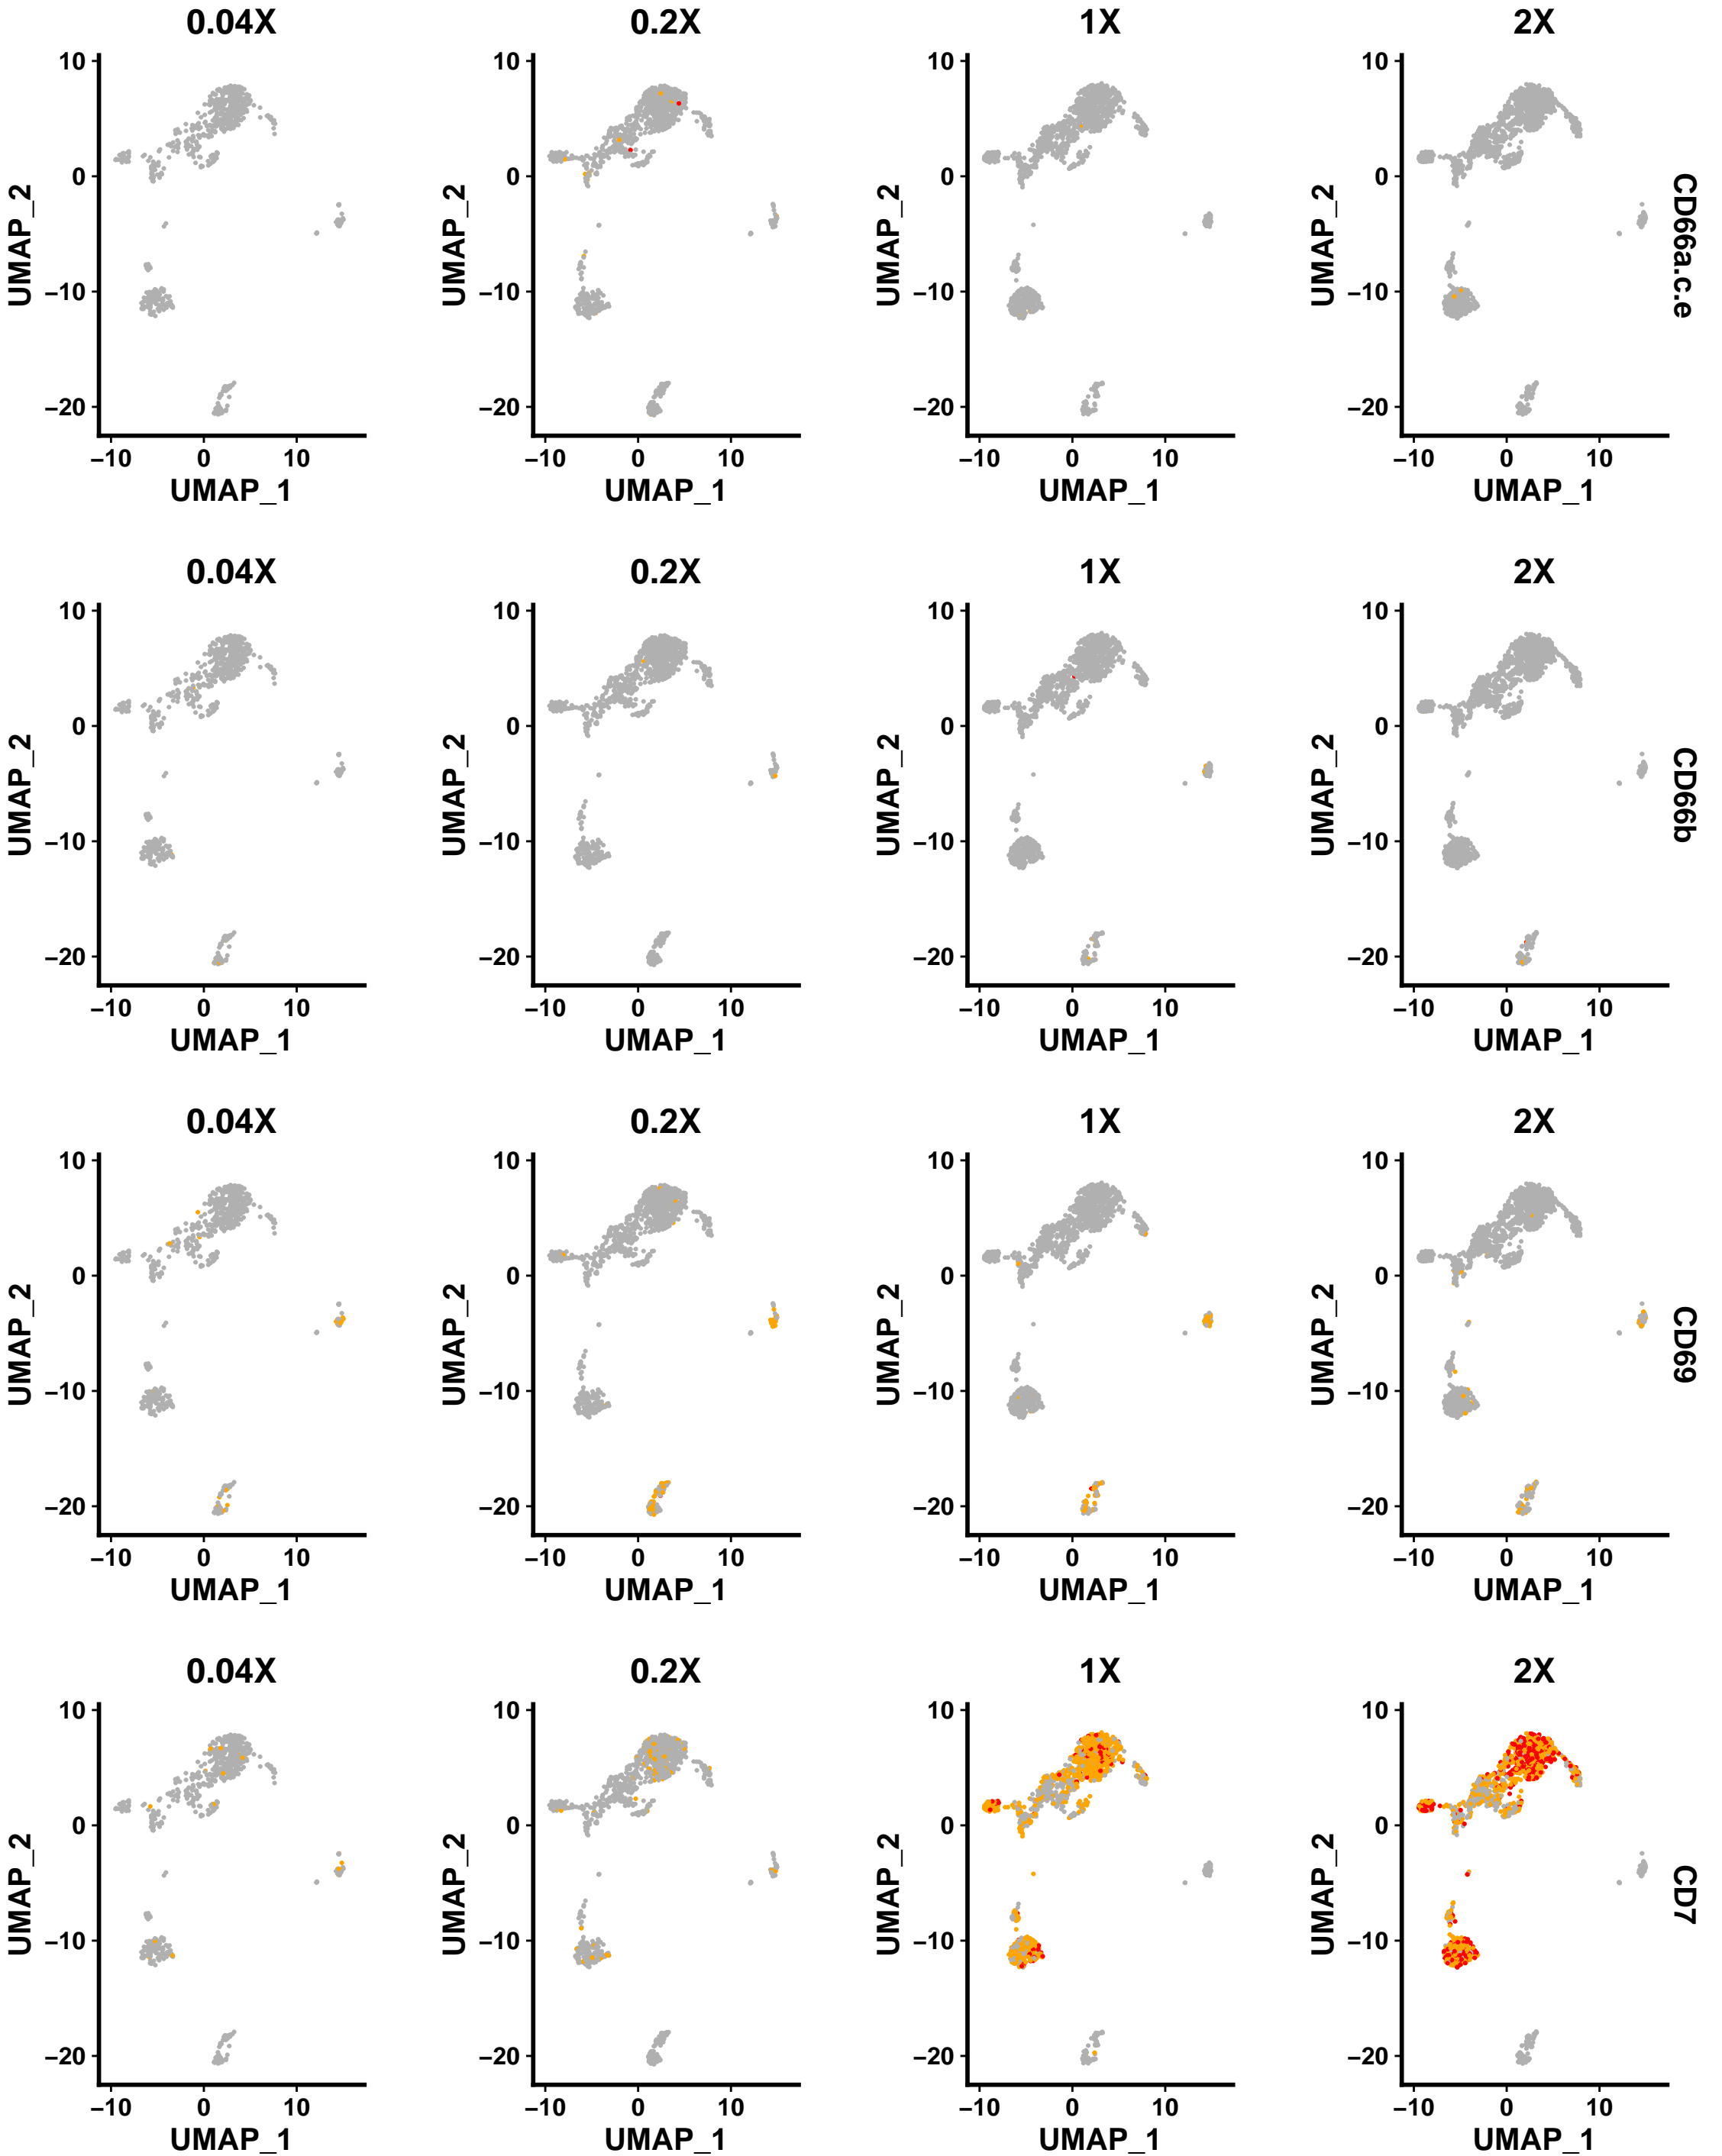



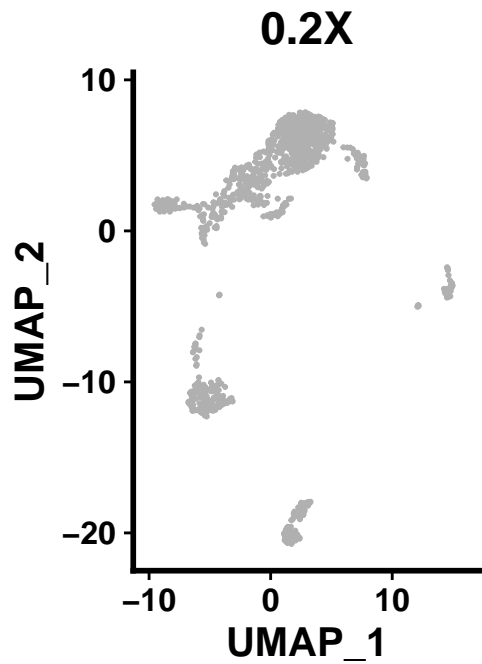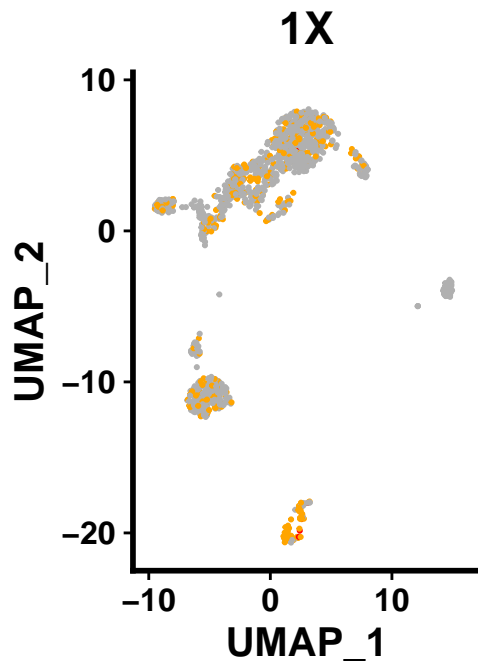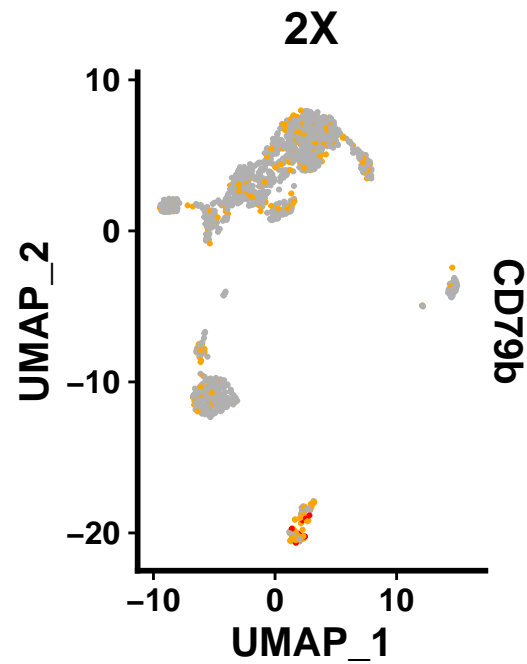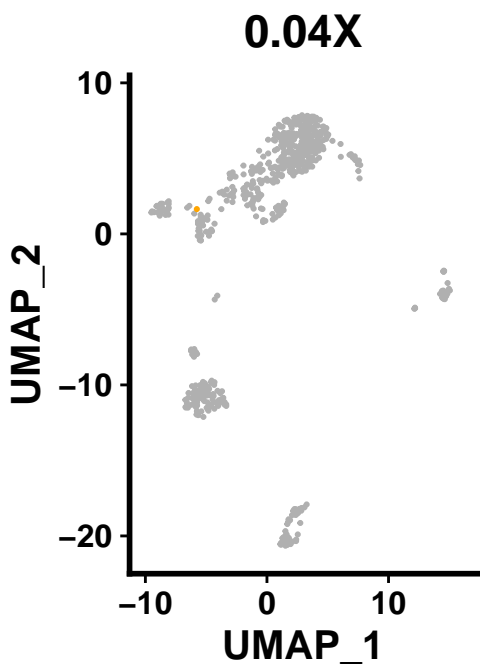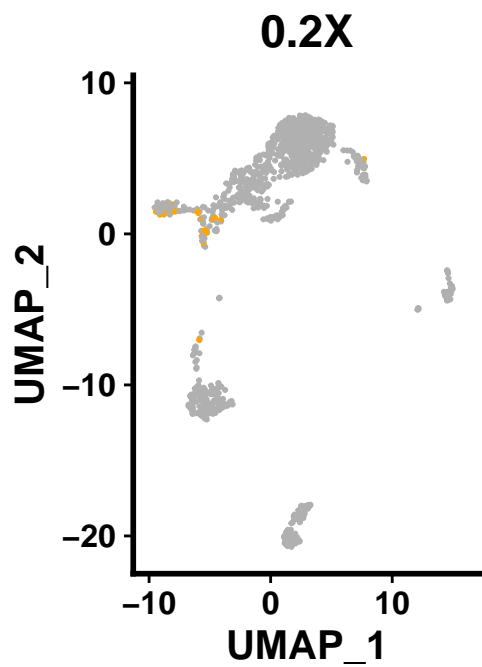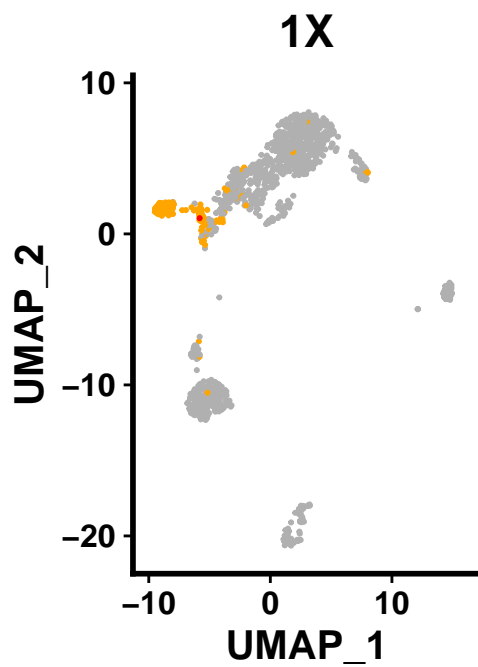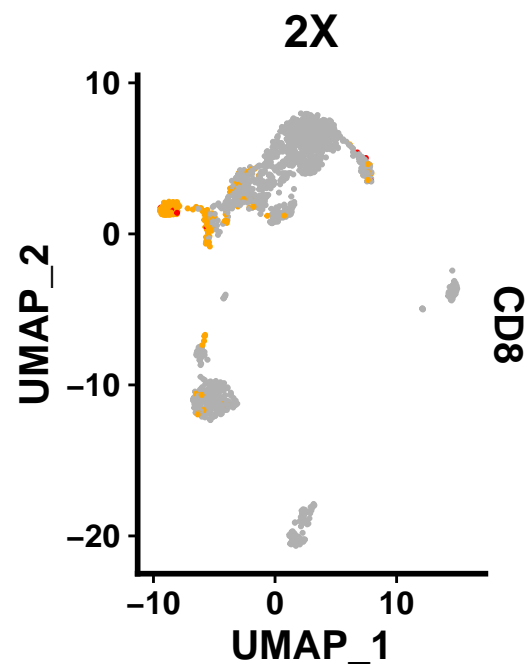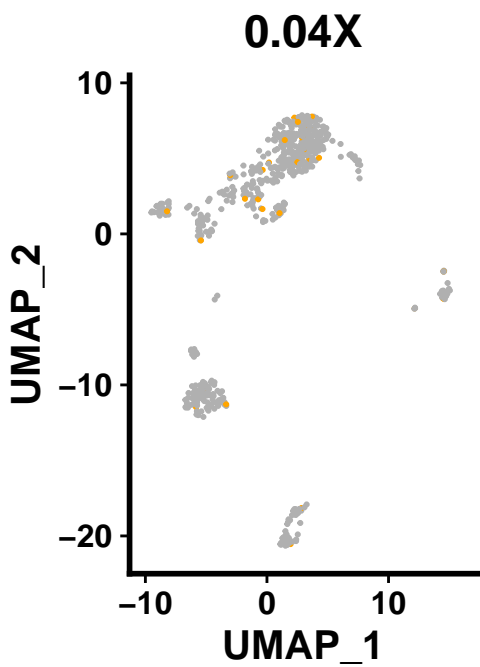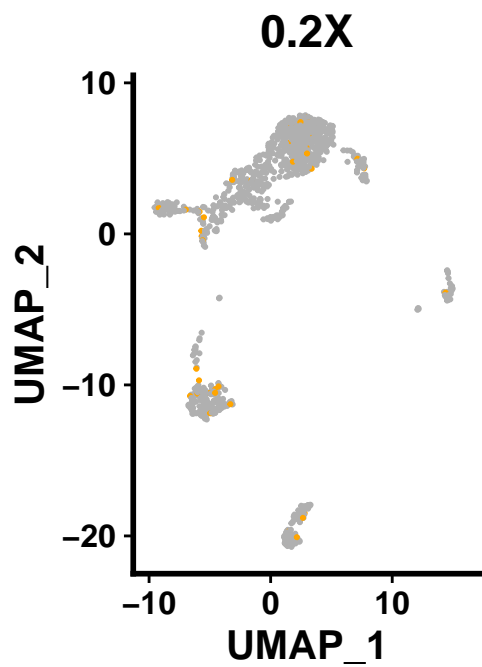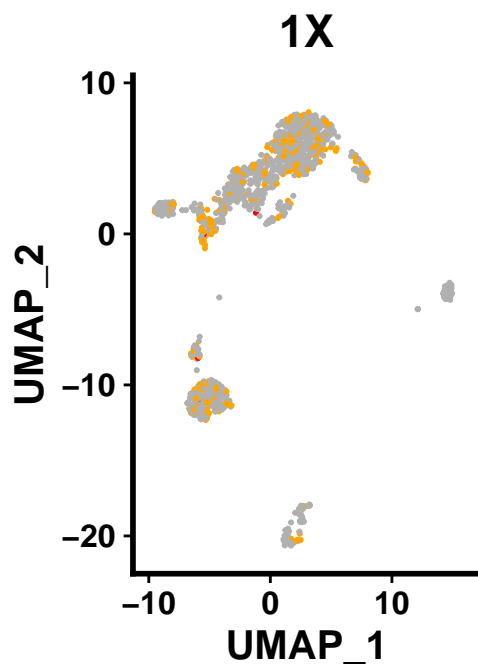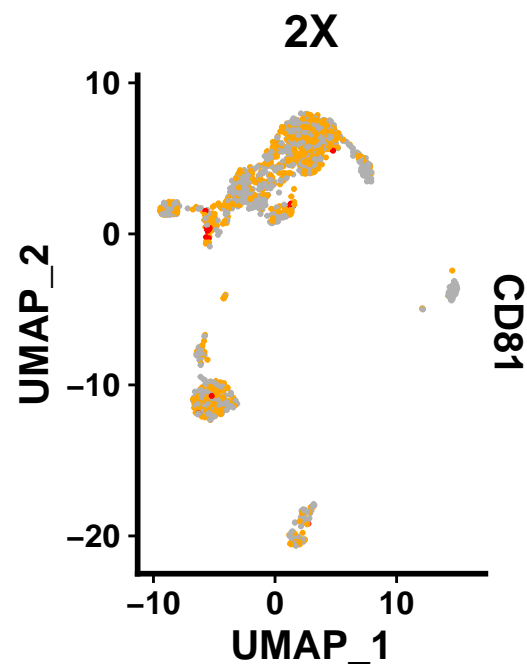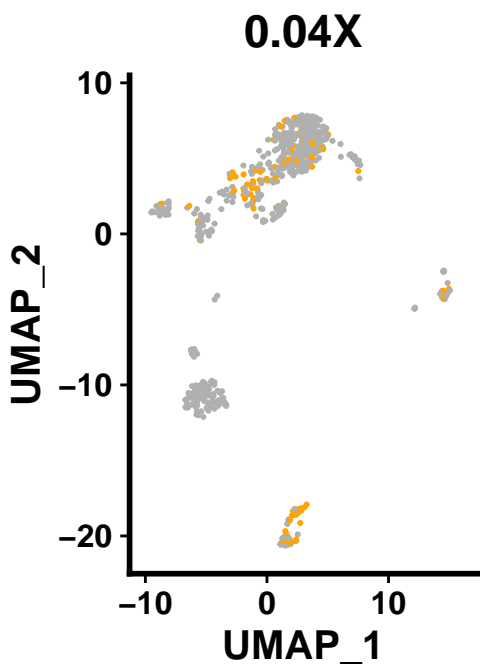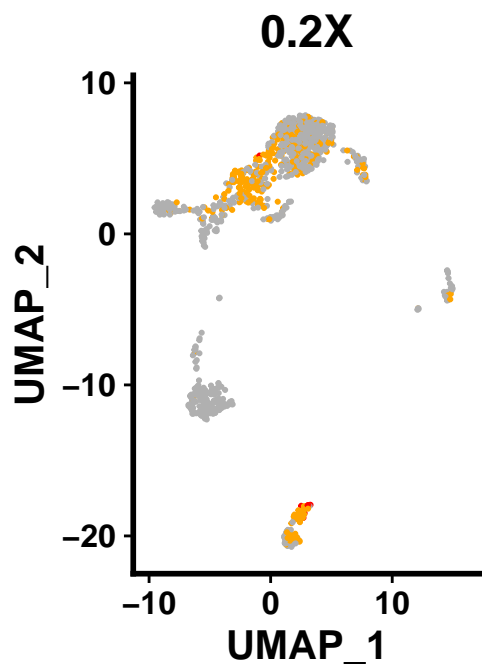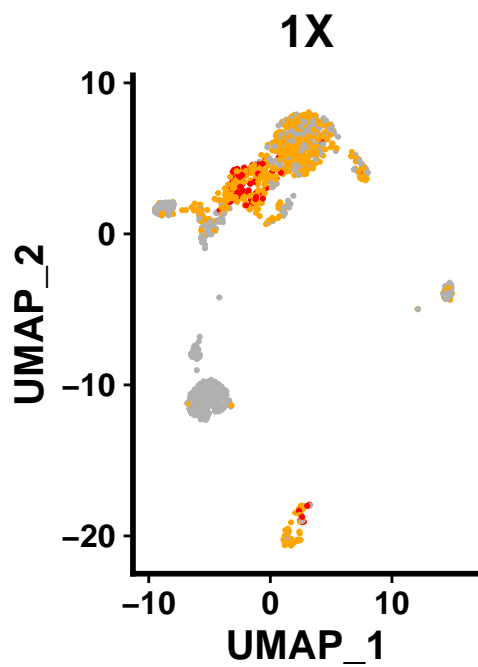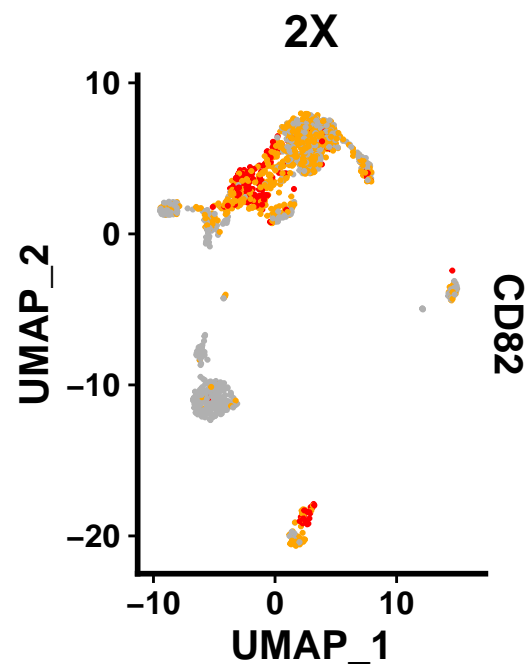

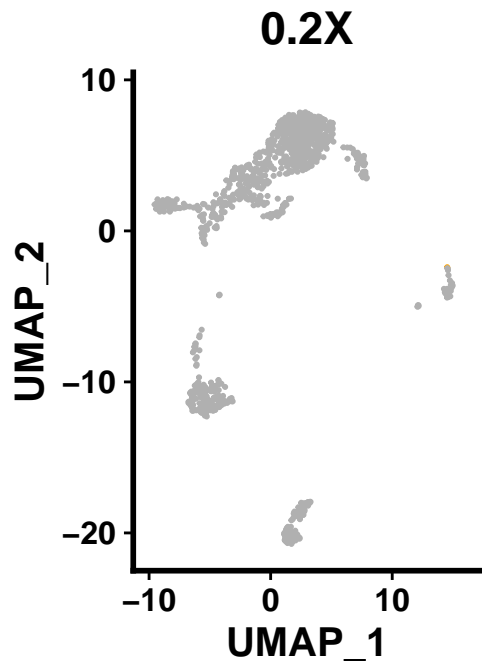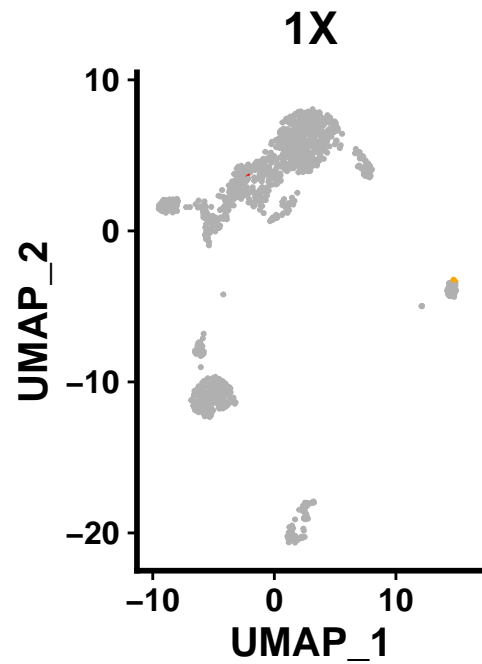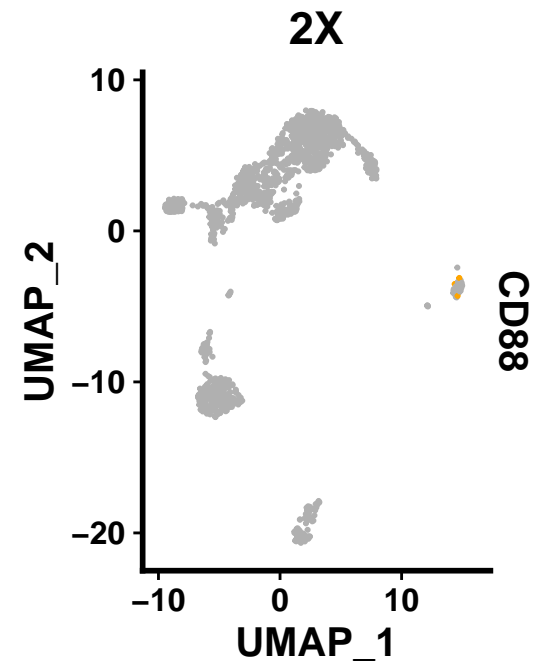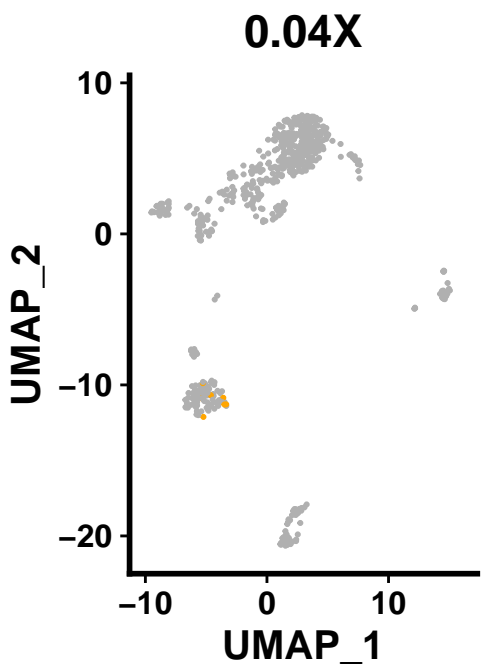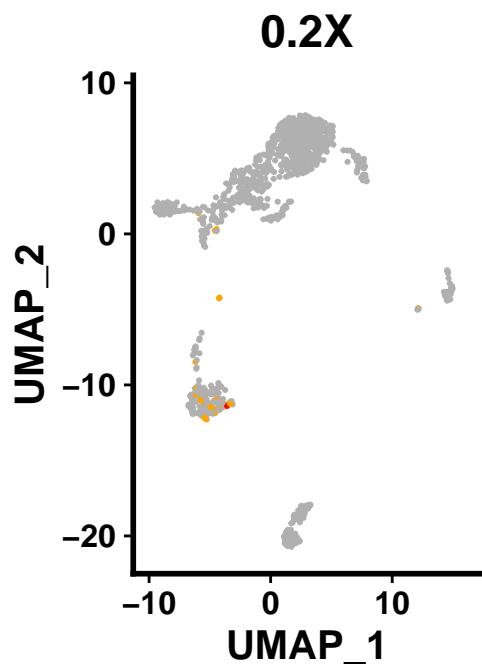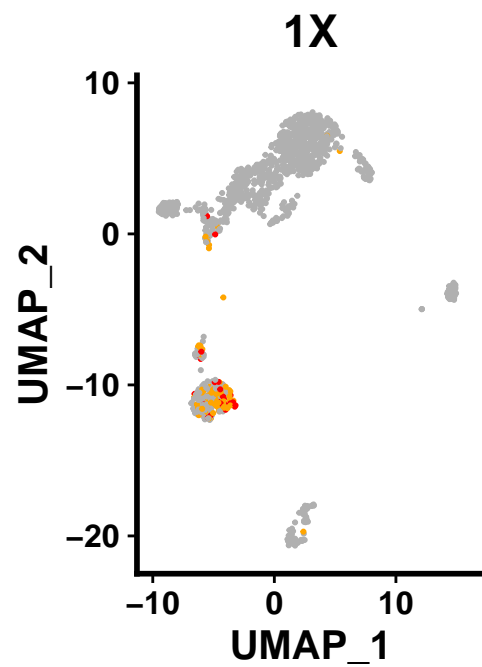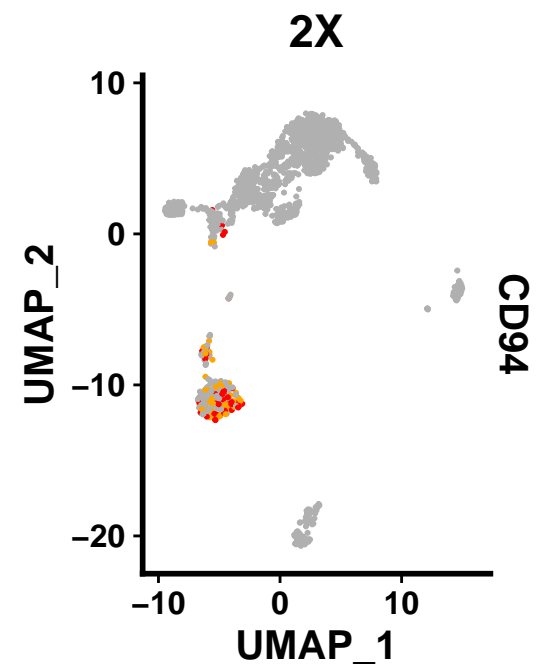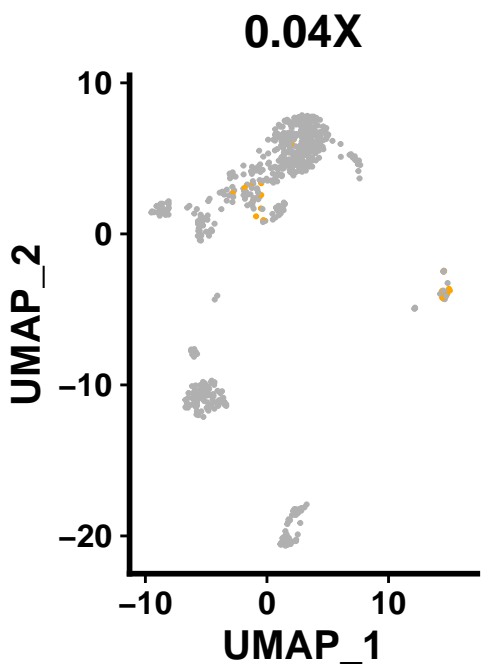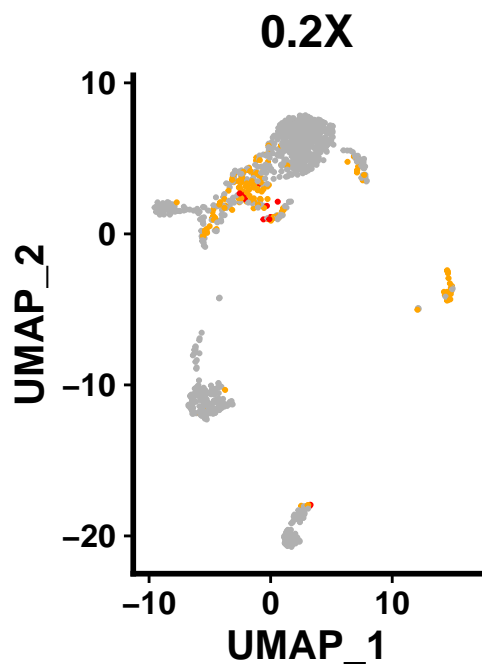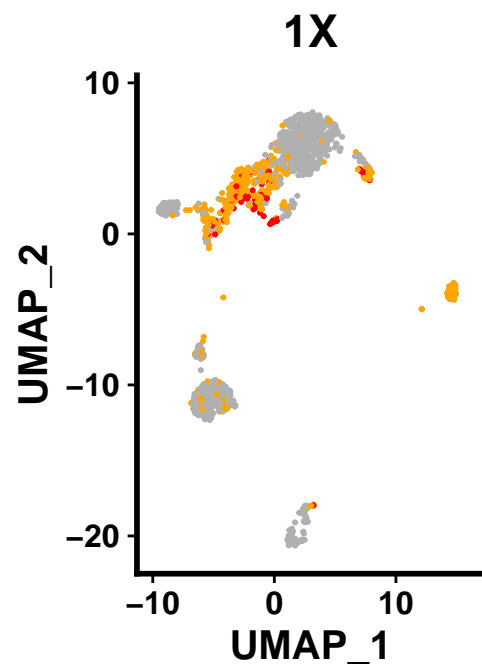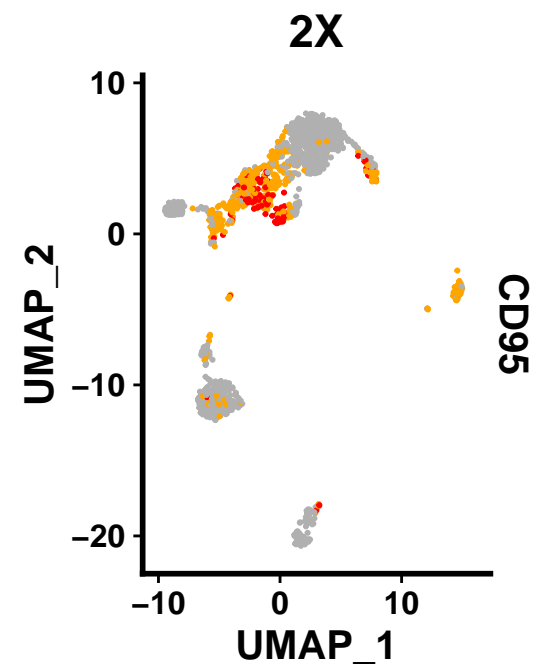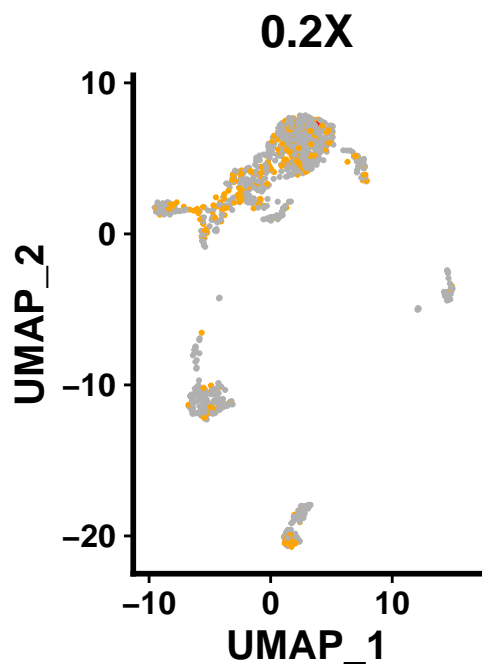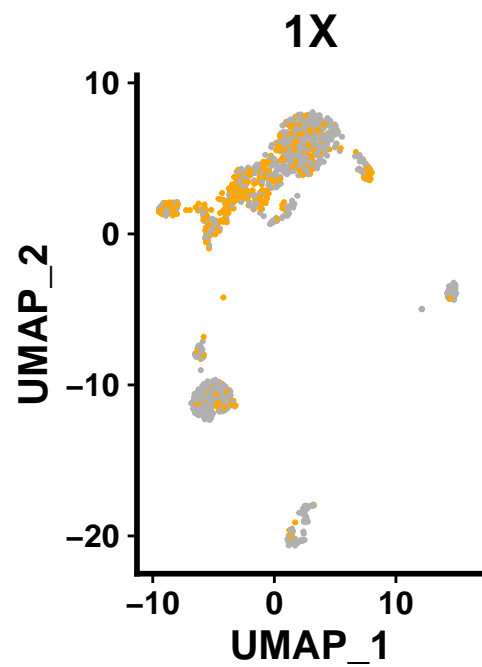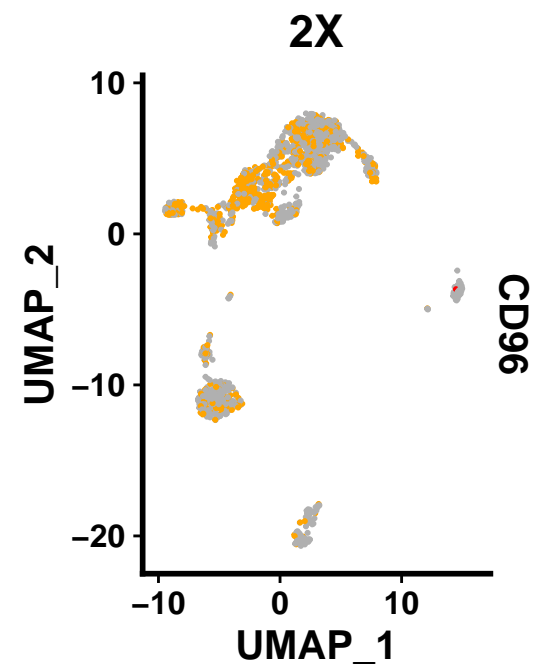

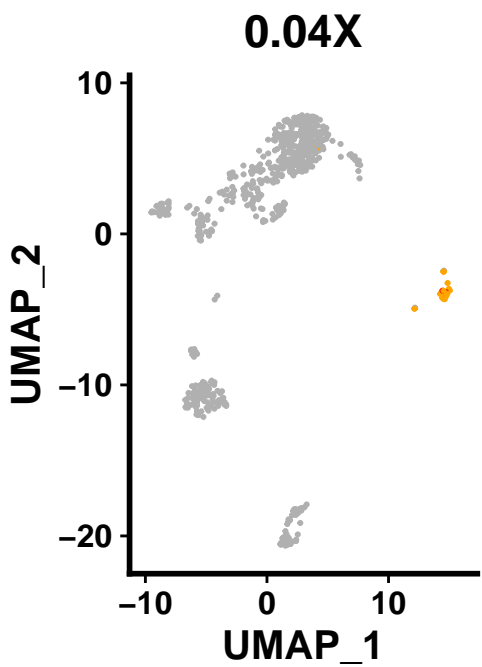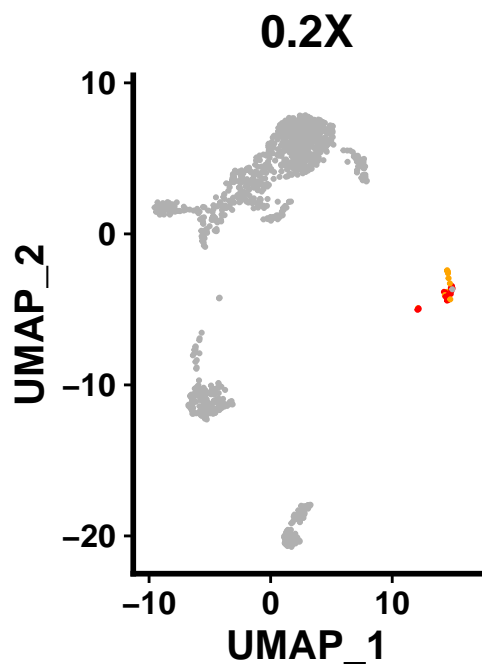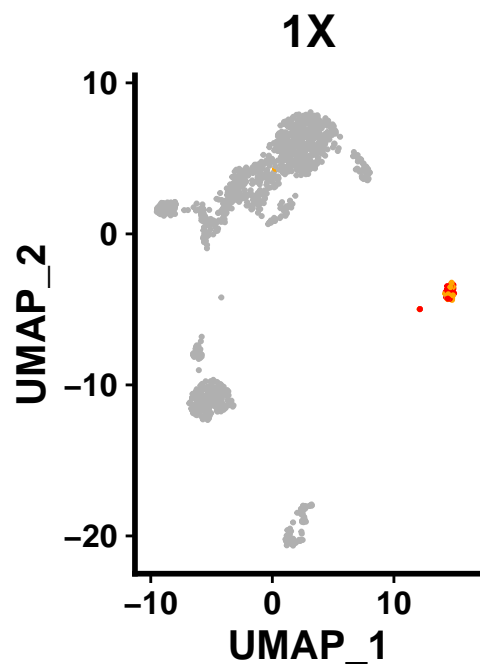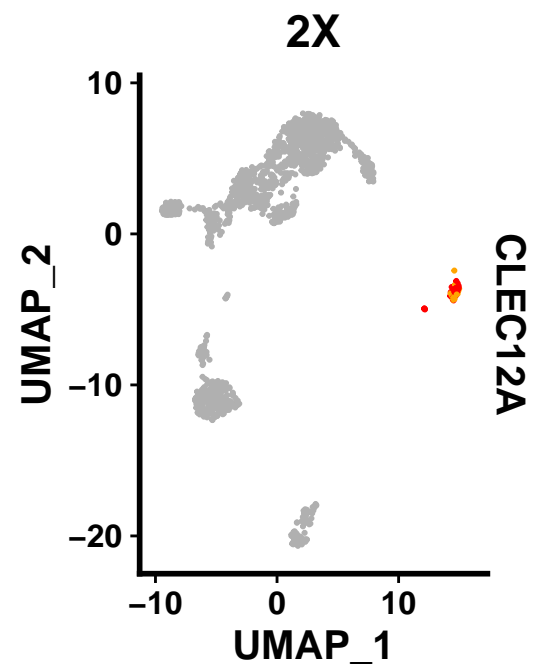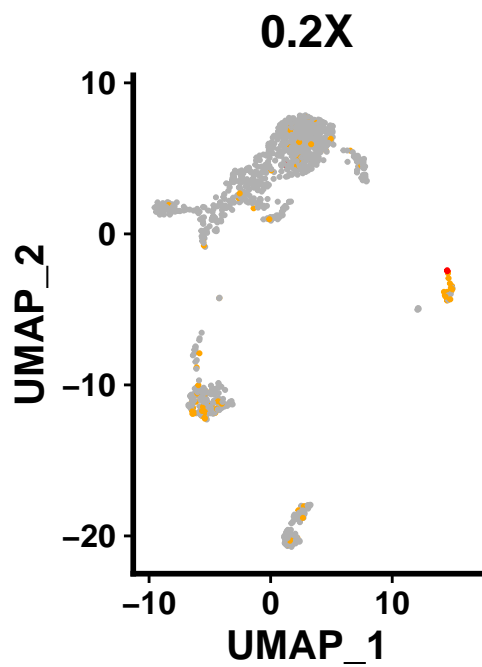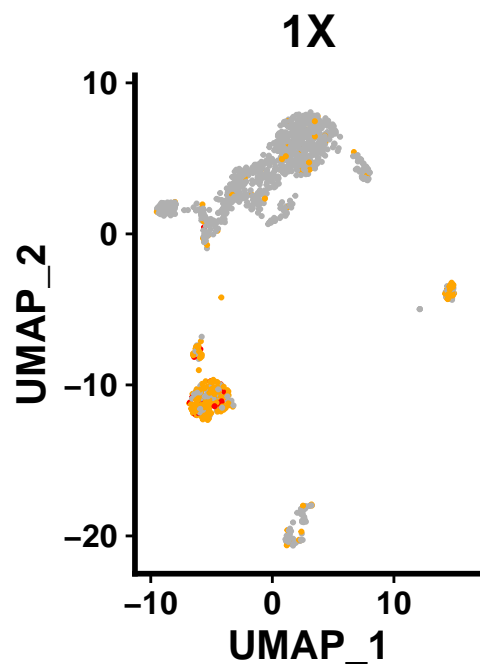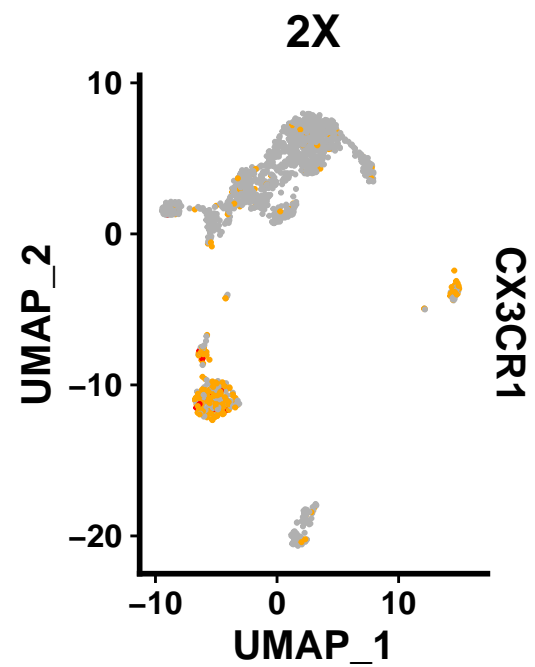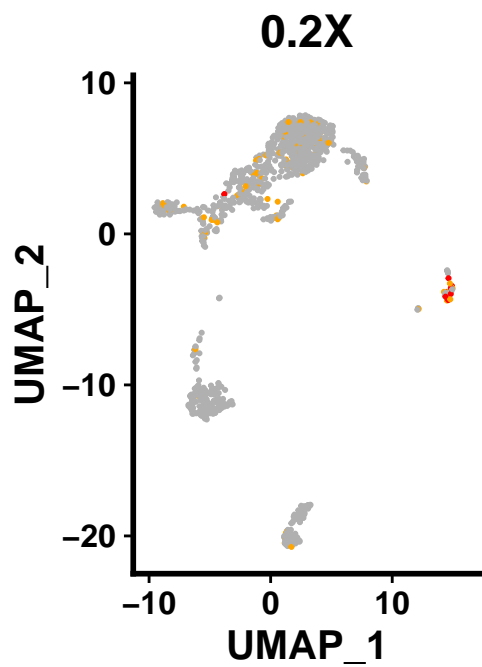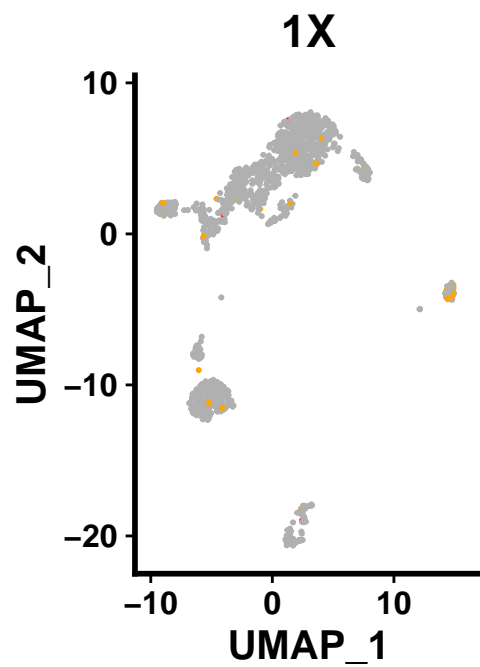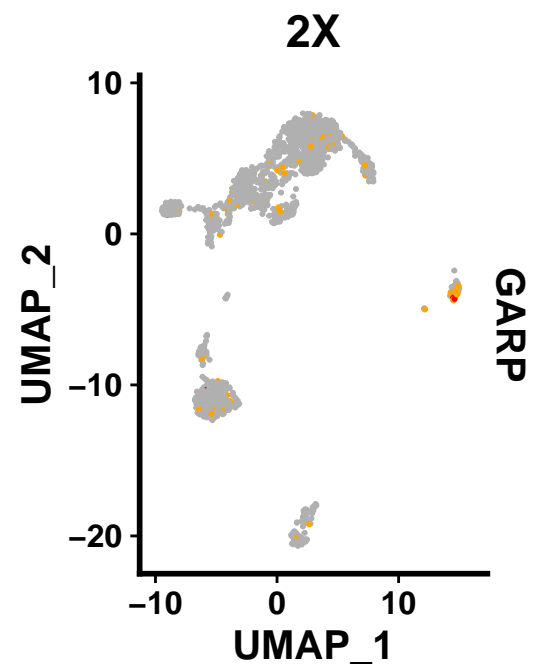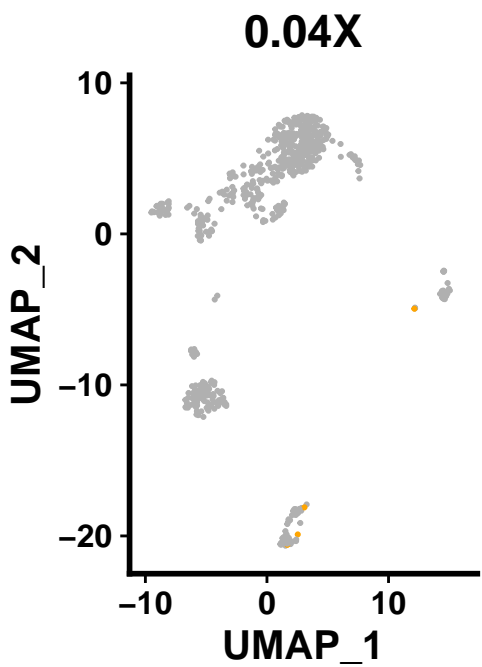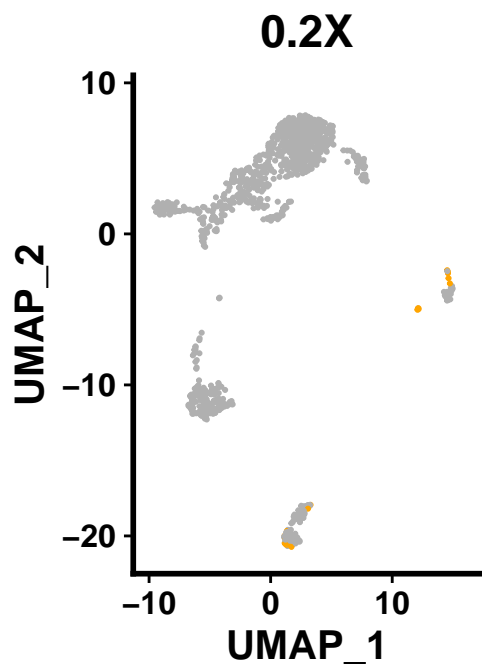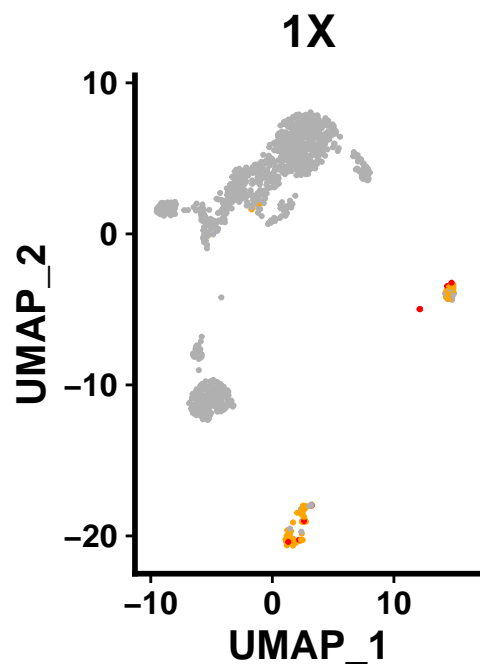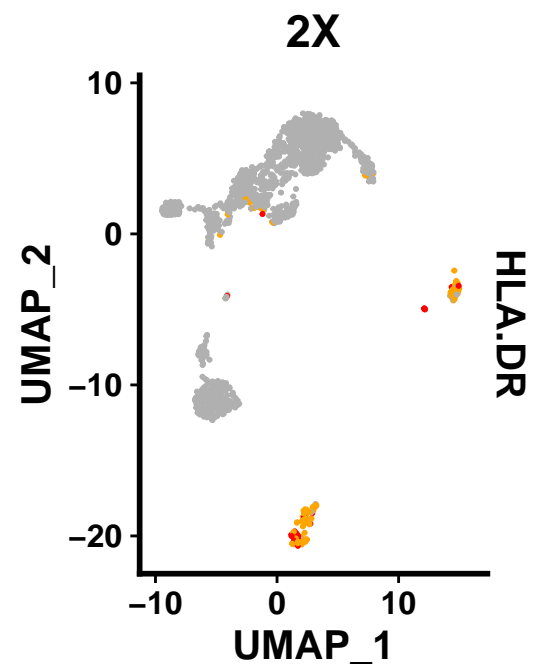

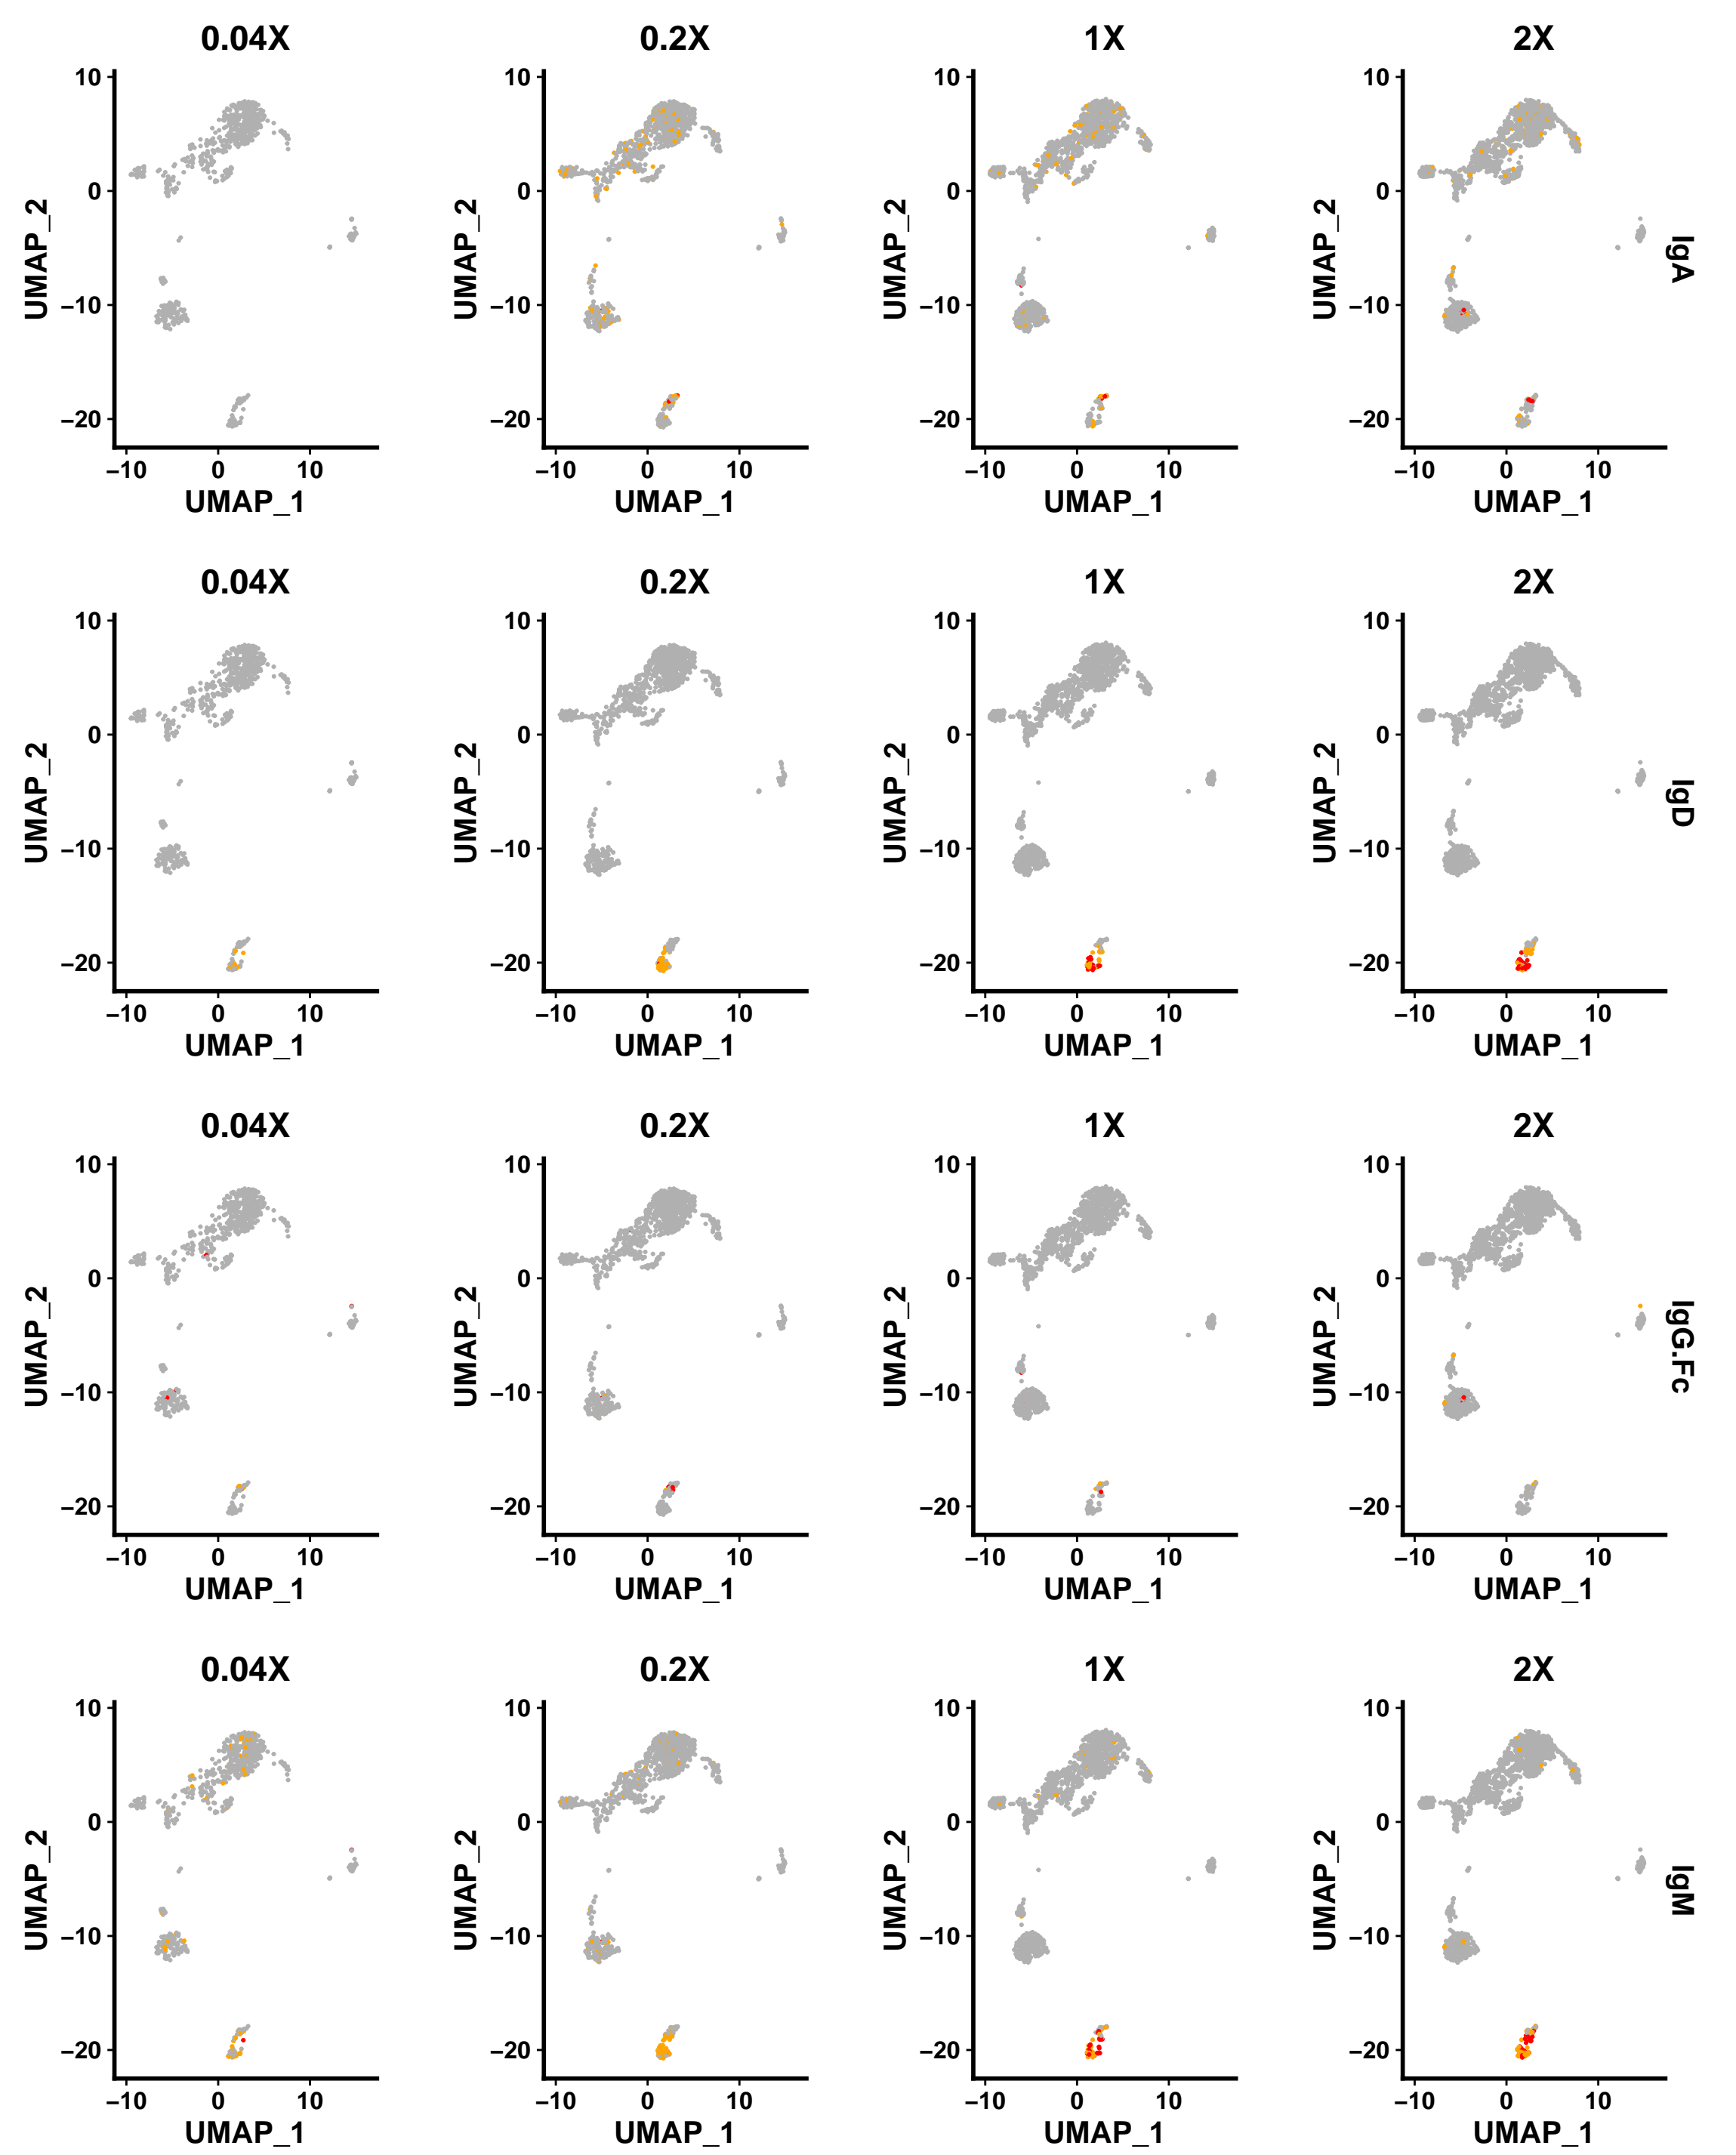

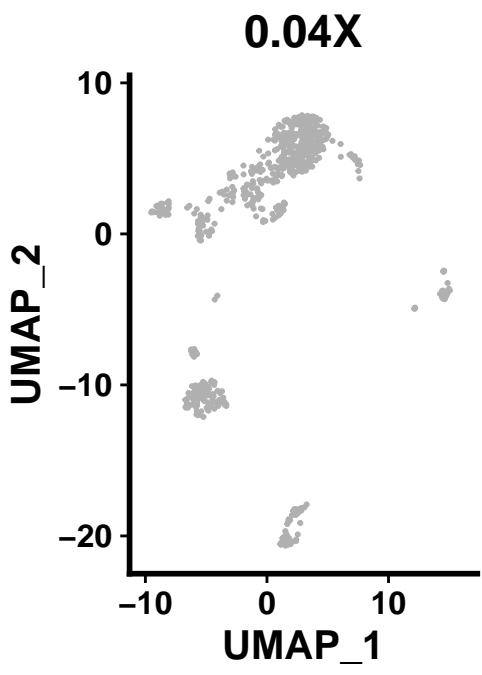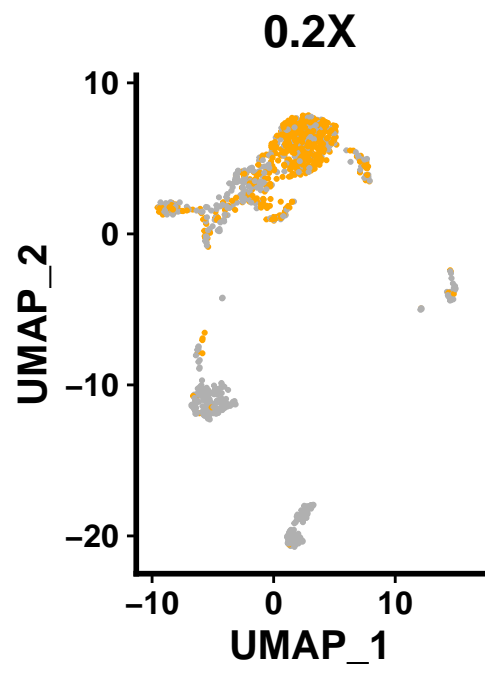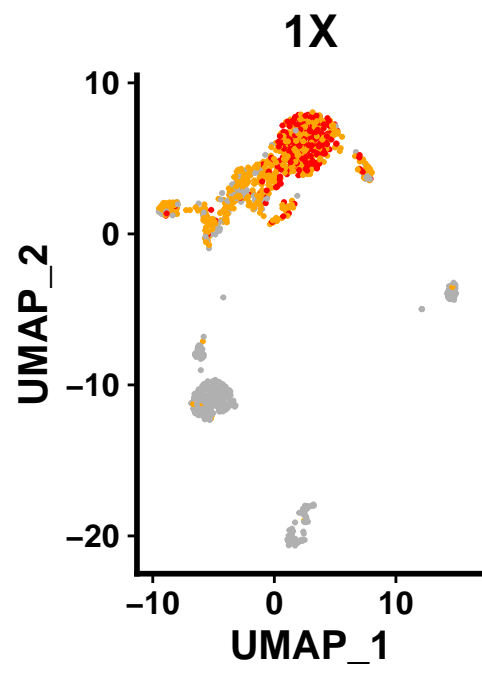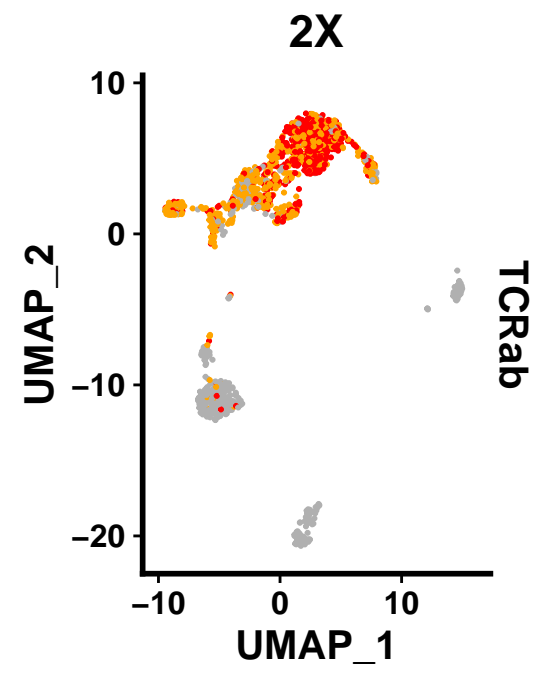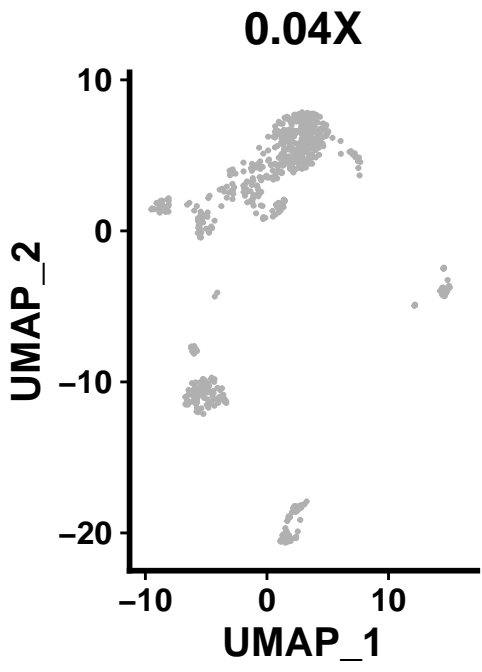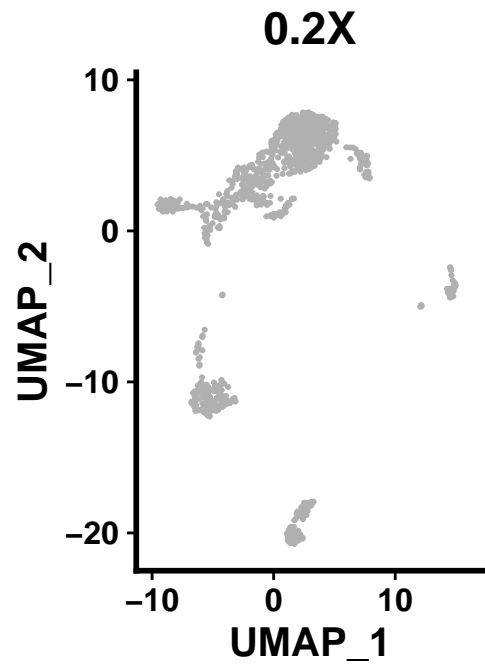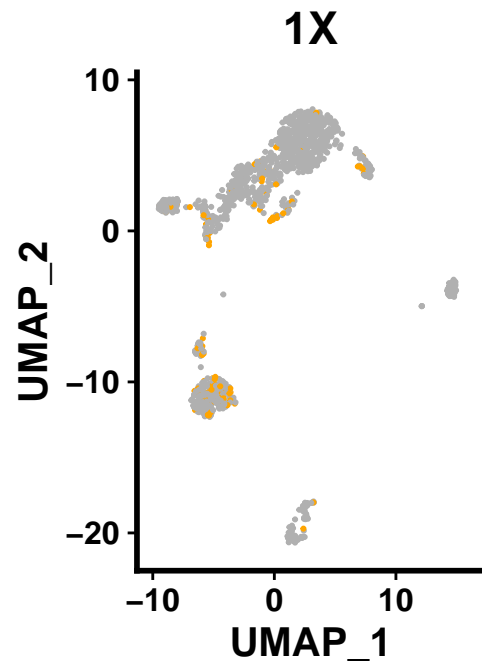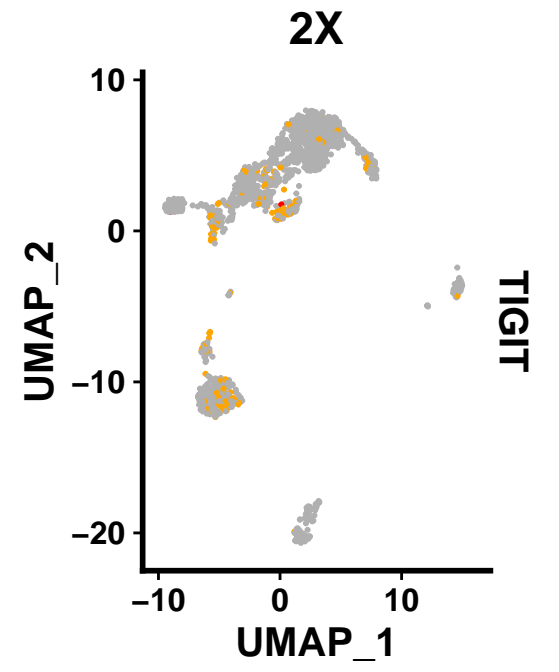

Supplement: 41598_2022_24371_MOESM4_ESM.pdf [file 41598_2022_24371_MOESM4_ESM.pdf]
