# Supplementary material for: Titration of 124 antibodies using CITE-Seq on human PBMCs
Source: PubMed Central journal article supplement (PMC9718773; doi:10.1038/s41598-022-24371-7), 2022-12-02

## CD10

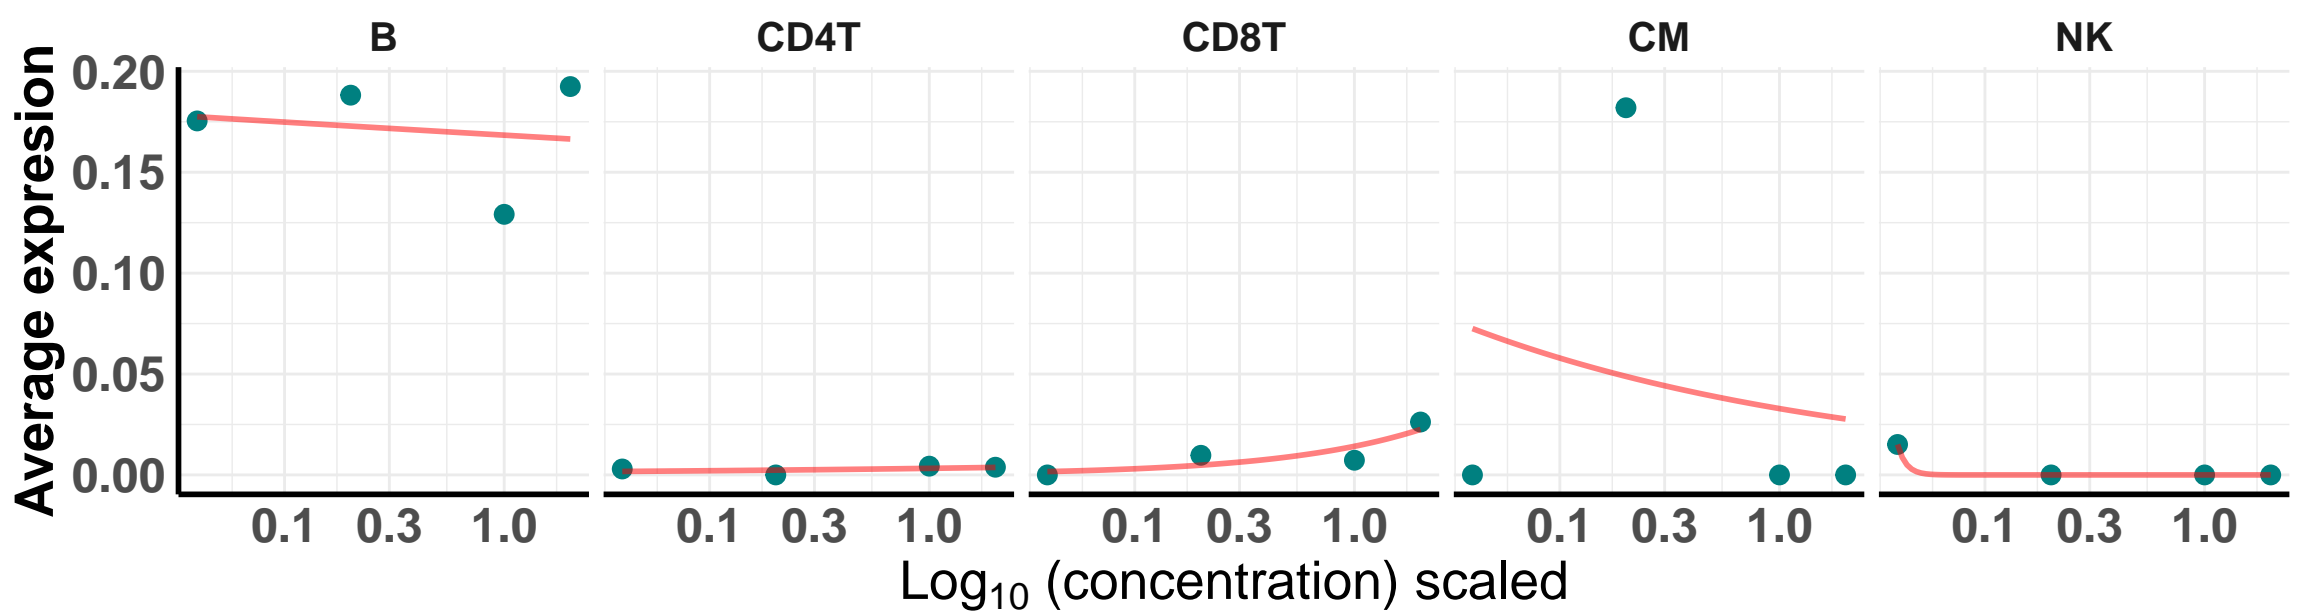

## CD101

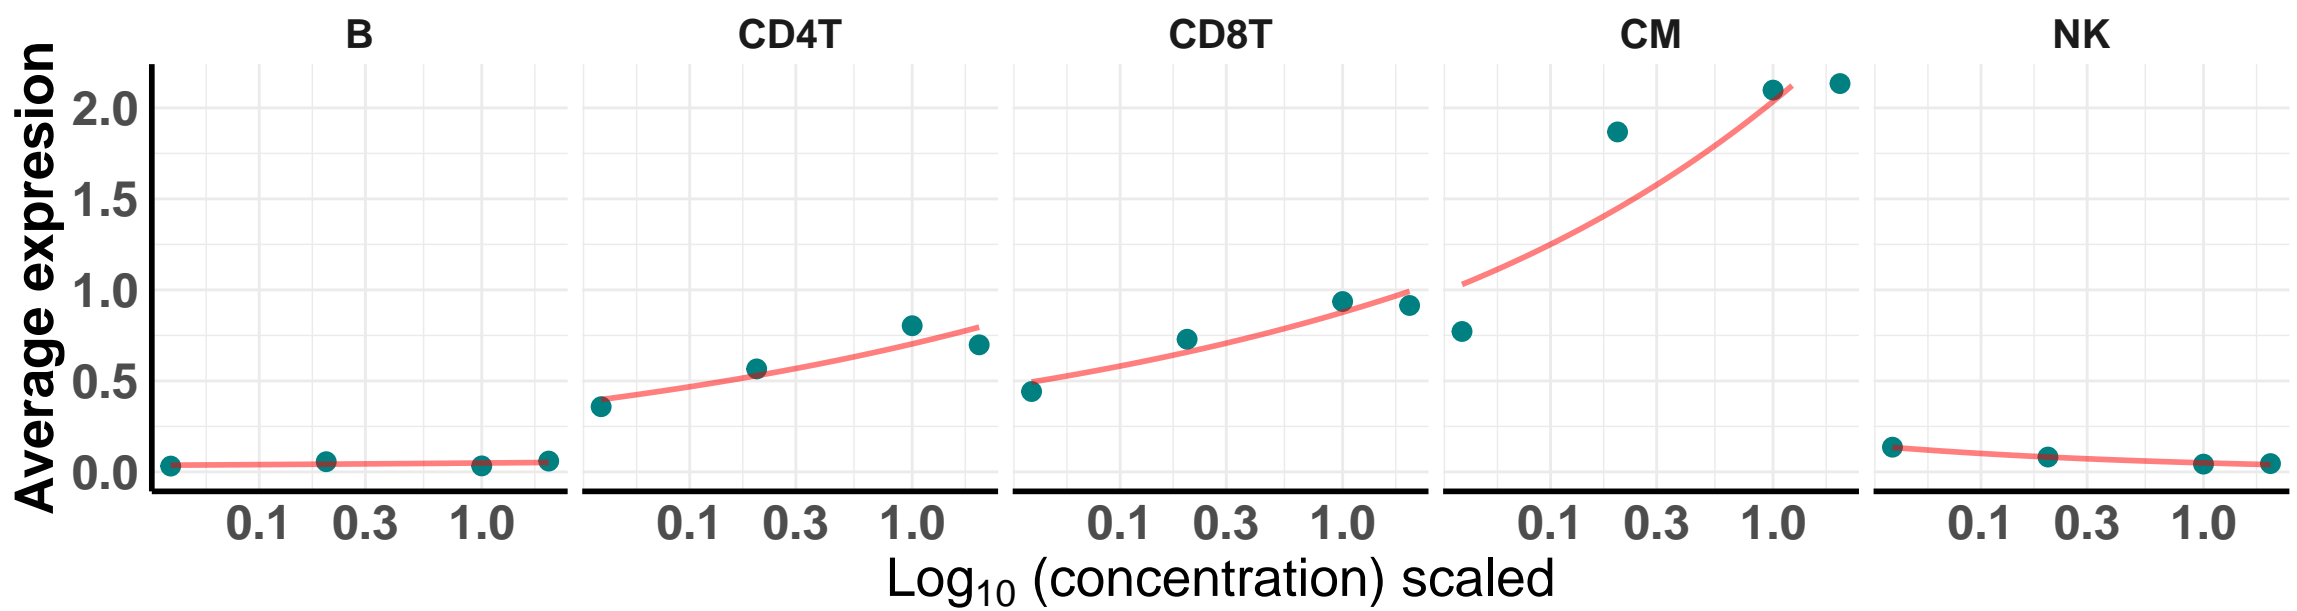

## CD107a

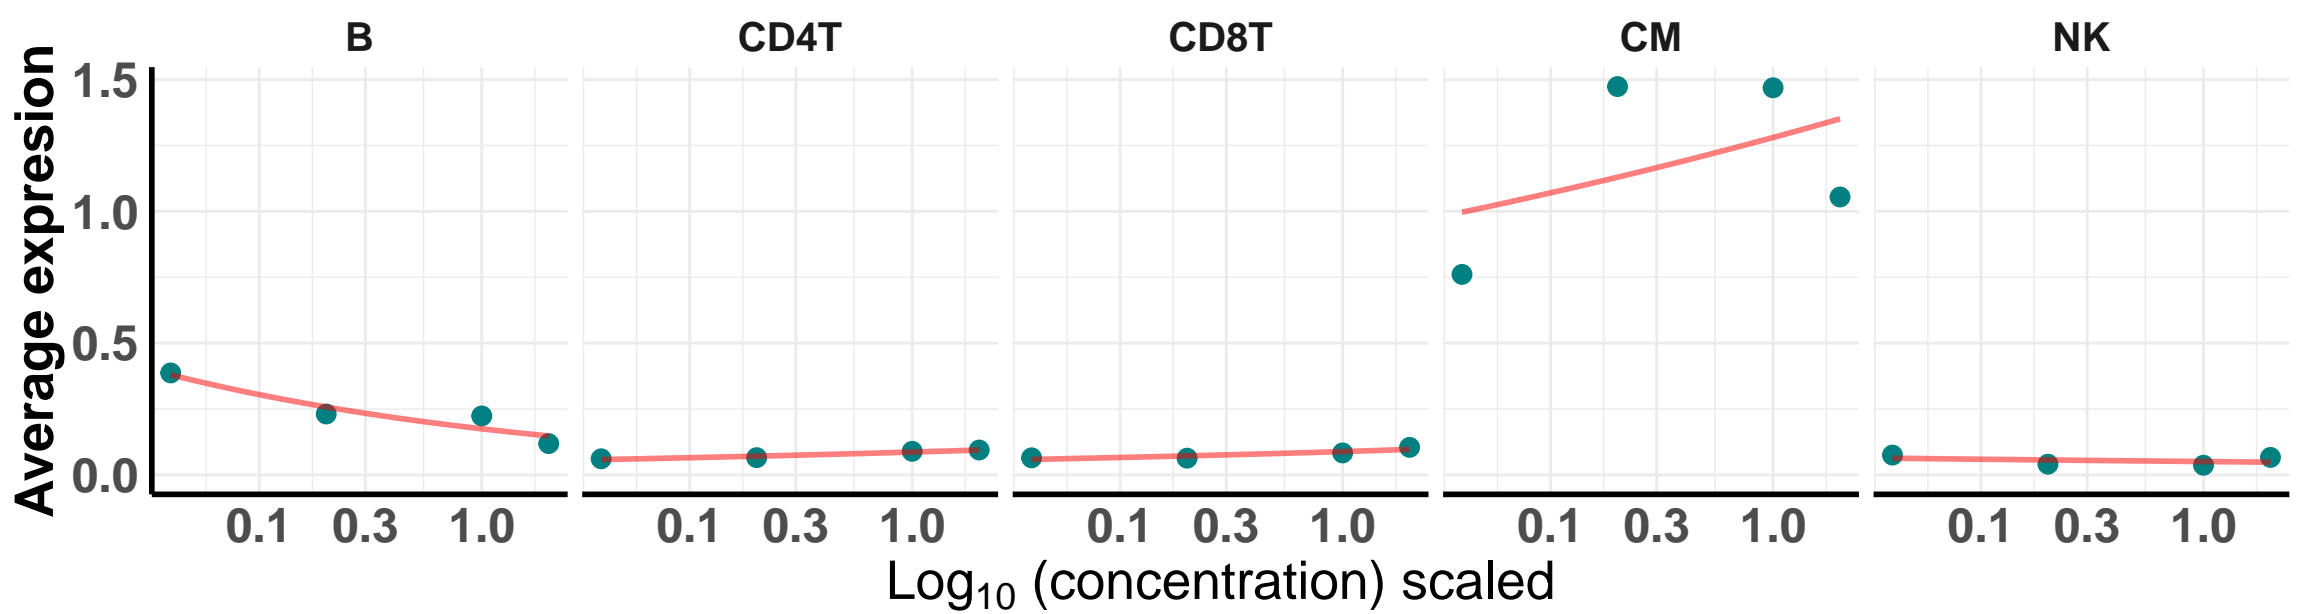

## CD11a

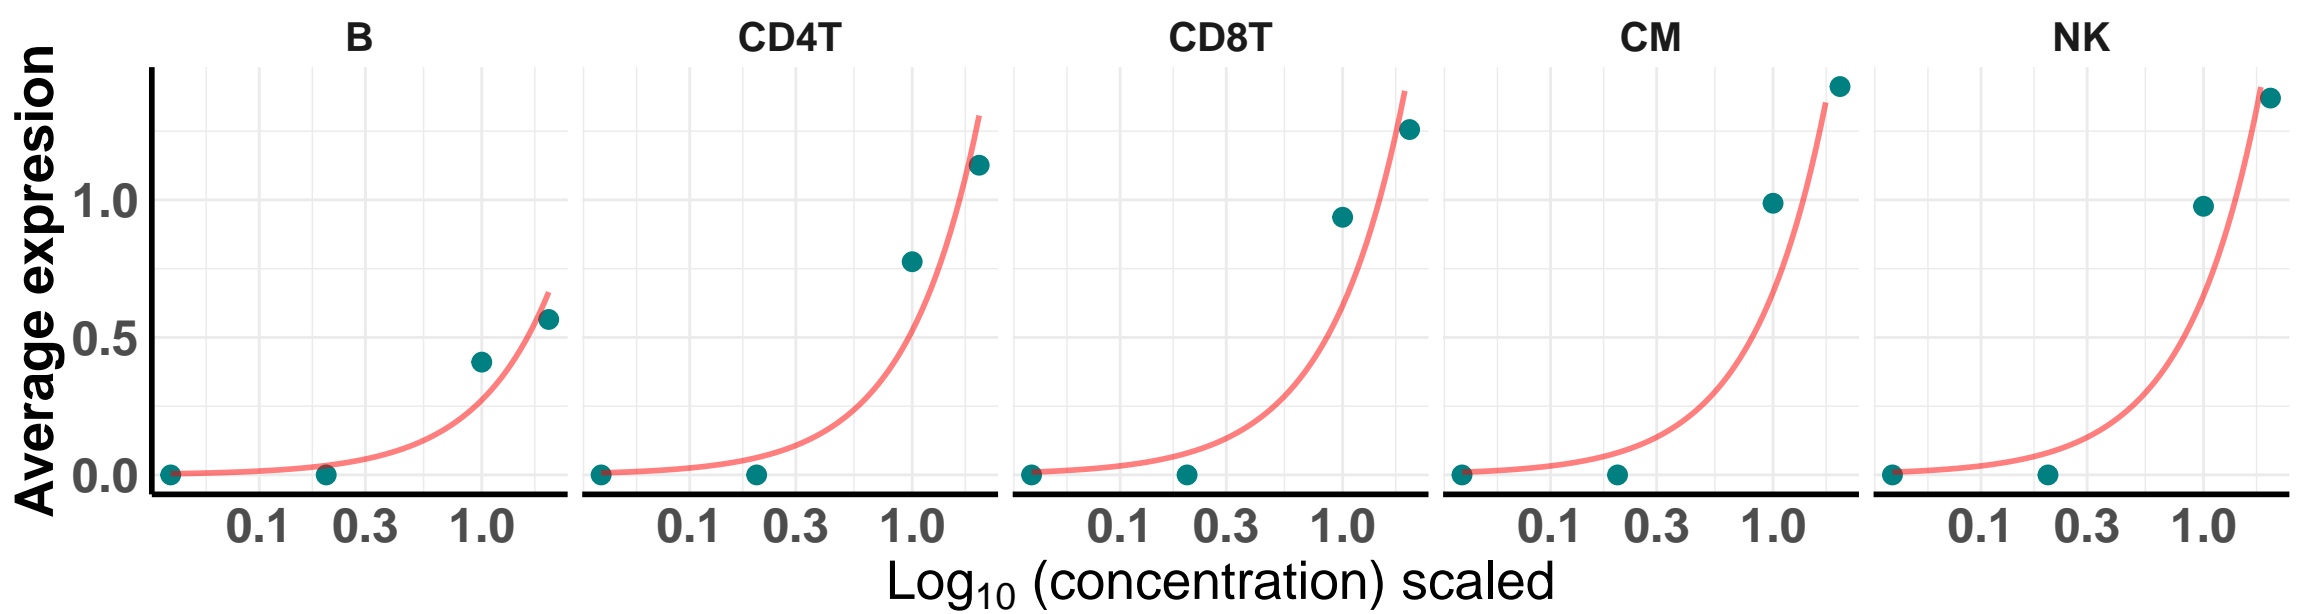

# CD11c

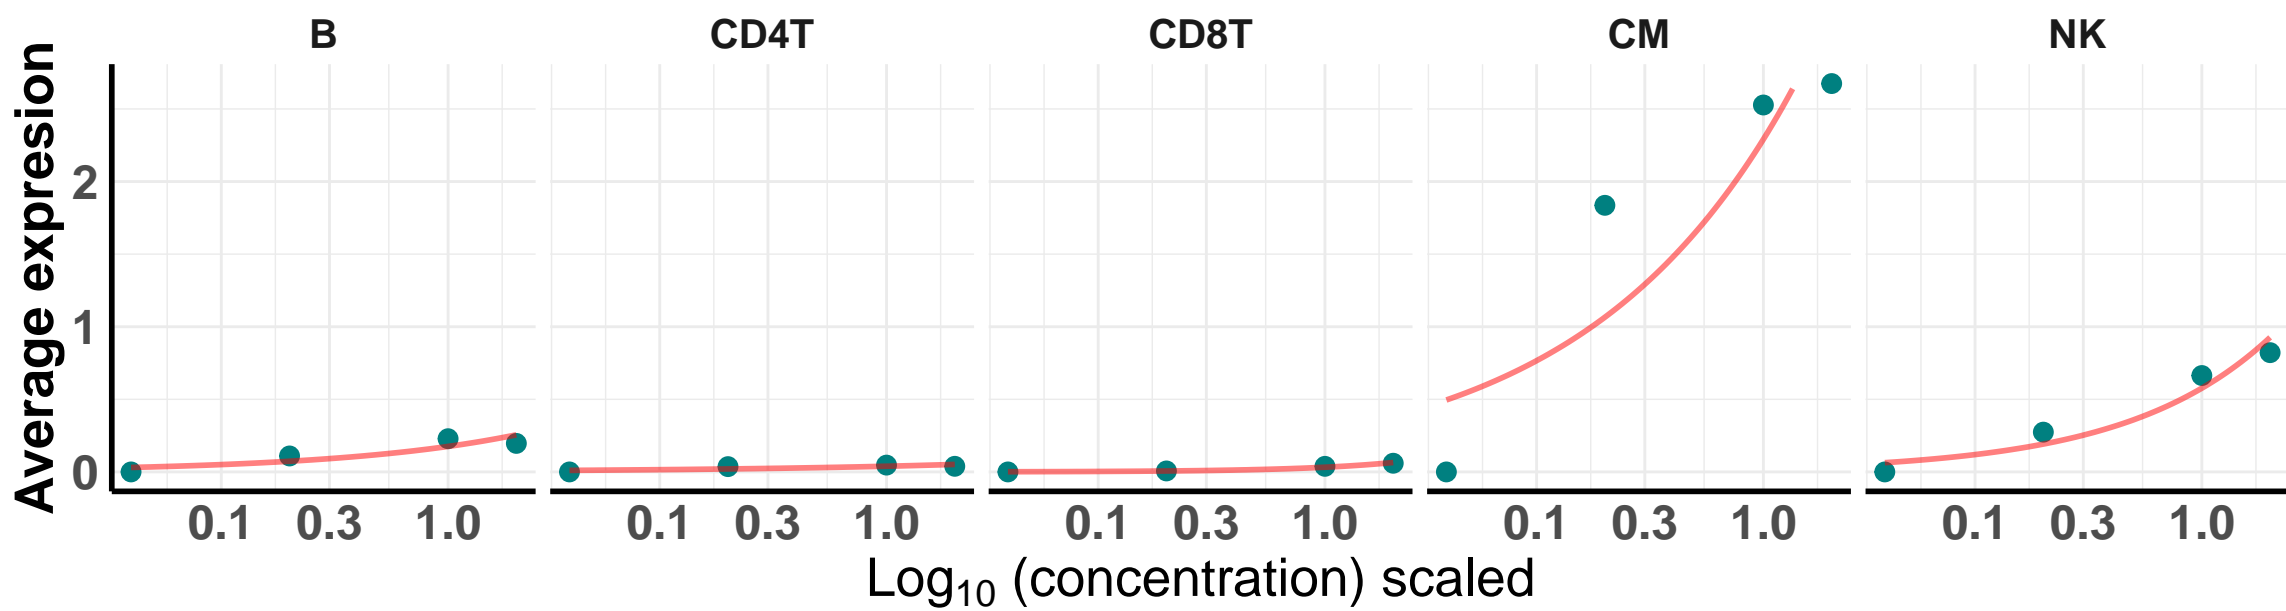

# CD122

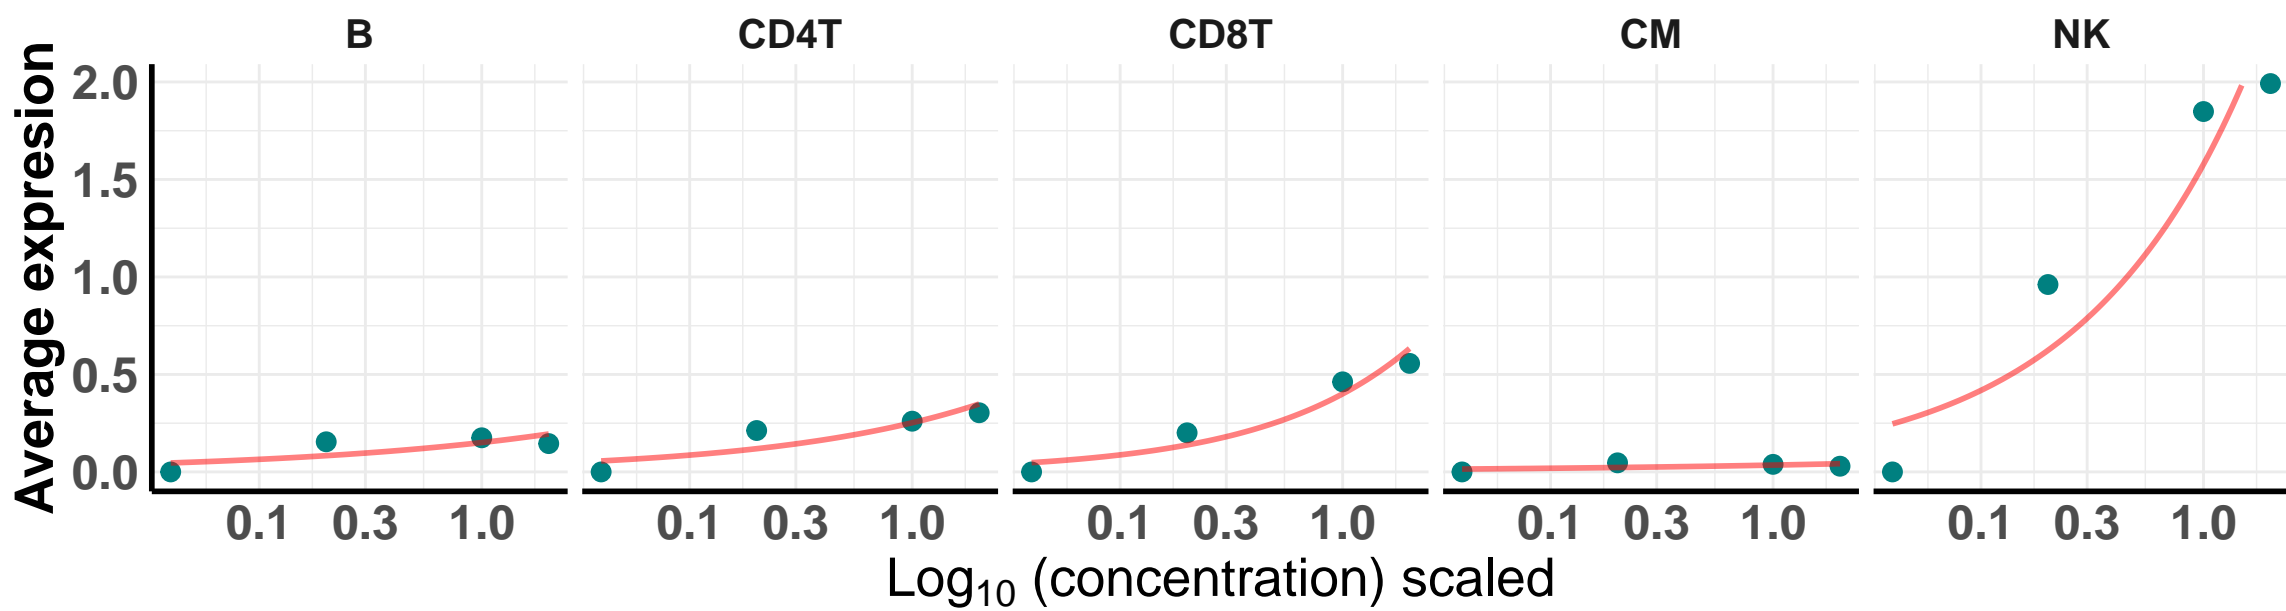

# CD123

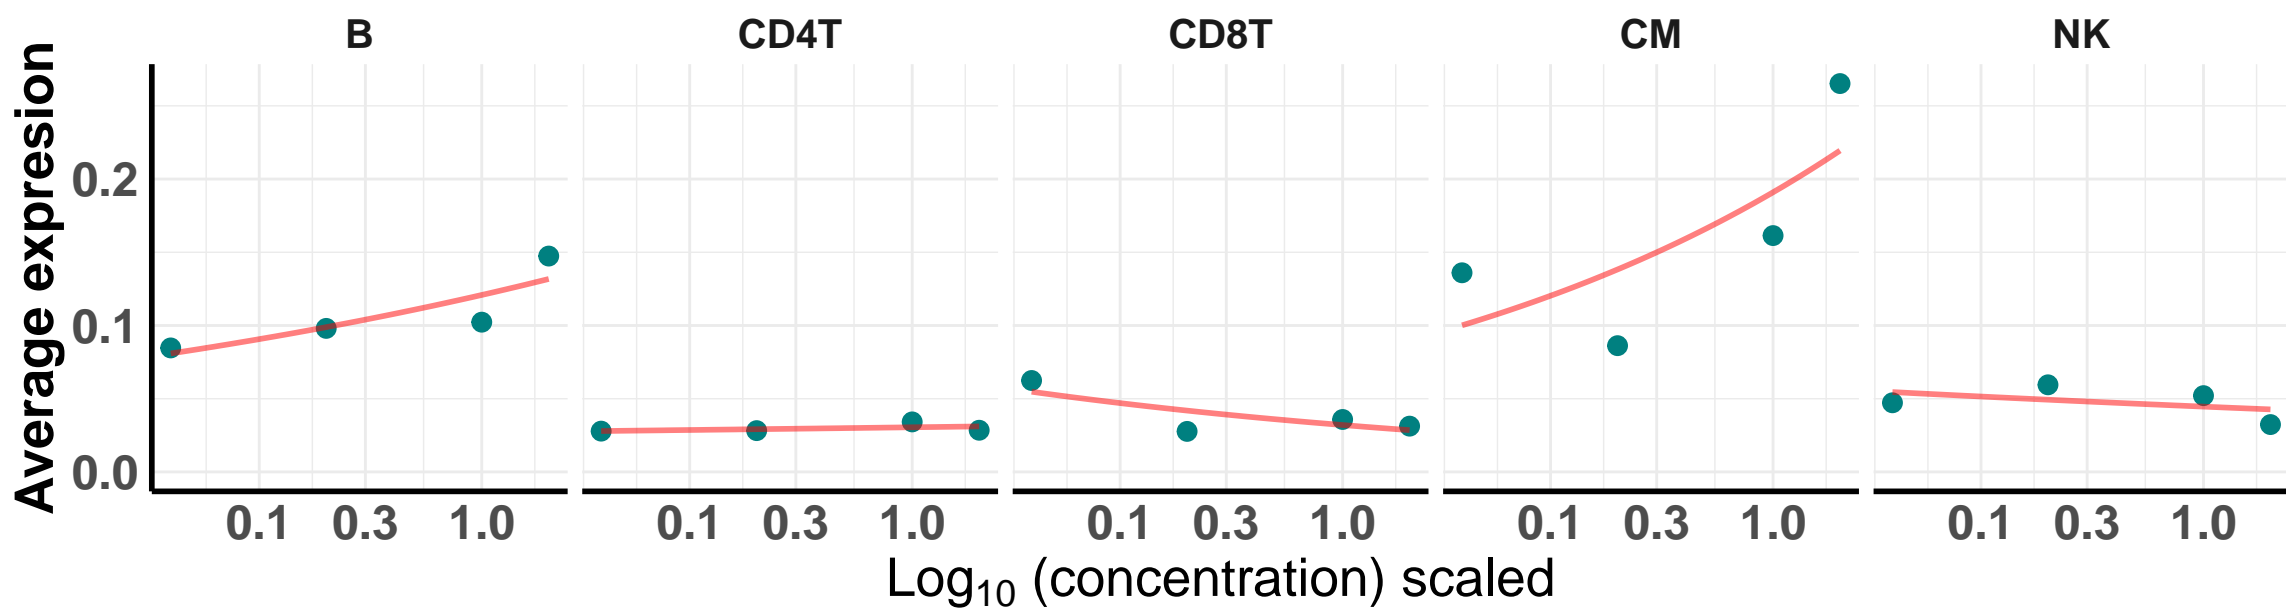

# CD127

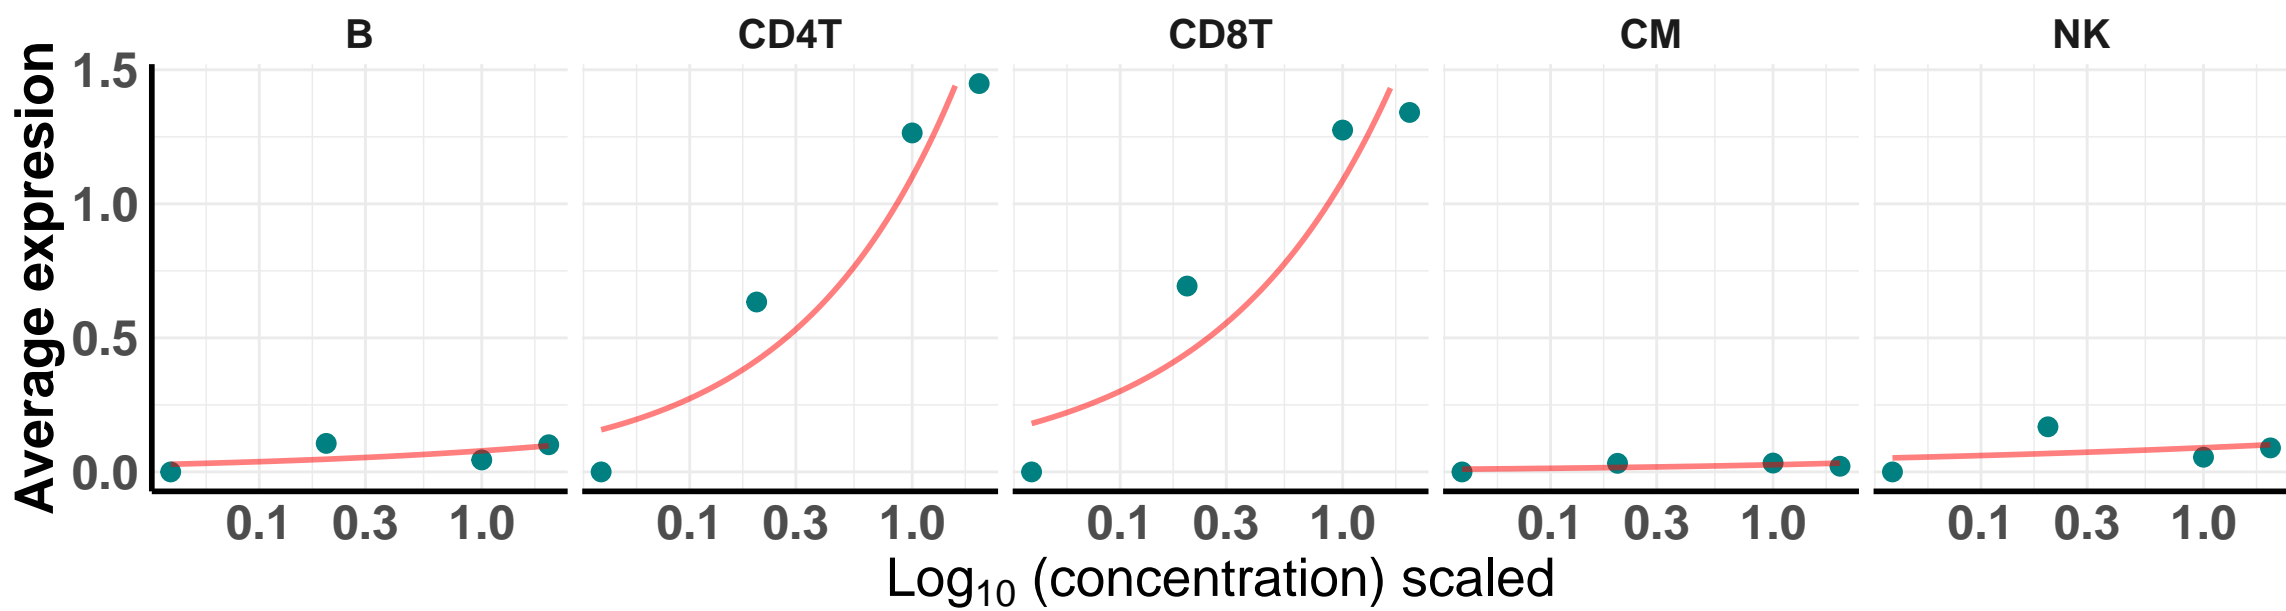

# CD141

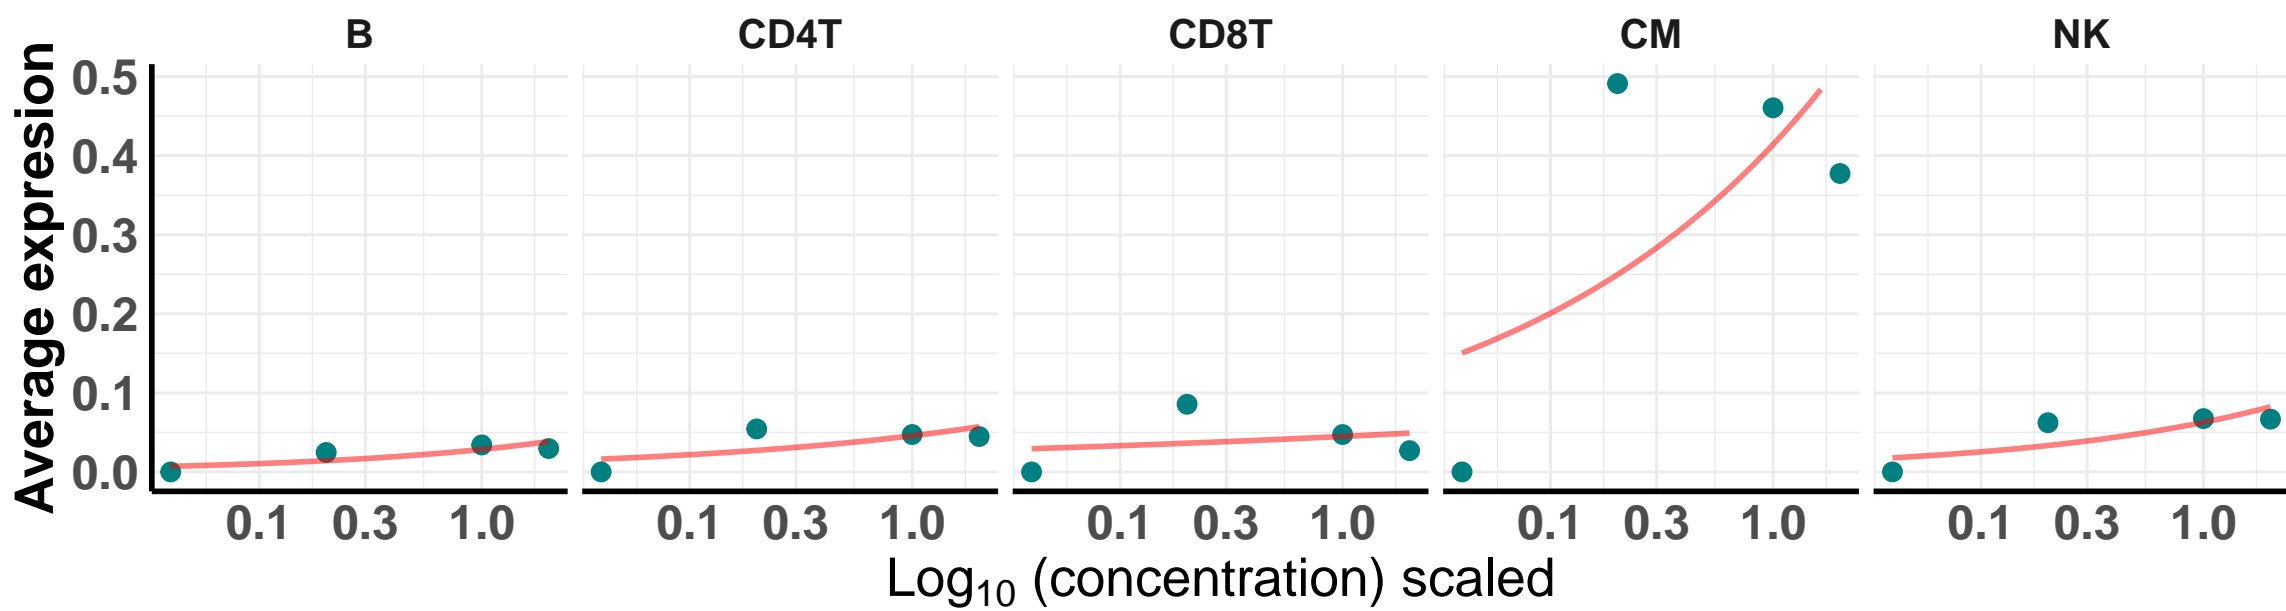

# CD15

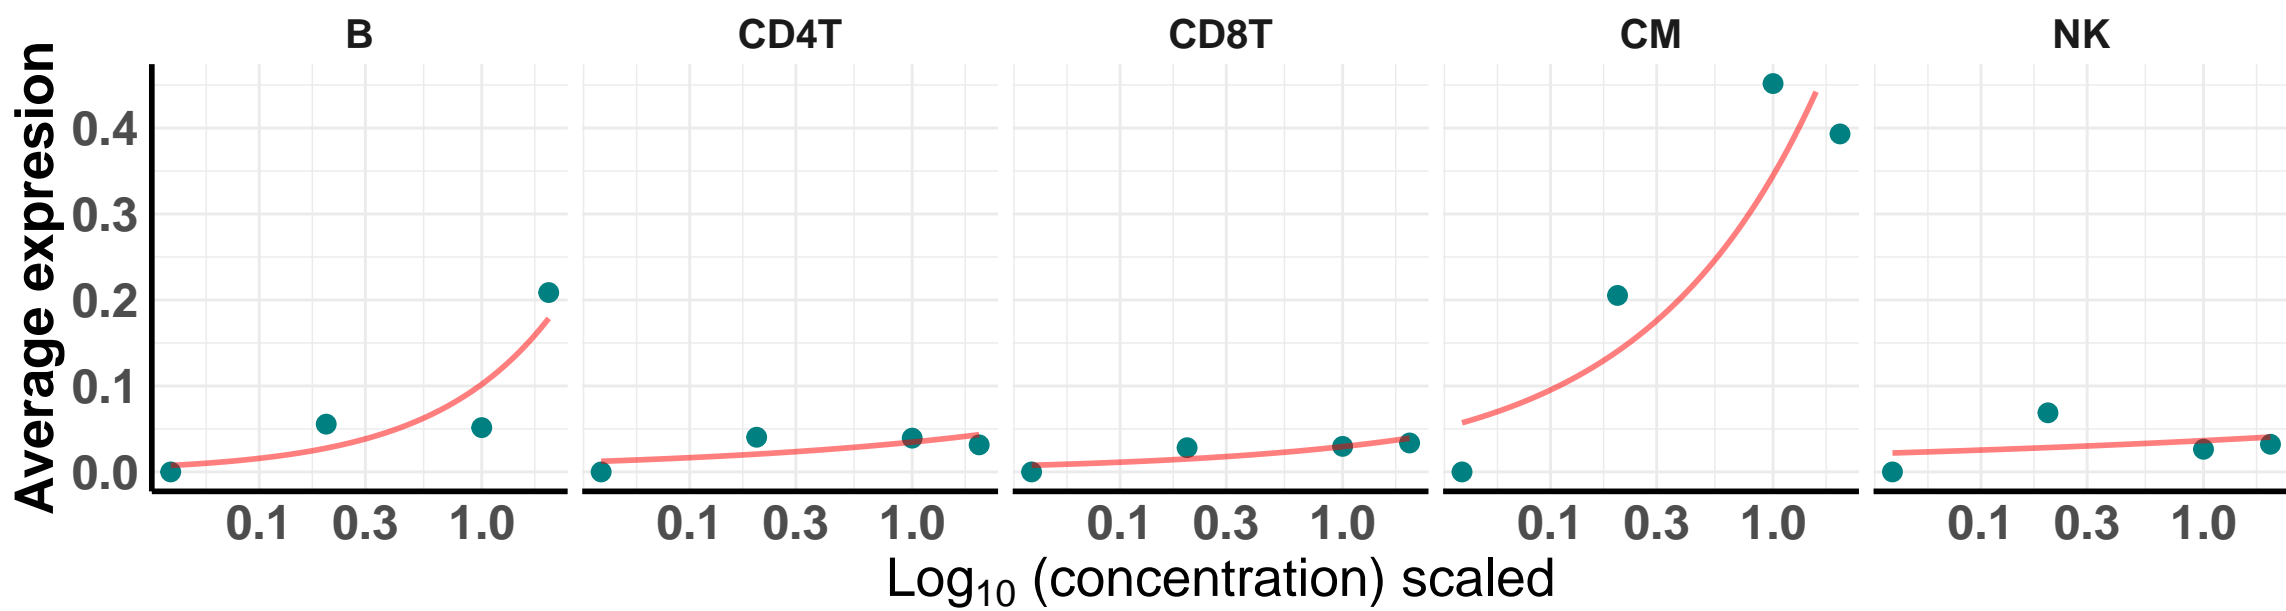

# CD150

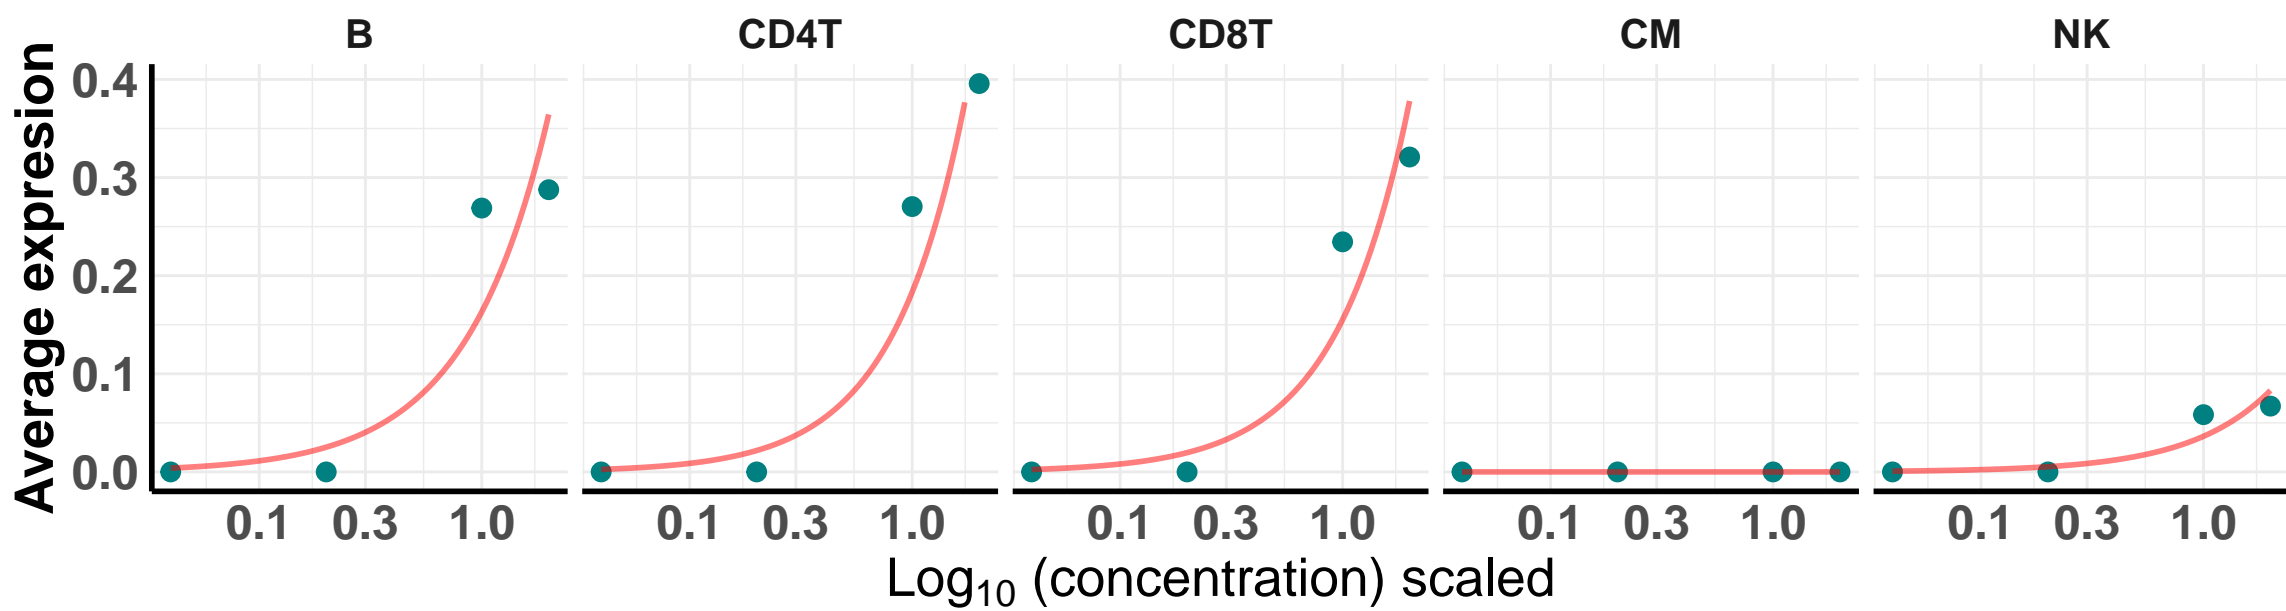

# CD154

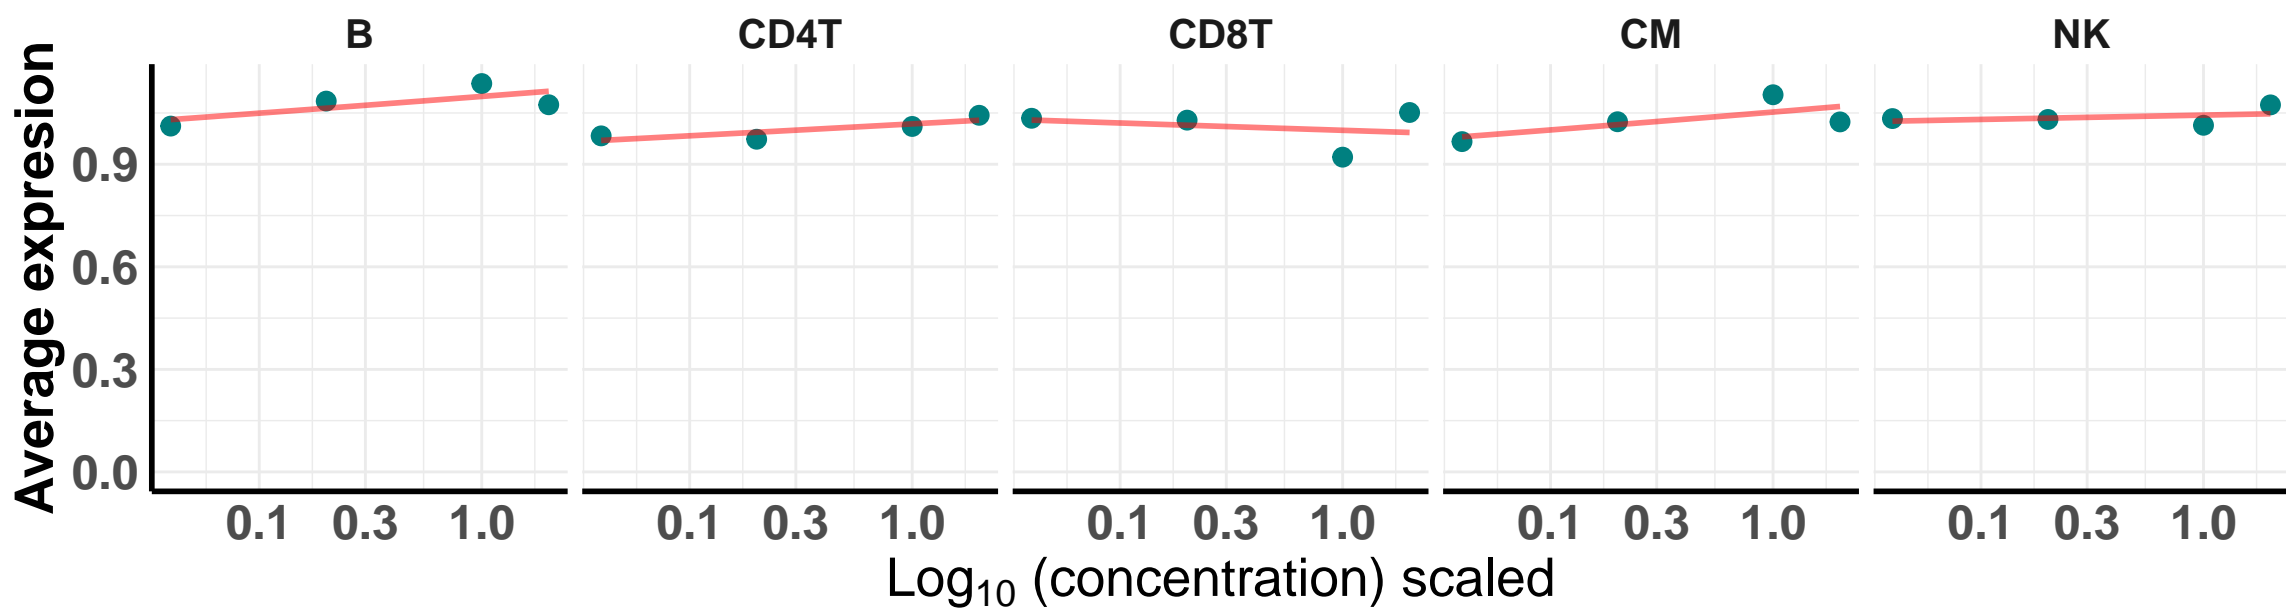

## CD158b

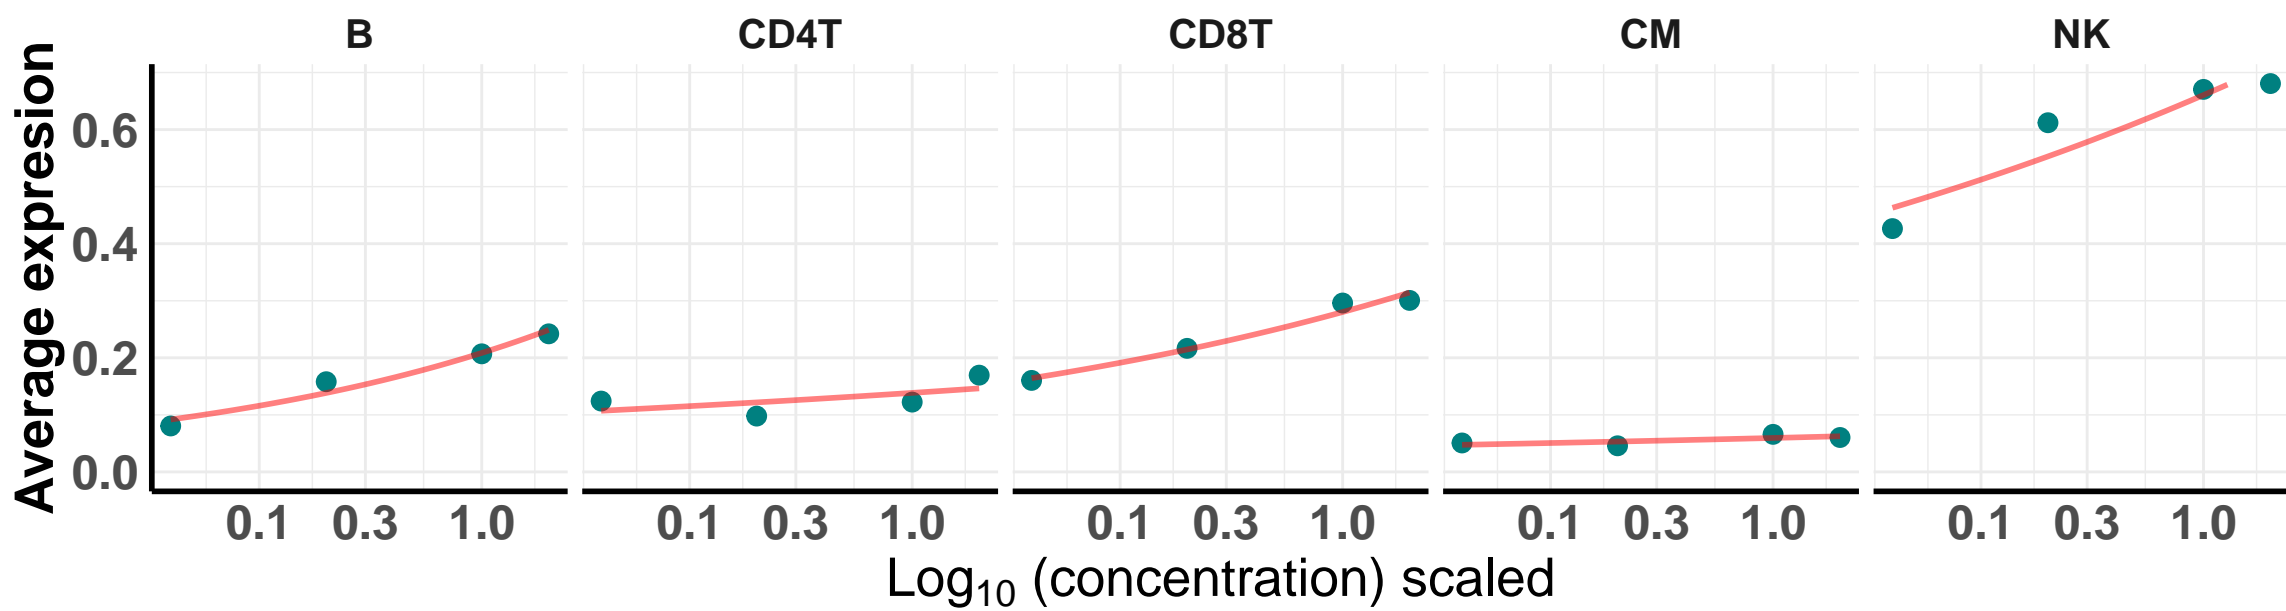

## CD158e1

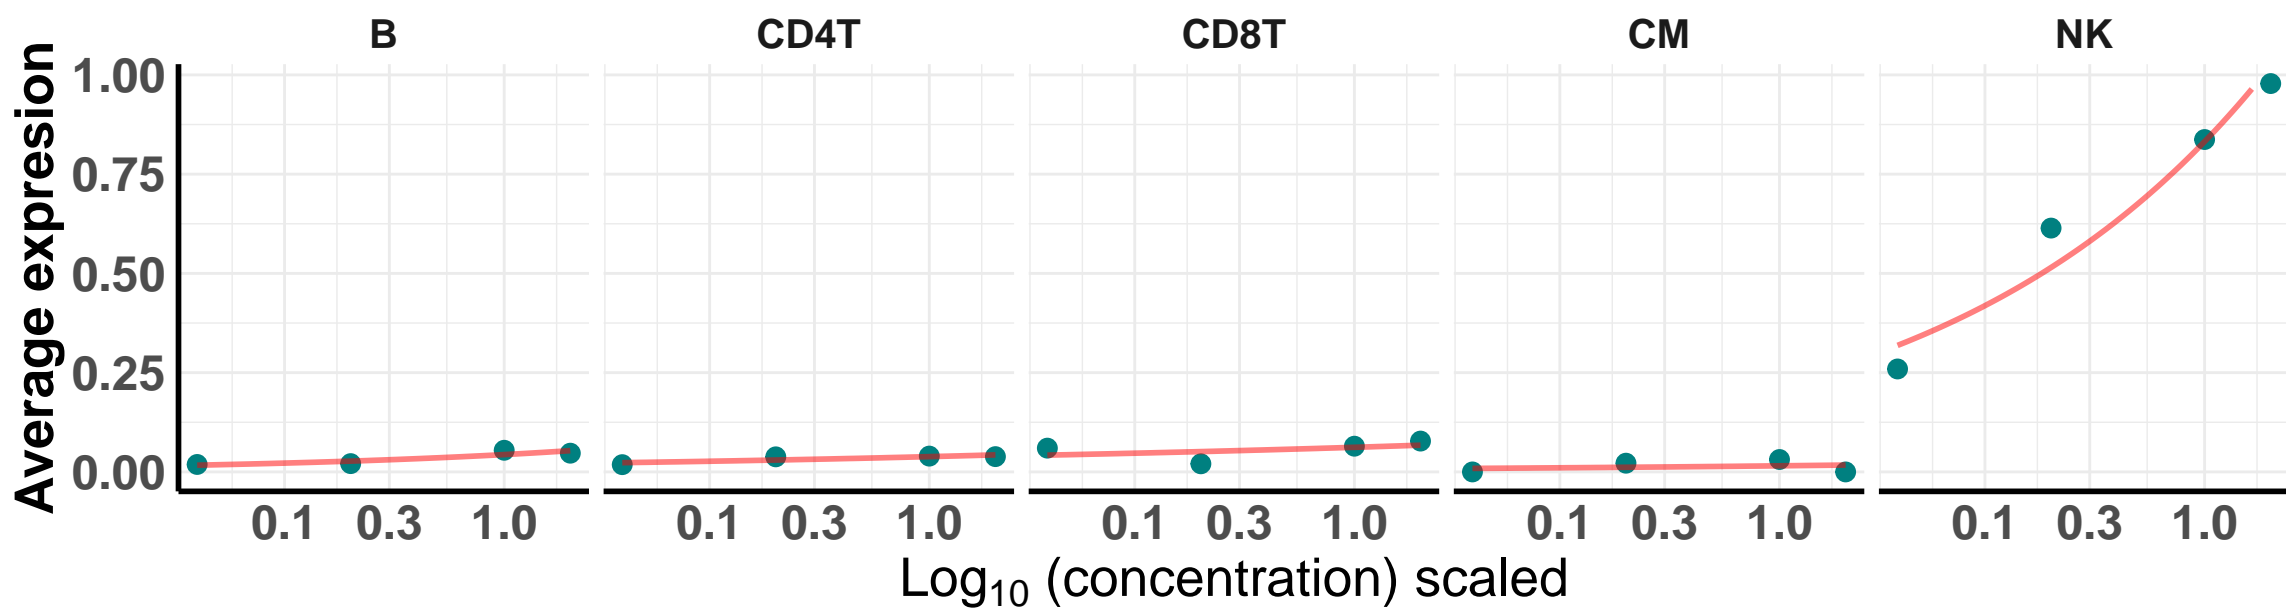

## CD158f

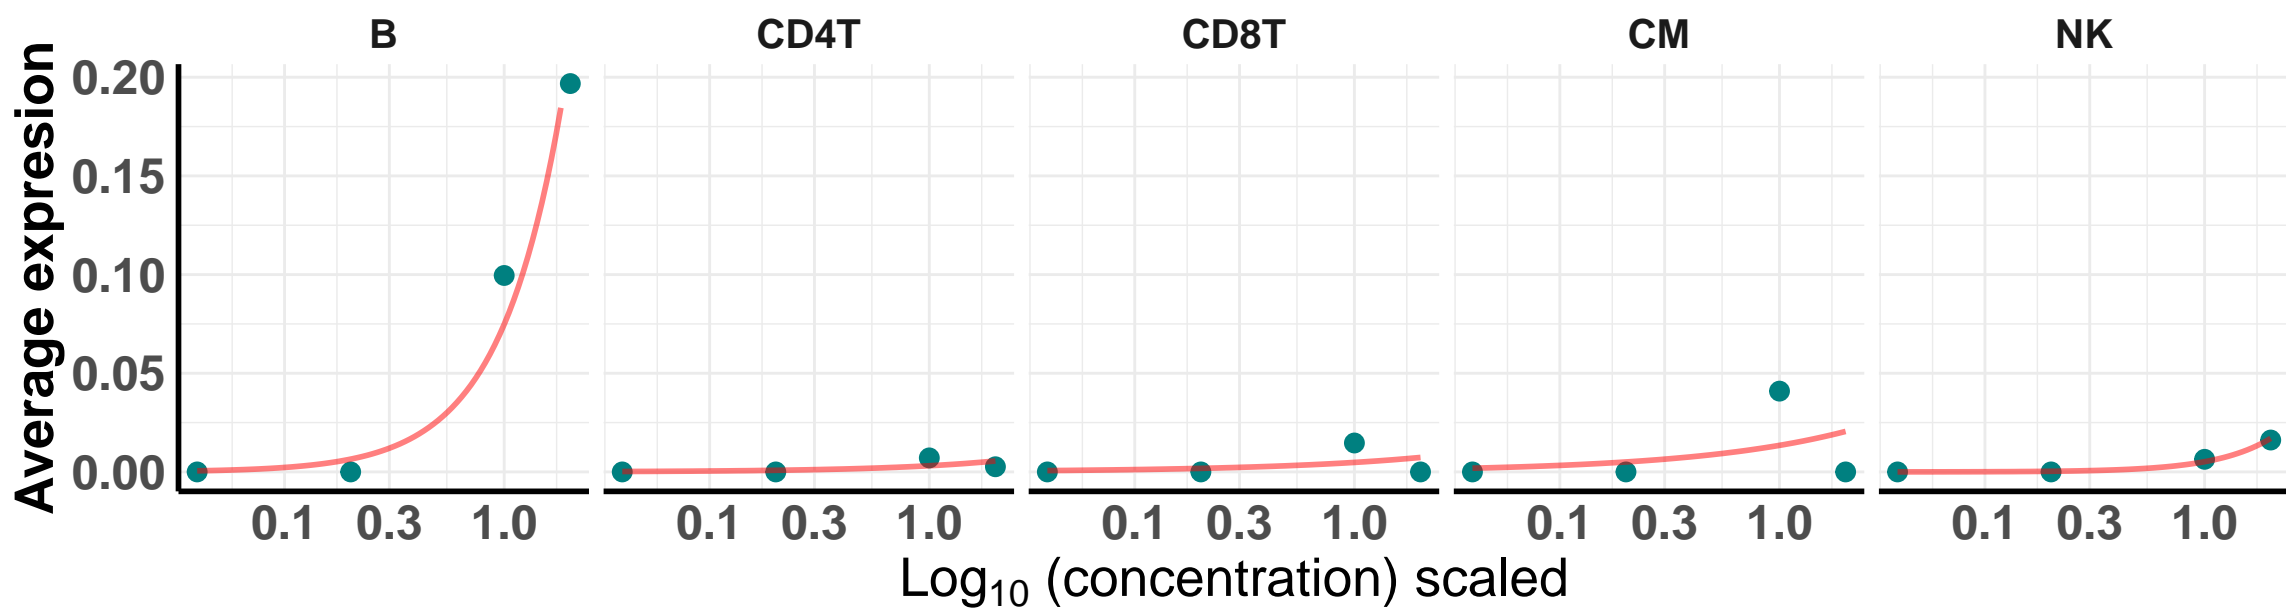

## CD16

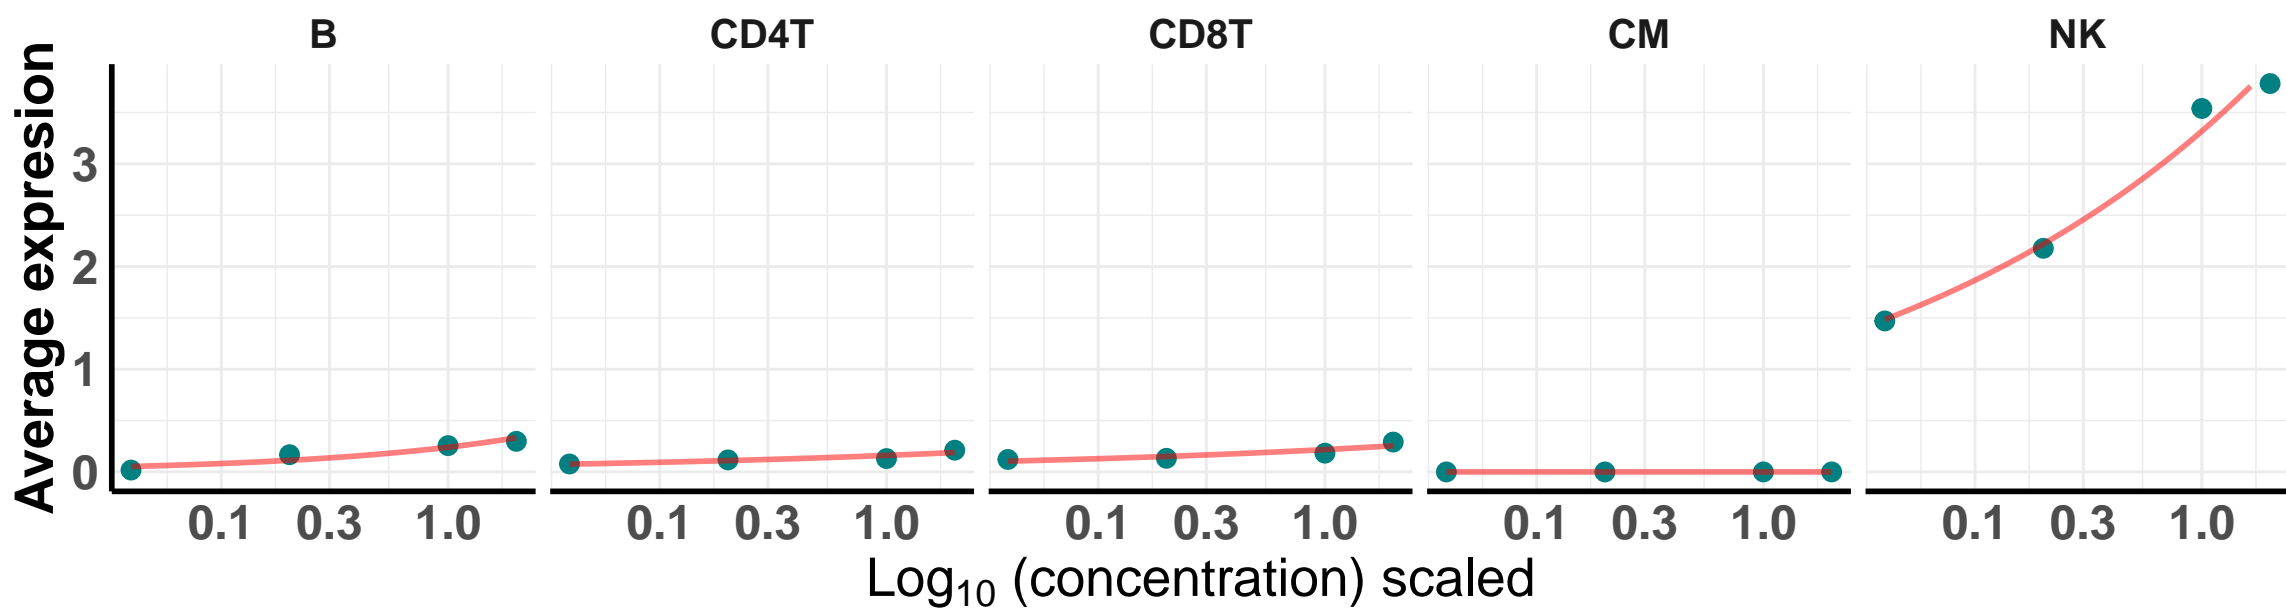

# CD18

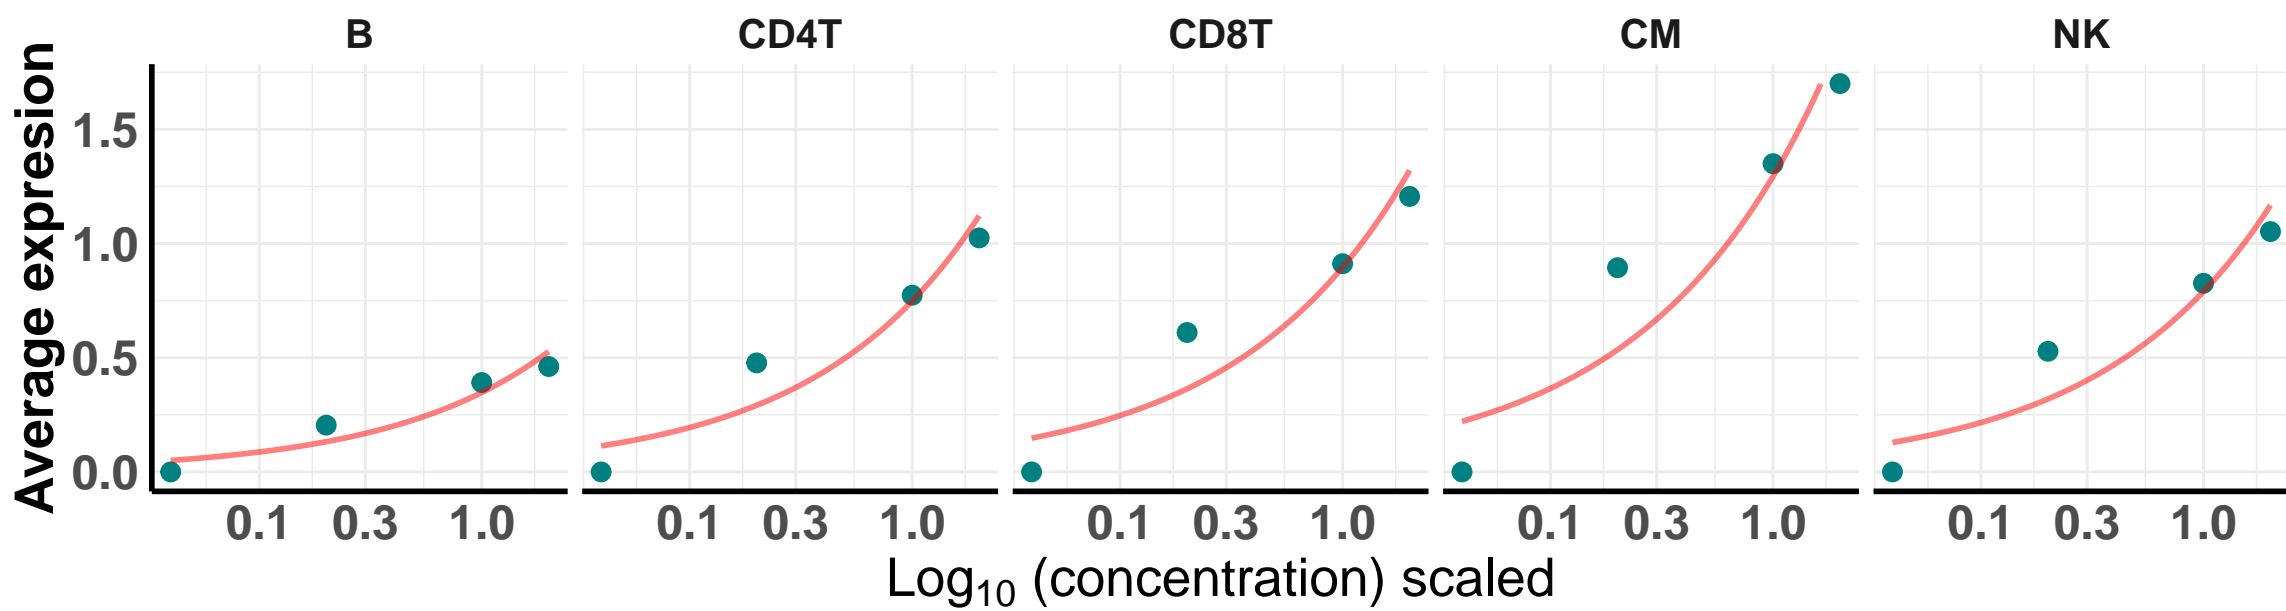

# CD183

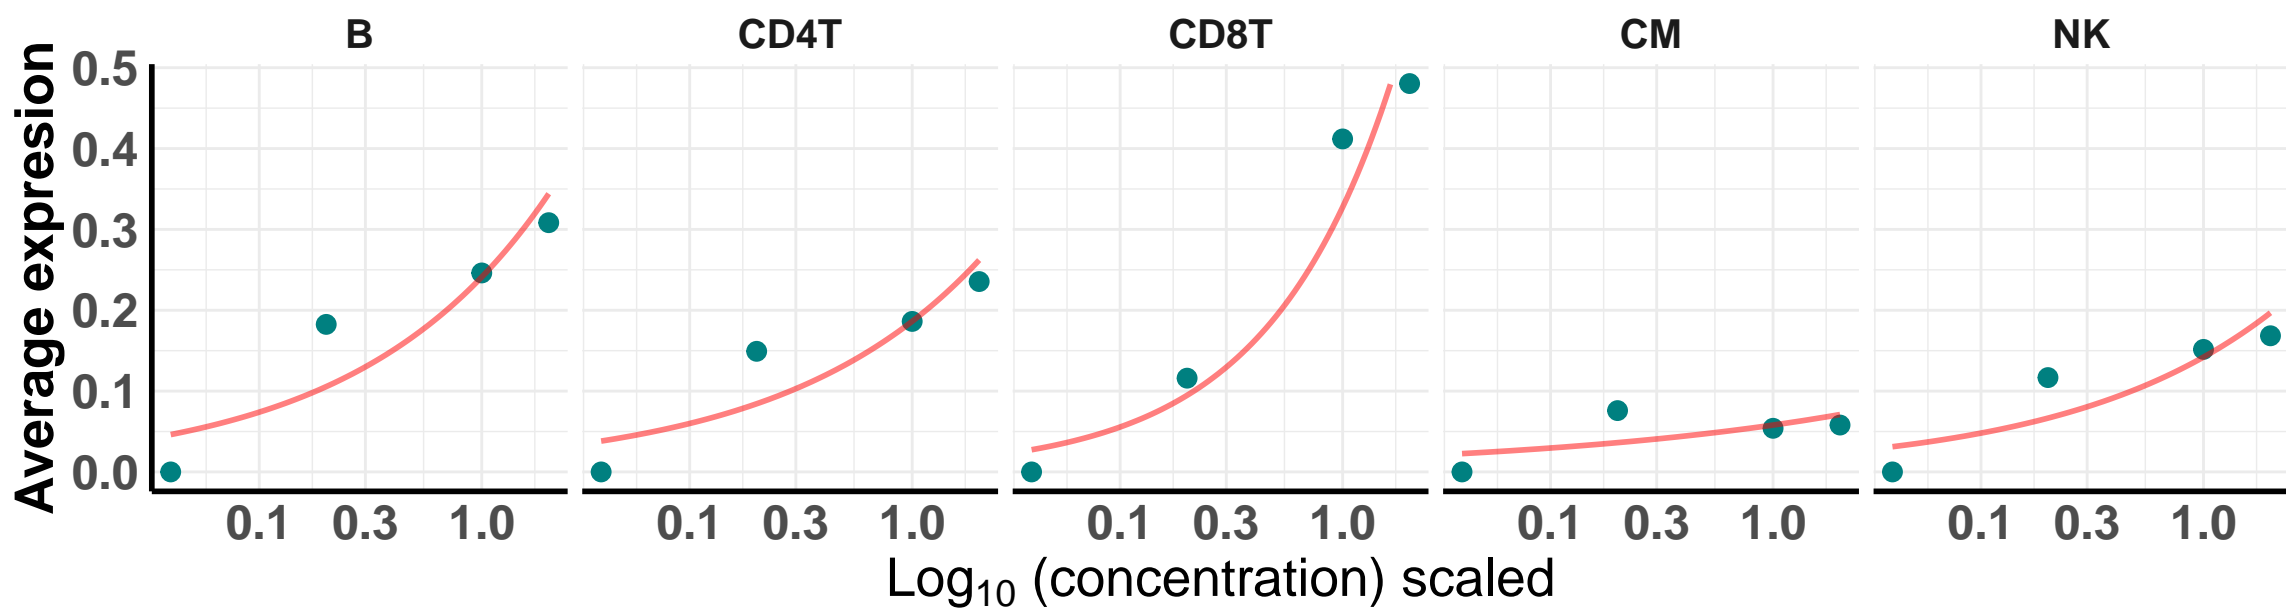

# CD185

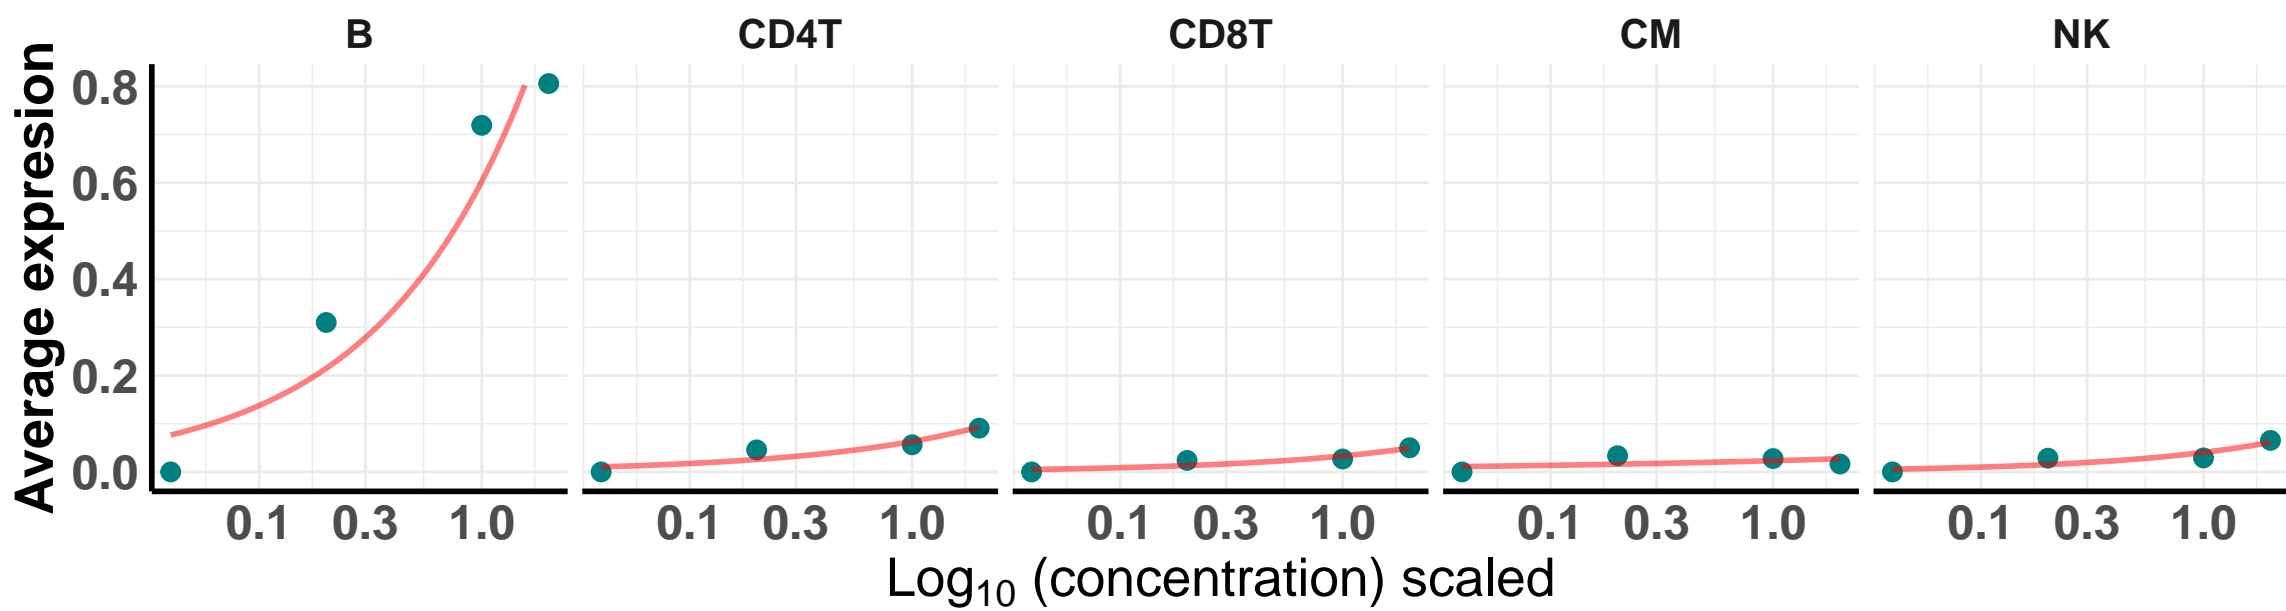

# CD19

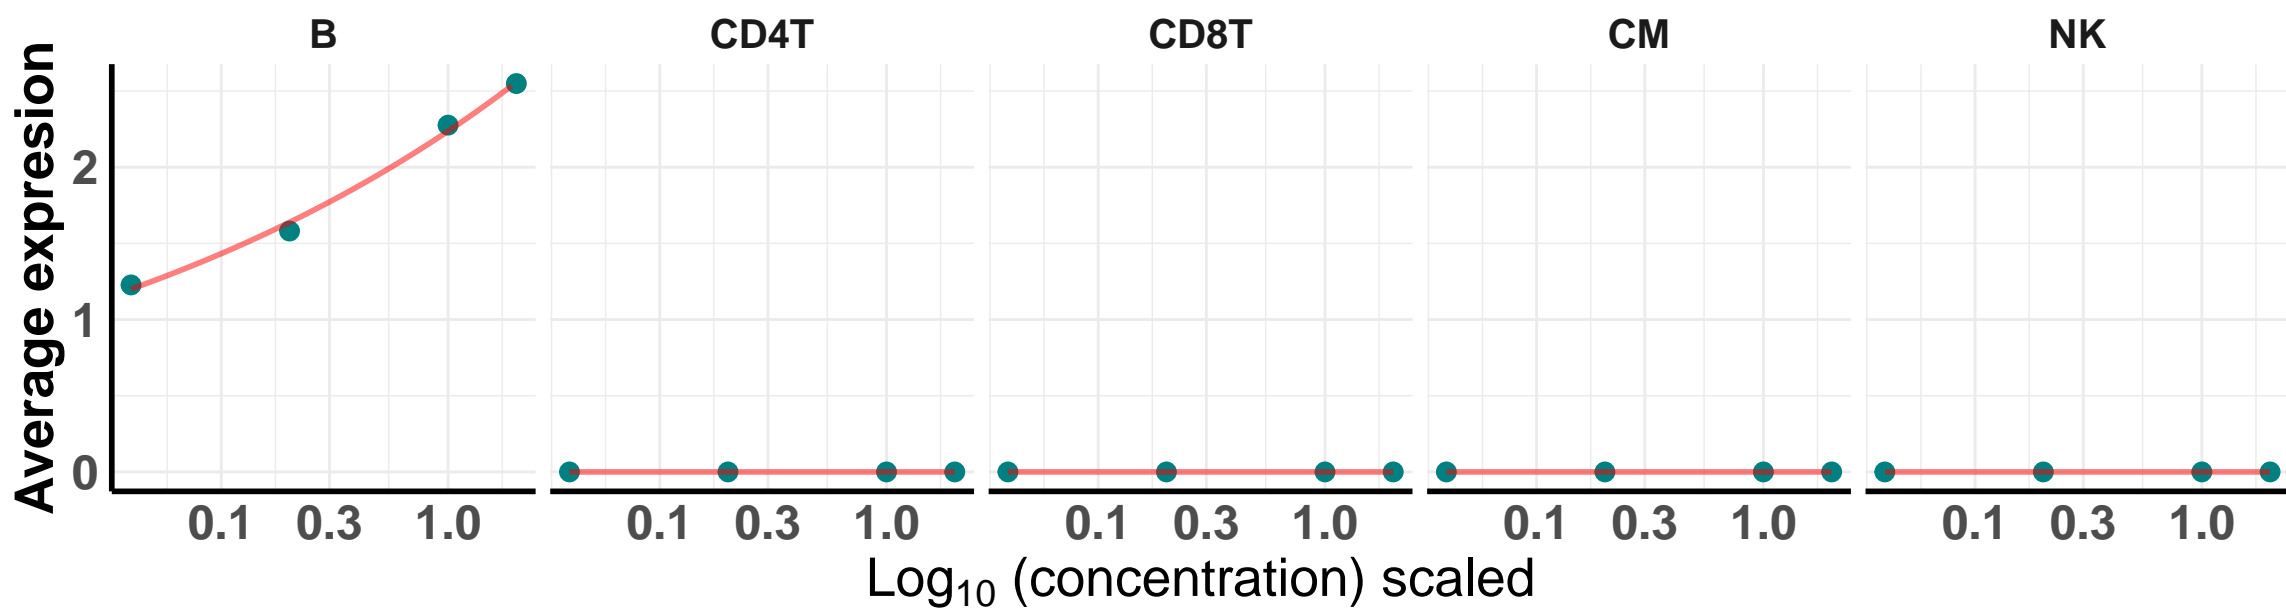

## CD196

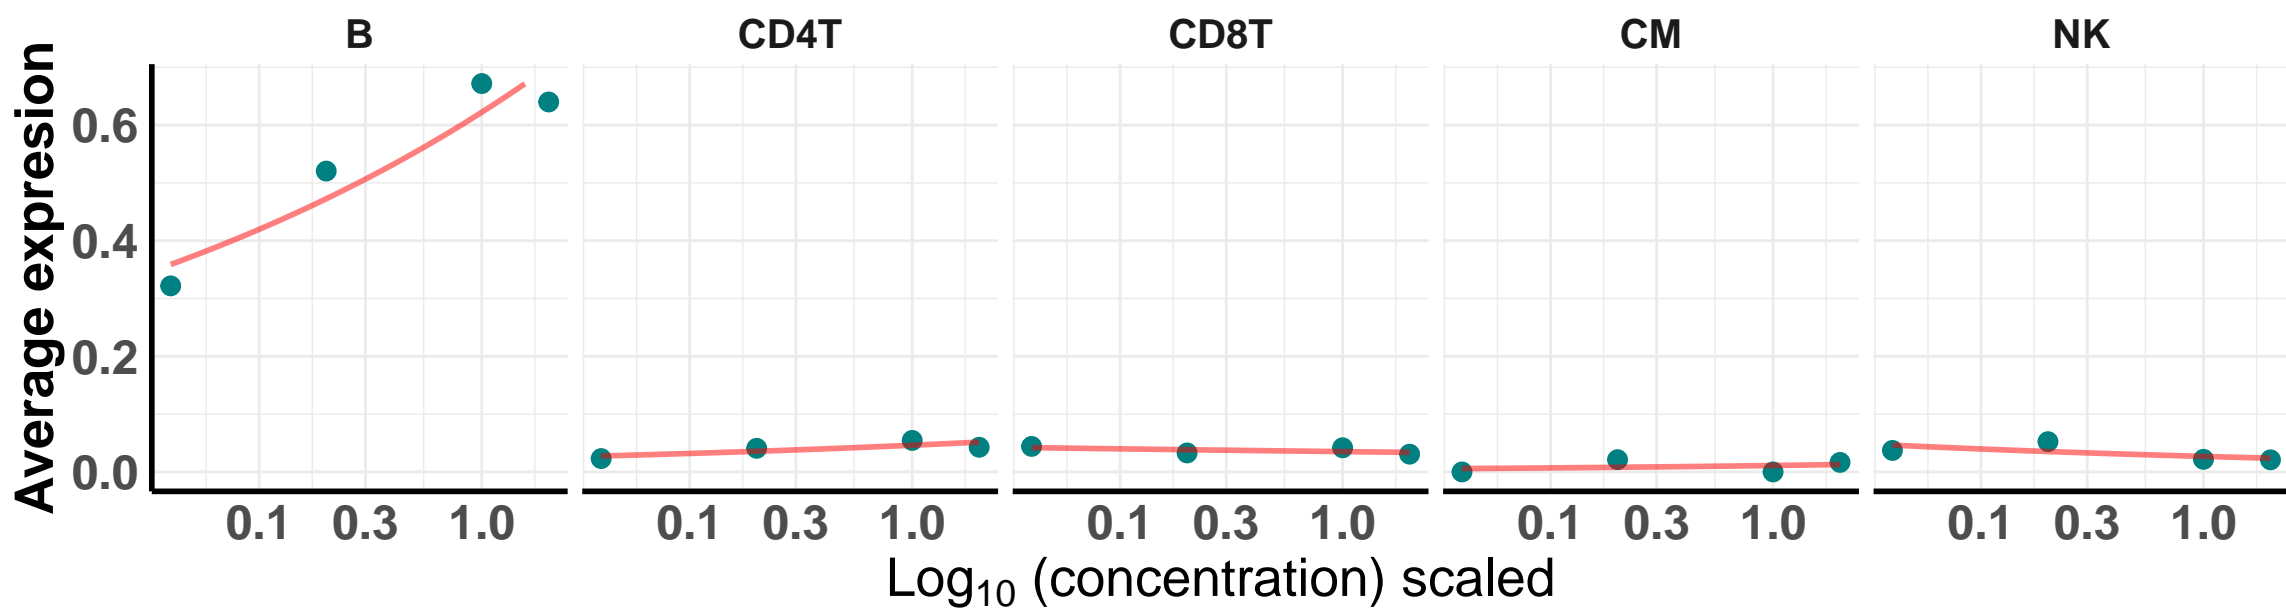

## CD197

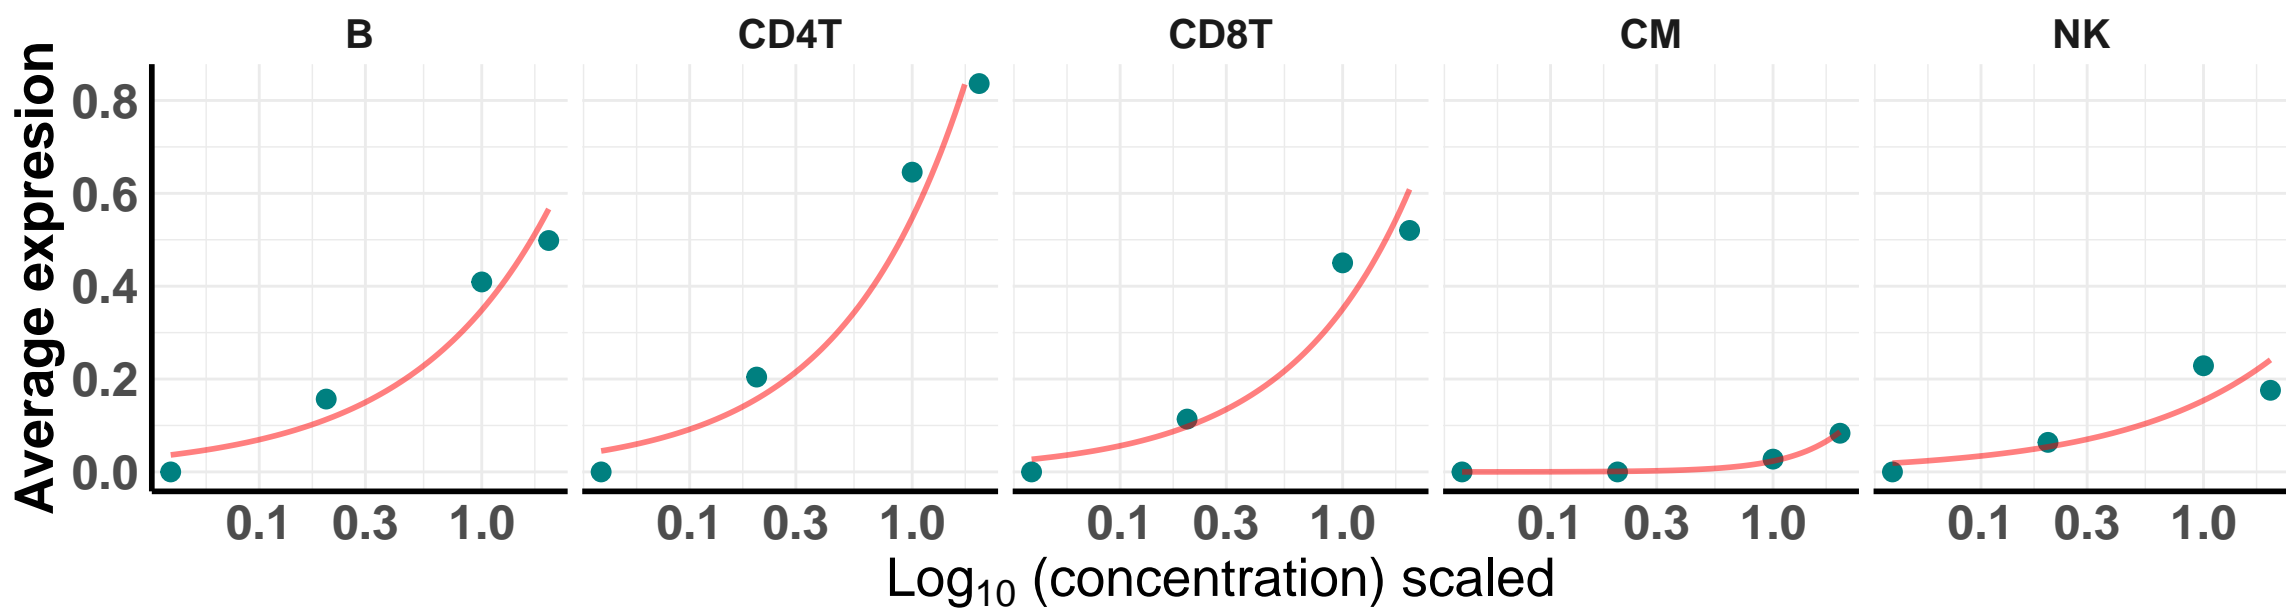

## CD1c

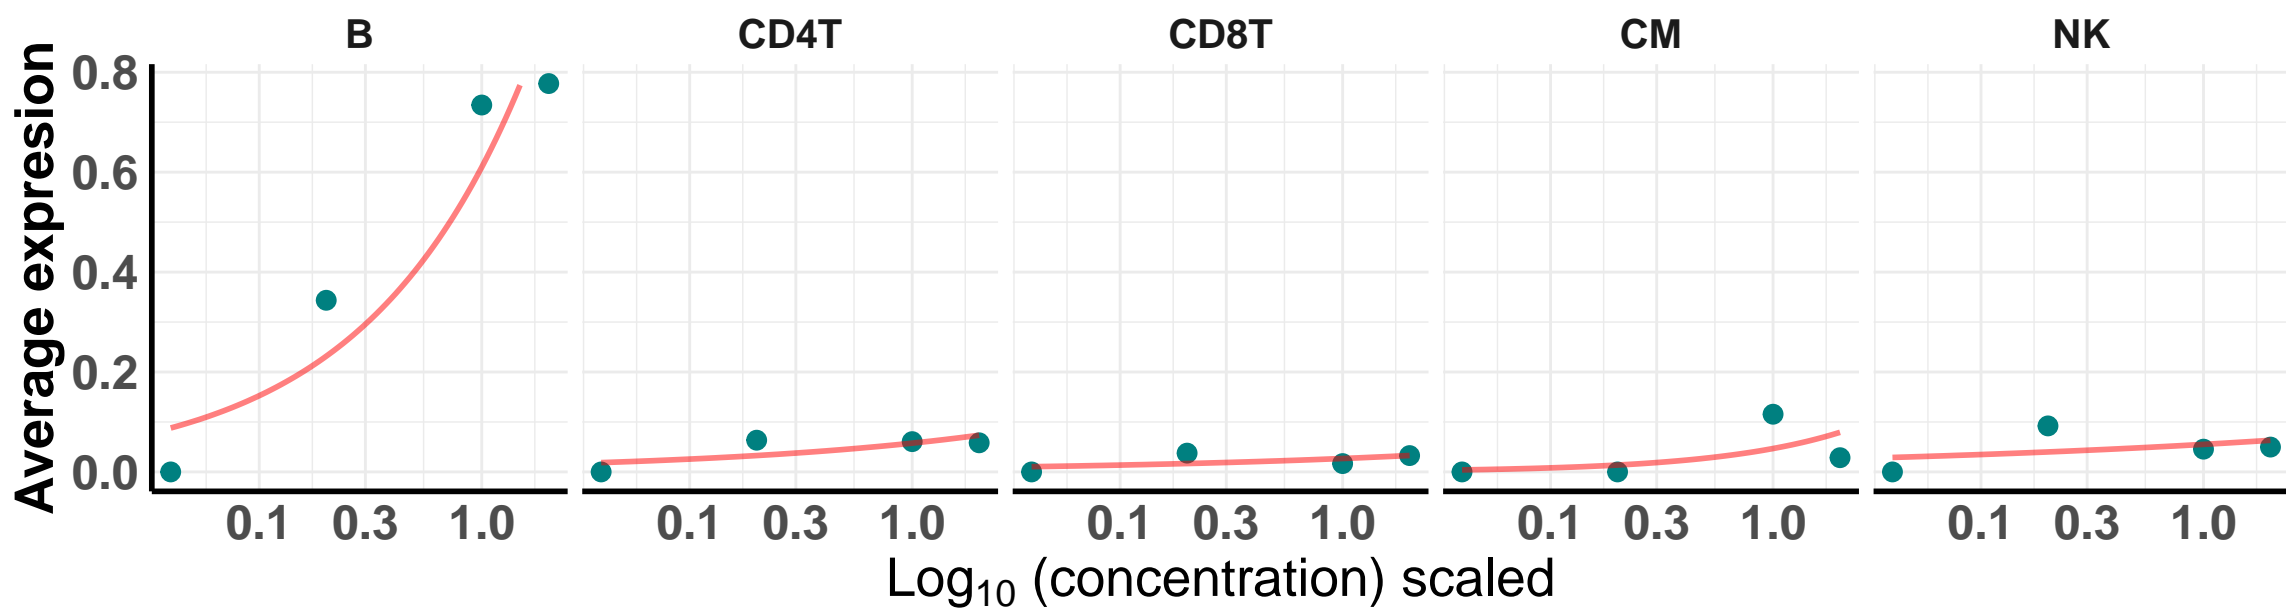

## CD1d

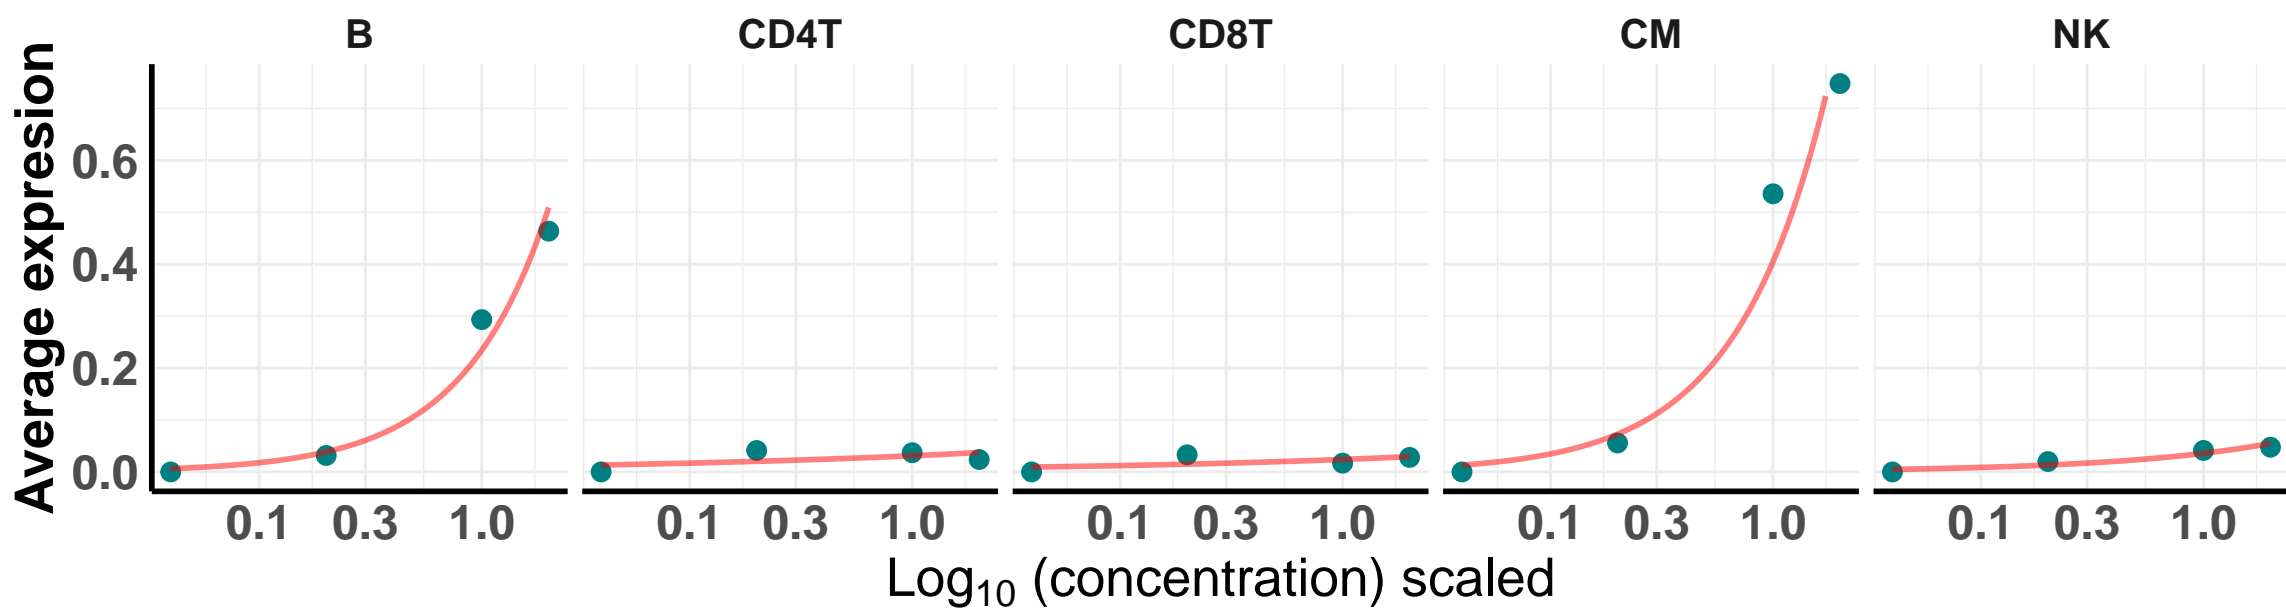

## CD21

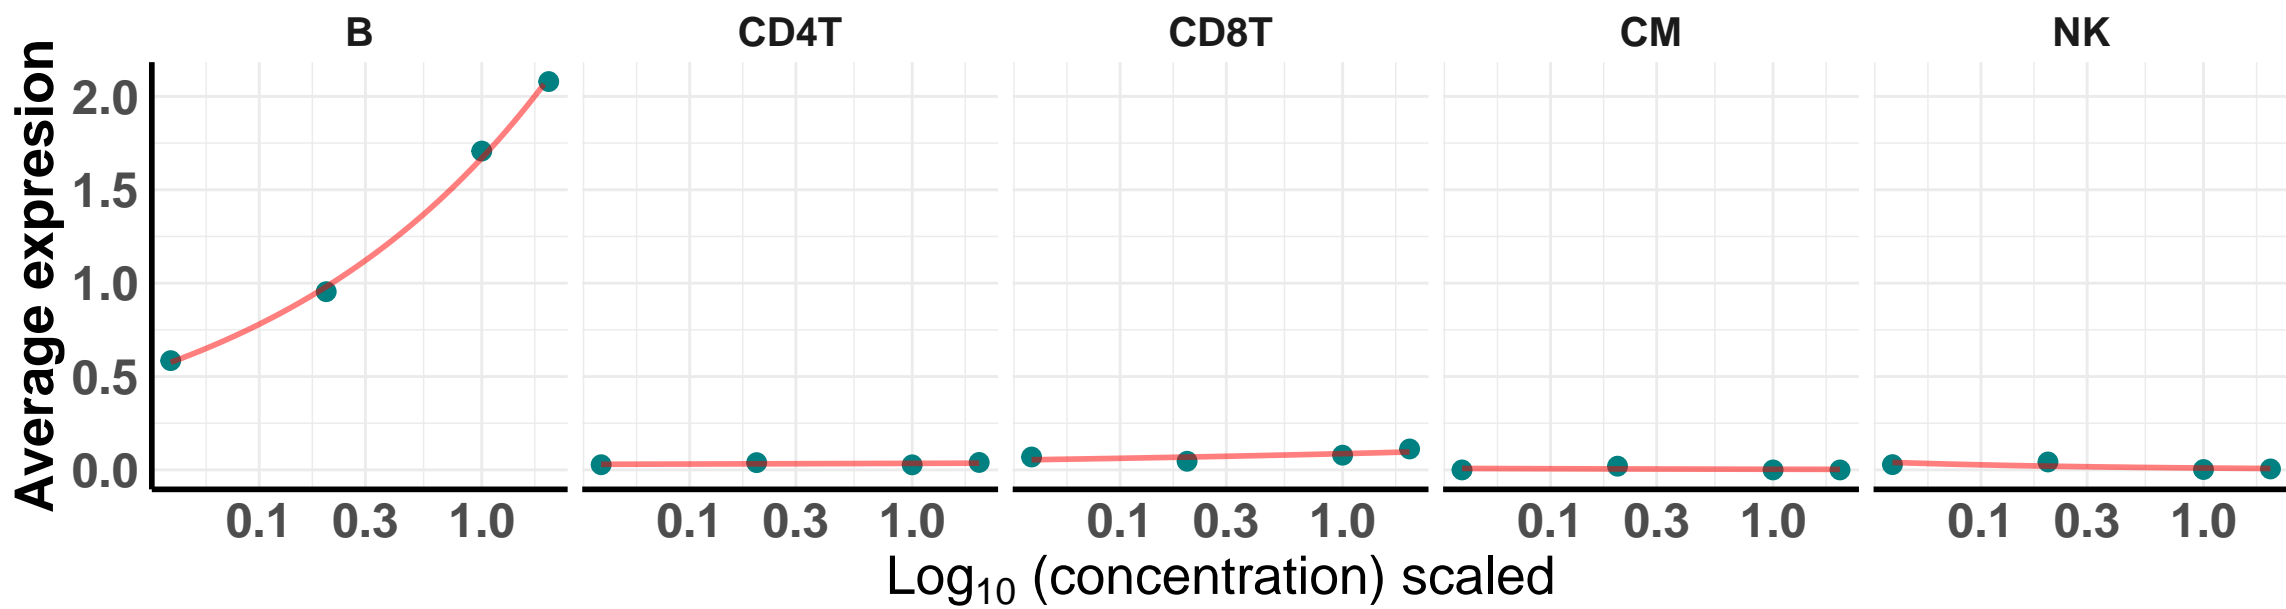

## CD22

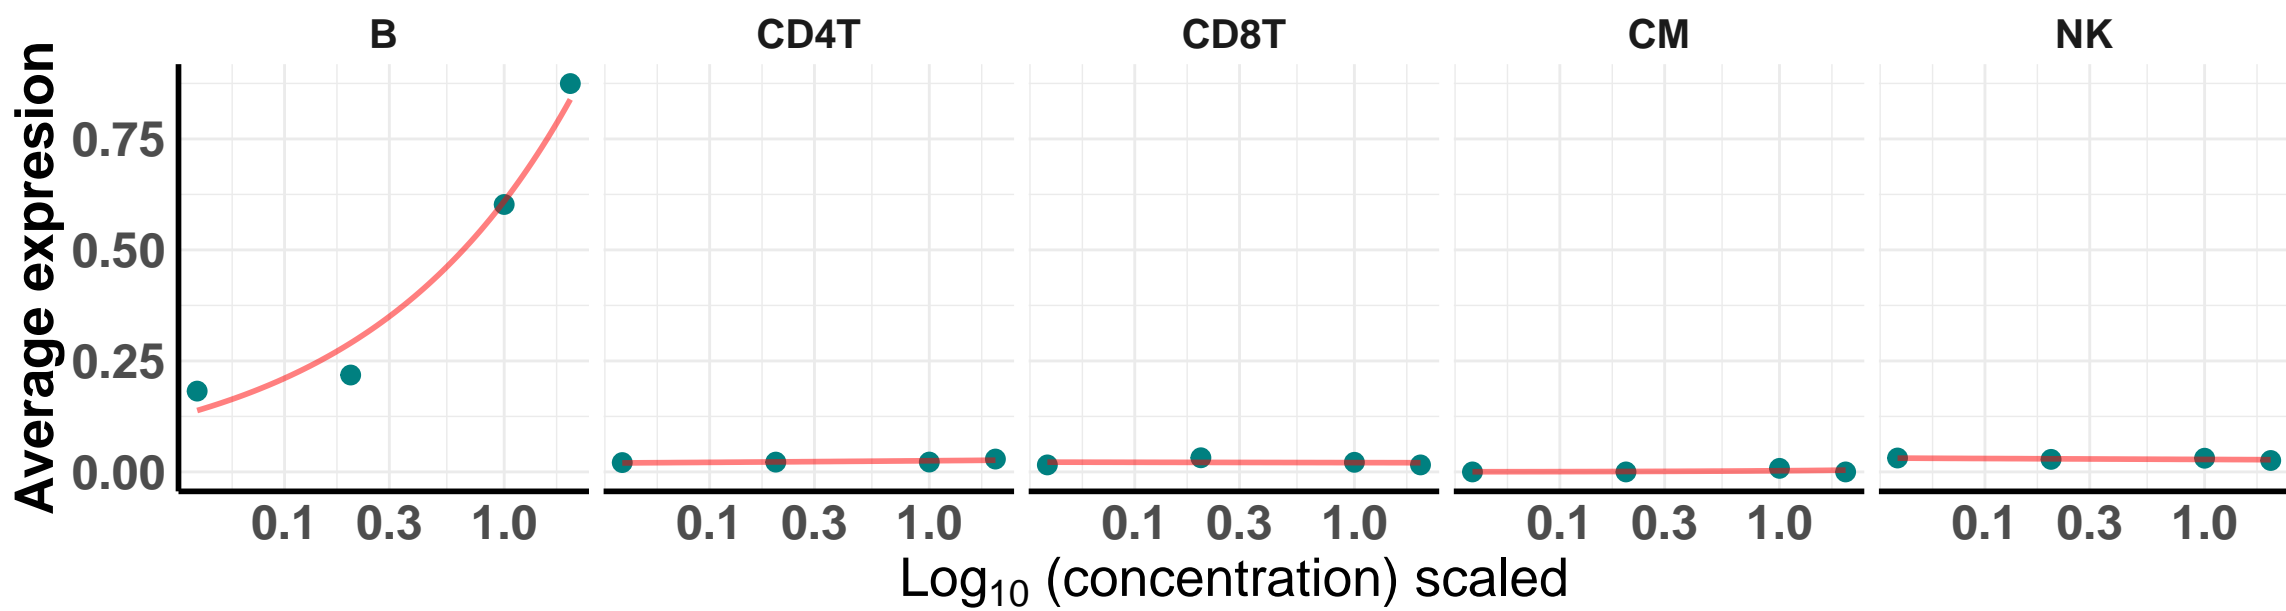

## CD223

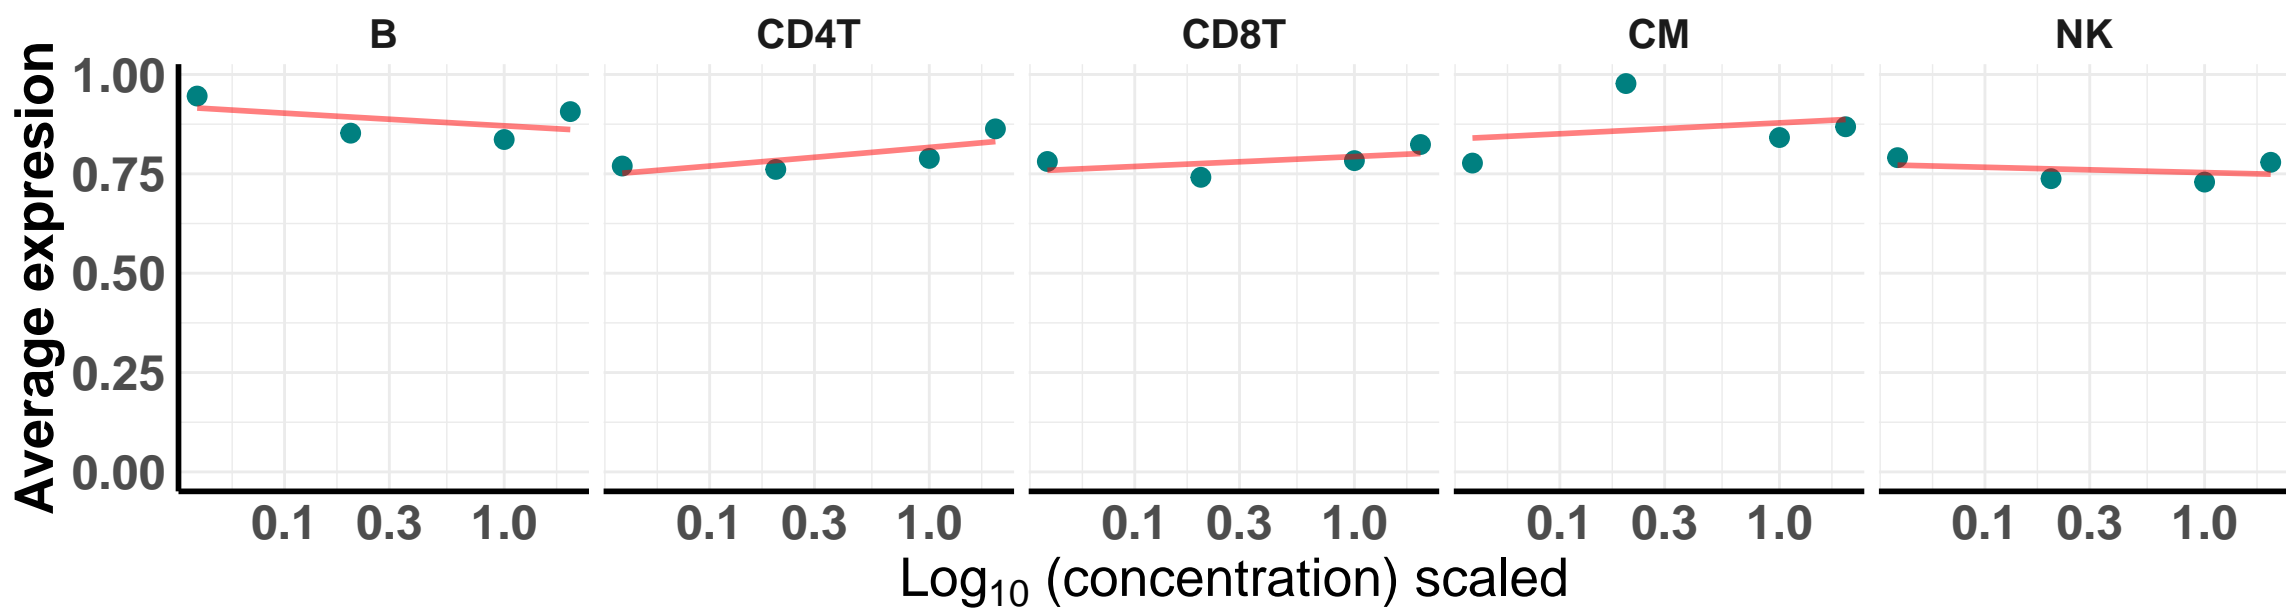

## CD224

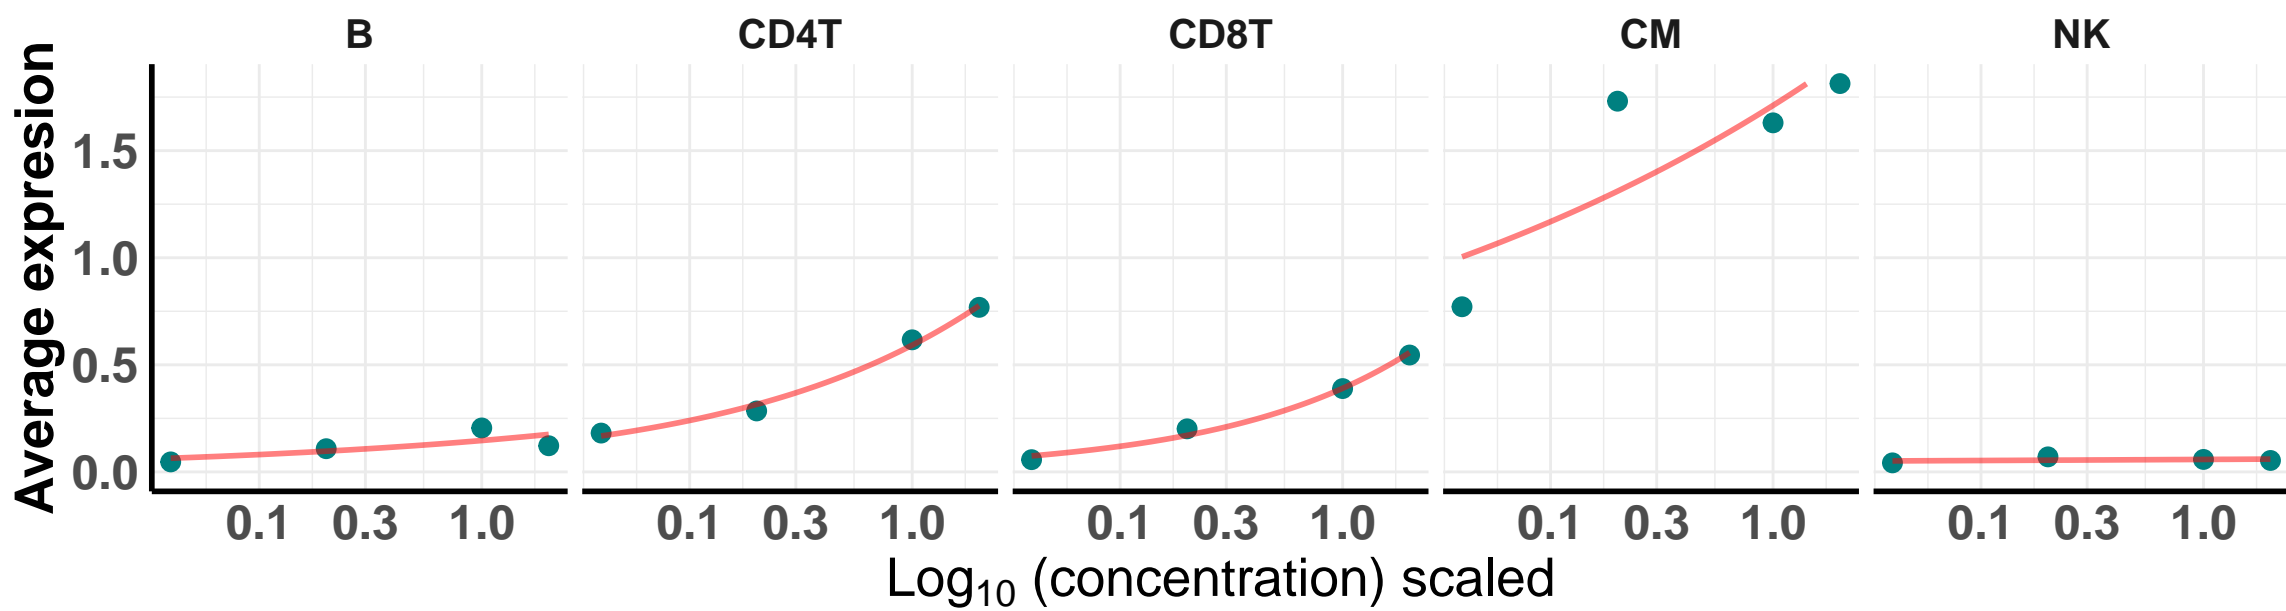

## CD24

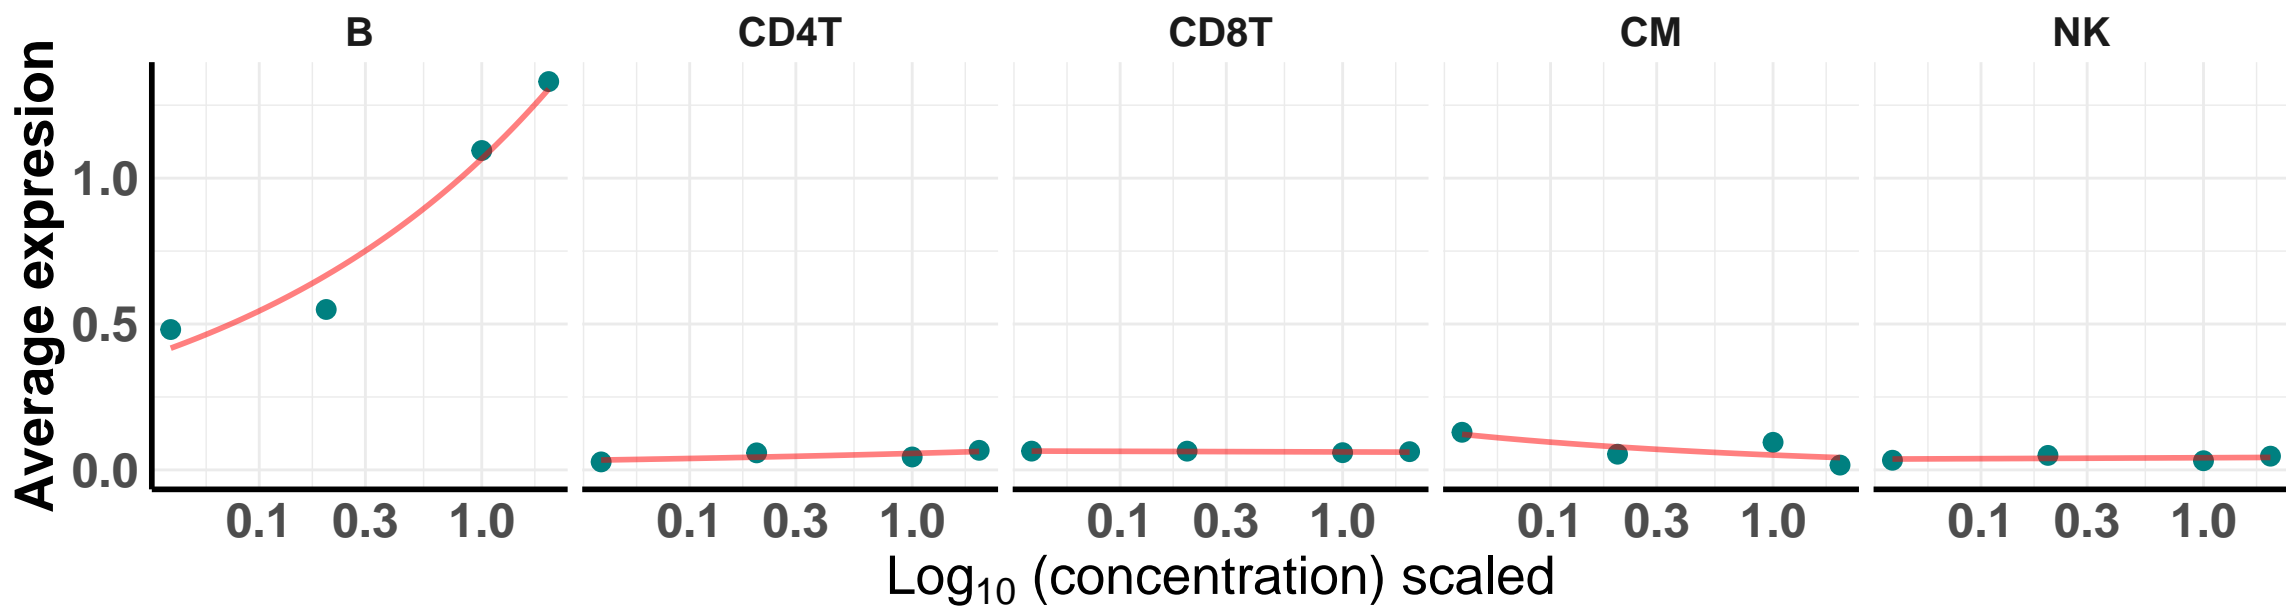

## CD244

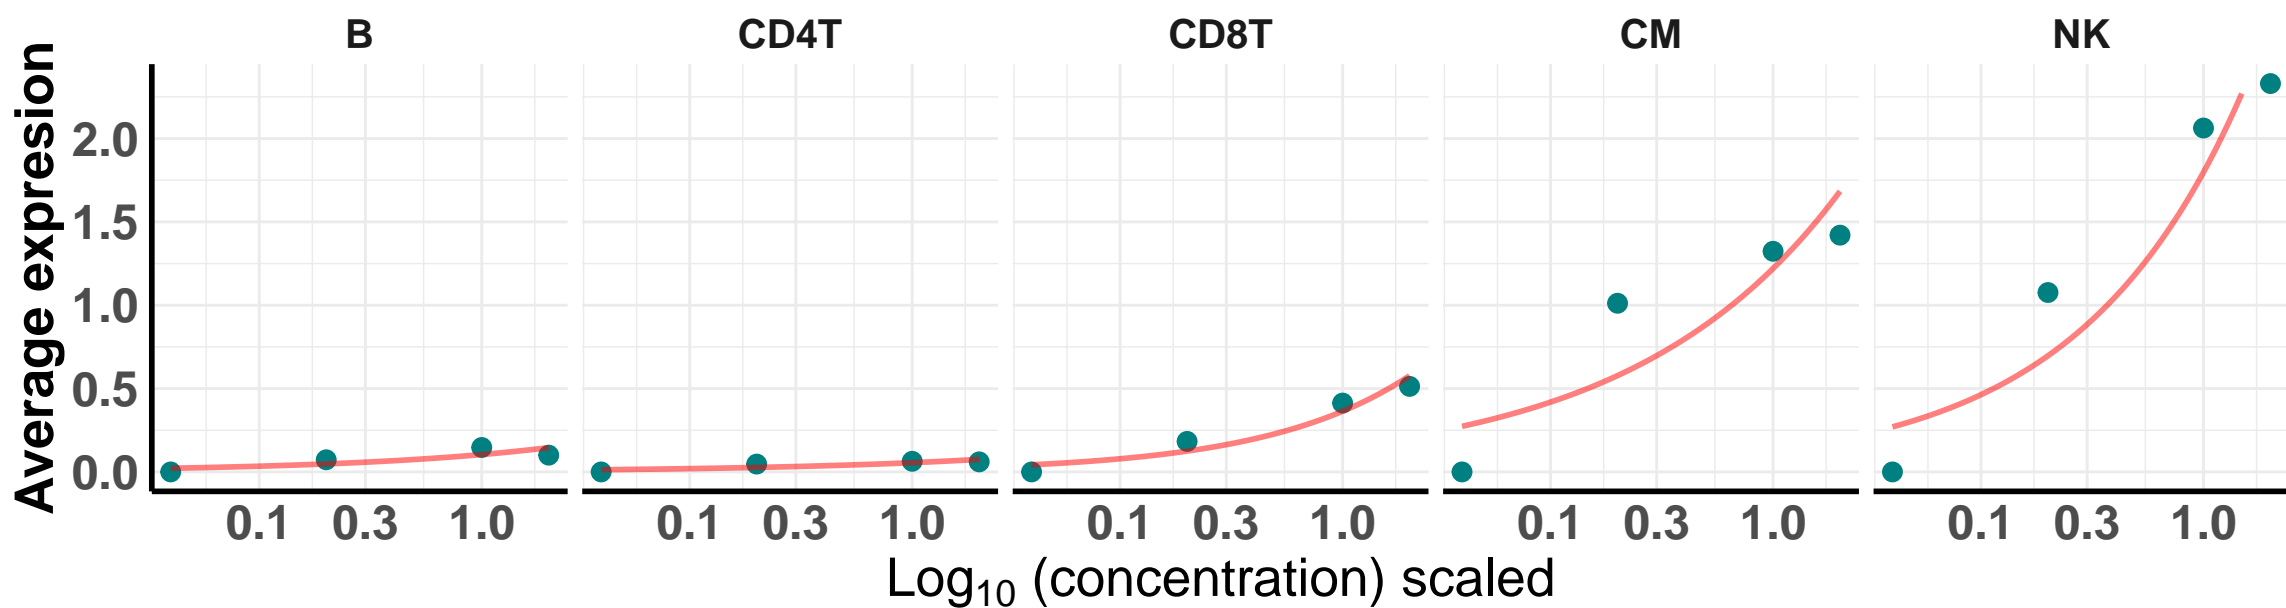

## CD25

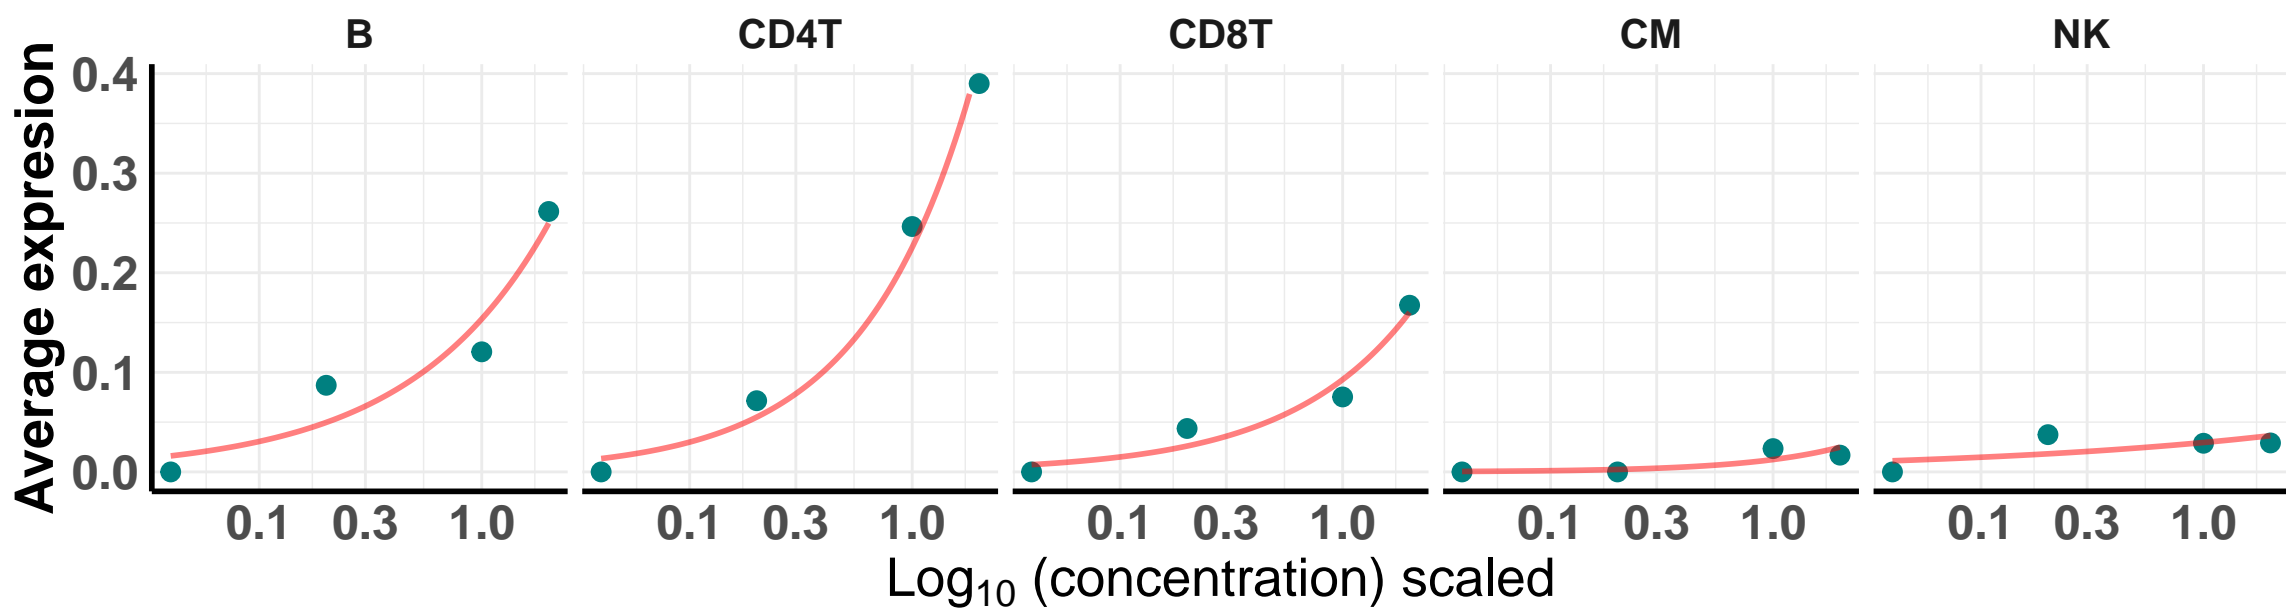

## CD254

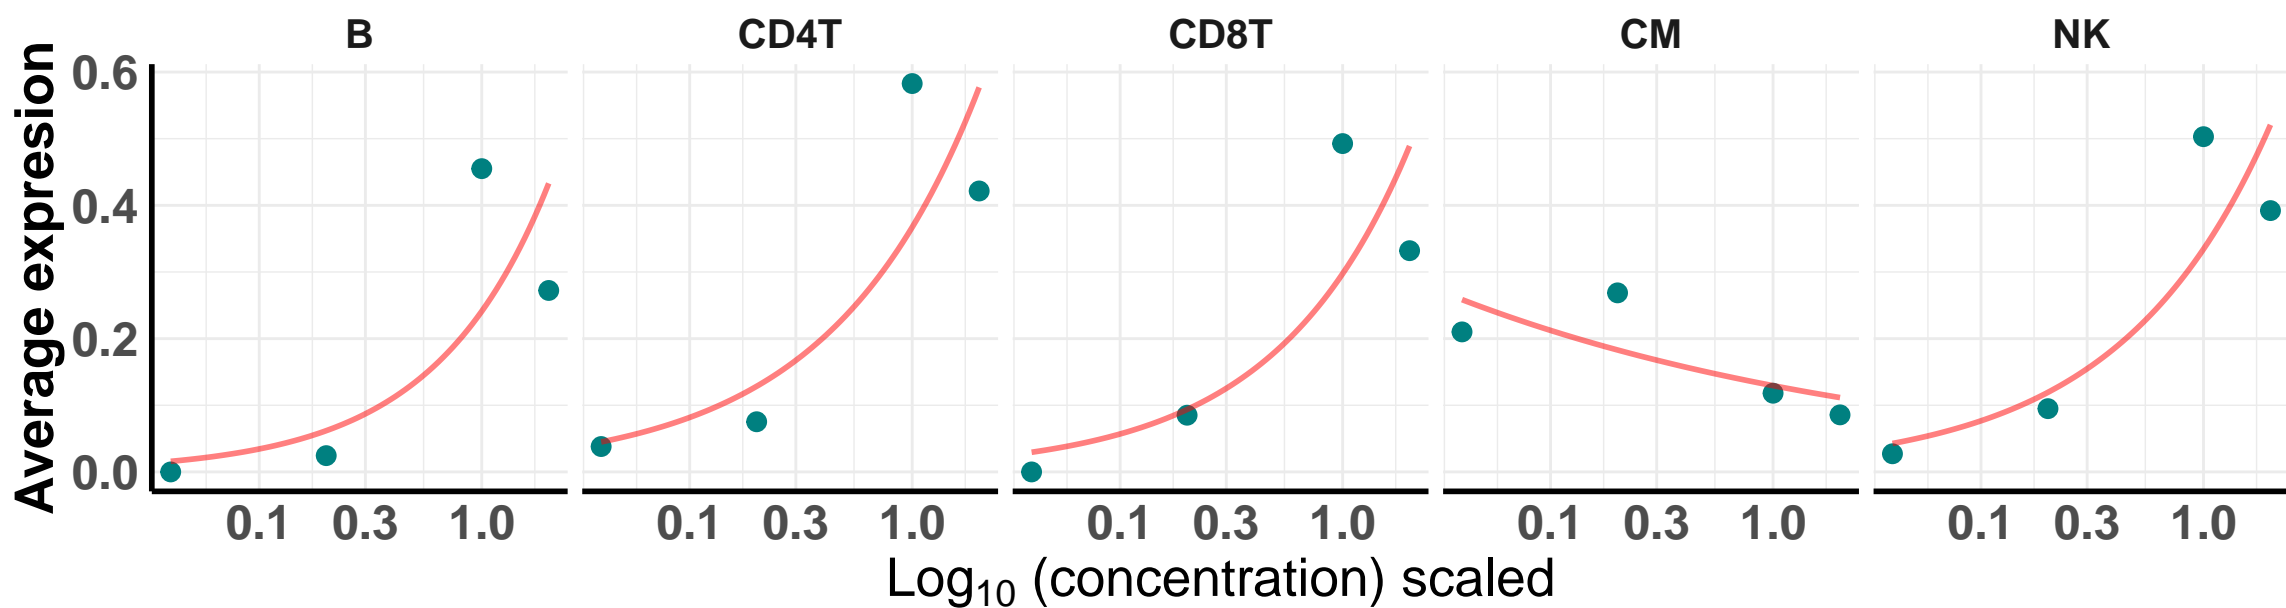



## CD268

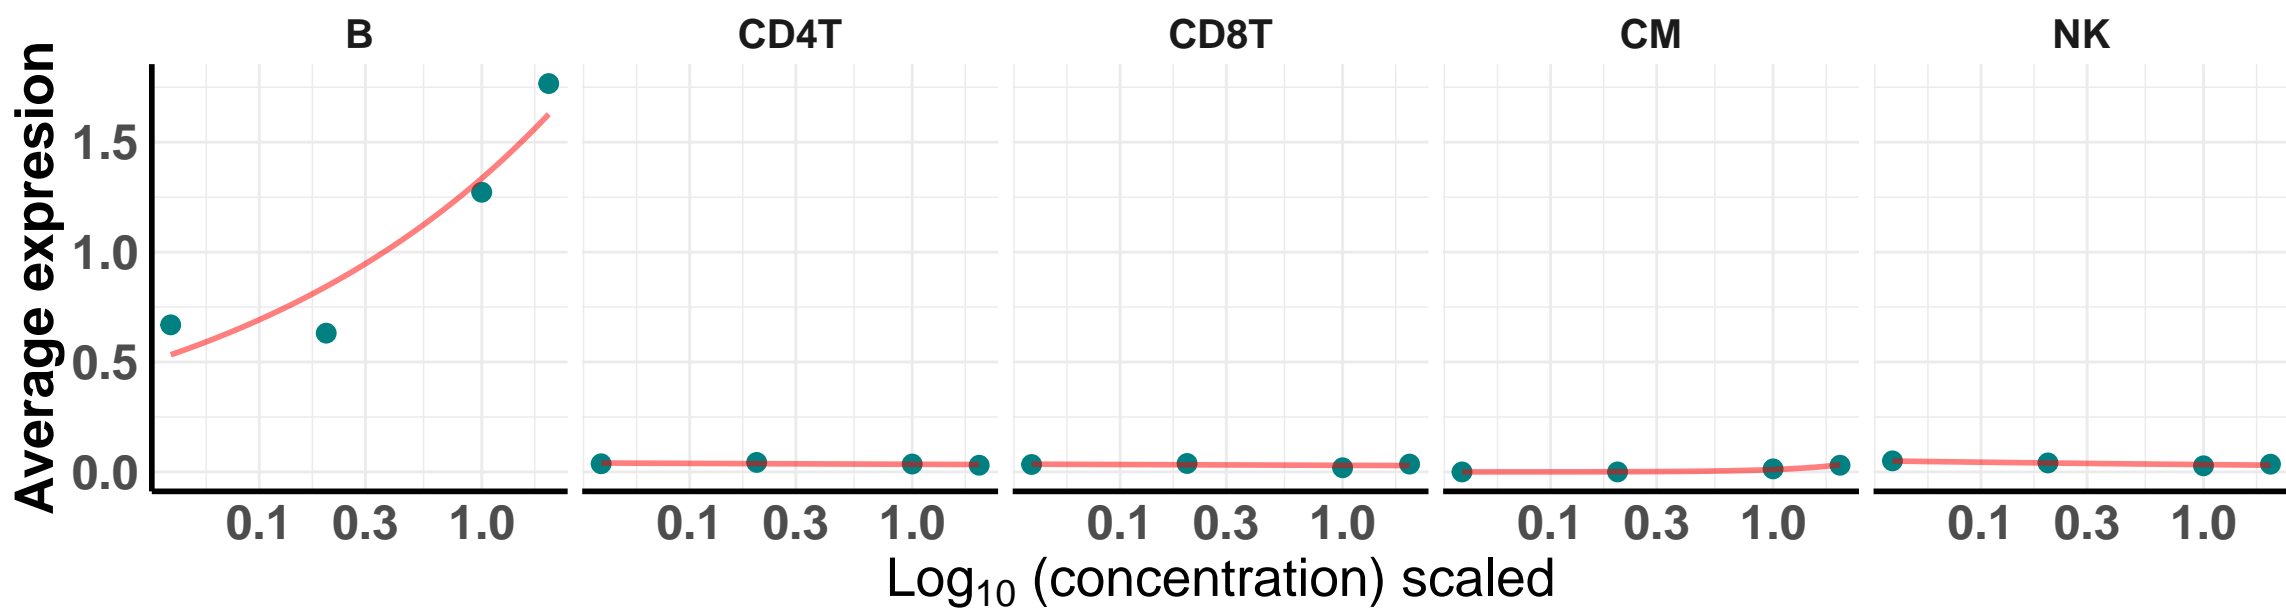

## CD27

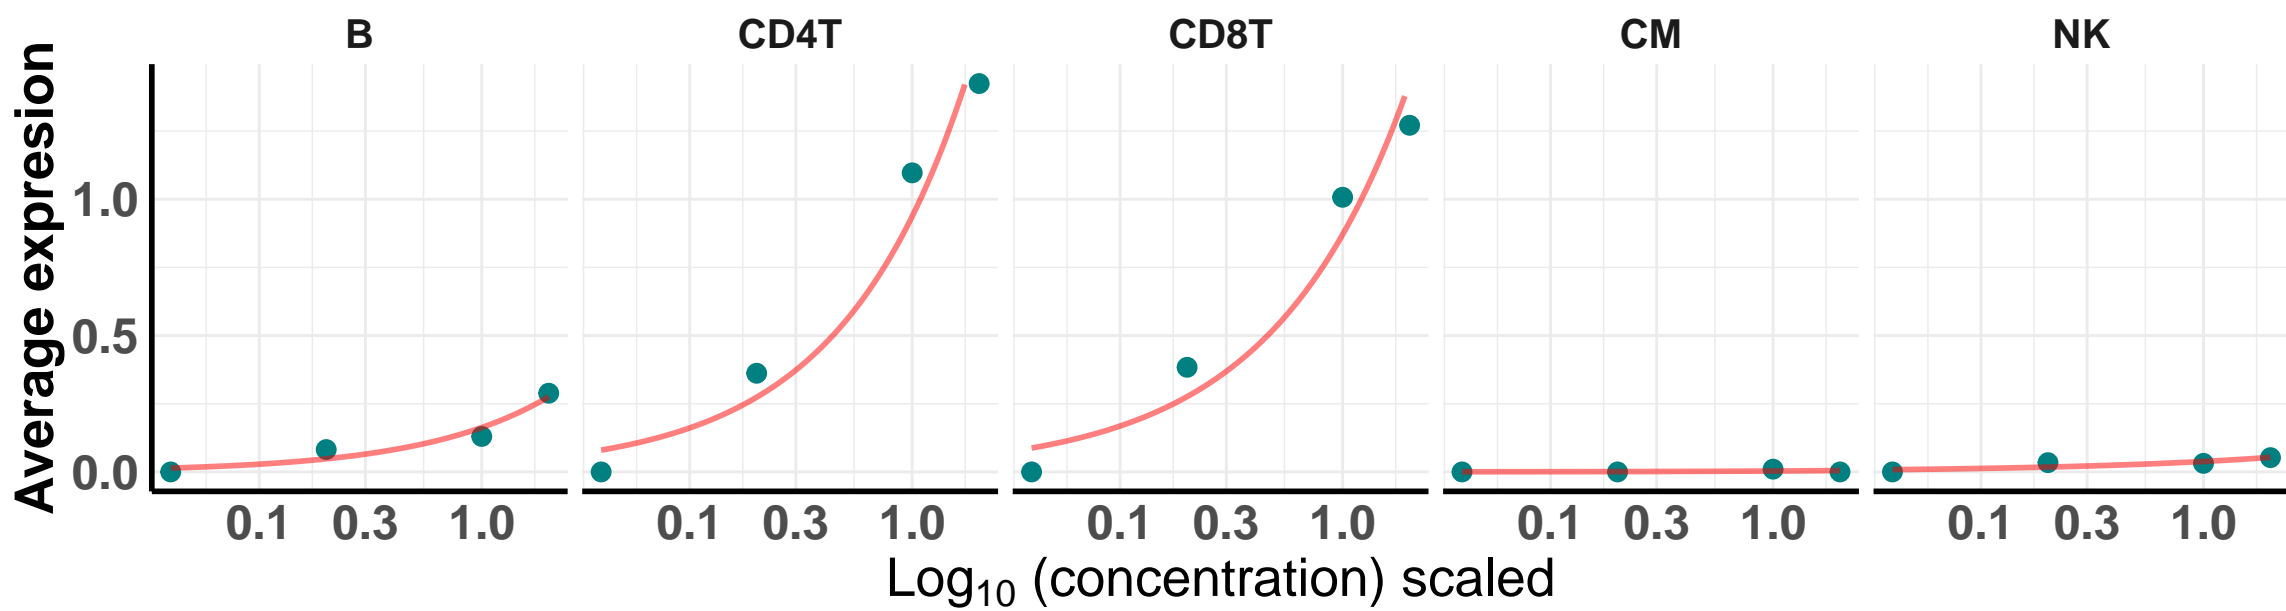

## CD272

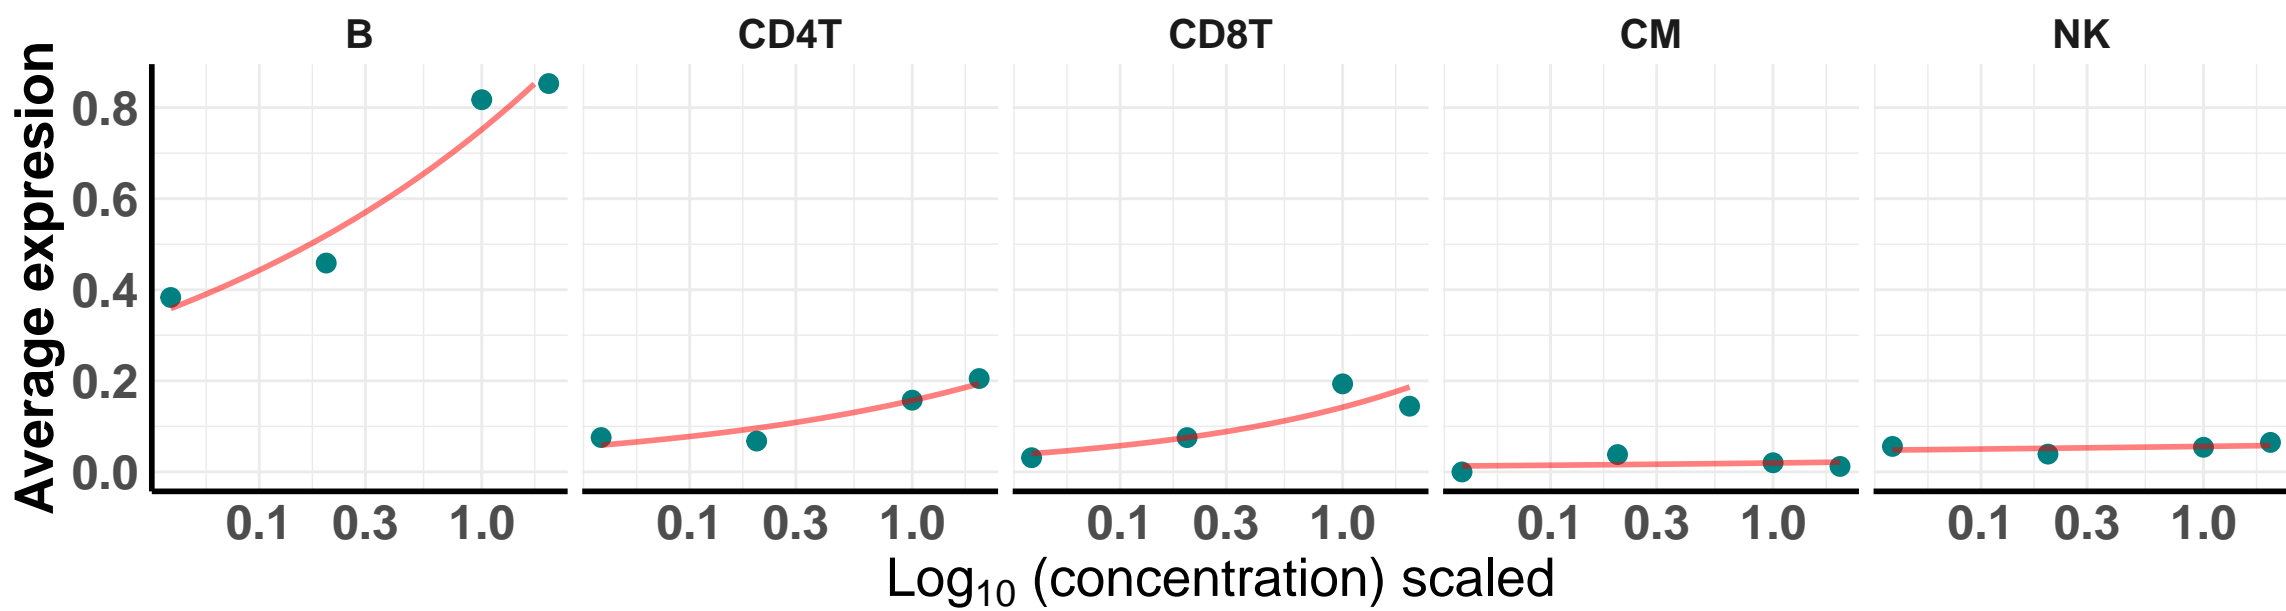

## CD278

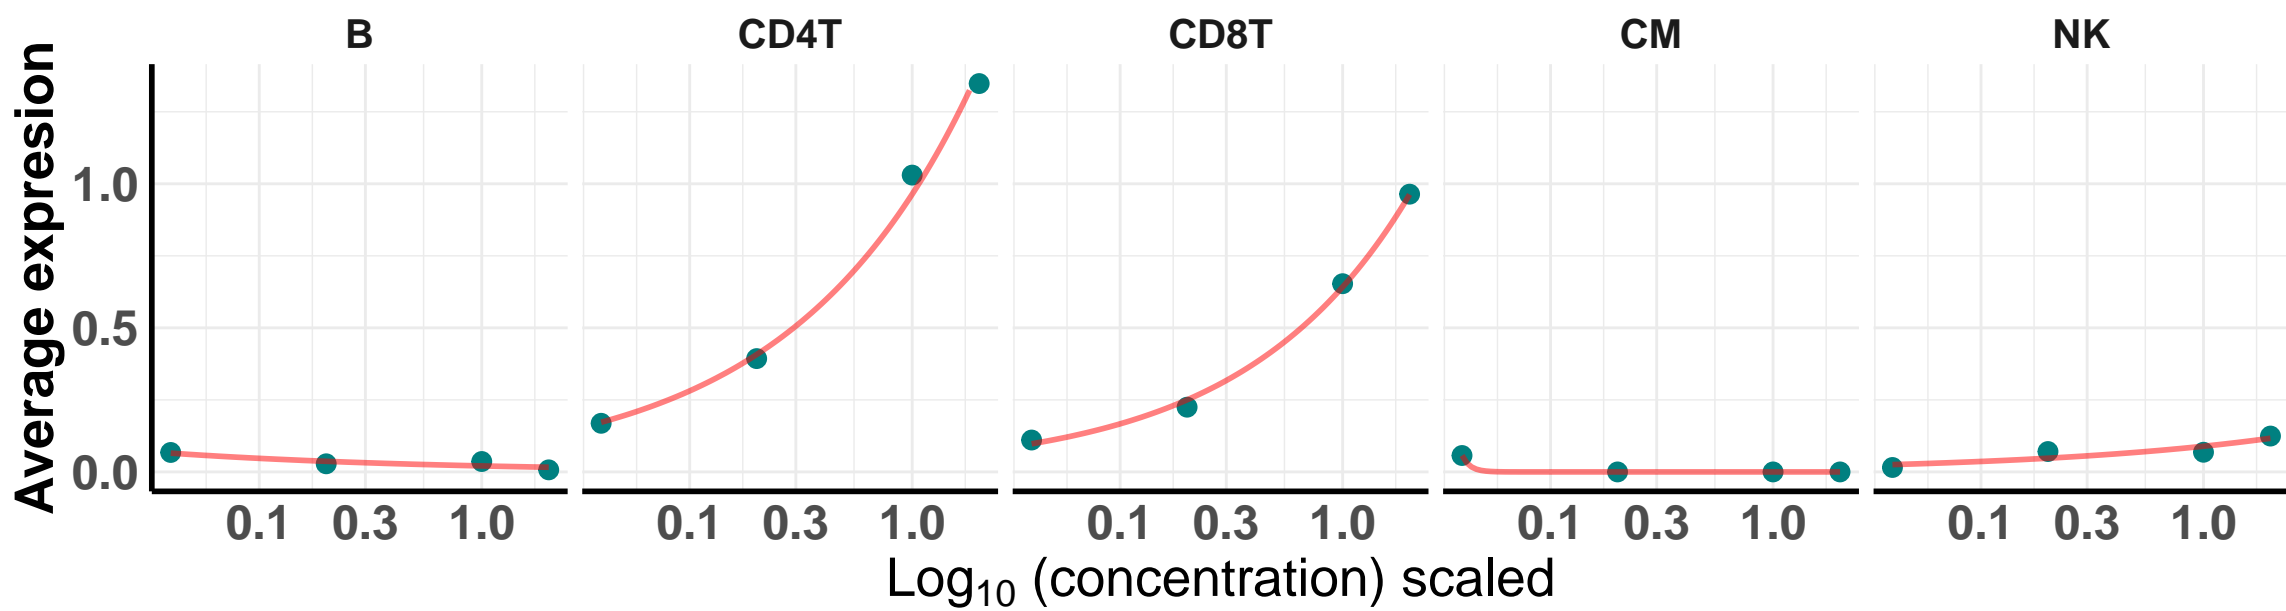

# CD28

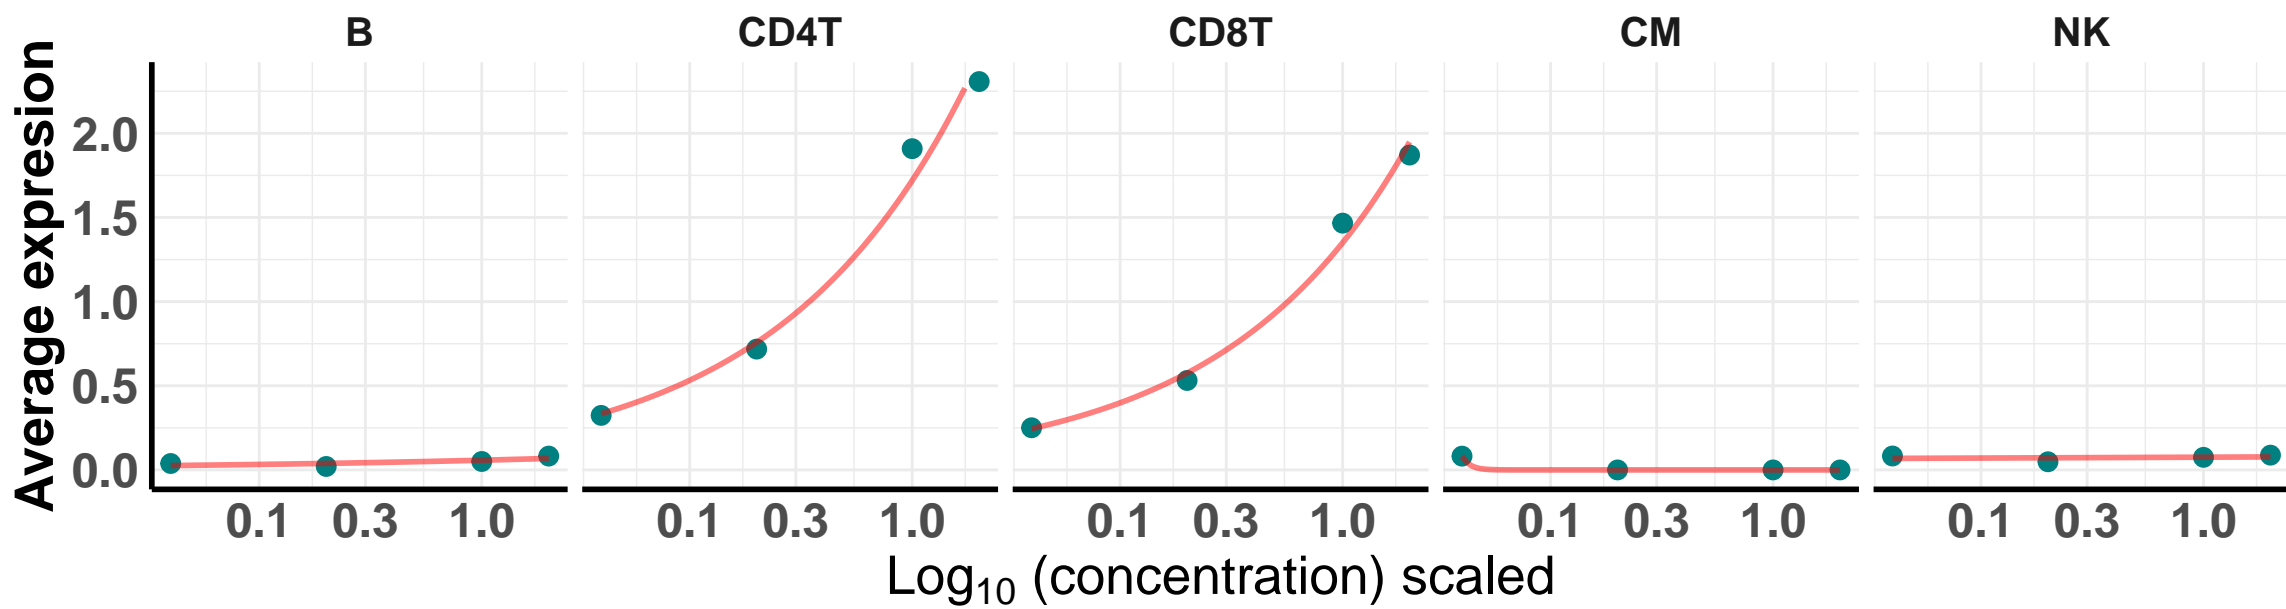

# CD29

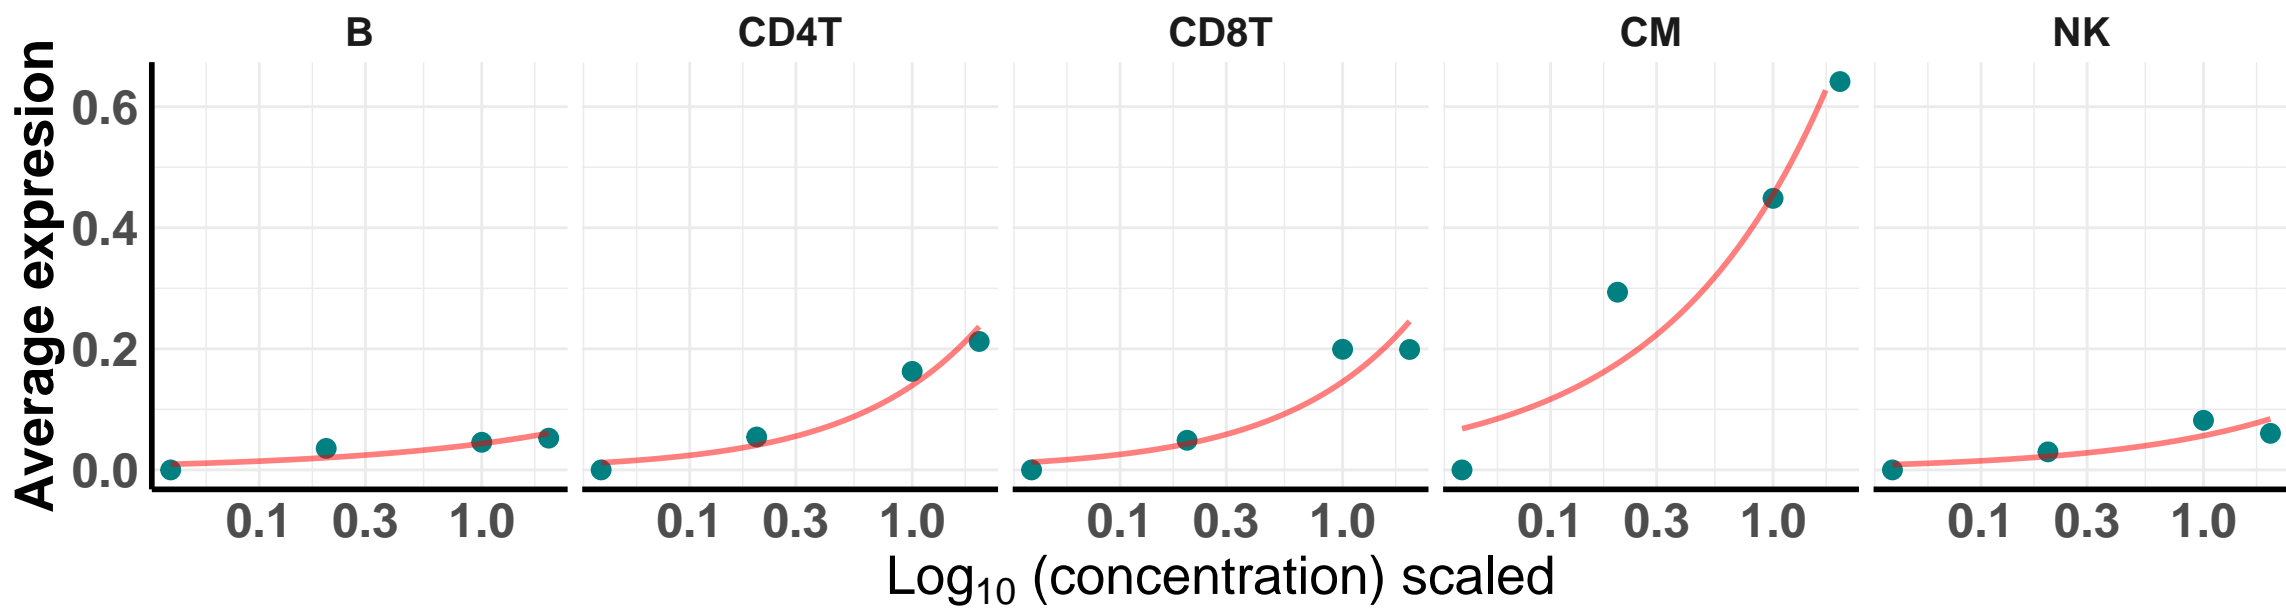

# CD3

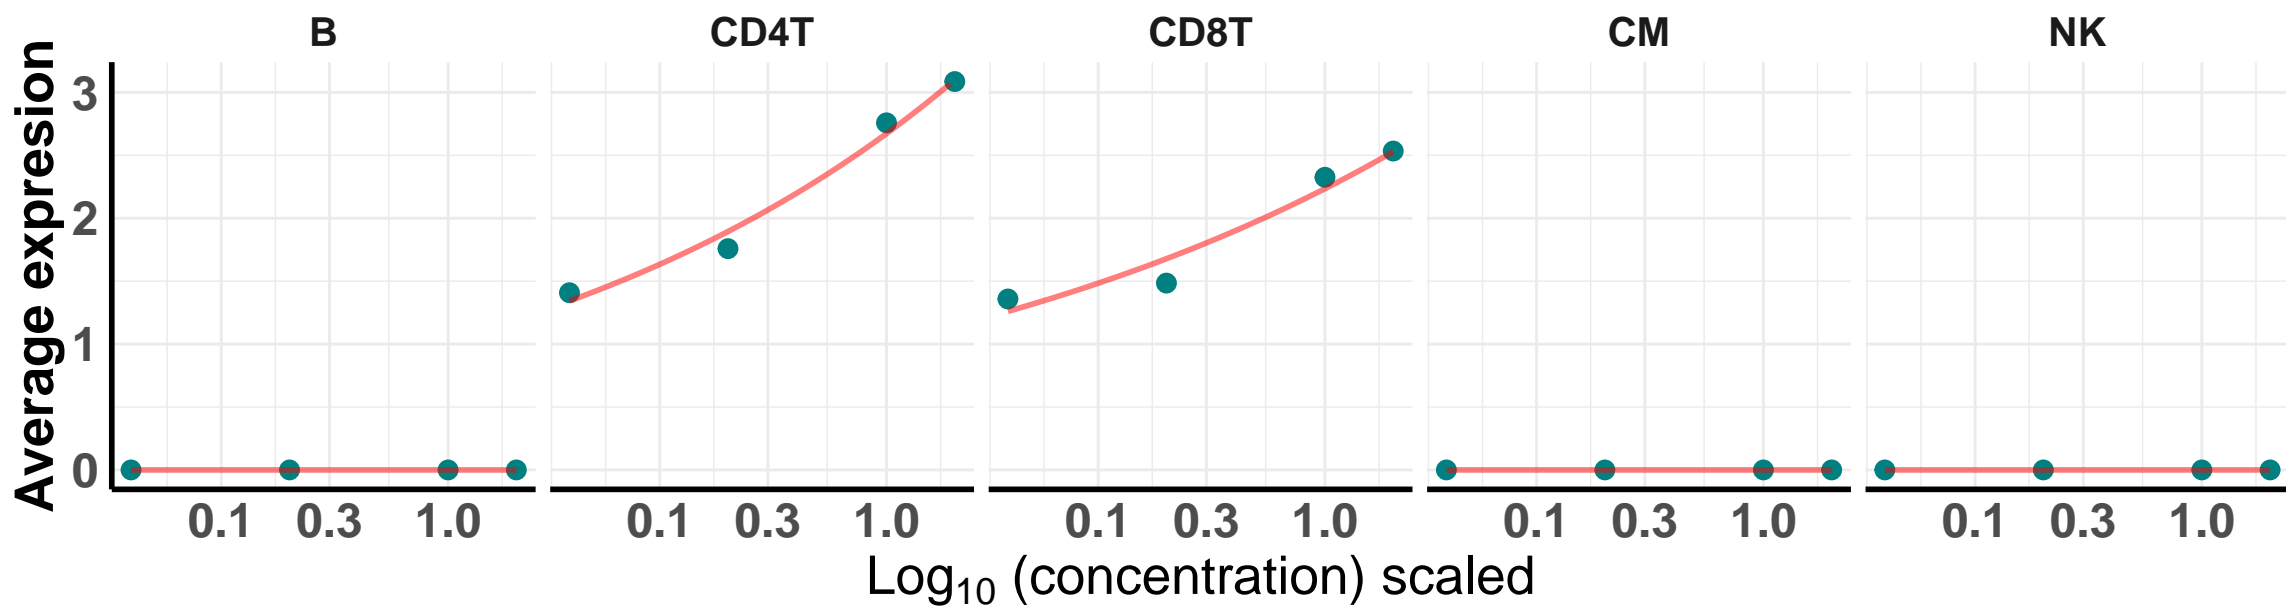

# CD30

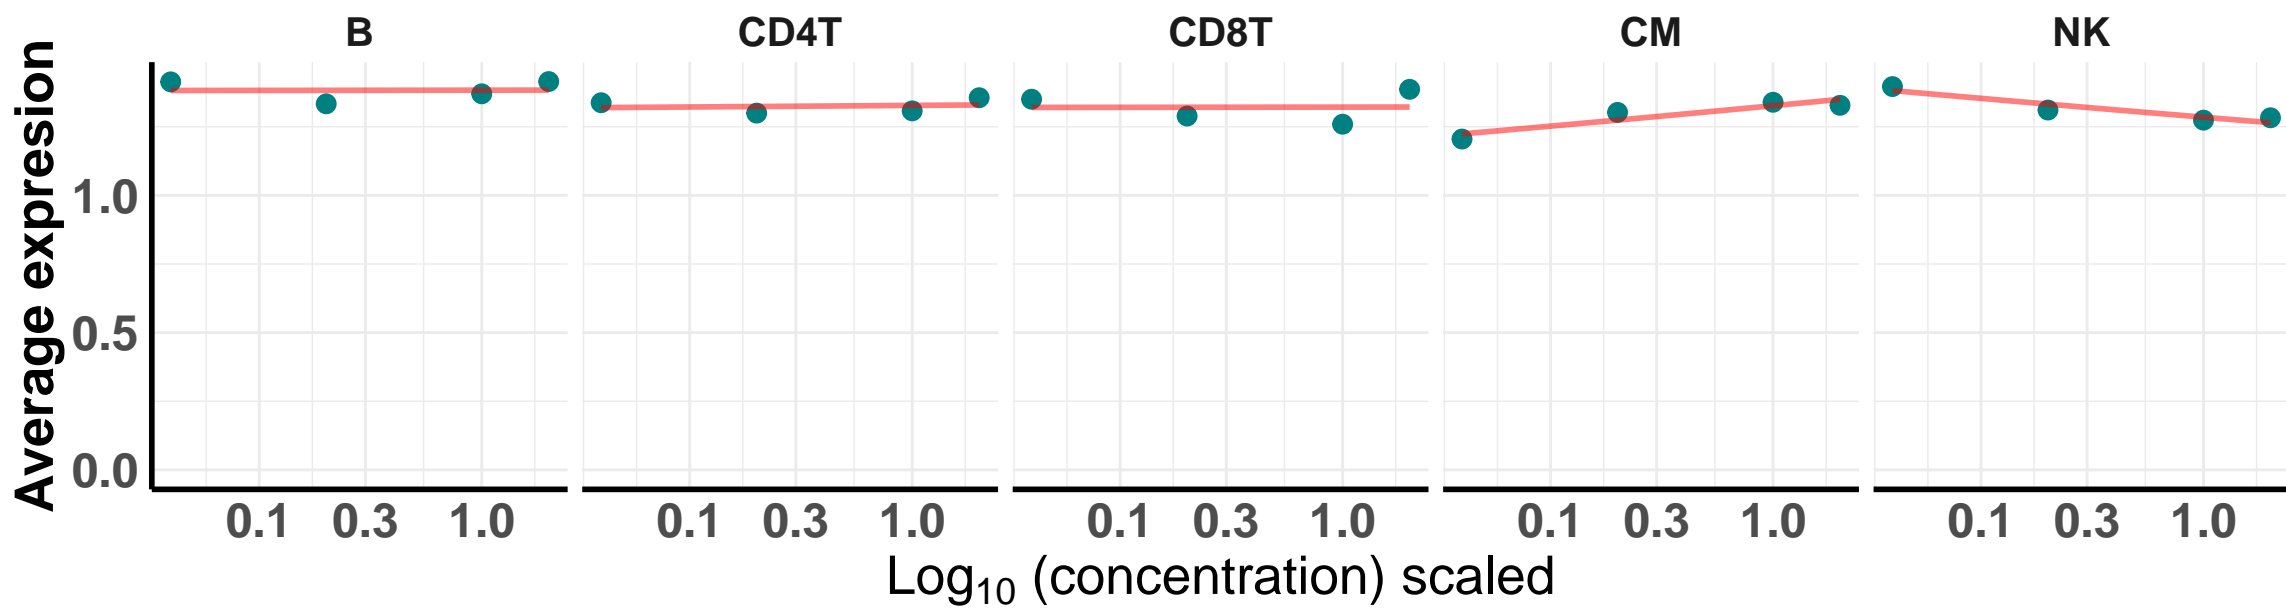

# CD328

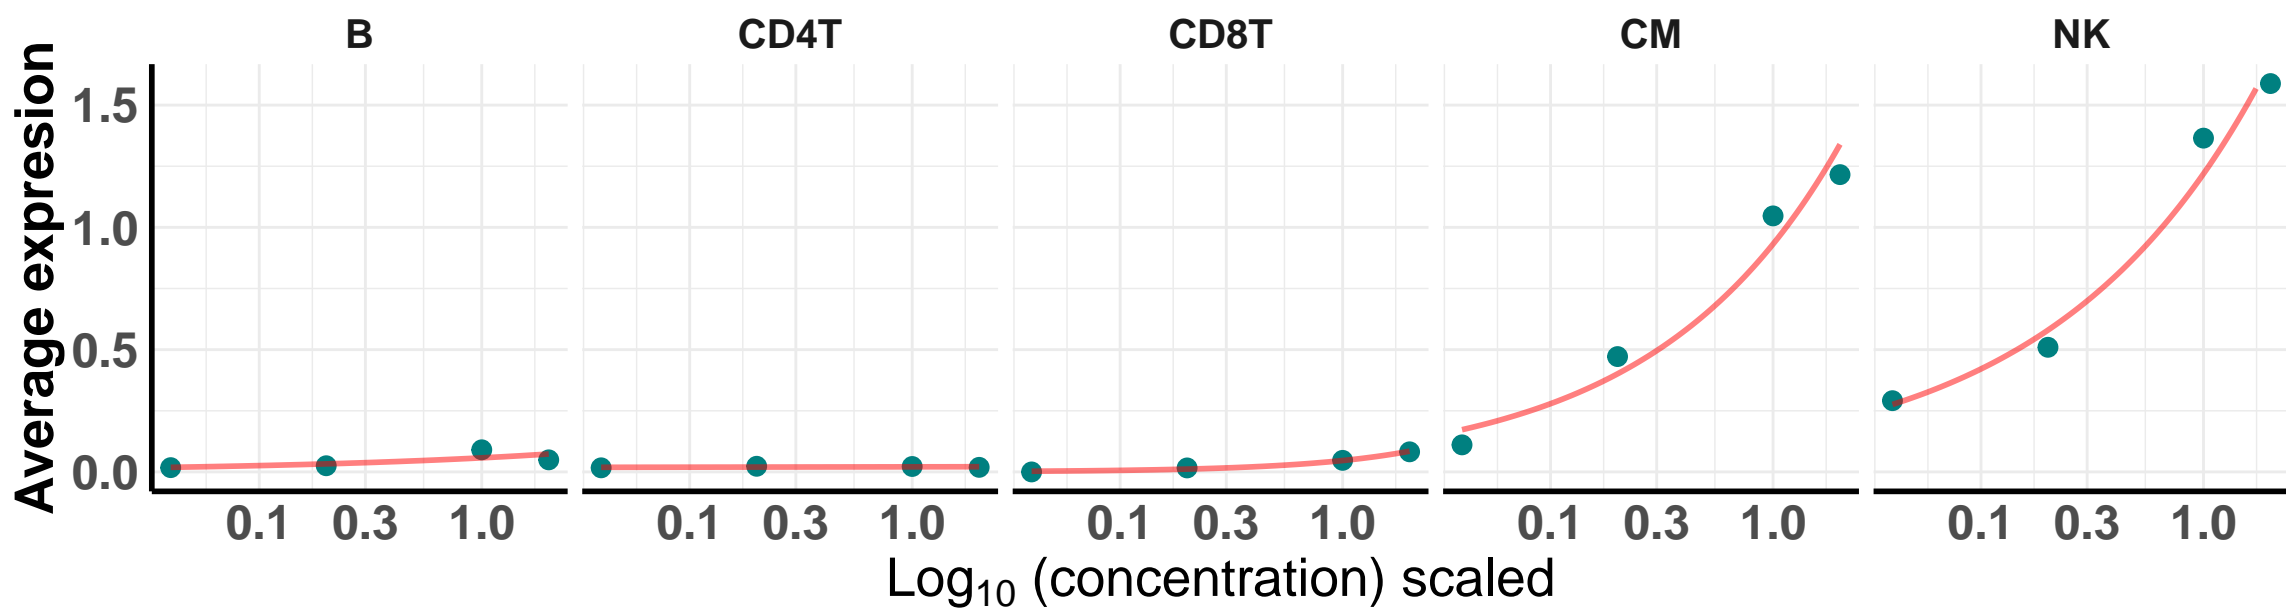

# CD33

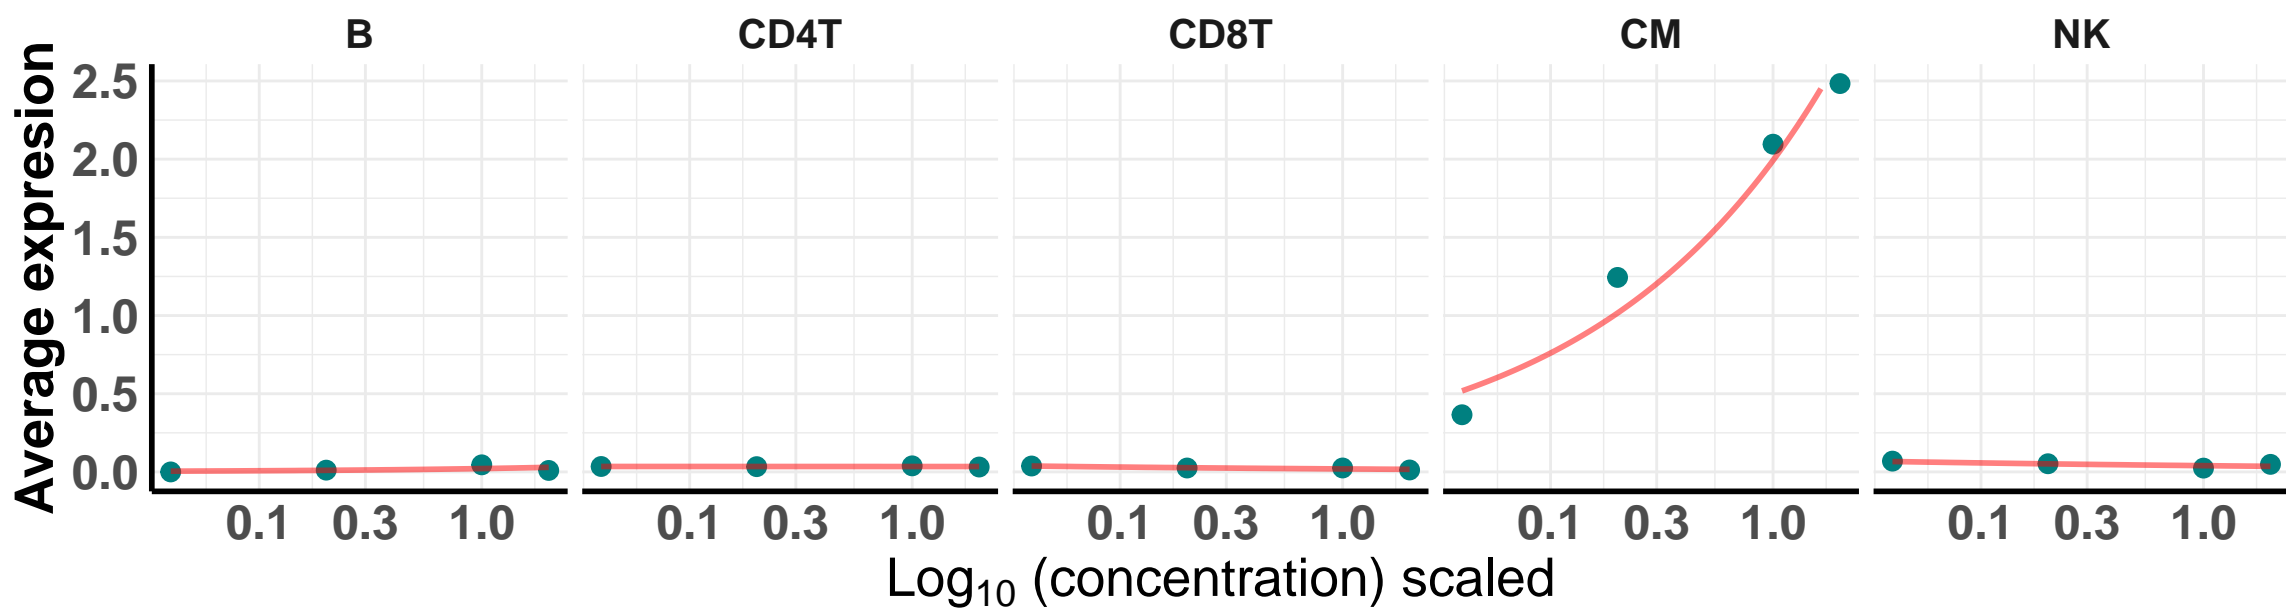

# CD335

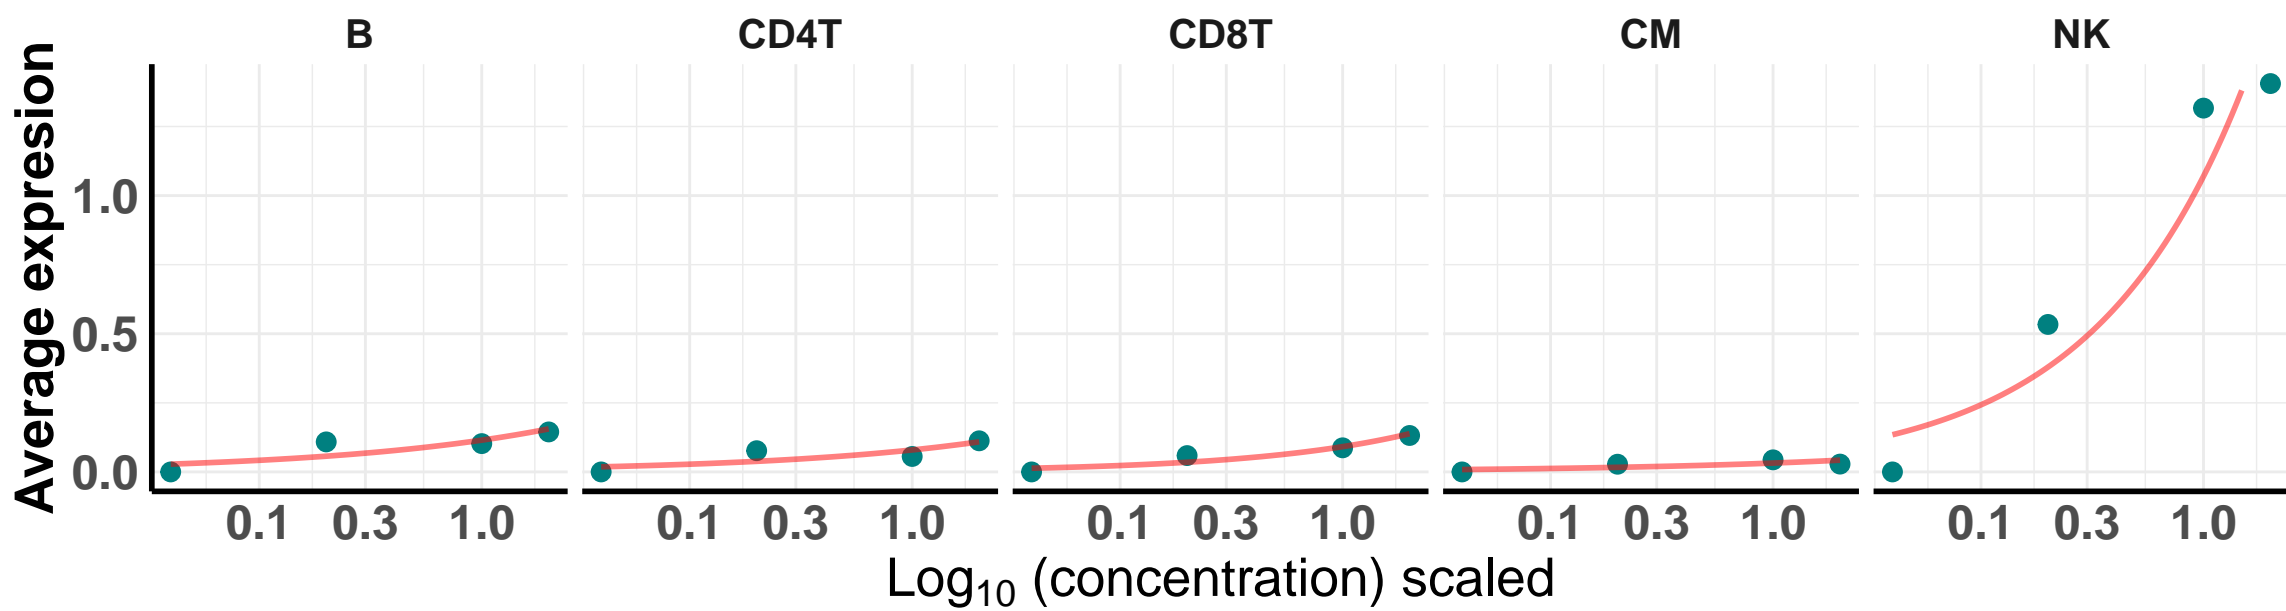

# CD337

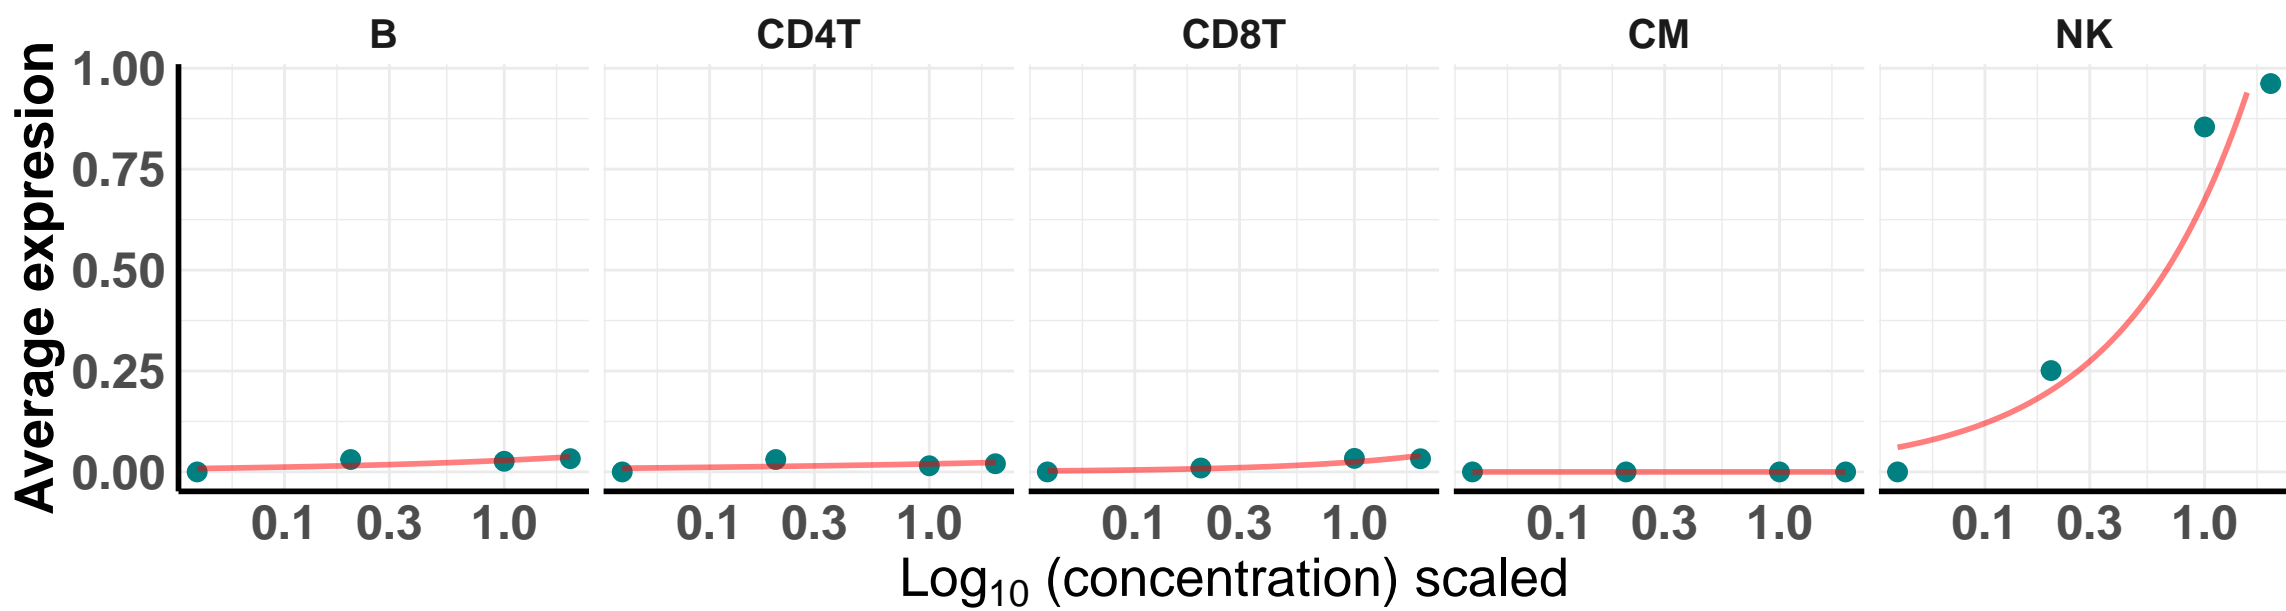

## CD360

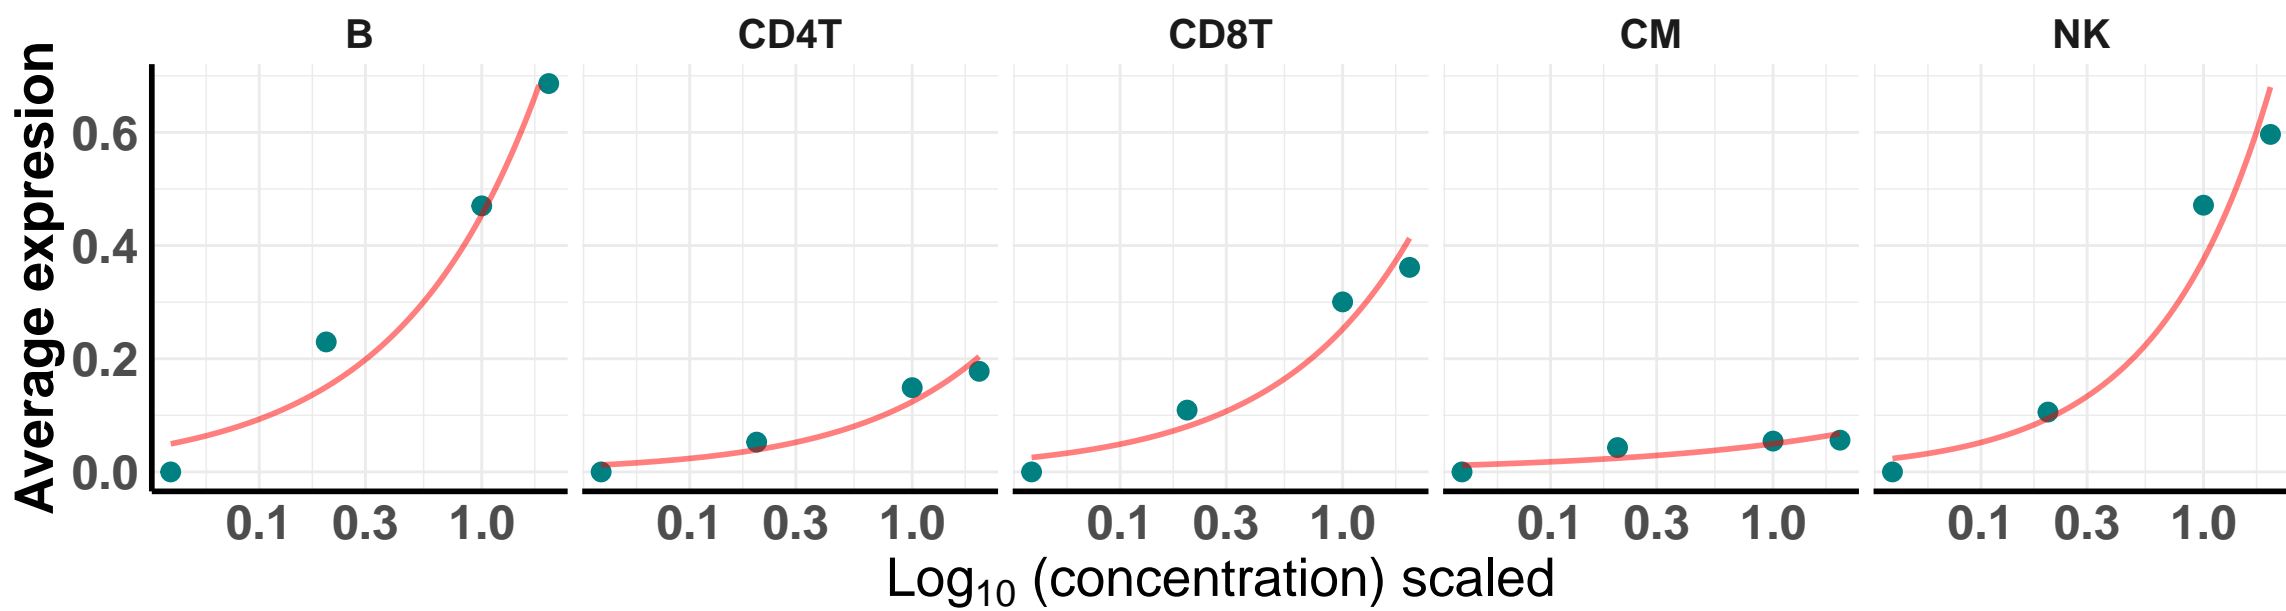

## CD366

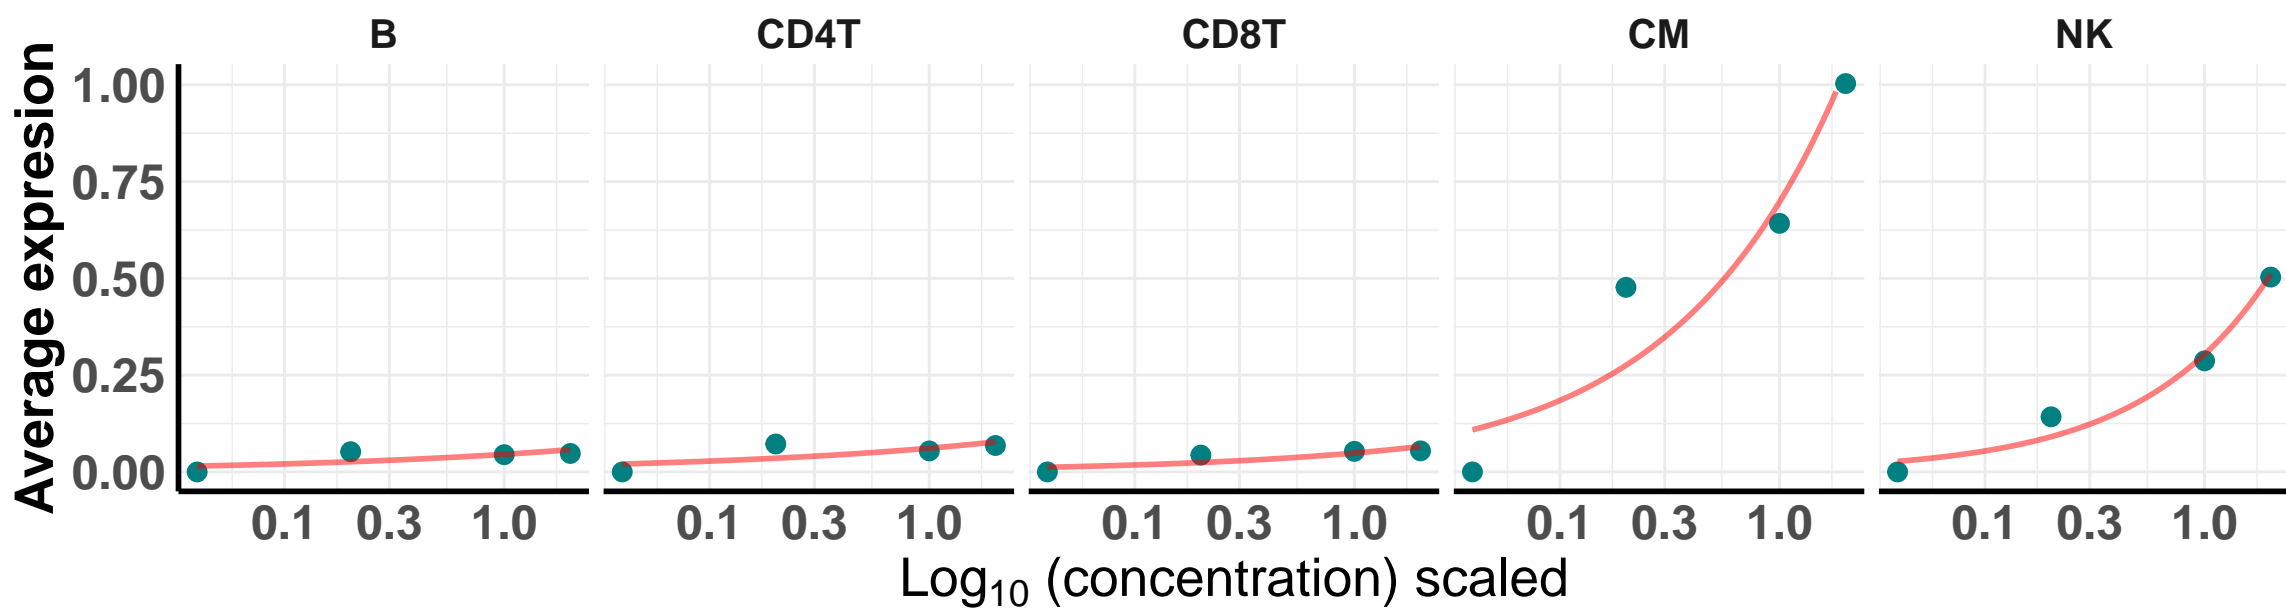

## CD38

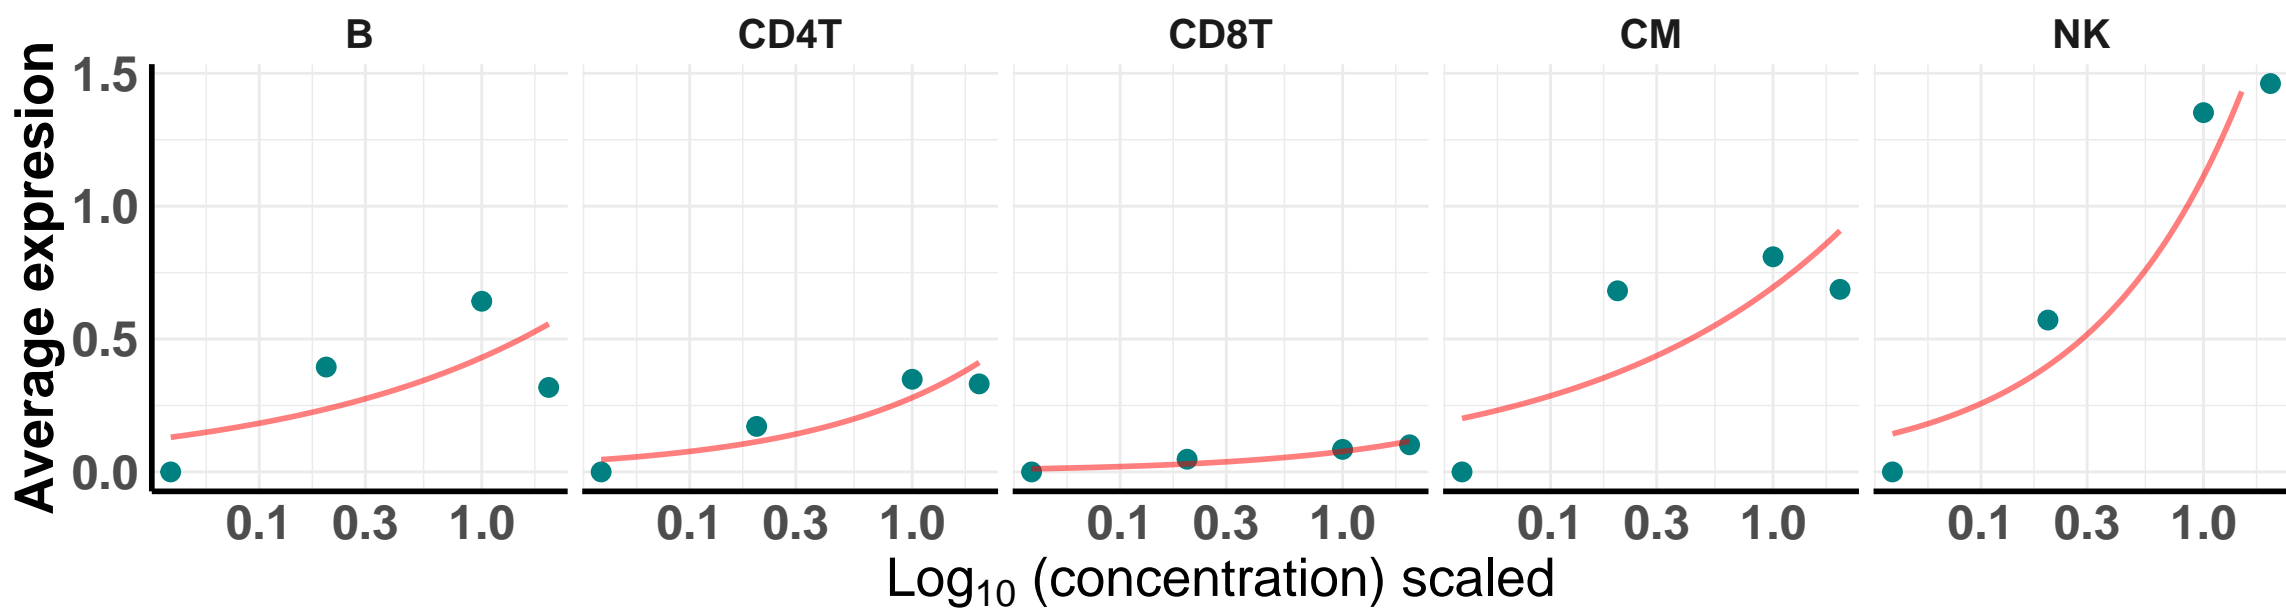

## CD39

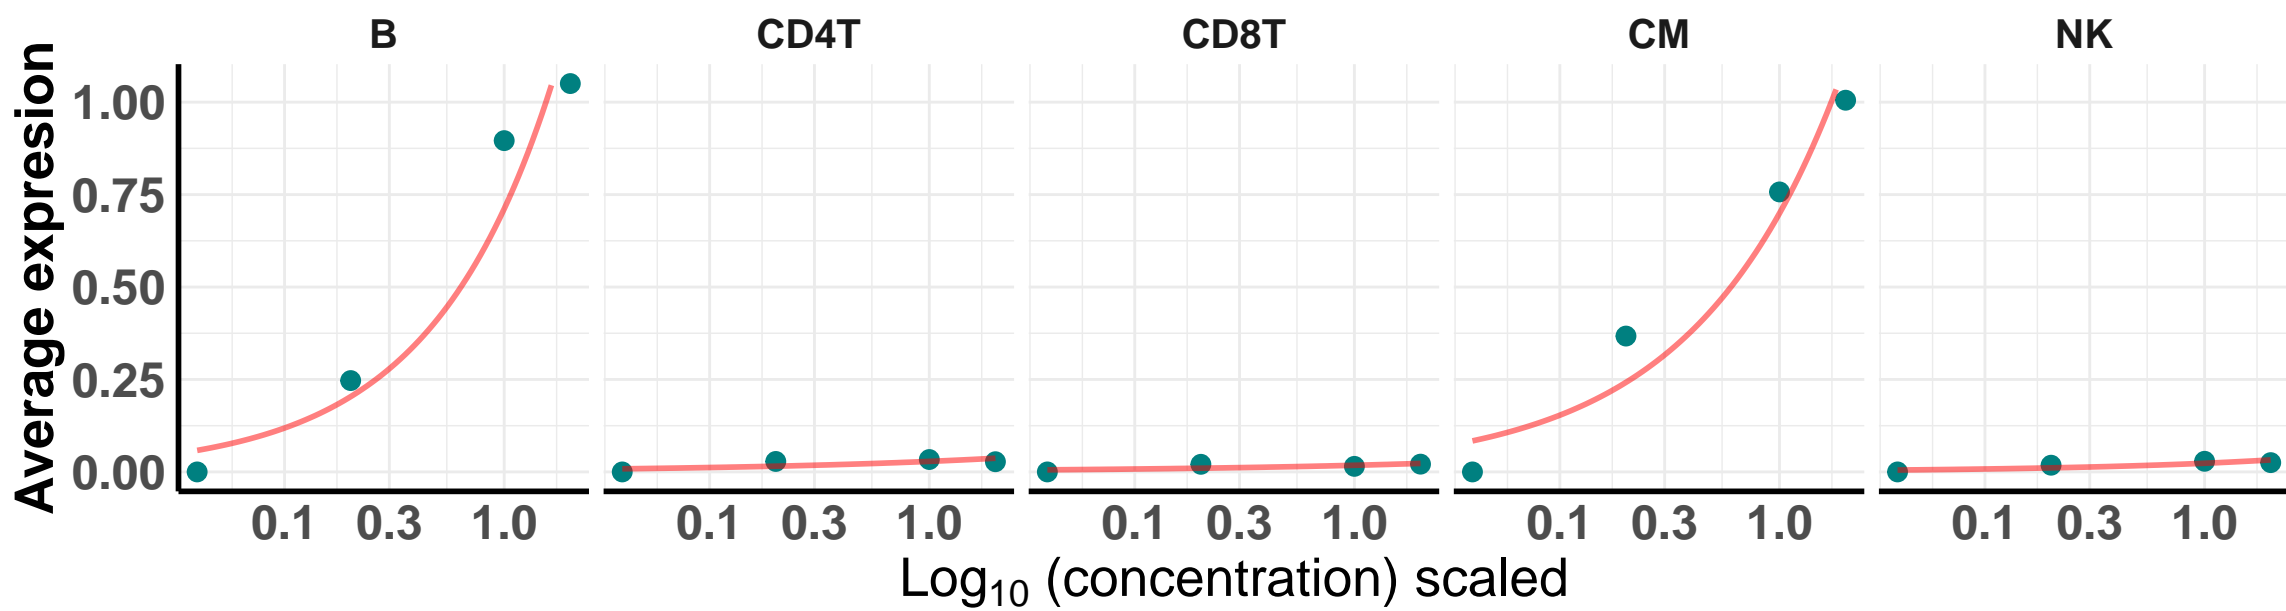

# CD41

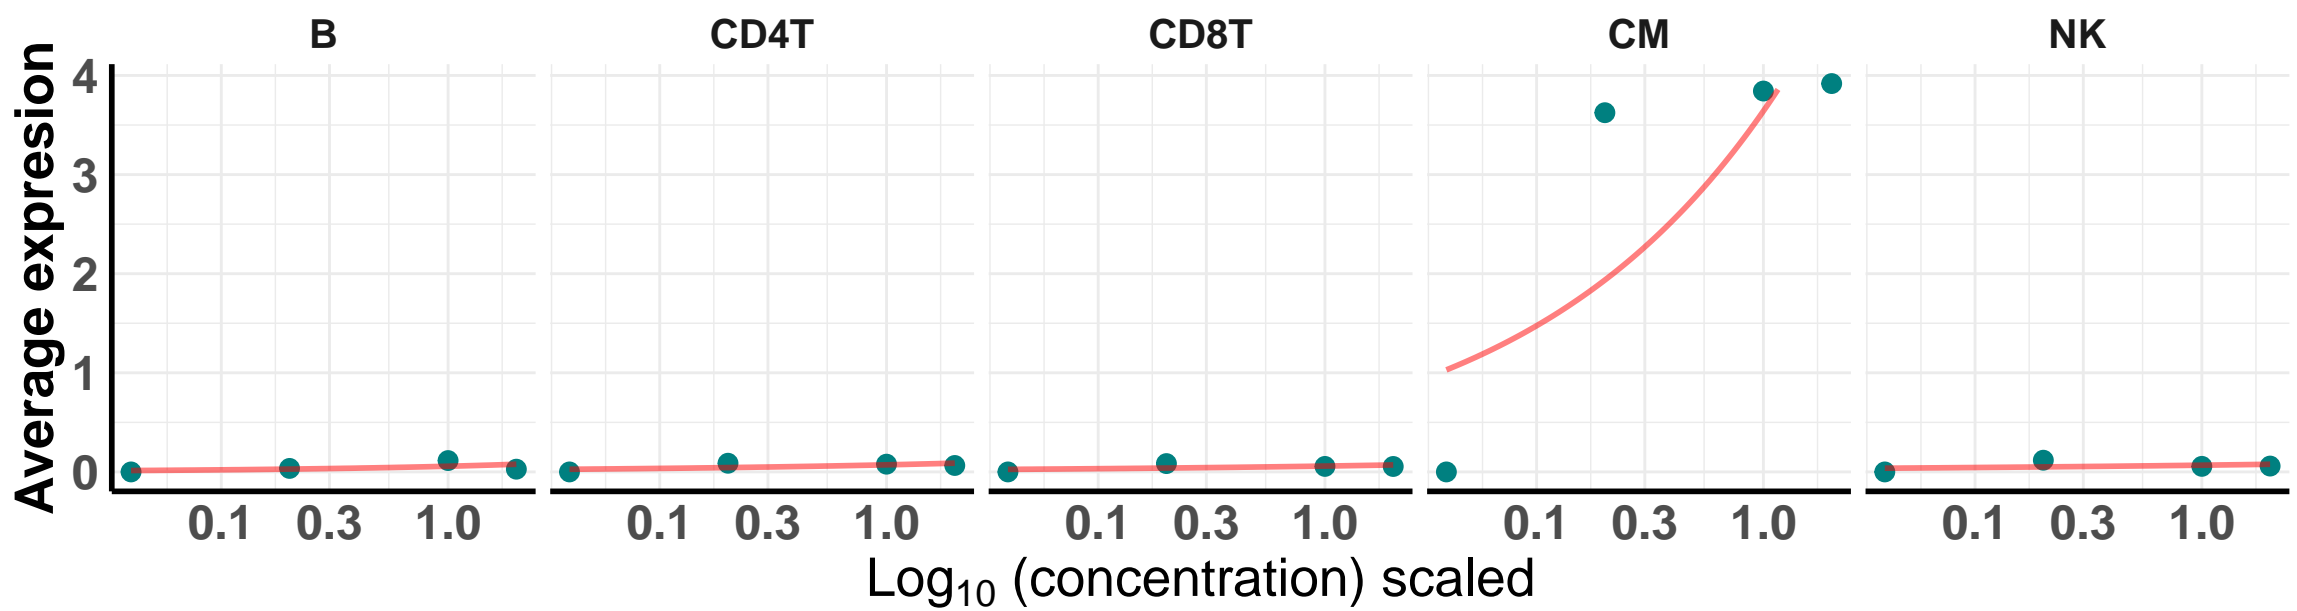

# CD44

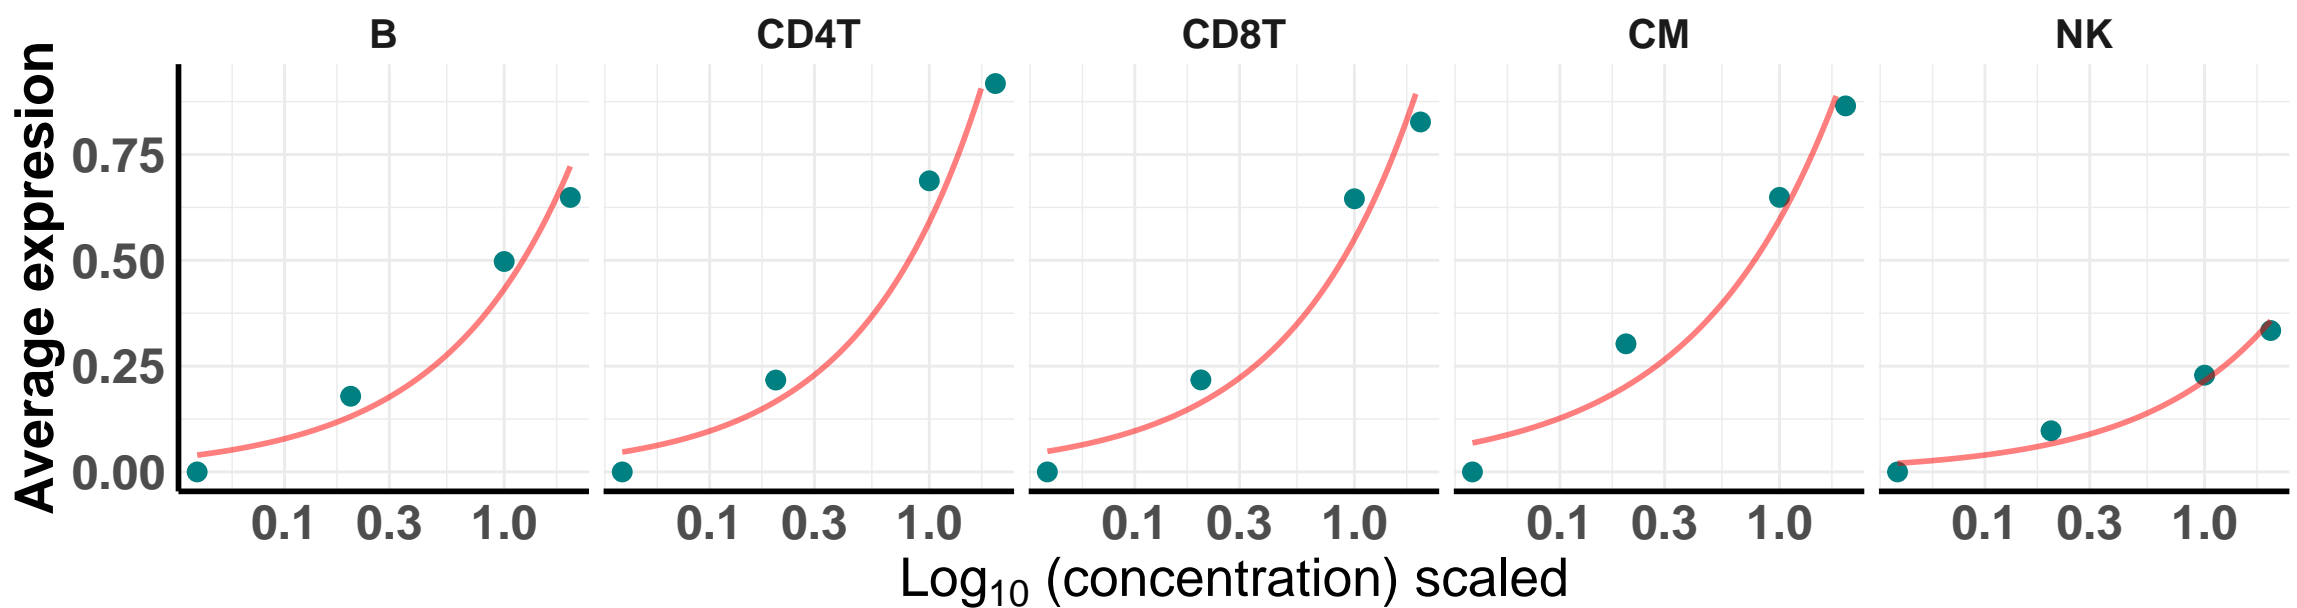

# CD45

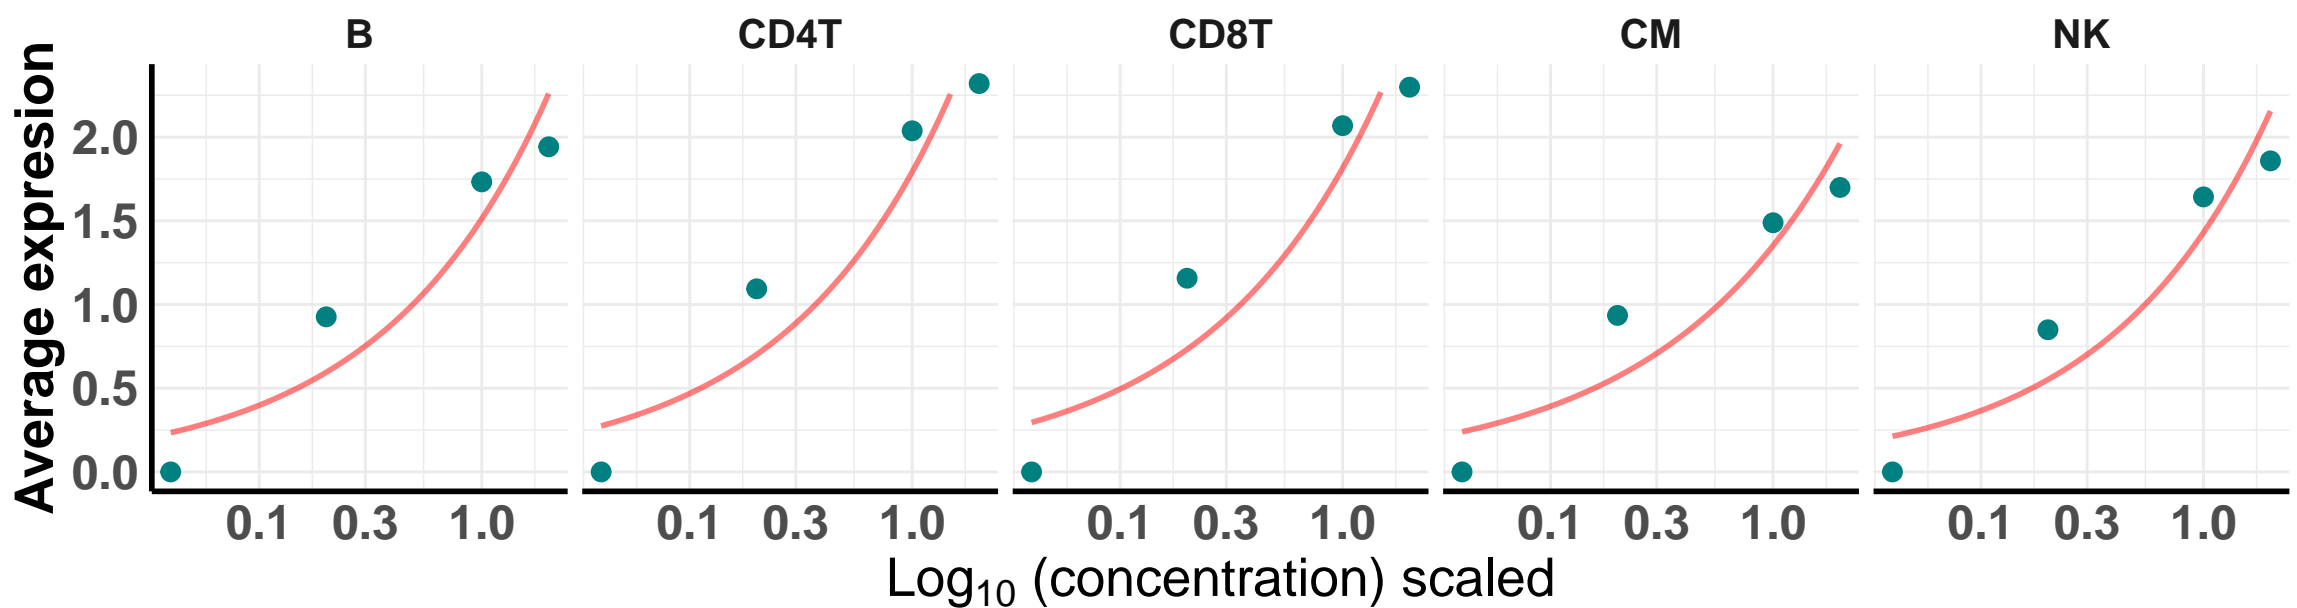

# CD45RA

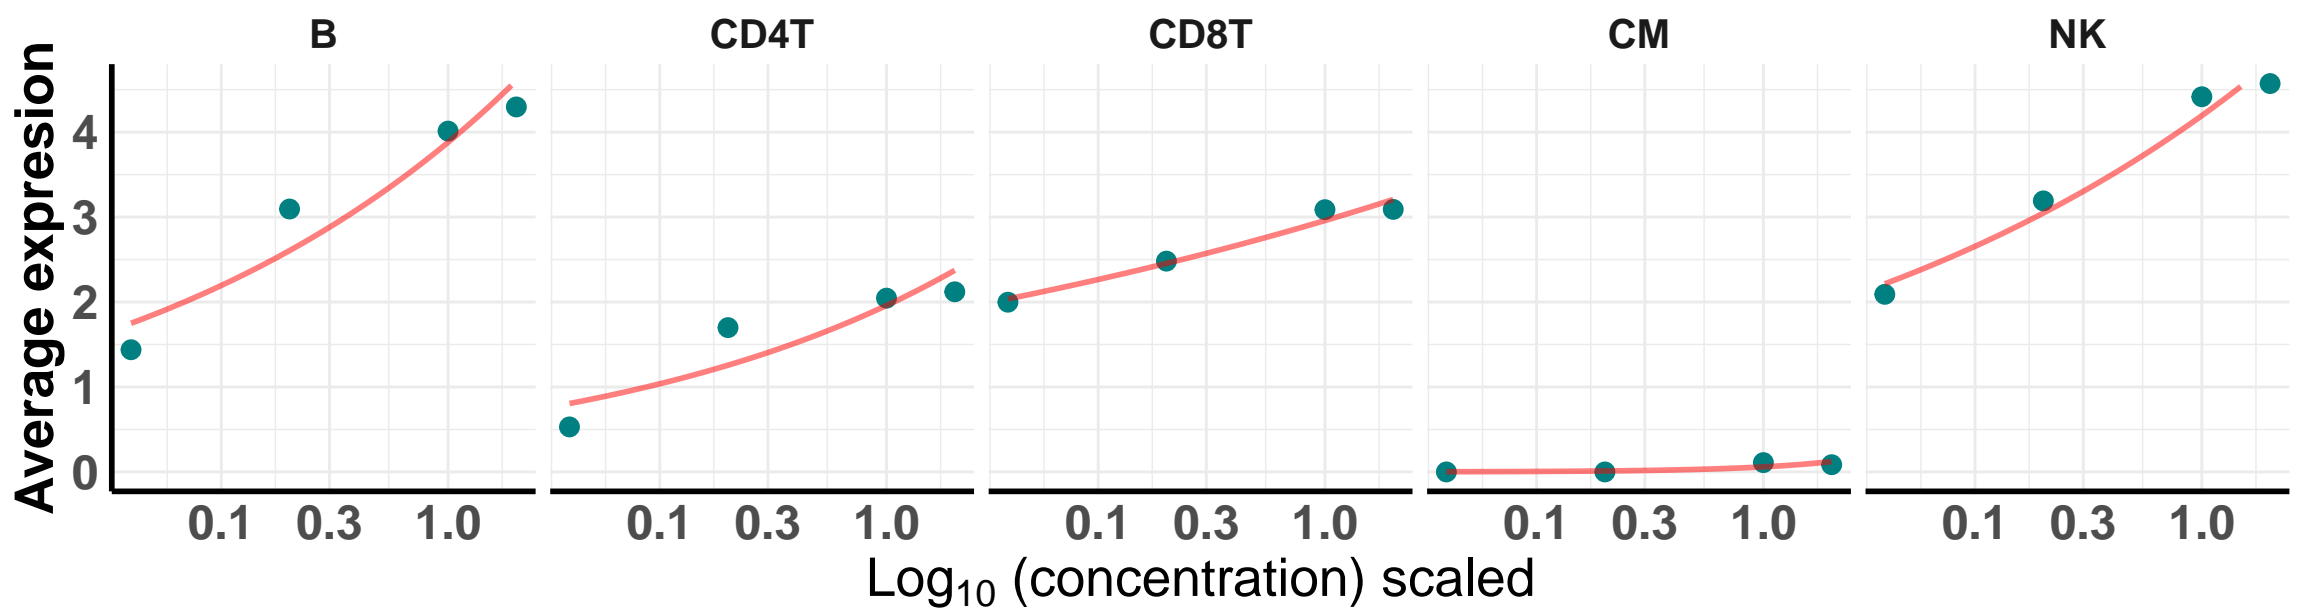

## CD49b

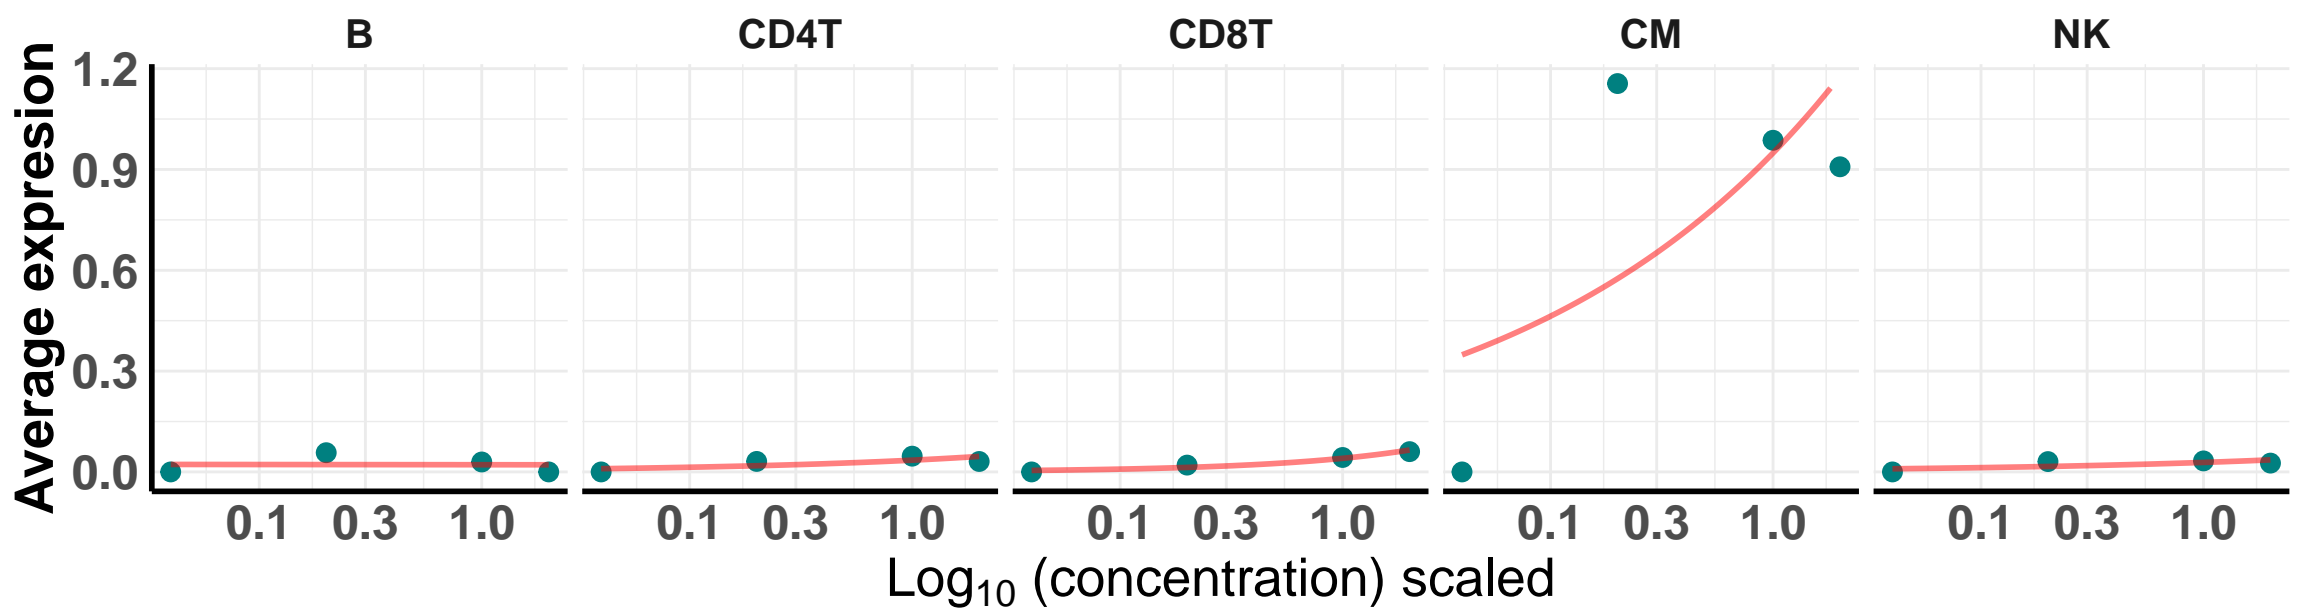

## CD49d

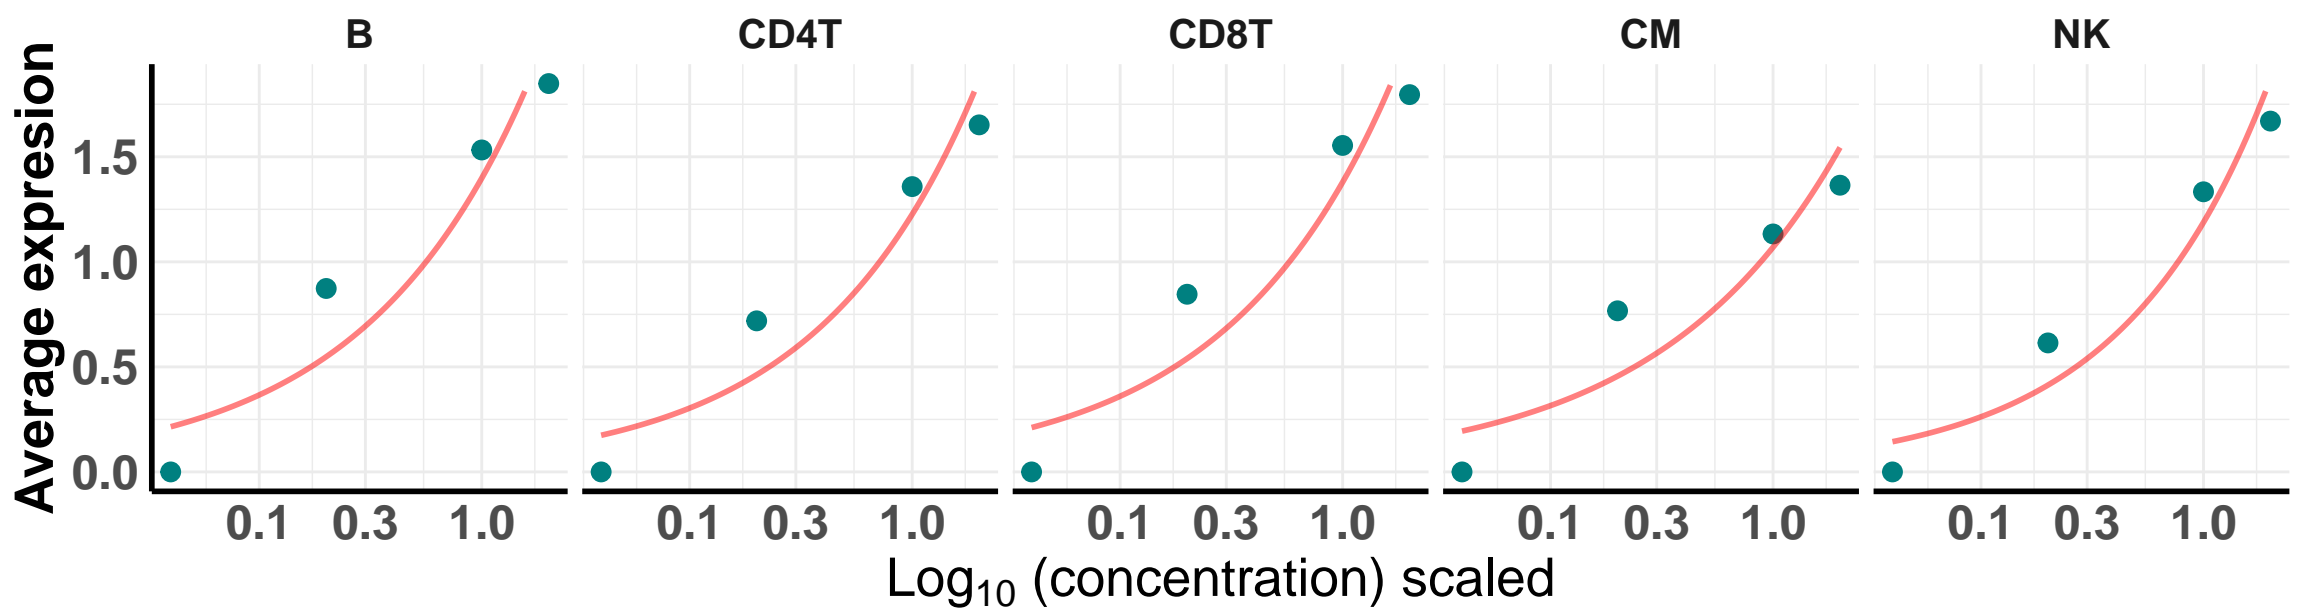

## CD49f

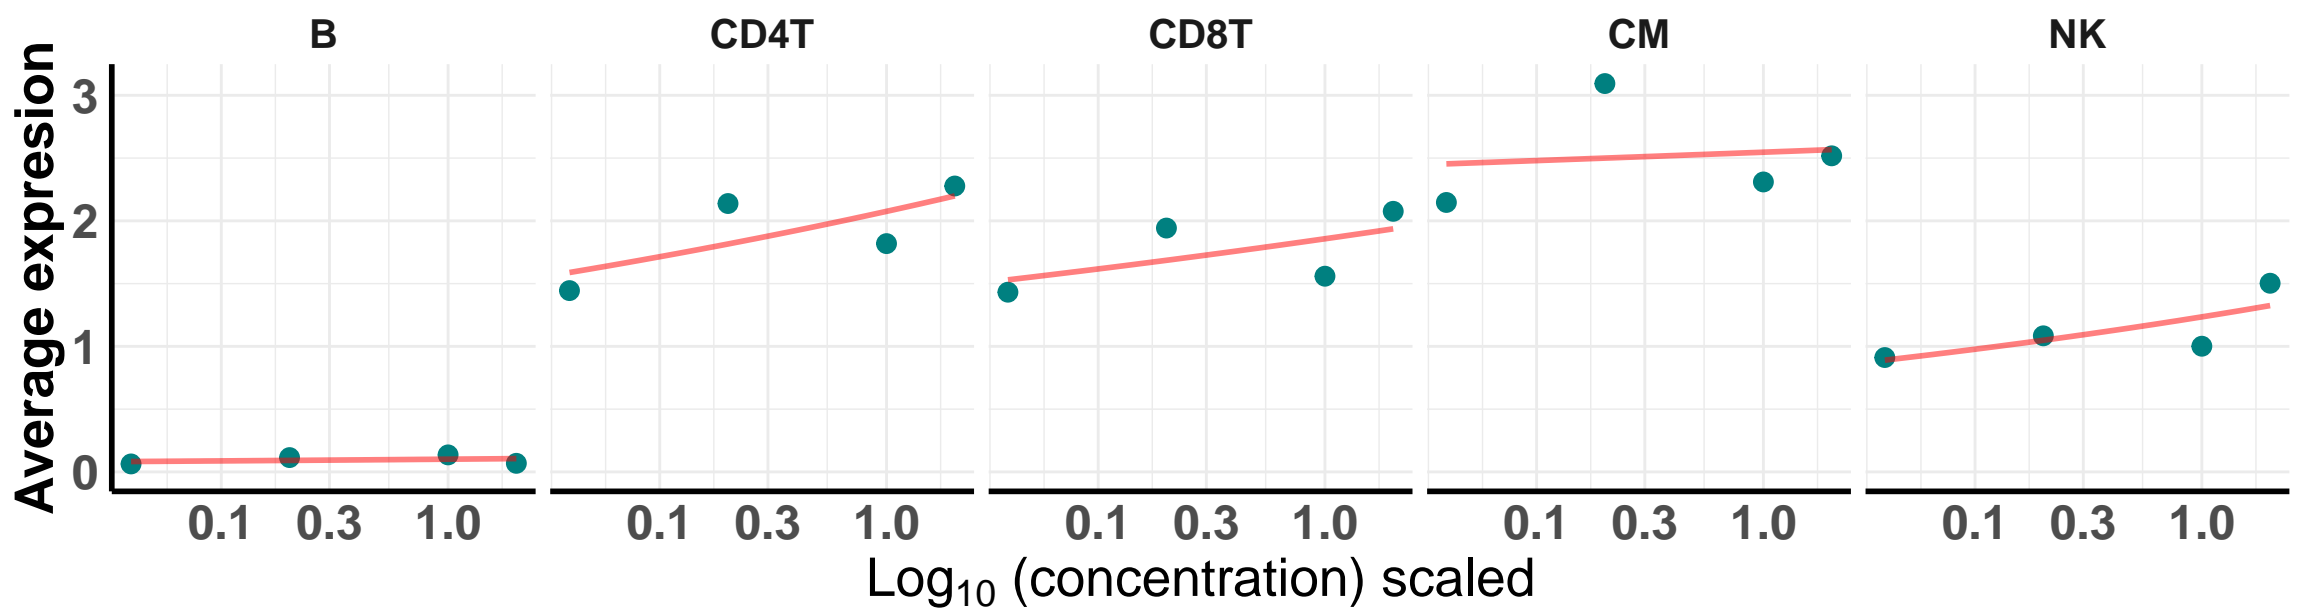

## CD5

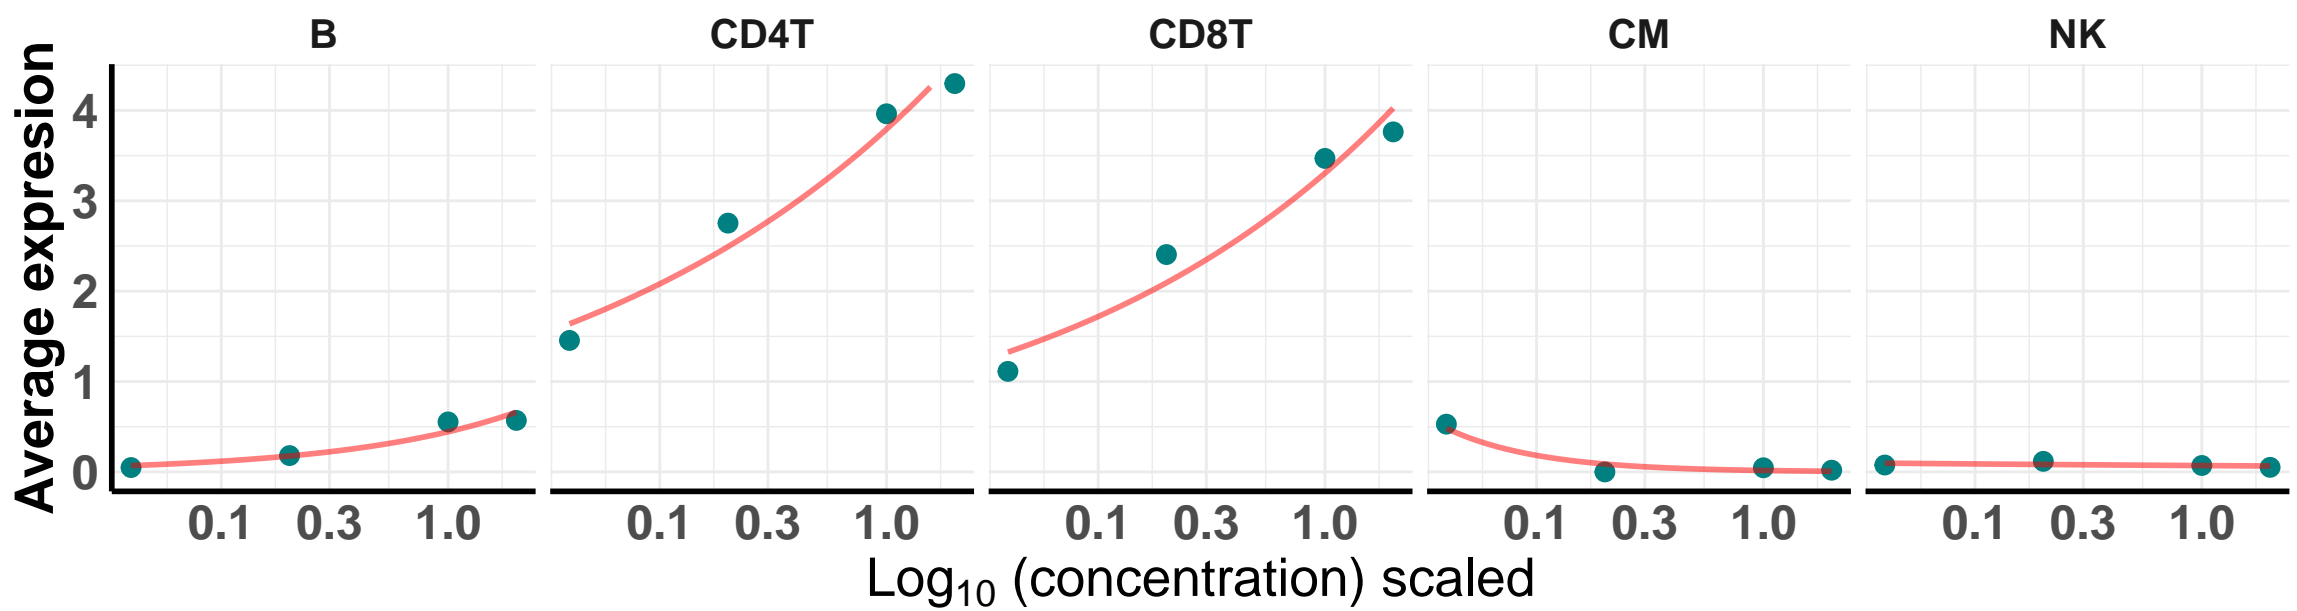

# CD56

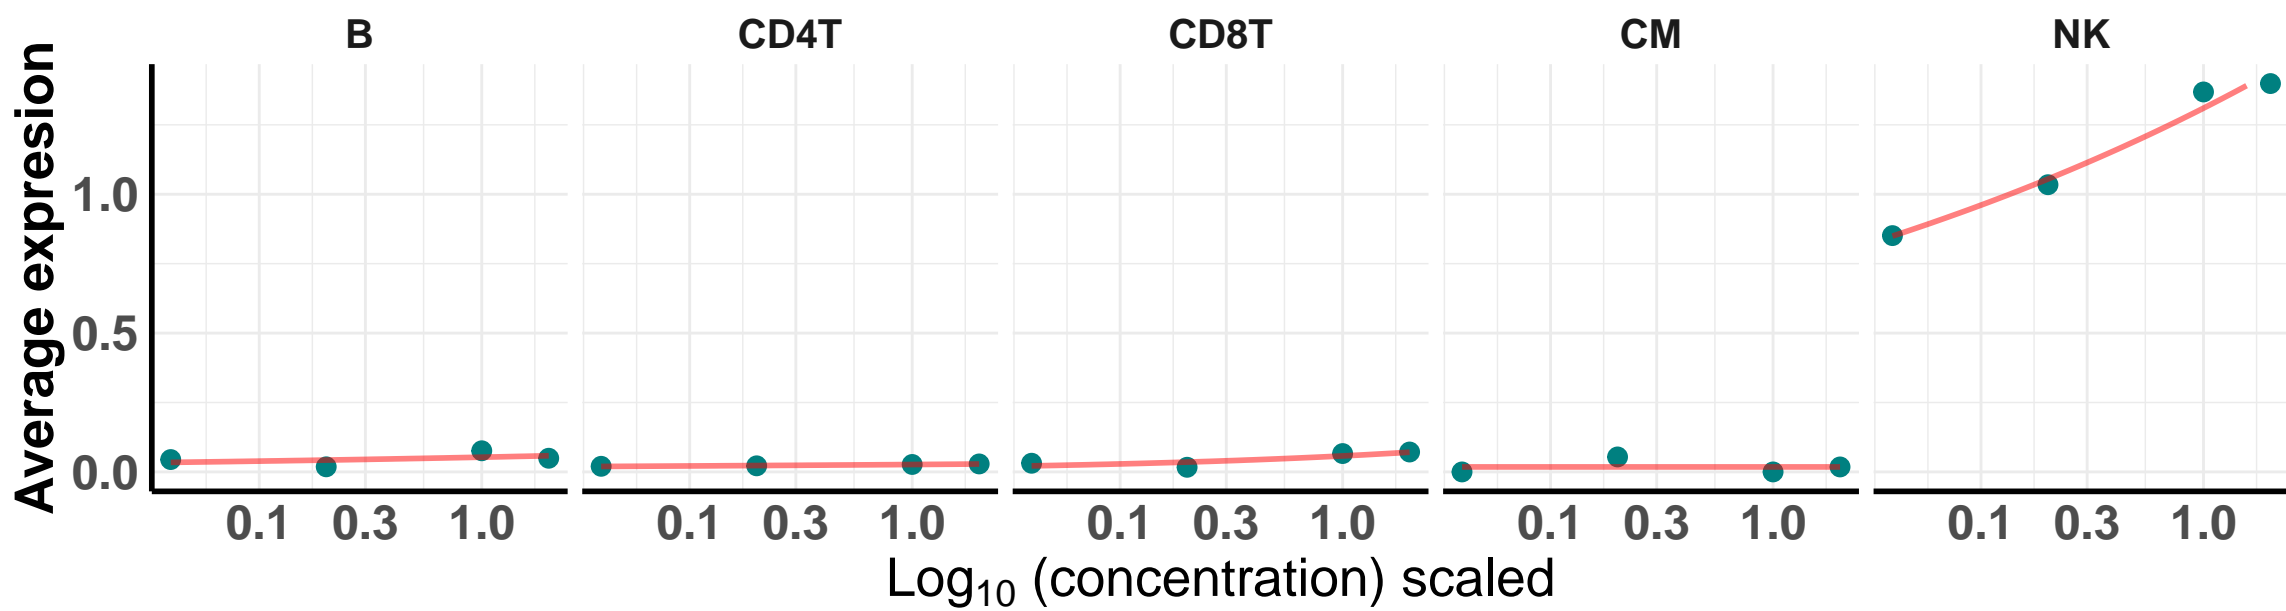

# CD57

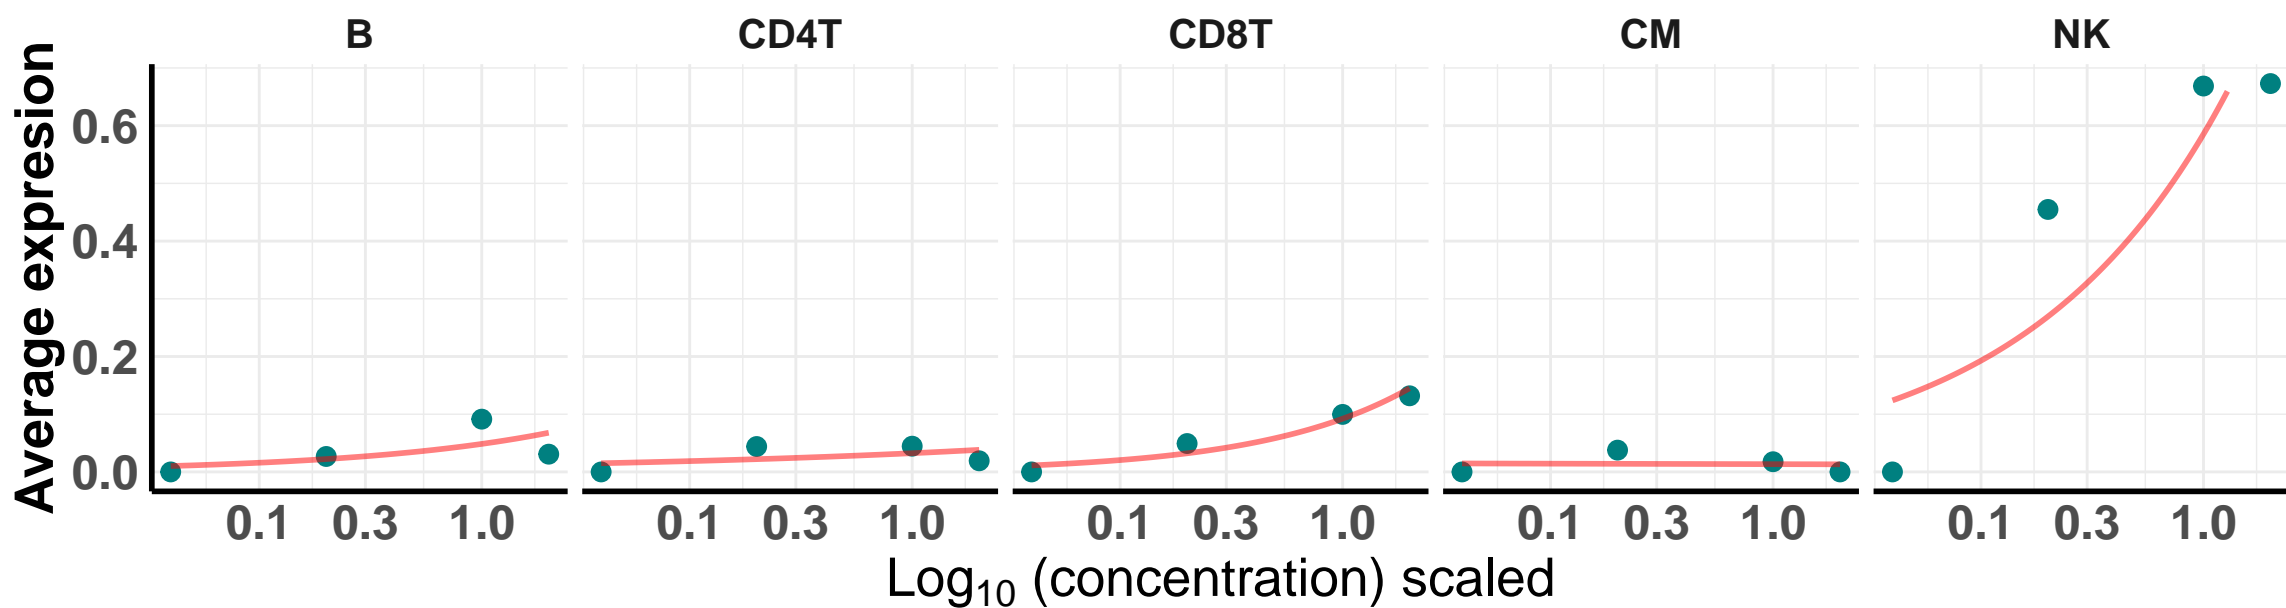

# CD58

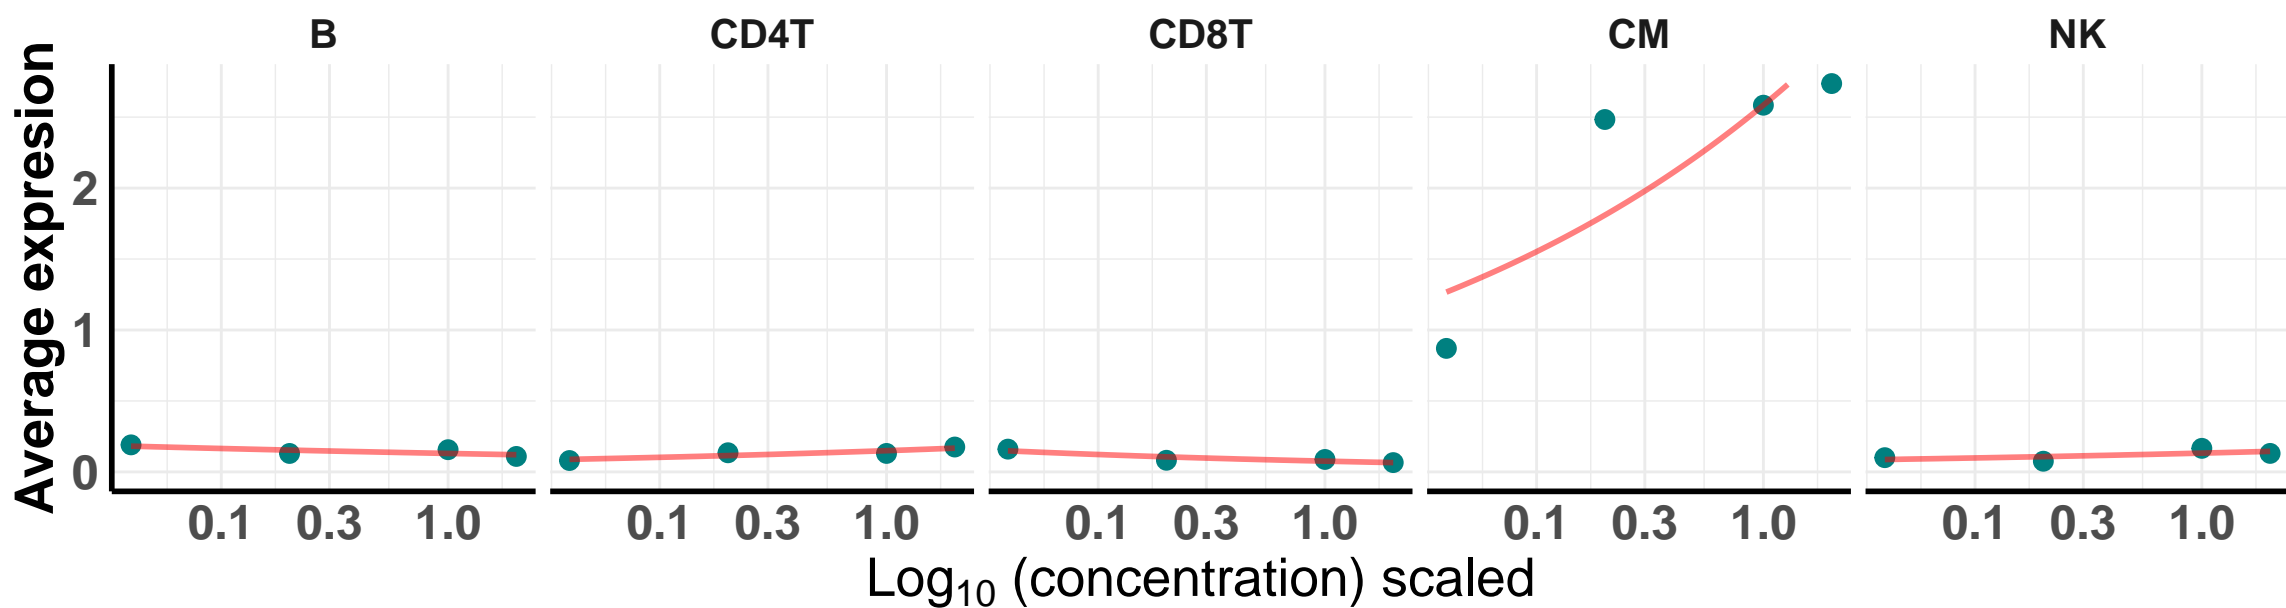

# CD62L

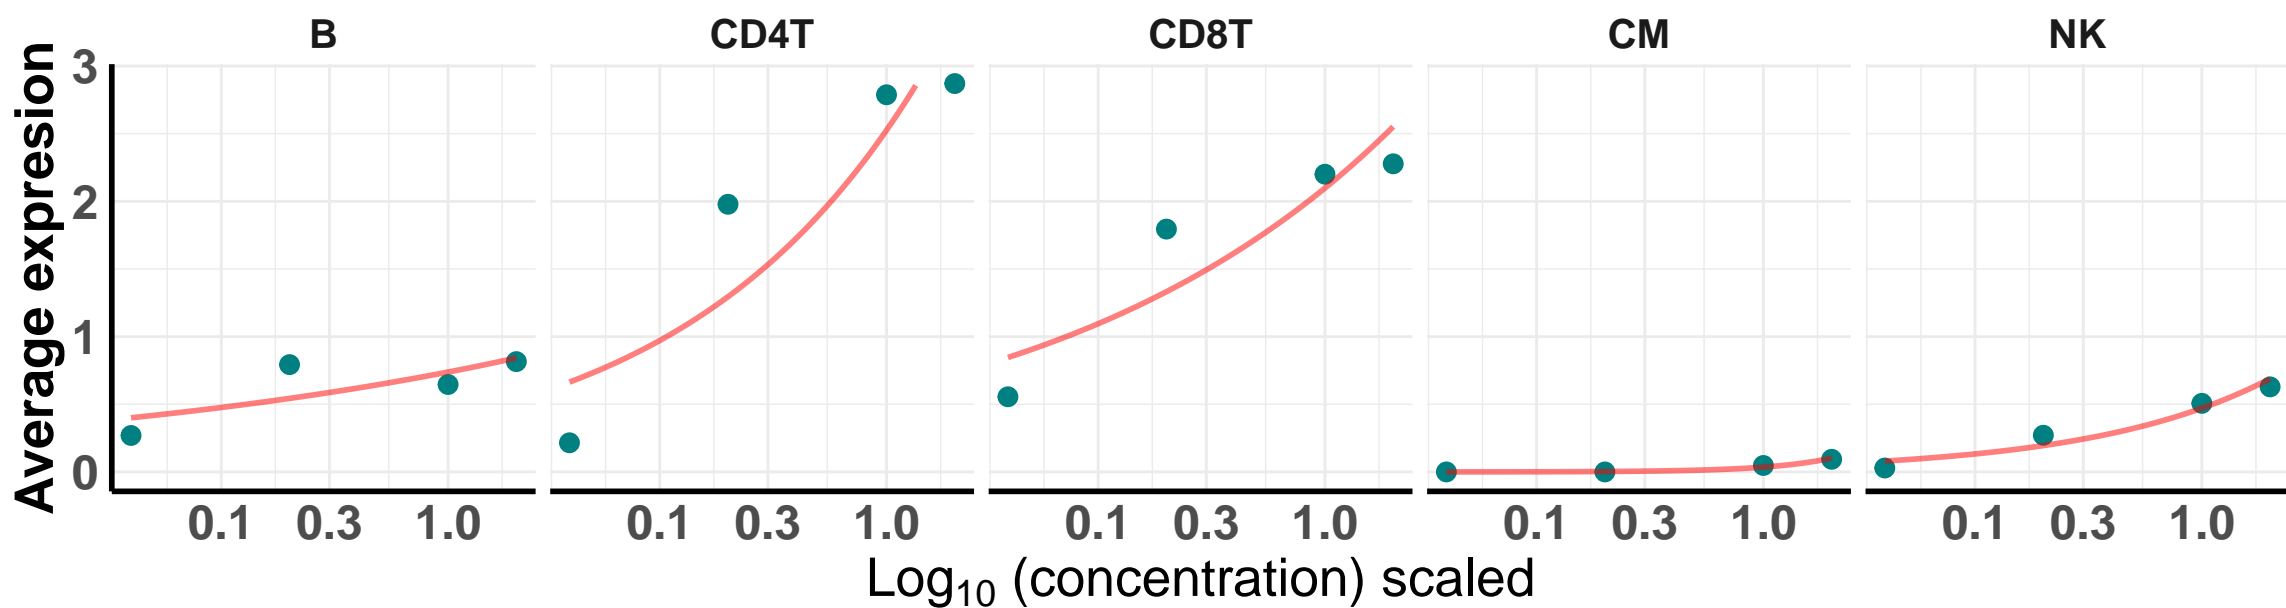

## CD66a.c.e

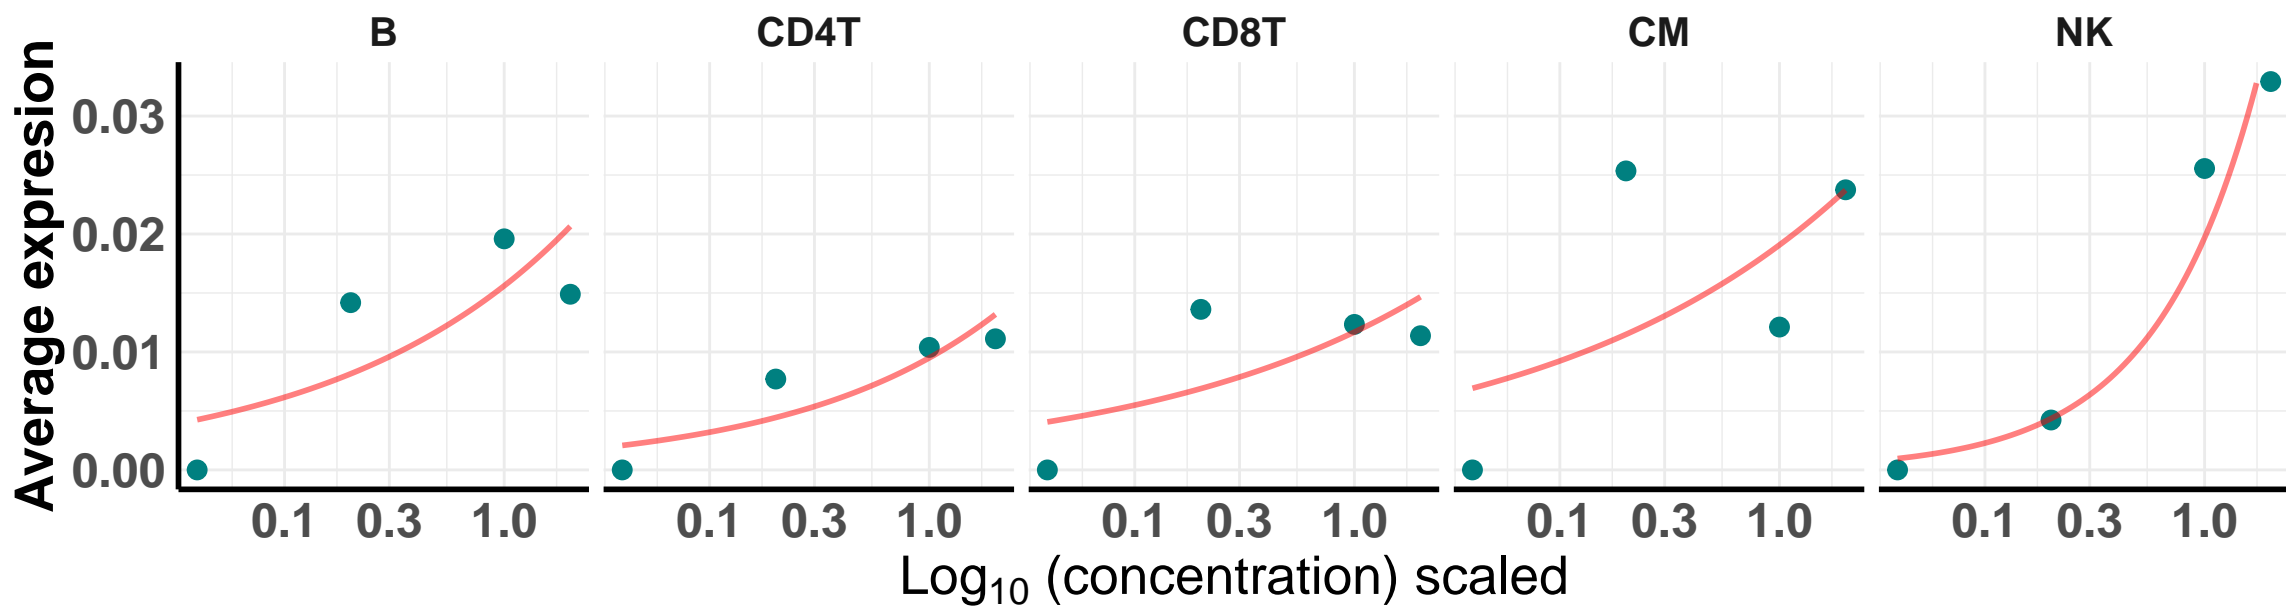

## CD66b

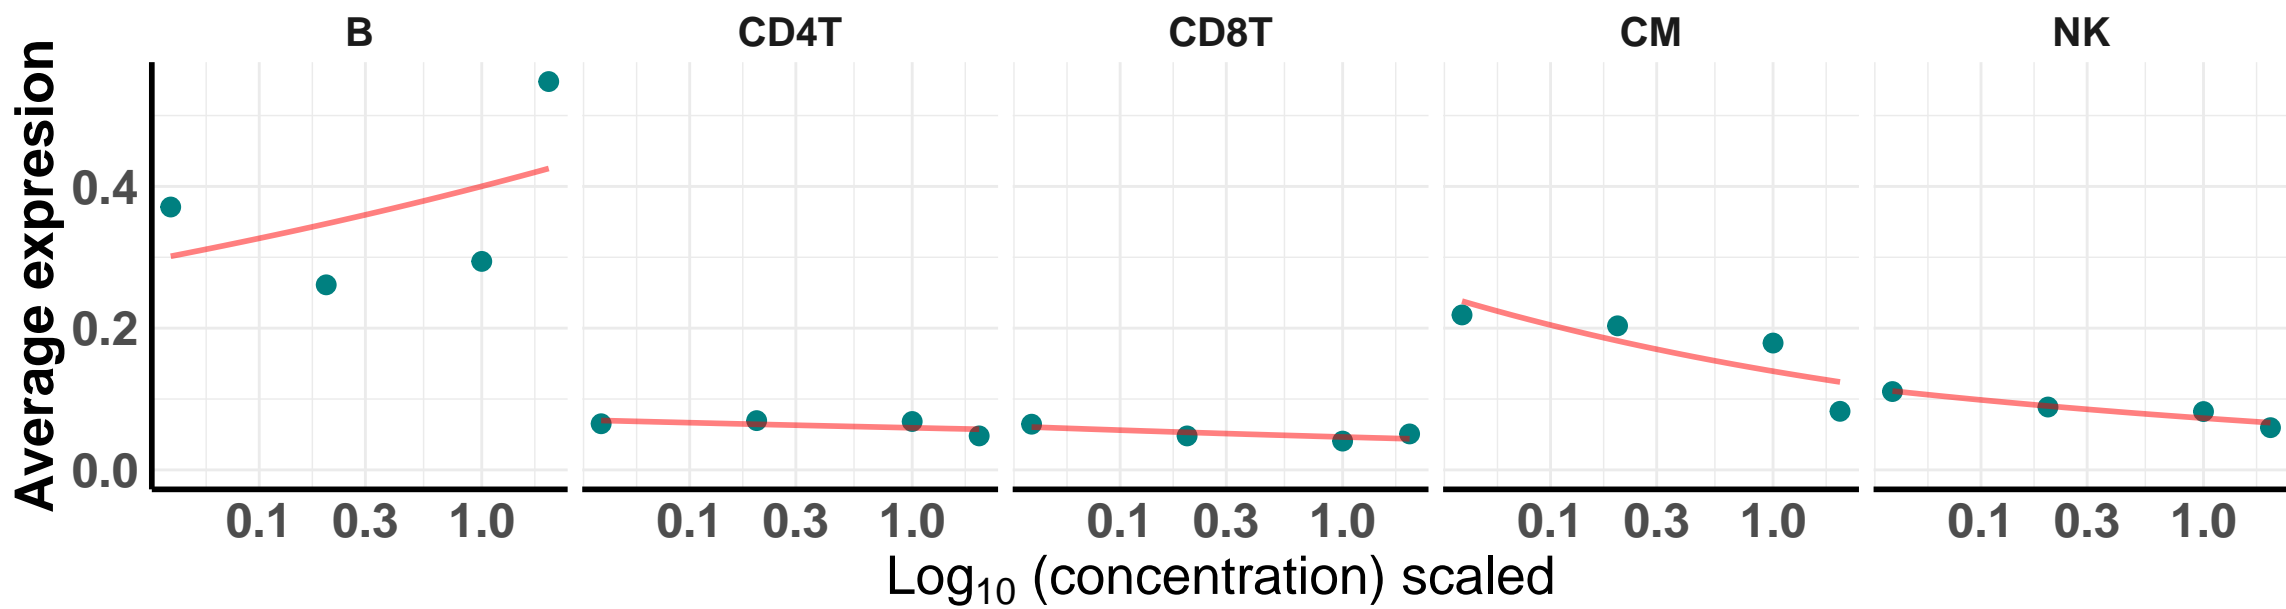

## CD69

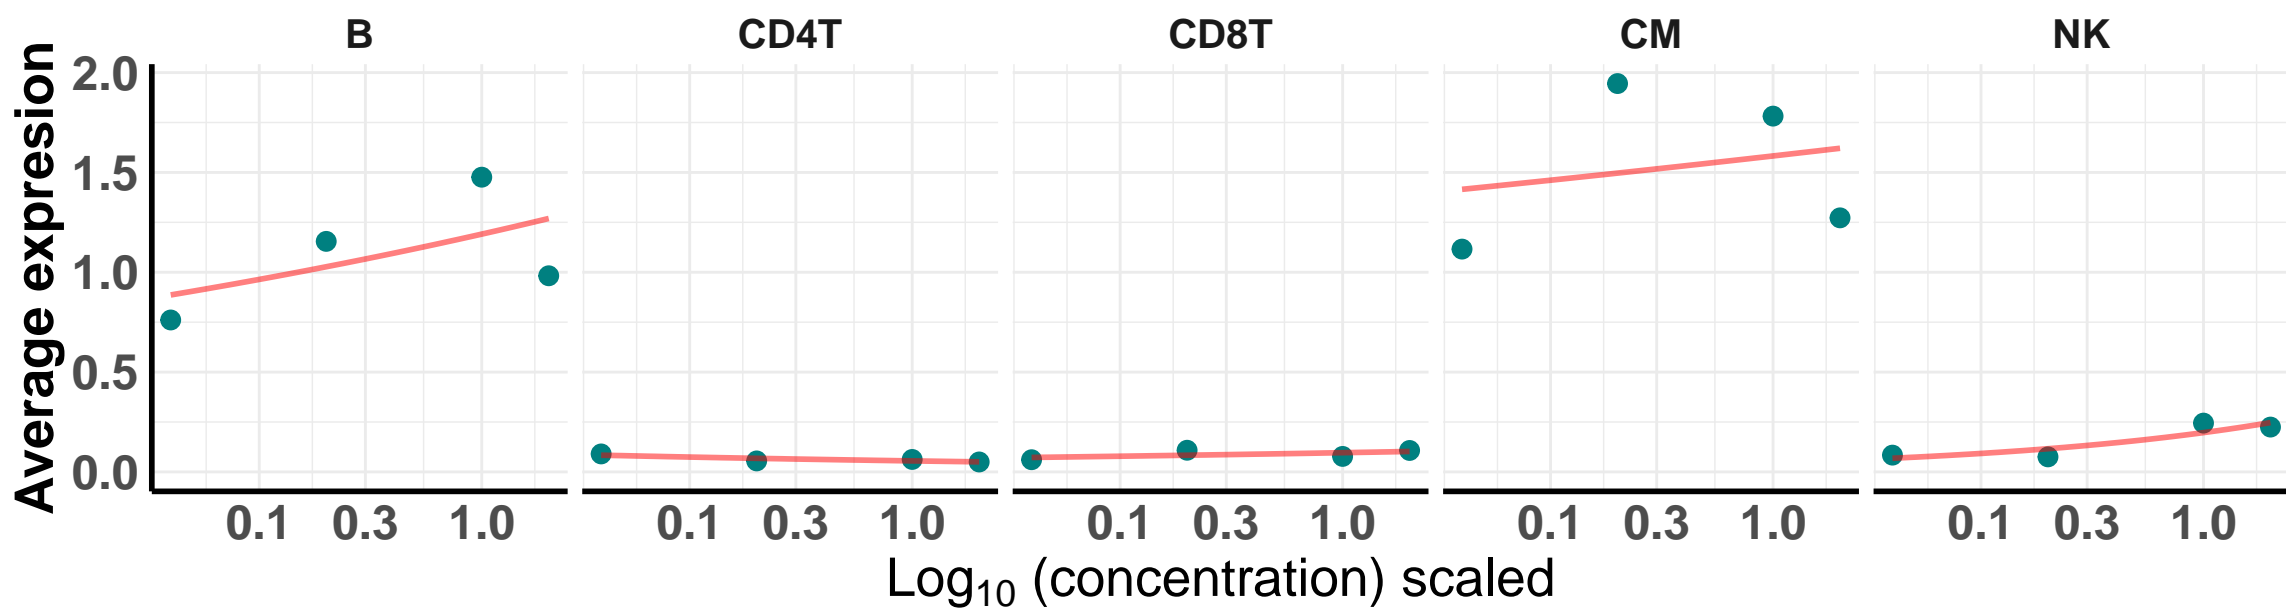

## CD7

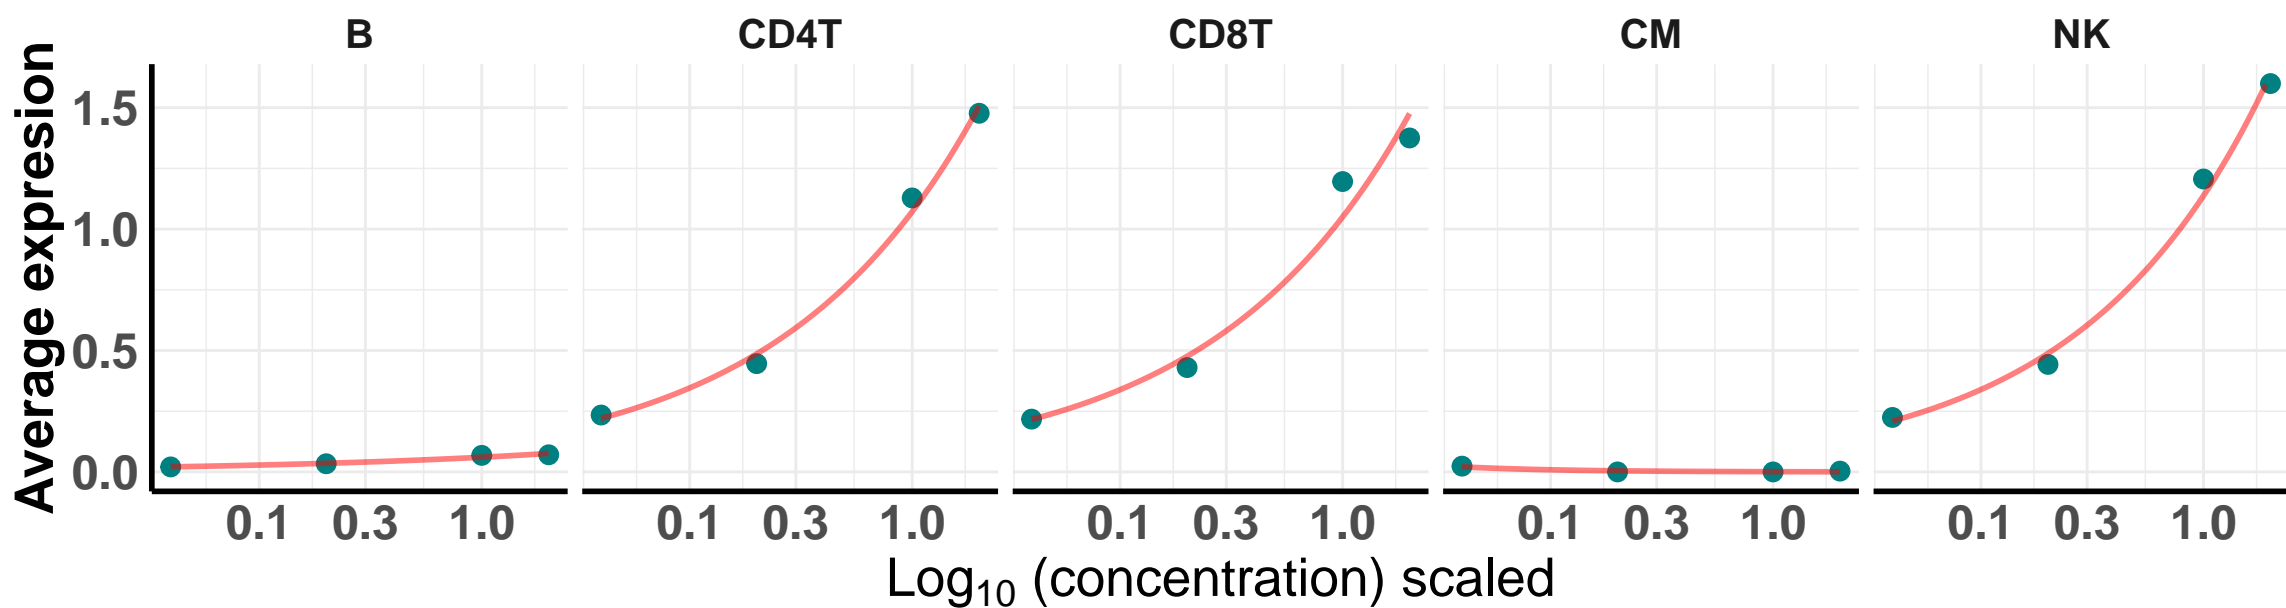



# CD79b

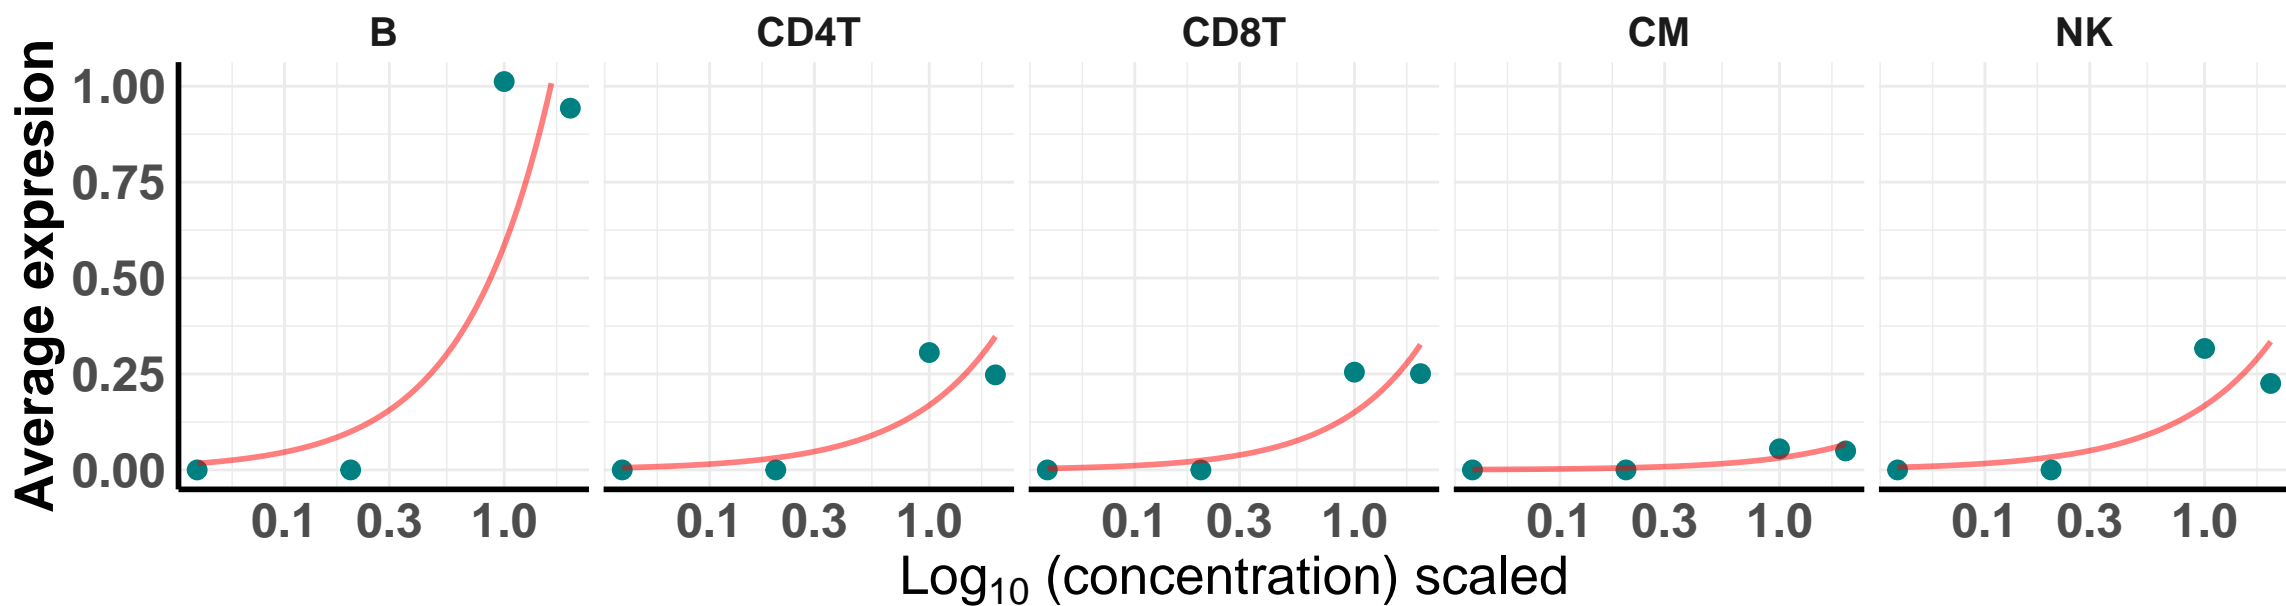

# CD8

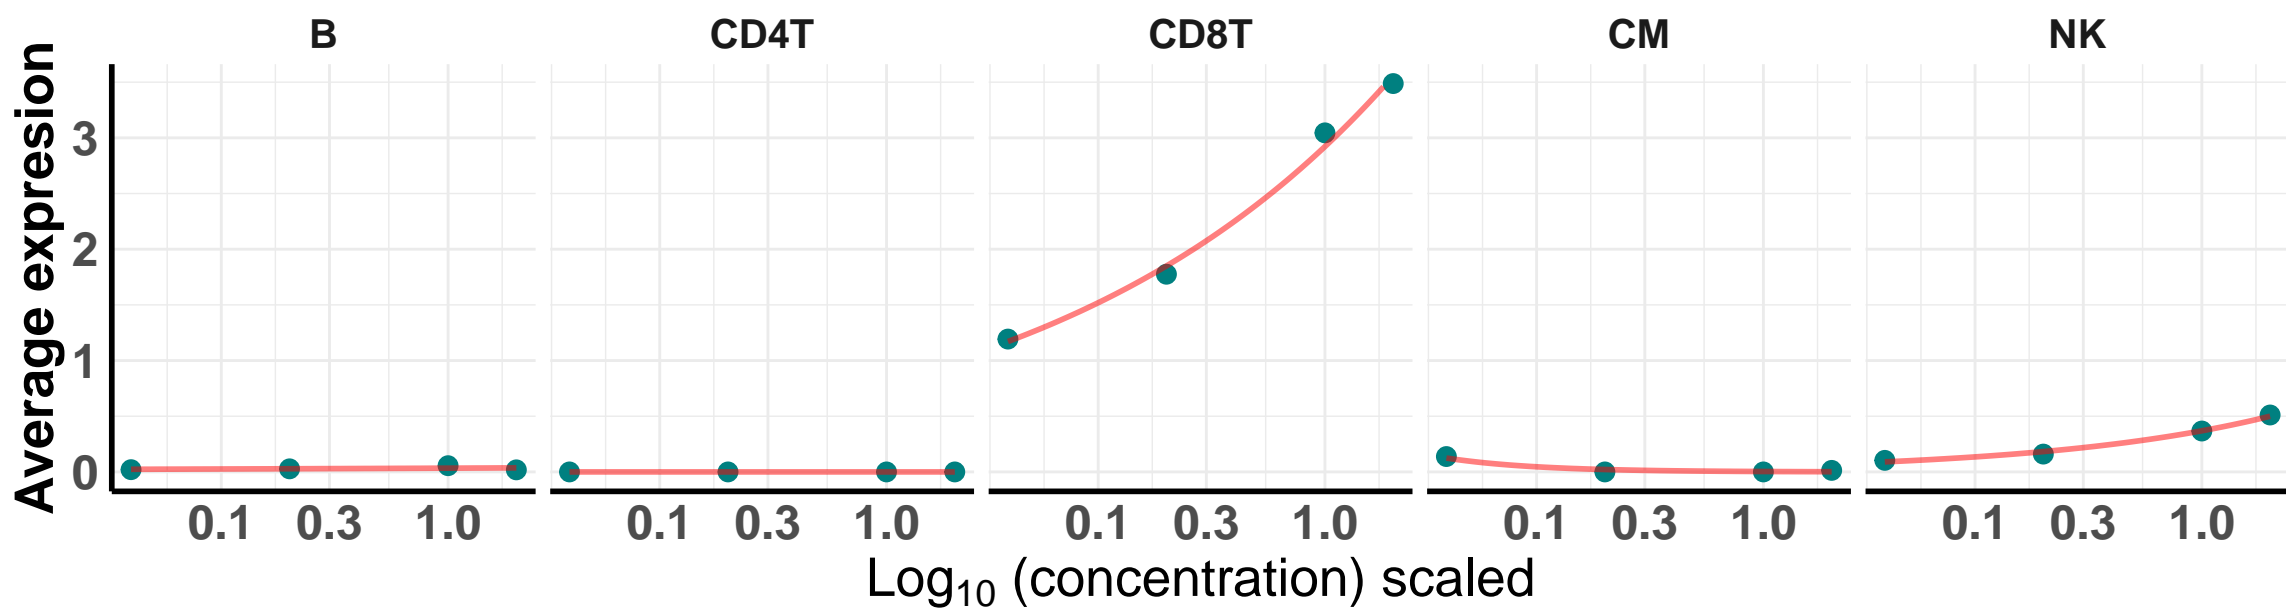

# CD81

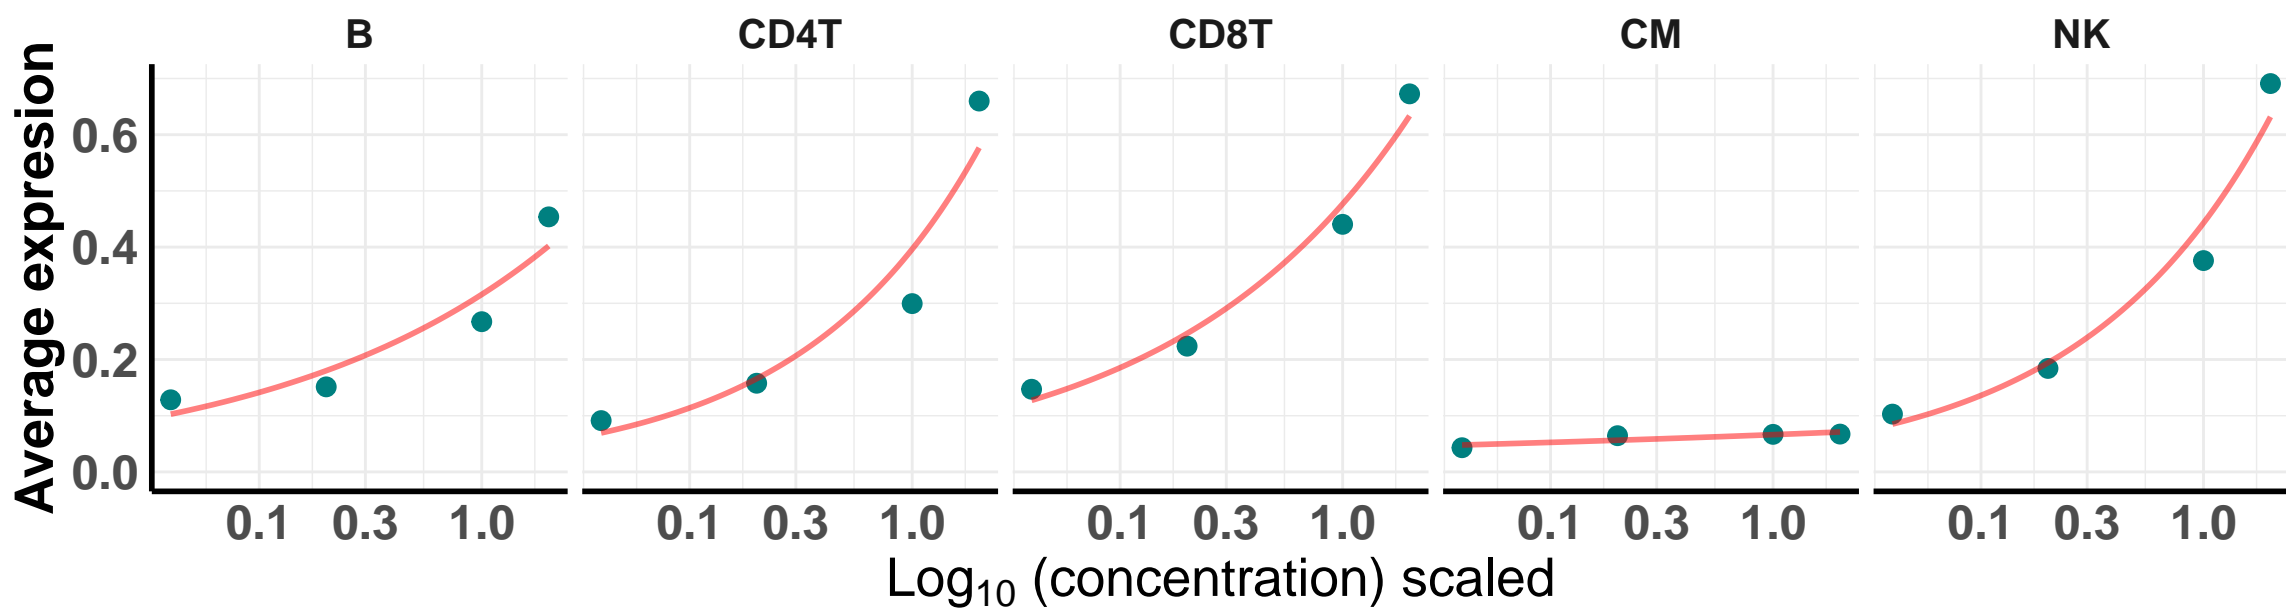

# CD82

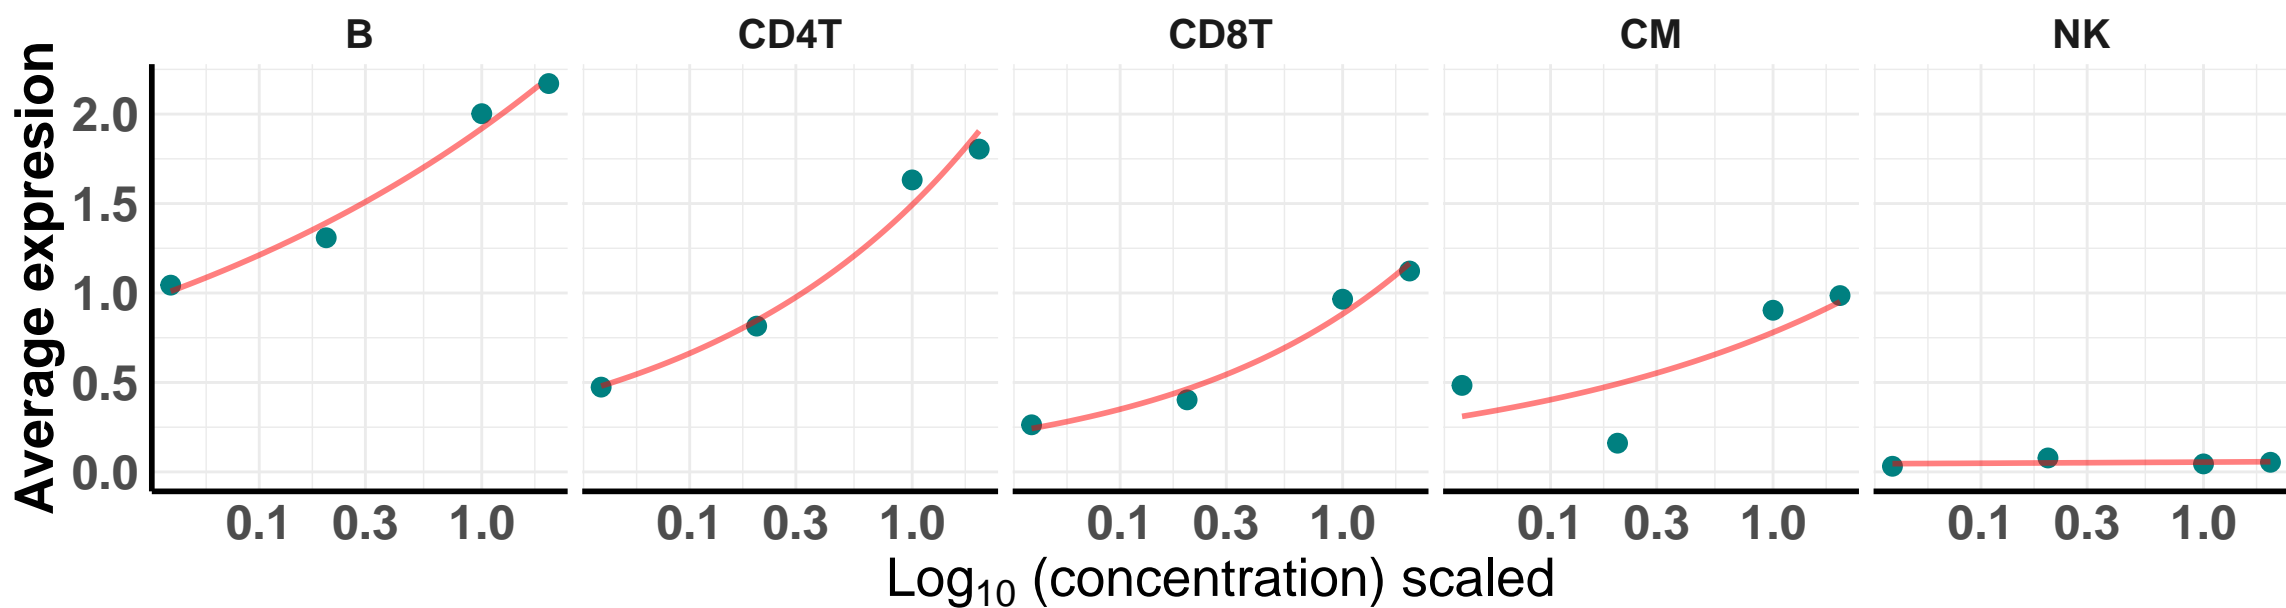

# CD88

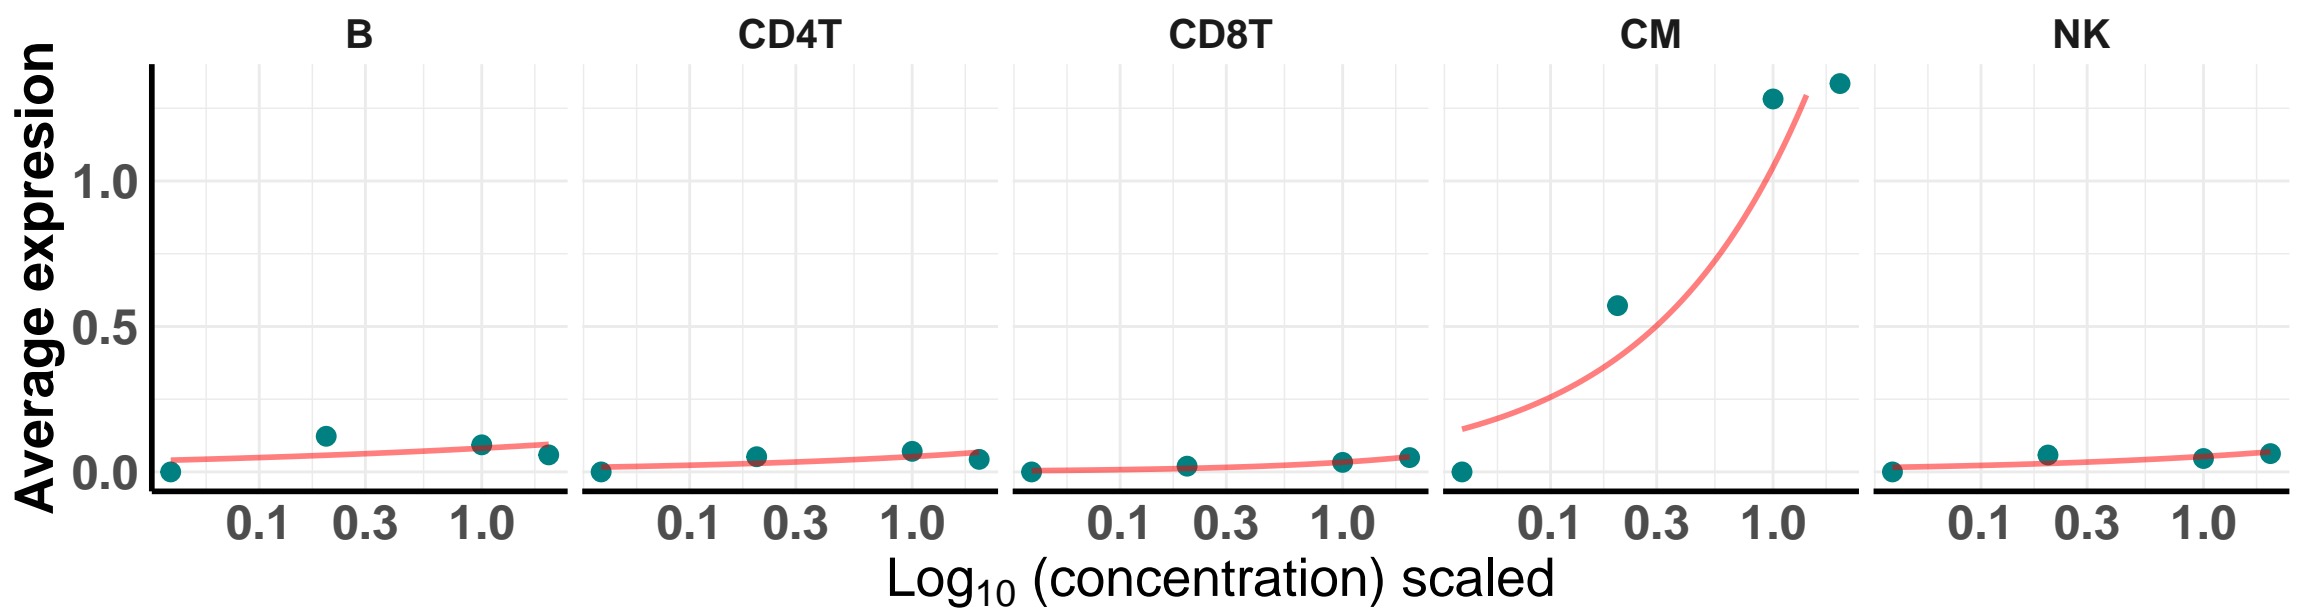

# CD94

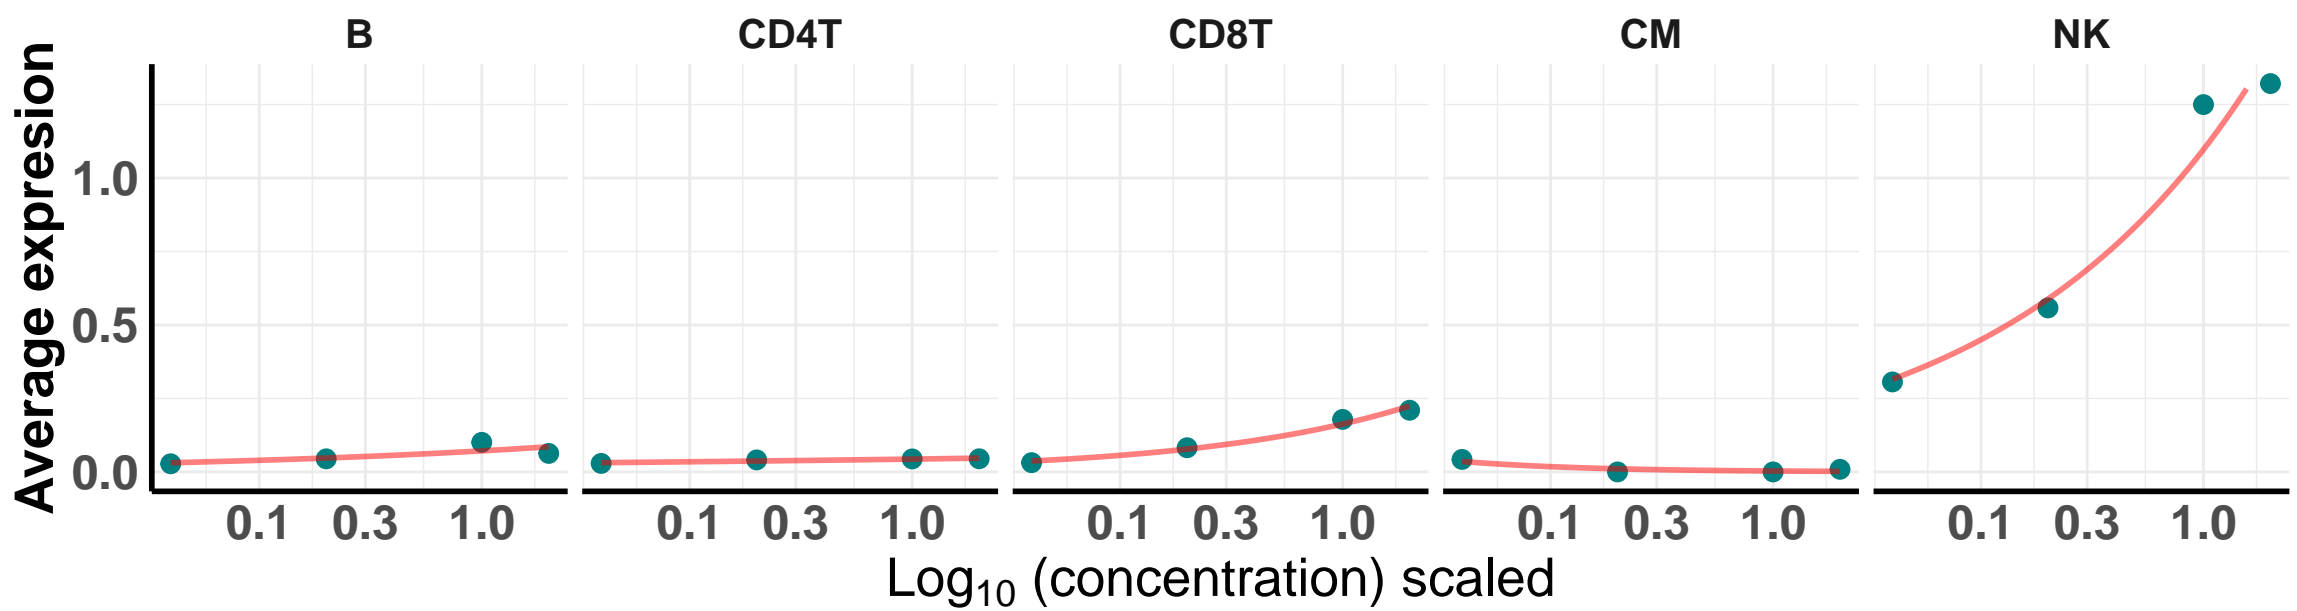

# CD95

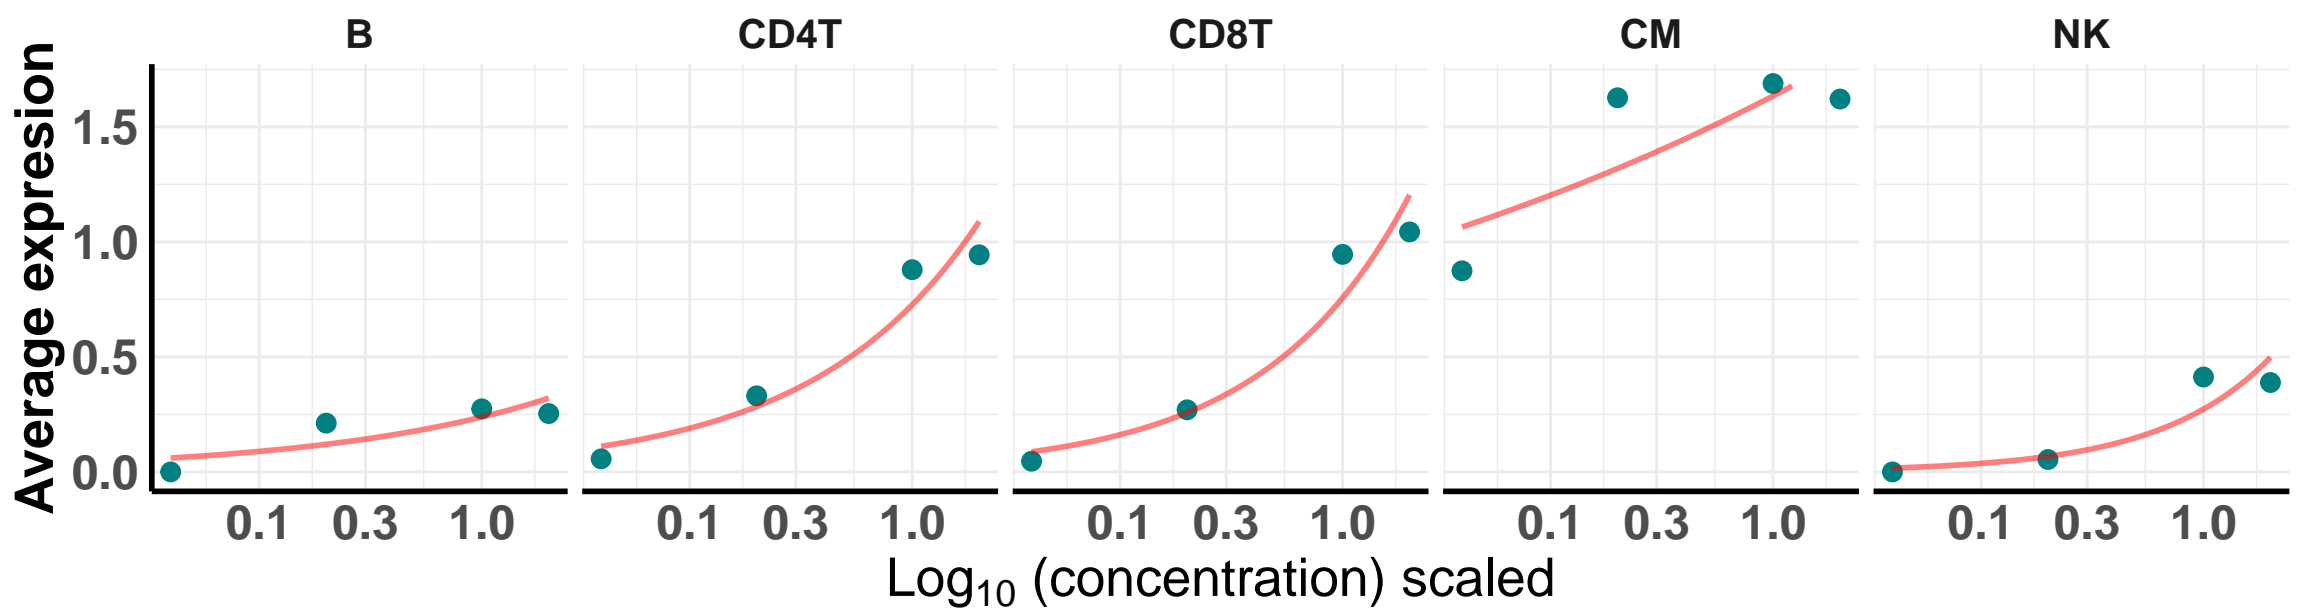

# CD96

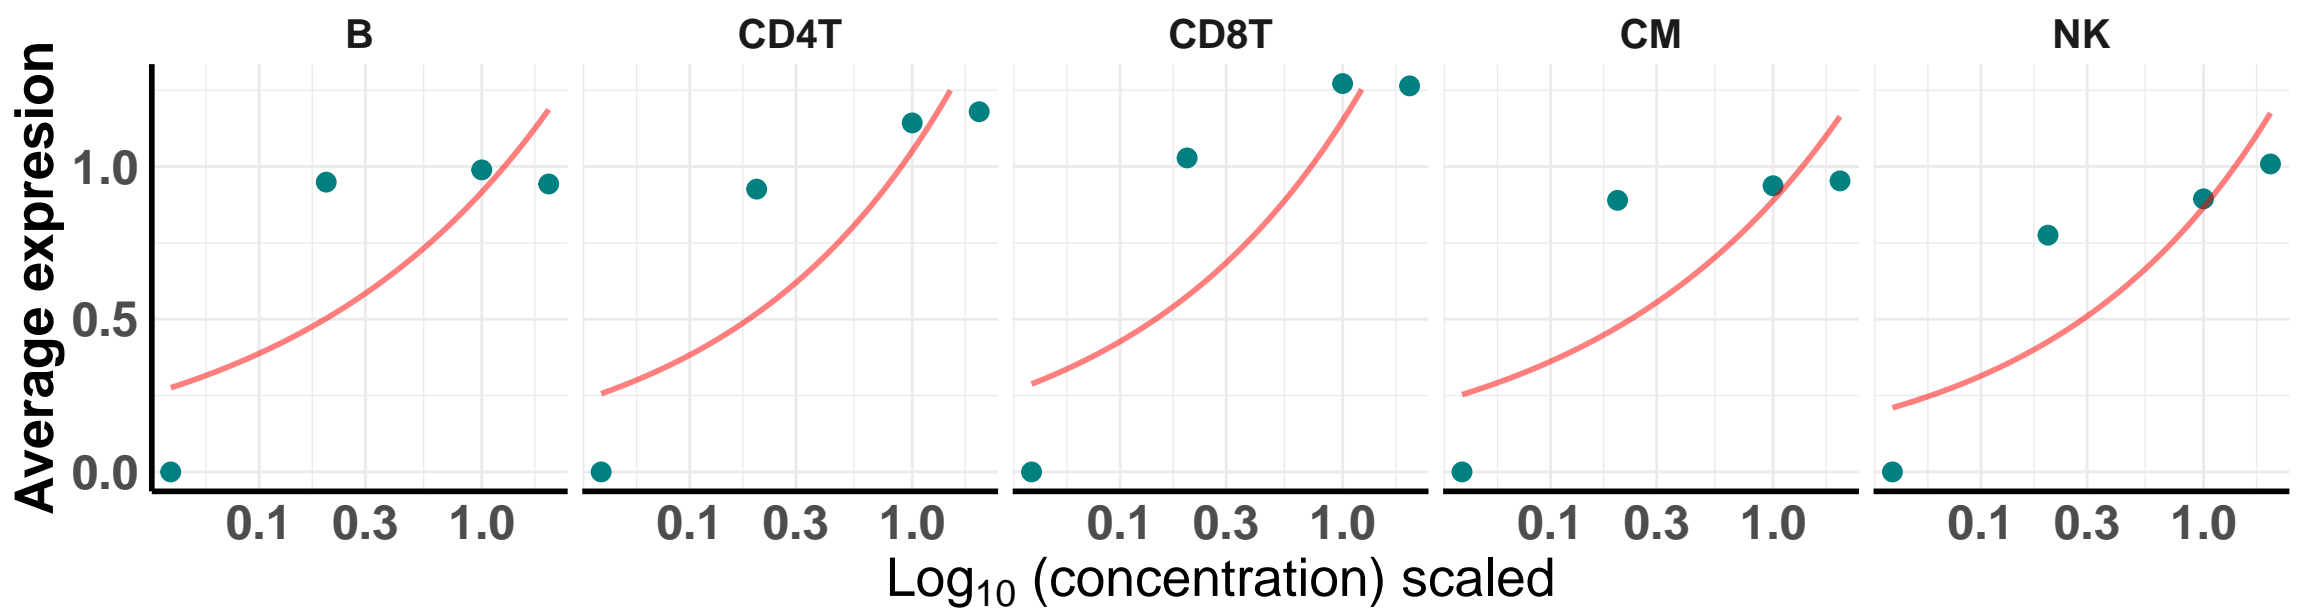

# CLEC12A

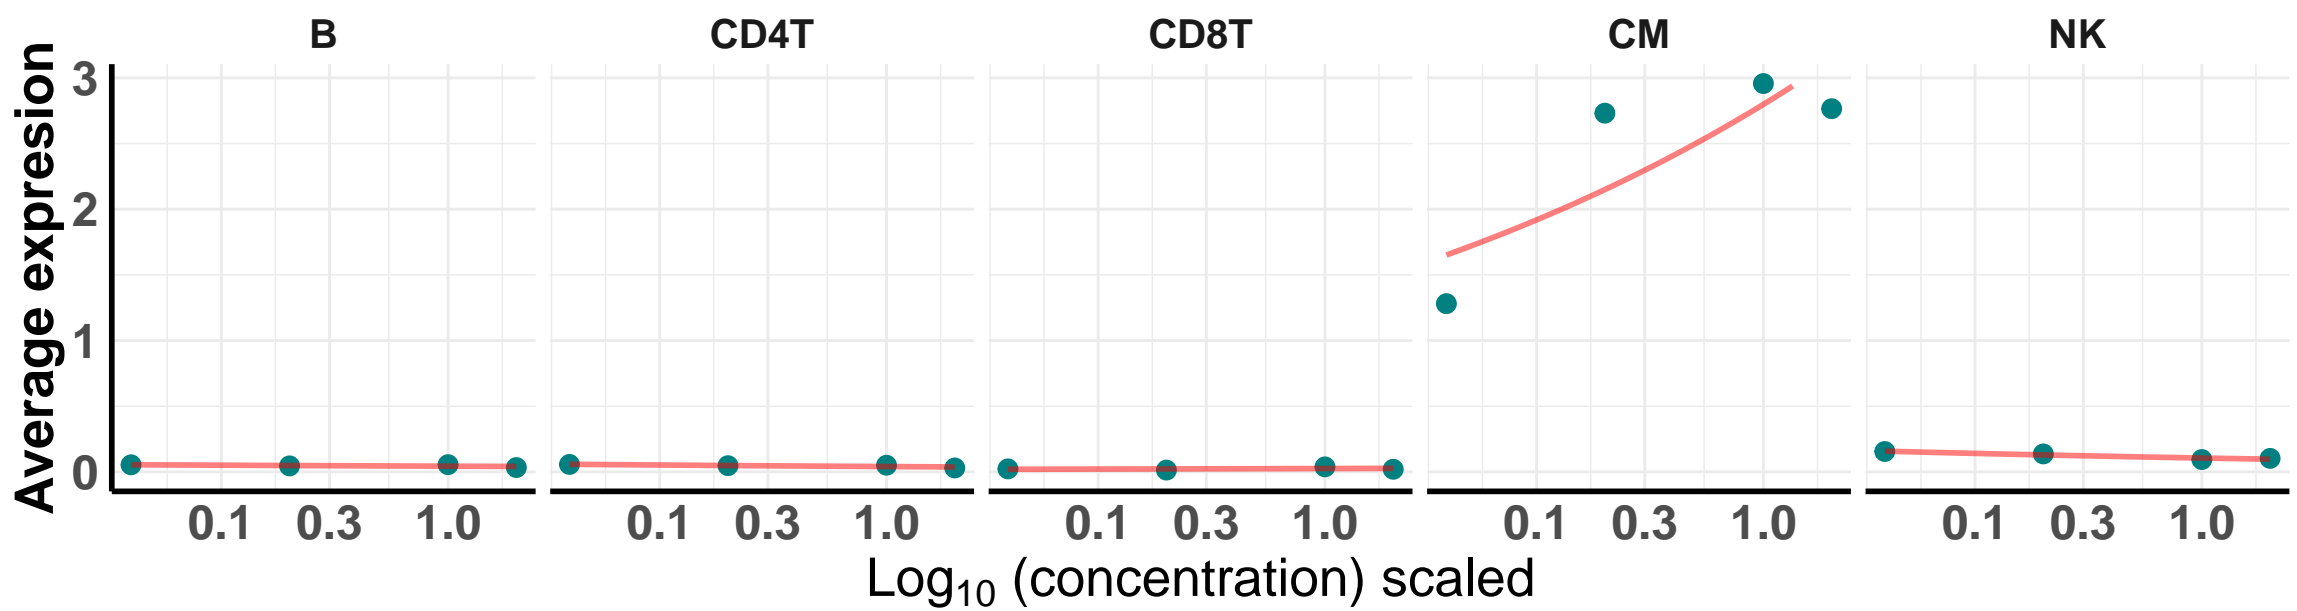

# CX3CR1

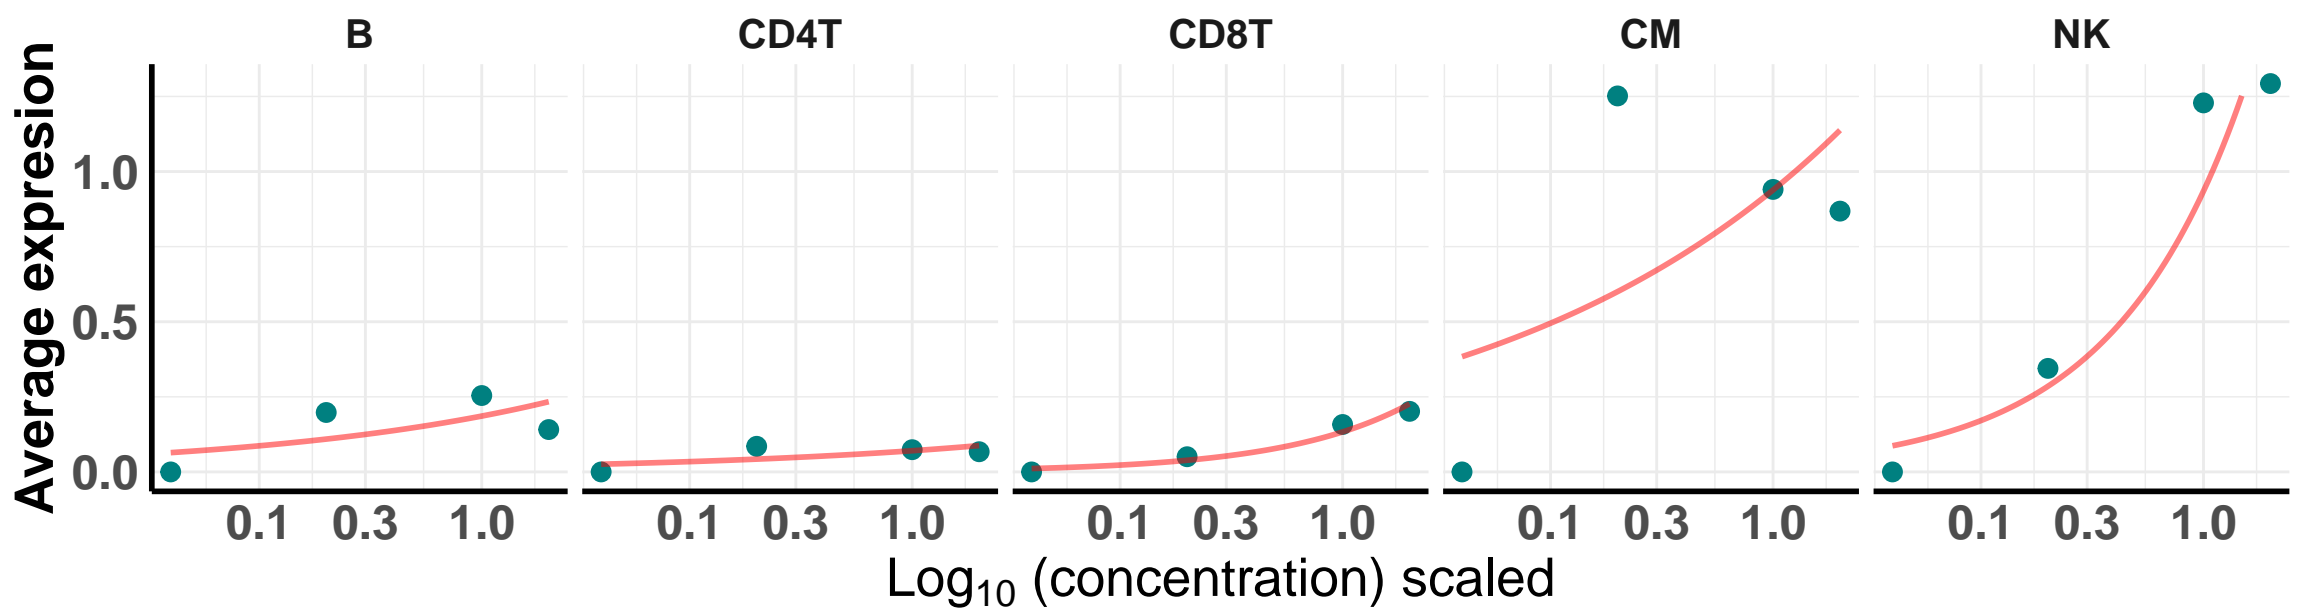

# GARP

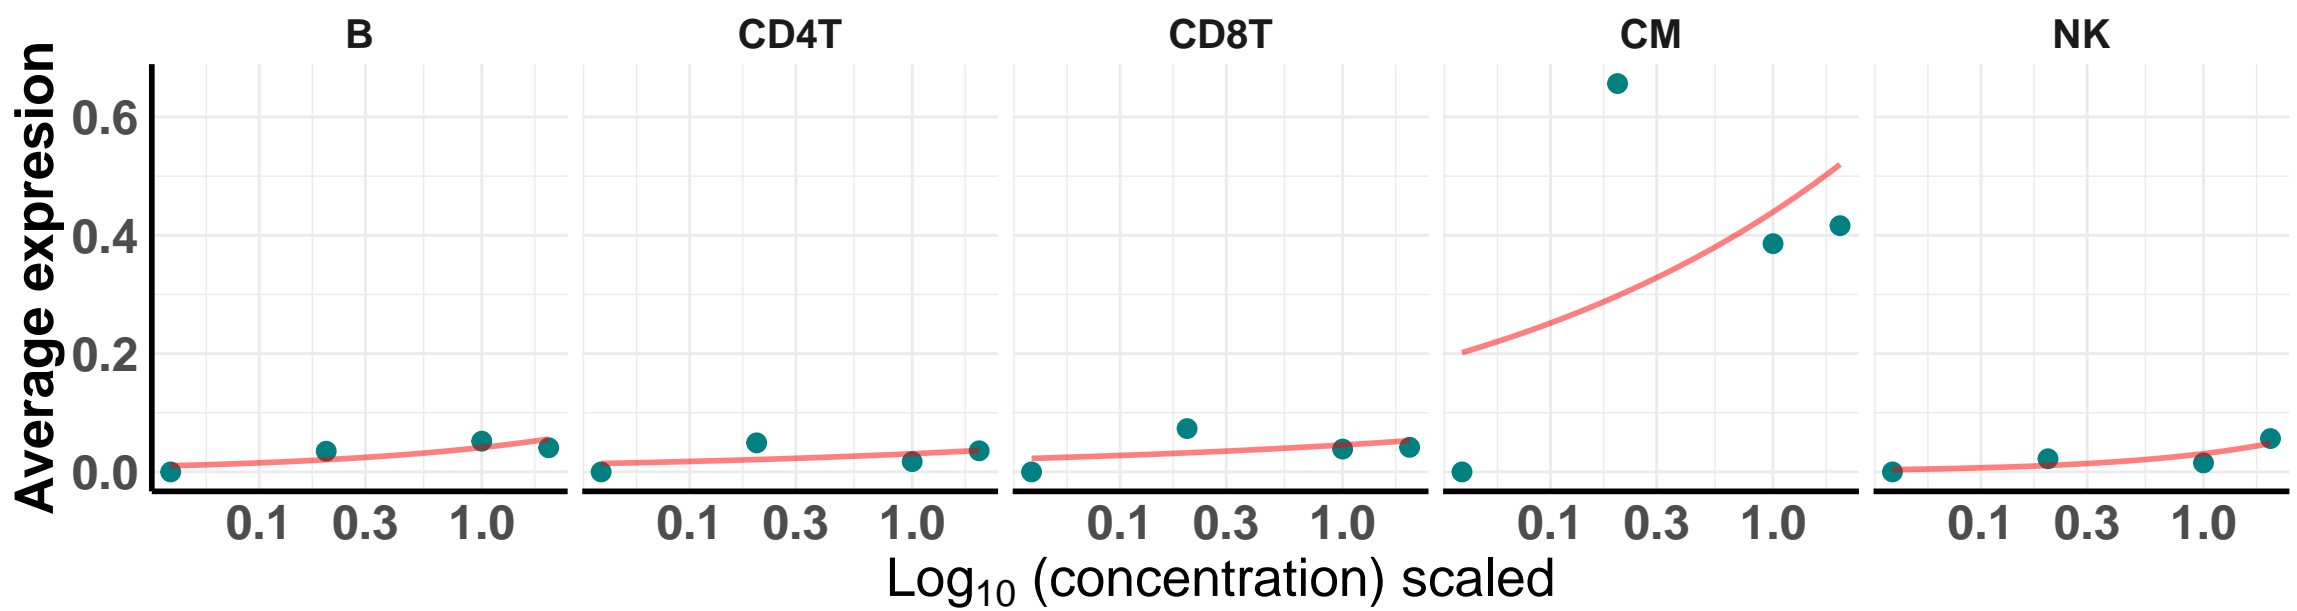

# HLA.DR

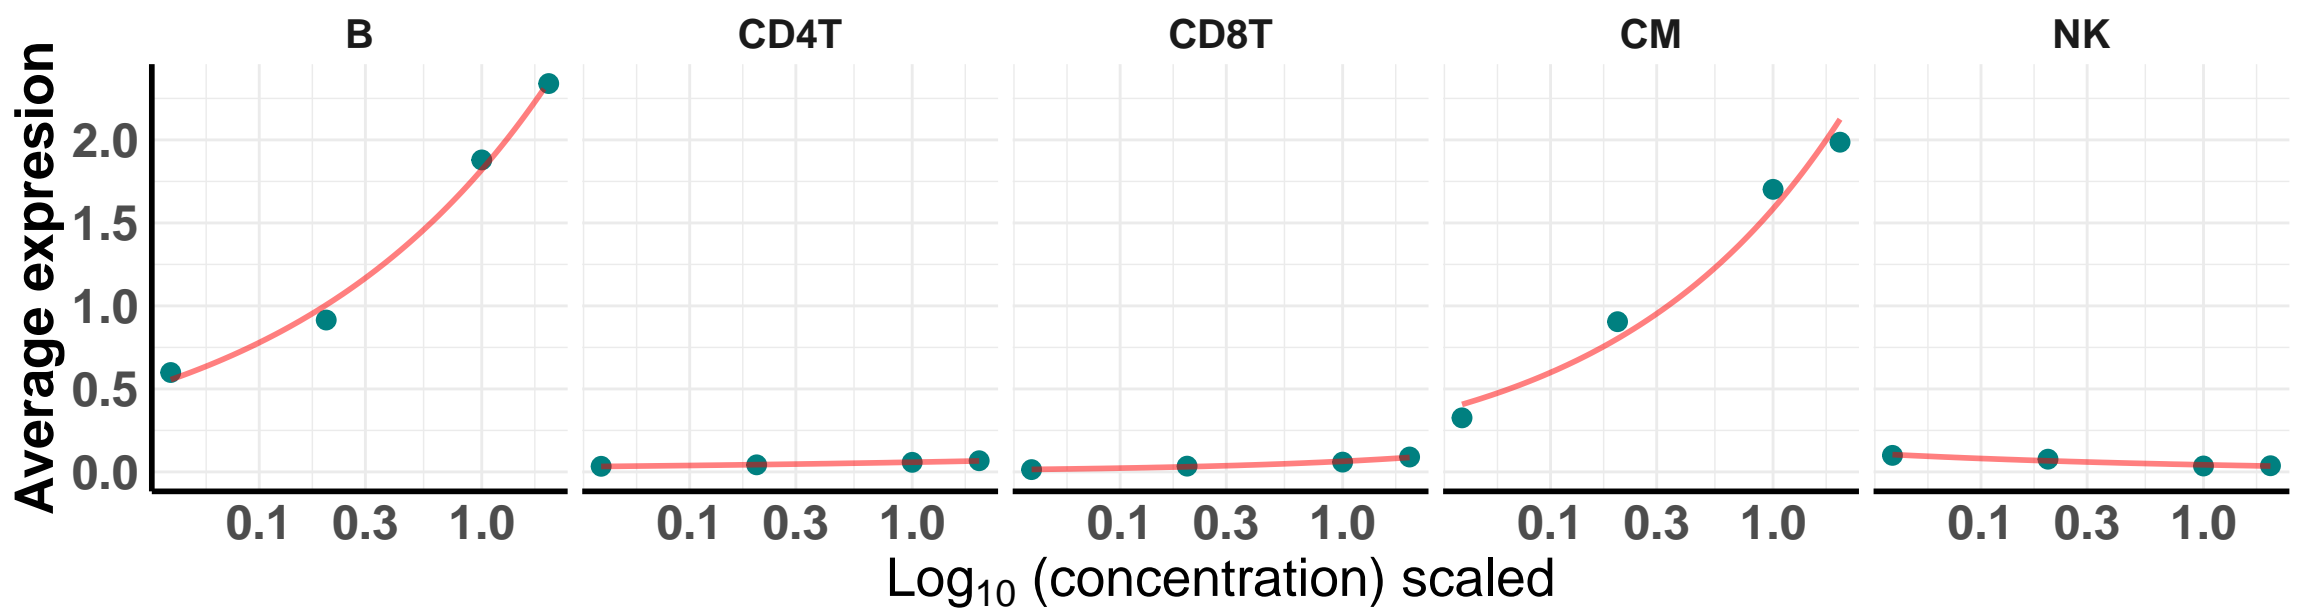

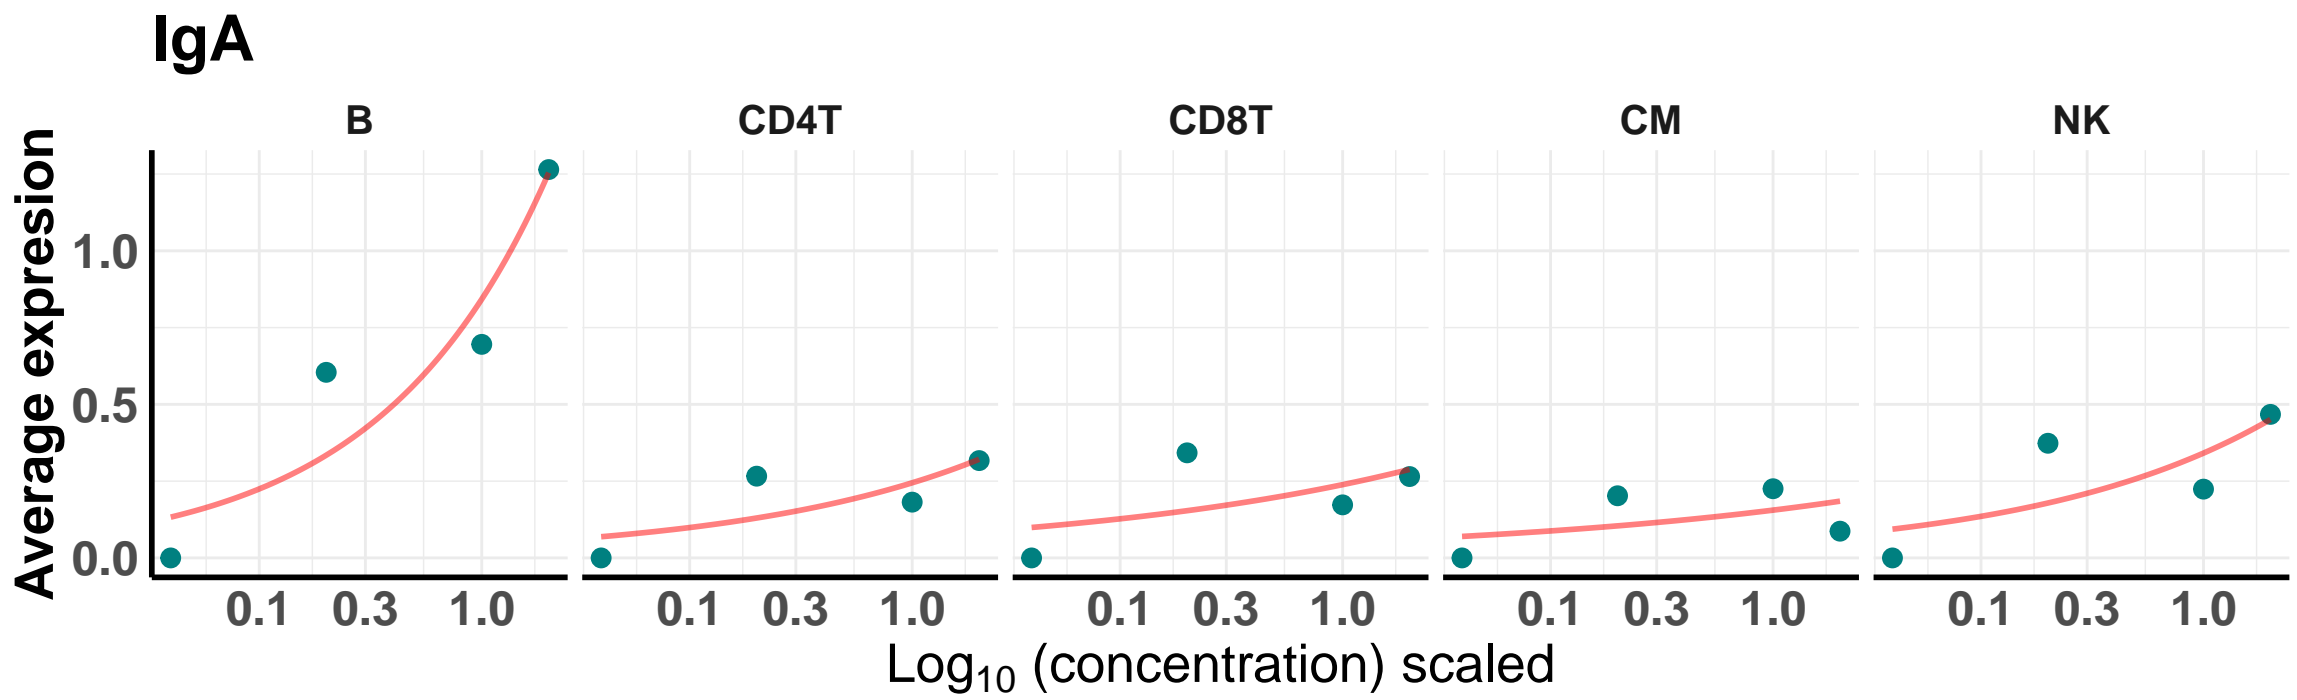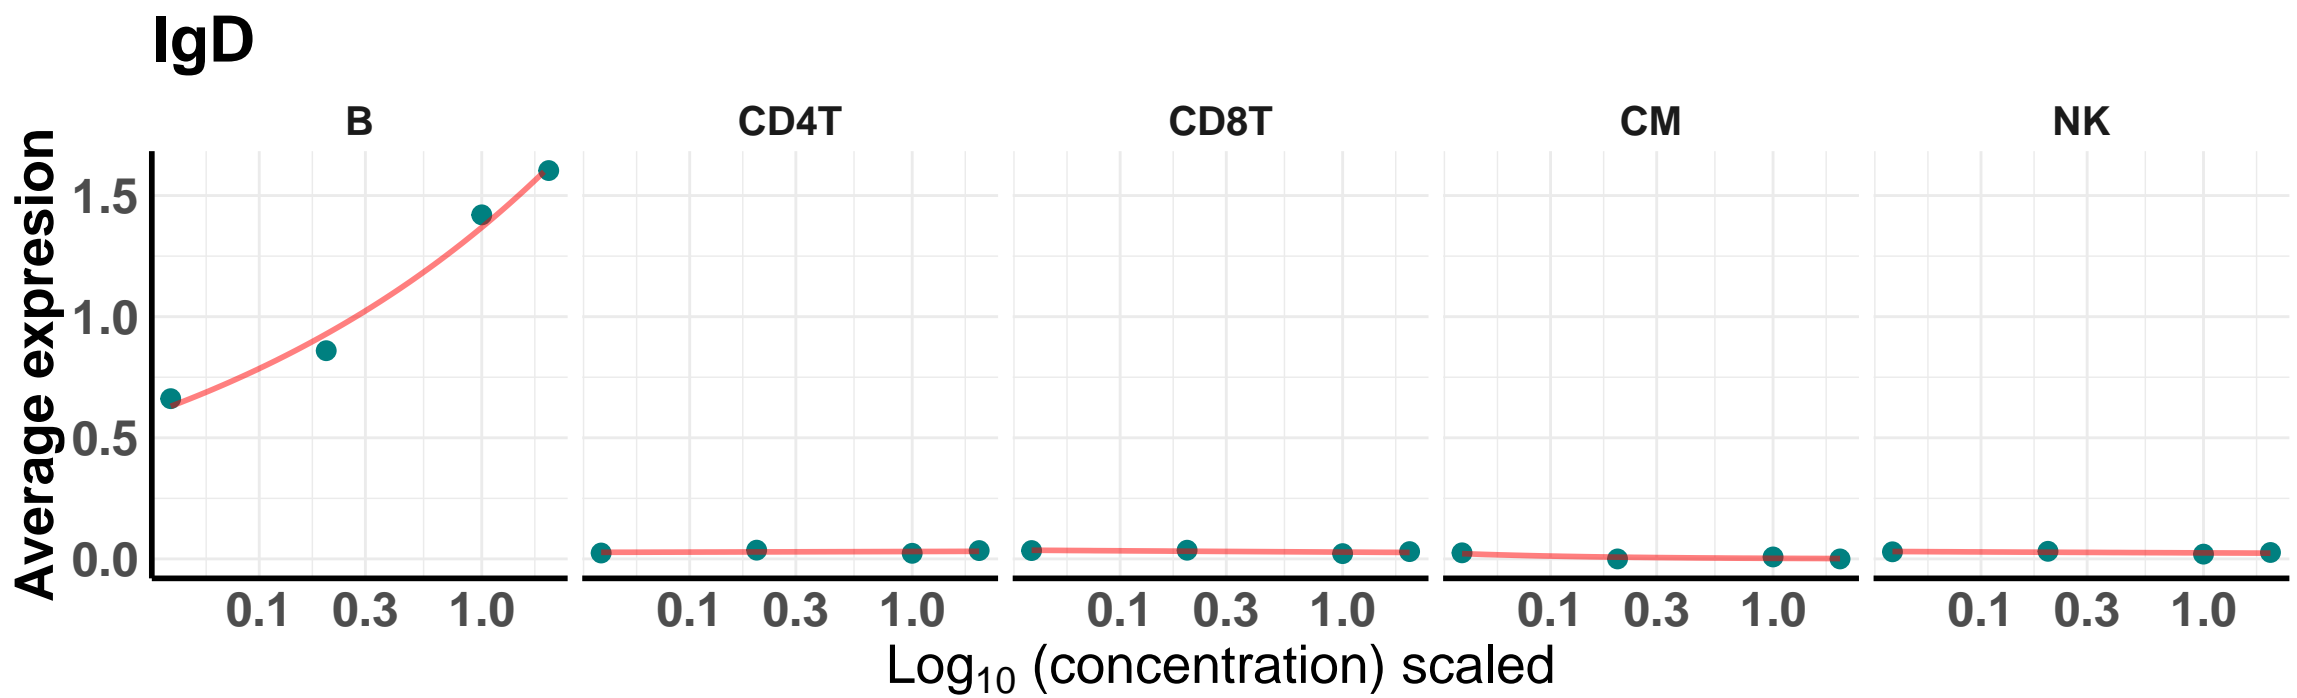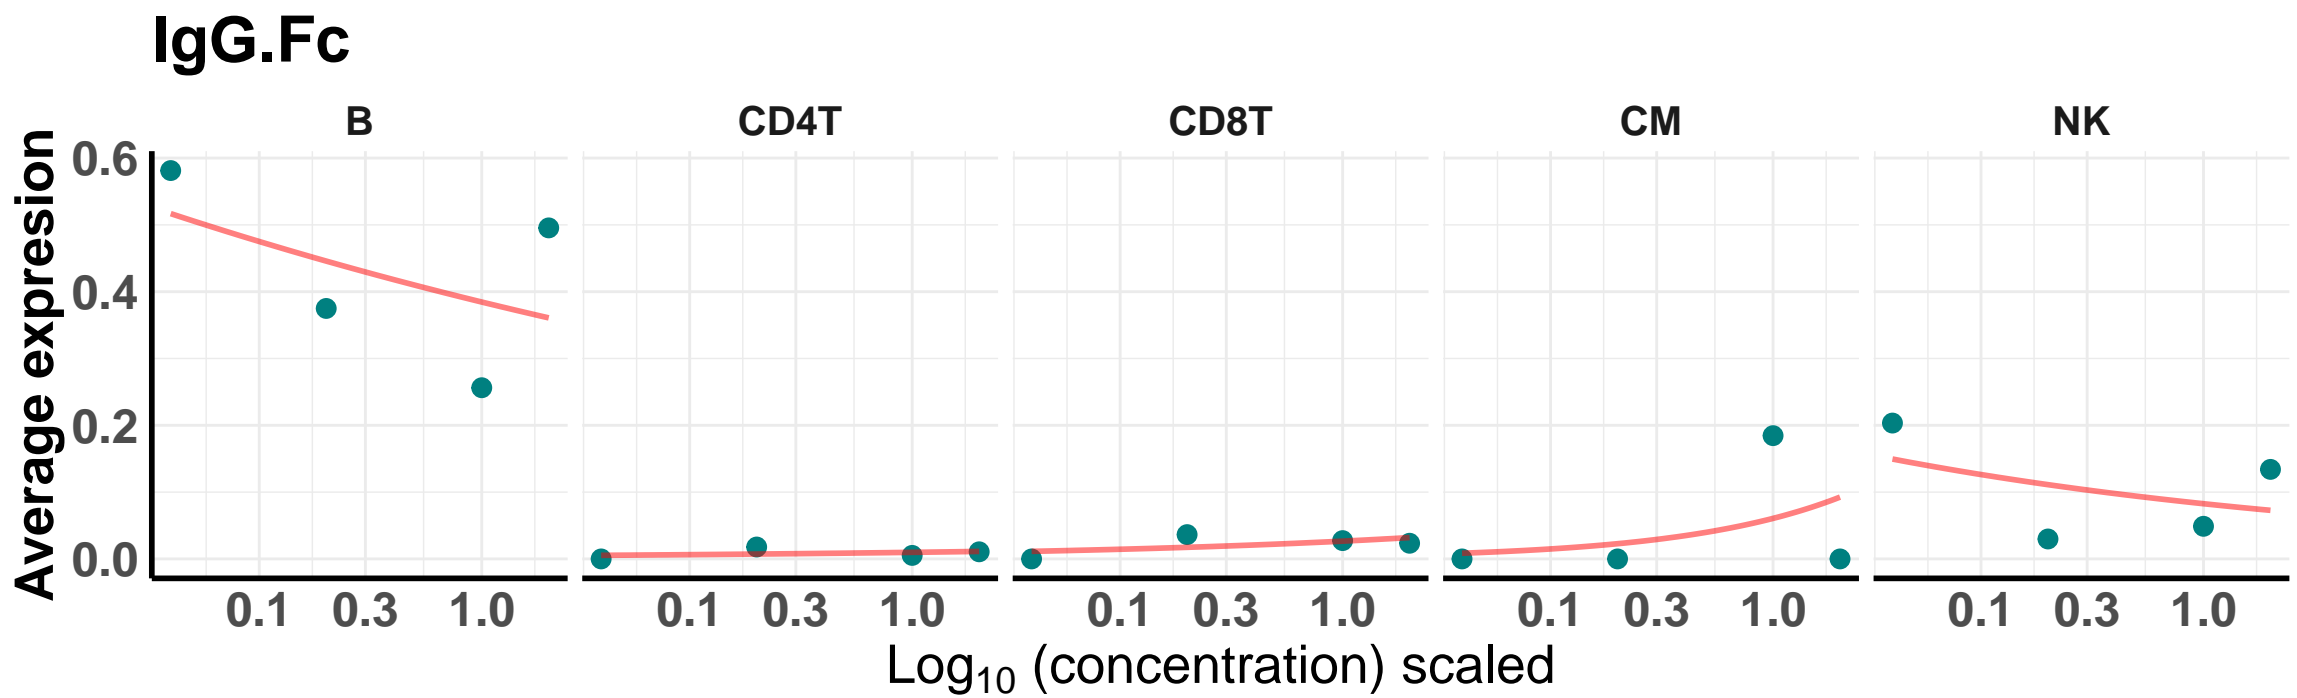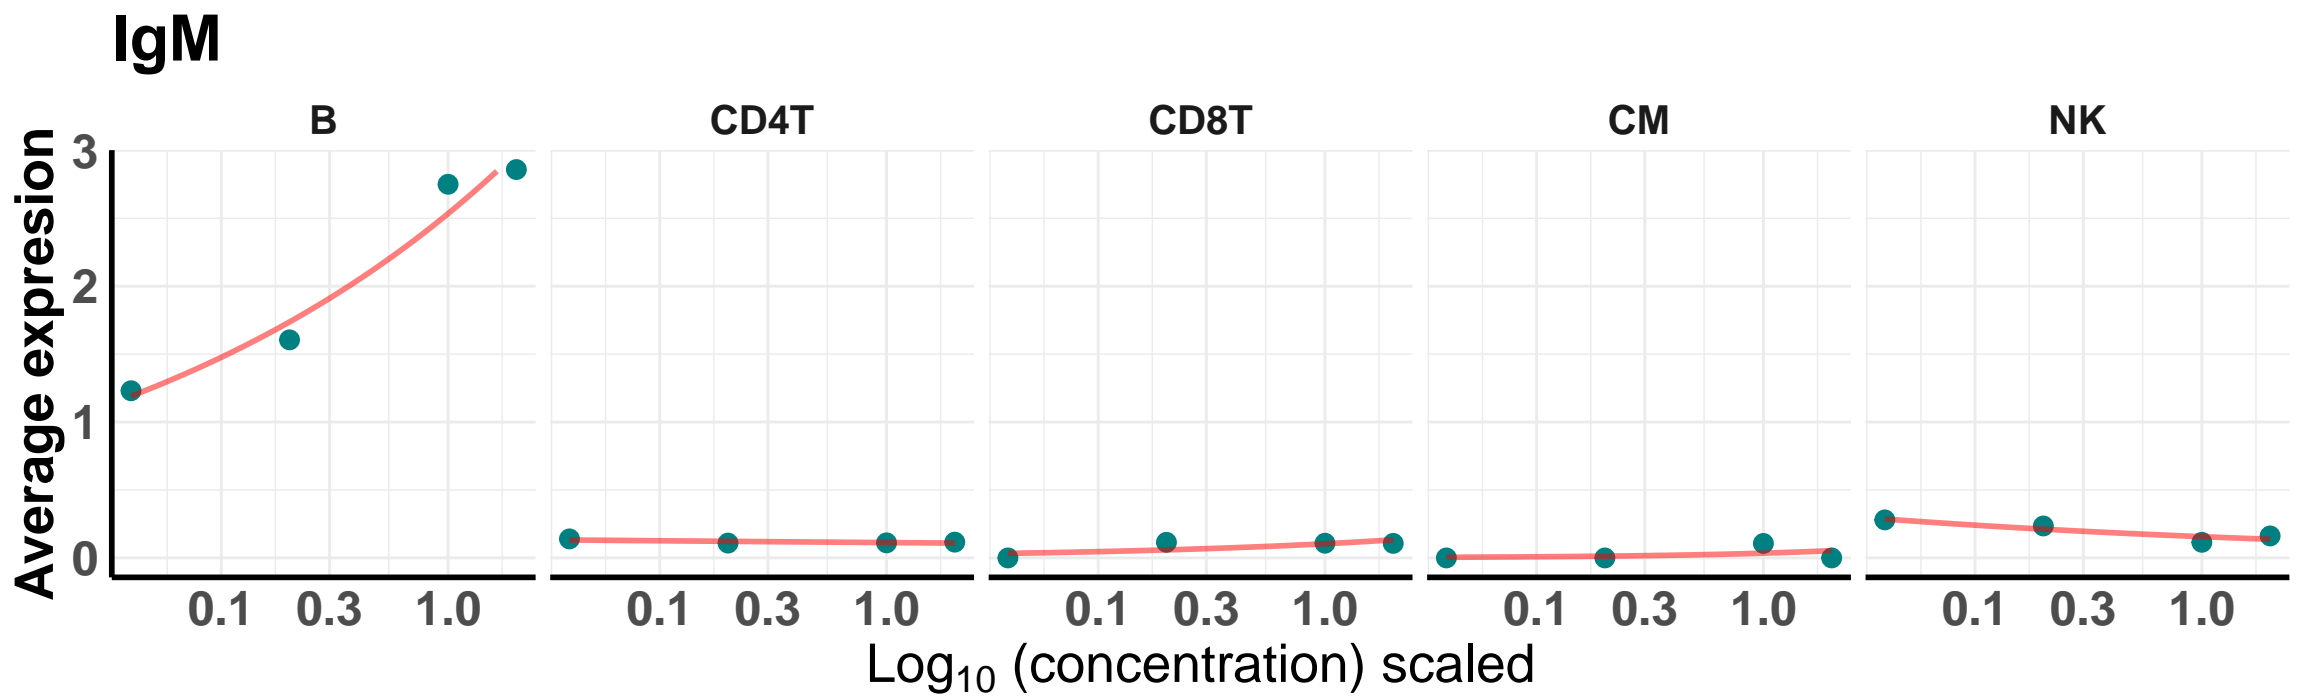

# TCRab

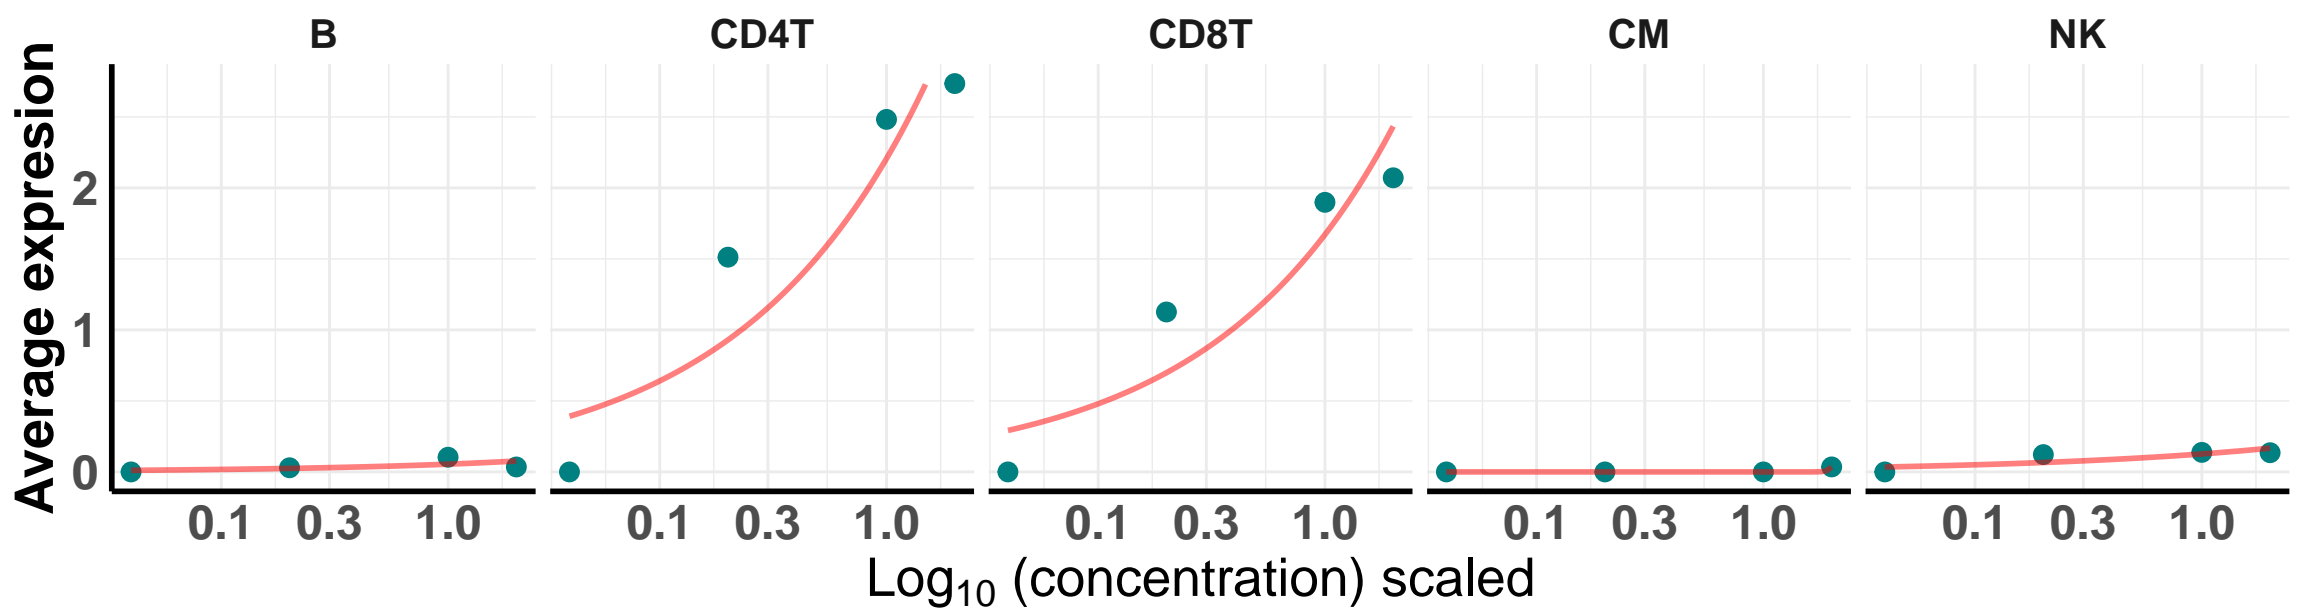

# TIGIT

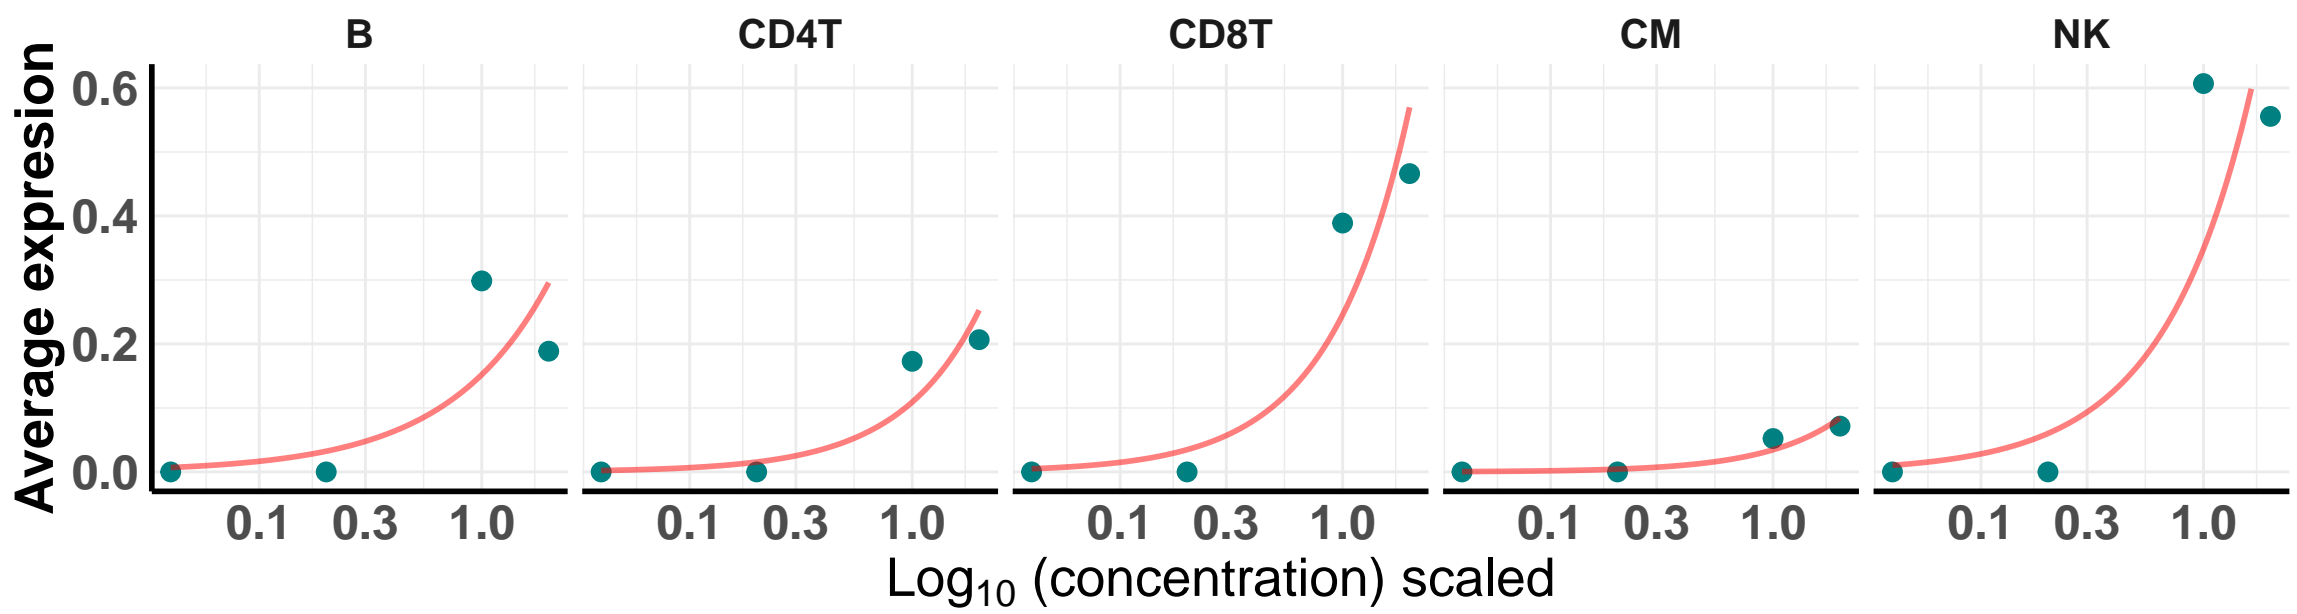

Supplement: 41598_2022_24371_MOESM9_ESM.pdf [file 41598_2022_24371_MOESM9_ESM.pdf]
